# Supplementary material for: Actin networks modulate heterogeneous NF-κB dynamics in response to TNFα
Source: eLife. 2024 Aug 7;13:e86042. doi: 10.7554/eLife.86042 (PMC11524587; doi:10.7554/eLife.86042)
Supplement: Figure 1—source data 1. — Raw data from live microscopy single-cell analysis of MIA PaCa2 and PANC1 cells treated with various TNFα doses. Frequency of experimental and technical (well) repeats performed and frequency of single cells analysed per condition. [file elife-86042-fig1-data1.xlsx]

## Sheet: Fig1 C,F
Bio_rep	Cell_line	Well_Field	TNF	Track_ID	Stage	Frame	Frame_after_TNF	Time_after_TNF_min	Time_after_TNF_hr	Nuc_RELA	Nuc_RELA_imputed	Control_RELA	Nuc_RELA_norm
1	MIA PaCa2	D13_2	0.01	1_D13_2_131	S	5	-15	-150	-2.5	99.9511	99.9511	93.7282	1.06639
1	MIA PaCa2	D13_2	0.01	1_D13_2_131	S	6	-14	-140	-2.33333	100	100	91.2043	1.09644
1	MIA PaCa2	D13_2	0.01	1_D13_2_131	S	7	-13	-130	-2.16667	104.718	104.718	91.0398	1.15024
1	MIA PaCa2	D13_2	0.01	1_D13_2_131	S	8	-12	-120	-2	107.724	107.724	89.9628	1.19742
1	MIA PaCa2	D13_2	0.01	1_D13_2_131	S	9	-11	-110	-1.83333	104.896	104.896	88.8498	1.1806
1	MIA PaCa2	D13_2	0.01	1_D13_2_131	S	10	-10	-100	-1.66667	101.097	101.097	88.0257	1.14849
1	MIA PaCa2	D13_2	0.01	1_D13_2_131	S	11	-9	-90	-1.5	95.2984	95.2984	87.39	1.0905
1	MIA PaCa2	D13_2	0.01	1_D13_2_131	S	12	-8	-80	-1.33333	97.3091	97.3091	86.2825	1.1278
1	MIA PaCa2	D13_2	0.01	1_D13_2_131	S	13	-7	-70	-1.16667	92.0996	92.0996	84.872	1.08516
1	MIA PaCa2	D13_2	0.01	1_D13_2_131	S	14	-6	-60	-1	94.4425	94.4425	85.6506	1.10265
1	MIA PaCa2	D13_2	0.01	1_D13_2_131	S	15	-5	-50	-0.833333	98.8376	98.8376	84.1405	1.17467
1	MIA PaCa2	D13_2	0.01	1_D13_2_131	S	16	-4	-40	-0.666667	101.708	101.708	82.5286	1.2324
1	MIA PaCa2	D13_2	0.01	1_D13_2_131	S	17	-3	-30	-0.5	88.3071	88.3071	83.098	1.06269
1	MIA PaCa2	D13_2	0.01	1_D13_2_131	S	18	-2	-20	-0.333333	88.1418	88.1418	82.7797	1.06478
1	MIA PaCa2	D13_2	0.01	1_D13_2_131	S	19	-1	-10	-0.166667	87.9154	87.9154	82.0129	1.07197
1	MIA PaCa2	D13_2	0.01	1_D13_2_131	S	20	0	0	0	85.575	85.575	81.1847	1.05408
1	MIA PaCa2	D13_2	0.01	1_D13_2_131	S	21	1	10	0.166667	90.4083	90.4083	84.5183	1.06969
1	MIA PaCa2	D13_2	0.01	1_D13_2_131	S	22	2	20	0.333333	88.7667	88.7667	82.9015	1.07075
1	MIA PaCa2	D13_2	0.01	1_D13_2_131	S	23	3	30	0.5	88.9964	88.9964	82.0655	1.08446
1	MIA PaCa2	D13_2	0.01	1_D13_2_131	S	24	4	40	0.666667	89.8259	89.8259	80.9707	1.10936
1	MIA PaCa2	D13_2	0.01	1_D13_2_131	S	25	5	50	0.833333	88.3736	88.3736	80.691	1.09521
1	MIA PaCa2	D13_2	0.01	1_D13_2_131	S	26	6	60	1	88.8784	88.8784	79.6097	1.11643
1	MIA PaCa2	D13_2	0.01	1_D13_2_131	S	27	7	70	1.16667	85.7546	85.7546	79.1117	1.08397
1	MIA PaCa2	D13_2	0.01	1_D13_2_131	S	28	8	80	1.33333	83.0481	83.0481	78.0016	1.0647
1	MIA PaCa2	D13_2	0.01	1_D13_2_131	S	29	9	90	1.5	85.1754	85.1754	77.8528	1.09406
1	MIA PaCa2	D13_2	0.01	1_D13_2_131	S	31	11	110	1.83333	87.8484	87.8484	77.1169	1.13916
1	MIA PaCa2	D13_2	0.01	1_D13_2_131	S	32	12	120	2	89.5629	89.5629	76.7701	1.16664
1	MIA PaCa2	D13_2	0.01	1_D13_2_131	S	33	13	130	2.16667	89.4128	89.4128	75.9843	1.17673
1	MIA PaCa2	D13_2	0.01	1_D13_2_131	S	34	14	140	2.33333	94.5102	94.5102	75.0842	1.25872
1	MIA PaCa2	D13_2	0.01	1_D13_2_131	S	35	15	150	2.5	87.2847	87.2847	75.707	1.15293
1	MIA PaCa2	D13_2	0.01	1_D13_2_131	S	36	16	160	2.66667	89.053	89.053	74.2775	1.19892
1	MIA PaCa2	D13_2	0.01	1_D13_2_131	S	37	17	170	2.83333	81.2779	81.2779	73.2738	1.10923
1	MIA PaCa2	D13_2	0.01	1_D13_2_131	S	38	18	180	3	78.1388	78.1388	73.1743	1.06785
1	MIA PaCa2	D13_2	0.01	1_D13_2_131	S	39	19	190	3.16667	78.5054	78.5054	72.5019	1.0828
1	MIA PaCa2	D13_2	0.01	1_D13_2_131	S	40	20	200	3.33333	79.0309	79.0309	71.7669	1.10122
1	MIA PaCa2	D13_2	0.01	1_D13_2_131	S	41	21	210	3.5	90.485	90.485	72.0161	1.25645
1	MIA PaCa2	D13_2	0.01	1_D13_2_131	S	42	22	220	3.66667	85.0921	85.0921	71.8185	1.18482
1	MIA PaCa2	D13_2	0.01	1_D13_2_131	S	43	23	230	3.83333	82.2073	82.2073	71.1314	1.15571
1	MIA PaCa2	D13_2	0.01	1_D13_2_131	S	44	24	240	4	78.0846	78.0846	70.5922	1.10614
1	MIA PaCa2	D13_2	0.01	1_D13_2_131	S	45	25	250	4.16667	78.1376	78.1376	70.3088	1.11135
1	MIA PaCa2	D13_2	0.01	1_D13_2_131	S	46	26	260	4.33333	80.9472	80.9472	70.5953	1.14664
1	MIA PaCa2	D13_2	0.01	1_D13_2_131	S	47	27	270	4.5	89.8571	89.8571	70.0862	1.28209
1	MIA PaCa2	D13_2	0.01	1_D13_2_131	S	48	28	280	4.66667	82.1491	82.1491	69.4746	1.18243
1	MIA PaCa2	D13_2	0.01	1_D13_2_131	S	49	29	290	4.83333	81.1512	81.1512	68.6304	1.18244
1	MIA PaCa2	D13_2	0.01	1_D13_2_131	S	50	30	300	5	80.8302	80.8302	68.8548	1.17392
1	MIA PaCa2	D13_2	0.01	1_D13_2_131	S	51	31	310	5.16667	80.2941	80.2941	68.1679	1.17789
1	MIA PaCa2	D13_2	0.01	1_D13_2_131	S	52	32	320	5.33333	82.7792	82.7792	67.3507	1.22908
1	MIA PaCa2	D13_2	0.01	1_D13_2_131	S	53	33	330	5.5	79.1667	79.1667	67.9219	1.16555
1	MIA PaCa2	D13_2	0.01	1_D13_2_131	S	54	34	340	5.66667	79.788	79.788	68.0349	1.17275
1	MIA PaCa2	D13_2	0.01	1_D13_2_131	S	55	35	350	5.83333	75.0227	75.0227	68.887	1.08907
1	MIA PaCa2	D13_2	0.01	1_D13_2_131	S	56	36	360	6	77.95	77.95	68.1633	1.14358
1	MIA PaCa2	D13_2	0.01	1_D13_2_131	S	57	37	370	6.16667	83.7123	83.7123	67.2471	1.24485
1	MIA PaCa2	D13_2	0.01	1_D13_2_131	S	58	38	380	6.33333	79.3922	79.3922	67.1163	1.18291
1	MIA PaCa2	D13_2	0.01	1_D13_2_131	S	59	39	390	6.5	72.5299	72.5299	66.9979	1.08257
1	MIA PaCa2	D13_2	0.01	1_D13_2_131	S	60	40	400	6.66667	72.3666	72.3666	66.8466	1.08258
1	MIA PaCa2	D13_2	0.01	1_D13_2_131	S	61	41	410	6.83333	72.9528	72.9528	66.872	1.09093
1	MIA PaCa2	D13_2	0.01	1_D13_2_131	S	62	42	420	7	70.4873	70.4873	67.4151	1.04557
1	MIA PaCa2	D13_2	0.01	1_D13_2_131	S	63	43	430	7.16667	76.5215	76.5215	66.593	1.14909
1	MIA PaCa2	D13_2	0.01	1_D13_2_131	S	64	44	440	7.33333	68.6754	68.6754	64.9413	1.0575
1	MIA PaCa2	D13_2	0.01	1_D13_2_131	S	65	45	450	7.5	69.6311	69.6311	65.8821	1.0569
1	MIA PaCa2	D13_2	0.01	1_D13_2_131	S	66	46	460	7.66667	68.3284	68.3284	65.7717	1.03887
1	MIA PaCa2	D13_2	0.01	1_D13_2_131	S	67	47	470	7.83333	76.5805	76.5805	65.9693	1.16085
1	MIA PaCa2	D13_2	0.01	1_D13_2_131	S	68	48	480	8	71.941	71.941	65.2461	1.10261
1	MIA PaCa2	D13_2	0.01	1_D13_2_131	S	69	49	490	8.16667	70.8346	70.8346	64.9541	1.09053
1	MIA PaCa2	D13_2	0.01	1_D13_2_131	S	70	50	500	8.33333	71.9934	71.9934	64.7238	1.11232
1	MIA PaCa2	D13_2	0.01	1_D13_2_131	S	71	51	510	8.5	73.2298	73.2298	64.8745	1.12879
1	MIA PaCa2	D13_2	0.01	1_D13_2_131	S	72	52	520	8.66667	67.4359	67.4359	65.0075	1.03736
1	MIA PaCa2	D13_2	0.01	1_D13_2_131	S	73	53	530	8.83333	72.4573	72.4573	64.3036	1.1268
1	MIA PaCa2	D13_2	0.01	1_D13_2_131	S	74	54	540	9	67.8775	67.8775	64.0165	1.06031
1	MIA PaCa2	D13_2	0.01	1_D13_2_131	S	75	55	550	9.16667	67.5369	67.5369	64.712	1.04365
1	MIA PaCa2	D13_2	0.01	1_D13_2_131	S	76	56	560	9.33333	68.2662	68.2662	64.0422	1.06596
1	MIA PaCa2	D13_2	0.01	1_D13_2_131	S	77	57	570	9.5	69.4831	69.4831	63.8764	1.08777
1	MIA PaCa2	D13_2	0.01	1_D13_2_131	S	78	58	580	9.66667	67.3045	67.3045	63.7423	1.05588
1	MIA PaCa2	D13_2	0.01	1_D13_2_131	S	79	59	590	9.83333	68.2783	68.2783	63.4249	1.07652
1	MIA PaCa2	D13_2	0.01	1_D13_2_131	S	80	60	600	10	67.2154	67.2154	63.1512	1.06436
1	MIA PaCa2	D13_2	0.01	1_D13_2_131	S	81	61	610	10.1667	68.3553	68.3553	63.2666	1.08043
1	MIA PaCa2	D13_2	0.01	1_D13_2_131	S	82	62	620	10.3333	69.7522	69.7522	62.8471	1.10987
1	MIA PaCa2	D13_2	0.01	1_D13_2_133	S	9	-11	-110	-1.83333	104.168	104.168	88.8498	1.17241
1	MIA PaCa2	D13_2	0.01	1_D13_2_133	S	10	-10	-100	-1.66667	101.026	101.026	88.0257	1.14769
1	MIA PaCa2	D13_2	0.01	1_D13_2_133	S	11	-9	-90	-1.5	97.2603	97.2603	87.39	1.11295
1	MIA PaCa2	D13_2	0.01	1_D13_2_133	S	12	-8	-80	-1.33333	93.524	93.524	86.2825	1.08393
1	MIA PaCa2	D13_2	0.01	1_D13_2_133	S	13	-7	-70	-1.16667	87.1149	87.1149	84.872	1.02643
1	MIA PaCa2	D13_2	0.01	1_D13_2_133	S	14	-6	-60	-1	88.7301	88.7301	85.6506	1.03595
1	MIA PaCa2	D13_2	0.01	1_D13_2_133	S	15	-5	-50	-0.833333	92.0452	92.0452	84.1405	1.09395
1	MIA PaCa2	D13_2	0.01	1_D13_2_133	S	16	-4	-40	-0.666667	86.5	86.5	82.5286	1.04812
1	MIA PaCa2	D13_2	0.01	1_D13_2_133	S	17	-3	-30	-0.5	86.1107	86.1107	83.098	1.03625
1	MIA PaCa2	D13_2	0.01	1_D13_2_133	S	18	-2	-20	-0.333333	84.6324	84.6324	82.7797	1.02238
1	MIA PaCa2	D13_2	0.01	1_D13_2_133	S	19	-1	-10	-0.166667	82.0757	82.0757	82.0129	1.00077
1	MIA PaCa2	D13_2	0.01	1_D13_2_133	S	20	0	0	0	83.312	83.312	81.1847	1.0262
1	MIA PaCa2	D13_2	0.01	1_D13_2_133	S	21	1	10	0.166667	86	86	84.5183	1.01753
1	MIA PaCa2	D13_2	0.01	1_D13_2_133	S	22	2	20	0.333333	85.8821	85.8821	82.9015	1.03595
1	MIA PaCa2	D13_2	0.01	1_D13_2_133	S	23	3	30	0.5	86.1028	86.1028	82.0655	1.0492
1	MIA PaCa2	D13_2	0.01	1_D13_2_133	S	24	4	40	0.666667	88.7683	88.7683	80.9707	1.0963
1	MIA PaCa2	D13_2	0.01	1_D13_2_133	S	25	5	50	0.833333	89.1667	89.1667	80.691	1.10504
1	MIA PaCa2	D13_2	0.01	1_D13_2_133	S	26	6	60	1	88.4964	88.4964	79.6097	1.11163
1	MIA PaCa2	D13_2	0.01	1_D13_2_133	S	27	7	70	1.16667	88.5393	88.5393	79.1117	1.11917
1	MIA PaCa2	D13_2	0.01	1_D13_2_133	S	28	8	80	1.33333	88.3195	88.3195	78.0016	1.13228
1	MIA PaCa2	D13_2	0.01	1_D13_2_133	S	29	9	90	1.5	93.461	93.461	77.8528	1.20048
1	MIA PaCa2	D13_2	0.01	1_D13_2_133	S	31	11	110	1.83333	88.4422	88.4422	77.1169	1.14686
1	MIA PaCa2	D13_2	0.01	1_D13_2_133	S	32	12	120	2	92.8761	92.8761	76.7701	1.2098
1	MIA PaCa2	D13_2	0.01	1_D13_2_133	S	33	13	130	2.16667	82.9586	82.9586	75.9843	1.09179
1	MIA PaCa2	D13_2	0.01	1_D13_2_133	S	34	14	140	2.33333	86.0669	86.0669	75.0842	1.14627
1	MIA PaCa2	D13_2	0.01	1_D13_2_133	S	35	15	150	2.5	85.4554	85.4554	75.707	1.12877
1	MIA PaCa2	D13_2	0.01	1_D13_2_133	S	36	16	160	2.66667	83.7699	83.7699	74.2775	1.1278
1	MIA PaCa2	D13_2	0.01	1_D13_2_133	S	37	17	170	2.83333	90.5543	90.5543	73.2738	1.23583
1	MIA PaCa2	D13_2	0.01	1_D13_2_133	S	38	18	180	3	82.4749	82.4749	73.1743	1.1271
1	MIA PaCa2	D13_2	0.01	1_D13_2_133	S	39	19	190	3.16667	82.1277	82.1277	72.5019	1.13277
1	MIA PaCa2	D13_2	0.01	1_D13_2_133	S	40	20	200	3.33333	80.3218	80.3218	71.7669	1.1192
1	MIA PaCa2	D13_2	0.01	1_D13_2_133	S	41	21	210	3.5	88.1851	88.1851	72.0161	1.22452
1	MIA PaCa2	D13_2	0.01	1_D13_2_133	S	42	22	220	3.66667	84.9121	84.9121	71.8185	1.18231
1	MIA PaCa2	D13_2	0.01	1_D13_2_133	S	43	23	230	3.83333	82.1167	82.1167	71.1314	1.15444
1	MIA PaCa2	D13_2	0.01	1_D13_2_133	S	44	24	240	4	80.5504	80.5504	70.5922	1.14107
1	MIA PaCa2	D13_2	0.01	1_D13_2_133	S	45	25	250	4.16667	78.1565	78.1565	70.3088	1.11162
1	MIA PaCa2	D13_2	0.01	1_D13_2_133	S	46	26	260	4.33333	75.9352	75.9352	70.5953	1.07564
1	MIA PaCa2	D13_2	0.01	1_D13_2_133	S	47	27	270	4.5	75.323	75.323	70.0862	1.07472
1	MIA PaCa2	D13_2	0.01	1_D13_2_133	S	48	28	280	4.66667	74.8159	74.8159	69.4746	1.07688
1	MIA PaCa2	D13_2	0.01	1_D13_2_133	S	49	29	290	4.83333	76.1321	76.1321	68.6304	1.10931
1	MIA PaCa2	D13_2	0.01	1_D13_2_133	S	50	30	300	5	76.6613	76.6613	68.8548	1.11338
1	MIA PaCa2	D13_2	0.01	1_D13_2_133	S	51	31	310	5.16667	79.8456	79.8456	68.1679	1.17131
1	MIA PaCa2	D13_2	0.01	1_D13_2_133	S	52	32	320	5.33333	80.009	80.009	67.3507	1.18795
1	MIA PaCa2	D13_2	0.01	1_D13_2_133	S	53	33	330	5.5	76.1914	76.1914	67.9219	1.12175
1	MIA PaCa2	D13_2	0.01	1_D13_2_133	S	54	34	340	5.66667	78.2883	78.2883	68.0349	1.15071
1	MIA PaCa2	D13_2	0.01	1_D13_2_133	S	55	35	350	5.83333	76.9351	76.9351	68.887	1.11683
1	MIA PaCa2	D13_2	0.01	1_D13_2_133	S	56	36	360	6	76.2455	76.2455	68.1633	1.11857
1	MIA PaCa2	D13_2	0.01	1_D13_2_133	S	57	37	370	6.16667	77.5367	77.5367	67.2471	1.15301
1	MIA PaCa2	D13_2	0.01	1_D13_2_133	S	58	38	380	6.33333	75.2192	75.2192	67.1163	1.12073
1	MIA PaCa2	D13_2	0.01	1_D13_2_133	S	59	39	390	6.5	81.0414	81.0414	66.9979	1.20961
1	MIA PaCa2	D13_2	0.01	1_D13_2_133	S	60	40	400	6.66667	83.2281	83.2281	66.8466	1.24506
1	MIA PaCa2	D13_2	0.01	1_D13_2_133	S	61	41	410	6.83333	83.5586	83.5586	66.872	1.24953
1	MIA PaCa2	D13_2	0.01	1_D13_2_133	S	62	42	420	7	79.9505	79.9505	67.4151	1.18594
1	MIA PaCa2	D13_2	0.01	1_D13_2_133	S	63	43	430	7.16667	75.9461	75.9461	66.593	1.14045
1	MIA PaCa2	D13_2	0.01	1_D13_2_133	S	64	44	440	7.33333	73.5484	73.5484	64.9413	1.13254
1	MIA PaCa2	D13_2	0.01	1_D13_2_133	S	65	45	450	7.5	76.5552	76.5552	65.8821	1.162
1	MIA PaCa2	D13_2	0.01	1_D13_2_133	S	66	46	460	7.66667	73.6367	73.6367	65.7717	1.11958
1	MIA PaCa2	D13_2	0.01	1_D13_2_133	S	67	47	470	7.83333	70.8235	70.8235	65.9693	1.07358
1	MIA PaCa2	D13_2	0.01	1_D13_2_133	S	68	48	480	8	70.498	70.498	65.2461	1.08049
1	MIA PaCa2	D13_2	0.01	1_D13_2_133	S	69	49	490	8.16667	71.644	71.644	64.9541	1.10299
1	MIA PaCa2	D13_2	0.01	1_D13_2_133	S	70	50	500	8.33333	71.6203	71.6203	64.7238	1.10655
1	MIA PaCa2	D13_2	0.01	1_D13_2_133	S	71	51	510	8.5	71.3023	71.3023	64.8745	1.09908
1	MIA PaCa2	D13_2	0.01	1_D13_2_133	S	72	52	520	8.66667	70.3769	70.3769	65.0075	1.0826
1	MIA PaCa2	D13_2	0.01	1_D13_2_133	S	73	53	530	8.83333	72.1296	72.1296	64.3036	1.1217
1	MIA PaCa2	D13_2	0.01	1_D13_2_133	S	74	54	540	9	81.8685	81.8685	64.0165	1.27887
1	MIA PaCa2	D13_2	0.01	1_D13_2_133	S	75	55	550	9.16667	81.0418	81.0418	64.712	1.25235
1	MIA PaCa2	D13_2	0.01	1_D13_2_133	S	76	56	560	9.33333	71.1523	71.1523	64.0422	1.11102
1	MIA PaCa2	D13_2	0.01	1_D13_2_133	S	77	57	570	9.5	71.2244	71.2244	63.8764	1.11503
1	MIA PaCa2	D13_2	0.01	1_D13_2_27	S	1	-19	-190	-3.16667	113.158	113.158	98.9025	1.14414
1	MIA PaCa2	D13_2	0.01	1_D13_2_27	S	2	-18	-180	-3	110.681	110.681	98.287	1.1261
1	MIA PaCa2	D13_2	0.01	1_D13_2_27	S	3	-17	-170	-2.83333	106.572	106.572	95.5639	1.11519
1	MIA PaCa2	D13_2	0.01	1_D13_2_27	S	4	-16	-160	-2.66667	106.611	106.611	94.8279	1.12426
1	MIA PaCa2	D13_2	0.01	1_D13_2_27	S	5	-15	-150	-2.5	108.34	108.34	93.7282	1.1559
1	MIA PaCa2	D13_2	0.01	1_D13_2_27	S	6	-14	-140	-2.33333	105.973	105.973	91.2043	1.16193
1	MIA PaCa2	D13_2	0.01	1_D13_2_27	S	7	-13	-130	-2.16667	104.28	104.28	91.0398	1.14543
1	MIA PaCa2	D13_2	0.01	1_D13_2_27	S	8	-12	-120	-2	102.894	102.894	89.9628	1.14374
1	MIA PaCa2	D13_2	0.01	1_D13_2_27	S	9	-11	-110	-1.83333	104.331	104.331	88.8498	1.17424
1	MIA PaCa2	D13_2	0.01	1_D13_2_27	S	10	-10	-100	-1.66667	108.176	108.176	88.0257	1.22891
1	MIA PaCa2	D13_2	0.01	1_D13_2_27	S	11	-9	-90	-1.5	108.265	108.265	87.39	1.23887
1	MIA PaCa2	D13_2	0.01	1_D13_2_27	S	12	-8	-80	-1.33333	102.635	102.635	86.2825	1.18952
1	MIA PaCa2	D13_2	0.01	1_D13_2_27	S	13	-7	-70	-1.16667	95.8478	95.8478	84.872	1.12932
1	MIA PaCa2	D13_2	0.01	1_D13_2_27	S	14	-6	-60	-1	100.578	100.578	85.6506	1.17429
1	MIA PaCa2	D13_2	0.01	1_D13_2_27	S	15	-5	-50	-0.833333	96.2653	96.2653	84.1405	1.1441
1	MIA PaCa2	D13_2	0.01	1_D13_2_27	S	16	-4	-40	-0.666667	98.885	98.885	82.5286	1.19819
1	MIA PaCa2	D13_2	0.01	1_D13_2_27	S	17	-3	-30	-0.5	98.4621	98.4621	83.098	1.18489
1	MIA PaCa2	D13_2	0.01	1_D13_2_27	S	18	-2	-20	-0.333333	101.785	101.785	82.7797	1.22959
1	MIA PaCa2	D13_2	0.01	1_D13_2_27	S	19	-1	-10	-0.166667	96.8027	96.8027	82.0129	1.18034
1	MIA PaCa2	D13_2	0.01	1_D13_2_27	S	20	0	0	0	96.8449	96.8449	81.1847	1.1929
1	MIA PaCa2	D13_2	0.01	1_D13_2_27	S	21	1	10	0.166667	96.7775	96.7775	84.5183	1.14505
1	MIA PaCa2	D13_2	0.01	1_D13_2_27	S	22	2	20	0.333333	96.1792	96.1792	82.9015	1.16016
1	MIA PaCa2	D13_2	0.01	1_D13_2_27	S	23	3	30	0.5	95.927	95.927	82.0655	1.16891
1	MIA PaCa2	D13_2	0.01	1_D13_2_27	S	24	4	40	0.666667	96.5057	96.5057	80.9707	1.19186
1	MIA PaCa2	D13_2	0.01	1_D13_2_27	S	25	5	50	0.833333	98.5684	98.5684	80.691	1.22155
1	MIA PaCa2	D13_2	0.01	1_D13_2_27	S	26	6	60	1	99.7759	99.7759	79.6097	1.25331
1	MIA PaCa2	D13_2	0.01	1_D13_2_27	S	27	7	70	1.16667	100.035	100.035	79.1117	1.26448
1	MIA PaCa2	D13_2	0.01	1_D13_2_27	S	28	8	80	1.33333	101.528	101.528	78.0016	1.30161
1	MIA PaCa2	D13_2	0.01	1_D13_2_27	S	29	9	90	1.5	97.7371	97.7371	77.8528	1.25541
1	MIA PaCa2	D13_2	0.01	1_D13_2_27	S	30	10	100	1.66667	98.7647	98.7647	77.6698	1.2716
1	MIA PaCa2	D13_2	0.01	1_D13_2_27	S	31	11	110	1.83333	96.3152	96.3152	77.1169	1.24895
1	MIA PaCa2	D13_2	0.01	1_D13_2_27	S	32	12	120	2	96.022	96.022	76.7701	1.25077
1	MIA PaCa2	D13_2	0.01	1_D13_2_27	S	33	13	130	2.16667	97.7642	97.7642	75.9843	1.28664
1	MIA PaCa2	D13_2	0.01	1_D13_2_27	S	34	14	140	2.33333	95.6585	95.6585	75.0842	1.27402
1	MIA PaCa2	D13_2	0.01	1_D13_2_27	S	35	15	150	2.5	94.9146	94.9146	75.707	1.25371
1	MIA PaCa2	D13_2	0.01	1_D13_2_27	S	36	16	160	2.66667	88.1736	88.1736	74.2775	1.18708
1	MIA PaCa2	D13_2	0.01	1_D13_2_27	S	37	17	170	2.83333	88.3107	88.3107	73.2738	1.20521
1	MIA PaCa2	D13_2	0.01	1_D13_2_27	S	38	18	180	3	90.8795	90.8795	73.1743	1.24196
1	MIA PaCa2	D13_2	0.01	1_D13_2_27	S	39	19	190	3.16667	94.4144	94.4144	72.5019	1.30223
1	MIA PaCa2	D13_2	0.01	1_D13_2_27	S	40	20	200	3.33333	93.8017	93.8017	71.7669	1.30703
1	MIA PaCa2	D13_2	0.01	1_D13_2_27	S	41	21	210	3.5	89.0567	89.0567	72.0161	1.23662
1	MIA PaCa2	D13_2	0.01	1_D13_2_27	S	42	22	220	3.66667	90.3456	90.3456	71.8185	1.25797
1	MIA PaCa2	D13_2	0.01	1_D13_2_27	S	43	23	230	3.83333	88.022	88.022	71.1314	1.23746
1	MIA PaCa2	D13_2	0.01	1_D13_2_27	S	44	24	240	4	88.1313	88.1313	70.5922	1.24846
1	MIA PaCa2	D13_2	0.01	1_D13_2_27	S	45	25	250	4.16667	89.7367	89.7367	70.3088	1.27632
1	MIA PaCa2	D13_2	0.01	1_D13_2_27	S	46	26	260	4.33333	87.7826	87.7826	70.5953	1.24346
1	MIA PaCa2	D13_2	0.01	1_D13_2_27	S	47	27	270	4.5	89.1671	89.1671	70.0862	1.27225
1	MIA PaCa2	D13_2	0.01	1_D13_2_27	S	48	28	280	4.66667	88.848	88.848	69.4746	1.27886
1	MIA PaCa2	D13_2	0.01	1_D13_2_27	S	49	29	290	4.83333	91.7944	91.7944	68.6304	1.33752
1	MIA PaCa2	D13_2	0.01	1_D13_2_27	S	50	30	300	5	90.8251	90.8251	68.8548	1.31908
1	MIA PaCa2	D13_2	0.01	1_D13_2_27	S	51	31	310	5.16667	88.0853	88.0853	68.1679	1.29218
1	MIA PaCa2	D13_2	0.01	1_D13_2_27	S	52	32	320	5.33333	88.2257	88.2257	67.3507	1.30995
1	MIA PaCa2	D13_2	0.01	1_D13_2_27	S	53	33	330	5.5	83.7429	83.7429	67.9219	1.23293
1	MIA PaCa2	D13_2	0.01	1_D13_2_27	S	54	34	340	5.66667	86.5176	86.5176	68.0349	1.27166
1	MIA PaCa2	D13_2	0.01	1_D13_2_27	S	55	35	350	5.83333	85.8537	85.8537	68.887	1.2463
1	MIA PaCa2	D13_2	0.01	1_D13_2_27	S	56	36	360	6	83.2396	83.2396	68.1633	1.22118
1	MIA PaCa2	D13_2	0.01	1_D13_2_27	S	57	37	370	6.16667	85.7538	85.7538	67.2471	1.2752
1	MIA PaCa2	D13_2	0.01	1_D13_2_27	S	58	38	380	6.33333	85.1831	85.1831	67.1163	1.26919
1	MIA PaCa2	D13_2	0.01	1_D13_2_27	S	59	39	390	6.5	86.4534	86.4534	66.9979	1.29039
1	MIA PaCa2	D13_2	0.01	1_D13_2_27	S	60	40	400	6.66667	86.2823	86.2823	66.8466	1.29075
1	MIA PaCa2	D13_2	0.01	1_D13_2_27	S	61	41	410	6.83333	88.997	88.997	66.872	1.33086
1	MIA PaCa2	D13_2	0.01	1_D13_2_27	S	62	42	420	7	90.6054	90.6054	67.4151	1.34399
1	MIA PaCa2	D13_2	0.01	1_D13_2_27	S	63	43	430	7.16667	88.4174	88.4174	66.593	1.32773
1	MIA PaCa2	D13_2	0.01	1_D13_2_27	S	64	44	440	7.33333	87.5045	87.5045	64.9413	1.34744
1	MIA PaCa2	D13_2	0.01	1_D13_2_27	S	65	45	450	7.5	87.8433	87.8433	65.8821	1.33334
1	MIA PaCa2	D13_2	0.01	1_D13_2_27	S	66	46	460	7.66667	86.4082	86.4082	65.7717	1.31376
1	MIA PaCa2	D13_2	0.01	1_D13_2_27	S	67	47	470	7.83333	85.5096	85.5096	65.9693	1.2962
1	MIA PaCa2	D13_2	0.01	1_D13_2_28	S	0	-20	-200	-3.33333	118.618	118.618	102.696	1.15504
1	MIA PaCa2	D13_2	0.01	1_D13_2_28	S	1	-19	-190	-3.16667	112.772	112.772	98.9025	1.14023
1	MIA PaCa2	D13_2	0.01	1_D13_2_28	S	4	-16	-160	-2.66667	108.616	108.616	94.8279	1.1454
1	MIA PaCa2	D13_2	0.01	1_D13_2_28	S	5	-15	-150	-2.5	107.557	107.557	93.7282	1.14755
1	MIA PaCa2	D13_2	0.01	1_D13_2_28	S	6	-14	-140	-2.33333	106.916	106.916	91.2043	1.17227
1	MIA PaCa2	D13_2	0.01	1_D13_2_28	S	7	-13	-130	-2.16667	105.866	105.866	91.0398	1.16285
1	MIA PaCa2	D13_2	0.01	1_D13_2_28	S	8	-12	-120	-2	103.728	103.728	89.9628	1.15301
1	MIA PaCa2	D13_2	0.01	1_D13_2_28	S	9	-11	-110	-1.83333	109.652	109.652	88.8498	1.23412
1	MIA PaCa2	D13_2	0.01	1_D13_2_28	S	10	-10	-100	-1.66667	108.095	108.095	88.0257	1.22799
1	MIA PaCa2	D13_2	0.01	1_D13_2_28	S	11	-9	-90	-1.5	106.815	106.815	87.39	1.22228
1	MIA PaCa2	D13_2	0.01	1_D13_2_28	S	12	-8	-80	-1.33333	104.869	104.869	86.2825	1.21542
1	MIA PaCa2	D13_2	0.01	1_D13_2_28	S	13	-7	-70	-1.16667	104.039	104.039	84.872	1.22583
1	MIA PaCa2	D13_2	0.01	1_D13_2_28	S	14	-6	-60	-1	104.731	104.731	85.6506	1.22278
1	MIA PaCa2	D13_2	0.01	1_D13_2_28	S	15	-5	-50	-0.833333	107.012	107.012	84.1405	1.27182
1	MIA PaCa2	D13_2	0.01	1_D13_2_28	S	16	-4	-40	-0.666667	97.4009	97.4009	82.5286	1.18021
1	MIA PaCa2	D13_2	0.01	1_D13_2_28	S	17	-3	-30	-0.5	96.0195	96.0195	83.098	1.1555
1	MIA PaCa2	D13_2	0.01	1_D13_2_28	S	18	-2	-20	-0.333333	97.4156	97.4156	82.7797	1.17681
1	MIA PaCa2	D13_2	0.01	1_D13_2_28	S	19	-1	-10	-0.166667	88.9	88.9	82.0129	1.08398
1	MIA PaCa2	D13_2	0.01	1_D13_2_28	S	20	0	0	0	91.249	91.249	81.1847	1.12397
1	MIA PaCa2	D13_2	0.01	1_D13_2_28	S	21	1	10	0.166667	97.7539	97.7539	84.5183	1.1566
1	MIA PaCa2	D13_2	0.01	1_D13_2_28	S	22	2	20	0.333333	92.4173	92.4173	82.9015	1.11478
1	MIA PaCa2	D13_2	0.01	1_D13_2_28	S	23	3	30	0.5	93.052	93.052	82.0655	1.13387
1	MIA PaCa2	D13_2	0.01	1_D13_2_28	S	24	4	40	0.666667	87.3514	87.3514	80.9707	1.0788
1	MIA PaCa2	D13_2	0.01	1_D13_2_28	S	25	5	50	0.833333	88.738	88.738	80.691	1.09973
1	MIA PaCa2	D13_2	0.01	1_D13_2_28	S	26	6	60	1	93.2885	93.2885	79.6097	1.17182
1	MIA PaCa2	D13_2	0.01	1_D13_2_28	S	27	7	70	1.16667	89.8731	89.8731	79.1117	1.13603
1	MIA PaCa2	D13_2	0.01	1_D13_2_28	S	28	8	80	1.33333	86.969	86.969	78.0016	1.11496
1	MIA PaCa2	D13_2	0.01	1_D13_2_28	S	29	9	90	1.5	83.2147	83.2147	77.8528	1.06887
1	MIA PaCa2	D13_2	0.01	1_D13_2_28	S	30	10	100	1.66667	84.2981	84.2981	77.6698	1.08534
1	MIA PaCa2	D13_2	0.01	1_D13_2_28	S	31	11	110	1.83333	82.6076	82.6076	77.1169	1.0712
1	MIA PaCa2	D13_2	0.01	1_D13_2_28	S	32	12	120	2	82.8944	82.8944	76.7701	1.07977
1	MIA PaCa2	D13_2	0.01	1_D13_2_28	S	33	13	130	2.16667	84.3654	84.3654	75.9843	1.1103
1	MIA PaCa2	D13_2	0.01	1_D13_2_28	S	34	14	140	2.33333	82.1314	82.1314	75.0842	1.09386
1	MIA PaCa2	D13_2	0.01	1_D13_2_28	S	35	15	150	2.5	81.0533	81.0533	75.707	1.07062
1	MIA PaCa2	D13_2	0.01	1_D13_2_28	S	36	16	160	2.66667	78.4663	78.4663	74.2775	1.05639
1	MIA PaCa2	D13_2	0.01	1_D13_2_28	S	37	17	170	2.83333	78.8313	78.8313	73.2738	1.07584
1	MIA PaCa2	D13_2	0.01	1_D13_2_28	S	38	18	180	3	77.7994	77.7994	73.1743	1.06321
1	MIA PaCa2	D13_2	0.01	1_D13_2_28	S	39	19	190	3.16667	76.9248	76.9248	72.5019	1.061
1	MIA PaCa2	D13_2	0.01	1_D13_2_28	S	40	20	200	3.33333	76.4338	76.4338	71.7669	1.06503
1	MIA PaCa2	D13_2	0.01	1_D13_2_28	S	41	21	210	3.5	75.1506	75.1506	72.0161	1.04352
1	MIA PaCa2	D13_2	0.01	1_D13_2_28	S	42	22	220	3.66667	76.3468	76.3468	71.8185	1.06305
1	MIA PaCa2	D13_2	0.01	1_D13_2_28	S	43	23	230	3.83333	74.7575	74.7575	71.1314	1.05098
1	MIA PaCa2	D13_2	0.01	1_D13_2_28	S	44	24	240	4	72.6411	72.6411	70.5922	1.02902
1	MIA PaCa2	D13_2	0.01	1_D13_2_28	S	45	25	250	4.16667	71.7308	71.7308	70.3088	1.02022
1	MIA PaCa2	D13_2	0.01	1_D13_2_28	S	46	26	260	4.33333	72.0057	72.0057	70.5953	1.01998
1	MIA PaCa2	D13_2	0.01	1_D13_2_28	S	47	27	270	4.5	75.3879	75.3879	70.0862	1.07565
1	MIA PaCa2	D13_2	0.01	1_D13_2_28	S	48	28	280	4.66667	73.6011	73.6011	69.4746	1.0594
1	MIA PaCa2	D13_2	0.01	1_D13_2_28	S	49	29	290	4.83333	71.1074	71.1074	68.6304	1.03609
1	MIA PaCa2	D13_2	0.01	1_D13_2_28	S	50	30	300	5	70.1934	70.1934	68.8548	1.01944
1	MIA PaCa2	D13_2	0.01	1_D13_2_28	S	51	31	310	5.16667	71.3198	71.3198	68.1679	1.04624
1	MIA PaCa2	D13_2	0.01	1_D13_2_28	S	52	32	320	5.33333	69.824	69.824	67.3507	1.03672
1	MIA PaCa2	D13_2	0.01	1_D13_2_28	S	53	33	330	5.5	72.8701	72.8701	67.9219	1.07285
1	MIA PaCa2	D13_2	0.01	1_D13_2_28	S	54	34	340	5.66667	73.169	73.169	68.0349	1.07546
1	MIA PaCa2	D13_2	0.01	1_D13_2_28	S	55	35	350	5.83333	74.1866	74.1866	68.887	1.07693
1	MIA PaCa2	D13_2	0.01	1_D13_2_28	S	56	36	360	6	70.9619	70.9619	68.1633	1.04106
1	MIA PaCa2	D13_2	0.01	1_D13_2_28	S	57	37	370	6.16667	73.7428	73.7428	67.2471	1.09659
1	MIA PaCa2	D13_2	0.01	1_D13_2_28	S	58	38	380	6.33333	71.1145	71.1145	67.1163	1.05957
1	MIA PaCa2	D13_2	0.01	1_D13_2_28	S	59	39	390	6.5	71.8994	71.8994	66.9979	1.07316
1	MIA PaCa2	D13_2	0.01	1_D13_2_28	S	60	40	400	6.66667	70.5764	70.5764	66.8466	1.0558
1	MIA PaCa2	D13_2	0.01	1_D13_2_28	S	61	41	410	6.83333	70.1617	70.1617	66.872	1.04919
1	MIA PaCa2	D13_2	0.01	1_D13_2_28	S	62	42	420	7	72.0469	72.0469	67.4151	1.06871
1	MIA PaCa2	D13_2	0.01	1_D13_2_28	S	63	43	430	7.16667	69.4425	69.4425	66.593	1.04279
1	MIA PaCa2	D13_2	0.01	1_D13_2_28	S	64	44	440	7.33333	67.5135	67.5135	64.9413	1.03961
1	MIA PaCa2	D13_2	0.01	1_D13_2_28	S	65	45	450	7.5	69.0312	69.0312	65.8821	1.0478
1	MIA PaCa2	D13_2	0.01	1_D13_2_28	S	66	46	460	7.66667	68.7115	68.7115	65.7717	1.0447
1	MIA PaCa2	D13_2	0.01	1_D13_2_28	S	67	47	470	7.83333	69.7741	69.7741	65.9693	1.05768
1	MIA PaCa2	D13_2	0.01	1_D13_2_28	S	68	48	480	8	70.9567	70.9567	65.2461	1.08752
1	MIA PaCa2	D13_2	0.01	1_D13_2_28	S	69	49	490	8.16667	70.3474	70.3474	64.9541	1.08303
1	MIA PaCa2	D13_2	0.01	1_D13_2_28	S	70	50	500	8.33333	67.0689	67.0689	64.7238	1.03623
1	MIA PaCa2	D13_2	0.01	1_D13_2_28	S	71	51	510	8.5	66.3391	66.3391	64.8745	1.02258
1	MIA PaCa2	D13_2	0.01	1_D13_2_28	S	72	52	520	8.66667	67.288	67.288	65.0075	1.03508
1	MIA PaCa2	D13_2	0.01	1_D13_2_28	S	73	53	530	8.83333	75.0181	75.0181	64.3036	1.16662
1	MIA PaCa2	D13_2	0.01	1_D13_2_40	S	0	-20	-200	-3.33333	112.616	112.616	102.696	1.0966
1	MIA PaCa2	D13_2	0.01	1_D13_2_40	S	1	-19	-190	-3.16667	103.845	103.845	98.9025	1.04997
1	MIA PaCa2	D13_2	0.01	1_D13_2_40	S	4	-16	-160	-2.66667	97.8327	97.8327	94.8279	1.03169
1	MIA PaCa2	D13_2	0.01	1_D13_2_40	S	5	-15	-150	-2.5	96.569	96.569	93.7282	1.03031
1	MIA PaCa2	D13_2	0.01	1_D13_2_40	S	6	-14	-140	-2.33333	102.473	102.473	91.2043	1.12355
1	MIA PaCa2	D13_2	0.01	1_D13_2_40	S	7	-13	-130	-2.16667	104.729	104.729	91.0398	1.15036
1	MIA PaCa2	D13_2	0.01	1_D13_2_40	S	8	-12	-120	-2	97.1538	97.1538	89.9628	1.07993
1	MIA PaCa2	D13_2	0.01	1_D13_2_40	S	9	-11	-110	-1.83333	95.2817	95.2817	88.8498	1.07239
1	MIA PaCa2	D13_2	0.01	1_D13_2_40	S	10	-10	-100	-1.66667	97.6179	97.6179	88.0257	1.10897
1	MIA PaCa2	D13_2	0.01	1_D13_2_40	S	11	-9	-90	-1.5	98.1924	98.1924	87.39	1.12361
1	MIA PaCa2	D13_2	0.01	1_D13_2_40	S	12	-8	-80	-1.33333	96.2492	96.2492	86.2825	1.11551
1	MIA PaCa2	D13_2	0.01	1_D13_2_40	S	13	-7	-70	-1.16667	97.1994	97.1994	84.872	1.14525
1	MIA PaCa2	D13_2	0.01	1_D13_2_40	S	14	-6	-60	-1	89.4444	89.4444	85.6506	1.04429
1	MIA PaCa2	D13_2	0.01	1_D13_2_40	S	15	-5	-50	-0.833333	91.418	91.418	84.1405	1.08649
1	MIA PaCa2	D13_2	0.01	1_D13_2_40	S	16	-4	-40	-0.666667	87.9071	87.9071	82.5286	1.06517
1	MIA PaCa2	D13_2	0.01	1_D13_2_40	S	17	-3	-30	-0.5	90.8608	90.8608	83.098	1.09342
1	MIA PaCa2	D13_2	0.01	1_D13_2_40	S	18	-2	-20	-0.333333	97.4536	97.4536	82.7797	1.17726
1	MIA PaCa2	D13_2	0.01	1_D13_2_40	S	19	-1	-10	-0.166667	97.4411	97.4411	82.0129	1.18812
1	MIA PaCa2	D13_2	0.01	1_D13_2_40	S	20	0	0	0	90.7078	90.7078	81.1847	1.1173
1	MIA PaCa2	D13_2	0.01	1_D13_2_40	S	21	1	10	0.166667	93.6798	93.6798	84.5183	1.1084
1	MIA PaCa2	D13_2	0.01	1_D13_2_40	S	22	2	20	0.333333	92.4833	92.4833	82.9015	1.11558
1	MIA PaCa2	D13_2	0.01	1_D13_2_40	S	23	3	30	0.5	85.8179	85.8179	82.0655	1.04572
1	MIA PaCa2	D13_2	0.01	1_D13_2_40	S	24	4	40	0.666667	85.3343	85.3343	80.9707	1.05389
1	MIA PaCa2	D13_2	0.01	1_D13_2_40	S	25	5	50	0.833333	84.9938	84.9938	80.691	1.05332
1	MIA PaCa2	D13_2	0.01	1_D13_2_40	S	26	6	60	1	86.4189	86.4189	79.6097	1.08553
1	MIA PaCa2	D13_2	0.01	1_D13_2_40	S	27	7	70	1.16667	88.5385	88.5385	79.1117	1.11916
1	MIA PaCa2	D13_2	0.01	1_D13_2_40	S	28	8	80	1.33333	91.5111	91.5111	78.0016	1.1732
1	MIA PaCa2	D13_2	0.01	1_D13_2_40	S	29	9	90	1.5	88.1043	88.1043	77.8528	1.13168
1	MIA PaCa2	D13_2	0.01	1_D13_2_40	S	30	10	100	1.66667	85.4972	85.4972	77.6698	1.10078
1	MIA PaCa2	D13_2	0.01	1_D13_2_40	S	31	11	110	1.83333	82.8584	82.8584	77.1169	1.07445
1	MIA PaCa2	D13_2	0.01	1_D13_2_40	S	32	12	120	2	83.0536	83.0536	76.7701	1.08185
1	MIA PaCa2	D13_2	0.01	1_D13_2_40	S	33	13	130	2.16667	87.7749	87.7749	75.9843	1.15517
1	MIA PaCa2	D13_2	0.01	1_D13_2_40	S	34	14	140	2.33333	85.1823	85.1823	75.0842	1.13449
1	MIA PaCa2	D13_2	0.01	1_D13_2_40	S	35	15	150	2.5	86.4829	86.4829	75.707	1.14234
1	MIA PaCa2	D13_2	0.01	1_D13_2_40	S	36	16	160	2.66667	84.3816	84.3816	74.2775	1.13603
1	MIA PaCa2	D13_2	0.01	1_D13_2_40	S	37	17	170	2.83333	81.6452	81.6452	73.2738	1.11425
1	MIA PaCa2	D13_2	0.01	1_D13_2_40	S	38	18	180	3	83.3553	83.3553	73.1743	1.13913
1	MIA PaCa2	D13_2	0.01	1_D13_2_40	S	39	19	190	3.16667	81.1846	81.1846	72.5019	1.11976
1	MIA PaCa2	D13_2	0.01	1_D13_2_40	S	40	20	200	3.33333	81.4635	81.4635	71.7669	1.13511
1	MIA PaCa2	D13_2	0.01	1_D13_2_40	S	41	21	210	3.5	81.2725	81.2725	72.0161	1.12853
1	MIA PaCa2	D13_2	0.01	1_D13_2_40	S	42	22	220	3.66667	81.4318	81.4318	71.8185	1.13386
1	MIA PaCa2	D13_2	0.01	1_D13_2_40	S	43	23	230	3.83333	79.9462	79.9462	71.1314	1.12392
1	MIA PaCa2	D13_2	0.01	1_D13_2_40	S	44	24	240	4	80.8118	80.8118	70.5922	1.14477
1	MIA PaCa2	D13_2	0.01	1_D13_2_40	S	45	25	250	4.16667	79.2546	79.2546	70.3088	1.12724
1	MIA PaCa2	D13_2	0.01	1_D13_2_40	S	46	26	260	4.33333	74.8794	74.8794	70.5953	1.06069
1	MIA PaCa2	D13_2	0.01	1_D13_2_40	S	47	27	270	4.5	76.385	76.385	70.0862	1.08987
1	MIA PaCa2	D13_2	0.01	1_D13_2_40	S	48	28	280	4.66667	78.1711	78.1711	69.4746	1.12517
1	MIA PaCa2	D13_2	0.01	1_D13_2_40	S	49	29	290	4.83333	76.2691	76.2691	68.6304	1.1113
1	MIA PaCa2	D13_2	0.01	1_D13_2_40	S	50	30	300	5	78.2537	78.2537	68.8548	1.1365
1	MIA PaCa2	D13_2	0.01	1_D13_2_40	S	51	31	310	5.16667	74.0815	74.0815	68.1679	1.08675
1	MIA PaCa2	D13_2	0.01	1_D13_2_40	S	52	32	320	5.33333	73.7584	73.7584	67.3507	1.09514
1	MIA PaCa2	D13_2	0.01	1_D13_2_40	S	53	33	330	5.5	76.633	76.633	67.9219	1.12825
1	MIA PaCa2	D13_2	0.01	1_D13_2_40	S	54	34	340	5.66667	77.5341	77.5341	68.0349	1.13962
1	MIA PaCa2	D13_2	0.01	1_D13_2_40	S	55	35	350	5.83333	78.1114	78.1114	68.887	1.13391
1	MIA PaCa2	D13_2	0.01	1_D13_2_40	S	56	36	360	6	72.2529	72.2529	68.1633	1.06
1	MIA PaCa2	D13_2	0.01	1_D13_2_40	S	57	37	370	6.16667	74.8045	74.8045	67.2471	1.11238
1	MIA PaCa2	D13_2	0.01	1_D13_2_40	S	58	38	380	6.33333	76.1008	76.1008	67.1163	1.13387
1	MIA PaCa2	D13_2	0.01	1_D13_2_40	S	59	39	390	6.5	76.24	76.24	66.9979	1.13795
1	MIA PaCa2	D13_2	0.01	1_D13_2_40	S	60	40	400	6.66667	78.4055	78.4055	66.8466	1.17292
1	MIA PaCa2	D13_2	0.01	1_D13_2_40	S	61	41	410	6.83333	77.6309	77.6309	66.872	1.16089
1	MIA PaCa2	D13_2	0.01	1_D13_2_40	S	62	42	420	7	79.6903	79.6903	67.4151	1.18208
1	MIA PaCa2	D13_2	0.01	1_D13_2_40	S	63	43	430	7.16667	78.7082	78.7082	66.593	1.18193
1	MIA PaCa2	D13_2	0.01	1_D13_2_40	S	64	44	440	7.33333	78.5294	78.5294	64.9413	1.20924
1	MIA PaCa2	D13_2	0.01	1_D13_2_40	S	65	45	450	7.5	79.9564	79.9564	65.8821	1.21363
1	MIA PaCa2	D13_2	0.01	1_D13_2_40	S	66	46	460	7.66667	79.9235	79.9235	65.7717	1.21517
1	MIA PaCa2	D13_2	0.01	1_D13_2_40	S	67	47	470	7.83333	82.1205	82.1205	65.9693	1.24483
1	MIA PaCa2	D13_2	0.01	1_D13_2_40	S	68	48	480	8	80.0432	80.0432	65.2461	1.22679
1	MIA PaCa2	D13_2	0.01	1_D13_2_40	S	69	49	490	8.16667	80.0029	80.0029	64.9541	1.23168
1	MIA PaCa2	D13_2	0.01	1_D13_2_40	S	70	50	500	8.33333	77.1126	77.1126	64.7238	1.19141
1	MIA PaCa2	D13_2	0.01	1_D13_2_40	S	71	51	510	8.5	79.7529	79.7529	64.8745	1.22934
1	MIA PaCa2	D13_2	0.01	1_D13_2_40	S	72	52	520	8.66667	78.4478	78.4478	65.0075	1.20675
1	MIA PaCa2	D13_2	0.01	1_D13_2_40	S	73	53	530	8.83333	82.4068	82.4068	64.3036	1.28153
1	MIA PaCa2	D13_2	0.01	1_D13_2_40	S	74	54	540	9	83.3644	83.3644	64.0165	1.30223
1	MIA PaCa2	D13_2	0.01	1_D13_2_40	S	75	55	550	9.16667	81.3814	81.3814	64.712	1.25759
1	MIA PaCa2	D13_2	0.01	1_D13_2_40	S	76	56	560	9.33333	80.1825	80.1825	64.0422	1.25203
1	MIA PaCa2	D13_3	0.01	1_D13_3_19	G2	1	-19	-190	-3.16667	97.5085	97.5085	98.9025	0.985906
1	MIA PaCa2	D13_3	0.01	1_D13_3_19	G2	2	-18	-180	-3	97.2748	97.2748	98.287	0.989701
1	MIA PaCa2	D13_3	0.01	1_D13_3_19	G2	3	-17	-170	-2.83333	93.1145	93.1145	95.5639	0.974369
1	MIA PaCa2	D13_3	0.01	1_D13_3_19	G2	4	-16	-160	-2.66667	90.9135	90.9135	94.8279	0.958721
1	MIA PaCa2	D13_3	0.01	1_D13_3_19	G2	5	-15	-150	-2.5	90.9923	90.9923	93.7282	0.970811
1	MIA PaCa2	D13_3	0.01	1_D13_3_19	G2	6	-14	-140	-2.33333	85.9926	85.9926	91.2043	0.942857
1	MIA PaCa2	D13_3	0.01	1_D13_3_19	G2	7	-13	-130	-2.16667	84.708	84.708	91.0398	0.930451
1	MIA PaCa2	D13_3	0.01	1_D13_3_19	G2	8	-12	-120	-2	84.02	84.02	89.9628	0.933942
1	MIA PaCa2	D13_3	0.01	1_D13_3_19	G2	9	-11	-110	-1.83333	84.278	84.278	88.8498	0.948545
1	MIA PaCa2	D13_3	0.01	1_D13_3_19	G2	10	-10	-100	-1.66667	84.7854	84.7854	88.0257	0.963189
1	MIA PaCa2	D13_3	0.01	1_D13_3_19	G2	11	-9	-90	-1.5	89.3619	89.3619	87.39	1.02256
1	MIA PaCa2	D13_3	0.01	1_D13_3_19	G2	12	-8	-80	-1.33333	84.9139	84.9139	86.2825	0.984138
1	MIA PaCa2	D13_3	0.01	1_D13_3_19	G2	13	-7	-70	-1.16667	83.7102	83.7102	84.872	0.986311
1	MIA PaCa2	D13_3	0.01	1_D13_3_19	G2	14	-6	-60	-1	86.751	86.751	85.6506	1.01285
1	MIA PaCa2	D13_3	0.01	1_D13_3_19	G2	15	-5	-50	-0.833333	83.6509	83.6509	84.1405	0.994182
1	MIA PaCa2	D13_3	0.01	1_D13_3_19	G2	16	-4	-40	-0.666667	81.992	81.992	82.5286	0.993499
1	MIA PaCa2	D13_3	0.01	1_D13_3_19	G2	17	-3	-30	-0.5	83.7984	83.7984	83.098	1.00843
1	MIA PaCa2	D13_3	0.01	1_D13_3_19	G2	18	-2	-20	-0.333333	85.7796	85.7796	82.7797	1.03624
1	MIA PaCa2	D13_3	0.01	1_D13_3_19	G2	19	-1	-10	-0.166667	83.0042	83.0042	82.0129	1.01209
1	MIA PaCa2	D13_3	0.01	1_D13_3_19	G2	20	0	0	0	82.9256	82.9256	81.1847	1.02144
1	MIA PaCa2	D13_3	0.01	1_D13_3_19	G2	21	1	10	0.166667	93.875	93.875	84.5183	1.11071
1	MIA PaCa2	D13_3	0.01	1_D13_3_19	G2	22	2	20	0.333333	89.581	89.581	82.9015	1.08057
1	MIA PaCa2	D13_3	0.01	1_D13_3_19	G2	23	3	30	0.5	94.0796	94.0796	82.0655	1.1464
1	MIA PaCa2	D13_3	0.01	1_D13_3_19	G2	24	4	40	0.666667	96.0897	96.0897	80.9707	1.18672
1	MIA PaCa2	D13_3	0.01	1_D13_3_19	G2	25	5	50	0.833333	95.0548	95.0548	80.691	1.17801
1	MIA PaCa2	D13_3	0.01	1_D13_3_19	G2	26	6	60	1	97.3859	97.3859	79.6097	1.22329
1	MIA PaCa2	D13_3	0.01	1_D13_3_21	S	1	-19	-190	-3.16667	102.469	102.469	98.9025	1.03606
1	MIA PaCa2	D13_3	0.01	1_D13_3_21	S	2	-18	-180	-3	101.024	101.024	98.287	1.02785
1	MIA PaCa2	D13_3	0.01	1_D13_3_21	S	3	-17	-170	-2.83333	97.6206	97.6206	95.5639	1.02152
1	MIA PaCa2	D13_3	0.01	1_D13_3_21	S	4	-16	-160	-2.66667	99.9049	99.9049	94.8279	1.05354
1	MIA PaCa2	D13_3	0.01	1_D13_3_21	S	5	-15	-150	-2.5	98.6049	98.6049	93.7282	1.05203
1	MIA PaCa2	D13_3	0.01	1_D13_3_21	S	6	-14	-140	-2.33333	99.3147	99.3147	91.2043	1.08893
1	MIA PaCa2	D13_3	0.01	1_D13_3_21	S	7	-13	-130	-2.16667	93.2618	93.2618	91.0398	1.02441
1	MIA PaCa2	D13_3	0.01	1_D13_3_21	S	8	-12	-120	-2	91.5415	91.5415	89.9628	1.01755
1	MIA PaCa2	D13_3	0.01	1_D13_3_21	S	9	-11	-110	-1.83333	89.9152	89.9152	88.8498	1.01199
1	MIA PaCa2	D13_3	0.01	1_D13_3_21	S	10	-10	-100	-1.66667	91.1488	91.1488	88.0257	1.03548
1	MIA PaCa2	D13_3	0.01	1_D13_3_21	S	11	-9	-90	-1.5	89.5409	89.5409	87.39	1.02461
1	MIA PaCa2	D13_3	0.01	1_D13_3_21	S	12	-8	-80	-1.33333	87.616	87.616	86.2825	1.01545
1	MIA PaCa2	D13_3	0.01	1_D13_3_21	S	13	-7	-70	-1.16667	86.2366	86.2366	84.872	1.01608
1	MIA PaCa2	D13_3	0.01	1_D13_3_21	S	14	-6	-60	-1	87.0294	87.0294	85.6506	1.0161
1	MIA PaCa2	D13_3	0.01	1_D13_3_21	S	15	-5	-50	-0.833333	86.8383	86.8383	84.1405	1.03206
1	MIA PaCa2	D13_3	0.01	1_D13_3_21	S	16	-4	-40	-0.666667	84.0535	84.0535	82.5286	1.01848
1	MIA PaCa2	D13_3	0.01	1_D13_3_21	S	17	-3	-30	-0.5	79.2675	79.2675	83.098	0.953904
1	MIA PaCa2	D13_3	0.01	1_D13_3_21	S	18	-2	-20	-0.333333	83.5108	83.5108	82.7797	1.00883
1	MIA PaCa2	D13_3	0.01	1_D13_3_21	S	19	-1	-10	-0.166667	82.7266	82.7266	82.0129	1.0087
1	MIA PaCa2	D13_3	0.01	1_D13_3_21	S	20	0	0	0	81.6491	81.6491	81.1847	1.00572
1	MIA PaCa2	D13_3	0.01	1_D13_3_21	S	21	1	10	0.166667	83.0276	83.0276	84.5183	0.982362
1	MIA PaCa2	D13_3	0.01	1_D13_3_21	S	22	2	20	0.333333	90.3855	90.3855	82.9015	1.09028
1	MIA PaCa2	D13_3	0.01	1_D13_3_21	S	23	3	30	0.5	93.8182	93.8182	82.0655	1.14321
1	MIA PaCa2	D13_3	0.01	1_D13_3_21	S	24	4	40	0.666667	96.1958	96.1958	80.9707	1.18803
1	MIA PaCa2	D13_3	0.01	1_D13_3_21	S	25	5	50	0.833333	92.6926	92.6926	80.691	1.14874
1	MIA PaCa2	D13_3	0.01	1_D13_3_21	S	26	6	60	1	92.0936	92.0936	79.6097	1.15681
1	MIA PaCa2	D13_3	0.01	1_D13_3_21	S	27	7	70	1.16667	86.7143	86.7143	79.1117	1.0961
1	MIA PaCa2	D13_3	0.01	1_D13_3_21	S	28	8	80	1.33333	84.0836	84.0836	78.0016	1.07797
1	MIA PaCa2	D13_3	0.01	1_D13_3_21	S	29	9	90	1.5	83.5479	83.5479	77.8528	1.07315
1	MIA PaCa2	D13_3	0.01	1_D13_3_21	S	30	10	100	1.66667	85.1923	85.1923	77.6698	1.09685
1	MIA PaCa2	D13_3	0.01	1_D13_3_21	S	31	11	110	1.83333	85.712	85.712	77.1169	1.11145
1	MIA PaCa2	D13_3	0.01	1_D13_3_21	S	32	12	120	2	84.1289	84.1289	76.7701	1.09586
1	MIA PaCa2	D13_3	0.01	1_D13_3_21	S	33	13	130	2.16667	84.774	84.774	75.9843	1.11568
1	MIA PaCa2	D13_3	0.01	1_D13_3_21	S	34	14	140	2.33333	82.8602	82.8602	75.0842	1.10356
1	MIA PaCa2	D13_3	0.01	1_D13_3_21	S	35	15	150	2.5	82.1254	82.1254	75.707	1.08478
1	MIA PaCa2	D13_3	0.01	1_D13_3_21	S	36	16	160	2.66667	81.8249	81.8249	74.2775	1.10161
1	MIA PaCa2	D13_3	0.01	1_D13_3_21	S	37	17	170	2.83333	80.7982	80.7982	73.2738	1.10269
1	MIA PaCa2	D13_3	0.01	1_D13_3_21	S	38	18	180	3	83.6314	83.6314	73.1743	1.14291
1	MIA PaCa2	D13_3	0.01	1_D13_3_21	S	39	19	190	3.16667	82.9667	82.9667	72.5019	1.14434
1	MIA PaCa2	D13_3	0.01	1_D13_3_21	S	40	20	200	3.33333	81.0812	81.0812	71.7669	1.12979
1	MIA PaCa2	D13_3	0.01	1_D13_3_21	S	41	21	210	3.5	81.1743	81.1743	72.0161	1.12717
1	MIA PaCa2	D13_3	0.01	1_D13_3_21	S	42	22	220	3.66667	80.4126	80.4126	71.8185	1.11966
1	MIA PaCa2	D13_3	0.01	1_D13_3_21	S	43	23	230	3.83333	78.4212	78.4212	71.1314	1.10248
1	MIA PaCa2	D13_3	0.01	1_D13_3_21	S	44	24	240	4	77.9461	77.9461	70.5922	1.10417
1	MIA PaCa2	D13_3	0.01	1_D13_3_21	S	45	25	250	4.16667	78.4755	78.4755	70.3088	1.11615
1	MIA PaCa2	D13_3	0.01	1_D13_3_21	S	46	26	260	4.33333	80.8824	80.8824	70.5953	1.14572
1	MIA PaCa2	D13_3	0.01	1_D13_3_21	S	47	27	270	4.5	83.8412	83.8412	70.0862	1.19626
1	MIA PaCa2	D13_3	0.01	1_D13_3_21	S	48	28	280	4.66667	81.1361	81.1361	69.4746	1.16785
1	MIA PaCa2	D13_3	0.01	1_D13_3_21	S	49	29	290	4.83333	80.3657	80.3657	68.6304	1.17099
1	MIA PaCa2	D13_3	0.01	1_D13_3_21	S	50	30	300	5	82.4841	82.4841	68.8548	1.19794
1	MIA PaCa2	D13_3	0.01	1_D13_3_21	S	51	31	310	5.16667	79.7245	79.7245	68.1679	1.16953
1	MIA PaCa2	D13_3	0.01	1_D13_3_21	S	52	32	320	5.33333	77.5474	77.5474	67.3507	1.1514
1	MIA PaCa2	D13_3	0.01	1_D13_3_21	S	53	33	330	5.5	79	79	67.9219	1.1631
1	MIA PaCa2	D13_3	0.01	1_D13_3_21	S	54	34	340	5.66667	78.9561	78.9561	68.0349	1.16052
1	MIA PaCa2	D13_3	0.01	1_D13_3_21	S	55	35	350	5.83333	81.202	81.202	68.887	1.17877
1	MIA PaCa2	D13_3	0.01	1_D13_3_21	S	56	36	360	6	81.2732	81.2732	68.1633	1.19233
1	MIA PaCa2	D13_3	0.01	1_D13_3_21	S	57	37	370	6.16667	77.9812	77.9812	67.2471	1.15962
1	MIA PaCa2	D13_3	0.01	1_D13_3_21	S	58	38	380	6.33333	76.6872	76.6872	67.1163	1.1426
1	MIA PaCa2	D13_3	0.01	1_D13_3_21	S	59	39	390	6.5	76.9796	76.9796	66.9979	1.14899
1	MIA PaCa2	D13_3	0.01	1_D13_3_21	S	60	40	400	6.66667	78.0339	78.0339	66.8466	1.16736
1	MIA PaCa2	D13_3	0.01	1_D13_3_21	S	61	41	410	6.83333	84.2689	84.2689	66.872	1.26015
1	MIA PaCa2	D13_3	0.01	1_D13_3_21	S	62	42	420	7	78.2885	78.2885	67.4151	1.16129
1	MIA PaCa2	D13_3	0.01	1_D13_3_86	G1	15	-5	-50	-0.833333	87.0304	87.0304	84.1405	1.03435
1	MIA PaCa2	D13_3	0.01	1_D13_3_86	G1	16	-4	-40	-0.666667	84.3905	84.3905	82.5286	1.02256
1	MIA PaCa2	D13_3	0.01	1_D13_3_86	G1	17	-3	-30	-0.5	85.5091	85.5091	83.098	1.02902
1	MIA PaCa2	D13_3	0.01	1_D13_3_86	G1	18	-2	-20	-0.333333	79.984	79.984	82.7797	0.966227
1	MIA PaCa2	D13_3	0.01	1_D13_3_86	G1	19	-1	-10	-0.166667	80.1242	80.1242	82.0129	0.976971
1	MIA PaCa2	D13_3	0.01	1_D13_3_86	G1	20	0	0	0	79.9514	79.9514	81.1847	0.984808
1	MIA PaCa2	D13_3	0.01	1_D13_3_86	G1	21	1	10	0.166667	86.6174	86.6174	84.5183	1.02484
1	MIA PaCa2	D13_3	0.01	1_D13_3_86	G1	22	2	20	0.333333	84.0182	84.0182	82.9015	1.01347
1	MIA PaCa2	D13_3	0.01	1_D13_3_86	G1	23	3	30	0.5	85.2006	85.2006	82.0655	1.0382
1	MIA PaCa2	D13_3	0.01	1_D13_3_86	G1	24	4	40	0.666667	85.7316	85.7316	80.9707	1.0588
1	MIA PaCa2	D13_3	0.01	1_D13_3_86	G1	25	5	50	0.833333	87.281	87.281	80.691	1.08167
1	MIA PaCa2	D13_3	0.01	1_D13_3_86	G1	26	6	60	1	89.3246	89.3246	79.6097	1.12203
1	MIA PaCa2	D13_3	0.01	1_D13_3_86	G1	27	7	70	1.16667	90.8135	90.8135	79.1117	1.14792
1	MIA PaCa2	D13_3	0.01	1_D13_3_86	G1	28	8	80	1.33333	85.7534	85.7534	78.0016	1.09938
1	MIA PaCa2	D13_3	0.01	1_D13_3_86	G1	29	9	90	1.5	84.5993	84.5993	77.8528	1.08666
1	MIA PaCa2	D13_3	0.01	1_D13_3_86	G1	30	10	100	1.66667	85.25	85.25	77.6698	1.09759
1	MIA PaCa2	D13_3	0.01	1_D13_3_86	G1	31	11	110	1.83333	83.4	83.4	77.1169	1.08147
1	MIA PaCa2	D13_3	0.01	1_D13_3_86	G1	32	12	120	2	80.7443	80.7443	76.7701	1.05177
1	MIA PaCa2	D13_3	0.01	1_D13_3_86	G1	33	13	130	2.16667	79.4327	79.4327	75.9843	1.04538
1	MIA PaCa2	D13_3	0.01	1_D13_3_86	G1	34	14	140	2.33333	79.3746	79.3746	75.0842	1.05714
1	MIA PaCa2	D13_3	0.01	1_D13_3_86	G1	35	15	150	2.5	78.982	78.982	75.707	1.04326
1	MIA PaCa2	D13_3	0.01	1_D13_3_86	G1	36	16	160	2.66667	78.6431	78.6431	74.2775	1.05877
1	MIA PaCa2	D13_3	0.01	1_D13_3_86	G1	37	17	170	2.83333	76.375	76.375	73.2738	1.04232
1	MIA PaCa2	D13_3	0.01	1_D13_3_86	G1	38	18	180	3	80.6902	80.6902	73.1743	1.10271
1	MIA PaCa2	D13_3	0.01	1_D13_3_86	G1	39	19	190	3.16667	80.9076	80.9076	72.5019	1.11594
1	MIA PaCa2	D13_3	0.01	1_D13_3_86	G1	40	20	200	3.33333	81.8993	81.8993	71.7669	1.14119
1	MIA PaCa2	D13_3	0.01	1_D13_3_86	G1	41	21	210	3.5	83.0164	83.0164	72.0161	1.15275
1	MIA PaCa2	D13_3	0.01	1_D13_3_86	G1	42	22	220	3.66667	82.8245	82.8245	71.8185	1.15325
1	MIA PaCa2	D13_3	0.01	1_D13_3_86	G1	43	23	230	3.83333	82.7796	82.7796	71.1314	1.16376
1	MIA PaCa2	D13_3	0.01	1_D13_3_86	G1	44	24	240	4	81.3438	81.3438	70.5922	1.15231
1	MIA PaCa2	D13_3	0.01	1_D13_3_86	G1	45	25	250	4.16667	82.2182	82.2182	70.3088	1.16939
1	MIA PaCa2	D13_3	0.01	1_D13_3_86	G1	46	26	260	4.33333	80.375	80.375	70.5953	1.13853
1	MIA PaCa2	D13_3	0.01	1_D13_3_86	G1	47	27	270	4.5	75.4773	75.4773	70.0862	1.07692
1	MIA PaCa2	D13_3	0.01	1_D13_3_86	G1	48	28	280	4.66667	78.5867	78.5867	69.4746	1.13116
1	MIA PaCa2	D13_3	0.01	1_D13_3_86	G1	49	29	290	4.83333	79.822	79.822	68.6304	1.16307
1	MIA PaCa2	D13_3	0.01	1_D13_3_86	G1	50	30	300	5	79.7906	79.7906	68.8548	1.15882
1	MIA PaCa2	D13_3	0.01	1_D13_3_86	G1	51	31	310	5.16667	77.4171	77.4171	68.1679	1.13568
1	MIA PaCa2	D13_3	0.01	1_D13_3_86	G1	52	32	320	5.33333	74.5878	74.5878	67.3507	1.10745
1	MIA PaCa2	D13_3	0.01	1_D13_3_86	G1	53	33	330	5.5	75.4759	75.4759	67.9219	1.11122
1	MIA PaCa2	D13_3	0.01	1_D13_3_86	G1	54	34	340	5.66667	71.5718	71.5718	68.0349	1.05199
1	MIA PaCa2	D13_3	0.01	1_D13_3_86	G1	55	35	350	5.83333	77.0597	77.0597	68.887	1.11864
1	MIA PaCa2	D13_3	0.01	1_D13_3_86	G1	56	36	360	6	78.9875	78.9875	68.1633	1.1588
1	MIA PaCa2	D13_3	0.01	1_D13_3_86	G1	57	37	370	6.16667	76.98	76.98	67.2471	1.14473
1	MIA PaCa2	D13_3	0.01	1_D13_3_86	G1	58	38	380	6.33333	77.861	77.861	67.1163	1.16009
1	MIA PaCa2	D13_3	0.01	1_D13_3_86	G1	59	39	390	6.5	75.6708	75.6708	66.9979	1.12945
1	MIA PaCa2	D13_3	0.01	1_D13_3_86	G1	60	40	400	6.66667	74.3333	74.3333	66.8466	1.112
1	MIA PaCa2	D13_3	0.01	1_D13_3_86	G1	61	41	410	6.83333	74.0026	74.0026	66.872	1.10663
1	MIA PaCa2	D13_3	0.01	1_D13_3_86	G1	62	42	420	7	73.8142	73.8142	67.4151	1.09492
1	MIA PaCa2	D13_3	0.01	1_D13_3_86	G1	63	43	430	7.16667	75.9898	75.9898	66.593	1.14111
1	MIA PaCa2	D13_3	0.01	1_D13_3_86	G1	64	44	440	7.33333	71.3953	71.3953	64.9413	1.09938
1	MIA PaCa2	D13_3	0.01	1_D13_3_86	G1	65	45	450	7.5	66.9316	66.9316	65.8821	1.01593
1	MIA PaCa2	D13_3	0.01	1_D13_3_86	G1	66	46	460	7.66667	68.0884	68.0884	65.7717	1.03522
1	MIA PaCa2	D13_3	0.01	1_D13_3_86	G1	67	47	470	7.83333	70.6683	70.6683	65.9693	1.07123
1	MIA PaCa2	D13_3	0.01	1_D13_3_86	G1	68	48	480	8	71.886	71.886	65.2461	1.10177
1	MIA PaCa2	D13_3	0.01	1_D13_3_86	G1	69	49	490	8.16667	71.088	71.088	64.9541	1.09443
1	MIA PaCa2	D13_3	0.01	1_D13_3_86	G1	70	50	500	8.33333	67.2657	67.2657	64.7238	1.03927
1	MIA PaCa2	D13_3	0.01	1_D13_3_86	G1	71	51	510	8.5	68.6753	68.6753	64.8745	1.05859
1	MIA PaCa2	D13_3	0.01	1_D13_3_86	G1	72	52	520	8.66667	65.8578	65.8578	65.0075	1.01308
1	MIA PaCa2	D13_3	0.01	1_D13_3_86	G1	73	53	530	8.83333	66.7891	66.7891	64.3036	1.03865
1	MIA PaCa2	D13_3	0.01	1_D13_3_86	G1	74	54	540	9	67.2183	67.2183	64.0165	1.05002
1	MIA PaCa2	D13_3	0.01	1_D13_3_86	G1	75	55	550	9.16667	70.0258	70.0258	64.712	1.08212
1	MIA PaCa2	D13_3	0.01	1_D13_3_86	G1	76	56	560	9.33333	68.8866	68.8866	64.0422	1.07564
1	MIA PaCa2	D13_3	0.01	1_D13_3_86	G1	77	57	570	9.5	70.5304	70.5304	63.8764	1.10417
1	MIA PaCa2	D13_3	0.01	1_D13_3_86	G1	78	58	580	9.66667	73.8858	73.8858	63.7423	1.15913
1	MIA PaCa2	D13_3	0.01	1_D13_3_86	G1	79	59	590	9.83333	72.7611	72.7611	63.4249	1.1472
1	MIA PaCa2	D13_3	0.01	1_D13_3_86	G1	80	60	600	10	73.8149	73.8149	63.1512	1.16886
1	MIA PaCa2	D13_3	0.01	1_D13_3_86	G1	81	61	610	10.1667	76.9446	76.9446	63.2666	1.2162
1	MIA PaCa2	D13_3	0.01	1_D13_3_86	G1	82	62	620	10.3333	77.1942	77.1942	62.8471	1.22829
1	MIA PaCa2	D13_3	0.01	1_D13_3_86	G1	83	63	630	10.5	72.6911	72.6911	62.9485	1.15477
1	MIA PaCa2	D13_3	0.01	1_D13_3_86	G1	84	64	640	10.6667	70.5558	70.5558	63.5908	1.10953
1	MIA PaCa2	D13_3	0.01	1_D13_3_86	G1	85	65	650	10.8333	70.3231	70.3231	63.0209	1.11587
1	MIA PaCa2	D13_3	0.01	1_D13_3_86	G1	86	66	660	11	74.5496	74.5496	63.2933	1.17784
1	MIA PaCa2	D13_3	0.01	1_D13_3_86	G1	87	67	670	11.1667	69.6166	69.6166	61.9681	1.12343
1	MIA PaCa2	D13_3	0.01	1_D13_3_86	G1	88	68	680	11.3333	71.2782	71.2782	61.0898	1.16678
1	MIA PaCa2	D13_3	0.01	1_D13_3_86	G1	89	69	690	11.5	71.2751	71.2751	61.5941	1.15717
1	MIA PaCa2	D13_3	0.01	1_D13_3_86	G1	90	70	700	11.6667	68.9284	68.9284	62.8735	1.0963
1	MIA PaCa2	D13_3	0.01	1_D13_3_86	G1	91	71	710	11.8333	66.093	66.093	61.5615	1.07361
1	MIA PaCa2	D13_3	0.01	1_D13_3_86	G1	92	72	720	12	67.5052	67.5052	60.7859	1.11054
1	MIA PaCa2	D13_3	0.01	1_D13_3_86	G1	93	73	730	12.1667	66.3979	66.3979	60.8609	1.09098
1	MIA PaCa2	D13_3	0.01	1_D13_3_86	G1	94	74	740	12.3333	69.6383	69.6383	60.9904	1.14179
1	MIA PaCa2	D13_3	0.01	1_D13_3_86	G1	95	75	750	12.5	70.6867	70.6867	61.556	1.14833
1	MIA PaCa2	D13_3	0.01	1_D13_3_86	G1	96	76	760	12.6667	72.1509	72.1509	61.3403	1.17624
1	MIA PaCa2	D13_3	0.01	1_D13_3_86	G1	97	77	770	12.8333	71.8598	71.8598	61.6391	1.16582
1	MIA PaCa2	D13_3	0.01	1_D13_3_86	G1	98	78	780	13	63.5119	63.5119	60.4758	1.0502
1	MIA PaCa2	D13_3	0.01	1_D13_3_86	G1	99	79	790	13.1667	65.1319	65.1319	60.3963	1.07841
1	MIA PaCa2	D13_3	0.01	1_D13_3_86	G1	100	80	800	13.3333	74.5465	74.5465	60.7884	1.22633
1	MIA PaCa2	D13_3	0.01	1_D13_3_86	G1	101	81	810	13.5	76.3324	76.3324	60.3059	1.26575
1	MIA PaCa2	D13_3	0.01	1_D13_3_86	G1	102	82	820	13.6667	68.7855	68.7855	60.7794	1.13172
1	MIA PaCa2	D13_3	0.01	1_D13_3_86	G1	103	83	830	13.8333	70.8444	70.8444	60.5056	1.17087
1	MIA PaCa2	D13_3	0.01	1_D13_3_86	G1	104	84	840	14	65.6868	65.6868	59.623	1.1017
1	MIA PaCa2	D13_3	0.01	1_D13_3_86	G1	105	85	850	14.1667	66.5149	66.5149	59.3892	1.11998
1	MIA PaCa2	D13_3	0.01	1_D13_3_86	G1	106	86	860	14.3333	70.3219	70.3219	59.9458	1.17309
1	MIA PaCa2	D13_3	0.01	1_D13_3_86	G1	107	87	870	14.5	70.4886	70.4886	59.293	1.18882
1	MIA PaCa2	D13_3	0.01	1_D13_3_86	G1	108	88	880	14.6667	66.6743	66.6743	59.7326	1.11621
1	MIA PaCa2	D13_3	0.01	1_D13_3_86	G1	109	89	890	14.8333	68.2943	68.2943	59.2145	1.15334
1	MIA PaCa2	D13_3	0.01	1_D13_3_86	G1	110	90	900	15	65.8683	65.8683	59.5265	1.10654
1	MIA PaCa2	D13_3	0.01	1_D13_3_86	G1	111	91	910	15.1667	69.5894	69.5894	22.61	3.07781
1	MIA PaCa2	D13_3	0.01	1_D13_3_86	G1	112	92	920	15.3333	26.2919	26.2919	22.6798	1.15927
1	MIA PaCa2	D13_3	0.01	1_D13_3_86	G1	113	93	930	15.5	26.2549	26.2549	22.7253	1.15532
1	MIA PaCa2	D13_3	0.01	1_D13_3_86	G1	114	94	940	15.6667	23.9295	23.9295	22.5639	1.06052
1	MIA PaCa2	D13_3	0.01	1_D13_3_86	G1	115	95	950	15.8333	23.072	23.072	22.4399	1.02817
1	MIA PaCa2	D13_3	0.01	1_D13_3_86	G1	116	96	960	16	21.0841	21.0841	22.771	0.925918
1	MIA PaCa2	D13_3	0.01	1_D13_3_86	G1	118	98	980	16.3333	23.3061	23.3061	23.0617	1.0106
1	MIA PaCa2	D13_3	0.01	1_D13_3_87	G1	16	-4	-40	-0.666667	91.0296	91.0296	82.5286	1.10301
1	MIA PaCa2	D13_3	0.01	1_D13_3_87	G1	17	-3	-30	-0.5	96.3113	96.3113	83.098	1.15901
1	MIA PaCa2	D13_3	0.01	1_D13_3_87	G1	18	-2	-20	-0.333333	85.6564	85.6564	82.7797	1.03475
1	MIA PaCa2	D13_3	0.01	1_D13_3_87	G1	19	-1	-10	-0.166667	91.7947	91.7947	82.0129	1.11927
1	MIA PaCa2	D13_3	0.01	1_D13_3_87	G1	20	0	0	0	86.2878	86.2878	81.1847	1.06286
1	MIA PaCa2	D13_3	0.01	1_D13_3_87	G1	21	1	10	0.166667	92.3311	92.3311	84.5183	1.09244
1	MIA PaCa2	D13_3	0.01	1_D13_3_87	G1	22	2	20	0.333333	88.9326	88.9326	82.9015	1.07275
1	MIA PaCa2	D13_3	0.01	1_D13_3_87	G1	23	3	30	0.5	93.6724	93.6724	82.0655	1.14143
1	MIA PaCa2	D13_3	0.01	1_D13_3_87	G1	24	4	40	0.666667	96.1349	96.1349	80.9707	1.18728
1	MIA PaCa2	D13_3	0.01	1_D13_3_87	G1	25	5	50	0.833333	95.9539	95.9539	80.691	1.18915
1	MIA PaCa2	D13_3	0.01	1_D13_3_87	G1	26	6	60	1	96.1507	96.1507	79.6097	1.20778
1	MIA PaCa2	D13_3	0.01	1_D13_3_87	G1	27	7	70	1.16667	93.2	93.2	79.1117	1.17808
1	MIA PaCa2	D13_3	0.01	1_D13_3_87	G1	28	8	80	1.33333	93.5809	93.5809	78.0016	1.19973
1	MIA PaCa2	D13_3	0.01	1_D13_3_87	G1	29	9	90	1.5	91.1718	91.1718	77.8528	1.17108
1	MIA PaCa2	D13_3	0.01	1_D13_3_87	G1	30	10	100	1.66667	94.9596	94.9596	77.6698	1.22261
1	MIA PaCa2	D13_3	0.01	1_D13_3_87	G1	31	11	110	1.83333	91.9383	91.9383	77.1169	1.19219
1	MIA PaCa2	D13_3	0.01	1_D13_3_87	G1	32	12	120	2	92.25	92.25	76.7701	1.20164
1	MIA PaCa2	D13_3	0.01	1_D13_3_87	G1	33	13	130	2.16667	90.7666	90.7666	75.9843	1.19454
1	MIA PaCa2	D13_3	0.01	1_D13_3_87	G1	34	14	140	2.33333	89.3365	89.3365	75.0842	1.18982
1	MIA PaCa2	D13_3	0.01	1_D13_3_87	G1	35	15	150	2.5	87.5047	87.5047	75.707	1.15583
1	MIA PaCa2	D13_3	0.01	1_D13_3_87	G1	36	16	160	2.66667	80.853	80.853	74.2775	1.08853
1	MIA PaCa2	D13_3	0.01	1_D13_3_87	G1	37	17	170	2.83333	81.19	81.19	73.2738	1.10804
1	MIA PaCa2	D13_3	0.01	1_D13_3_87	G1	38	18	180	3	85.509	85.509	73.1743	1.16857
1	MIA PaCa2	D13_3	0.01	1_D13_3_87	G1	39	19	190	3.16667	81.1358	81.1358	72.5019	1.11908
1	MIA PaCa2	D13_3	0.01	1_D13_3_87	G1	40	20	200	3.33333	80.457	80.457	71.7669	1.12109
1	MIA PaCa2	D13_3	0.01	1_D13_3_87	G1	41	21	210	3.5	80.6918	80.6918	72.0161	1.12047
1	MIA PaCa2	D13_3	0.01	1_D13_3_87	G1	42	22	220	3.66667	81.145	81.145	71.8185	1.12986
1	MIA PaCa2	D13_3	0.01	1_D13_3_87	G1	43	23	230	3.83333	79.3428	79.3428	71.1314	1.11544
1	MIA PaCa2	D13_3	0.01	1_D13_3_87	G1	44	24	240	4	80.5612	80.5612	70.5922	1.14122
1	MIA PaCa2	D13_3	0.01	1_D13_3_87	G1	45	25	250	4.16667	80.5527	80.5527	70.3088	1.1457
1	MIA PaCa2	D13_3	0.01	1_D13_3_87	G1	46	26	260	4.33333	79.5595	79.5595	70.5953	1.12698
1	MIA PaCa2	D13_3	0.01	1_D13_3_87	G1	47	27	270	4.5	76.6508	76.6508	70.0862	1.09367
1	MIA PaCa2	D13_3	0.01	1_D13_3_87	G1	48	28	280	4.66667	76.9118	76.9118	69.4746	1.10705
1	MIA PaCa2	D13_3	0.01	1_D13_3_87	G1	49	29	290	4.83333	76.1511	76.1511	68.6304	1.10958
1	MIA PaCa2	D13_3	0.01	1_D13_3_87	G1	50	30	300	5	77.995	77.995	68.8548	1.13275
1	MIA PaCa2	D13_3	0.01	1_D13_3_87	G1	51	31	310	5.16667	79.35	79.35	68.1679	1.16404
1	MIA PaCa2	D13_3	0.01	1_D13_3_87	G1	52	32	320	5.33333	77.7181	77.7181	67.3507	1.15393
1	MIA PaCa2	D13_3	0.01	1_D13_3_87	G1	53	33	330	5.5	79.1941	79.1941	67.9219	1.16596
1	MIA PaCa2	D13_3	0.01	1_D13_3_87	G1	54	34	340	5.66667	78.9248	78.9248	68.0349	1.16006
1	MIA PaCa2	D13_3	0.01	1_D13_3_87	G1	55	35	350	5.83333	81.409	81.409	68.887	1.18178
1	MIA PaCa2	D13_3	0.01	1_D13_3_87	G1	56	36	360	6	78.7444	78.7444	68.1633	1.15523
1	MIA PaCa2	D13_3	0.01	1_D13_3_87	G1	57	37	370	6.16667	76.25	76.25	67.2471	1.13388
1	MIA PaCa2	D13_3	0.01	1_D13_3_87	G1	58	38	380	6.33333	75.7155	75.7155	67.1163	1.12812
1	MIA PaCa2	D13_3	0.01	1_D13_3_87	G1	59	39	390	6.5	75.2213	75.2213	66.9979	1.12274
1	MIA PaCa2	D13_3	0.01	1_D13_3_87	G1	60	40	400	6.66667	74.842	74.842	66.8466	1.11961
1	MIA PaCa2	D13_3	0.01	1_D13_3_87	G1	61	41	410	6.83333	77.0426	77.0426	66.872	1.15209
1	MIA PaCa2	D13_3	0.01	1_D13_3_87	G1	62	42	420	7	76.414	76.414	67.4151	1.13349
1	MIA PaCa2	D13_3	0.01	1_D13_3_87	G1	63	43	430	7.16667	77.9592	77.9592	66.593	1.17068
1	MIA PaCa2	D13_3	0.01	1_D13_3_87	G1	64	44	440	7.33333	73.5196	73.5196	64.9413	1.13209
1	MIA PaCa2	D13_3	0.01	1_D13_3_87	G1	65	45	450	7.5	73.9396	73.9396	65.8821	1.1223
1	MIA PaCa2	D13_3	0.01	1_D13_3_87	G1	66	46	460	7.66667	72.1214	72.1214	65.7717	1.09654
1	MIA PaCa2	D13_3	0.01	1_D13_3_87	G1	67	47	470	7.83333	68.0364	68.0364	65.9693	1.03133
1	MIA PaCa2	D13_3	0.01	1_D13_3_87	G1	68	48	480	8	69.4929	69.4929	65.2461	1.06509
1	MIA PaCa2	D13_3	0.01	1_D13_3_87	G1	69	49	490	8.16667	71	71	64.9541	1.09308
1	MIA PaCa2	D13_3	0.01	1_D13_3_87	G1	70	50	500	8.33333	72.2143	72.2143	64.7238	1.11573
1	MIA PaCa2	D13_3	0.01	1_D13_3_87	G1	71	51	510	8.5	70.79	70.79	64.8745	1.09118
1	MIA PaCa2	D13_3	0.01	1_D13_3_87	G1	72	52	520	8.66667	71.1717	71.1717	65.0075	1.09482
1	MIA PaCa2	D13_3	0.01	1_D13_3_87	G1	73	53	530	8.83333	68.4668	68.4668	64.3036	1.06474
1	MIA PaCa2	D13_3	0.01	1_D13_3_87	G1	74	54	540	9	71.8087	71.8087	64.0165	1.12172
1	MIA PaCa2	D13_3	0.01	1_D13_3_87	G1	75	55	550	9.16667	70.1688	70.1688	64.712	1.08432
1	MIA PaCa2	D13_3	0.01	1_D13_3_87	G1	76	56	560	9.33333	68.8987	68.8987	64.0422	1.07583
1	MIA PaCa2	D13_3	0.01	1_D13_3_87	G1	77	57	570	9.5	71.8995	71.8995	63.8764	1.1256
1	MIA PaCa2	D13_3	0.01	1_D13_3_87	G1	78	58	580	9.66667	73.4253	73.4253	63.7423	1.15191
1	MIA PaCa2	D13_3	0.01	1_D13_3_87	G1	79	59	590	9.83333	73.5937	73.5937	63.4249	1.16033
1	MIA PaCa2	D13_3	0.01	1_D13_3_87	G1	80	60	600	10	74.1611	74.1611	63.1512	1.17434
1	MIA PaCa2	D13_3	0.01	1_D13_3_87	G1	81	61	610	10.1667	73.5867	73.5867	63.2666	1.16312
1	MIA PaCa2	D13_3	0.01	1_D13_3_87	G1	82	62	620	10.3333	70.6061	70.6061	62.8471	1.12346
1	MIA PaCa2	D13_3	0.01	1_D13_3_87	G1	83	63	630	10.5	73.3422	73.3422	62.9485	1.16511
1	MIA PaCa2	D13_3	0.01	1_D13_3_87	G1	84	64	640	10.6667	71.0605	71.0605	63.5908	1.11747
1	MIA PaCa2	D13_3	0.01	1_D13_3_87	G1	85	65	650	10.8333	67.3351	67.3351	63.0209	1.06846
1	MIA PaCa2	D13_3	0.01	1_D13_3_87	G1	86	66	660	11	71.3517	71.3517	63.2933	1.12732
1	MIA PaCa2	D13_3	0.01	1_D13_3_87	G1	87	67	670	11.1667	65.1283	65.1283	61.9681	1.051
1	MIA PaCa2	D13_3	0.01	1_D13_3_87	G1	88	68	680	11.3333	69.8469	69.8469	61.0898	1.14335
1	MIA PaCa2	D13_3	0.01	1_D13_3_87	G1	89	69	690	11.5	67.836	67.836	61.5941	1.10134
1	MIA PaCa2	D13_3	0.01	1_D13_3_87	G1	90	70	700	11.6667	69.0284	69.0284	62.8735	1.09789
1	MIA PaCa2	D13_3	0.01	1_D13_3_87	G1	91	71	710	11.8333	63.7388	63.7388	61.5615	1.03537
1	MIA PaCa2	D13_3	0.01	1_D13_3_87	G1	92	72	720	12	64.2283	64.2283	60.7859	1.05663
1	MIA PaCa2	D13_3	0.01	1_D13_3_87	G1	93	73	730	12.1667	63.4402	63.4402	60.8609	1.04238
1	MIA PaCa2	D13_3	0.01	1_D13_3_87	G1	94	74	740	12.3333	67.3948	67.3948	60.9904	1.10501
1	MIA PaCa2	D13_3	0.01	1_D13_3_87	G1	95	75	750	12.5	67.2031	67.2031	61.556	1.09174
1	MIA PaCa2	D13_3	0.01	1_D13_3_87	G1	96	76	760	12.6667	66.8652	66.8652	61.3403	1.09007
1	MIA PaCa2	D13_3	0.01	1_D13_3_87	G1	97	77	770	12.8333	64.2447	64.2447	61.6391	1.04227
1	MIA PaCa2	D13_3	0.01	1_D13_3_87	G1	98	78	780	13	63.9258	63.9258	60.4758	1.05705
1	MIA PaCa2	D13_3	0.01	1_D13_3_87	G1	99	79	790	13.1667	64.2244	64.2244	60.3963	1.06338
1	MIA PaCa2	D13_3	0.01	1_D13_3_87	G1	100	80	800	13.3333	63.9805	63.9805	60.7884	1.05251
1	MIA PaCa2	D13_3	0.01	1_D13_3_87	G1	101	81	810	13.5	62.6423	62.6423	60.3059	1.03874
1	MIA PaCa2	D13_3	0.01	1_D13_3_87	G1	102	82	820	13.6667	70.6064	70.6064	60.7794	1.16168
1	MIA PaCa2	D13_3	0.01	1_D13_3_87	G1	103	83	830	13.8333	70.9602	70.9602	60.5056	1.17279
1	MIA PaCa2	D13_3	0.01	1_D13_3_87	G1	104	84	840	14	70.5582	70.5582	59.623	1.18341
1	MIA PaCa2	D13_3	0.01	1_D13_3_87	G1	105	85	850	14.1667	70.0412	70.0412	59.3892	1.17936
1	MIA PaCa2	D13_3	0.01	1_D13_3_87	G1	106	86	860	14.3333	72.5666	72.5666	59.9458	1.21054
1	MIA PaCa2	D13_3	0.01	1_D13_3_87	G1	107	87	870	14.5	69.0259	69.0259	59.293	1.16415
1	MIA PaCa2	D13_3	0.01	1_D13_3_87	G1	108	88	880	14.6667	71.565	71.565	59.7326	1.19809
1	MIA PaCa2	D13_3	0.01	1_D13_3_87	G1	109	89	890	14.8333	74.5528	74.5528	59.2145	1.25903
1	MIA PaCa2	D13_3	0.01	1_D13_3_87	G1	110	90	900	15	72.2363	72.2363	59.5265	1.21351
1	MIA PaCa2	D13_3	0.01	1_D13_3_87	G1	111	91	910	15.1667	68.7021	68.7021	22.61	3.03857
1	MIA PaCa2	D13_3	0.01	1_D13_3_87	G1	112	92	920	15.3333	26.0476	26.0476	22.6798	1.14849
1	MIA PaCa2	D13_3	0.01	1_D13_3_87	G1	113	93	930	15.5	24.7836	24.7836	22.7253	1.09058
1	MIA PaCa2	D13_3	0.01	1_D13_3_87	G1	114	94	940	15.6667	24.5576	24.5576	22.5639	1.08836
1	MIA PaCa2	D13_3	0.01	1_D13_3_87	G1	115	95	950	15.8333	25.3181	25.3181	22.4399	1.12826
1	MIA PaCa2	D13_3	0.01	1_D13_3_87	G1	116	96	960	16	26.9819	26.9819	22.771	1.18492
1	MIA PaCa2	D13_3	0.01	1_D13_3_87	G1	117	97	970	16.1667	25.8491	25.8491	22.6665	1.14041
1	MIA PaCa2	D13_3	0.01	1_D13_3_87	G1	118	98	980	16.3333	26.229	26.229	23.0617	1.13734
1	MIA PaCa2	D13_3	0.01	1_D13_3_87	G1	119	99	990	16.5	25.482	25.482	22.7043	1.12234
1	MIA PaCa2	D13_3	0.01	1_D13_3_87	G1	120	100	1000	16.6667	25.7089	25.7089	22.9546	1.11999
1	MIA PaCa2	D13_4	0.01	1_D13_4_5	G2	1	-19	-190	-3.16667	116.53	116.53	98.9025	1.17823
1	MIA PaCa2	D13_4	0.01	1_D13_4_5	G2	2	-18	-180	-3	120.623	120.623	98.287	1.22726
1	MIA PaCa2	D13_4	0.01	1_D13_4_5	G2	3	-17	-170	-2.83333	112.075	112.075	95.5639	1.17277
1	MIA PaCa2	D13_4	0.01	1_D13_4_5	G2	4	-16	-160	-2.66667	111.185	111.185	94.8279	1.17249
1	MIA PaCa2	D13_4	0.01	1_D13_4_5	G2	5	-15	-150	-2.5	108.781	108.781	93.7282	1.1606
1	MIA PaCa2	D13_4	0.01	1_D13_4_5	G2	6	-14	-140	-2.33333	110.156	110.156	91.2043	1.20779
1	MIA PaCa2	D13_4	0.01	1_D13_4_5	G2	7	-13	-130	-2.16667	105.691	105.691	91.0398	1.16094
1	MIA PaCa2	D13_4	0.01	1_D13_4_5	G2	8	-12	-120	-2	103.736	103.736	89.9628	1.1531
1	MIA PaCa2	D13_4	0.01	1_D13_4_5	G2	9	-11	-110	-1.83333	99.5061	99.5061	88.8498	1.11994
1	MIA PaCa2	D13_4	0.01	1_D13_4_5	G2	10	-10	-100	-1.66667	98.6831	98.6831	88.0257	1.12107
1	MIA PaCa2	D13_4	0.01	1_D13_4_5	G2	11	-9	-90	-1.5	96.8315	96.8315	87.39	1.10804
1	MIA PaCa2	D13_4	0.01	1_D13_4_5	G2	12	-8	-80	-1.33333	95.8202	95.8202	86.2825	1.11054
1	MIA PaCa2	D13_4	0.01	1_D13_4_5	G2	13	-7	-70	-1.16667	93.8733	93.8733	84.872	1.10606
1	MIA PaCa2	D13_4	0.01	1_D13_4_5	G2	14	-6	-60	-1	95.3952	95.3952	85.6506	1.11377
1	MIA PaCa2	D13_4	0.01	1_D13_4_5	G2	15	-5	-50	-0.833333	92.3994	92.3994	84.1405	1.09816
1	MIA PaCa2	D13_4	0.01	1_D13_4_5	G2	16	-4	-40	-0.666667	91.9971	91.9971	82.5286	1.11473
1	MIA PaCa2	D13_4	0.01	1_D13_4_5	G2	17	-3	-30	-0.5	92.3953	92.3953	83.098	1.11188
1	MIA PaCa2	D13_4	0.01	1_D13_4_5	G2	18	-2	-20	-0.333333	91.2072	91.2072	82.7797	1.10181
1	MIA PaCa2	D13_4	0.01	1_D13_4_5	G2	19	-1	-10	-0.166667	90.9256	90.9256	82.0129	1.10867
1	MIA PaCa2	D13_4	0.01	1_D13_4_5	G2	20	0	0	0	89.8	89.8	81.1847	1.10612
1	MIA PaCa2	D13_4	0.01	1_D13_4_5	G2	21	1	10	0.166667	93.2316	93.2316	84.5183	1.10309
1	MIA PaCa2	D13_4	0.01	1_D13_4_5	G2	22	2	20	0.333333	92.2733	92.2733	82.9015	1.11305
1	MIA PaCa2	D13_4	0.01	1_D13_4_5	G2	23	3	30	0.5	92.9075	92.9075	82.0655	1.13211
1	MIA PaCa2	D13_4	0.01	1_D13_4_5	G2	24	4	40	0.666667	91.8142	91.8142	80.9707	1.13392
1	MIA PaCa2	D13_4	0.01	1_D13_4_5	G2	25	5	50	0.833333	93.0295	93.0295	80.691	1.15291
1	MIA PaCa2	D13_4	0.01	1_D13_4_5	G2	26	6	60	1	92.6737	92.6737	79.6097	1.1641
1	MIA PaCa2	D13_4	0.01	1_D13_4_5	G2	27	7	70	1.16667	92.1047	92.1047	79.1117	1.16424
1	MIA PaCa2	D13_4	0.01	1_D13_4_5	G2	28	8	80	1.33333	92.3693	92.3693	78.0016	1.1842
1	MIA PaCa2	D13_4	0.01	1_D13_4_5	G2	29	9	90	1.5	96.5237	96.5237	77.8528	1.23982
1	MIA PaCa2	D13_4	0.01	1_D13_4_5	G2	30	10	100	1.66667	95.6962	95.6962	77.6698	1.23209
1	MIA PaCa2	D13_4	0.01	1_D13_4_5	G2	31	11	110	1.83333	102.374	102.374	77.1169	1.32752
1	MIA PaCa2	D13_4	0.01	1_D13_4_5	G2	32	12	120	2	106.953	106.953	76.7701	1.39316
1	MIA PaCa2	D13_4	0.01	1_D13_4_5	G2	33	13	130	2.16667	107.498	107.498	75.9843	1.41474
1	MIA PaCa2	D13_4	0.01	1_D13_4_5	G2	34	14	140	2.33333	109.253	109.253	75.0842	1.45508
1	MIA PaCa2	D13_4	0.01	1_D13_4_5	G2	35	15	150	2.5	111.094	111.094	75.707	1.46742
1	MIA PaCa2	D13_4	0.01	1_D13_4_5	G2	36	16	160	2.66667	109.734	109.734	74.2775	1.47735
1	MIA PaCa2	D13_4	0.01	1_D13_4_5	G2	37	17	170	2.83333	107.064	107.064	73.2738	1.46115
1	MIA PaCa2	D13_4	0.01	1_D13_4_5	G2	38	18	180	3	110.452	110.452	73.1743	1.50943
1	MIA PaCa2	D13_4	0.01	1_D13_4_5	G2	39	19	190	3.16667	106.923	106.923	72.5019	1.47476
1	MIA PaCa2	D13_4	0.01	1_D13_4_5	G2	40	20	200	3.33333	105.853	105.853	71.7669	1.47495
1	MIA PaCa2	D13_4	0.01	1_D13_4_5	G2	41	21	210	3.5	107.899	107.899	72.0161	1.49826
1	MIA PaCa2	D13_4	0.01	1_D13_4_62	G2	2	-18	-180	-3	132.051	132.051	98.287	1.34352
1	MIA PaCa2	D13_4	0.01	1_D13_4_62	G2	3	-17	-170	-2.83333	122.207	122.207	95.5639	1.2788
1	MIA PaCa2	D13_4	0.01	1_D13_4_62	G2	4	-16	-160	-2.66667	128.732	128.732	94.8279	1.35754
1	MIA PaCa2	D13_4	0.01	1_D13_4_62	G2	5	-15	-150	-2.5	116.918	116.918	93.7282	1.24742
1	MIA PaCa2	D13_4	0.01	1_D13_4_62	G2	6	-14	-140	-2.33333	110.791	110.791	91.2043	1.21475
1	MIA PaCa2	D13_4	0.01	1_D13_4_62	G2	7	-13	-130	-2.16667	109.395	109.395	91.0398	1.20162
1	MIA PaCa2	D13_4	0.01	1_D13_4_62	G2	8	-12	-120	-2	111.005	111.005	89.9628	1.2339
1	MIA PaCa2	D13_4	0.01	1_D13_4_62	G2	9	-11	-110	-1.83333	105.519	105.519	88.8498	1.18762
1	MIA PaCa2	D13_4	0.01	1_D13_4_62	G2	10	-10	-100	-1.66667	107.939	107.939	88.0257	1.22623
1	MIA PaCa2	D13_4	0.01	1_D13_4_62	G2	11	-9	-90	-1.5	118.192	118.192	87.39	1.35246
1	MIA PaCa2	D13_4	0.01	1_D13_4_62	G2	12	-8	-80	-1.33333	111.754	111.754	86.2825	1.29522
1	MIA PaCa2	D13_4	0.01	1_D13_4_62	G2	13	-7	-70	-1.16667	111.641	111.641	84.872	1.31541
1	MIA PaCa2	D13_4	0.01	1_D13_4_62	G2	14	-6	-60	-1	117.683	117.683	85.6506	1.37398
1	MIA PaCa2	D13_4	0.01	1_D13_4_62	G2	15	-5	-50	-0.833333	114	114	84.1405	1.35488
1	MIA PaCa2	D13_4	0.01	1_D13_4_62	G2	16	-4	-40	-0.666667	111.192	111.192	82.5286	1.34732
1	MIA PaCa2	D13_4	0.01	1_D13_4_62	G2	17	-3	-30	-0.5	104.566	104.566	83.098	1.25834
1	MIA PaCa2	D13_4	0.01	1_D13_4_62	G2	18	-2	-20	-0.333333	110.629	110.629	82.7797	1.33642
1	MIA PaCa2	D13_4	0.01	1_D13_4_62	G2	19	-1	-10	-0.166667	106.069	106.069	82.0129	1.29332
1	MIA PaCa2	D13_4	0.01	1_D13_4_62	G2	20	0	0	0	99.6211	99.6211	81.1847	1.22709
1	MIA PaCa2	D13_4	0.01	1_D13_4_62	G2	21	1	10	0.166667	112.326	112.326	84.5183	1.32901
1	MIA PaCa2	D13_4	0.01	1_D13_4_62	G2	22	2	20	0.333333	110.721	110.721	82.9015	1.33557
1	MIA PaCa2	D13_4	0.01	1_D13_4_62	G2	23	3	30	0.5	110.177	110.177	82.0655	1.34255
1	MIA PaCa2	D13_4	0.01	1_D13_4_62	G2	24	4	40	0.666667	104.797	104.797	80.9707	1.29426
1	MIA PaCa2	D13_4	0.01	1_D13_4_62	G2	25	5	50	0.833333	111.294	111.294	80.691	1.37927
1	MIA PaCa2	D13_4	0.01	1_D13_4_62	G2	26	6	60	1	105.305	105.305	79.6097	1.32276
1	MIA PaCa2	D13_4	0.01	1_D13_4_62	G2	27	7	70	1.16667	113.281	113.281	79.1117	1.43191
1	MIA PaCa2	D13_4	0.01	1_D13_4_62	G2	28	8	80	1.33333	110.603	110.603	78.0016	1.41796
1	MIA PaCa2	D13_4	0.01	1_D13_4_62	G2	29	9	90	1.5	114.276	114.276	77.8528	1.46785
1	MIA PaCa2	D13_4	0.01	1_D13_4_62	G2	30	10	100	1.66667	111.071	111.071	77.6698	1.43004
1	MIA PaCa2	D13_4	0.01	1_D13_4_62	G2	31	11	110	1.83333	116.311	116.311	77.1169	1.50824
1	MIA PaCa2	D13_4	0.01	1_D13_4_62	G2	32	12	120	2	107.495	107.495	76.7701	1.40022
1	MIA PaCa2	D13_4	0.01	1_D13_4_7	G2	0	-20	-200	-3.33333	119.808	119.808	102.696	1.16663
1	MIA PaCa2	D13_4	0.01	1_D13_4_7	G2	1	-19	-190	-3.16667	115.731	115.731	98.9025	1.17015
1	MIA PaCa2	D13_4	0.01	1_D13_4_7	G2	2	-18	-180	-3	111.385	111.385	98.287	1.13327
1	MIA PaCa2	D13_4	0.01	1_D13_4_7	G2	3	-17	-170	-2.83333	107.242	107.242	95.5639	1.1222
1	MIA PaCa2	D13_4	0.01	1_D13_4_7	G2	4	-16	-160	-2.66667	105.597	105.597	94.8279	1.11356
1	MIA PaCa2	D13_4	0.01	1_D13_4_7	G2	5	-15	-150	-2.5	110.145	110.145	93.7282	1.17516
1	MIA PaCa2	D13_4	0.01	1_D13_4_7	G2	6	-14	-140	-2.33333	109.292	109.292	91.2043	1.19832
1	MIA PaCa2	D13_4	0.01	1_D13_4_7	G2	7	-13	-130	-2.16667	107.499	107.499	91.0398	1.18079
1	MIA PaCa2	D13_4	0.01	1_D13_4_7	G2	8	-12	-120	-2	108.334	108.334	89.9628	1.20421
1	MIA PaCa2	D13_4	0.01	1_D13_4_7	G2	9	-11	-110	-1.83333	102.088	102.088	88.8498	1.149
1	MIA PaCa2	D13_4	0.01	1_D13_4_7	G2	10	-10	-100	-1.66667	101.152	101.152	88.0257	1.14912
1	MIA PaCa2	D13_4	0.01	1_D13_4_7	G2	11	-9	-90	-1.5	98.78	98.78	87.39	1.13033
1	MIA PaCa2	D13_4	0.01	1_D13_4_7	G2	12	-8	-80	-1.33333	96.9382	96.9382	86.2825	1.1235
1	MIA PaCa2	D13_4	0.01	1_D13_4_7	G2	13	-7	-70	-1.16667	94.6756	94.6756	84.872	1.11551
1	MIA PaCa2	D13_4	0.01	1_D13_4_7	G2	14	-6	-60	-1	95.1258	95.1258	85.6506	1.11063
1	MIA PaCa2	D13_4	0.01	1_D13_4_7	G2	15	-5	-50	-0.833333	92.2972	92.2972	84.1405	1.09694
1	MIA PaCa2	D13_4	0.01	1_D13_4_7	G2	16	-4	-40	-0.666667	94.8435	94.8435	82.5286	1.14922
1	MIA PaCa2	D13_4	0.01	1_D13_4_7	G2	17	-3	-30	-0.5	92.2515	92.2515	83.098	1.11015
1	MIA PaCa2	D13_4	0.01	1_D13_4_7	G2	18	-2	-20	-0.333333	92.6231	92.6231	82.7797	1.11891
1	MIA PaCa2	D13_4	0.01	1_D13_4_7	G2	19	-1	-10	-0.166667	93.3218	93.3218	82.0129	1.13789
1	MIA PaCa2	D13_4	0.01	1_D13_4_7	G2	20	0	0	0	94.4833	94.4833	81.1847	1.16381
1	MIA PaCa2	D13_4	0.01	1_D13_4_7	G2	21	1	10	0.166667	99.8714	99.8714	84.5183	1.18165
1	MIA PaCa2	D13_4	0.01	1_D13_4_7	G2	22	2	20	0.333333	98.1345	98.1345	82.9015	1.18375
1	MIA PaCa2	D13_4	0.01	1_D13_4_7	G2	23	3	30	0.5	95.25	95.25	82.0655	1.16066
1	MIA PaCa2	D13_4	0.01	1_D13_4_7	G2	24	4	40	0.666667	91.5726	91.5726	80.9707	1.13093
1	MIA PaCa2	D13_4	0.01	1_D13_4_7	G2	25	5	50	0.833333	95.3212	95.3212	80.691	1.18131
1	MIA PaCa2	D13_4	0.01	1_D13_4_7	G2	26	6	60	1	100.892	100.892	79.6097	1.26733
1	MIA PaCa2	D13_4	0.01	1_D13_4_7	G2	27	7	70	1.16667	97.8673	97.8673	79.1117	1.23708
1	MIA PaCa2	D13_4	0.01	1_D13_4_7	G2	28	8	80	1.33333	92.5016	92.5016	78.0016	1.18589
1	MIA PaCa2	D13_4	0.01	1_D13_4_7	G2	29	9	90	1.5	97.7575	97.7575	77.8528	1.25567
1	MIA PaCa2	D13_4	0.01	1_D13_4_7	G2	30	10	100	1.66667	97.6805	97.6805	77.6698	1.25764
1	MIA PaCa2	D13_4	0.01	1_D13_4_7	G2	31	11	110	1.83333	92.6237	92.6237	77.1169	1.20108
1	MIA PaCa2	D13_4	0.01	1_D13_4_7	G2	32	12	120	2	99.969	99.969	76.7701	1.30219
1	MIA PaCa2	D13_4	0.01	1_D13_4_7	G2	33	13	130	2.16667	101.492	101.492	75.9843	1.3357
1	MIA PaCa2	D13_4	0.01	1_D13_4_7	G2	34	14	140	2.33333	94.2847	94.2847	75.0842	1.25572
1	MIA PaCa2	D13_4	0.01	1_D13_4_7	G2	35	15	150	2.5	97.1532	97.1532	75.707	1.28328
1	MIA PaCa2	D13_4	0.01	1_D13_4_7	G2	36	16	160	2.66667	98.1145	98.1145	74.2775	1.32092
1	MIA PaCa2	D13_4	0.01	1_D13_4_7	G2	37	17	170	2.83333	109.44	109.44	73.2738	1.49357
1	MIA PaCa2	D13_4	0.01	1_D13_4_7	G2	38	18	180	3	107.657	107.657	73.1743	1.47125
1	MIA PaCa2	D13_4	0.01	1_D13_4_7	G2	39	19	190	3.16667	103.135	103.135	72.5019	1.42251
1	MIA PaCa2	D13_4	0.01	1_D13_4_7	G2	40	20	200	3.33333	110.108	110.108	71.7669	1.53424
1	MIA PaCa2	D13_4	0.01	1_D13_4_7	G2	41	21	210	3.5	102.925	102.925	72.0161	1.4292
1	MIA PaCa2	D13_4	0.01	1_D13_4_7	G2	42	22	220	3.66667	98.529	98.529	71.8185	1.37192
1	MIA PaCa2	D13_4	0.01	1_D13_4_7	G2	43	23	230	3.83333	89.7449	89.7449	71.1314	1.26168
1	MIA PaCa2	D13_4	0.01	1_D13_4_7	G2	44	24	240	4	100.357	100.357	70.5922	1.42164
1	MIA PaCa2	D14_1	0.01	1_D14_1_16	S	0	-20	-200	-3.33333	93.9766	93.9766	102.696	0.915095
1	MIA PaCa2	D14_1	0.01	1_D14_1_16	S	1	-19	-190	-3.16667	91.9184	91.9184	98.9025	0.929384
1	MIA PaCa2	D14_1	0.01	1_D14_1_16	S	2	-18	-180	-3	90.8951	90.8951	98.287	0.924792
1	MIA PaCa2	D14_1	0.01	1_D14_1_16	S	3	-17	-170	-2.83333	87.3608	87.3608	95.5639	0.914161
1	MIA PaCa2	D14_1	0.01	1_D14_1_16	S	4	-16	-160	-2.66667	88.237	88.237	94.8279	0.930496
1	MIA PaCa2	D14_1	0.01	1_D14_1_16	S	5	-15	-150	-2.5	87.4919	87.4919	93.7282	0.933464
1	MIA PaCa2	D14_1	0.01	1_D14_1_16	S	6	-14	-140	-2.33333	84.5619	84.5619	91.2043	0.92717
1	MIA PaCa2	D14_1	0.01	1_D14_1_16	S	7	-13	-130	-2.16667	83.2263	83.2263	91.0398	0.914175
1	MIA PaCa2	D14_1	0.01	1_D14_1_16	S	8	-12	-120	-2	82.8459	82.8459	89.9628	0.920891
1	MIA PaCa2	D14_1	0.01	1_D14_1_16	S	9	-11	-110	-1.83333	82.2945	82.2945	88.8498	0.926221
1	MIA PaCa2	D14_1	0.01	1_D14_1_16	S	10	-10	-100	-1.66667	81.9752	81.9752	88.0257	0.931264
1	MIA PaCa2	D14_1	0.01	1_D14_1_16	S	11	-9	-90	-1.5	78.6063	78.6063	87.39	0.899488
1	MIA PaCa2	D14_1	0.01	1_D14_1_16	S	12	-8	-80	-1.33333	76.877	76.877	86.2825	0.890991
1	MIA PaCa2	D14_1	0.01	1_D14_1_16	S	13	-7	-70	-1.16667	74.1858	74.1858	84.872	0.87409
1	MIA PaCa2	D14_1	0.01	1_D14_1_16	S	14	-6	-60	-1	76.0603	76.0603	85.6506	0.88803
1	MIA PaCa2	D14_1	0.01	1_D14_1_16	S	15	-5	-50	-0.833333	77.5069	77.5069	84.1405	0.921161
1	MIA PaCa2	D14_1	0.01	1_D14_1_16	S	16	-4	-40	-0.666667	74.7761	74.7761	82.5286	0.906063
1	MIA PaCa2	D14_1	0.01	1_D14_1_16	S	17	-3	-30	-0.5	74.2368	74.2368	83.098	0.893365
1	MIA PaCa2	D14_1	0.01	1_D14_1_16	S	18	-2	-20	-0.333333	74.0727	74.0727	82.7797	0.894817
1	MIA PaCa2	D14_1	0.01	1_D14_1_16	S	19	-1	-10	-0.166667	73.0563	73.0563	82.0129	0.89079
1	MIA PaCa2	D14_1	0.01	1_D14_1_16	S	20	0	0	0	73.1463	73.1463	81.1847	0.900986
1	MIA PaCa2	D14_1	0.01	1_D14_1_16	S	21	1	10	0.166667	77.5341	77.5341	84.5183	0.917365
1	MIA PaCa2	D14_1	0.01	1_D14_1_16	S	22	2	20	0.333333	77.8198	77.8198	82.9015	0.938702
1	MIA PaCa2	D14_1	0.01	1_D14_1_16	S	23	3	30	0.5	78.3275	78.3275	82.0655	0.954451
1	MIA PaCa2	D14_1	0.01	1_D14_1_16	S	24	4	40	0.666667	76.9051	76.9051	80.9707	0.949789
1	MIA PaCa2	D14_1	0.01	1_D14_1_16	S	25	5	50	0.833333	78.0196	78.0196	80.691	0.966894
1	MIA PaCa2	D14_1	0.01	1_D14_1_16	S	26	6	60	1	78.9119	78.9119	79.6097	0.991235
1	MIA PaCa2	D14_1	0.01	1_D14_1_16	S	27	7	70	1.16667	76.4378	76.4378	79.1117	0.966201
1	MIA PaCa2	D14_1	0.01	1_D14_1_16	S	28	8	80	1.33333	73.8085	73.8085	78.0016	0.946244
1	MIA PaCa2	D14_1	0.01	1_D14_1_16	S	29	9	90	1.5	72.0534	72.0534	77.8528	0.925508
1	MIA PaCa2	D14_1	0.01	1_D14_1_16	S	30	10	100	1.66667	72.1727	72.1727	77.6698	0.929224
1	MIA PaCa2	D14_1	0.01	1_D14_1_16	S	31	11	110	1.83333	72.9722	72.9722	77.1169	0.946254
1	MIA PaCa2	D14_1	0.01	1_D14_1_16	S	32	12	120	2	72.0407	72.0407	76.7701	0.938396
1	MIA PaCa2	D14_1	0.01	1_D14_1_16	S	33	13	130	2.16667	72.1798	72.1798	75.9843	0.94993
1	MIA PaCa2	D14_1	0.01	1_D14_1_16	S	34	14	140	2.33333	72.5197	72.5197	75.0842	0.965845
1	MIA PaCa2	D14_1	0.01	1_D14_1_16	S	35	15	150	2.5	71.6526	71.6526	75.707	0.946446
1	MIA PaCa2	D14_1	0.01	1_D14_1_16	S	36	16	160	2.66667	70.6746	70.6746	74.2775	0.951493
1	MIA PaCa2	D14_1	0.01	1_D14_1_16	S	37	17	170	2.83333	68.3486	68.3486	73.2738	0.932783
1	MIA PaCa2	D14_1	0.01	1_D14_1_16	S	38	18	180	3	67.9808	67.9808	73.1743	0.929026
1	MIA PaCa2	D14_1	0.01	1_D14_1_16	S	39	19	190	3.16667	69.4608	69.4608	72.5019	0.958054
1	MIA PaCa2	D14_1	0.01	1_D14_1_16	S	40	20	200	3.33333	66.5459	66.5459	71.7669	0.927251
1	MIA PaCa2	D14_1	0.01	1_D14_1_16	S	41	21	210	3.5	66.9192	66.9192	72.0161	0.929225
1	MIA PaCa2	D14_1	0.01	1_D14_1_16	S	42	22	220	3.66667	67.9876	67.9876	71.8185	0.946658
1	MIA PaCa2	D14_1	0.01	1_D14_1_16	S	43	23	230	3.83333	67.8926	67.8926	71.1314	0.954467
1	MIA PaCa2	D14_1	0.01	1_D14_1_16	S	44	24	240	4	67.5206	67.5206	70.5922	0.956488
1	MIA PaCa2	D14_1	0.01	1_D14_1_16	S	45	25	250	4.16667	67.0262	67.0262	70.3088	0.953312
1	MIA PaCa2	D14_1	0.01	1_D14_1_16	S	46	26	260	4.33333	66.4096	66.4096	70.5953	0.940708
1	MIA PaCa2	D14_1	0.01	1_D14_1_16	S	47	27	270	4.5	66.7507	66.7507	70.0862	0.952409
1	MIA PaCa2	D14_1	0.01	1_D14_1_16	S	48	28	280	4.66667	65.5755	65.5755	69.4746	0.943877
1	MIA PaCa2	D14_1	0.01	1_D14_1_16	S	49	29	290	4.83333	66.0237	66.0237	68.6304	0.962018
1	MIA PaCa2	D14_1	0.01	1_D14_1_16	S	50	30	300	5	64.8852	64.8852	68.8548	0.942348
1	MIA PaCa2	D14_1	0.01	1_D14_1_16	S	51	31	310	5.16667	63.062	63.062	68.1679	0.925098
1	MIA PaCa2	D14_1	0.01	1_D14_1_16	S	52	32	320	5.33333	60.2551	60.2551	67.3507	0.894647
1	MIA PaCa2	D14_1	0.01	1_D14_1_16	S	53	33	330	5.5	61.352	61.352	67.9219	0.903272
1	MIA PaCa2	D14_1	0.01	1_D14_1_16	S	54	34	340	5.66667	60.629	60.629	68.0349	0.891145
1	MIA PaCa2	D14_1	0.01	1_D14_1_16	S	55	35	350	5.83333	62.481	62.481	68.887	0.907007
1	MIA PaCa2	D14_1	0.01	1_D14_1_16	S	56	36	360	6	61.8242	61.8242	68.1633	0.907001
1	MIA PaCa2	D14_1	0.01	1_D14_1_16	S	57	37	370	6.16667	60.1484	60.1484	67.2471	0.894438
1	MIA PaCa2	D14_1	0.01	1_D14_1_16	S	58	38	380	6.33333	61.266	61.266	67.1163	0.912834
1	MIA PaCa2	D14_1	0.01	1_D14_1_16	S	59	39	390	6.5	60.5611	60.5611	66.9979	0.903926
1	MIA PaCa2	D14_1	0.01	1_D14_1_16	S	60	40	400	6.66667	60.0411	60.0411	66.8466	0.898192
1	MIA PaCa2	D14_1	0.01	1_D14_1_16	S	61	41	410	6.83333	61.0024	61.0024	66.872	0.912226
1	MIA PaCa2	D14_1	0.01	1_D14_1_16	S	62	42	420	7	61.4621	61.4621	67.4151	0.911697
1	MIA PaCa2	D14_1	0.01	1_D14_1_16	S	63	43	430	7.16667	61.9945	61.9945	66.593	0.930946
1	MIA PaCa2	D14_1	0.01	1_D14_1_16	S	64	44	440	7.33333	60.0597	60.0597	64.9413	0.924831
1	MIA PaCa2	D14_1	0.01	1_D14_1_16	S	65	45	450	7.5	62.0814	62.0814	65.8821	0.94231
1	MIA PaCa2	D14_1	0.01	1_D14_1_16	S	66	46	460	7.66667	61.7374	61.7374	65.7717	0.938663
1	MIA PaCa2	D14_1	0.01	1_D14_1_16	S	67	47	470	7.83333	61.6532	61.6532	65.9693	0.934574
1	MIA PaCa2	D14_1	0.01	1_D14_1_16	S	68	48	480	8	60.4121	60.4121	65.2461	0.925911
1	MIA PaCa2	D14_1	0.01	1_D14_1_21	S	0	-20	-200	-3.33333	109.491	109.491	102.696	1.06616
1	MIA PaCa2	D14_1	0.01	1_D14_1_21	S	1	-19	-190	-3.16667	99.5744	99.5744	98.9025	1.00679
1	MIA PaCa2	D14_1	0.01	1_D14_1_21	S	2	-18	-180	-3	95.1121	95.1121	98.287	0.967697
1	MIA PaCa2	D14_1	0.01	1_D14_1_21	S	3	-17	-170	-2.83333	91.7243	91.7243	95.5639	0.959822
1	MIA PaCa2	D14_1	0.01	1_D14_1_21	S	4	-16	-160	-2.66667	87.4017	87.4017	94.8279	0.921687
1	MIA PaCa2	D14_1	0.01	1_D14_1_21	S	5	-15	-150	-2.5	87.7761	87.7761	93.7282	0.936496
1	MIA PaCa2	D14_1	0.01	1_D14_1_21	S	6	-14	-140	-2.33333	84.8317	84.8317	91.2043	0.930128
1	MIA PaCa2	D14_1	0.01	1_D14_1_21	S	7	-13	-130	-2.16667	84.203	84.203	91.0398	0.924904
1	MIA PaCa2	D14_1	0.01	1_D14_1_21	S	8	-12	-120	-2	81.8942	81.8942	89.9628	0.910312
1	MIA PaCa2	D14_1	0.01	1_D14_1_21	S	9	-11	-110	-1.83333	81.1446	81.1446	88.8498	0.913279
1	MIA PaCa2	D14_1	0.01	1_D14_1_21	S	10	-10	-100	-1.66667	78.8504	78.8504	88.0257	0.895766
1	MIA PaCa2	D14_1	0.01	1_D14_1_21	S	11	-9	-90	-1.5	79.6971	79.6971	87.39	0.91197
1	MIA PaCa2	D14_1	0.01	1_D14_1_21	S	12	-8	-80	-1.33333	79.5973	79.5973	86.2825	0.922519
1	MIA PaCa2	D14_1	0.01	1_D14_1_21	S	13	-7	-70	-1.16667	77.8083	77.8083	84.872	0.916772
1	MIA PaCa2	D14_1	0.01	1_D14_1_21	S	14	-6	-60	-1	78.3257	78.3257	85.6506	0.914479
1	MIA PaCa2	D14_1	0.01	1_D14_1_21	S	15	-5	-50	-0.833333	75.9804	75.9804	84.1405	0.903019
1	MIA PaCa2	D14_1	0.01	1_D14_1_21	S	16	-4	-40	-0.666667	76.1532	76.1532	82.5286	0.92275
1	MIA PaCa2	D14_1	0.01	1_D14_1_21	S	17	-3	-30	-0.5	73.7417	73.7417	83.098	0.887407
1	MIA PaCa2	D14_1	0.01	1_D14_1_21	S	18	-2	-20	-0.333333	71.6239	71.6239	82.7797	0.865235
1	MIA PaCa2	D14_1	0.01	1_D14_1_21	S	19	-1	-10	-0.166667	72.4925	72.4925	82.0129	0.883916
1	MIA PaCa2	D14_1	0.01	1_D14_1_21	S	20	0	0	0	71.5901	71.5901	81.1847	0.881817
1	MIA PaCa2	D14_1	0.01	1_D14_1_21	S	21	1	10	0.166667	78.1185	78.1185	84.5183	0.924279
1	MIA PaCa2	D14_1	0.01	1_D14_1_21	S	22	2	20	0.333333	75.2531	75.2531	82.9015	0.907741
1	MIA PaCa2	D14_1	0.01	1_D14_1_21	S	23	3	30	0.5	74.9033	74.9033	82.0655	0.912725
1	MIA PaCa2	D14_1	0.01	1_D14_1_21	S	24	4	40	0.666667	72.7433	72.7433	80.9707	0.89839
1	MIA PaCa2	D14_1	0.01	1_D14_1_21	S	25	5	50	0.833333	73.6448	73.6448	80.691	0.912677
1	MIA PaCa2	D14_1	0.01	1_D14_1_21	S	26	6	60	1	74.4475	74.4475	79.6097	0.935156
1	MIA PaCa2	D14_1	0.01	1_D14_1_21	S	27	7	70	1.16667	74.0031	74.0031	79.1117	0.935426
1	MIA PaCa2	D14_1	0.01	1_D14_1_21	S	28	8	80	1.33333	71.4186	71.4186	78.0016	0.915605
1	MIA PaCa2	D14_1	0.01	1_D14_1_21	S	29	9	90	1.5	69.7335	69.7335	77.8528	0.89571
1	MIA PaCa2	D14_1	0.01	1_D14_1_21	S	32	12	120	2	74.9914	74.9914	76.7701	0.976831
1	MIA PaCa2	D14_1	0.01	1_D14_1_21	S	34	14	140	2.33333	66.5494	66.5494	75.0842	0.88633
1	MIA PaCa2	D14_1	0.01	1_D14_1_21	S	36	16	160	2.66667	71.6512	71.6512	74.2775	0.964641
1	MIA PaCa2	D14_1	0.01	1_D14_1_21	S	38	18	180	3	71.171	71.171	73.1743	0.972623
1	MIA PaCa2	D14_1	0.01	1_D14_1_21	S	39	19	190	3.16667	70.5783	70.5783	72.5019	0.973468
1	MIA PaCa2	D14_1	0.01	1_D14_1_21	S	40	20	200	3.33333	67.9201	67.9201	71.7669	0.946399
1	MIA PaCa2	D14_1	0.01	1_D14_1_21	S	41	21	210	3.5	68.4551	68.4551	72.0161	0.950552
1	MIA PaCa2	D14_1	0.01	1_D14_1_21	S	42	22	220	3.66667	68.2216	68.2216	71.8185	0.949916
1	MIA PaCa2	D14_1	0.01	1_D14_1_21	S	43	23	230	3.83333	67.3805	67.3805	71.1314	0.947268
1	MIA PaCa2	D14_1	0.01	1_D14_1_21	S	44	24	240	4	65.8295	65.8295	70.5922	0.932532
1	MIA PaCa2	D14_1	0.01	1_D14_1_21	S	45	25	250	4.16667	66.295	66.295	70.3088	0.942912
1	MIA PaCa2	D14_1	0.01	1_D14_1_21	S	46	26	260	4.33333	66.0556	66.0556	70.5953	0.935694
1	MIA PaCa2	D14_1	0.01	1_D14_1_21	S	47	27	270	4.5	69.4841	69.4841	70.0862	0.99141
1	MIA PaCa2	D14_1	0.01	1_D14_1_21	S	48	28	280	4.66667	72.538	72.538	69.4746	1.04409
1	MIA PaCa2	D14_1	0.01	1_D14_1_21	S	49	29	290	4.83333	70.5625	70.5625	68.6304	1.02815
1	MIA PaCa2	D14_1	0.01	1_D14_1_21	S	50	30	300	5	68.2389	68.2389	68.8548	0.991055
1	MIA PaCa2	D14_1	0.01	1_D14_1_21	S	51	31	310	5.16667	70.0306	70.0306	68.1679	1.02733
1	MIA PaCa2	D14_1	0.01	1_D14_1_21	S	52	32	320	5.33333	79.0033	79.0033	67.3507	1.17301
1	MIA PaCa2	D14_1	0.01	1_D14_1_21	S	53	33	330	5.5	77.9021	77.9021	67.9219	1.14694
1	MIA PaCa2	D14_1	0.01	1_D14_1_21	S	54	34	340	5.66667	72.6498	72.6498	68.0349	1.06783
1	MIA PaCa2	D14_1	0.01	1_D14_1_21	S	55	35	350	5.83333	78.1541	78.1541	68.887	1.13453
1	MIA PaCa2	D14_1	0.01	1_D14_1_21	S	56	36	360	6	74.717	74.717	68.1633	1.09615
1	MIA PaCa2	D14_1	0.01	1_D14_1_21	S	57	37	370	6.16667	73.6361	73.6361	67.2471	1.09501
1	MIA PaCa2	D14_1	0.01	1_D14_1_21	S	58	38	380	6.33333	75.9966	75.9966	67.1163	1.13231
1	MIA PaCa2	D14_1	0.01	1_D14_1_21	S	59	39	390	6.5	72.7726	72.7726	66.9979	1.08619
1	MIA PaCa2	D14_1	0.01	1_D14_1_21	S	60	40	400	6.66667	74.4463	74.4463	66.8466	1.11369
1	MIA PaCa2	D14_1	0.01	1_D14_1_21	S	61	41	410	6.83333	76.6846	76.6846	66.872	1.14674
1	MIA PaCa2	D14_1	0.01	1_D14_1_21	S	62	42	420	7	71.2716	71.2716	67.4151	1.05721
1	MIA PaCa2	D14_1	0.01	1_D14_1_21	S	63	43	430	7.16667	73.1037	73.1037	66.593	1.09777
1	MIA PaCa2	D14_1	0.01	1_D14_1_21	S	64	44	440	7.33333	74.7267	74.7267	64.9413	1.15068
1	MIA PaCa2	D14_1	0.01	1_D14_1_9	S	16	-4	-40	-0.666667	74.3005	74.3005	82.5286	0.900301
1	MIA PaCa2	D14_1	0.01	1_D14_1_9	S	17	-3	-30	-0.5	75.3946	75.3946	83.098	0.907298
1	MIA PaCa2	D14_1	0.01	1_D14_1_9	S	19	-1	-10	-0.166667	70.2486	70.2486	82.0129	0.856556
1	MIA PaCa2	D14_1	0.01	1_D14_1_9	S	20	0	0	0	71.0106	71.0106	81.1847	0.874679
1	MIA PaCa2	D14_1	0.01	1_D14_1_9	S	21	1	10	0.166667	76.9561	76.9561	84.5183	0.910526
1	MIA PaCa2	D14_1	0.01	1_D14_1_9	S	22	2	20	0.333333	74.2434	74.2434	82.9015	0.895561
1	MIA PaCa2	D14_1	0.01	1_D14_1_9	S	23	3	30	0.5	76.5606	76.5606	82.0655	0.93292
1	MIA PaCa2	D14_1	0.01	1_D14_1_9	S	24	4	40	0.666667	72.94	72.94	80.9707	0.900819
1	MIA PaCa2	D14_1	0.01	1_D14_1_9	S	25	5	50	0.833333	75.8488	75.8488	80.691	0.939991
1	MIA PaCa2	D14_1	0.01	1_D14_1_9	S	26	6	60	1	73.2271	73.2271	79.6097	0.919826
1	MIA PaCa2	D14_1	0.01	1_D14_1_9	S	27	7	70	1.16667	70.9841	70.9841	79.1117	0.897265
1	MIA PaCa2	D14_1	0.01	1_D14_1_9	S	28	8	80	1.33333	70.1542	70.1542	78.0016	0.899395
1	MIA PaCa2	D14_1	0.01	1_D14_1_9	S	29	9	90	1.5	69.766	69.766	77.8528	0.896127
1	MIA PaCa2	D14_1	0.01	1_D14_1_9	S	30	10	100	1.66667	69.8731	69.8731	77.6698	0.899617
1	MIA PaCa2	D14_1	0.01	1_D14_1_9	S	31	11	110	1.83333	72.2648	72.2648	77.1169	0.937081
1	MIA PaCa2	D14_1	0.01	1_D14_1_9	S	32	12	120	2	70.972	70.972	76.7701	0.924475
1	MIA PaCa2	D14_1	0.01	1_D14_1_9	S	33	13	130	2.16667	71.427	71.427	75.9843	0.940023
1	MIA PaCa2	D14_1	0.01	1_D14_1_9	S	34	14	140	2.33333	71.7148	71.7148	75.0842	0.955125
1	MIA PaCa2	D14_1	0.01	1_D14_1_9	S	35	15	150	2.5	68.979	68.979	75.707	0.911131
1	MIA PaCa2	D14_1	0.01	1_D14_1_9	S	36	16	160	2.66667	65.9138	65.9138	74.2775	0.887399
1	MIA PaCa2	D14_1	0.01	1_D14_1_9	S	37	17	170	2.83333	67.6036	67.6036	73.2738	0.922616
1	MIA PaCa2	D14_1	0.01	1_D14_1_9	S	38	18	180	3	68.2432	68.2432	73.1743	0.932612
1	MIA PaCa2	D14_1	0.01	1_D14_1_9	S	39	19	190	3.16667	66.8197	66.8197	72.5019	0.921626
1	MIA PaCa2	D14_1	0.01	1_D14_1_9	S	40	20	200	3.33333	69.202	69.202	71.7669	0.964261
1	MIA PaCa2	D14_1	0.01	1_D14_1_9	S	41	21	210	3.5	69.7938	69.7938	72.0161	0.969141
1	MIA PaCa2	D14_1	0.01	1_D14_1_9	S	42	22	220	3.66667	69.5451	69.5451	71.8185	0.968345
1	MIA PaCa2	D14_1	0.01	1_D14_1_9	S	43	23	230	3.83333	70.0197	70.0197	71.1314	0.984371
1	MIA PaCa2	D14_1	0.01	1_D14_1_9	S	44	24	240	4	68.7411	68.7411	70.5922	0.973778
1	MIA PaCa2	D14_1	0.01	1_D14_1_9	S	45	25	250	4.16667	68.9305	68.9305	70.3088	0.980396
1	MIA PaCa2	D14_1	0.01	1_D14_1_9	S	46	26	260	4.33333	66.9966	66.9966	70.5953	0.949023
1	MIA PaCa2	D14_1	0.01	1_D14_1_9	S	47	27	270	4.5	66.1003	66.1003	70.0862	0.943129
1	MIA PaCa2	D14_1	0.01	1_D14_1_9	S	48	28	280	4.66667	65.3183	65.3183	69.4746	0.940175
1	MIA PaCa2	D14_1	0.01	1_D14_1_9	S	49	29	290	4.83333	66.981	66.981	68.6304	0.975967
1	MIA PaCa2	D14_1	0.01	1_D14_1_9	S	50	30	300	5	67.1295	67.1295	68.8548	0.974942
1	MIA PaCa2	D14_1	0.01	1_D14_1_9	S	51	31	310	5.16667	63.943	63.943	68.1679	0.938022
1	MIA PaCa2	D14_1	0.01	1_D14_1_9	S	52	32	320	5.33333	67.432	67.432	67.3507	1.00121
1	MIA PaCa2	D14_1	0.01	1_D14_1_9	S	53	33	330	5.5	69.1863	69.1863	67.9219	1.01861
1	MIA PaCa2	D14_1	0.01	1_D14_1_9	S	54	34	340	5.66667	67.4803	67.4803	68.0349	0.991848
1	MIA PaCa2	D14_1	0.01	1_D14_1_9	S	55	35	350	5.83333	65.0602	65.0602	68.887	0.944448
1	MIA PaCa2	D14_1	0.01	1_D14_1_9	S	56	36	360	6	64.6223	64.6223	68.1633	0.948051
1	MIA PaCa2	D14_1	0.01	1_D14_1_9	S	57	37	370	6.16667	65.0804	65.0804	67.2471	0.967779
1	MIA PaCa2	D14_1	0.01	1_D14_1_9	S	58	38	380	6.33333	64.898	64.898	67.1163	0.966949
1	MIA PaCa2	D14_1	0.01	1_D14_1_9	S	59	39	390	6.5	63.8301	63.8301	66.9979	0.952718
1	MIA PaCa2	D14_1	0.01	1_D14_1_9	S	60	40	400	6.66667	63.6738	63.6738	66.8466	0.952535
1	MIA PaCa2	D14_1	0.01	1_D14_1_9	S	61	41	410	6.83333	64.2102	64.2102	66.872	0.960196
1	MIA PaCa2	D14_1	0.01	1_D14_1_9	S	62	42	420	7	62.2222	62.2222	67.4151	0.922971
1	MIA PaCa2	D14_1	0.01	1_D14_1_9	S	63	43	430	7.16667	62.9043	62.9043	66.593	0.944608
1	MIA PaCa2	D14_1	0.01	1_D14_1_9	S	64	44	440	7.33333	61.35	61.35	64.9413	0.944699
1	MIA PaCa2	D14_1	0.01	1_D14_1_9	S	65	45	450	7.5	63.1024	63.1024	65.8821	0.957808
1	MIA PaCa2	D14_1	0.01	1_D14_1_9	S	66	46	460	7.66667	63.9933	63.9933	65.7717	0.972962
1	MIA PaCa2	D14_1	0.01	1_D14_1_9	S	67	47	470	7.83333	62.6055	62.6055	65.9693	0.94901
1	MIA PaCa2	D14_1	0.01	1_D14_1_9	S	68	48	480	8	61.4651	61.4651	65.2461	0.94205
1	MIA PaCa2	D14_1	0.01	1_D14_1_9	S	69	49	490	8.16667	58.9281	58.9281	64.9541	0.907226
1	MIA PaCa2	D14_1	0.01	1_D14_1_9	S	70	50	500	8.33333	58.6076	58.6076	64.7238	0.905503
1	MIA PaCa2	D14_1	0.01	1_D14_1_9	S	71	51	510	8.5	60.5144	60.5144	64.8745	0.932792
1	MIA PaCa2	D14_1	0.01	1_D14_1_9	S	72	52	520	8.66667	61.3158	61.3158	65.0075	0.943211
1	MIA PaCa2	D14_1	0.01	1_D14_1_9	S	73	53	530	8.83333	63.2801	63.2801	64.3036	0.984083
1	MIA PaCa2	D14_1	0.01	1_D14_1_9	S	74	54	540	9	61.5759	61.5759	64.0165	0.961876
1	MIA PaCa2	D14_1	0.01	1_D14_1_9	S	75	55	550	9.16667	61.966	61.966	64.712	0.957566
1	MIA PaCa2	D14_1	0.01	1_D14_1_9	S	76	56	560	9.33333	61.3221	61.3221	64.0422	0.957526
1	MIA PaCa2	D14_1	0.01	1_D14_1_9	S	77	57	570	9.5	60.6053	60.6053	63.8764	0.94879
1	MIA PaCa2	D14_1	0.01	1_D14_1_9	S	78	58	580	9.66667	60.0392	60.0392	63.7423	0.941906
1	MIA PaCa2	D14_1	0.01	1_D14_1_9	S	79	59	590	9.83333	58.645	58.645	63.4249	0.924637
1	MIA PaCa2	D14_1	0.01	1_D14_1_9	S	80	60	600	10	59.8261	59.8261	63.1512	0.947347
1	MIA PaCa2	D14_1	0.01	1_D14_1_9	S	81	61	610	10.1667	57.9468	57.9468	63.2666	0.915915
1	MIA PaCa2	D14_1	0.01	1_D14_1_9	S	82	62	620	10.3333	59.9192	59.9192	62.8471	0.953412
1	MIA PaCa2	D14_1	0.01	1_D14_1_9	S	83	63	630	10.5	60.3389	60.3389	62.9485	0.958543
1	MIA PaCa2	D14_1	0.01	1_D14_1_9	S	84	64	640	10.6667	60.4242	60.4242	63.5908	0.950204
1	MIA PaCa2	D14_1	0.01	1_D14_1_9	S	85	65	650	10.8333	60.0627	60.0627	63.0209	0.953059
1	MIA PaCa2	D14_1	0.01	1_D14_1_9	S	86	66	660	11	60.955	60.955	63.2933	0.963056
1	MIA PaCa2	D14_1	0.01	1_D14_1_9	S	87	67	670	11.1667	59.8333	59.8333	61.9681	0.96555
1	MIA PaCa2	D14_1	0.01	1_D14_1_9	S	88	68	680	11.3333	57.7801	57.7801	61.0898	0.945823
1	MIA PaCa2	D14_1	0.01	1_D14_1_9	S	89	69	690	11.5	57.5651	57.5651	61.5941	0.934588
1	MIA PaCa2	D14_1	0.01	1_D14_1_9	S	90	70	700	11.6667	57.51	57.51	62.8735	0.914694
1	MIA PaCa2	D14_1	0.01	1_D14_1_9	S	91	71	710	11.8333	58.3741	58.3741	61.5615	0.948225
1	MIA PaCa2	D14_1	0.01	1_D14_1_9	S	92	72	720	12	59.6135	59.6135	60.7859	0.980712
1	MIA PaCa2	D14_1	0.01	1_D14_1_9	S	93	73	730	12.1667	58.5315	58.5315	60.8609	0.961726
1	MIA PaCa2	D14_1	0.01	1_D14_1_9	S	94	74	740	12.3333	59.656	59.656	60.9904	0.978122
1	MIA PaCa2	D14_1	0.01	1_D14_1_9	S	95	75	750	12.5	60.5199	60.5199	61.556	0.983168
1	MIA PaCa2	D14_1	0.01	1_D14_1_9	S	96	76	760	12.6667	60.9513	60.9513	61.3403	0.993658
1	MIA PaCa2	D14_1	0.01	1_D14_1_9	S	97	77	770	12.8333	64.7375	64.7375	61.6391	1.05027
1	MIA PaCa2	D14_1	0.01	1_D14_1_9	S	98	78	780	13	62.4652	62.4652	60.4758	1.0329
1	MIA PaCa2	D14_1	0.01	1_D14_1_9	S	99	79	790	13.1667	58.646	58.646	60.3963	0.97102
1	MIA PaCa2	D14_1	0.01	1_D14_1_9	S	100	80	800	13.3333	56.6388	56.6388	60.7884	0.931736
1	MIA PaCa2	D14_1	0.01	1_D14_1_9	S	101	81	810	13.5	54.607	54.607	60.3059	0.9055
1	MIA PaCa2	D14_1	0.01	1_D14_1_9	S	102	82	820	13.6667	55.5909	55.5909	60.7794	0.914633
1	MIA PaCa2	D14_1	0.01	1_D14_1_9	S	103	83	830	13.8333	56.5016	56.5016	60.5056	0.933824
1	MIA PaCa2	D14_1	0.01	1_D14_1_9	S	104	84	840	14	54.823	54.823	59.623	0.919494
1	MIA PaCa2	D14_1	0.01	1_D14_1_9	S	105	85	850	14.1667	56.3816	56.3816	59.3892	0.949358
1	MIA PaCa2	D14_1	0.01	1_D14_1_9	S	106	86	860	14.3333	54.9281	54.9281	59.9458	0.916297
1	MIA PaCa2	D14_1	0.01	1_D14_1_9	S	107	87	870	14.5	54.4885	54.4885	59.293	0.91897
1	MIA PaCa2	D14_1	0.01	1_D14_1_9	S	108	88	880	14.6667	54.0164	54.0164	59.7326	0.904303
1	MIA PaCa2	D14_1	0.01	1_D14_1_9	S	109	89	890	14.8333	54.0922	54.0922	59.2145	0.913496
1	MIA PaCa2	D14_1	0.01	1_D14_1_9	S	110	90	900	15	54.934	54.934	59.5265	0.922849
1	MIA PaCa2	D14_1	0.01	1_D14_1_9	S	111	91	910	15.1667	59.5328	59.5328	22.61	2.63303
1	MIA PaCa2	D14_1	0.01	1_D14_1_9	S	112	92	920	15.3333	24.0868	24.0868	22.6798	1.06204
1	MIA PaCa2	D14_1	0.01	1_D14_1_9	S	113	93	930	15.5	23.3346	23.3346	22.7253	1.02681
1	MIA PaCa2	D14_1	0.01	1_D14_1_9	S	114	94	940	15.6667	22.4903	22.4903	22.5639	0.99674
1	MIA PaCa2	D14_1	0.01	1_D14_1_9	S	115	95	950	15.8333	21.5114	21.5114	22.4399	0.958622
1	MIA PaCa2	D14_1	0.01	1_D14_1_9	S	116	96	960	16	22.689	22.689	22.771	0.996398
1	MIA PaCa2	D14_1	0.01	1_D14_1_9	S	117	97	970	16.1667	23.0662	23.0662	22.6665	1.01763
1	MIA PaCa2	D14_1	0.01	1_D14_1_9	S	118	98	980	16.3333	21.8504	21.8504	23.0617	0.947475
1	MIA PaCa2	D14_1	0.01	1_D14_1_9	S	119	99	990	16.5	24.4324	24.4324	22.7043	1.07612
1	MIA PaCa2	D14_1	0.01	1_D14_1_9	S	120	100	1000	16.6667	26.1399	26.1399	22.9546	1.13876
1	MIA PaCa2	D14_1	0.01	1_D14_1_9	S	121	101	1010	16.8333	25.1855	25.1855	23.1818	1.08643
1	MIA PaCa2	D14_1	0.01	1_D14_1_9	S	122	102	1020	17	24.9343	24.9343	22.9702	1.08551
1	MIA PaCa2	D14_1	0.01	1_D14_1_9	S	123	103	1030	17.1667	24.2713	24.2713	22.8295	1.06315
1	MIA PaCa2	D14_1	0.01	1_D14_1_9	S	124	104	1040	17.3333	22.2917	22.2917	22.8913	0.973808
1	MIA PaCa2	D14_1	0.01	1_D14_1_9	S	125	105	1050	17.5	22.2372	22.2372	22.9525	0.968837
1	MIA PaCa2	D14_1	0.01	1_D14_1_9	S	126	106	1060	17.6667	23.0901	23.0901	23.5781	0.979302
1	MIA PaCa2	D14_1	0.01	1_D14_1_9	S	127	107	1070	17.8333	23.0078	23.0078	23.1748	0.992793
1	MIA PaCa2	D14_1	0.01	1_D14_1_9	S	128	108	1080	18	23.6308	23.6308	22.9786	1.02838
1	MIA PaCa2	D14_1	0.01	1_D14_1_9	S	129	109	1090	18.1667	22.9357	22.9357	22.8524	1.00365
1	MIA PaCa2	D14_1	0.01	1_D14_1_9	S	130	110	1100	18.3333	23.0253	23.0253	22.9516	1.00321
1	MIA PaCa2	D14_1	0.01	1_D14_1_9	S	131	111	1110	18.5	23.3348	23.3348	22.9183	1.01817
1	MIA PaCa2	D14_1	0.01	1_D14_1_9	S	132	112	1120	18.6667	22.8435	22.8435	22.8756	0.998599
1	MIA PaCa2	D14_3	0.01	1_D14_3_12	G1	0	-20	-200	-3.33333	108.481	108.481	102.696	1.05633
1	MIA PaCa2	D14_3	0.01	1_D14_3_12	G1	1	-19	-190	-3.16667	102.247	102.247	98.9025	1.03382
1	MIA PaCa2	D14_3	0.01	1_D14_3_12	G1	2	-18	-180	-3	104.455	104.455	98.287	1.06276
1	MIA PaCa2	D14_3	0.01	1_D14_3_12	G1	3	-17	-170	-2.83333	100.45	100.45	95.5639	1.05113
1	MIA PaCa2	D14_3	0.01	1_D14_3_12	G1	4	-16	-160	-2.66667	98.5836	98.5836	94.8279	1.03961
1	MIA PaCa2	D14_3	0.01	1_D14_3_12	G1	5	-15	-150	-2.5	100.238	100.238	93.7282	1.06945
1	MIA PaCa2	D14_3	0.01	1_D14_3_12	G1	6	-14	-140	-2.33333	94.5583	94.5583	91.2043	1.03677
1	MIA PaCa2	D14_3	0.01	1_D14_3_12	G1	7	-13	-130	-2.16667	97.5556	97.5556	91.0398	1.07157
1	MIA PaCa2	D14_3	0.01	1_D14_3_12	G1	8	-12	-120	-2	92.4548	92.4548	89.9628	1.0277
1	MIA PaCa2	D14_3	0.01	1_D14_3_12	G1	9	-11	-110	-1.83333	89.7687	89.7687	88.8498	1.01034
1	MIA PaCa2	D14_3	0.01	1_D14_3_12	G1	10	-10	-100	-1.66667	92.4319	92.4319	88.0257	1.05006
1	MIA PaCa2	D14_3	0.01	1_D14_3_12	G1	11	-9	-90	-1.5	92.7469	92.7469	87.39	1.0613
1	MIA PaCa2	D14_3	0.01	1_D14_3_12	G1	12	-8	-80	-1.33333	90.4863	90.4863	86.2825	1.04872
1	MIA PaCa2	D14_3	0.01	1_D14_3_12	G1	13	-7	-70	-1.16667	90.8774	90.8774	84.872	1.07076
1	MIA PaCa2	D14_3	0.01	1_D14_3_12	G1	14	-6	-60	-1	91.538	91.538	85.6506	1.06874
1	MIA PaCa2	D14_3	0.01	1_D14_3_12	G1	15	-5	-50	-0.833333	92.3723	92.3723	84.1405	1.09783
1	MIA PaCa2	D14_3	0.01	1_D14_3_12	G1	16	-4	-40	-0.666667	90.5	90.5	82.5286	1.09659
1	MIA PaCa2	D14_3	0.01	1_D14_3_12	G1	17	-3	-30	-0.5	89.5985	89.5985	83.098	1.07823
1	MIA PaCa2	D14_3	0.01	1_D14_3_12	G1	18	-2	-20	-0.333333	87.032	87.032	82.7797	1.05137
1	MIA PaCa2	D14_3	0.01	1_D14_3_12	G1	19	-1	-10	-0.166667	88.6037	88.6037	82.0129	1.08036
1	MIA PaCa2	D14_3	0.01	1_D14_3_12	G1	20	0	0	0	81.7509	81.7509	81.1847	1.00697
1	MIA PaCa2	D14_3	0.01	1_D14_3_12	G1	21	1	10	0.166667	84.2586	84.2586	84.5183	0.996927
1	MIA PaCa2	D14_3	0.01	1_D14_3_12	G1	22	2	20	0.333333	85.3922	85.3922	82.9015	1.03004
1	MIA PaCa2	D14_3	0.01	1_D14_3_12	G1	23	3	30	0.5	88.2774	88.2774	82.0655	1.07569
1	MIA PaCa2	D14_3	0.01	1_D14_3_12	G1	24	4	40	0.666667	83.5949	83.5949	80.9707	1.03241
1	MIA PaCa2	D14_3	0.01	1_D14_3_12	G1	25	5	50	0.833333	84.9253	84.9253	80.691	1.05248
1	MIA PaCa2	D14_3	0.01	1_D14_3_12	G1	26	6	60	1	79.1268	79.1268	79.6097	0.993934
1	MIA PaCa2	D14_3	0.01	1_D14_3_12	G1	27	7	70	1.16667	81.8626	81.8626	79.1117	1.03477
1	MIA PaCa2	D14_3	0.01	1_D14_3_12	G1	28	8	80	1.33333	84.1377	84.1377	78.0016	1.07867
1	MIA PaCa2	D14_3	0.01	1_D14_3_12	G1	29	9	90	1.5	80.9363	80.9363	77.8528	1.03961
1	MIA PaCa2	D14_3	0.01	1_D14_3_12	G1	30	10	100	1.66667	82.083	82.083	77.6698	1.05682
1	MIA PaCa2	D14_3	0.01	1_D14_3_12	G1	31	11	110	1.83333	78.2428	78.2428	77.1169	1.0146
1	MIA PaCa2	D14_3	0.01	1_D14_3_12	G1	32	12	120	2	80.2289	80.2289	76.7701	1.04505
1	MIA PaCa2	D14_3	0.01	1_D14_3_12	G1	33	13	130	2.16667	78.3908	78.3908	75.9843	1.03167
1	MIA PaCa2	D14_3	0.01	1_D14_3_12	G1	34	14	140	2.33333	78.1082	78.1082	75.0842	1.04027
1	MIA PaCa2	D14_3	0.01	1_D14_3_12	G1	35	15	150	2.5	81.2784	81.2784	75.707	1.07359
1	MIA PaCa2	D14_3	0.01	1_D14_3_12	G1	36	16	160	2.66667	79.0925	79.0925	74.2775	1.06482
1	MIA PaCa2	D14_3	0.01	1_D14_3_12	G1	37	17	170	2.83333	75.629	75.629	73.2738	1.03214
1	MIA PaCa2	D14_3	0.01	1_D14_3_12	G1	38	18	180	3	83.8366	83.8366	73.1743	1.14571
1	MIA PaCa2	D14_3	0.01	1_D14_3_12	G1	39	19	190	3.16667	81.6052	81.6052	72.5019	1.12556
1	MIA PaCa2	D14_3	0.01	1_D14_3_12	G1	40	20	200	3.33333	76.5259	76.5259	71.7669	1.06631
1	MIA PaCa2	D14_3	0.01	1_D14_3_12	G1	41	21	210	3.5	79.8556	79.8556	72.0161	1.10886
1	MIA PaCa2	D14_3	0.01	1_D14_3_12	G1	42	22	220	3.66667	83.1567	83.1567	71.8185	1.15787
1	MIA PaCa2	D14_3	0.01	1_D14_3_12	G1	43	23	230	3.83333	86.0898	86.0898	71.1314	1.21029
1	MIA PaCa2	D14_3	0.01	1_D14_3_12	G1	44	24	240	4	91.9651	91.9651	70.5922	1.30277
1	MIA PaCa2	D14_3	0.01	1_D14_3_12	G1	45	25	250	4.16667	99.4783	99.4783	70.3088	1.41488
1	MIA PaCa2	D14_3	0.01	1_D14_3_15	G2	0	-20	-200	-3.33333	101.309	101.309	102.696	0.986497
1	MIA PaCa2	D14_3	0.01	1_D14_3_15	G2	1	-19	-190	-3.16667	100.652	100.652	98.9025	1.01769
1	MIA PaCa2	D14_3	0.01	1_D14_3_15	G2	2	-18	-180	-3	98.4636	98.4636	98.287	1.0018
1	MIA PaCa2	D14_3	0.01	1_D14_3_15	G2	3	-17	-170	-2.83333	97.7217	97.7217	95.5639	1.02258
1	MIA PaCa2	D14_3	0.01	1_D14_3_15	G2	4	-16	-160	-2.66667	95.9586	95.9586	94.8279	1.01192
1	MIA PaCa2	D14_3	0.01	1_D14_3_15	G2	5	-15	-150	-2.5	93.6446	93.6446	93.7282	0.999108
1	MIA PaCa2	D14_3	0.01	1_D14_3_15	G2	6	-14	-140	-2.33333	91.7794	91.7794	91.2043	1.00631
1	MIA PaCa2	D14_3	0.01	1_D14_3_15	G2	7	-13	-130	-2.16667	90.5852	90.5852	91.0398	0.995007
1	MIA PaCa2	D14_3	0.01	1_D14_3_15	G2	8	-12	-120	-2	89.7275	89.7275	89.9628	0.997384
1	MIA PaCa2	D14_3	0.01	1_D14_3_15	G2	9	-11	-110	-1.83333	89.4593	89.4593	88.8498	1.00686
1	MIA PaCa2	D14_3	0.01	1_D14_3_15	G2	10	-10	-100	-1.66667	87.7295	87.7295	88.0257	0.996635
1	MIA PaCa2	D14_3	0.01	1_D14_3_15	G2	11	-9	-90	-1.5	87.4558	87.4558	87.39	1.00075
1	MIA PaCa2	D14_3	0.01	1_D14_3_15	G2	12	-8	-80	-1.33333	85.1243	85.1243	86.2825	0.986576
1	MIA PaCa2	D14_3	0.01	1_D14_3_15	G2	13	-7	-70	-1.16667	83.5082	83.5082	84.872	0.983931
1	MIA PaCa2	D14_3	0.01	1_D14_3_15	G2	14	-6	-60	-1	83.0345	83.0345	85.6506	0.969456
1	MIA PaCa2	D14_3	0.01	1_D14_3_15	G2	15	-5	-50	-0.833333	82.739	82.739	84.1405	0.983344
1	MIA PaCa2	D14_3	0.01	1_D14_3_15	G2	16	-4	-40	-0.666667	81.5405	81.5405	82.5286	0.988028
1	MIA PaCa2	D14_3	0.01	1_D14_3_15	G2	17	-3	-30	-0.5	82.2683	82.2683	83.098	0.990016
1	MIA PaCa2	D14_3	0.01	1_D14_3_15	G2	18	-2	-20	-0.333333	80.5643	80.5643	82.7797	0.973237
1	MIA PaCa2	D14_3	0.01	1_D14_3_15	G2	19	-1	-10	-0.166667	81.5662	81.5662	82.0129	0.994553
1	MIA PaCa2	D14_3	0.01	1_D14_3_15	G2	20	0	0	0	80.6031	80.6031	81.1847	0.992836
1	MIA PaCa2	D14_3	0.01	1_D14_3_15	G2	21	1	10	0.166667	85.3333	85.3333	84.5183	1.00964
1	MIA PaCa2	D14_3	0.01	1_D14_3_15	G2	22	2	20	0.333333	85.3598	85.3598	82.9015	1.02965
1	MIA PaCa2	D14_3	0.01	1_D14_3_15	G2	23	3	30	0.5	86.7202	86.7202	82.0655	1.05672
1	MIA PaCa2	D14_3	0.01	1_D14_3_15	G2	24	4	40	0.666667	90.9847	90.9847	80.9707	1.12367
1	MIA PaCa2	D14_3	0.01	1_D14_3_15	G2	25	5	50	0.833333	95.1083	95.1083	80.691	1.17867
1	MIA PaCa2	D14_3	0.01	1_D14_3_15	G2	26	6	60	1	96.3115	96.3115	79.6097	1.2098
1	MIA PaCa2	D14_3	0.01	1_D14_3_15	G2	27	7	70	1.16667	94.6031	94.6031	79.1117	1.19582
1	MIA PaCa2	D14_3	0.01	1_D14_3_15	G2	28	8	80	1.33333	93.17	93.17	78.0016	1.19446
1	MIA PaCa2	D14_3	0.01	1_D14_3_15	G2	29	9	90	1.5	89.2108	89.2108	77.8528	1.14589
1	MIA PaCa2	D14_3	0.01	1_D14_3_15	G2	30	10	100	1.66667	87.75	87.75	77.6698	1.12978
1	MIA PaCa2	D14_3	0.01	1_D14_3_15	G2	31	11	110	1.83333	85.6228	85.6228	77.1169	1.1103
1	MIA PaCa2	D14_3	0.01	1_D14_3_15	G2	32	12	120	2	84.6109	84.6109	76.7701	1.10213
1	MIA PaCa2	D14_3	0.01	1_D14_3_15	G2	33	13	130	2.16667	84.5396	84.5396	75.9843	1.11259
1	MIA PaCa2	D14_3	0.01	1_D14_3_5	G2	1	-19	-190	-3.16667	94.1194	94.1194	98.9025	0.951638
1	MIA PaCa2	D14_3	0.01	1_D14_3_5	G2	2	-18	-180	-3	94.6972	94.6972	98.287	0.963476
1	MIA PaCa2	D14_3	0.01	1_D14_3_5	G2	3	-17	-170	-2.83333	90.3505	90.3505	95.5639	0.945446
1	MIA PaCa2	D14_3	0.01	1_D14_3_5	G2	4	-16	-160	-2.66667	89.1854	89.1854	94.8279	0.940497
1	MIA PaCa2	D14_3	0.01	1_D14_3_5	G2	5	-15	-150	-2.5	89.6856	89.6856	93.7282	0.956869
1	MIA PaCa2	D14_3	0.01	1_D14_3_5	G2	6	-14	-140	-2.33333	89.3162	89.3162	91.2043	0.979298
1	MIA PaCa2	D14_3	0.01	1_D14_3_5	G2	7	-13	-130	-2.16667	88.082	88.082	91.0398	0.967511
1	MIA PaCa2	D14_3	0.01	1_D14_3_5	G2	8	-12	-120	-2	85.3091	85.3091	89.9628	0.948271
1	MIA PaCa2	D14_3	0.01	1_D14_3_5	G2	9	-11	-110	-1.83333	85.5101	85.5101	88.8498	0.962412
1	MIA PaCa2	D14_3	0.01	1_D14_3_5	G2	10	-10	-100	-1.66667	87.0632	87.0632	88.0257	0.989066
1	MIA PaCa2	D14_3	0.01	1_D14_3_5	G2	11	-9	-90	-1.5	86.5071	86.5071	87.39	0.989897
1	MIA PaCa2	D14_3	0.01	1_D14_3_5	G2	12	-8	-80	-1.33333	82.7275	82.7275	86.2825	0.958798
1	MIA PaCa2	D14_3	0.01	1_D14_3_5	G2	13	-7	-70	-1.16667	82.1734	82.1734	84.872	0.968204
1	MIA PaCa2	D14_3	0.01	1_D14_3_5	G2	14	-6	-60	-1	81.3085	81.3085	85.6506	0.949305
1	MIA PaCa2	D14_3	0.01	1_D14_3_5	G2	15	-5	-50	-0.833333	83.7775	83.7775	84.1405	0.995686
1	MIA PaCa2	D14_3	0.01	1_D14_3_5	G2	16	-4	-40	-0.666667	81.9596	81.9596	82.5286	0.993106
1	MIA PaCa2	D14_3	0.01	1_D14_3_5	G2	17	-3	-30	-0.5	80.6306	80.6306	83.098	0.970307
1	MIA PaCa2	D14_3	0.01	1_D14_3_5	G2	18	-2	-20	-0.333333	78.6925	78.6925	82.7797	0.950625
1	MIA PaCa2	D14_3	0.01	1_D14_3_5	G2	19	-1	-10	-0.166667	76.965	76.965	82.0129	0.93845
1	MIA PaCa2	D14_3	0.01	1_D14_3_5	G2	20	0	0	0	77.5925	77.5925	81.1847	0.955752
1	MIA PaCa2	D14_3	0.01	1_D14_3_5	G2	21	1	10	0.166667	79.8603	79.8603	84.5183	0.944888
1	MIA PaCa2	D14_3	0.01	1_D14_3_5	G2	22	2	20	0.333333	79.664	79.664	82.9015	0.960947
1	MIA PaCa2	D14_3	0.01	1_D14_3_5	G2	23	3	30	0.5	81.4479	81.4479	82.0655	0.992474
1	MIA PaCa2	D14_3	0.01	1_D14_3_5	G2	24	4	40	0.666667	81.7176	81.7176	80.9707	1.00922
1	MIA PaCa2	D14_3	0.01	1_D14_3_5	G2	25	5	50	0.833333	83.2492	83.2492	80.691	1.0317
1	MIA PaCa2	D14_3	0.01	1_D14_3_5	G2	26	6	60	1	82.2939	82.2939	79.6097	1.03372
1	MIA PaCa2	D14_3	0.01	1_D14_3_5	G2	27	7	70	1.16667	82.0254	82.0254	79.1117	1.03683
1	MIA PaCa2	D14_3	0.01	1_D14_3_5	G2	28	8	80	1.33333	84.5262	84.5262	78.0016	1.08365
1	MIA PaCa2	D14_3	0.01	1_D14_3_5	G2	29	9	90	1.5	83.4372	83.4372	77.8528	1.07173
1	MIA PaCa2	D14_3	0.01	1_D14_3_5	G2	30	10	100	1.66667	83.9431	83.9431	77.6698	1.08077
1	MIA PaCa2	D14_3	0.01	1_D14_3_5	G2	31	11	110	1.83333	81.8228	81.8228	77.1169	1.06102
1	MIA PaCa2	D14_3	0.01	1_D14_3_5	G2	32	12	120	2	81.4278	81.4278	76.7701	1.06067
1	MIA PaCa2	D14_3	0.01	1_D14_3_5	G2	33	13	130	2.16667	80.2577	80.2577	75.9843	1.05624
1	MIA PaCa2	D14_3	0.01	1_D14_3_5	G2	34	14	140	2.33333	80.69	80.69	75.0842	1.07466
1	MIA PaCa2	D14_3	0.01	1_D14_3_5	G2	35	15	150	2.5	79.0712	79.0712	75.707	1.04444
1	MIA PaCa2	D14_3	0.01	1_D14_3_5	G2	36	16	160	2.66667	77.6718	77.6718	74.2775	1.0457
1	MIA PaCa2	D14_3	0.01	1_D14_3_5	G2	38	18	180	3	81.7712	81.7712	73.1743	1.11749
1	MIA PaCa2	D14_3	0.01	1_D14_3_5	G2	39	19	190	3.16667	82.1064	82.1064	72.5019	1.13247
1	MIA PaCa2	D14_3	0.01	1_D14_3_5	G2	40	20	200	3.33333	78.3721	78.3721	71.7669	1.09204
1	MIA PaCa2	D14_3	0.01	1_D14_3_5	G2	41	21	210	3.5	77.1421	77.1421	72.0161	1.07118
1	MIA PaCa2	D14_3	0.01	1_D14_3_5	G2	42	22	220	3.66667	79.389	79.389	71.8185	1.10541
1	MIA PaCa2	D14_3	0.01	1_D14_3_5	G2	43	23	230	3.83333	78.6427	78.6427	71.1314	1.1056
1	MIA PaCa2	D14_3	0.01	1_D14_3_5	G2	44	24	240	4	81.1895	81.1895	70.5922	1.15012
1	MIA PaCa2	D14_3	0.01	1_D14_3_5	G2	45	25	250	4.16667	83.0333	83.0333	70.3088	1.18098
1	MIA PaCa2	D14_3	0.01	1_D14_3_5	G2	46	26	260	4.33333	82.9974	82.9974	70.5953	1.17568
1	MIA PaCa2	D14_3	0.01	1_D14_3_5	G2	48	28	280	4.66667	80.4178	80.4178	69.4746	1.15751
1	MIA PaCa2	D14_3	0.01	1_D14_3_5	G2	49	29	290	4.83333	77.7651	77.7651	68.6304	1.1331
1	MIA PaCa2	D14_3	0.01	1_D14_3_5	G2	50	30	300	5	77.3735	77.3735	68.8548	1.12372
1	MIA PaCa2	D14_3	0.01	1_D14_3_5	G2	51	31	310	5.16667	78.0482	78.0482	68.1679	1.14494
1	MIA PaCa2	D14_3	0.01	1_D14_3_5	G2	52	32	320	5.33333	76.1692	76.1692	67.3507	1.13093
1	MIA PaCa2	D14_3	0.01	1_D14_3_5	G2	53	33	330	5.5	76.5433	76.5433	67.9219	1.12693
1	MIA PaCa2	D14_3	0.01	1_D14_3_5	G2	54	34	340	5.66667	76.6165	76.6165	68.0349	1.12613
1	MIA PaCa2	D14_3	0.01	1_D14_3_5	G2	55	35	350	5.83333	73.938	73.938	68.887	1.07332
1	MIA PaCa2	D14_3	0.01	1_D14_3_5	G2	56	36	360	6	73.5486	73.5486	68.1633	1.07901
1	MIA PaCa2	D14_3	0.01	1_D14_3_5	G2	57	37	370	6.16667	70.4221	70.4221	67.2471	1.04721
1	MIA PaCa2	D14_3	0.01	1_D14_3_5	G2	58	38	380	6.33333	71.0912	71.0912	67.1163	1.05922
1	MIA PaCa2	D14_3	0.01	1_D14_3_5	G2	59	39	390	6.5	73.0887	73.0887	66.9979	1.09091
1	MIA PaCa2	D14_3	0.01	1_D14_3_5	G2	60	40	400	6.66667	72.8983	72.8983	66.8466	1.09053
1	MIA PaCa2	D14_3	0.01	1_D14_3_5	G2	61	41	410	6.83333	69.8212	69.8212	66.872	1.0441
1	MIA PaCa2	D14_3	0.01	1_D14_3_5	G2	62	42	420	7	76.8425	76.8425	67.4151	1.13984
1	MIA PaCa2	D14_3	0.01	1_D14_3_5	G2	63	43	430	7.16667	76.8951	76.8951	66.593	1.1547
1	MIA PaCa2	D14_3	0.01	1_D14_3_5	G2	64	44	440	7.33333	75.1294	75.1294	64.9413	1.15688
1	MIA PaCa2	D14_3	0.01	1_D14_3_5	G2	65	45	450	7.5	78.6878	78.6878	65.8821	1.19437
1	MIA PaCa2	D14_3	0.01	1_D14_3_5	G2	66	46	460	7.66667	81.4599	81.4599	65.7717	1.23853
1	MIA PaCa2	D14_3	0.01	1_D14_3_5	G2	67	47	470	7.83333	81.1008	81.1008	65.9693	1.22937
1	MIA PaCa2	D14_3	0.01	1_D14_3_5	G2	68	48	480	8	78.6741	78.6741	65.2461	1.2058
1	MIA PaCa2	D14_3	0.01	1_D14_3_5	G2	69	49	490	8.16667	78.3882	78.3882	64.9541	1.20682
1	MIA PaCa2	D14_3	0.01	1_D14_3_5	G2	70	50	500	8.33333	83.7874	83.7874	64.7238	1.29454
1	MIA PaCa2	D14_3	0.01	1_D14_3_5	G2	71	51	510	8.5	83.1673	83.1673	64.8745	1.28197
1	MIA PaCa2	D14_3	0.01	1_D14_3_5	G2	72	52	520	8.66667	83.2996	83.2996	65.0075	1.28138
1	MIA PaCa2	D14_3	0.01	1_D14_3_5	G2	73	53	530	8.83333	82.145	82.145	64.3036	1.27746
1	MIA PaCa2	D14_3	0.01	1_D14_3_5	G2	74	54	540	9	83.8932	83.8932	64.0165	1.31049
1	MIA PaCa2	D14_3	0.01	1_D14_3_5	G2	75	55	550	9.16667	83.1261	83.1261	64.712	1.28456
1	MIA PaCa2	D14_3	0.01	1_D14_3_5	G2	79	59	590	9.83333	75.2356	75.2356	63.4249	1.18622
1	MIA PaCa2	D14_3	0.01	1_D14_3_5	G2	80	60	600	10	79.5657	79.5657	63.1512	1.25992
1	MIA PaCa2	D14_3	0.01	1_D14_3_5	G2	81	61	610	10.1667	80.9865	80.9865	63.2666	1.28008
1	MIA PaCa2	D14_3	0.01	1_D14_3_5	G2	82	62	620	10.3333	78.3315	78.3315	62.8471	1.24638
1	MIA PaCa2	D14_3	0.01	1_D14_3_5	G2	83	63	630	10.5	76.5467	76.5467	62.9485	1.21602
1	MIA PaCa2	D14_3	0.01	1_D14_3_5	G2	84	64	640	10.6667	76.0142	76.0142	63.5908	1.19537
1	MIA PaCa2	D14_3	0.01	1_D14_3_5	G2	85	65	650	10.8333	75.7922	75.7922	63.0209	1.20265
1	MIA PaCa2	D14_3	0.01	1_D14_3_5	G2	86	66	660	11	75.2582	75.2582	63.2933	1.18904
1	MIA PaCa2	D14_3	0.01	1_D14_3_5	G2	87	67	670	11.1667	73.4655	73.4655	61.9681	1.18554
1	MIA PaCa2	D14_3	0.01	1_D14_3_5	G2	88	68	680	11.3333	74.0051	74.0051	61.0898	1.21142
1	MIA PaCa2	D14_3	0.01	1_D14_3_5	G2	89	69	690	11.5	73.7921	73.7921	61.5941	1.19804
1	MIA PaCa2	D14_3	0.01	1_D14_3_5	G2	90	70	700	11.6667	76.3921	76.3921	62.8735	1.21501
1	MIA PaCa2	D14_3	0.01	1_D14_3_5	G2	91	71	710	11.8333	73.4595	73.4595	61.5615	1.19327
1	MIA PaCa2	D14_3	0.01	1_D14_3_5	G2	92	72	720	12	72.0152	72.0152	60.7859	1.18473
1	MIA PaCa2	D14_3	0.01	1_D14_3_5	G2	93	73	730	12.1667	74.0667	74.0667	60.8609	1.21698
1	MIA PaCa2	D14_3	0.01	1_D14_3_5	G2	94	74	740	12.3333	71.5351	71.5351	60.9904	1.17289
1	MIA PaCa2	D14_3	0.01	1_D14_3_5	G2	95	75	750	12.5	73.4801	73.4801	61.556	1.19371
1	MIA PaCa2	D14_3	0.01	1_D14_3_5	G2	96	76	760	12.6667	73.0914	73.0914	61.3403	1.19157
1	MIA PaCa2	D14_3	0.01	1_D14_3_5	G2	97	77	770	12.8333	67.6286	67.6286	61.6391	1.09717
1	MIA PaCa2	D14_3	0.01	1_D14_3_5	G2	98	78	780	13	65.5708	65.5708	60.4758	1.08425
1	MIA PaCa2	D14_3	0.01	1_D14_3_5	G2	99	79	790	13.1667	65.4675	65.4675	60.3963	1.08397
1	MIA PaCa2	D14_3	0.01	1_D14_3_5	G2	100	80	800	13.3333	65.3361	65.3361	60.7884	1.07481
1	MIA PaCa2	D14_3	0.01	1_D14_3_5	G2	101	81	810	13.5	63.4463	63.4463	60.3059	1.05207
1	MIA PaCa2	D14_3	0.01	1_D14_3_5	G2	102	82	820	13.6667	66.6207	66.6207	60.7794	1.09611
1	MIA PaCa2	D14_3	0.01	1_D14_3_5	G2	103	83	830	13.8333	64.6799	64.6799	60.5056	1.06899
1	MIA PaCa2	D14_3	0.01	1_D14_3_5	G2	104	84	840	14	67.5344	67.5344	59.623	1.13269
1	MIA PaCa2	D14_3	0.01	1_D14_3_5	G2	105	85	850	14.1667	68.509	68.509	59.3892	1.15356
1	MIA PaCa2	D14_3	0.01	1_D14_3_5	G2	106	86	860	14.3333	62.9042	62.9042	59.9458	1.04935
1	MIA PaCa2	D14_3	0.01	1_D14_3_5	G2	107	87	870	14.5	64.979	64.979	59.293	1.0959
1	MIA PaCa2	D14_3	0.01	1_D14_3_5	G2	108	88	880	14.6667	64.3028	64.3028	59.7326	1.07651
1	MIA PaCa2	D14_3	0.01	1_D14_3_5	G2	109	89	890	14.8333	65.4811	65.4811	59.2145	1.10583
1	MIA PaCa2	D14_3	0.01	1_D14_3_5	G2	110	90	900	15	62.3333	62.3333	59.5265	1.04715
1	MIA PaCa2	D14_3	0.01	1_D14_3_5	G2	111	91	910	15.1667	60.2897	60.2897	22.61	2.6665
1	MIA PaCa2	D14_3	0.01	1_D14_3_5	G2	112	92	920	15.3333	23.732	23.732	22.6798	1.04639
1	MIA PaCa2	D14_3	0.01	1_D14_3_5	G2	113	93	930	15.5	25.6504	25.6504	22.7253	1.12872
1	MIA PaCa2	D14_3	0.01	1_D14_3_5	G2	114	94	940	15.6667	24.4912	24.4912	22.5639	1.08542
1	MIA PaCa2	D14_3	0.01	1_D14_3_5	G2	115	95	950	15.8333	25.3771	25.3771	22.4399	1.13089
1	MIA PaCa2	D14_3	0.01	1_D14_3_5	G2	116	96	960	16	24.8213	24.8213	22.771	1.09004
1	MIA PaCa2	D14_3	0.01	1_D14_3_5	G2	117	97	970	16.1667	24.7489	24.7489	22.6665	1.09187
1	MIA PaCa2	D14_3	0.01	1_D14_3_5	G2	118	98	980	16.3333	24.7657	24.7657	23.0617	1.07389
1	MIA PaCa2	D14_3	0.01	1_D14_3_5	G2	119	99	990	16.5	24.2282	24.2282	22.7043	1.06712
1	MIA PaCa2	D14_3	0.01	1_D14_3_5	G2	120	100	1000	16.6667	24.0942	24.0942	22.9546	1.04964
1	MIA PaCa2	D14_3	0.01	1_D14_3_70	S	11	-9	-90	-1.5	121.625	121.625	87.39	1.39174
1	MIA PaCa2	D14_3	0.01	1_D14_3_70	S	12	-8	-80	-1.33333	108.595	108.595	86.2825	1.2586
1	MIA PaCa2	D14_3	0.01	1_D14_3_70	S	13	-7	-70	-1.16667	109.868	109.868	84.872	1.29452
1	MIA PaCa2	D14_3	0.01	1_D14_3_70	S	14	-6	-60	-1	106.897	106.897	85.6506	1.24806
1	MIA PaCa2	D14_3	0.01	1_D14_3_70	S	15	-5	-50	-0.833333	102.995	102.995	84.1405	1.22409
1	MIA PaCa2	D14_3	0.01	1_D14_3_70	S	16	-4	-40	-0.666667	107.257	107.257	82.5286	1.29963
1	MIA PaCa2	D14_3	0.01	1_D14_3_70	S	17	-3	-30	-0.5	105.961	105.961	83.098	1.27513
1	MIA PaCa2	D14_3	0.01	1_D14_3_70	S	18	-2	-20	-0.333333	105.113	105.113	82.7797	1.26979
1	MIA PaCa2	D14_3	0.01	1_D14_3_70	S	19	-1	-10	-0.166667	99.0286	99.0286	82.0129	1.20748
1	MIA PaCa2	D14_3	0.01	1_D14_3_70	S	20	0	0	0	101.352	101.352	81.1847	1.24842
1	MIA PaCa2	D14_3	0.01	1_D14_3_70	S	21	1	10	0.166667	101.547	101.547	84.5183	1.20148
1	MIA PaCa2	D14_3	0.01	1_D14_3_70	S	22	2	20	0.333333	106.273	106.273	82.9015	1.28192
1	MIA PaCa2	D14_3	0.01	1_D14_3_70	S	23	3	30	0.5	111.99	111.99	82.0655	1.36465
1	MIA PaCa2	D14_3	0.01	1_D14_3_70	S	24	4	40	0.666667	115.144	115.144	80.9707	1.42204
1	MIA PaCa2	D14_3	0.01	1_D14_3_70	S	25	5	50	0.833333	119.494	119.494	80.691	1.48088
1	MIA PaCa2	D14_3	0.01	1_D14_3_70	S	26	6	60	1	118.023	118.023	79.6097	1.48252
1	MIA PaCa2	D14_3	0.01	1_D14_3_70	S	27	7	70	1.16667	118.593	118.593	79.1117	1.49905
1	MIA PaCa2	D14_3	0.01	1_D14_3_70	S	28	8	80	1.33333	117.698	117.698	78.0016	1.50892
1	MIA PaCa2	D14_3	0.01	1_D14_3_70	S	29	9	90	1.5	117.354	117.354	77.8528	1.50738
1	MIA PaCa2	D14_3	0.01	1_D14_3_70	S	30	10	100	1.66667	114.534	114.534	77.6698	1.47463
1	MIA PaCa2	D14_3	0.01	1_D14_3_70	S	31	11	110	1.83333	114.584	114.584	77.1169	1.48585
1	MIA PaCa2	D14_3	0.01	1_D14_3_70	S	32	12	120	2	116.046	116.046	76.7701	1.5116
1	MIA PaCa2	D14_3	0.01	1_D14_3_70	S	33	13	130	2.16667	116.245	116.245	75.9843	1.52986
1	MIA PaCa2	D14_3	0.01	1_D14_3_70	S	34	14	140	2.33333	110.997	110.997	75.0842	1.4783
1	MIA PaCa2	D14_3	0.01	1_D14_3_70	S	35	15	150	2.5	110.31	110.31	75.707	1.45706
1	MIA PaCa2	D14_3	0.01	1_D14_3_70	S	36	16	160	2.66667	108.073	108.073	74.2775	1.45498
1	MIA PaCa2	D14_3	0.01	1_D14_3_70	S	37	17	170	2.83333	104.284	104.284	73.2738	1.42321
1	MIA PaCa2	D14_3	0.01	1_D14_3_70	S	38	18	180	3	104.396	104.396	73.1743	1.42668
1	MIA PaCa2	D14_3	0.01	1_D14_3_70	S	39	19	190	3.16667	108.473	108.473	72.5019	1.49614
1	MIA PaCa2	D14_3	0.01	1_D14_3_70	S	40	20	200	3.33333	106.605	106.605	71.7669	1.48544
1	MIA PaCa2	D14_3	0.01	1_D14_3_70	S	41	21	210	3.5	107.229	107.229	72.0161	1.48896
1	MIA PaCa2	D14_3	0.01	1_D14_3_70	S	42	22	220	3.66667	108.01	108.01	71.8185	1.50392
1	MIA PaCa2	D14_3	0.01	1_D14_3_70	S	43	23	230	3.83333	103.574	103.574	71.1314	1.4561
1	MIA PaCa2	D14_3	0.01	1_D14_3_70	S	44	24	240	4	102.799	102.799	70.5922	1.45623
1	MIA PaCa2	D14_3	0.01	1_D14_3_70	S	45	25	250	4.16667	99.1625	99.1625	70.3088	1.41039
1	MIA PaCa2	D14_3	0.01	1_D14_3_70	S	46	26	260	4.33333	97.6024	97.6024	70.5953	1.38256
1	MIA PaCa2	D14_3	0.01	1_D14_3_70	S	47	27	270	4.5	99.123	99.123	70.0862	1.4143
1	MIA PaCa2	D14_3	0.01	1_D14_3_70	S	48	28	280	4.66667	95.6057	95.6057	69.4746	1.37612
1	MIA PaCa2	D14_3	0.01	1_D14_3_70	S	49	29	290	4.83333	91.3754	91.3754	68.6304	1.33141
1	MIA PaCa2	D14_3	0.01	1_D14_3_70	S	50	30	300	5	92.1141	92.1141	68.8548	1.3378
1	MIA PaCa2	D14_3	0.01	1_D14_3_70	S	51	31	310	5.16667	92.9144	92.9144	68.1679	1.36302
1	MIA PaCa2	D14_3	0.01	1_D14_3_70	S	52	32	320	5.33333	97.936	97.936	67.3507	1.45412
1	MIA PaCa2	D14_3	0.01	1_D14_3_70	S	53	33	330	5.5	97.5458	97.5458	67.9219	1.43615
1	MIA PaCa2	D14_3	0.01	1_D14_3_70	S	54	34	340	5.66667	97.5132	97.5132	68.0349	1.43328
1	MIA PaCa2	D14_3	0.01	1_D14_3_70	S	55	35	350	5.83333	94.7562	94.7562	68.887	1.37553
1	MIA PaCa2	D14_3	0.01	1_D14_3_70	S	56	36	360	6	91.7227	91.7227	68.1633	1.34563
1	MIA PaCa2	D14_3	0.01	1_D14_3_70	S	57	37	370	6.16667	91.0388	91.0388	67.2471	1.35379
1	MIA PaCa2	D14_3	0.01	1_D14_3_70	S	58	38	380	6.33333	88.2582	88.2582	67.1163	1.315
1	MIA PaCa2	D14_3	0.01	1_D14_3_70	S	59	39	390	6.5	90.8683	90.8683	66.9979	1.35629
1	MIA PaCa2	D14_3	0.01	1_D14_3_70	S	60	40	400	6.66667	88.727	88.727	66.8466	1.32732
1	MIA PaCa2	D14_3	0.01	1_D14_3_70	S	61	41	410	6.83333	88.2338	88.2338	66.872	1.31944
1	MIA PaCa2	D14_3	0.01	1_D14_3_70	S	62	42	420	7	89.3574	89.3574	67.4151	1.32548
1	MIA PaCa2	D14_3	0.01	1_D14_3_70	S	63	43	430	7.16667	90.4333	90.4333	66.593	1.358
1	MIA PaCa2	D14_3	0.01	1_D14_3_70	S	64	44	440	7.33333	85.2905	85.2905	64.9413	1.31335
1	MIA PaCa2	D14_3	0.01	1_D14_3_70	S	65	45	450	7.5	86.0702	86.0702	65.8821	1.30643
1	MIA PaCa2	D14_3	0.01	1_D14_3_70	S	66	46	460	7.66667	84.3709	84.3709	65.7717	1.28278
1	MIA PaCa2	D14_3	0.01	1_D14_3_70	S	67	47	470	7.83333	83.617	83.617	65.9693	1.26751
1	MIA PaCa2	D14_3	0.01	1_D14_3_70	S	68	48	480	8	83.6759	83.6759	65.2461	1.28247
1	MIA PaCa2	D14_3	0.01	1_D14_3_70	S	69	49	490	8.16667	85.3655	85.3655	64.9541	1.31424
1	MIA PaCa2	D14_3	0.01	1_D14_3_70	S	70	50	500	8.33333	87.8973	87.8973	64.7238	1.35804
1	MIA PaCa2	D14_3	0.01	1_D14_3_70	S	71	51	510	8.5	88.2819	88.2819	64.8745	1.36081
1	MIA PaCa2	D14_3	0.01	1_D14_3_70	S	72	52	520	8.66667	92.313	92.313	65.0075	1.42004
1	MIA PaCa2	D14_3	0.01	1_D14_3_70	S	73	53	530	8.83333	87.8521	87.8521	64.3036	1.36621
1	MIA PaCa2	D14_3	0.01	1_D14_3_70	S	74	54	540	9	84.3295	84.3295	64.0165	1.31731
1	MIA PaCa2	D14_3	0.01	1_D14_3_70	S	75	55	550	9.16667	86.0962	86.0962	64.712	1.33045
1	MIA PaCa2	D14_3	0.01	1_D14_3_70	S	76	56	560	9.33333	83.9072	83.9072	64.0422	1.31019
1	MIA PaCa2	D14_3	0.01	1_D14_3_70	S	77	57	570	9.5	85.7075	85.7075	63.8764	1.34177
1	MIA PaCa2	D14_3	0.01	1_D14_3_70	S	78	58	580	9.66667	82.6875	82.6875	63.7423	1.29722
1	MIA PaCa2	D14_3	0.01	1_D14_3_70	S	79	59	590	9.83333	82.1069	82.1069	63.4249	1.29455
1	MIA PaCa2	D14_3	0.01	1_D14_3_70	S	80	60	600	10	80.7367	80.7367	63.1512	1.27847
1	MIA PaCa2	D14_3	0.01	1_D14_3_70	S	81	61	610	10.1667	80.0436	80.0436	63.2666	1.26518
1	MIA PaCa2	D14_3	0.01	1_D14_3_70	S	82	62	620	10.3333	85.3372	85.3372	62.8471	1.35785
1	MIA PaCa2	D14_3	0.01	1_D14_3_70	S	83	63	630	10.5	89.5952	89.5952	62.9485	1.42331
1	MIA PaCa2	D14_3	0.01	1_D14_3_70	S	84	64	640	10.6667	84.7608	84.7608	63.5908	1.33291
1	MIA PaCa2	D14_3	0.01	1_D14_3_72	S	9	-11	-110	-1.83333	106.151	106.151	88.8498	1.19473
1	MIA PaCa2	D14_3	0.01	1_D14_3_72	S	10	-10	-100	-1.66667	103.095	103.095	88.0257	1.17119
1	MIA PaCa2	D14_3	0.01	1_D14_3_72	S	11	-9	-90	-1.5	101.462	101.462	87.39	1.16103
1	MIA PaCa2	D14_3	0.01	1_D14_3_72	S	12	-8	-80	-1.33333	97.2662	97.2662	86.2825	1.1273
1	MIA PaCa2	D14_3	0.01	1_D14_3_72	S	13	-7	-70	-1.16667	93.6559	93.6559	84.872	1.1035
1	MIA PaCa2	D14_3	0.01	1_D14_3_72	S	14	-6	-60	-1	95.4523	95.4523	85.6506	1.11444
1	MIA PaCa2	D14_3	0.01	1_D14_3_72	S	15	-5	-50	-0.833333	96.7742	96.7742	84.1405	1.15015
1	MIA PaCa2	D14_3	0.01	1_D14_3_72	S	16	-4	-40	-0.666667	94.698	94.698	82.5286	1.14746
1	MIA PaCa2	D14_3	0.01	1_D14_3_72	S	17	-3	-30	-0.5	93.7681	93.7681	83.098	1.1284
1	MIA PaCa2	D14_3	0.01	1_D14_3_72	S	18	-2	-20	-0.333333	93.9778	93.9778	82.7797	1.13528
1	MIA PaCa2	D14_3	0.01	1_D14_3_72	S	19	-1	-10	-0.166667	94.4411	94.4411	82.0129	1.15154
1	MIA PaCa2	D14_3	0.01	1_D14_3_72	S	20	0	0	0	94.5508	94.5508	81.1847	1.16464
1	MIA PaCa2	D14_3	0.01	1_D14_3_72	S	21	1	10	0.166667	95.9775	95.9775	84.5183	1.13558
1	MIA PaCa2	D14_3	0.01	1_D14_3_72	S	22	2	20	0.333333	102.472	102.472	82.9015	1.23607
1	MIA PaCa2	D14_3	0.01	1_D14_3_72	S	23	3	30	0.5	103.147	103.147	82.0655	1.25689
1	MIA PaCa2	D14_3	0.01	1_D14_3_72	S	24	4	40	0.666667	107.614	107.614	80.9707	1.32905
1	MIA PaCa2	D14_3	0.01	1_D14_3_72	S	25	5	50	0.833333	110.895	110.895	80.691	1.37432
1	MIA PaCa2	D14_3	0.01	1_D14_3_72	S	26	6	60	1	107.726	107.726	79.6097	1.35317
1	MIA PaCa2	D14_3	0.01	1_D14_3_72	S	27	7	70	1.16667	102.198	102.198	79.1117	1.29183
1	MIA PaCa2	D14_3	0.01	1_D14_3_72	S	28	8	80	1.33333	102.723	102.723	78.0016	1.31693
1	MIA PaCa2	D14_3	0.01	1_D14_3_72	S	29	9	90	1.5	104.295	104.295	77.8528	1.33965
1	MIA PaCa2	D14_3	0.01	1_D14_3_72	S	30	10	100	1.66667	106.336	106.336	77.6698	1.36907
1	MIA PaCa2	D14_3	0.01	1_D14_3_72	S	31	11	110	1.83333	101.694	101.694	77.1169	1.3187
1	MIA PaCa2	D14_3	0.01	1_D14_3_72	S	32	12	120	2	103.075	103.075	76.7701	1.34264
1	MIA PaCa2	D14_3	0.01	1_D14_3_72	S	33	13	130	2.16667	103.294	103.294	75.9843	1.35942
1	MIA PaCa2	D14_3	0.01	1_D14_3_72	S	34	14	140	2.33333	106.33	106.33	75.0842	1.41614
1	MIA PaCa2	D14_3	0.01	1_D14_3_72	S	35	15	150	2.5	103.408	103.408	75.707	1.3659
1	MIA PaCa2	D14_3	0.01	1_D14_3_72	S	36	16	160	2.66667	103.922	103.922	74.2775	1.39911
1	MIA PaCa2	D14_3	0.01	1_D14_3_72	S	37	17	170	2.83333	102.693	102.693	73.2738	1.40149
1	MIA PaCa2	D14_3	0.01	1_D14_3_72	S	38	18	180	3	102.207	102.207	73.1743	1.39676
1	MIA PaCa2	D14_3	0.01	1_D14_3_72	S	39	19	190	3.16667	100.599	100.599	72.5019	1.38753
1	MIA PaCa2	D14_3	0.01	1_D14_3_72	S	40	20	200	3.33333	92.6783	92.6783	71.7669	1.29138
1	MIA PaCa2	D14_3	0.01	1_D14_3_72	S	41	21	210	3.5	94.1632	94.1632	72.0161	1.30753
1	MIA PaCa2	D14_3	0.01	1_D14_3_72	S	42	22	220	3.66667	93.6726	93.6726	71.8185	1.3043
1	MIA PaCa2	D14_3	0.01	1_D14_3_72	S	43	23	230	3.83333	96.1837	96.1837	71.1314	1.3522
1	MIA PaCa2	D14_3	0.01	1_D14_3_72	S	44	24	240	4	97.5994	97.5994	70.5922	1.38258
1	MIA PaCa2	D14_3	0.01	1_D14_3_72	S	45	25	250	4.16667	94.8715	94.8715	70.3088	1.34935
1	MIA PaCa2	D14_3	0.01	1_D14_3_72	S	46	26	260	4.33333	94.169	94.169	70.5953	1.33393
1	MIA PaCa2	D14_3	0.01	1_D14_3_72	S	47	27	270	4.5	96.7396	96.7396	70.0862	1.3803
1	MIA PaCa2	D14_3	0.01	1_D14_3_72	S	48	28	280	4.66667	96.9176	96.9176	69.4746	1.39501
1	MIA PaCa2	D14_3	0.01	1_D14_3_72	S	49	29	290	4.83333	93.8054	93.8054	68.6304	1.36682
1	MIA PaCa2	D14_3	0.01	1_D14_3_72	S	50	30	300	5	93.1114	93.1114	68.8548	1.35229
1	MIA PaCa2	D14_3	0.01	1_D14_3_72	S	51	31	310	5.16667	92.9158	92.9158	68.1679	1.36304
1	MIA PaCa2	D14_3	0.01	1_D14_3_72	S	52	32	320	5.33333	88.4698	88.4698	67.3507	1.31357
1	MIA PaCa2	D14_3	0.01	1_D14_3_72	S	53	33	330	5.5	89.9972	89.9972	67.9219	1.32501
1	MIA PaCa2	D14_3	0.01	1_D14_3_72	S	54	34	340	5.66667	86.7778	86.7778	68.0349	1.27549
1	MIA PaCa2	D14_3	0.01	1_D14_3_72	S	55	35	350	5.83333	86.7265	86.7265	68.887	1.25897
1	MIA PaCa2	D14_3	0.01	1_D14_3_72	S	56	36	360	6	86.241	86.241	68.1633	1.26521
1	MIA PaCa2	D14_3	0.01	1_D14_3_72	S	57	37	370	6.16667	85.6206	85.6206	67.2471	1.27322
1	MIA PaCa2	D14_3	0.01	1_D14_3_72	S	58	38	380	6.33333	86.419	86.419	67.1163	1.2876
1	MIA PaCa2	D14_3	0.01	1_D14_3_72	S	59	39	390	6.5	86.5481	86.5481	66.9979	1.2918
1	MIA PaCa2	D14_3	0.01	1_D14_3_72	S	60	40	400	6.66667	91.1717	91.1717	66.8466	1.36389
1	MIA PaCa2	D14_3	0.01	1_D14_3_72	S	61	41	410	6.83333	90.3269	90.3269	66.872	1.35074
1	MIA PaCa2	D14_3	0.01	1_D14_3_72	S	62	42	420	7	88.3389	88.3389	67.4151	1.31037
1	MIA PaCa2	D14_3	0.01	1_D14_3_72	S	63	43	430	7.16667	85.1602	85.1602	66.593	1.27882
1	MIA PaCa2	D14_3	0.01	1_D14_3_72	S	64	44	440	7.33333	87.1437	87.1437	64.9413	1.34188
1	MIA PaCa2	D14_3	0.01	1_D14_3_72	S	65	45	450	7.5	85.861	85.861	65.8821	1.30325
1	MIA PaCa2	D14_3	0.01	1_D14_3_72	S	66	46	460	7.66667	89.158	89.158	65.7717	1.35557
1	MIA PaCa2	D14_3	0.01	1_D14_3_72	S	67	47	470	7.83333	86.6379	86.6379	65.9693	1.31331
1	MIA PaCa2	D14_3	0.01	1_D14_3_72	S	68	48	480	8	87.5789	87.5789	65.2461	1.34228
1	MIA PaCa2	D14_3	0.01	1_D14_3_72	S	69	49	490	8.16667	87.9968	87.9968	64.9541	1.35475
1	MIA PaCa2	D14_3	0.01	1_D14_3_72	S	70	50	500	8.33333	90.8526	90.8526	64.7238	1.4037
1	MIA PaCa2	D14_3	0.01	1_D14_3_72	S	71	51	510	8.5	94.2163	94.2163	64.8745	1.45229
1	MIA PaCa2	D14_3	0.01	1_D14_3_72	S	72	52	520	8.66667	90.7688	90.7688	65.0075	1.39628
1	MIA PaCa2	D14_3	0.01	1_D14_3_72	S	73	53	530	8.83333	89.9406	89.9406	64.3036	1.39869
1	MIA PaCa2	D14_3	0.01	1_D14_3_72	S	74	54	540	9	89.3117	89.3117	64.0165	1.39514
1	MIA PaCa2	D14_3	0.01	1_D14_3_72	S	75	55	550	9.16667	90.1411	90.1411	64.712	1.39296
1	MIA PaCa2	D14_3	0.01	1_D14_3_72	S	76	56	560	9.33333	90.1306	90.1306	64.0422	1.40736
1	MIA PaCa2	D14_3	0.01	1_D14_3_72	S	77	57	570	9.5	85.9317	85.9317	63.8764	1.34528
1	MIA PaCa2	D14_3	0.01	1_D14_3_72	S	78	58	580	9.66667	91.6826	91.6826	63.7423	1.43833
1	MIA PaCa2	D14_3	0.01	1_D14_3_72	S	79	59	590	9.83333	92.5225	92.5225	63.4249	1.45877
1	MIA PaCa2	D14_3	0.01	1_D14_3_72	S	80	60	600	10	92.142	92.142	63.1512	1.45907
1	MIA PaCa2	D14_3	0.01	1_D14_3_72	S	81	61	610	10.1667	87.9582	87.9582	63.2666	1.39028
1	MIA PaCa2	D14_3	0.01	1_D14_3_72	S	82	62	620	10.3333	89.1411	89.1411	62.8471	1.41838
1	MIA PaCa2	D14_3	0.01	1_D14_3_72	S	83	63	630	10.5	91.9483	91.9483	62.9485	1.46069
1	MIA PaCa2	D14_3	0.01	1_D14_3_72	S	84	64	640	10.6667	86.7552	86.7552	63.5908	1.36427
1	MIA PaCa2	D14_3	0.01	1_D14_3_72	S	85	65	650	10.8333	85.6154	85.6154	63.0209	1.35852
1	MIA PaCa2	D14_3	0.01	1_D14_3_72	S	86	66	660	11	92.8442	92.8442	63.2933	1.46689
1	MIA PaCa2	D14_3	0.01	1_D14_3_72	S	87	67	670	11.1667	88.724	88.724	61.9681	1.43177
1	MIA PaCa2	D14_3	0.01	1_D14_3_72	S	88	68	680	11.3333	89.5127	89.5127	61.0898	1.46526
1	MIA PaCa2	D14_3	0.01	1_D14_3_72	S	89	69	690	11.5	100.388	100.388	61.5941	1.62984
1	MIA PaCa2	D14_3	0.01	1_D14_3_72	S	90	70	700	11.6667	99.8435	99.8435	62.8735	1.58801
1	MIA PaCa2	D14_3	0.01	1_D14_3_72	S	91	71	710	11.8333	95.1611	95.1611	61.5615	1.54579
1	MIA PaCa2	D14_3	0.01	1_D14_3_72	S	92	72	720	12	90.6676	90.6676	60.7859	1.49159
1	MIA PaCa2	D14_3	0.01	1_D14_3_72	S	93	73	730	12.1667	88.7119	88.7119	60.8609	1.45762
1	MIA PaCa2	D14_3	0.01	1_D14_3_72	S	94	74	740	12.3333	107.044	107.044	60.9904	1.7551
1	MIA PaCa2	D14_3	0.01	1_D14_3_72	S	95	75	750	12.5	99.6429	99.6429	61.556	1.61874
1	MIA PaCa2	D14_3	0.01	1_D14_3_72	S	96	76	760	12.6667	92.4656	92.4656	61.3403	1.50742
1	MIA PaCa2	D14_3	0.01	1_D14_3_72	S	97	77	770	12.8333	94.3382	94.3382	61.6391	1.53049
1	MIA PaCa2	D14_3	0.01	1_D14_3_72	S	98	78	780	13	100.994	100.994	60.4758	1.66998
1	MIA PaCa2	D14_3	0.01	1_D14_3_72	S	99	79	790	13.1667	97.1903	97.1903	60.3963	1.60921
1	MIA PaCa2	D14_3	0.01	1_D14_3_72	S	100	80	800	13.3333	96.5415	96.5415	60.7884	1.58816
1	MIA PaCa2	D14_3	0.01	1_D14_3_72	S	101	81	810	13.5	95.9749	95.9749	60.3059	1.59147
1	MIA PaCa2	D14_3	0.01	1_D14_3_72	S	102	82	820	13.6667	107.538	107.538	60.7794	1.76932
1	MIA PaCa2	D14_3	0.01	1_D14_3_72	S	103	83	830	13.8333	95.9916	95.9916	60.5056	1.58649
1	MIA PaCa2	D14_3	0.01	1_D14_3_72	S	104	84	840	14	83.351	83.351	59.623	1.39797
1	MIA PaCa2	D14_3	0.01	1_D14_3_72	S	105	85	850	14.1667	81.8076	81.8076	59.3892	1.37748
1	MIA PaCa2	D14_3	0.01	1_D14_3_72	S	106	86	860	14.3333	82.2896	82.2896	59.9458	1.37273
1	MIA PaCa2	D14_3	0.01	1_D14_3_72	S	107	87	870	14.5	81.0815	81.0815	59.293	1.36747
1	MIA PaCa2	D14_3	0.01	1_D14_3_72	S	108	88	880	14.6667	99.8051	99.8051	59.7326	1.67086
1	MIA PaCa2	D14_3	0.01	1_D14_3_72	S	109	89	890	14.8333	98.0517	98.0517	59.2145	1.65587
1	MIA PaCa2	D14_3	0.01	1_D14_3_72	S	110	90	900	15	101.065	101.065	59.5265	1.69782
1	MIA PaCa2	D14_3	0.01	1_D14_3_72	S	111	91	910	15.1667	87.2877	87.2877	22.61	3.86057
1	MIA PaCa2	D14_3	0.01	1_D14_3_72	S	112	92	920	15.3333	31.9668	31.9668	22.6798	1.40948
1	MIA PaCa2	D14_3	0.01	1_D14_3_74	G1	19	-1	-10	-0.166667	80.2308	80.2308	82.0129	0.978271
1	MIA PaCa2	D14_3	0.01	1_D14_3_74	G1	20	0	0	0	86.0655	86.0655	81.1847	1.06012
1	MIA PaCa2	D14_3	0.01	1_D14_3_74	G1	21	1	10	0.166667	83.0536	83.0536	84.5183	0.98267
1	MIA PaCa2	D14_3	0.01	1_D14_3_74	G1	22	2	20	0.333333	81.4538	81.4538	82.9015	0.982537
1	MIA PaCa2	D14_3	0.01	1_D14_3_74	G1	23	3	30	0.5	84.4322	84.4322	82.0655	1.02884
1	MIA PaCa2	D14_3	0.01	1_D14_3_74	G1	25	5	50	0.833333	80.2082	80.2082	80.691	0.994017
1	MIA PaCa2	D14_3	0.01	1_D14_3_74	G1	26	6	60	1	81.9331	81.9331	79.6097	1.02919
1	MIA PaCa2	D14_3	0.01	1_D14_3_74	G1	27	7	70	1.16667	82.9174	82.9174	79.1117	1.04811
1	MIA PaCa2	D14_3	0.01	1_D14_3_74	G1	28	8	80	1.33333	81.9737	81.9737	78.0016	1.05092
1	MIA PaCa2	D14_3	0.01	1_D14_3_74	G1	29	9	90	1.5	78.6555	78.6555	77.8528	1.01031
1	MIA PaCa2	D14_3	0.01	1_D14_3_74	G1	30	10	100	1.66667	81.3348	81.3348	77.6698	1.04719
1	MIA PaCa2	D14_3	0.01	1_D14_3_74	G1	31	11	110	1.83333	81.0229	81.0229	77.1169	1.05065
1	MIA PaCa2	D14_3	0.01	1_D14_3_74	G1	32	12	120	2	81.9865	81.9865	76.7701	1.06795
1	MIA PaCa2	D14_3	0.01	1_D14_3_74	G1	33	13	130	2.16667	80.3317	80.3317	75.9843	1.05721
1	MIA PaCa2	D14_3	0.01	1_D14_3_74	G1	34	14	140	2.33333	79.455	79.455	75.0842	1.05821
1	MIA PaCa2	D14_3	0.01	1_D14_3_74	G1	35	15	150	2.5	81.378	81.378	75.707	1.07491
1	MIA PaCa2	D14_3	0.01	1_D14_3_74	G1	36	16	160	2.66667	80.1918	80.1918	74.2775	1.07962
1	MIA PaCa2	D14_3	0.01	1_D14_3_74	G1	37	17	170	2.83333	80.2965	80.2965	73.2738	1.09584
1	MIA PaCa2	D14_3	0.01	1_D14_3_74	G1	38	18	180	3	82.8182	82.8182	73.1743	1.13179
1	MIA PaCa2	D14_3	0.01	1_D14_3_74	G1	39	19	190	3.16667	83.8028	83.8028	72.5019	1.15587
1	MIA PaCa2	D14_3	0.01	1_D14_3_74	G1	40	20	200	3.33333	80.6232	80.6232	71.7669	1.1234
1	MIA PaCa2	D14_3	0.01	1_D14_3_74	G1	41	21	210	3.5	84.5023	84.5023	72.0161	1.17338
1	MIA PaCa2	D14_3	0.01	1_D14_3_74	G1	42	22	220	3.66667	87.7137	87.7137	71.8185	1.22132
1	MIA PaCa2	D14_3	0.01	1_D14_3_74	G1	43	23	230	3.83333	84.5495	84.5495	71.1314	1.18864
1	MIA PaCa2	D14_3	0.01	1_D14_3_74	G1	44	24	240	4	85.0714	85.0714	70.5922	1.20511
1	MIA PaCa2	D14_3	0.01	1_D14_3_74	G1	45	25	250	4.16667	86.3167	86.3167	70.3088	1.22768
1	MIA PaCa2	D14_3	0.01	1_D14_3_74	G1	46	26	260	4.33333	91.3937	91.3937	70.5953	1.29461
1	MIA PaCa2	D14_3	0.01	1_D14_3_74	G1	47	27	270	4.5	89.9227	89.9227	70.0862	1.28303
1	MIA PaCa2	D14_3	0.01	1_D14_3_74	G1	48	28	280	4.66667	88.6701	88.6701	69.4746	1.27629
1	MIA PaCa2	D14_3	0.01	1_D14_3_74	G1	49	29	290	4.83333	92.6857	92.6857	68.6304	1.3505
1	MIA PaCa2	D14_3	0.01	1_D14_3_74	G1	50	30	300	5	90.6267	90.6267	68.8548	1.3162
1	MIA PaCa2	D14_3	0.01	1_D14_3_74	G1	51	31	310	5.16667	85.7136	85.7136	68.1679	1.25739
1	MIA PaCa2	D14_3	0.01	1_D14_3_74	G1	52	32	320	5.33333	82.7672	82.7672	67.3507	1.2289
1	MIA PaCa2	D14_3	0.01	1_D14_3_74	G1	53	33	330	5.5	90.0645	90.0645	67.9219	1.326
1	MIA PaCa2	D14_3	0.01	1_D14_3_74	G1	54	34	340	5.66667	92.6376	92.6376	68.0349	1.36162
1	MIA PaCa2	D14_3	0.01	1_D14_3_74	G1	55	35	350	5.83333	87.9336	87.9336	68.887	1.27649
1	MIA PaCa2	D14_3	0.01	1_D14_3_74	G1	57	37	370	6.16667	91.9097	91.9097	67.2471	1.36674
1	MIA PaCa2	D14_3	0.01	1_D14_3_74	G1	58	38	380	6.33333	83.668	83.668	67.1163	1.24661
1	MIA PaCa2	D14_3	0.01	1_D14_3_74	G1	59	39	390	6.5	80.101	80.101	66.9979	1.19558
1	MIA PaCa2	D14_3	0.01	1_D14_3_74	G1	60	40	400	6.66667	89.662	89.662	66.8466	1.34131
1	MIA PaCa2	D14_3	0.01	1_D14_3_74	G1	61	41	410	6.83333	84.3164	84.3164	66.872	1.26086
1	MIA PaCa2	D14_3	0.01	1_D14_3_74	G1	62	42	420	7	77.3365	77.3365	67.4151	1.14717
1	MIA PaCa2	D14_3	0.01	1_D14_3_74	G1	63	43	430	7.16667	78.1457	78.1457	66.593	1.17348
1	MIA PaCa2	D14_3	0.01	1_D14_3_74	G1	64	44	440	7.33333	83.2197	83.2197	64.9413	1.28146
1	MIA PaCa2	D14_3	0.01	1_D14_3_74	G1	65	45	450	7.5	75.022	75.022	65.8821	1.13873
1	MIA PaCa2	D14_3	0.01	1_D14_3_74	G1	66	46	460	7.66667	95.2679	95.2679	65.7717	1.44846
1	MIA PaCa2	D14_3	0.01	1_D14_3_74	G1	67	47	470	7.83333	76.5582	76.5582	65.9693	1.16051
1	MIA PaCa2	D14_3	0.01	1_D14_3_74	G1	68	48	480	8	82.2932	82.2932	65.2461	1.26127
1	MIA PaCa2	D14_3	0.01	1_D14_3_74	G1	69	49	490	8.16667	81.2795	81.2795	64.9541	1.25134
1	MIA PaCa2	D14_3	0.01	1_D14_3_74	G1	70	50	500	8.33333	85.2222	85.2222	64.7238	1.31671
1	MIA PaCa2	D14_3	0.01	1_D14_3_74	G1	71	51	510	8.5	87.6547	87.6547	64.8745	1.35114
1	MIA PaCa2	D14_3	0.01	1_D14_3_74	G1	72	52	520	8.66667	81.4317	81.4317	65.0075	1.25265
1	MIA PaCa2	D14_3	0.01	1_D14_3_74	G1	73	53	530	8.83333	79.3808	79.3808	64.3036	1.23447
1	MIA PaCa2	D14_3	0.01	1_D14_3_74	G1	75	55	550	9.16667	77.52	77.52	64.712	1.19792
1	MIA PaCa2	D14_3	0.01	1_D14_3_74	G1	76	56	560	9.33333	81.0892	81.0892	64.0422	1.26618
1	MIA PaCa2	D14_3	0.01	1_D14_3_74	G1	77	57	570	9.5	76.8901	76.8901	63.8764	1.20373
1	MIA PaCa2	D14_3	0.01	1_D14_3_74	G1	78	58	580	9.66667	76.0828	76.0828	63.7423	1.1936
1	MIA PaCa2	D14_3	0.01	1_D14_3_74	G1	79	59	590	9.83333	73.7158	73.7158	63.4249	1.16225
1	MIA PaCa2	D14_3	0.01	1_D14_3_74	G1	80	60	600	10	74.9745	74.9745	63.1512	1.18722
1	MIA PaCa2	D14_3	0.01	1_D14_3_74	G1	81	61	610	10.1667	80.1298	80.1298	63.2666	1.26654
1	MIA PaCa2	D14_3	0.01	1_D14_3_74	G1	82	62	620	10.3333	78.184	78.184	62.8471	1.24403
1	MIA PaCa2	D14_3	0.01	1_D14_3_74	G1	83	63	630	10.5	81.6849	81.6849	62.9485	1.29765
1	MIA PaCa2	D14_3	0.01	1_D14_3_74	G1	84	64	640	10.6667	82.2161	82.2161	63.5908	1.29289
1	MIA PaCa2	D14_3	0.01	1_D14_3_74	G1	85	65	650	10.8333	83.4784	83.4784	63.0209	1.32461
1	MIA PaCa2	D14_3	0.01	1_D14_3_74	G1	86	66	660	11	80.7867	80.7867	63.2933	1.27639
1	MIA PaCa2	D14_3	0.01	1_D14_3_74	G1	87	67	670	11.1667	82.7993	82.7993	61.9681	1.33616
1	MIA PaCa2	D14_3	0.01	1_D14_3_74	G1	88	68	680	11.3333	80.6993	80.6993	61.0898	1.321
1	MIA PaCa2	D14_3	0.01	1_D14_3_74	G1	89	69	690	11.5	79.0137	79.0137	61.5941	1.28281
1	MIA PaCa2	D14_3	0.01	1_D14_3_74	G1	91	71	710	11.8333	76.3584	76.3584	61.5615	1.24036
1	MIA PaCa2	D14_3	0.01	1_D14_3_74	G1	92	72	720	12	76.1442	76.1442	60.7859	1.25266
1	MIA PaCa2	D14_3	0.01	1_D14_3_74	G1	93	73	730	12.1667	75.6527	75.6527	60.8609	1.24304
1	MIA PaCa2	D14_3	0.01	1_D14_3_74	G1	94	74	740	12.3333	72.3438	72.3438	60.9904	1.18615
1	MIA PaCa2	D14_3	0.01	1_D14_3_74	G1	95	75	750	12.5	71.4827	71.4827	61.556	1.16126
1	MIA PaCa2	D14_3	0.01	1_D14_3_74	G1	96	76	760	12.6667	69.8431	69.8431	61.3403	1.13862
1	MIA PaCa2	D14_3	0.01	1_D14_3_74	G1	97	77	770	12.8333	71.3569	71.3569	61.6391	1.15766
1	MIA PaCa2	D14_3	0.01	1_D14_3_74	G1	98	78	780	13	70.9772	70.9772	60.4758	1.17365
1	MIA PaCa2	D14_3	0.01	1_D14_3_74	G1	99	79	790	13.1667	73.3195	73.3195	60.3963	1.21397
1	MIA PaCa2	D14_3	0.01	1_D14_3_74	G1	100	80	800	13.3333	73.6267	73.6267	60.7884	1.2112
1	MIA PaCa2	D14_3	0.01	1_D14_3_74	G1	101	81	810	13.5	72.9879	72.9879	60.3059	1.21029
1	MIA PaCa2	D14_3	0.01	1_D14_3_74	G1	102	82	820	13.6667	72.0579	72.0579	60.7794	1.18556
1	MIA PaCa2	D14_3	0.01	1_D14_3_74	G1	103	83	830	13.8333	72.4583	72.4583	60.5056	1.19755
1	MIA PaCa2	D14_3	0.01	1_D14_3_74	G1	104	84	840	14	68.6951	68.6951	59.623	1.15216
1	MIA PaCa2	D14_3	0.01	1_D14_3_74	G1	105	85	850	14.1667	69.6627	69.6627	59.3892	1.17299
1	MIA PaCa2	D14_3	0.01	1_D14_3_74	G1	106	86	860	14.3333	69.1613	69.1613	59.9458	1.15373
1	MIA PaCa2	D14_3	0.01	1_D14_3_74	G1	107	87	870	14.5	67.8036	67.8036	59.293	1.14353
1	MIA PaCa2	D14_3	0.01	1_D14_3_74	G1	108	88	880	14.6667	68.3788	68.3788	59.7326	1.14475
1	MIA PaCa2	D14_3	0.01	1_D14_3_74	G1	109	89	890	14.8333	70.739	70.739	59.2145	1.19462
1	MIA PaCa2	D14_3	0.01	1_D14_3_74	G1	110	90	900	15	72.2277	72.2277	59.5265	1.21337
1	MIA PaCa2	D14_3	0.01	1_D14_3_74	G1	111	91	910	15.1667	71.0251	71.0251	22.61	3.14131
1	MIA PaCa2	D14_3	0.01	1_D14_3_74	G1	112	92	920	15.3333	26.7575	26.7575	22.6798	1.1798
1	MIA PaCa2	D14_3	0.01	1_D14_3_74	G1	113	93	930	15.5	27.3133	27.3133	22.7253	1.20189
1	MIA PaCa2	D14_3	0.01	1_D14_3_74	G1	114	94	940	15.6667	27.2414	27.2414	22.5639	1.2073
1	MIA PaCa2	D14_3	0.01	1_D14_3_74	G1	115	95	950	15.8333	28.7468	28.7468	22.4399	1.28106
1	MIA PaCa2	D14_3	0.01	1_D14_3_74	G1	116	96	960	16	27.5605	27.5605	22.771	1.21033
1	MIA PaCa2	D14_3	0.01	1_D14_3_74	G1	117	97	970	16.1667	26.3835	26.3835	22.6665	1.16398
1	MIA PaCa2	D14_3	0.01	1_D14_3_74	G1	118	98	980	16.3333	28.4281	28.4281	23.0617	1.2327
1	MIA PaCa2	D14_3	0.01	1_D14_3_74	G1	119	99	990	16.5	27.2471	27.2471	22.7043	1.20009
1	MIA PaCa2	D14_3	0.01	1_D14_3_74	G1	120	100	1000	16.6667	28.1398	28.1398	22.9546	1.22589
1	MIA PaCa2	D14_3	0.01	1_D14_3_74	G1	121	101	1010	16.8333	27.3894	27.3894	23.1818	1.1815
1	MIA PaCa2	D14_3	0.01	1_D14_3_74	G1	122	102	1020	17	26.8784	26.8784	22.9702	1.17014
1	MIA PaCa2	D14_3	0.01	1_D14_3_74	G1	123	103	1030	17.1667	27.3866	27.3866	22.8295	1.19961
1	MIA PaCa2	D14_3	0.01	1_D14_3_74	G1	124	104	1040	17.3333	26.9369	26.9369	22.8913	1.17673
1	MIA PaCa2	D14_3	0.01	1_D14_3_74	G1	125	105	1050	17.5	28.3077	28.3077	22.9525	1.23332
1	MIA PaCa2	D14_3	0.01	1_D14_3_76	G1	16	-4	-40	-0.666667	80.1415	80.1415	82.5286	0.971076
1	MIA PaCa2	D14_3	0.01	1_D14_3_76	G1	17	-3	-30	-0.5	79.1065	79.1065	83.098	0.951966
1	MIA PaCa2	D14_3	0.01	1_D14_3_76	G1	18	-2	-20	-0.333333	77.6422	77.6422	82.7797	0.937938
1	MIA PaCa2	D14_3	0.01	1_D14_3_76	G1	19	-1	-10	-0.166667	74.2554	74.2554	82.0129	0.905411
1	MIA PaCa2	D14_3	0.01	1_D14_3_76	G1	20	0	0	0	72.7083	72.7083	81.1847	0.895591
1	MIA PaCa2	D14_3	0.01	1_D14_3_76	G1	21	1	10	0.166667	77.8229	77.8229	84.5183	0.920782
1	MIA PaCa2	D14_3	0.01	1_D14_3_76	G1	22	2	20	0.333333	81.2405	81.2405	82.9015	0.979964
1	MIA PaCa2	D14_3	0.01	1_D14_3_76	G1	23	3	30	0.5	85.6544	85.6544	82.0655	1.04373
1	MIA PaCa2	D14_3	0.01	1_D14_3_76	G1	24	4	40	0.666667	85.7941	85.7941	80.9707	1.05957
1	MIA PaCa2	D14_3	0.01	1_D14_3_76	G1	25	5	50	0.833333	87.8511	87.8511	80.691	1.08874
1	MIA PaCa2	D14_3	0.01	1_D14_3_76	G1	26	6	60	1	86.4632	86.4632	79.6097	1.08609
1	MIA PaCa2	D14_3	0.01	1_D14_3_76	G1	27	7	70	1.16667	85.2895	85.2895	79.1117	1.07809
1	MIA PaCa2	D14_3	0.01	1_D14_3_76	G1	28	8	80	1.33333	84.7174	84.7174	78.0016	1.0861
1	MIA PaCa2	D14_3	0.01	1_D14_3_76	G1	29	9	90	1.5	82.7417	82.7417	77.8528	1.0628
1	MIA PaCa2	D14_3	0.01	1_D14_3_76	G1	30	10	100	1.66667	83.0207	83.0207	77.6698	1.06889
1	MIA PaCa2	D14_3	0.01	1_D14_3_76	G1	31	11	110	1.83333	81.965	81.965	77.1169	1.06287
1	MIA PaCa2	D14_3	0.01	1_D14_3_76	G1	32	12	120	2	81.6226	81.6226	76.7701	1.06321
1	MIA PaCa2	D14_3	0.01	1_D14_3_76	G1	33	13	130	2.16667	82.4182	82.4182	75.9843	1.08467
1	MIA PaCa2	D14_3	0.01	1_D14_3_76	G1	34	14	140	2.33333	81.5686	81.5686	75.0842	1.08636
1	MIA PaCa2	D14_3	0.01	1_D14_3_76	G1	35	15	150	2.5	81.4555	81.4555	75.707	1.07593
1	MIA PaCa2	D14_3	0.01	1_D14_3_76	G1	36	16	160	2.66667	80.8245	80.8245	74.2775	1.08814
1	MIA PaCa2	D14_3	0.01	1_D14_3_76	G1	37	17	170	2.83333	82.76	82.76	73.2738	1.12946
1	MIA PaCa2	D14_3	0.01	1_D14_3_76	G1	38	18	180	3	81.2606	81.2606	73.1743	1.11051
1	MIA PaCa2	D14_3	0.01	1_D14_3_76	G1	39	19	190	3.16667	79.9231	79.9231	72.5019	1.10236
1	MIA PaCa2	D14_3	0.01	1_D14_3_76	G1	40	20	200	3.33333	77.5856	77.5856	71.7669	1.08108
1	MIA PaCa2	D14_3	0.01	1_D14_3_76	G1	41	21	210	3.5	77.754	77.754	72.0161	1.07967
1	MIA PaCa2	D14_3	0.01	1_D14_3_76	G1	42	22	220	3.66667	77.0629	77.0629	71.8185	1.07302
1	MIA PaCa2	D14_3	0.01	1_D14_3_76	G1	43	23	230	3.83333	76.9414	76.9414	71.1314	1.08168
1	MIA PaCa2	D14_3	0.01	1_D14_3_76	G1	44	24	240	4	75.3243	75.3243	70.5922	1.06703
1	MIA PaCa2	D14_3	0.01	1_D14_3_76	G1	45	25	250	4.16667	82.9752	82.9752	70.3088	1.18015
1	MIA PaCa2	D14_3	0.01	1_D14_3_76	G1	46	26	260	4.33333	78.2538	78.2538	70.5953	1.10848
1	MIA PaCa2	D14_3	0.01	1_D14_3_76	G1	47	27	270	4.5	78.8754	78.8754	70.0862	1.12541
1	MIA PaCa2	D14_3	0.01	1_D14_3_76	G1	48	28	280	4.66667	80.6118	80.6118	69.4746	1.16031
1	MIA PaCa2	D14_3	0.01	1_D14_3_76	G1	49	29	290	4.83333	75.9967	75.9967	68.6304	1.10733
1	MIA PaCa2	D14_3	0.01	1_D14_3_76	G1	50	30	300	5	71.7525	71.7525	68.8548	1.04208
1	MIA PaCa2	D14_3	0.01	1_D14_3_76	G1	51	31	310	5.16667	71.5556	71.5556	68.1679	1.0497
1	MIA PaCa2	D14_3	0.01	1_D14_3_76	G1	52	32	320	5.33333	71.3739	71.3739	67.3507	1.05974
1	MIA PaCa2	D14_3	0.01	1_D14_3_76	G1	53	33	330	5.5	74.1994	74.1994	67.9219	1.09242
1	MIA PaCa2	D14_3	0.01	1_D14_3_76	G1	54	34	340	5.66667	74.9343	74.9343	68.0349	1.10141
1	MIA PaCa2	D14_3	0.01	1_D14_3_76	G1	55	35	350	5.83333	74.8018	74.8018	68.887	1.08586
1	MIA PaCa2	D14_3	0.01	1_D14_3_76	G1	56	36	360	6	76.4937	76.4937	68.1633	1.12221
1	MIA PaCa2	D14_3	0.01	1_D14_3_76	G1	57	37	370	6.16667	75.0476	75.0476	67.2471	1.116
1	MIA PaCa2	D14_3	0.01	1_D14_3_76	G1	58	38	380	6.33333	73	73	67.1163	1.08766
1	MIA PaCa2	D14_3	0.01	1_D14_3_76	G1	59	39	390	6.5	72.2835	72.2835	66.9979	1.07889
1	MIA PaCa2	D14_3	0.01	1_D14_3_76	G1	60	40	400	6.66667	71.9172	71.9172	66.8466	1.07585
1	MIA PaCa2	D14_3	0.01	1_D14_3_76	G1	61	41	410	6.83333	69.659	69.659	66.872	1.04168
1	MIA PaCa2	D14_3	0.01	1_D14_3_76	G1	62	42	420	7	70.0453	70.0453	67.4151	1.03902
1	MIA PaCa2	D14_3	0.01	1_D14_3_76	G1	63	43	430	7.16667	69.2555	69.2555	66.593	1.03998
1	MIA PaCa2	D14_3	0.01	1_D14_3_76	G1	64	44	440	7.33333	69.929	69.929	64.9413	1.0768
1	MIA PaCa2	D14_3	0.01	1_D14_3_76	G1	65	45	450	7.5	73.7814	73.7814	65.8821	1.1199
1	MIA PaCa2	D14_3	0.01	1_D14_3_76	G1	66	46	460	7.66667	73.6065	73.6065	65.7717	1.11912
1	MIA PaCa2	D14_3	0.01	1_D14_3_76	G1	67	47	470	7.83333	72.116	72.116	65.9693	1.09318
1	MIA PaCa2	D14_3	0.01	1_D14_3_76	G1	68	48	480	8	71.0064	71.0064	65.2461	1.08829
1	MIA PaCa2	D14_3	0.01	1_D14_3_76	G1	69	49	490	8.16667	70.6258	70.6258	64.9541	1.08732
1	MIA PaCa2	D14_3	0.01	1_D14_3_76	G1	70	50	500	8.33333	68.7675	68.7675	64.7238	1.06248
1	MIA PaCa2	D14_3	0.01	1_D14_3_76	G1	71	51	510	8.5	71.2118	71.2118	64.8745	1.09769
1	MIA PaCa2	D14_3	0.01	1_D14_3_76	G1	72	52	520	8.66667	71.4704	71.4704	65.0075	1.09942
1	MIA PaCa2	D14_3	0.01	1_D14_3_76	G1	73	53	530	8.83333	69.9389	69.9389	64.3036	1.08764
1	MIA PaCa2	D14_3	0.01	1_D14_3_76	G1	74	54	540	9	70.9807	70.9807	64.0165	1.10879
1	MIA PaCa2	D14_3	0.01	1_D14_3_76	G1	75	55	550	9.16667	74.5909	74.5909	64.712	1.15266
1	MIA PaCa2	D14_3	0.01	1_D14_3_76	G1	76	56	560	9.33333	76.122	76.122	64.0422	1.18862
1	MIA PaCa2	D14_3	0.01	1_D14_3_76	G1	77	57	570	9.5	71.1041	71.1041	63.8764	1.11315
1	MIA PaCa2	D14_3	0.01	1_D14_3_76	G1	78	58	580	9.66667	70.7053	70.7053	63.7423	1.10924
1	MIA PaCa2	D14_3	0.01	1_D14_3_76	G1	79	59	590	9.83333	75.3527	75.3527	63.4249	1.18806
1	MIA PaCa2	D14_3	0.01	1_D14_3_76	G1	80	60	600	10	74.0034	74.0034	63.1512	1.17184
1	MIA PaCa2	D14_3	0.01	1_D14_3_76	G1	81	61	610	10.1667	73.3719	73.3719	63.2666	1.15973
1	MIA PaCa2	D14_3	0.01	1_D14_3_76	G1	82	62	620	10.3333	72.7742	72.7742	62.8471	1.15796
1	MIA PaCa2	D14_3	0.01	1_D14_3_76	G1	83	63	630	10.5	71.7949	71.7949	62.9485	1.14053
1	MIA PaCa2	D14_3	0.01	1_D14_3_76	G1	84	64	640	10.6667	68.1863	68.1863	63.5908	1.07227
1	MIA PaCa2	D14_3	0.01	1_D14_3_76	G1	85	65	650	10.8333	71.7241	71.7241	63.0209	1.1381
1	MIA PaCa2	D14_3	0.01	1_D14_3_76	G1	86	66	660	11	74.5232	74.5232	63.2933	1.17743
1	MIA PaCa2	D14_3	0.01	1_D14_3_76	G1	87	67	670	11.1667	74.8713	74.8713	61.9681	1.20822
1	MIA PaCa2	D14_3	0.01	1_D14_3_76	G1	88	68	680	11.3333	66.1467	66.1467	61.0898	1.08278
1	MIA PaCa2	D14_3	0.01	1_D14_3_76	G1	89	69	690	11.5	66.1167	66.1167	61.5941	1.07343
1	MIA PaCa2	D14_3	0.01	1_D14_3_76	G1	90	70	700	11.6667	67.8862	67.8862	62.8735	1.07973
1	MIA PaCa2	D14_3	0.01	1_D14_3_76	G1	91	71	710	11.8333	67.3758	67.3758	61.5615	1.09445
1	MIA PaCa2	D14_3	0.01	1_D14_3_76	G1	92	72	720	12	65.3177	65.3177	60.7859	1.07455
1	MIA PaCa2	D14_3	0.01	1_D14_3_76	G1	93	73	730	12.1667	67.9284	67.9284	60.8609	1.11613
1	MIA PaCa2	D14_3	0.01	1_D14_3_76	G1	94	74	740	12.3333	62.7219	62.7219	60.9904	1.02839
1	MIA PaCa2	D14_3	0.01	1_D14_3_76	G1	95	75	750	12.5	64.3114	64.3114	61.556	1.04476
1	MIA PaCa2	D14_3	0.01	1_D14_3_76	G1	96	76	760	12.6667	64.2287	64.2287	61.3403	1.04709
1	MIA PaCa2	D14_3	0.01	1_D14_3_76	G1	97	77	770	12.8333	72.4844	72.4844	61.6391	1.17595
1	MIA PaCa2	D14_3	0.01	1_D14_3_76	G1	98	78	780	13	68.3646	68.3646	60.4758	1.13045
1	MIA PaCa2	D14_4	0.01	1_D14_4_100	S	12	-8	-80	-1.33333	91.3065	91.3065	86.2825	1.05823
1	MIA PaCa2	D14_4	0.01	1_D14_4_100	S	14	-6	-60	-1	83.497	83.497	85.6506	0.974856
1	MIA PaCa2	D14_4	0.01	1_D14_4_100	S	15	-5	-50	-0.833333	83.5987	83.5987	84.1405	0.993561
1	MIA PaCa2	D14_4	0.01	1_D14_4_100	S	16	-4	-40	-0.666667	86.2249	86.2249	82.5286	1.04479
1	MIA PaCa2	D14_4	0.01	1_D14_4_100	S	17	-3	-30	-0.5	83.3893	83.3893	83.098	1.00351
1	MIA PaCa2	D14_4	0.01	1_D14_4_100	S	18	-2	-20	-0.333333	84.7719	84.7719	82.7797	1.02407
1	MIA PaCa2	D14_4	0.01	1_D14_4_100	S	19	-1	-10	-0.166667	82.1199	82.1199	82.0129	1.0013
1	MIA PaCa2	D14_4	0.01	1_D14_4_100	S	20	0	0	0	81.8312	81.8312	81.1847	1.00796
1	MIA PaCa2	D14_4	0.01	1_D14_4_100	S	21	1	10	0.166667	91.5448	91.5448	84.5183	1.08314
1	MIA PaCa2	D14_4	0.01	1_D14_4_100	S	22	2	20	0.333333	89.4252	89.4252	82.9015	1.07869
1	MIA PaCa2	D14_4	0.01	1_D14_4_100	S	23	3	30	0.5	95.89	95.89	82.0655	1.16846
1	MIA PaCa2	D14_4	0.01	1_D14_4_100	S	24	4	40	0.666667	97.704	97.704	80.9707	1.20666
1	MIA PaCa2	D14_4	0.01	1_D14_4_100	S	25	5	50	0.833333	96.955	96.955	80.691	1.20156
1	MIA PaCa2	D14_4	0.01	1_D14_4_100	S	26	6	60	1	92.0197	92.0197	79.6097	1.15589
1	MIA PaCa2	D14_4	0.01	1_D14_4_100	S	27	7	70	1.16667	93.1281	93.1281	79.1117	1.17717
1	MIA PaCa2	D14_4	0.01	1_D14_4_100	S	28	8	80	1.33333	89.8127	89.8127	78.0016	1.15142
1	MIA PaCa2	D14_4	0.01	1_D14_4_100	S	29	9	90	1.5	89.976	89.976	77.8528	1.15572
1	MIA PaCa2	D14_4	0.01	1_D14_4_100	S	30	10	100	1.66667	88.1886	88.1886	77.6698	1.13543
1	MIA PaCa2	D14_4	0.01	1_D14_4_100	S	31	11	110	1.83333	88.7799	88.7799	77.1169	1.15124
1	MIA PaCa2	D14_4	0.01	1_D14_4_100	S	32	12	120	2	90.785	90.785	76.7701	1.18256
1	MIA PaCa2	D14_4	0.01	1_D14_4_100	S	33	13	130	2.16667	91.147	91.147	75.9843	1.19955
1	MIA PaCa2	D14_4	0.01	1_D14_4_100	S	34	14	140	2.33333	90.827	90.827	75.0842	1.20967
1	MIA PaCa2	D14_4	0.01	1_D14_4_100	S	35	15	150	2.5	88.5533	88.5533	75.707	1.16968
1	MIA PaCa2	D14_4	0.01	1_D14_4_100	S	36	16	160	2.66667	89.719	89.719	74.2775	1.20789
1	MIA PaCa2	D14_4	0.01	1_D14_4_100	S	37	17	170	2.83333	85.4887	85.4887	73.2738	1.1667
1	MIA PaCa2	D14_4	0.01	1_D14_4_100	S	38	18	180	3	86.0503	86.0503	73.1743	1.17596
1	MIA PaCa2	D14_4	0.01	1_D14_4_100	S	39	19	190	3.16667	84.0353	84.0353	72.5019	1.15908
1	MIA PaCa2	D14_4	0.01	1_D14_4_100	S	40	20	200	3.33333	80.4933	80.4933	71.7669	1.12159
1	MIA PaCa2	D14_4	0.01	1_D14_4_100	S	41	21	210	3.5	82.1201	82.1201	72.0161	1.1403
1	MIA PaCa2	D14_4	0.01	1_D14_4_100	S	42	22	220	3.66667	82.936	82.936	71.8185	1.1548
1	MIA PaCa2	D14_4	0.01	1_D14_4_100	S	43	23	230	3.83333	79.9121	79.9121	71.1314	1.12344
1	MIA PaCa2	D14_4	0.01	1_D14_4_100	S	44	24	240	4	85.6279	85.6279	70.5922	1.21299
1	MIA PaCa2	D14_4	0.01	1_D14_4_100	S	45	25	250	4.16667	79.0096	79.0096	70.3088	1.12375
1	MIA PaCa2	D14_4	0.01	1_D14_4_100	S	46	26	260	4.33333	80.6484	80.6484	70.5953	1.1424
1	MIA PaCa2	D14_4	0.01	1_D14_4_100	S	47	27	270	4.5	76.5697	76.5697	70.0862	1.09251
1	MIA PaCa2	D14_4	0.01	1_D14_4_100	S	48	28	280	4.66667	75.2562	75.2562	69.4746	1.08322
1	MIA PaCa2	D14_4	0.01	1_D14_4_100	S	49	29	290	4.83333	73.7488	73.7488	68.6304	1.07458
1	MIA PaCa2	D14_4	0.01	1_D14_4_100	S	50	30	300	5	71.5872	71.5872	68.8548	1.03968
1	MIA PaCa2	D14_4	0.01	1_D14_4_100	S	51	31	310	5.16667	70.6	70.6	68.1679	1.03568
1	MIA PaCa2	D14_4	0.01	1_D14_4_100	S	52	32	320	5.33333	70.1941	70.1941	67.3507	1.04222
1	MIA PaCa2	D14_4	0.01	1_D14_4_100	S	53	33	330	5.5	70.3643	70.3643	67.9219	1.03596
1	MIA PaCa2	D14_4	0.01	1_D14_4_100	S	54	34	340	5.66667	70.1566	70.1566	68.0349	1.03119
1	MIA PaCa2	D14_4	0.01	1_D14_4_100	S	55	35	350	5.83333	69.7591	69.7591	68.887	1.01266
1	MIA PaCa2	D14_4	0.01	1_D14_4_100	S	56	36	360	6	68.3705	68.3705	68.1633	1.00304
1	MIA PaCa2	D14_4	0.01	1_D14_4_100	S	57	37	370	6.16667	67.5402	67.5402	67.2471	1.00436
1	MIA PaCa2	D14_4	0.01	1_D14_4_100	S	58	38	380	6.33333	67.8252	67.8252	67.1163	1.01056
1	MIA PaCa2	D14_4	0.01	1_D14_4_100	S	59	39	390	6.5	68.3424	68.3424	66.9979	1.02007
1	MIA PaCa2	D14_4	0.01	1_D14_4_100	S	60	40	400	6.66667	67.8484	67.8484	66.8466	1.01499
1	MIA PaCa2	D14_4	0.01	1_D14_4_100	S	61	41	410	6.83333	68.2888	68.2888	66.872	1.02119
1	MIA PaCa2	D14_4	0.01	1_D14_4_100	S	62	42	420	7	66.8981	66.8981	67.4151	0.992331
1	MIA PaCa2	D14_4	0.01	1_D14_4_100	S	63	43	430	7.16667	66.1553	66.1553	66.593	0.993427
1	MIA PaCa2	D14_4	0.01	1_D14_4_100	S	64	44	440	7.33333	65.5756	65.5756	64.9413	1.00977
1	MIA PaCa2	D14_4	0.01	1_D14_4_100	S	65	45	450	7.5	67.2389	67.2389	65.8821	1.02059
1	MIA PaCa2	D14_4	0.01	1_D14_4_100	S	66	46	460	7.66667	66.932	66.932	65.7717	1.01764
1	MIA PaCa2	D14_4	0.01	1_D14_4_100	S	67	47	470	7.83333	67.2721	67.2721	65.9693	1.01975
1	MIA PaCa2	D14_4	0.01	1_D14_4_100	S	68	48	480	8	67.8463	67.8463	65.2461	1.03985
1	MIA PaCa2	D14_4	0.01	1_D14_4_100	S	69	49	490	8.16667	65.92	65.92	64.9541	1.01487
1	MIA PaCa2	D14_4	0.01	1_D14_4_100	S	70	50	500	8.33333	64.9849	64.9849	64.7238	1.00403
1	MIA PaCa2	D14_4	0.01	1_D14_4_100	S	71	51	510	8.5	63.3714	63.3714	64.8745	0.976831
1	MIA PaCa2	D14_4	0.01	1_D14_4_100	S	72	52	520	8.66667	63.3088	63.3088	65.0075	0.973869
1	MIA PaCa2	D14_4	0.01	1_D14_4_100	S	73	53	530	8.83333	62.44	62.44	64.3036	0.971019
1	MIA PaCa2	D14_4	0.01	1_D14_4_100	S	74	54	540	9	62.2895	62.2895	64.0165	0.973023
1	MIA PaCa2	D14_4	0.01	1_D14_4_100	S	75	55	550	9.16667	61.6086	61.6086	64.712	0.952043
1	MIA PaCa2	D14_4	0.01	1_D14_4_100	S	76	56	560	9.33333	62.1962	62.1962	64.0422	0.971175
1	MIA PaCa2	D14_4	0.01	1_D14_4_100	S	77	57	570	9.5	63.3841	63.3841	63.8764	0.992292
1	MIA PaCa2	D14_4	0.01	1_D14_4_100	S	78	58	580	9.66667	62.4706	62.4706	63.7423	0.98005
1	MIA PaCa2	D14_4	0.01	1_D14_4_100	S	79	59	590	9.83333	61.7016	61.7016	63.4249	0.97283
1	MIA PaCa2	D14_4	0.01	1_D14_4_100	S	80	60	600	10	63.7373	63.7373	63.1512	1.00928
1	MIA PaCa2	D14_4	0.01	1_D14_4_100	S	81	61	610	10.1667	62.7656	62.7656	63.2666	0.992081
1	MIA PaCa2	D14_4	0.01	1_D14_4_100	S	82	62	620	10.3333	61.8735	61.8735	62.8471	0.984508
1	MIA PaCa2	D14_4	0.01	1_D14_4_100	S	83	63	630	10.5	61.4444	61.4444	62.9485	0.976105
1	MIA PaCa2	D14_4	0.01	1_D14_4_100	S	84	64	640	10.6667	61.5079	61.5079	63.5908	0.967246
1	MIA PaCa2	D14_4	0.01	1_D14_4_100	S	85	65	650	10.8333	60.5147	60.5147	63.0209	0.960232
1	MIA PaCa2	D14_4	0.01	1_D14_4_100	S	86	66	660	11	61.7549	61.7549	63.2933	0.975694
1	MIA PaCa2	D14_4	0.01	1_D14_4_100	S	87	67	670	11.1667	60.6763	60.6763	61.9681	0.979154
1	MIA PaCa2	D14_4	0.01	1_D14_4_100	S	88	68	680	11.3333	61.1953	61.1953	61.0898	1.00173
1	MIA PaCa2	D14_4	0.01	1_D14_4_100	S	89	69	690	11.5	64.9378	64.9378	61.5941	1.05429
1	MIA PaCa2	D14_4	0.01	1_D14_4_102	S	10	-10	-100	-1.66667	86.5191	86.5191	88.0257	0.982885
1	MIA PaCa2	D14_4	0.01	1_D14_4_102	S	11	-9	-90	-1.5	84.0145	84.0145	87.39	0.961374
1	MIA PaCa2	D14_4	0.01	1_D14_4_102	S	12	-8	-80	-1.33333	83.6014	83.6014	86.2825	0.968926
1	MIA PaCa2	D14_4	0.01	1_D14_4_102	S	13	-7	-70	-1.16667	82.9461	82.9461	84.872	0.977308
1	MIA PaCa2	D14_4	0.01	1_D14_4_102	S	14	-6	-60	-1	82.2138	82.2138	85.6506	0.959874
1	MIA PaCa2	D14_4	0.01	1_D14_4_102	S	15	-5	-50	-0.833333	85.8962	85.8962	84.1405	1.02087
1	MIA PaCa2	D14_4	0.01	1_D14_4_102	S	16	-4	-40	-0.666667	84.8901	84.8901	82.5286	1.02861
1	MIA PaCa2	D14_4	0.01	1_D14_4_102	S	17	-3	-30	-0.5	84.9662	84.9662	83.098	1.02248
1	MIA PaCa2	D14_4	0.01	1_D14_4_102	S	18	-2	-20	-0.333333	81.9065	81.9065	82.7797	0.989451
1	MIA PaCa2	D14_4	0.01	1_D14_4_102	S	19	-1	-10	-0.166667	79.2048	79.2048	82.0129	0.96576
1	MIA PaCa2	D14_4	0.01	1_D14_4_102	S	20	0	0	0	78.5935	78.5935	81.1847	0.968082
1	MIA PaCa2	D14_4	0.01	1_D14_4_102	S	21	1	10	0.166667	82.7179	82.7179	84.5183	0.978698
1	MIA PaCa2	D14_4	0.01	1_D14_4_102	S	22	2	20	0.333333	84.686	84.686	82.9015	1.02153
1	MIA PaCa2	D14_4	0.01	1_D14_4_102	S	23	3	30	0.5	85.4714	85.4714	82.0655	1.0415
1	MIA PaCa2	D14_4	0.01	1_D14_4_102	S	24	4	40	0.666667	87.7211	87.7211	80.9707	1.08337
1	MIA PaCa2	D14_4	0.01	1_D14_4_102	S	25	5	50	0.833333	92.1254	92.1254	80.691	1.14171
1	MIA PaCa2	D14_4	0.01	1_D14_4_102	S	26	6	60	1	91.8932	91.8932	79.6097	1.1543
1	MIA PaCa2	D14_4	0.01	1_D14_4_102	S	27	7	70	1.16667	90.3322	90.3322	79.1117	1.14183
1	MIA PaCa2	D14_4	0.01	1_D14_4_102	S	28	8	80	1.33333	88.6458	88.6458	78.0016	1.13646
1	MIA PaCa2	D14_4	0.01	1_D14_4_102	S	29	9	90	1.5	88.2109	88.2109	77.8528	1.13305
1	MIA PaCa2	D14_4	0.01	1_D14_4_102	S	30	10	100	1.66667	83.9725	83.9725	77.6698	1.08115
1	MIA PaCa2	D14_4	0.01	1_D14_4_102	S	31	11	110	1.83333	83.7933	83.7933	77.1169	1.08657
1	MIA PaCa2	D14_4	0.01	1_D14_4_102	S	32	12	120	2	84.7756	84.7756	76.7701	1.10428
1	MIA PaCa2	D14_4	0.01	1_D14_4_102	S	33	13	130	2.16667	88.8511	88.8511	75.9843	1.16933
1	MIA PaCa2	D14_4	0.01	1_D14_4_102	S	34	14	140	2.33333	87.7067	87.7067	75.0842	1.16811
1	MIA PaCa2	D14_4	0.01	1_D14_4_102	S	35	15	150	2.5	88.2685	88.2685	75.707	1.16592
1	MIA PaCa2	D14_4	0.01	1_D14_4_102	S	36	16	160	2.66667	89.0974	89.0974	74.2775	1.19952
1	MIA PaCa2	D14_4	0.01	1_D14_4_102	S	37	17	170	2.83333	86.4914	86.4914	73.2738	1.18039
1	MIA PaCa2	D14_4	0.01	1_D14_4_102	S	38	18	180	3	88.4235	88.4235	73.1743	1.2084
1	MIA PaCa2	D14_4	0.01	1_D14_4_102	S	39	19	190	3.16667	85.472	85.472	72.5019	1.17889
1	MIA PaCa2	D14_4	0.01	1_D14_4_102	S	40	20	200	3.33333	86.4934	86.4934	71.7669	1.2052
1	MIA PaCa2	D14_4	0.01	1_D14_4_102	S	41	21	210	3.5	87.1672	87.1672	72.0161	1.21038
1	MIA PaCa2	D14_4	0.01	1_D14_4_102	S	42	22	220	3.66667	89.5153	89.5153	71.8185	1.24641
1	MIA PaCa2	D14_4	0.01	1_D14_4_102	S	43	23	230	3.83333	85.0712	85.0712	71.1314	1.19597
1	MIA PaCa2	D14_4	0.01	1_D14_4_102	S	44	24	240	4	85.9067	85.9067	70.5922	1.21694
1	MIA PaCa2	D14_4	0.01	1_D14_4_102	S	45	25	250	4.16667	82.1222	82.1222	70.3088	1.16802
1	MIA PaCa2	D14_4	0.01	1_D14_4_102	S	46	26	260	4.33333	84.0745	84.0745	70.5953	1.19094
1	MIA PaCa2	D14_4	0.01	1_D14_4_102	S	47	27	270	4.5	84.8865	84.8865	70.0862	1.21117
1	MIA PaCa2	D14_4	0.01	1_D14_4_102	S	48	28	280	4.66667	80.819	80.819	69.4746	1.16329
1	MIA PaCa2	D14_4	0.01	1_D14_4_102	S	49	29	290	4.83333	81.1601	81.1601	68.6304	1.18257
1	MIA PaCa2	D14_4	0.01	1_D14_4_102	S	50	30	300	5	82.255	82.255	68.8548	1.19461
1	MIA PaCa2	D14_4	0.01	1_D14_4_102	S	51	31	310	5.16667	80.6799	80.6799	68.1679	1.18355
1	MIA PaCa2	D14_4	0.01	1_D14_4_102	S	52	32	320	5.33333	75.2345	75.2345	67.3507	1.11706
1	MIA PaCa2	D14_4	0.01	1_D14_4_102	S	53	33	330	5.5	75.6006	75.6006	67.9219	1.11305
1	MIA PaCa2	D14_4	0.01	1_D14_4_102	S	54	34	340	5.66667	75.6983	75.6983	68.0349	1.11264
1	MIA PaCa2	D14_4	0.01	1_D14_4_102	S	55	35	350	5.83333	76.1763	76.1763	68.887	1.10581
1	MIA PaCa2	D14_4	0.01	1_D14_4_102	S	56	36	360	6	76.8607	76.8607	68.1633	1.1276
1	MIA PaCa2	D14_4	0.01	1_D14_4_102	S	57	37	370	6.16667	75.3118	75.3118	67.2471	1.11993
1	MIA PaCa2	D14_4	0.01	1_D14_4_102	S	58	38	380	6.33333	76.1685	76.1685	67.1163	1.13487
1	MIA PaCa2	D14_4	0.01	1_D14_4_102	S	59	39	390	6.5	75.5969	75.5969	66.9979	1.12835
1	MIA PaCa2	D14_4	0.01	1_D14_4_102	S	60	40	400	6.66667	78.2928	78.2928	66.8466	1.17123
1	MIA PaCa2	D14_4	0.01	1_D14_4_102	S	61	41	410	6.83333	74.4316	74.4316	66.872	1.11305
1	MIA PaCa2	D14_4	0.01	1_D14_4_102	S	62	42	420	7	75.9515	75.9515	67.4151	1.12662
1	MIA PaCa2	D14_4	0.01	1_D14_4_102	S	63	43	430	7.16667	75.0321	75.0321	66.593	1.12673
1	MIA PaCa2	D14_4	0.01	1_D14_4_102	S	64	44	440	7.33333	72.6183	72.6183	64.9413	1.11821
1	MIA PaCa2	D14_4	0.01	1_D14_4_102	S	65	45	450	7.5	73.0583	73.0583	65.8821	1.10892
1	MIA PaCa2	D14_4	0.01	1_D14_4_102	S	66	46	460	7.66667	70.5441	70.5441	65.7717	1.07256
1	MIA PaCa2	D14_4	0.01	1_D14_4_102	S	67	47	470	7.83333	71.9639	71.9639	65.9693	1.09087
1	MIA PaCa2	D14_4	0.01	1_D14_4_102	S	68	48	480	8	72.0136	72.0136	65.2461	1.10372
1	MIA PaCa2	D14_4	0.01	1_D14_4_102	S	69	49	490	8.16667	71.1913	71.1913	64.9541	1.09602
1	MIA PaCa2	D14_4	0.01	1_D14_4_102	S	70	50	500	8.33333	71.867	71.867	64.7238	1.11036
1	MIA PaCa2	D14_4	0.01	1_D14_4_102	S	71	51	510	8.5	72.226	72.226	64.8745	1.11332
1	MIA PaCa2	D14_4	0.01	1_D14_4_102	S	72	52	520	8.66667	71.6314	71.6314	65.0075	1.10189
1	MIA PaCa2	D14_4	0.01	1_D14_4_102	S	73	53	530	8.83333	73.3179	73.3179	64.3036	1.14018
1	MIA PaCa2	D14_4	0.01	1_D14_4_102	S	74	54	540	9	75.0645	75.0645	64.0165	1.17258
1	MIA PaCa2	D14_4	0.01	1_D14_4_102	S	75	55	550	9.16667	72.2338	72.2338	64.712	1.11624
1	MIA PaCa2	D14_4	0.01	1_D14_4_102	S	76	56	560	9.33333	72.2069	72.2069	64.0422	1.12749
1	MIA PaCa2	D14_4	0.01	1_D14_4_102	S	77	57	570	9.5	71.3243	71.3243	63.8764	1.1166
1	MIA PaCa2	D14_4	0.01	1_D14_4_102	S	78	58	580	9.66667	70.5266	70.5266	63.7423	1.10643
1	MIA PaCa2	D14_4	0.01	1_D14_4_102	S	79	59	590	9.83333	72.0222	72.0222	63.4249	1.13555
1	MIA PaCa2	D14_4	0.01	1_D14_4_102	S	80	60	600	10	71.4821	71.4821	63.1512	1.13192
1	MIA PaCa2	D14_4	0.01	1_D14_4_102	S	81	61	610	10.1667	69.8899	69.8899	63.2666	1.10469
1	MIA PaCa2	D14_4	0.01	1_D14_4_102	S	82	62	620	10.3333	68.3661	68.3661	62.8471	1.08782
1	MIA PaCa2	D14_4	0.01	1_D14_4_102	S	83	63	630	10.5	70.2971	70.2971	62.9485	1.11674
1	MIA PaCa2	D14_4	0.01	1_D14_4_102	S	84	64	640	10.6667	70.3571	70.3571	63.5908	1.1064
1	MIA PaCa2	D14_4	0.01	1_D14_4_102	S	85	65	650	10.8333	71.3267	71.3267	63.0209	1.13179
1	MIA PaCa2	D14_4	0.01	1_D14_4_102	S	86	66	660	11	70.6147	70.6147	63.2933	1.11567
1	MIA PaCa2	D14_4	0.01	1_D14_4_102	S	87	67	670	11.1667	69.4196	69.4196	61.9681	1.12025
1	MIA PaCa2	D14_4	0.01	1_D14_4_102	S	88	68	680	11.3333	68.0521	68.0521	61.0898	1.11397
1	MIA PaCa2	D14_4	0.01	1_D14_4_102	S	89	69	690	11.5	66.2643	66.2643	61.5941	1.07582
1	MIA PaCa2	D14_4	0.01	1_D14_4_102	S	90	70	700	11.6667	68.8377	68.8377	62.8735	1.09486
1	MIA PaCa2	D14_4	0.01	1_D14_4_102	S	91	71	710	11.8333	66.4198	66.4198	61.5615	1.07892
1	MIA PaCa2	D14_4	0.01	1_D14_4_102	S	92	72	720	12	63.7151	63.7151	60.7859	1.04819
1	MIA PaCa2	D14_4	0.01	1_D14_4_102	S	93	73	730	12.1667	65.7896	65.7896	60.8609	1.08098
1	MIA PaCa2	D14_4	0.01	1_D14_4_102	S	94	74	740	12.3333	65.6503	65.6503	60.9904	1.0764
1	MIA PaCa2	D14_4	0.01	1_D14_4_102	S	95	75	750	12.5	66.7062	66.7062	61.556	1.08367
1	MIA PaCa2	D14_4	0.01	1_D14_4_104	S	11	-9	-90	-1.5	91.3592	91.3592	87.39	1.04542
1	MIA PaCa2	D14_4	0.01	1_D14_4_104	S	12	-8	-80	-1.33333	91.5287	91.5287	86.2825	1.0608
1	MIA PaCa2	D14_4	0.01	1_D14_4_104	S	13	-7	-70	-1.16667	85.3556	85.3556	84.872	1.0057
1	MIA PaCa2	D14_4	0.01	1_D14_4_104	S	14	-6	-60	-1	89.0571	89.0571	85.6506	1.03977
1	MIA PaCa2	D14_4	0.01	1_D14_4_104	S	15	-5	-50	-0.833333	89.8545	89.8545	84.1405	1.06791
1	MIA PaCa2	D14_4	0.01	1_D14_4_104	S	16	-4	-40	-0.666667	88.2448	88.2448	82.5286	1.06926
1	MIA PaCa2	D14_4	0.01	1_D14_4_104	S	17	-3	-30	-0.5	88.2059	88.2059	83.098	1.06147
1	MIA PaCa2	D14_4	0.01	1_D14_4_104	S	18	-2	-20	-0.333333	85.6908	85.6908	82.7797	1.03517
1	MIA PaCa2	D14_4	0.01	1_D14_4_104	S	19	-1	-10	-0.166667	87.6053	87.6053	82.0129	1.06819
1	MIA PaCa2	D14_4	0.01	1_D14_4_104	S	20	0	0	0	90.6799	90.6799	81.1847	1.11696
1	MIA PaCa2	D14_4	0.01	1_D14_4_104	S	21	1	10	0.166667	91.9164	91.9164	84.5183	1.08753
1	MIA PaCa2	D14_4	0.01	1_D14_4_104	S	22	2	20	0.333333	92.1351	92.1351	82.9015	1.11138
1	MIA PaCa2	D14_4	0.01	1_D14_4_104	S	23	3	30	0.5	90.3352	90.3352	82.0655	1.10077
1	MIA PaCa2	D14_4	0.01	1_D14_4_104	S	24	4	40	0.666667	86.6773	86.6773	80.9707	1.07048
1	MIA PaCa2	D14_4	0.01	1_D14_4_104	S	25	5	50	0.833333	89.2888	89.2888	80.691	1.10655
1	MIA PaCa2	D14_4	0.01	1_D14_4_104	S	26	6	60	1	86.0943	86.0943	79.6097	1.08146
1	MIA PaCa2	D14_4	0.01	1_D14_4_104	S	27	7	70	1.16667	86.6783	86.6783	79.1117	1.09565
1	MIA PaCa2	D14_4	0.01	1_D14_4_104	S	28	8	80	1.33333	86.4743	86.4743	78.0016	1.10862
1	MIA PaCa2	D14_4	0.01	1_D14_4_104	S	29	9	90	1.5	84.7224	84.7224	77.8528	1.08824
1	MIA PaCa2	D14_4	0.01	1_D14_4_104	S	30	10	100	1.66667	83.526	83.526	77.6698	1.0754
1	MIA PaCa2	D14_4	0.01	1_D14_4_104	S	31	11	110	1.83333	84.5608	84.5608	77.1169	1.09653
1	MIA PaCa2	D14_4	0.01	1_D14_4_104	S	32	12	120	2	84.775	84.775	76.7701	1.10427
1	MIA PaCa2	D14_4	0.01	1_D14_4_104	S	33	13	130	2.16667	83.703	83.703	75.9843	1.10158
1	MIA PaCa2	D14_4	0.01	1_D14_4_104	S	34	14	140	2.33333	84.7923	84.7923	75.0842	1.1293
1	MIA PaCa2	D14_4	0.01	1_D14_4_104	S	35	15	150	2.5	82.512	82.512	75.707	1.08989
1	MIA PaCa2	D14_4	0.01	1_D14_4_104	S	36	16	160	2.66667	81.9258	81.9258	74.2775	1.10297
1	MIA PaCa2	D14_4	0.01	1_D14_4_104	S	37	17	170	2.83333	78.4248	78.4248	73.2738	1.0703
1	MIA PaCa2	D14_4	0.01	1_D14_4_104	S	38	18	180	3	81.4365	81.4365	73.1743	1.11291
1	MIA PaCa2	D14_4	0.01	1_D14_4_104	S	39	19	190	3.16667	79.7624	79.7624	72.5019	1.10014
1	MIA PaCa2	D14_4	0.01	1_D14_4_104	S	40	20	200	3.33333	78.7492	78.7492	71.7669	1.09729
1	MIA PaCa2	D14_4	0.01	1_D14_4_104	S	41	21	210	3.5	84.1318	84.1318	72.0161	1.16824
1	MIA PaCa2	D14_4	0.01	1_D14_4_104	S	42	22	220	3.66667	81.9185	81.9185	71.8185	1.14063
1	MIA PaCa2	D14_4	0.01	1_D14_4_104	S	43	23	230	3.83333	81.5465	81.5465	71.1314	1.14642
1	MIA PaCa2	D14_4	0.01	1_D14_4_104	S	44	24	240	4	83.1307	83.1307	70.5922	1.17762
1	MIA PaCa2	D14_4	0.01	1_D14_4_104	S	45	25	250	4.16667	81.8886	81.8886	70.3088	1.1647
1	MIA PaCa2	D14_4	0.01	1_D14_4_104	S	46	26	260	4.33333	82.1515	82.1515	70.5953	1.1637
1	MIA PaCa2	D14_4	0.01	1_D14_4_104	S	47	27	270	4.5	76.4939	76.4939	70.0862	1.09143
1	MIA PaCa2	D14_4	0.01	1_D14_4_104	S	48	28	280	4.66667	77.7951	77.7951	69.4746	1.11976
1	MIA PaCa2	D14_4	0.01	1_D14_4_104	S	49	29	290	4.83333	77.7844	77.7844	68.6304	1.13338
1	MIA PaCa2	D14_4	0.01	1_D14_4_104	S	50	30	300	5	73.9527	73.9527	68.8548	1.07404
1	MIA PaCa2	D14_4	0.01	1_D14_4_104	S	51	31	310	5.16667	74.4393	74.4393	68.1679	1.092
1	MIA PaCa2	D14_4	0.01	1_D14_4_104	S	52	32	320	5.33333	74.0854	74.0854	67.3507	1.09999
1	MIA PaCa2	D14_4	0.01	1_D14_4_104	S	53	33	330	5.5	75.4367	75.4367	67.9219	1.11064
1	MIA PaCa2	D14_4	0.01	1_D14_4_104	S	54	34	340	5.66667	76.1843	76.1843	68.0349	1.11978
1	MIA PaCa2	D14_4	0.01	1_D14_4_104	S	55	35	350	5.83333	76.4448	76.4448	68.887	1.10971
1	MIA PaCa2	D14_4	0.01	1_D14_4_104	S	56	36	360	6	80.3596	80.3596	68.1633	1.17893
1	MIA PaCa2	D14_4	0.01	1_D14_4_104	S	57	37	370	6.16667	75.0847	75.0847	67.2471	1.11655
1	MIA PaCa2	D14_4	0.01	1_D14_4_104	S	58	38	380	6.33333	75.7221	75.7221	67.1163	1.12822
1	MIA PaCa2	D14_4	0.01	1_D14_4_104	S	59	39	390	6.5	78.3577	78.3577	66.9979	1.16956
1	MIA PaCa2	D14_4	0.01	1_D14_4_104	S	60	40	400	6.66667	77.5711	77.5711	66.8466	1.16043
1	MIA PaCa2	D14_4	0.01	1_D14_4_104	S	61	41	410	6.83333	82.716	82.716	66.872	1.23693
1	MIA PaCa2	D14_4	0.01	1_D14_4_106	G1	15	-5	-50	-0.833333	92.1415	92.1415	84.1405	1.09509
1	MIA PaCa2	D14_4	0.01	1_D14_4_106	G1	16	-4	-40	-0.666667	92.0714	92.0714	82.5286	1.11563
1	MIA PaCa2	D14_4	0.01	1_D14_4_106	G1	17	-3	-30	-0.5	83.6465	83.6465	83.098	1.0066
1	MIA PaCa2	D14_4	0.01	1_D14_4_106	G1	18	-2	-20	-0.333333	82.5	82.5	82.7797	0.996621
1	MIA PaCa2	D14_4	0.01	1_D14_4_106	G1	19	-1	-10	-0.166667	80.9505	80.9505	82.0129	0.987046
1	MIA PaCa2	D14_4	0.01	1_D14_4_106	G1	20	0	0	0	82.6441	82.6441	81.1847	1.01798
1	MIA PaCa2	D14_4	0.01	1_D14_4_106	G1	21	1	10	0.166667	82.7048	82.7048	84.5183	0.978543
1	MIA PaCa2	D14_4	0.01	1_D14_4_106	G1	22	2	20	0.333333	85.2809	85.2809	82.9015	1.0287
1	MIA PaCa2	D14_4	0.01	1_D14_4_106	G1	23	3	30	0.5	85.5432	85.5432	82.0655	1.04238
1	MIA PaCa2	D14_4	0.01	1_D14_4_106	G1	24	4	40	0.666667	86.4465	86.4465	80.9707	1.06763
1	MIA PaCa2	D14_4	0.01	1_D14_4_106	G1	25	5	50	0.833333	87.304	87.304	80.691	1.08196
1	MIA PaCa2	D14_4	0.01	1_D14_4_106	G1	26	6	60	1	84.9722	84.9722	79.6097	1.06736
1	MIA PaCa2	D14_4	0.01	1_D14_4_106	G1	27	7	70	1.16667	84.0122	84.0122	79.1117	1.06194
1	MIA PaCa2	D14_4	0.01	1_D14_4_106	G1	28	8	80	1.33333	77.4703	77.4703	78.0016	0.993189
1	MIA PaCa2	D14_4	0.01	1_D14_4_106	G1	29	9	90	1.5	77.9578	77.9578	77.8528	1.00135
1	MIA PaCa2	D14_4	0.01	1_D14_4_106	G1	30	10	100	1.66667	77.6694	77.6694	77.6698	0.999994
1	MIA PaCa2	D14_4	0.01	1_D14_4_106	G1	31	11	110	1.83333	75.8393	75.8393	77.1169	0.983432
1	MIA PaCa2	D14_4	0.01	1_D14_4_106	G1	33	13	130	2.16667	76.3383	76.3383	75.9843	1.00466
1	MIA PaCa2	D14_4	0.01	1_D14_4_106	G1	34	14	140	2.33333	80.6744	80.6744	75.0842	1.07445
1	MIA PaCa2	D14_4	0.01	1_D14_4_106	G1	35	15	150	2.5	77.7581	77.7581	75.707	1.02709
1	MIA PaCa2	D14_4	0.01	1_D14_4_106	G1	36	16	160	2.66667	81.0683	81.0683	74.2775	1.09142
1	MIA PaCa2	D14_4	0.01	1_D14_4_106	G1	37	17	170	2.83333	75.5447	75.5447	73.2738	1.03099
1	MIA PaCa2	D14_4	0.01	1_D14_4_106	G1	38	18	180	3	74.1049	74.1049	73.1743	1.01272
1	MIA PaCa2	D14_4	0.01	1_D14_4_106	G1	39	19	190	3.16667	76.4947	76.4947	72.5019	1.05507
1	MIA PaCa2	D14_4	0.01	1_D14_4_106	G1	40	20	200	3.33333	72.8859	72.8859	71.7669	1.01559
1	MIA PaCa2	D14_4	0.01	1_D14_4_106	G1	41	21	210	3.5	73.9739	73.9739	72.0161	1.02719
1	MIA PaCa2	D14_4	0.01	1_D14_4_106	G1	42	22	220	3.66667	72.171	72.171	71.8185	1.00491
1	MIA PaCa2	D14_4	0.01	1_D14_4_106	G1	43	23	230	3.83333	71.6465	71.6465	71.1314	1.00724
1	MIA PaCa2	D14_4	0.01	1_D14_4_106	G1	44	24	240	4	71.5126	71.5126	70.5922	1.01304
1	MIA PaCa2	D14_4	0.01	1_D14_4_106	G1	45	25	250	4.16667	69.8095	69.8095	70.3088	0.992898
1	MIA PaCa2	D14_4	0.01	1_D14_4_106	G1	46	26	260	4.33333	69.7703	69.7703	70.5953	0.988314
1	MIA PaCa2	D14_4	0.01	1_D14_4_106	G1	47	27	270	4.5	69.95	69.95	70.0862	0.998057
1	MIA PaCa2	D14_4	0.01	1_D14_4_106	G1	48	28	280	4.66667	71.0511	71.0511	69.4746	1.02269
1	MIA PaCa2	D14_4	0.01	1_D14_4_106	G1	49	29	290	4.83333	72.5213	72.5213	68.6304	1.05669
1	MIA PaCa2	D14_4	0.01	1_D14_4_106	G1	50	30	300	5	70.4709	70.4709	68.8548	1.02347
1	MIA PaCa2	D14_4	0.01	1_D14_4_106	G1	51	31	310	5.16667	67.2553	67.2553	68.1679	0.986613
1	MIA PaCa2	D14_4	0.01	1_D14_4_106	G1	52	32	320	5.33333	67.2783	67.2783	67.3507	0.998925
1	MIA PaCa2	D14_4	0.01	1_D14_4_106	G1	53	33	330	5.5	68.3006	68.3006	67.9219	1.00557
1	MIA PaCa2	D14_4	0.01	1_D14_4_106	G1	54	34	340	5.66667	70.2579	70.2579	68.0349	1.03267
1	MIA PaCa2	D14_4	0.01	1_D14_4_106	G1	55	35	350	5.83333	73.3404	73.3404	68.887	1.06465
1	MIA PaCa2	D14_4	0.01	1_D14_4_106	G1	56	36	360	6	72.0857	72.0857	68.1633	1.05754
1	MIA PaCa2	D14_4	0.01	1_D14_4_106	G1	57	37	370	6.16667	68.0204	68.0204	67.2471	1.0115
1	MIA PaCa2	D14_4	0.01	1_D14_4_106	G1	58	38	380	6.33333	69.6649	69.6649	67.1163	1.03797
1	MIA PaCa2	D14_4	0.01	1_D14_4_106	G1	59	39	390	6.5	67.558	67.558	66.9979	1.00836
1	MIA PaCa2	D14_4	0.01	1_D14_4_106	G1	60	40	400	6.66667	66.9167	66.9167	66.8466	1.00105
1	MIA PaCa2	D14_4	0.01	1_D14_4_106	G1	61	41	410	6.83333	67.8082	67.8082	66.872	1.014
1	MIA PaCa2	D14_4	0.01	1_D14_4_106	G1	62	42	420	7	68.3844	68.3844	67.4151	1.01438
1	MIA PaCa2	D14_4	0.01	1_D14_4_106	G1	63	43	430	7.16667	67.0617	67.0617	66.593	1.00704
1	MIA PaCa2	D14_4	0.01	1_D14_4_106	G1	64	44	440	7.33333	64.8709	64.8709	64.9413	0.998916
1	MIA PaCa2	D14_4	0.01	1_D14_4_106	G1	65	45	450	7.5	67.9035	67.9035	65.8821	1.03068
1	MIA PaCa2	D14_4	0.01	1_D14_4_106	G1	66	46	460	7.66667	67.3508	67.3508	65.7717	1.02401
1	MIA PaCa2	D14_4	0.01	1_D14_4_106	G1	67	47	470	7.83333	67.7163	67.7163	65.9693	1.02648
1	MIA PaCa2	D14_4	0.01	1_D14_4_106	G1	68	48	480	8	70.7286	70.7286	65.2461	1.08403
1	MIA PaCa2	D14_4	0.01	1_D14_4_106	G1	69	49	490	8.16667	70.2975	70.2975	64.9541	1.08226
1	MIA PaCa2	D14_4	0.01	1_D14_4_106	G1	70	50	500	8.33333	68.2092	68.2092	64.7238	1.05385
1	MIA PaCa2	D14_4	0.01	1_D14_4_106	G1	71	51	510	8.5	69.987	69.987	64.8745	1.07881
1	MIA PaCa2	D14_4	0.01	1_D14_4_106	G1	72	52	520	8.66667	68.8451	68.8451	65.0075	1.05903
1	MIA PaCa2	D14_4	0.01	1_D14_4_106	G1	73	53	530	8.83333	69.1319	69.1319	64.3036	1.07509
1	MIA PaCa2	D14_4	0.01	1_D14_4_106	G1	74	54	540	9	71.5734	71.5734	64.0165	1.11805
1	MIA PaCa2	D14_4	0.01	1_D14_4_106	G1	75	55	550	9.16667	66.1264	66.1264	64.712	1.02186
1	MIA PaCa2	D14_4	0.01	1_D14_4_106	G1	76	56	560	9.33333	66.0735	66.0735	64.0422	1.03172
1	MIA PaCa2	D14_4	0.01	1_D14_4_106	G1	77	57	570	9.5	66.6105	66.6105	63.8764	1.0428
1	MIA PaCa2	D14_4	0.01	1_D14_4_106	G1	78	58	580	9.66667	65.3499	65.3499	63.7423	1.02522
1	MIA PaCa2	D14_4	0.01	1_D14_4_106	G1	79	59	590	9.83333	64.3352	64.3352	63.4249	1.01435
1	MIA PaCa2	D14_4	0.01	1_D14_4_106	G1	80	60	600	10	64.0455	64.0455	63.1512	1.01416
1	MIA PaCa2	D14_4	0.01	1_D14_4_106	G1	81	61	610	10.1667	67.0833	67.0833	63.2666	1.06033
1	MIA PaCa2	D14_4	0.01	1_D14_4_106	G1	82	62	620	10.3333	67.5199	67.5199	62.8471	1.07435
1	MIA PaCa2	D14_4	0.01	1_D14_4_106	G1	83	63	630	10.5	64.8044	64.8044	62.9485	1.02948
1	MIA PaCa2	D14_4	0.01	1_D14_4_106	G1	84	64	640	10.6667	64.913	64.913	63.5908	1.02079
1	MIA PaCa2	D14_4	0.01	1_D14_4_106	G1	85	65	650	10.8333	64.9451	64.9451	63.0209	1.03053
1	MIA PaCa2	D14_4	0.01	1_D14_4_106	G1	86	66	660	11	65.0344	65.0344	63.2933	1.02751
1	MIA PaCa2	D14_4	0.01	1_D14_4_106	G1	87	67	670	11.1667	62.5489	62.5489	61.9681	1.00937
1	MIA PaCa2	D14_4	0.01	1_D14_4_106	G1	88	68	680	11.3333	61.4659	61.4659	61.0898	1.00616
1	MIA PaCa2	D14_4	0.01	1_D14_4_106	G1	89	69	690	11.5	62.9623	62.9623	61.5941	1.02221
1	MIA PaCa2	D14_4	0.01	1_D14_4_106	G1	90	70	700	11.6667	66.6889	66.6889	62.8735	1.06068
1	MIA PaCa2	D14_4	0.01	1_D14_4_106	G1	91	71	710	11.8333	66.9884	66.9884	61.5615	1.08815
1	MIA PaCa2	D14_4	0.01	1_D14_4_106	G1	92	72	720	12	66.0551	66.0551	60.7859	1.08668
1	MIA PaCa2	D14_4	0.01	1_D14_4_106	G1	93	73	730	12.1667	67.1354	67.1354	60.8609	1.1031
1	MIA PaCa2	D14_4	0.01	1_D14_4_106	G1	94	74	740	12.3333	66.346	66.346	60.9904	1.08781
1	MIA PaCa2	D14_4	0.01	1_D14_4_106	G1	95	75	750	12.5	66.9728	66.9728	61.556	1.088
1	MIA PaCa2	D14_4	0.01	1_D14_4_106	G1	96	76	760	12.6667	66.3139	66.3139	61.3403	1.08108
1	MIA PaCa2	D14_4	0.01	1_D14_4_106	G1	97	77	770	12.8333	69.7679	69.7679	61.6391	1.13188
1	MIA PaCa2	D14_4	0.01	1_D14_4_106	G1	98	78	780	13	65.0056	65.0056	60.4758	1.0749
1	MIA PaCa2	D14_4	0.01	1_D14_4_106	G1	99	79	790	13.1667	60.9597	60.9597	60.3963	1.00933
1	MIA PaCa2	D14_4	0.01	1_D14_4_106	G1	100	80	800	13.3333	65.0507	65.0507	60.7884	1.07012
1	MIA PaCa2	D14_4	0.01	1_D14_4_106	G1	101	81	810	13.5	73.2864	73.2864	60.3059	1.21524
1	MIA PaCa2	D14_4	0.01	1_D14_4_15	G2	1	-19	-190	-3.16667	112.337	112.337	98.9025	1.13583
1	MIA PaCa2	D14_4	0.01	1_D14_4_15	G2	2	-18	-180	-3	110.731	110.731	98.287	1.1266
1	MIA PaCa2	D14_4	0.01	1_D14_4_15	G2	3	-17	-170	-2.83333	107.306	107.306	95.5639	1.12287
1	MIA PaCa2	D14_4	0.01	1_D14_4_15	G2	4	-16	-160	-2.66667	105.751	105.751	94.8279	1.11519
1	MIA PaCa2	D14_4	0.01	1_D14_4_15	G2	5	-15	-150	-2.5	99.1489	99.1489	93.7282	1.05783
1	MIA PaCa2	D14_4	0.01	1_D14_4_15	G2	6	-14	-140	-2.33333	99.0689	99.0689	91.2043	1.08623
1	MIA PaCa2	D14_4	0.01	1_D14_4_15	G2	7	-13	-130	-2.16667	97.9548	97.9548	91.0398	1.07596
1	MIA PaCa2	D14_4	0.01	1_D14_4_15	G2	8	-12	-120	-2	97.4959	97.4959	89.9628	1.08374
1	MIA PaCa2	D14_4	0.01	1_D14_4_15	G2	9	-11	-110	-1.83333	100.489	100.489	88.8498	1.131
1	MIA PaCa2	D14_4	0.01	1_D14_4_15	G2	10	-10	-100	-1.66667	96.2992	96.2992	88.0257	1.09399
1	MIA PaCa2	D14_4	0.01	1_D14_4_15	G2	11	-9	-90	-1.5	96.2936	96.2936	87.39	1.10188
1	MIA PaCa2	D14_4	0.01	1_D14_4_15	G2	12	-8	-80	-1.33333	92.6027	92.6027	86.2825	1.07325
1	MIA PaCa2	D14_4	0.01	1_D14_4_15	G2	13	-7	-70	-1.16667	90.2893	90.2893	84.872	1.06383
1	MIA PaCa2	D14_4	0.01	1_D14_4_15	G2	14	-6	-60	-1	88.9143	88.9143	85.6506	1.0381
1	MIA PaCa2	D14_4	0.01	1_D14_4_15	G2	15	-5	-50	-0.833333	89.6324	89.6324	84.1405	1.06527
1	MIA PaCa2	D14_4	0.01	1_D14_4_15	G2	16	-4	-40	-0.666667	89.0193	89.0193	82.5286	1.07865
1	MIA PaCa2	D14_4	0.01	1_D14_4_15	G2	17	-3	-30	-0.5	90.4116	90.4116	83.098	1.08801
1	MIA PaCa2	D14_4	0.01	1_D14_4_15	G2	18	-2	-20	-0.333333	93.5496	93.5496	82.7797	1.1301
1	MIA PaCa2	D14_4	0.01	1_D14_4_15	G2	19	-1	-10	-0.166667	90.9153	90.9153	82.0129	1.10855
1	MIA PaCa2	D14_4	0.01	1_D14_4_15	G2	20	0	0	0	88.8889	88.8889	81.1847	1.0949
1	MIA PaCa2	D14_4	0.01	1_D14_4_15	G2	21	1	10	0.166667	93.2056	93.2056	84.5183	1.10279
1	MIA PaCa2	D14_4	0.01	1_D14_4_15	G2	22	2	20	0.333333	89.5714	89.5714	82.9015	1.08046
1	MIA PaCa2	D14_4	0.01	1_D14_4_15	G2	23	3	30	0.5	94.4555	94.4555	82.0655	1.15098
1	MIA PaCa2	D14_4	0.01	1_D14_4_15	G2	24	4	40	0.666667	90.8459	90.8459	80.9707	1.12196
1	MIA PaCa2	D14_4	0.01	1_D14_4_15	G2	25	5	50	0.833333	92.7353	92.7353	80.691	1.14926
1	MIA PaCa2	D14_4	0.01	1_D14_4_15	G2	26	6	60	1	89.8678	89.8678	79.6097	1.12886
1	MIA PaCa2	D14_4	0.01	1_D14_4_15	G2	27	7	70	1.16667	88.5363	88.5363	79.1117	1.11913
1	MIA PaCa2	D14_4	0.01	1_D14_4_15	G2	28	8	80	1.33333	89.5642	89.5642	78.0016	1.14824
1	MIA PaCa2	D14_4	0.01	1_D14_4_15	G2	29	9	90	1.5	92.6873	92.6873	77.8528	1.19055
1	MIA PaCa2	D14_4	0.01	1_D14_4_15	G2	30	10	100	1.66667	92.4372	92.4372	77.6698	1.19013
1	MIA PaCa2	D14_4	0.01	1_D14_4_15	G2	31	11	110	1.83333	93.8958	93.8958	77.1169	1.21758
1	MIA PaCa2	D14_4	0.01	1_D14_4_15	G2	32	12	120	2	88.5876	88.5876	76.7701	1.15393
1	MIA PaCa2	D14_4	0.01	1_D14_4_15	G2	33	13	130	2.16667	89.6244	89.6244	75.9843	1.17951
1	MIA PaCa2	D14_4	0.01	1_D14_4_15	G2	34	14	140	2.33333	96.3134	96.3134	75.0842	1.28274
1	MIA PaCa2	D14_4	0.01	1_D14_4_15	G2	35	15	150	2.5	90.2965	90.2965	75.707	1.19271
1	MIA PaCa2	D14_4	0.01	1_D14_4_15	G2	36	16	160	2.66667	92.1385	92.1385	74.2775	1.24046
1	MIA PaCa2	D14_4	0.01	1_D14_4_61	S	0	-20	-200	-3.33333	105.743	105.743	102.696	1.02967
1	MIA PaCa2	D14_4	0.01	1_D14_4_61	S	1	-19	-190	-3.16667	99.0897	99.0897	98.9025	1.00189
1	MIA PaCa2	D14_4	0.01	1_D14_4_61	S	2	-18	-180	-3	100.659	100.659	98.287	1.02414
1	MIA PaCa2	D14_4	0.01	1_D14_4_61	S	3	-17	-170	-2.83333	100.119	100.119	95.5639	1.04767
1	MIA PaCa2	D14_4	0.01	1_D14_4_61	S	4	-16	-160	-2.66667	96.1573	96.1573	94.8279	1.01402
1	MIA PaCa2	D14_4	0.01	1_D14_4_61	S	5	-15	-150	-2.5	98.4662	98.4662	93.7282	1.05055
1	MIA PaCa2	D14_4	0.01	1_D14_4_61	S	6	-14	-140	-2.33333	93.5777	93.5777	91.2043	1.02602
1	MIA PaCa2	D14_4	0.01	1_D14_4_61	S	7	-13	-130	-2.16667	91.5609	91.5609	91.0398	1.00572
1	MIA PaCa2	D14_4	0.01	1_D14_4_61	S	8	-12	-120	-2	88.648	88.648	89.9628	0.985385
1	MIA PaCa2	D14_4	0.01	1_D14_4_61	S	9	-11	-110	-1.83333	86.022	86.022	88.8498	0.968173
1	MIA PaCa2	D14_4	0.01	1_D14_4_61	S	10	-10	-100	-1.66667	86.8778	86.8778	88.0257	0.98696
1	MIA PaCa2	D14_4	0.01	1_D14_4_61	S	11	-9	-90	-1.5	85.3238	85.3238	87.39	0.976356
1	MIA PaCa2	D14_4	0.01	1_D14_4_61	S	12	-8	-80	-1.33333	86.6376	86.6376	86.2825	1.00412
1	MIA PaCa2	D14_4	0.01	1_D14_4_61	S	13	-7	-70	-1.16667	82.4952	82.4952	84.872	0.971995
1	MIA PaCa2	D14_4	0.01	1_D14_4_61	S	14	-6	-60	-1	81.1667	81.1667	85.6506	0.947649
1	MIA PaCa2	D14_4	0.01	1_D14_4_61	S	15	-5	-50	-0.833333	84.3	84.3	84.1405	1.0019
1	MIA PaCa2	D14_4	0.01	1_D14_4_61	S	16	-4	-40	-0.666667	81.7803	81.7803	82.5286	0.990933
1	MIA PaCa2	D14_4	0.01	1_D14_4_61	S	17	-3	-30	-0.5	84.5192	84.5192	83.098	1.0171
1	MIA PaCa2	D14_4	0.01	1_D14_4_61	S	18	-2	-20	-0.333333	84.4863	84.4863	82.7797	1.02062
1	MIA PaCa2	D14_4	0.01	1_D14_4_61	S	19	-1	-10	-0.166667	84.1558	84.1558	82.0129	1.02613
1	MIA PaCa2	D14_4	0.01	1_D14_4_61	S	20	0	0	0	84.4896	84.4896	81.1847	1.04071
1	MIA PaCa2	D14_4	0.01	1_D14_4_61	S	21	1	10	0.166667	83.3343	83.3343	84.5183	0.985991
1	MIA PaCa2	D14_4	0.01	1_D14_4_61	S	22	2	20	0.333333	84.3631	84.3631	82.9015	1.01763
1	MIA PaCa2	D14_4	0.01	1_D14_4_61	S	23	3	30	0.5	84.4111	84.4111	82.0655	1.02858
1	MIA PaCa2	D14_4	0.01	1_D14_4_61	S	24	4	40	0.666667	84.279	84.279	80.9707	1.04086
1	MIA PaCa2	D14_4	0.01	1_D14_4_61	S	25	5	50	0.833333	89.315	89.315	80.691	1.10688
1	MIA PaCa2	D14_4	0.01	1_D14_4_61	S	26	6	60	1	86.1162	86.1162	79.6097	1.08173
1	MIA PaCa2	D14_4	0.01	1_D14_4_61	S	27	7	70	1.16667	83.6703	83.6703	79.1117	1.05762
1	MIA PaCa2	D14_4	0.01	1_D14_4_61	S	28	8	80	1.33333	83.7358	83.7358	78.0016	1.07351
1	MIA PaCa2	D14_4	0.01	1_D14_4_61	S	29	9	90	1.5	85.5718	85.5718	77.8528	1.09915
1	MIA PaCa2	D14_4	0.01	1_D14_4_61	S	30	10	100	1.66667	83.7035	83.7035	77.6698	1.07768
1	MIA PaCa2	D14_4	0.01	1_D14_4_61	S	31	11	110	1.83333	82.4731	82.4731	77.1169	1.06946
1	MIA PaCa2	D14_4	0.01	1_D14_4_61	S	32	12	120	2	81.4578	81.4578	76.7701	1.06106
1	MIA PaCa2	D14_4	0.01	1_D14_4_61	S	33	13	130	2.16667	81.5676	81.5676	75.9843	1.07348
1	MIA PaCa2	D14_4	0.01	1_D14_4_61	S	34	14	140	2.33333	86.3385	86.3385	75.0842	1.14989
1	MIA PaCa2	D14_4	0.01	1_D14_4_61	S	35	15	150	2.5	82.496	82.496	75.707	1.08967
1	MIA PaCa2	D14_4	0.01	1_D14_4_61	S	36	16	160	2.66667	81.1054	81.1054	74.2775	1.09192
1	MIA PaCa2	D14_4	0.01	1_D14_4_61	S	37	17	170	2.83333	78.8112	78.8112	73.2738	1.07557
1	MIA PaCa2	D14_4	0.01	1_D14_4_61	S	38	18	180	3	79.7699	79.7699	73.1743	1.09014
1	MIA PaCa2	D14_4	0.01	1_D14_4_61	S	39	19	190	3.16667	76.0054	76.0054	72.5019	1.04832
1	MIA PaCa2	D14_4	0.01	1_D14_4_61	S	40	20	200	3.33333	75.7328	75.7328	71.7669	1.05526
1	MIA PaCa2	D14_4	0.01	1_D14_4_61	S	41	21	210	3.5	81.6075	81.6075	72.0161	1.13318
1	MIA PaCa2	D14_4	0.01	1_D14_4_61	S	42	22	220	3.66667	77.4645	77.4645	71.8185	1.07861
1	MIA PaCa2	D14_4	0.01	1_D14_4_61	S	43	23	230	3.83333	78.9328	78.9328	71.1314	1.10968
1	MIA PaCa2	D14_4	0.01	1_D14_4_61	S	44	24	240	4	78.5112	78.5112	70.5922	1.11218
1	MIA PaCa2	D14_4	0.01	1_D14_4_61	S	45	25	250	4.16667	76.3531	76.3531	70.3088	1.08597
1	MIA PaCa2	D14_4	0.01	1_D14_4_61	S	46	26	260	4.33333	74.9119	74.9119	70.5953	1.06115
1	MIA PaCa2	D14_4	0.01	1_D14_4_61	S	47	27	270	4.5	75.2188	75.2188	70.0862	1.07323
1	MIA PaCa2	D14_4	0.01	1_D14_4_61	S	48	28	280	4.66667	77.2383	77.2383	69.4746	1.11175
1	MIA PaCa2	D14_4	0.01	1_D14_4_61	S	49	29	290	4.83333	77.9015	77.9015	68.6304	1.13509
1	MIA PaCa2	D14_4	0.01	1_D14_4_61	S	50	30	300	5	75.6486	75.6486	68.8548	1.09867
1	MIA PaCa2	D14_4	0.01	1_D14_4_61	S	51	31	310	5.16667	73.4677	73.4677	68.1679	1.07775
1	MIA PaCa2	D14_4	0.01	1_D14_4_61	S	52	32	320	5.33333	73.3351	73.3351	67.3507	1.08885
1	MIA PaCa2	D14_4	0.01	1_D14_4_61	S	53	33	330	5.5	76.8282	76.8282	67.9219	1.13112
1	MIA PaCa2	D14_4	0.01	1_D14_4_61	S	54	34	340	5.66667	77.0506	77.0506	68.0349	1.13252
1	MIA PaCa2	D14_4	0.01	1_D14_4_61	S	55	35	350	5.83333	75.8668	75.8668	68.887	1.10132
1	MIA PaCa2	D14_4	0.01	1_D14_4_61	S	56	36	360	6	76.3759	76.3759	68.1633	1.12048
1	MIA PaCa2	D14_4	0.01	1_D14_4_61	S	57	37	370	6.16667	77.6862	77.6862	67.2471	1.15523
1	MIA PaCa2	D14_4	0.01	1_D14_4_61	S	58	38	380	6.33333	77.9225	77.9225	67.1163	1.16101
1	MIA PaCa2	D14_4	0.01	1_D14_4_61	S	59	39	390	6.5	73.7222	73.7222	66.9979	1.10037
1	MIA PaCa2	D14_4	0.01	1_D14_4_61	S	60	40	400	6.66667	76.5304	76.5304	66.8466	1.14487
1	MIA PaCa2	D14_4	0.01	1_D14_4_61	S	61	41	410	6.83333	76.5945	76.5945	66.872	1.14539
1	MIA PaCa2	D14_4	0.01	1_D14_4_61	S	62	42	420	7	77.7911	77.7911	67.4151	1.15391
1	MIA PaCa2	D14_4	0.01	1_D14_4_61	S	63	43	430	7.16667	77.8507	77.8507	66.593	1.16905
1	MIA PaCa2	D14_4	0.01	1_D14_4_61	S	64	44	440	7.33333	74.9588	74.9588	64.9413	1.15425
1	MIA PaCa2	D14_4	0.01	1_D14_4_61	S	65	45	450	7.5	78.5251	78.5251	65.8821	1.1919
1	MIA PaCa2	D14_4	0.01	1_D14_4_61	S	66	46	460	7.66667	81.4853	81.4853	65.7717	1.23891
1	MIA PaCa2	D14_4	0.01	1_D14_4_61	S	67	47	470	7.83333	81.8247	81.8247	65.9693	1.24035
1	MIA PaCa2	D14_4	0.01	1_D14_4_61	S	68	48	480	8	82.8554	82.8554	65.2461	1.26989
1	MIA PaCa2	D14_4	0.01	1_D14_4_61	S	69	49	490	8.16667	78.9068	78.9068	64.9541	1.21481
1	MIA PaCa2	D14_4	0.01	1_D14_4_61	S	70	50	500	8.33333	73.8813	73.8813	64.7238	1.14149
1	MIA PaCa2	D14_4	0.01	1_D14_4_61	S	71	51	510	8.5	79.2269	79.2269	64.8745	1.22123
1	MIA PaCa2	D14_4	0.01	1_D14_4_61	S	72	52	520	8.66667	73.9042	73.9042	65.0075	1.13686
1	MIA PaCa2	D14_4	0.01	1_D14_4_61	S	73	53	530	8.83333	69.6831	69.6831	64.3036	1.08366
1	MIA PaCa2	D14_4	0.01	1_D14_4_61	S	74	54	540	9	71.39	71.39	64.0165	1.11518
1	MIA PaCa2	D14_4	0.01	1_D14_4_61	S	75	55	550	9.16667	68.6056	68.6056	64.712	1.06017
1	MIA PaCa2	D14_4	0.01	1_D14_4_61	S	76	56	560	9.33333	68.4961	68.4961	64.0422	1.06955
1	MIA PaCa2	D14_4	0.01	1_D14_4_61	S	77	57	570	9.5	67.888	67.888	63.8764	1.0628
1	MIA PaCa2	D14_4	0.01	1_D14_4_61	S	78	58	580	9.66667	69.7211	69.7211	63.7423	1.0938
1	MIA PaCa2	D14_4	0.01	1_D14_4_76	G2	0	-20	-200	-3.33333	111.067	111.067	102.696	1.08151
1	MIA PaCa2	D14_4	0.01	1_D14_4_76	G2	1	-19	-190	-3.16667	107.445	107.445	98.9025	1.08637
1	MIA PaCa2	D14_4	0.01	1_D14_4_76	G2	2	-18	-180	-3	105.024	105.024	98.287	1.06854
1	MIA PaCa2	D14_4	0.01	1_D14_4_76	G2	3	-17	-170	-2.83333	102.287	102.287	95.5639	1.07035
1	MIA PaCa2	D14_4	0.01	1_D14_4_76	G2	4	-16	-160	-2.66667	101.633	101.633	94.8279	1.07176
1	MIA PaCa2	D14_4	0.01	1_D14_4_76	G2	5	-15	-150	-2.5	100.779	100.779	93.7282	1.07523
1	MIA PaCa2	D14_4	0.01	1_D14_4_76	G2	6	-14	-140	-2.33333	99.2893	99.2893	91.2043	1.08865
1	MIA PaCa2	D14_4	0.01	1_D14_4_76	G2	7	-13	-130	-2.16667	94.4083	94.4083	91.0398	1.037
[truncated: 50,284 more rows]

## Sheet: Fig1 D,E
Bio_rep	TNF	Cell_line	Track_ID	Peak_RELA_amplitude	Time_to_peak_RELA	Stage
1	0.01	MIA PaCa2	1_D13_2_131	1.08446	30	S
1	0.01	MIA PaCa2	1_D13_3_21	1.18803	40	S
1	0.01	MIA PaCa2	1_D13_3_87	1.18915	50	G1
1	0.01	MIA PaCa2	1_D13_4_5	1.13211	30	G2
1	0.01	MIA PaCa2	1_D14_1_16	0.954451	30	S
1	0.01	MIA PaCa2	1_D14_1_9	0.895561	20	S
1	0.01	MIA PaCa2	1_D14_3_5	1.03683	70	G2
1	0.01	MIA PaCa2	1_D14_3_70	1.49905	70	S
1	0.01	MIA PaCa2	1_D14_3_72	1.37432	50	S
1	0.01	MIA PaCa2	1_D14_3_74	0.982537	20	G1
1	0.01	MIA PaCa2	1_D14_3_76	1.08874	50	G1
1	0.01	MIA PaCa2	1_D14_4_100	1.20666	40	S
1	0.01	MIA PaCa2	1_D14_4_102	1.1543	60	S
1	0.01	MIA PaCa2	1_D14_4_106	1.06763	40	G1
1	0.01	MIA PaCa2	1_D14_4_61	1.10688	50	S
1	0.01	MIA PaCa2	1_D14_4_76	1.21883	50	G2
1	0.01	MIA PaCa2	1_D15_1_61	1.07418	40	S
1	0.01	MIA PaCa2	1_D15_2_42	1.13359	40	G1
1	0.01	MIA PaCa2	1_D15_3_11	1.15718	20	S
1	0.01	MIA PaCa2	1_D15_3_91	1.1391	50	S
1	0.01	MIA PaCa2	1_D15_3_95	1.05852	40	S
1	0.01	MIA PaCa2	1_D15_4_35	1.1769	50	G2
1	0.01	MIA PaCa2	1_D16_1_13	1.09231	60	G2
1	0.01	MIA PaCa2	1_D16_1_33	0.874898	20	S
1	0.01	MIA PaCa2	1_D16_1_7	0.929033	20	S
1	0.01	PANC1	1_E13_2_52	1.1272	40	G1
1	0.01	PANC1	1_E13_2_54	1.1012	30	G1
1	0.01	PANC1	1_E14_1_33	1.14515	50	S
1	0.01	PANC1	1_E14_4_22	1.0887	30	G1
1	0.01	PANC1	1_E15_1_11	1.08039	40	S
1	0.01	PANC1	1_E15_1_12	0.939165	40	S
1	0.01	PANC1	1_E15_4_47	1.08296	20	S
1	0.01	PANC1	1_E16_2_11	1.00045	30	G1
1	0.01	PANC1	1_E16_2_5	0.960572	30	S
1	0.01	PANC1	1_E16_2_7	0.878239	20	S
1	0.01	PANC1	1_E17_1_5	1.10186	40	S
1	0.01	PANC1	1_E17_1_6	0.970522	30	S
1	0.01	PANC1	1_E17_2_21	1.01306	20	S
1	0.01	PANC1	1_E17_2_92	1.2189	40	G1
1	0.01	PANC1	1_E17_2_94	1.22229	40	G1
1	0.01	PANC1	1_E17_3_44	1.19525	40	S
1	0.01	PANC1	1_E17_3_49	1.11759	30	S
1	0.01	PANC1	1_E17_4_6	1.12001	40	S
1	0.01	PANC1	1_E17_4_9	1.14875	40	S
1	0.01	PANC1	1_E18_1_6	0.91348	20	S
1	0.01	PANC1	1_E18_3_5	1.15043	40	S
1	0.01	PANC1	1_E19_4_21	0.977464	30	S
1	0.01	PANC1	1_E20_1_5	0.832597	20	S
1	0.01	PANC1	1_E20_1_7	1.03489	40	S
1	0.1	MIA PaCa2	1_G4_2_13	1.26097	50	S
1	0.1	MIA PaCa2	1_G4_2_132	1.30028	30	S
1	0.1	MIA PaCa2	1_G4_2_134	1.29462	50	G1
1	0.1	MIA PaCa2	1_G4_2_67	1.22077	50	G2
1	0.1	MIA PaCa2	1_G4_2_72	1.28967	60	S
1	0.1	MIA PaCa2	1_G4_3_26	1.14192	50	S
1	0.1	MIA PaCa2	1_G4_3_41	1.05789	50	G1
1	0.1	MIA PaCa2	1_G4_3_43	1.06018	40	G1
1	0.1	MIA PaCa2	1_G4_3_45	1.12111	50	S
1	0.1	MIA PaCa2	1_G4_3_47	1.19444	50	S
1	0.1	MIA PaCa2	1_G4_3_8	1.18899	40	S
1	0.1	MIA PaCa2	1_G4_4_11	1.1396	50	S
1	0.1	MIA PaCa2	1_G4_4_124	1.1644	50	G1
1	0.1	MIA PaCa2	1_G5_2_116	1.25499	60	G1
1	0.1	MIA PaCa2	1_G5_2_13	1.14406	40	G1
1	0.1	MIA PaCa2	1_G5_2_14	1.25331	40	S
1	0.1	MIA PaCa2	1_G5_2_19	1.30206	60	G1
1	0.1	MIA PaCa2	1_G5_3_18	1.11133	50	S
1	0.1	MIA PaCa2	1_G5_3_190	1.20084	50	G1
1	0.1	MIA PaCa2	1_G5_3_193	1.32068	50	S
1	0.1	MIA PaCa2	1_G5_3_196	1.20859	40	G1
1	0.1	MIA PaCa2	1_G5_3_40	1.25736	40	S
1	0.1	MIA PaCa2	1_G5_3_49	1.16448	50	S
1	0.1	MIA PaCa2	1_G5_4_18	1.03382	40	S
1	0.1	MIA PaCa2	1_G5_4_22	1.13417	40	S
1	0.1	MIA PaCa2	1_G5_4_32	1.27564	40	G2
1	0.1	MIA PaCa2	1_G5_4_44	1.25335	50	G2
1	0.1	MIA PaCa2	1_G5_4_57	1.19544	40	S
1	0.1	MIA PaCa2	1_G5_4_58	1.20327	50	G2
1	0.1	MIA PaCa2	1_G6_2_10	1.2499	40	S
1	0.1	MIA PaCa2	1_G6_2_147	1.12001	70	G1
1	0.1	MIA PaCa2	1_G6_2_15	1.30491	40	S
1	0.1	MIA PaCa2	1_G6_2_25	1.21069	50	G2
1	0.1	MIA PaCa2	1_G6_2_41	1.18313	40	G2
1	0.1	MIA PaCa2	1_G6_3_111	1.1837	30	S
1	0.1	MIA PaCa2	1_G6_3_220	1.28086	40	S
1	0.1	MIA PaCa2	1_G6_3_26	1.05101	30	S
1	0.1	MIA PaCa2	1_G6_3_46	1.44358	50	S
1	0.1	MIA PaCa2	1_G6_3_66	1.05224	40	S
1	0.1	MIA PaCa2	1_G6_3_9	1.19323	40	S
1	0.1	MIA PaCa2	1_G7_1_17	1.31255	40	G2
1	0.1	MIA PaCa2	1_G7_1_19	1.12003	50	S
1	0.1	MIA PaCa2	1_G7_1_20	1.26033	50	S
1	0.1	MIA PaCa2	1_G7_1_60	1.34823	50	G1
1	0.1	MIA PaCa2	1_G7_1_62	1.31029	60	G1
1	0.1	MIA PaCa2	1_G7_1_64	1.06416	50	S
1	0.1	PANC1	1_H11_1_63	1.07641	40	G1
1	0.1	PANC1	1_H11_1_65	1.17738	50	G1
1	0.1	PANC1	1_H4_2_7	1.04034	40	S
1	0.1	PANC1	1_H4_2_73	1.06037	50	S
1	0.1	PANC1	1_H4_3_5	0.937825	20	G1
1	0.1	PANC1	1_H4_3_6	1.01835	30	S
1	0.1	PANC1	1_H4_3_7	0.996842	30	Unclear
1	0.1	PANC1	1_H4_3_9	0.995546	40	S
1	0.1	PANC1	1_H4_4_11	0.989844	30	G1
1	0.1	PANC1	1_H5_1_5	0.952643	30	S
1	0.1	PANC1	1_H5_1_6	1.17037	60	S
1	0.1	PANC1	1_H5_1_8	1.08071	60	S
1	0.1	PANC1	1_H5_1_9	1.0873	70	G1
1	0.1	PANC1	1_H5_2_14	0.977603	40	S
1	0.1	PANC1	1_H5_2_5	1.02754	40	G1
1	0.1	PANC1	1_H5_2_6	0.864658	30	S
1	0.1	PANC1	1_H5_2_79	1.07376	60	S
1	0.1	PANC1	1_H5_2_8	1.0703	40	G1
1	0.1	PANC1	1_H5_4_12	1.19811	60	S
1	0.1	PANC1	1_H6_1_10	0.932328	40	S
1	0.1	PANC1	1_H6_1_67	1.05665	40	S
1	0.1	PANC1	1_H6_1_7	0.905125	40	S
1	0.1	PANC1	1_H6_2_10	1.05662	60	S
1	0.1	PANC1	1_H6_3_6	1.2989	110	G1
1	0.1	PANC1	1_H6_4_42	1.06602	40	G1
1	0.1	PANC1	1_H6_4_46	1.13952	30	S
1	0.1	PANC1	1_H6_4_50	1.16656	40	G1
1	0.1	PANC1	1_H7_1_10	0.990181	20	S
1	0.1	PANC1	1_H7_1_5	0.915408	20	S
1	0.1	PANC1	1_H7_1_9	1.18315	60	S
1	0.1	PANC1	1_H7_2_28	1.31204	70	S
1	0.1	PANC1	1_H7_2_9	1.28471	50	S
1	0.1	PANC1	1_H7_3_7	0.954499	30	S
1	0.1	PANC1	1_H7_3_8	1.0814	40	S
1	0.1	PANC1	1_H7_3_9	1.06734	40	S
1	0.1	PANC1	1_H7_4_12	1.237	40	G2
1	0.1	PANC1	1_H7_4_38	1.02143	40	G1
1	0.1	PANC1	1_H7_4_40	1.05811	60	G1
1	0.1	PANC1	1_H8_1_10	1.30835	70	S
1	0.1	PANC1	1_H8_1_8	1.03469	80	S
1	0.1	PANC1	1_H8_1_9	1.42255	60	S
1	0.1	PANC1	1_H9_2_59	1.008	30	G1
1	0.1	PANC1	1_H9_2_61	1.0372	70	G1
1	10	MIA PaCa2	1_G13_1_5	1.42368	30	S
1	10	MIA PaCa2	1_G13_1_69	1.23082	30	G2
1	10	MIA PaCa2	1_G13_2_97	1.56513	70	G1
1	10	MIA PaCa2	1_G13_3_23	1.22427	50	G2
1	10	MIA PaCa2	1_G14_2_10	1.52486	60	S
1	10	MIA PaCa2	1_G14_2_21	1.40801	30	S
1	10	MIA PaCa2	1_G14_2_79	1.488	30	S
1	10	MIA PaCa2	1_G15_3_14	1.18223	40	S
1	10	PANC1	1_H13_1_45	1.1014	50	G1
1	10	PANC1	1_H13_1_47	1.11784	30	G1
1	10	PANC1	1_H13_1_6	1.23252	30	S
1	10	PANC1	1_H13_1_9	1.15615	50	S
1	10	PANC1	1_H13_2_5	1.23836	50	S
1	10	PANC1	1_H13_3_7	1.21433	50	S
1	10	PANC1	1_H13_3_9	1.33758	60	S
1	10	PANC1	1_H13_4_37	1.42339	30	S
1	10	PANC1	1_H13_4_7	1.32437	30	S
1	10	PANC1	1_H14_1_5	1.33286	30	S
1	10	PANC1	1_H14_2_17	1.48694	50	S
1	10	PANC1	1_H14_2_5	1.33733	60	S
1	10	PANC1	1_H14_2_6	1.4733	50	S
1	10	PANC1	1_H14_2_69	1.18748	40	G1
1	10	PANC1	1_H14_2_71	1.14775	40	G1
1	10	PANC1	1_H14_2_9	1.47967	40	G1
1	10	PANC1	1_H14_3_12	1.62	120	S
1	10	PANC1	1_H14_3_5	1.33575	50	S
1	10	PANC1	1_H14_3_6	1.28073	50	S
1	10	PANC1	1_H14_3_7	1.31854	70	S
1	10	PANC1	1_H14_4_5	1.2499	40	S
1	10	PANC1	1_H14_4_51	1.28617	20	G1
1	10	PANC1	1_H14_4_53	1.29743	20	G1
1	10	PANC1	1_H15_2_10	1.29892	50	S
1	10	PANC1	1_H15_2_12	1.34305	40	S
1	10	PANC1	1_H15_2_13	1.51123	60	S
1	10	PANC1	1_H15_2_15	1.42174	40	G2
1	10	PANC1	1_H15_2_43	1.10761	40	S
1	10	PANC1	1_H15_2_7	1.2075	50	G1
1	10	PANC1	1_H15_2_8	1.22914	50	S
1	10	PANC1	1_H15_2_92	1.48165	50	G1
1	10	PANC1	1_H15_2_94	1.35136	40	G1
1	10	PANC1	1_H15_3_10	1.37461	50	S
1	10	PANC1	1_H15_3_5	1.37708	40	S
1	10	PANC1	1_H15_3_77	1.18352	20	G1
1	10	PANC1	1_H16_1_28	1.20414	40	G1
1	10	PANC1	1_H16_1_8	1.24121	50	S
1	10	PANC1	1_H16_2_24	1.21249	40	G1
1	10	PANC1	1_H16_2_26	1.19245	50	G1
1	10	PANC1	1_H16_3_11	1.24524	40	G2
1	10	PANC1	1_H16_3_20	1.23765	40	S
1	10	PANC1	1_H16_3_45	1.31556	30	S
1	10	PANC1	1_H16_3_46	1.40063	20	S
1	10	PANC1	1_H16_3_50	1.33466	50	S
1	10	PANC1	1_H16_4_8	1.27275	50	G2
1	10	PANC1	1_H17_3_5	1.41999	50	S
1	10	PANC1	1_H17_4_10	1.75845	50	S
1	10	PANC1	1_H17_4_5	1.23611	60	G2
1	10	PANC1	1_H17_4_7	1.20082	40	G1
2	0.01	MIA PaCa2	2_D13_1_100	0.98431	30	S
2	0.01	MIA PaCa2	2_D13_1_101	1.00496	50	S
2	0.01	MIA PaCa2	2_D13_1_25	0.924912	50	G1
2	0.01	MIA PaCa2	2_D13_2_11	1.17456	40	S
2	0.01	MIA PaCa2	2_D13_2_30	1.35187	50	S
2	0.01	MIA PaCa2	2_D13_3_104	1.07164	60	S
2	0.01	MIA PaCa2	2_D13_3_106	1.07254	60	G2
2	0.01	MIA PaCa2	2_D13_3_325	1.09768	30	S
2	0.01	MIA PaCa2	2_D13_3_34	1.15438	40	S
2	0.01	MIA PaCa2	2_D13_4_23	1.14967	40	S
2	0.01	MIA PaCa2	2_D13_4_315	1.15576	50	S
2	0.01	MIA PaCa2	2_D13_4_52	1.04605	60	S
2	0.01	MIA PaCa2	2_D14_1_204	0.982653	30	S
2	0.01	MIA PaCa2	2_D14_1_217	1.12276	20	S
2	0.01	MIA PaCa2	2_D14_1_22	1.0798	70	G1
2	0.01	MIA PaCa2	2_D14_1_36	0.835709	20	G2
2	0.01	MIA PaCa2	2_D14_1_498	1.18132	40	G2
2	0.01	MIA PaCa2	2_D14_1_61	0.959602	60	S
2	0.01	MIA PaCa2	2_D14_4_118	1.28251	40	S
2	0.01	MIA PaCa2	2_D14_4_122	1.08038	30	G2
2	0.01	MIA PaCa2	2_D14_4_18	1.11468	30	S
2	0.01	MIA PaCa2	2_D14_4_20	1.15074	20	G1
2	0.01	MIA PaCa2	2_D14_4_22	1.01456	30	S
2	0.01	MIA PaCa2	2_D14_4_5	0.992744	20	G2
2	0.01	PANC1	2_E13_3_23	1.08382	20	S
2	0.01	PANC1	2_E13_3_43	1.05515	30	S
2	0.01	PANC1	2_E13_4_11	1.11773	30	G1
2	0.01	PANC1	2_E14_4_115	1.05977	20	G1
2	0.01	PANC1	2_E14_4_29	1.09264	30	G1
2	0.01	PANC1	2_E14_4_5	1.1547	40	S
2	0.01	PANC1	2_E14_4_73	1.11088	40	G1
2	0.1	MIA PaCa2	2_G4_1_14	1.26471	50	S
2	0.1	MIA PaCa2	2_G4_1_21	1.42609	70	S
2	0.1	MIA PaCa2	2_G4_1_249	1.38202	50	S
2	0.1	MIA PaCa2	2_G4_1_29	1.27279	50	G1
2	0.1	MIA PaCa2	2_G4_1_319	1.2641	30	G1
2	0.1	MIA PaCa2	2_G4_1_348	1.46882	100	S
2	0.1	MIA PaCa2	2_G4_1_38	1.29278	40	G1
2	0.1	MIA PaCa2	2_G4_1_441	1.16087	40	S
2	0.1	MIA PaCa2	2_G4_2_11	1.31995	40	S
2	0.1	MIA PaCa2	2_G4_2_155	1.34389	40	G2
2	0.1	MIA PaCa2	2_G4_2_16	1.32442	50	G1
2	0.1	MIA PaCa2	2_G4_2_170	1.29869	30	S
2	0.1	MIA PaCa2	2_G4_2_20	1.3007	40	S
2	0.1	MIA PaCa2	2_G4_2_24	1.17663	50	S
2	0.1	MIA PaCa2	2_G4_2_249	1.35444	50	G1
2	0.1	MIA PaCa2	2_G4_3_181	1.08993	40	S
2	0.1	MIA PaCa2	2_G4_3_322	1.11373	40	S
2	0.1	MIA PaCa2	2_G4_3_70	1.24136	50	G2
2	0.1	MIA PaCa2	2_G4_4_292	1.25293	40	S
2	0.1	MIA PaCa2	2_G4_4_9	1.19779	30	G1
2	0.1	MIA PaCa2	2_G5_1_184	1.21744	40	S
2	0.1	MIA PaCa2	2_G5_1_41	1.08987	40	S
2	0.1	MIA PaCa2	2_G5_2_140	1.12039	40	S
2	0.1	MIA PaCa2	2_G5_2_15	1.12074	50	S
2	0.1	MIA PaCa2	2_G5_2_216	1.12339	40	S
2	0.1	MIA PaCa2	2_G5_3_12	1.18255	50	G2
2	0.1	MIA PaCa2	2_G5_3_150	1.20516	60	G1
2	0.1	MIA PaCa2	2_G5_3_16	1.18858	40	S
2	0.1	MIA PaCa2	2_G5_3_31	1.2481	30	S
2	0.1	MIA PaCa2	2_G5_3_46	1.16679	50	S
2	0.1	MIA PaCa2	2_G5_3_7	1.08605	60	G1
2	0.1	MIA PaCa2	2_G5_4_104	1.16802	40	S
2	0.1	MIA PaCa2	2_G5_4_122	1.19255	20	S
2	0.1	MIA PaCa2	2_G5_4_18	1.1799	40	S
2	0.1	MIA PaCa2	2_G5_4_34	1.23727	50	G1
2	0.1	MIA PaCa2	2_G5_4_404	1.18573	20	G1
2	0.1	MIA PaCa2	2_G6_1_30	1.14403	30	G2
2	0.1	MIA PaCa2	2_G6_1_52	1.09726	30	S
2	0.1	PANC1	2_H4_2_11	1.03982	40	S
2	0.1	PANC1	2_H4_2_14	1.00674	30	G1
2	0.1	PANC1	2_H4_2_6	1.07845	20	S
2	0.1	PANC1	2_H4_2_7	1.04749	30	G1
2	0.1	PANC1	2_H4_2_8	1.1231	30	S
2	0.1	PANC1	2_H4_3_18	1.11324	60	S
2	0.1	PANC1	2_H4_3_23	1.15274	20	S
2	0.1	PANC1	2_H4_3_24	1.04385	40	G2
2	0.1	PANC1	2_H4_4_11	1.03107	40	G1
2	0.1	PANC1	2_H4_4_5	1.06079	30	S
2	0.1	PANC1	2_H5_1_7	0.902003	20	S
2	0.1	PANC1	2_H5_2_15	1.17691	40	S
2	0.1	PANC1	2_H5_2_24	1.28302	30	S
2	0.1	PANC1	2_H6_1_11	0.913176	30	S
2	0.1	PANC1	2_H6_1_136	0.93284	30	G2
2	0.1	PANC1	2_H6_1_38	1.15766	40	S
2	0.1	PANC1	2_H6_1_6	0.848741	20	G1
2	0.1	PANC1	2_H6_1_64	1.08724	30	S
2	0.1	PANC1	2_H6_2_21	1.07049	40	S
2	0.1	PANC1	2_H6_2_29	1.06478	30	S
2	0.1	PANC1	2_H6_2_37	0.950273	20	S
2	0.1	PANC1	2_H6_2_6	1.06257	40	S
2	0.1	PANC1	2_H6_3_141	1.06424	30	S
2	0.1	PANC1	2_H6_3_22	1.19484	30	S
2	0.1	PANC1	2_H6_3_7	1.32018	30	G1
2	0.1	PANC1	2_H6_4_147	1.30418	100	S
2	0.1	PANC1	2_H6_4_37	1.42617	50	G1
2	0.1	PANC1	2_H6_4_5	1.33711	30	S
2	0.1	PANC1	2_H6_4_9	1.27393	60	S
2	0.1	PANC1	2_H7_2_21	1.0948	40	S
2	0.1	PANC1	2_H7_2_6	1.41711	50	S
2	0.1	PANC1	2_H8_1_104	1.0639	30	NA
2	0.1	PANC1	2_H8_1_24	0.910095	20	G2
2	0.1	PANC1	2_H8_1_5	1.10688	30	S
2	0.1	PANC1	2_H8_1_6	1.04319	40	G1
2	10	MIA PaCa2	2_G13_1_40	1.43007	40	G1
2	10	MIA PaCa2	2_G13_3_19	1.37982	40	S
2	10	MIA PaCa2	2_G13_3_231	1.30157	50	S
2	10	MIA PaCa2	2_G13_3_55	1.1321	20	G2
2	10	MIA PaCa2	2_G13_3_6	1.368	50	S
2	10	MIA PaCa2	2_G14_3_348	1.34994	40	G1
2	10	MIA PaCa2	2_G14_4_6	1.26821	30	G2
2	10	MIA PaCa2	2_G15_2_263	1.36366	30	S
2	10	MIA PaCa2	2_G15_2_27	1.46881	80	S
2	10	MIA PaCa2	2_G15_2_329	1.23811	50	G1
2	10	MIA PaCa2	2_G15_2_372	1.38938	50	S
2	10	PANC1	2_H13_1_9	1.04542	30	S
2	10	PANC1	2_H13_2_120	1.47278	110	S
2	10	PANC1	2_H13_2_29	1.38445	30	G2
2	10	PANC1	2_H13_3_10	1.25997	50	S
2	10	PANC1	2_H13_3_143	1.47387	40	S
2	10	PANC1	2_H13_3_23	1.31664	30	S
2	10	PANC1	2_H13_3_30	1.1521	40	S
2	10	PANC1	2_H13_3_42	1.15858	20	S
2	10	PANC1	2_H13_3_43	1.34618	50	S
2	10	PANC1	2_H13_3_56	1.27861	70	G1
2	10	PANC1	2_H13_3_94	1.19997	30	NA
2	10	PANC1	2_H13_4_16	1.56383	30	S
2	10	PANC1	2_H13_4_23	1.34308	90	S
2	10	PANC1	2_H13_4_5	1.18206	60	S
2	10	PANC1	2_H13_4_7	1.27427	60	G1
2	10	PANC1	2_H14_1_104	1.27431	20	S
2	10	PANC1	2_H14_1_15	1.23351	20	S
2	10	PANC1	2_H14_1_17	1.15094	30	S
2	10	PANC1	2_H14_1_25	1.20653	20	S
2	10	PANC1	2_H14_1_38	0.993527	20	S
2	10	PANC1	2_H14_2_110	1.16949	30	S
2	10	PANC1	2_H14_2_122	1.15585	30	S
2	10	PANC1	2_H14_2_32	1.34427	50	S
2	10	PANC1	2_H14_2_35	1.44147	40	S
2	10	PANC1	2_H14_2_37	1.30221	40	S
2	10	PANC1	2_H14_2_75	1.32901	60	S
2	10	PANC1	2_H14_4_117	1.3825	30	S
2	10	PANC1	2_H14_4_25	1.30851	40	S
2	10	PANC1	2_H14_4_31	1.30529	30	G2
2	10	PANC1	2_H14_4_34	1.19778	40	S
2	10	PANC1	2_H14_4_6	1.30715	30	S
2	10	PANC1	2_H14_4_68	1.64994	60	S

## Sheet: Fig1Supp1 B
Bio_rep	Cell_line	Well_Field	TNF	Track_ID	Stage	Frame	Frame_after_TNF	Time_after_TNF_min	Time_after_TNF_hr	Nuc_RELA	Nuc_RELA_imputed	Control_RELA	Nuc_RELA_norm
1	MIA PaCa2	D13_2	0.01	1_D13_2_131	S	5	-15	-150	-2.5	99.9511	99.9511	93.7282	1.06639
1	MIA PaCa2	D13_2	0.01	1_D13_2_131	S	6	-14	-140	-2.33333	100	100	91.2043	1.09644
1	MIA PaCa2	D13_2	0.01	1_D13_2_131	S	7	-13	-130	-2.16667	104.718	104.718	91.0398	1.15024
1	MIA PaCa2	D13_2	0.01	1_D13_2_131	S	8	-12	-120	-2	107.724	107.724	89.9628	1.19742
1	MIA PaCa2	D13_2	0.01	1_D13_2_131	S	9	-11	-110	-1.83333	104.896	104.896	88.8498	1.1806
1	MIA PaCa2	D13_2	0.01	1_D13_2_131	S	10	-10	-100	-1.66667	101.097	101.097	88.0257	1.14849
1	MIA PaCa2	D13_2	0.01	1_D13_2_131	S	11	-9	-90	-1.5	95.2984	95.2984	87.39	1.0905
1	MIA PaCa2	D13_2	0.01	1_D13_2_131	S	12	-8	-80	-1.33333	97.3091	97.3091	86.2825	1.1278
1	MIA PaCa2	D13_2	0.01	1_D13_2_131	S	13	-7	-70	-1.16667	92.0996	92.0996	84.872	1.08516
1	MIA PaCa2	D13_2	0.01	1_D13_2_131	S	14	-6	-60	-1	94.4425	94.4425	85.6506	1.10265
1	MIA PaCa2	D13_2	0.01	1_D13_2_131	S	15	-5	-50	-0.833333	98.8376	98.8376	84.1405	1.17467
1	MIA PaCa2	D13_2	0.01	1_D13_2_131	S	16	-4	-40	-0.666667	101.708	101.708	82.5286	1.2324
1	MIA PaCa2	D13_2	0.01	1_D13_2_131	S	17	-3	-30	-0.5	88.3071	88.3071	83.098	1.06269
1	MIA PaCa2	D13_2	0.01	1_D13_2_131	S	18	-2	-20	-0.333333	88.1418	88.1418	82.7797	1.06478
1	MIA PaCa2	D13_2	0.01	1_D13_2_131	S	19	-1	-10	-0.166667	87.9154	87.9154	82.0129	1.07197
1	MIA PaCa2	D13_2	0.01	1_D13_2_131	S	20	0	0	0	85.575	85.575	81.1847	1.05408
1	MIA PaCa2	D13_2	0.01	1_D13_2_131	S	21	1	10	0.166667	90.4083	90.4083	84.5183	1.06969
1	MIA PaCa2	D13_2	0.01	1_D13_2_131	S	22	2	20	0.333333	88.7667	88.7667	82.9015	1.07075
1	MIA PaCa2	D13_2	0.01	1_D13_2_131	S	23	3	30	0.5	88.9964	88.9964	82.0655	1.08446
1	MIA PaCa2	D13_2	0.01	1_D13_2_131	S	24	4	40	0.666667	89.8259	89.8259	80.9707	1.10936
1	MIA PaCa2	D13_2	0.01	1_D13_2_131	S	25	5	50	0.833333	88.3736	88.3736	80.691	1.09521
1	MIA PaCa2	D13_2	0.01	1_D13_2_131	S	26	6	60	1	88.8784	88.8784	79.6097	1.11643
1	MIA PaCa2	D13_2	0.01	1_D13_2_131	S	27	7	70	1.16667	85.7546	85.7546	79.1117	1.08397
1	MIA PaCa2	D13_2	0.01	1_D13_2_131	S	28	8	80	1.33333	83.0481	83.0481	78.0016	1.0647
1	MIA PaCa2	D13_2	0.01	1_D13_2_131	S	29	9	90	1.5	85.1754	85.1754	77.8528	1.09406
1	MIA PaCa2	D13_2	0.01	1_D13_2_131	S	31	11	110	1.83333	87.8484	87.8484	77.1169	1.13916
1	MIA PaCa2	D13_2	0.01	1_D13_2_131	S	32	12	120	2	89.5629	89.5629	76.7701	1.16664
1	MIA PaCa2	D13_2	0.01	1_D13_2_131	S	33	13	130	2.16667	89.4128	89.4128	75.9843	1.17673
1	MIA PaCa2	D13_2	0.01	1_D13_2_131	S	34	14	140	2.33333	94.5102	94.5102	75.0842	1.25872
1	MIA PaCa2	D13_2	0.01	1_D13_2_131	S	35	15	150	2.5	87.2847	87.2847	75.707	1.15293
1	MIA PaCa2	D13_2	0.01	1_D13_2_131	S	36	16	160	2.66667	89.053	89.053	74.2775	1.19892
1	MIA PaCa2	D13_2	0.01	1_D13_2_131	S	37	17	170	2.83333	81.2779	81.2779	73.2738	1.10923
1	MIA PaCa2	D13_2	0.01	1_D13_2_131	S	38	18	180	3	78.1388	78.1388	73.1743	1.06785
1	MIA PaCa2	D13_2	0.01	1_D13_2_131	S	39	19	190	3.16667	78.5054	78.5054	72.5019	1.0828
1	MIA PaCa2	D13_2	0.01	1_D13_2_131	S	40	20	200	3.33333	79.0309	79.0309	71.7669	1.10122
1	MIA PaCa2	D13_2	0.01	1_D13_2_131	S	41	21	210	3.5	90.485	90.485	72.0161	1.25645
1	MIA PaCa2	D13_2	0.01	1_D13_2_131	S	42	22	220	3.66667	85.0921	85.0921	71.8185	1.18482
1	MIA PaCa2	D13_2	0.01	1_D13_2_131	S	43	23	230	3.83333	82.2073	82.2073	71.1314	1.15571
1	MIA PaCa2	D13_2	0.01	1_D13_2_131	S	44	24	240	4	78.0846	78.0846	70.5922	1.10614
1	MIA PaCa2	D13_2	0.01	1_D13_2_131	S	45	25	250	4.16667	78.1376	78.1376	70.3088	1.11135
1	MIA PaCa2	D13_2	0.01	1_D13_2_131	S	46	26	260	4.33333	80.9472	80.9472	70.5953	1.14664
1	MIA PaCa2	D13_2	0.01	1_D13_2_131	S	47	27	270	4.5	89.8571	89.8571	70.0862	1.28209
1	MIA PaCa2	D13_2	0.01	1_D13_2_131	S	48	28	280	4.66667	82.1491	82.1491	69.4746	1.18243
1	MIA PaCa2	D13_2	0.01	1_D13_2_131	S	49	29	290	4.83333	81.1512	81.1512	68.6304	1.18244
1	MIA PaCa2	D13_2	0.01	1_D13_2_131	S	50	30	300	5	80.8302	80.8302	68.8548	1.17392
1	MIA PaCa2	D13_2	0.01	1_D13_2_131	S	51	31	310	5.16667	80.2941	80.2941	68.1679	1.17789
1	MIA PaCa2	D13_2	0.01	1_D13_2_131	S	52	32	320	5.33333	82.7792	82.7792	67.3507	1.22908
1	MIA PaCa2	D13_2	0.01	1_D13_2_131	S	53	33	330	5.5	79.1667	79.1667	67.9219	1.16555
1	MIA PaCa2	D13_2	0.01	1_D13_2_131	S	54	34	340	5.66667	79.788	79.788	68.0349	1.17275
1	MIA PaCa2	D13_2	0.01	1_D13_2_131	S	55	35	350	5.83333	75.0227	75.0227	68.887	1.08907
1	MIA PaCa2	D13_2	0.01	1_D13_2_131	S	56	36	360	6	77.95	77.95	68.1633	1.14358
1	MIA PaCa2	D13_2	0.01	1_D13_2_131	S	57	37	370	6.16667	83.7123	83.7123	67.2471	1.24485
1	MIA PaCa2	D13_2	0.01	1_D13_2_131	S	58	38	380	6.33333	79.3922	79.3922	67.1163	1.18291
1	MIA PaCa2	D13_2	0.01	1_D13_2_131	S	59	39	390	6.5	72.5299	72.5299	66.9979	1.08257
1	MIA PaCa2	D13_2	0.01	1_D13_2_131	S	60	40	400	6.66667	72.3666	72.3666	66.8466	1.08258
1	MIA PaCa2	D13_2	0.01	1_D13_2_131	S	61	41	410	6.83333	72.9528	72.9528	66.872	1.09093
1	MIA PaCa2	D13_2	0.01	1_D13_2_131	S	62	42	420	7	70.4873	70.4873	67.4151	1.04557
1	MIA PaCa2	D13_2	0.01	1_D13_2_131	S	63	43	430	7.16667	76.5215	76.5215	66.593	1.14909
1	MIA PaCa2	D13_2	0.01	1_D13_2_131	S	64	44	440	7.33333	68.6754	68.6754	64.9413	1.0575
1	MIA PaCa2	D13_2	0.01	1_D13_2_131	S	65	45	450	7.5	69.6311	69.6311	65.8821	1.0569
1	MIA PaCa2	D13_2	0.01	1_D13_2_131	S	66	46	460	7.66667	68.3284	68.3284	65.7717	1.03887
1	MIA PaCa2	D13_2	0.01	1_D13_2_131	S	67	47	470	7.83333	76.5805	76.5805	65.9693	1.16085
1	MIA PaCa2	D13_2	0.01	1_D13_2_131	S	68	48	480	8	71.941	71.941	65.2461	1.10261
1	MIA PaCa2	D13_2	0.01	1_D13_2_131	S	69	49	490	8.16667	70.8346	70.8346	64.9541	1.09053
1	MIA PaCa2	D13_2	0.01	1_D13_2_131	S	70	50	500	8.33333	71.9934	71.9934	64.7238	1.11232
1	MIA PaCa2	D13_2	0.01	1_D13_2_131	S	71	51	510	8.5	73.2298	73.2298	64.8745	1.12879
1	MIA PaCa2	D13_2	0.01	1_D13_2_131	S	72	52	520	8.66667	67.4359	67.4359	65.0075	1.03736
1	MIA PaCa2	D13_2	0.01	1_D13_2_131	S	73	53	530	8.83333	72.4573	72.4573	64.3036	1.1268
1	MIA PaCa2	D13_2	0.01	1_D13_2_131	S	74	54	540	9	67.8775	67.8775	64.0165	1.06031
1	MIA PaCa2	D13_2	0.01	1_D13_2_131	S	75	55	550	9.16667	67.5369	67.5369	64.712	1.04365
1	MIA PaCa2	D13_2	0.01	1_D13_2_131	S	76	56	560	9.33333	68.2662	68.2662	64.0422	1.06596
1	MIA PaCa2	D13_2	0.01	1_D13_2_131	S	77	57	570	9.5	69.4831	69.4831	63.8764	1.08777
1	MIA PaCa2	D13_2	0.01	1_D13_2_131	S	78	58	580	9.66667	67.3045	67.3045	63.7423	1.05588
1	MIA PaCa2	D13_2	0.01	1_D13_2_131	S	79	59	590	9.83333	68.2783	68.2783	63.4249	1.07652
1	MIA PaCa2	D13_2	0.01	1_D13_2_131	S	80	60	600	10	67.2154	67.2154	63.1512	1.06436
1	MIA PaCa2	D13_2	0.01	1_D13_2_131	S	81	61	610	10.1667	68.3553	68.3553	63.2666	1.08043
1	MIA PaCa2	D13_2	0.01	1_D13_2_131	S	82	62	620	10.3333	69.7522	69.7522	62.8471	1.10987
1	MIA PaCa2	D13_2	0.01	1_D13_2_133	S	9	-11	-110	-1.83333	104.168	104.168	88.8498	1.17241
1	MIA PaCa2	D13_2	0.01	1_D13_2_133	S	10	-10	-100	-1.66667	101.026	101.026	88.0257	1.14769
1	MIA PaCa2	D13_2	0.01	1_D13_2_133	S	11	-9	-90	-1.5	97.2603	97.2603	87.39	1.11295
1	MIA PaCa2	D13_2	0.01	1_D13_2_133	S	12	-8	-80	-1.33333	93.524	93.524	86.2825	1.08393
1	MIA PaCa2	D13_2	0.01	1_D13_2_133	S	13	-7	-70	-1.16667	87.1149	87.1149	84.872	1.02643
1	MIA PaCa2	D13_2	0.01	1_D13_2_133	S	14	-6	-60	-1	88.7301	88.7301	85.6506	1.03595
1	MIA PaCa2	D13_2	0.01	1_D13_2_133	S	15	-5	-50	-0.833333	92.0452	92.0452	84.1405	1.09395
1	MIA PaCa2	D13_2	0.01	1_D13_2_133	S	16	-4	-40	-0.666667	86.5	86.5	82.5286	1.04812
1	MIA PaCa2	D13_2	0.01	1_D13_2_133	S	17	-3	-30	-0.5	86.1107	86.1107	83.098	1.03625
1	MIA PaCa2	D13_2	0.01	1_D13_2_133	S	18	-2	-20	-0.333333	84.6324	84.6324	82.7797	1.02238
1	MIA PaCa2	D13_2	0.01	1_D13_2_133	S	19	-1	-10	-0.166667	82.0757	82.0757	82.0129	1.00077
1	MIA PaCa2	D13_2	0.01	1_D13_2_133	S	20	0	0	0	83.312	83.312	81.1847	1.0262
1	MIA PaCa2	D13_2	0.01	1_D13_2_133	S	21	1	10	0.166667	86	86	84.5183	1.01753
1	MIA PaCa2	D13_2	0.01	1_D13_2_133	S	22	2	20	0.333333	85.8821	85.8821	82.9015	1.03595
1	MIA PaCa2	D13_2	0.01	1_D13_2_133	S	23	3	30	0.5	86.1028	86.1028	82.0655	1.0492
1	MIA PaCa2	D13_2	0.01	1_D13_2_133	S	24	4	40	0.666667	88.7683	88.7683	80.9707	1.0963
1	MIA PaCa2	D13_2	0.01	1_D13_2_133	S	25	5	50	0.833333	89.1667	89.1667	80.691	1.10504
1	MIA PaCa2	D13_2	0.01	1_D13_2_133	S	26	6	60	1	88.4964	88.4964	79.6097	1.11163
1	MIA PaCa2	D13_2	0.01	1_D13_2_133	S	27	7	70	1.16667	88.5393	88.5393	79.1117	1.11917
1	MIA PaCa2	D13_2	0.01	1_D13_2_133	S	28	8	80	1.33333	88.3195	88.3195	78.0016	1.13228
1	MIA PaCa2	D13_2	0.01	1_D13_2_133	S	29	9	90	1.5	93.461	93.461	77.8528	1.20048
1	MIA PaCa2	D13_2	0.01	1_D13_2_133	S	31	11	110	1.83333	88.4422	88.4422	77.1169	1.14686
1	MIA PaCa2	D13_2	0.01	1_D13_2_133	S	32	12	120	2	92.8761	92.8761	76.7701	1.2098
1	MIA PaCa2	D13_2	0.01	1_D13_2_133	S	33	13	130	2.16667	82.9586	82.9586	75.9843	1.09179
1	MIA PaCa2	D13_2	0.01	1_D13_2_133	S	34	14	140	2.33333	86.0669	86.0669	75.0842	1.14627
1	MIA PaCa2	D13_2	0.01	1_D13_2_133	S	35	15	150	2.5	85.4554	85.4554	75.707	1.12877
1	MIA PaCa2	D13_2	0.01	1_D13_2_133	S	36	16	160	2.66667	83.7699	83.7699	74.2775	1.1278
1	MIA PaCa2	D13_2	0.01	1_D13_2_133	S	37	17	170	2.83333	90.5543	90.5543	73.2738	1.23583
1	MIA PaCa2	D13_2	0.01	1_D13_2_133	S	38	18	180	3	82.4749	82.4749	73.1743	1.1271
1	MIA PaCa2	D13_2	0.01	1_D13_2_133	S	39	19	190	3.16667	82.1277	82.1277	72.5019	1.13277
1	MIA PaCa2	D13_2	0.01	1_D13_2_133	S	40	20	200	3.33333	80.3218	80.3218	71.7669	1.1192
1	MIA PaCa2	D13_2	0.01	1_D13_2_133	S	41	21	210	3.5	88.1851	88.1851	72.0161	1.22452
1	MIA PaCa2	D13_2	0.01	1_D13_2_133	S	42	22	220	3.66667	84.9121	84.9121	71.8185	1.18231
1	MIA PaCa2	D13_2	0.01	1_D13_2_133	S	43	23	230	3.83333	82.1167	82.1167	71.1314	1.15444
1	MIA PaCa2	D13_2	0.01	1_D13_2_133	S	44	24	240	4	80.5504	80.5504	70.5922	1.14107
1	MIA PaCa2	D13_2	0.01	1_D13_2_133	S	45	25	250	4.16667	78.1565	78.1565	70.3088	1.11162
1	MIA PaCa2	D13_2	0.01	1_D13_2_133	S	46	26	260	4.33333	75.9352	75.9352	70.5953	1.07564
1	MIA PaCa2	D13_2	0.01	1_D13_2_133	S	47	27	270	4.5	75.323	75.323	70.0862	1.07472
1	MIA PaCa2	D13_2	0.01	1_D13_2_133	S	48	28	280	4.66667	74.8159	74.8159	69.4746	1.07688
1	MIA PaCa2	D13_2	0.01	1_D13_2_133	S	49	29	290	4.83333	76.1321	76.1321	68.6304	1.10931
1	MIA PaCa2	D13_2	0.01	1_D13_2_133	S	50	30	300	5	76.6613	76.6613	68.8548	1.11338
1	MIA PaCa2	D13_2	0.01	1_D13_2_133	S	51	31	310	5.16667	79.8456	79.8456	68.1679	1.17131
1	MIA PaCa2	D13_2	0.01	1_D13_2_133	S	52	32	320	5.33333	80.009	80.009	67.3507	1.18795
1	MIA PaCa2	D13_2	0.01	1_D13_2_133	S	53	33	330	5.5	76.1914	76.1914	67.9219	1.12175
1	MIA PaCa2	D13_2	0.01	1_D13_2_133	S	54	34	340	5.66667	78.2883	78.2883	68.0349	1.15071
1	MIA PaCa2	D13_2	0.01	1_D13_2_133	S	55	35	350	5.83333	76.9351	76.9351	68.887	1.11683
1	MIA PaCa2	D13_2	0.01	1_D13_2_133	S	56	36	360	6	76.2455	76.2455	68.1633	1.11857
1	MIA PaCa2	D13_2	0.01	1_D13_2_133	S	57	37	370	6.16667	77.5367	77.5367	67.2471	1.15301
1	MIA PaCa2	D13_2	0.01	1_D13_2_133	S	58	38	380	6.33333	75.2192	75.2192	67.1163	1.12073
1	MIA PaCa2	D13_2	0.01	1_D13_2_133	S	59	39	390	6.5	81.0414	81.0414	66.9979	1.20961
1	MIA PaCa2	D13_2	0.01	1_D13_2_133	S	60	40	400	6.66667	83.2281	83.2281	66.8466	1.24506
1	MIA PaCa2	D13_2	0.01	1_D13_2_133	S	61	41	410	6.83333	83.5586	83.5586	66.872	1.24953
1	MIA PaCa2	D13_2	0.01	1_D13_2_133	S	62	42	420	7	79.9505	79.9505	67.4151	1.18594
1	MIA PaCa2	D13_2	0.01	1_D13_2_133	S	63	43	430	7.16667	75.9461	75.9461	66.593	1.14045
1	MIA PaCa2	D13_2	0.01	1_D13_2_133	S	64	44	440	7.33333	73.5484	73.5484	64.9413	1.13254
1	MIA PaCa2	D13_2	0.01	1_D13_2_133	S	65	45	450	7.5	76.5552	76.5552	65.8821	1.162
1	MIA PaCa2	D13_2	0.01	1_D13_2_133	S	66	46	460	7.66667	73.6367	73.6367	65.7717	1.11958
1	MIA PaCa2	D13_2	0.01	1_D13_2_133	S	67	47	470	7.83333	70.8235	70.8235	65.9693	1.07358
1	MIA PaCa2	D13_2	0.01	1_D13_2_133	S	68	48	480	8	70.498	70.498	65.2461	1.08049
1	MIA PaCa2	D13_2	0.01	1_D13_2_133	S	69	49	490	8.16667	71.644	71.644	64.9541	1.10299
1	MIA PaCa2	D13_2	0.01	1_D13_2_133	S	70	50	500	8.33333	71.6203	71.6203	64.7238	1.10655
1	MIA PaCa2	D13_2	0.01	1_D13_2_133	S	71	51	510	8.5	71.3023	71.3023	64.8745	1.09908
1	MIA PaCa2	D13_2	0.01	1_D13_2_133	S	72	52	520	8.66667	70.3769	70.3769	65.0075	1.0826
1	MIA PaCa2	D13_2	0.01	1_D13_2_133	S	73	53	530	8.83333	72.1296	72.1296	64.3036	1.1217
1	MIA PaCa2	D13_2	0.01	1_D13_2_133	S	74	54	540	9	81.8685	81.8685	64.0165	1.27887
1	MIA PaCa2	D13_2	0.01	1_D13_2_133	S	75	55	550	9.16667	81.0418	81.0418	64.712	1.25235
1	MIA PaCa2	D13_2	0.01	1_D13_2_133	S	76	56	560	9.33333	71.1523	71.1523	64.0422	1.11102
1	MIA PaCa2	D13_2	0.01	1_D13_2_133	S	77	57	570	9.5	71.2244	71.2244	63.8764	1.11503
1	MIA PaCa2	D13_2	0.01	1_D13_2_27	S	1	-19	-190	-3.16667	113.158	113.158	98.9025	1.14414
1	MIA PaCa2	D13_2	0.01	1_D13_2_27	S	2	-18	-180	-3	110.681	110.681	98.287	1.1261
1	MIA PaCa2	D13_2	0.01	1_D13_2_27	S	3	-17	-170	-2.83333	106.572	106.572	95.5639	1.11519
1	MIA PaCa2	D13_2	0.01	1_D13_2_27	S	4	-16	-160	-2.66667	106.611	106.611	94.8279	1.12426
1	MIA PaCa2	D13_2	0.01	1_D13_2_27	S	5	-15	-150	-2.5	108.34	108.34	93.7282	1.1559
1	MIA PaCa2	D13_2	0.01	1_D13_2_27	S	6	-14	-140	-2.33333	105.973	105.973	91.2043	1.16193
1	MIA PaCa2	D13_2	0.01	1_D13_2_27	S	7	-13	-130	-2.16667	104.28	104.28	91.0398	1.14543
1	MIA PaCa2	D13_2	0.01	1_D13_2_27	S	8	-12	-120	-2	102.894	102.894	89.9628	1.14374
1	MIA PaCa2	D13_2	0.01	1_D13_2_27	S	9	-11	-110	-1.83333	104.331	104.331	88.8498	1.17424
1	MIA PaCa2	D13_2	0.01	1_D13_2_27	S	10	-10	-100	-1.66667	108.176	108.176	88.0257	1.22891
1	MIA PaCa2	D13_2	0.01	1_D13_2_27	S	11	-9	-90	-1.5	108.265	108.265	87.39	1.23887
1	MIA PaCa2	D13_2	0.01	1_D13_2_27	S	12	-8	-80	-1.33333	102.635	102.635	86.2825	1.18952
1	MIA PaCa2	D13_2	0.01	1_D13_2_27	S	13	-7	-70	-1.16667	95.8478	95.8478	84.872	1.12932
1	MIA PaCa2	D13_2	0.01	1_D13_2_27	S	14	-6	-60	-1	100.578	100.578	85.6506	1.17429
1	MIA PaCa2	D13_2	0.01	1_D13_2_27	S	15	-5	-50	-0.833333	96.2653	96.2653	84.1405	1.1441
1	MIA PaCa2	D13_2	0.01	1_D13_2_27	S	16	-4	-40	-0.666667	98.885	98.885	82.5286	1.19819
1	MIA PaCa2	D13_2	0.01	1_D13_2_27	S	17	-3	-30	-0.5	98.4621	98.4621	83.098	1.18489
1	MIA PaCa2	D13_2	0.01	1_D13_2_27	S	18	-2	-20	-0.333333	101.785	101.785	82.7797	1.22959
1	MIA PaCa2	D13_2	0.01	1_D13_2_27	S	19	-1	-10	-0.166667	96.8027	96.8027	82.0129	1.18034
1	MIA PaCa2	D13_2	0.01	1_D13_2_27	S	20	0	0	0	96.8449	96.8449	81.1847	1.1929
1	MIA PaCa2	D13_2	0.01	1_D13_2_27	S	21	1	10	0.166667	96.7775	96.7775	84.5183	1.14505
1	MIA PaCa2	D13_2	0.01	1_D13_2_27	S	22	2	20	0.333333	96.1792	96.1792	82.9015	1.16016
1	MIA PaCa2	D13_2	0.01	1_D13_2_27	S	23	3	30	0.5	95.927	95.927	82.0655	1.16891
1	MIA PaCa2	D13_2	0.01	1_D13_2_27	S	24	4	40	0.666667	96.5057	96.5057	80.9707	1.19186
1	MIA PaCa2	D13_2	0.01	1_D13_2_27	S	25	5	50	0.833333	98.5684	98.5684	80.691	1.22155
1	MIA PaCa2	D13_2	0.01	1_D13_2_27	S	26	6	60	1	99.7759	99.7759	79.6097	1.25331
1	MIA PaCa2	D13_2	0.01	1_D13_2_27	S	27	7	70	1.16667	100.035	100.035	79.1117	1.26448
1	MIA PaCa2	D13_2	0.01	1_D13_2_27	S	28	8	80	1.33333	101.528	101.528	78.0016	1.30161
1	MIA PaCa2	D13_2	0.01	1_D13_2_27	S	29	9	90	1.5	97.7371	97.7371	77.8528	1.25541
1	MIA PaCa2	D13_2	0.01	1_D13_2_27	S	30	10	100	1.66667	98.7647	98.7647	77.6698	1.2716
1	MIA PaCa2	D13_2	0.01	1_D13_2_27	S	31	11	110	1.83333	96.3152	96.3152	77.1169	1.24895
1	MIA PaCa2	D13_2	0.01	1_D13_2_27	S	32	12	120	2	96.022	96.022	76.7701	1.25077
1	MIA PaCa2	D13_2	0.01	1_D13_2_27	S	33	13	130	2.16667	97.7642	97.7642	75.9843	1.28664
1	MIA PaCa2	D13_2	0.01	1_D13_2_27	S	34	14	140	2.33333	95.6585	95.6585	75.0842	1.27402
1	MIA PaCa2	D13_2	0.01	1_D13_2_27	S	35	15	150	2.5	94.9146	94.9146	75.707	1.25371
1	MIA PaCa2	D13_2	0.01	1_D13_2_27	S	36	16	160	2.66667	88.1736	88.1736	74.2775	1.18708
1	MIA PaCa2	D13_2	0.01	1_D13_2_27	S	37	17	170	2.83333	88.3107	88.3107	73.2738	1.20521
1	MIA PaCa2	D13_2	0.01	1_D13_2_27	S	38	18	180	3	90.8795	90.8795	73.1743	1.24196
1	MIA PaCa2	D13_2	0.01	1_D13_2_27	S	39	19	190	3.16667	94.4144	94.4144	72.5019	1.30223
1	MIA PaCa2	D13_2	0.01	1_D13_2_27	S	40	20	200	3.33333	93.8017	93.8017	71.7669	1.30703
1	MIA PaCa2	D13_2	0.01	1_D13_2_27	S	41	21	210	3.5	89.0567	89.0567	72.0161	1.23662
1	MIA PaCa2	D13_2	0.01	1_D13_2_27	S	42	22	220	3.66667	90.3456	90.3456	71.8185	1.25797
1	MIA PaCa2	D13_2	0.01	1_D13_2_27	S	43	23	230	3.83333	88.022	88.022	71.1314	1.23746
1	MIA PaCa2	D13_2	0.01	1_D13_2_27	S	44	24	240	4	88.1313	88.1313	70.5922	1.24846
1	MIA PaCa2	D13_2	0.01	1_D13_2_27	S	45	25	250	4.16667	89.7367	89.7367	70.3088	1.27632
1	MIA PaCa2	D13_2	0.01	1_D13_2_27	S	46	26	260	4.33333	87.7826	87.7826	70.5953	1.24346
1	MIA PaCa2	D13_2	0.01	1_D13_2_27	S	47	27	270	4.5	89.1671	89.1671	70.0862	1.27225
1	MIA PaCa2	D13_2	0.01	1_D13_2_27	S	48	28	280	4.66667	88.848	88.848	69.4746	1.27886
1	MIA PaCa2	D13_2	0.01	1_D13_2_27	S	49	29	290	4.83333	91.7944	91.7944	68.6304	1.33752
1	MIA PaCa2	D13_2	0.01	1_D13_2_27	S	50	30	300	5	90.8251	90.8251	68.8548	1.31908
1	MIA PaCa2	D13_2	0.01	1_D13_2_27	S	51	31	310	5.16667	88.0853	88.0853	68.1679	1.29218
1	MIA PaCa2	D13_2	0.01	1_D13_2_27	S	52	32	320	5.33333	88.2257	88.2257	67.3507	1.30995
1	MIA PaCa2	D13_2	0.01	1_D13_2_27	S	53	33	330	5.5	83.7429	83.7429	67.9219	1.23293
1	MIA PaCa2	D13_2	0.01	1_D13_2_27	S	54	34	340	5.66667	86.5176	86.5176	68.0349	1.27166
1	MIA PaCa2	D13_2	0.01	1_D13_2_27	S	55	35	350	5.83333	85.8537	85.8537	68.887	1.2463
1	MIA PaCa2	D13_2	0.01	1_D13_2_27	S	56	36	360	6	83.2396	83.2396	68.1633	1.22118
1	MIA PaCa2	D13_2	0.01	1_D13_2_27	S	57	37	370	6.16667	85.7538	85.7538	67.2471	1.2752
1	MIA PaCa2	D13_2	0.01	1_D13_2_27	S	58	38	380	6.33333	85.1831	85.1831	67.1163	1.26919
1	MIA PaCa2	D13_2	0.01	1_D13_2_27	S	59	39	390	6.5	86.4534	86.4534	66.9979	1.29039
1	MIA PaCa2	D13_2	0.01	1_D13_2_27	S	60	40	400	6.66667	86.2823	86.2823	66.8466	1.29075
1	MIA PaCa2	D13_2	0.01	1_D13_2_27	S	61	41	410	6.83333	88.997	88.997	66.872	1.33086
1	MIA PaCa2	D13_2	0.01	1_D13_2_27	S	62	42	420	7	90.6054	90.6054	67.4151	1.34399
1	MIA PaCa2	D13_2	0.01	1_D13_2_27	S	63	43	430	7.16667	88.4174	88.4174	66.593	1.32773
1	MIA PaCa2	D13_2	0.01	1_D13_2_27	S	64	44	440	7.33333	87.5045	87.5045	64.9413	1.34744
1	MIA PaCa2	D13_2	0.01	1_D13_2_27	S	65	45	450	7.5	87.8433	87.8433	65.8821	1.33334
1	MIA PaCa2	D13_2	0.01	1_D13_2_27	S	66	46	460	7.66667	86.4082	86.4082	65.7717	1.31376
1	MIA PaCa2	D13_2	0.01	1_D13_2_27	S	67	47	470	7.83333	85.5096	85.5096	65.9693	1.2962
1	MIA PaCa2	D13_2	0.01	1_D13_2_28	S	0	-20	-200	-3.33333	118.618	118.618	102.696	1.15504
1	MIA PaCa2	D13_2	0.01	1_D13_2_28	S	1	-19	-190	-3.16667	112.772	112.772	98.9025	1.14023
1	MIA PaCa2	D13_2	0.01	1_D13_2_28	S	4	-16	-160	-2.66667	108.616	108.616	94.8279	1.1454
1	MIA PaCa2	D13_2	0.01	1_D13_2_28	S	5	-15	-150	-2.5	107.557	107.557	93.7282	1.14755
1	MIA PaCa2	D13_2	0.01	1_D13_2_28	S	6	-14	-140	-2.33333	106.916	106.916	91.2043	1.17227
1	MIA PaCa2	D13_2	0.01	1_D13_2_28	S	7	-13	-130	-2.16667	105.866	105.866	91.0398	1.16285
1	MIA PaCa2	D13_2	0.01	1_D13_2_28	S	8	-12	-120	-2	103.728	103.728	89.9628	1.15301
1	MIA PaCa2	D13_2	0.01	1_D13_2_28	S	9	-11	-110	-1.83333	109.652	109.652	88.8498	1.23412
1	MIA PaCa2	D13_2	0.01	1_D13_2_28	S	10	-10	-100	-1.66667	108.095	108.095	88.0257	1.22799
1	MIA PaCa2	D13_2	0.01	1_D13_2_28	S	11	-9	-90	-1.5	106.815	106.815	87.39	1.22228
1	MIA PaCa2	D13_2	0.01	1_D13_2_28	S	12	-8	-80	-1.33333	104.869	104.869	86.2825	1.21542
1	MIA PaCa2	D13_2	0.01	1_D13_2_28	S	13	-7	-70	-1.16667	104.039	104.039	84.872	1.22583
1	MIA PaCa2	D13_2	0.01	1_D13_2_28	S	14	-6	-60	-1	104.731	104.731	85.6506	1.22278
1	MIA PaCa2	D13_2	0.01	1_D13_2_28	S	15	-5	-50	-0.833333	107.012	107.012	84.1405	1.27182
1	MIA PaCa2	D13_2	0.01	1_D13_2_28	S	16	-4	-40	-0.666667	97.4009	97.4009	82.5286	1.18021
1	MIA PaCa2	D13_2	0.01	1_D13_2_28	S	17	-3	-30	-0.5	96.0195	96.0195	83.098	1.1555
1	MIA PaCa2	D13_2	0.01	1_D13_2_28	S	18	-2	-20	-0.333333	97.4156	97.4156	82.7797	1.17681
1	MIA PaCa2	D13_2	0.01	1_D13_2_28	S	19	-1	-10	-0.166667	88.9	88.9	82.0129	1.08398
1	MIA PaCa2	D13_2	0.01	1_D13_2_28	S	20	0	0	0	91.249	91.249	81.1847	1.12397
1	MIA PaCa2	D13_2	0.01	1_D13_2_28	S	21	1	10	0.166667	97.7539	97.7539	84.5183	1.1566
1	MIA PaCa2	D13_2	0.01	1_D13_2_28	S	22	2	20	0.333333	92.4173	92.4173	82.9015	1.11478
1	MIA PaCa2	D13_2	0.01	1_D13_2_28	S	23	3	30	0.5	93.052	93.052	82.0655	1.13387
1	MIA PaCa2	D13_2	0.01	1_D13_2_28	S	24	4	40	0.666667	87.3514	87.3514	80.9707	1.0788
1	MIA PaCa2	D13_2	0.01	1_D13_2_28	S	25	5	50	0.833333	88.738	88.738	80.691	1.09973
1	MIA PaCa2	D13_2	0.01	1_D13_2_28	S	26	6	60	1	93.2885	93.2885	79.6097	1.17182
1	MIA PaCa2	D13_2	0.01	1_D13_2_28	S	27	7	70	1.16667	89.8731	89.8731	79.1117	1.13603
1	MIA PaCa2	D13_2	0.01	1_D13_2_28	S	28	8	80	1.33333	86.969	86.969	78.0016	1.11496
1	MIA PaCa2	D13_2	0.01	1_D13_2_28	S	29	9	90	1.5	83.2147	83.2147	77.8528	1.06887
1	MIA PaCa2	D13_2	0.01	1_D13_2_28	S	30	10	100	1.66667	84.2981	84.2981	77.6698	1.08534
1	MIA PaCa2	D13_2	0.01	1_D13_2_28	S	31	11	110	1.83333	82.6076	82.6076	77.1169	1.0712
1	MIA PaCa2	D13_2	0.01	1_D13_2_28	S	32	12	120	2	82.8944	82.8944	76.7701	1.07977
1	MIA PaCa2	D13_2	0.01	1_D13_2_28	S	33	13	130	2.16667	84.3654	84.3654	75.9843	1.1103
1	MIA PaCa2	D13_2	0.01	1_D13_2_28	S	34	14	140	2.33333	82.1314	82.1314	75.0842	1.09386
1	MIA PaCa2	D13_2	0.01	1_D13_2_28	S	35	15	150	2.5	81.0533	81.0533	75.707	1.07062
1	MIA PaCa2	D13_2	0.01	1_D13_2_28	S	36	16	160	2.66667	78.4663	78.4663	74.2775	1.05639
1	MIA PaCa2	D13_2	0.01	1_D13_2_28	S	37	17	170	2.83333	78.8313	78.8313	73.2738	1.07584
1	MIA PaCa2	D13_2	0.01	1_D13_2_28	S	38	18	180	3	77.7994	77.7994	73.1743	1.06321
1	MIA PaCa2	D13_2	0.01	1_D13_2_28	S	39	19	190	3.16667	76.9248	76.9248	72.5019	1.061
1	MIA PaCa2	D13_2	0.01	1_D13_2_28	S	40	20	200	3.33333	76.4338	76.4338	71.7669	1.06503
1	MIA PaCa2	D13_2	0.01	1_D13_2_28	S	41	21	210	3.5	75.1506	75.1506	72.0161	1.04352
1	MIA PaCa2	D13_2	0.01	1_D13_2_28	S	42	22	220	3.66667	76.3468	76.3468	71.8185	1.06305
1	MIA PaCa2	D13_2	0.01	1_D13_2_28	S	43	23	230	3.83333	74.7575	74.7575	71.1314	1.05098
1	MIA PaCa2	D13_2	0.01	1_D13_2_28	S	44	24	240	4	72.6411	72.6411	70.5922	1.02902
1	MIA PaCa2	D13_2	0.01	1_D13_2_28	S	45	25	250	4.16667	71.7308	71.7308	70.3088	1.02022
1	MIA PaCa2	D13_2	0.01	1_D13_2_28	S	46	26	260	4.33333	72.0057	72.0057	70.5953	1.01998
1	MIA PaCa2	D13_2	0.01	1_D13_2_28	S	47	27	270	4.5	75.3879	75.3879	70.0862	1.07565
1	MIA PaCa2	D13_2	0.01	1_D13_2_28	S	48	28	280	4.66667	73.6011	73.6011	69.4746	1.0594
1	MIA PaCa2	D13_2	0.01	1_D13_2_28	S	49	29	290	4.83333	71.1074	71.1074	68.6304	1.03609
1	MIA PaCa2	D13_2	0.01	1_D13_2_28	S	50	30	300	5	70.1934	70.1934	68.8548	1.01944
1	MIA PaCa2	D13_2	0.01	1_D13_2_28	S	51	31	310	5.16667	71.3198	71.3198	68.1679	1.04624
1	MIA PaCa2	D13_2	0.01	1_D13_2_28	S	52	32	320	5.33333	69.824	69.824	67.3507	1.03672
1	MIA PaCa2	D13_2	0.01	1_D13_2_28	S	53	33	330	5.5	72.8701	72.8701	67.9219	1.07285
1	MIA PaCa2	D13_2	0.01	1_D13_2_28	S	54	34	340	5.66667	73.169	73.169	68.0349	1.07546
1	MIA PaCa2	D13_2	0.01	1_D13_2_28	S	55	35	350	5.83333	74.1866	74.1866	68.887	1.07693
1	MIA PaCa2	D13_2	0.01	1_D13_2_28	S	56	36	360	6	70.9619	70.9619	68.1633	1.04106
1	MIA PaCa2	D13_2	0.01	1_D13_2_28	S	57	37	370	6.16667	73.7428	73.7428	67.2471	1.09659
1	MIA PaCa2	D13_2	0.01	1_D13_2_28	S	58	38	380	6.33333	71.1145	71.1145	67.1163	1.05957
1	MIA PaCa2	D13_2	0.01	1_D13_2_28	S	59	39	390	6.5	71.8994	71.8994	66.9979	1.07316
1	MIA PaCa2	D13_2	0.01	1_D13_2_28	S	60	40	400	6.66667	70.5764	70.5764	66.8466	1.0558
1	MIA PaCa2	D13_2	0.01	1_D13_2_28	S	61	41	410	6.83333	70.1617	70.1617	66.872	1.04919
1	MIA PaCa2	D13_2	0.01	1_D13_2_28	S	62	42	420	7	72.0469	72.0469	67.4151	1.06871
1	MIA PaCa2	D13_2	0.01	1_D13_2_28	S	63	43	430	7.16667	69.4425	69.4425	66.593	1.04279
1	MIA PaCa2	D13_2	0.01	1_D13_2_28	S	64	44	440	7.33333	67.5135	67.5135	64.9413	1.03961
1	MIA PaCa2	D13_2	0.01	1_D13_2_28	S	65	45	450	7.5	69.0312	69.0312	65.8821	1.0478
1	MIA PaCa2	D13_2	0.01	1_D13_2_28	S	66	46	460	7.66667	68.7115	68.7115	65.7717	1.0447
1	MIA PaCa2	D13_2	0.01	1_D13_2_28	S	67	47	470	7.83333	69.7741	69.7741	65.9693	1.05768
1	MIA PaCa2	D13_2	0.01	1_D13_2_28	S	68	48	480	8	70.9567	70.9567	65.2461	1.08752
1	MIA PaCa2	D13_2	0.01	1_D13_2_28	S	69	49	490	8.16667	70.3474	70.3474	64.9541	1.08303
1	MIA PaCa2	D13_2	0.01	1_D13_2_28	S	70	50	500	8.33333	67.0689	67.0689	64.7238	1.03623
1	MIA PaCa2	D13_2	0.01	1_D13_2_28	S	71	51	510	8.5	66.3391	66.3391	64.8745	1.02258
1	MIA PaCa2	D13_2	0.01	1_D13_2_28	S	72	52	520	8.66667	67.288	67.288	65.0075	1.03508
1	MIA PaCa2	D13_2	0.01	1_D13_2_28	S	73	53	530	8.83333	75.0181	75.0181	64.3036	1.16662
1	MIA PaCa2	D13_2	0.01	1_D13_2_40	S	0	-20	-200	-3.33333	112.616	112.616	102.696	1.0966
1	MIA PaCa2	D13_2	0.01	1_D13_2_40	S	1	-19	-190	-3.16667	103.845	103.845	98.9025	1.04997
1	MIA PaCa2	D13_2	0.01	1_D13_2_40	S	4	-16	-160	-2.66667	97.8327	97.8327	94.8279	1.03169
1	MIA PaCa2	D13_2	0.01	1_D13_2_40	S	5	-15	-150	-2.5	96.569	96.569	93.7282	1.03031
1	MIA PaCa2	D13_2	0.01	1_D13_2_40	S	6	-14	-140	-2.33333	102.473	102.473	91.2043	1.12355
1	MIA PaCa2	D13_2	0.01	1_D13_2_40	S	7	-13	-130	-2.16667	104.729	104.729	91.0398	1.15036
1	MIA PaCa2	D13_2	0.01	1_D13_2_40	S	8	-12	-120	-2	97.1538	97.1538	89.9628	1.07993
1	MIA PaCa2	D13_2	0.01	1_D13_2_40	S	9	-11	-110	-1.83333	95.2817	95.2817	88.8498	1.07239
1	MIA PaCa2	D13_2	0.01	1_D13_2_40	S	10	-10	-100	-1.66667	97.6179	97.6179	88.0257	1.10897
1	MIA PaCa2	D13_2	0.01	1_D13_2_40	S	11	-9	-90	-1.5	98.1924	98.1924	87.39	1.12361
1	MIA PaCa2	D13_2	0.01	1_D13_2_40	S	12	-8	-80	-1.33333	96.2492	96.2492	86.2825	1.11551
1	MIA PaCa2	D13_2	0.01	1_D13_2_40	S	13	-7	-70	-1.16667	97.1994	97.1994	84.872	1.14525
1	MIA PaCa2	D13_2	0.01	1_D13_2_40	S	14	-6	-60	-1	89.4444	89.4444	85.6506	1.04429
1	MIA PaCa2	D13_2	0.01	1_D13_2_40	S	15	-5	-50	-0.833333	91.418	91.418	84.1405	1.08649
1	MIA PaCa2	D13_2	0.01	1_D13_2_40	S	16	-4	-40	-0.666667	87.9071	87.9071	82.5286	1.06517
1	MIA PaCa2	D13_2	0.01	1_D13_2_40	S	17	-3	-30	-0.5	90.8608	90.8608	83.098	1.09342
1	MIA PaCa2	D13_2	0.01	1_D13_2_40	S	18	-2	-20	-0.333333	97.4536	97.4536	82.7797	1.17726
1	MIA PaCa2	D13_2	0.01	1_D13_2_40	S	19	-1	-10	-0.166667	97.4411	97.4411	82.0129	1.18812
1	MIA PaCa2	D13_2	0.01	1_D13_2_40	S	20	0	0	0	90.7078	90.7078	81.1847	1.1173
1	MIA PaCa2	D13_2	0.01	1_D13_2_40	S	21	1	10	0.166667	93.6798	93.6798	84.5183	1.1084
1	MIA PaCa2	D13_2	0.01	1_D13_2_40	S	22	2	20	0.333333	92.4833	92.4833	82.9015	1.11558
1	MIA PaCa2	D13_2	0.01	1_D13_2_40	S	23	3	30	0.5	85.8179	85.8179	82.0655	1.04572
1	MIA PaCa2	D13_2	0.01	1_D13_2_40	S	24	4	40	0.666667	85.3343	85.3343	80.9707	1.05389
1	MIA PaCa2	D13_2	0.01	1_D13_2_40	S	25	5	50	0.833333	84.9938	84.9938	80.691	1.05332
1	MIA PaCa2	D13_2	0.01	1_D13_2_40	S	26	6	60	1	86.4189	86.4189	79.6097	1.08553
1	MIA PaCa2	D13_2	0.01	1_D13_2_40	S	27	7	70	1.16667	88.5385	88.5385	79.1117	1.11916
1	MIA PaCa2	D13_2	0.01	1_D13_2_40	S	28	8	80	1.33333	91.5111	91.5111	78.0016	1.1732
1	MIA PaCa2	D13_2	0.01	1_D13_2_40	S	29	9	90	1.5	88.1043	88.1043	77.8528	1.13168
1	MIA PaCa2	D13_2	0.01	1_D13_2_40	S	30	10	100	1.66667	85.4972	85.4972	77.6698	1.10078
1	MIA PaCa2	D13_2	0.01	1_D13_2_40	S	31	11	110	1.83333	82.8584	82.8584	77.1169	1.07445
1	MIA PaCa2	D13_2	0.01	1_D13_2_40	S	32	12	120	2	83.0536	83.0536	76.7701	1.08185
1	MIA PaCa2	D13_2	0.01	1_D13_2_40	S	33	13	130	2.16667	87.7749	87.7749	75.9843	1.15517
1	MIA PaCa2	D13_2	0.01	1_D13_2_40	S	34	14	140	2.33333	85.1823	85.1823	75.0842	1.13449
1	MIA PaCa2	D13_2	0.01	1_D13_2_40	S	35	15	150	2.5	86.4829	86.4829	75.707	1.14234
1	MIA PaCa2	D13_2	0.01	1_D13_2_40	S	36	16	160	2.66667	84.3816	84.3816	74.2775	1.13603
1	MIA PaCa2	D13_2	0.01	1_D13_2_40	S	37	17	170	2.83333	81.6452	81.6452	73.2738	1.11425
1	MIA PaCa2	D13_2	0.01	1_D13_2_40	S	38	18	180	3	83.3553	83.3553	73.1743	1.13913
1	MIA PaCa2	D13_2	0.01	1_D13_2_40	S	39	19	190	3.16667	81.1846	81.1846	72.5019	1.11976
1	MIA PaCa2	D13_2	0.01	1_D13_2_40	S	40	20	200	3.33333	81.4635	81.4635	71.7669	1.13511
1	MIA PaCa2	D13_2	0.01	1_D13_2_40	S	41	21	210	3.5	81.2725	81.2725	72.0161	1.12853
1	MIA PaCa2	D13_2	0.01	1_D13_2_40	S	42	22	220	3.66667	81.4318	81.4318	71.8185	1.13386
1	MIA PaCa2	D13_2	0.01	1_D13_2_40	S	43	23	230	3.83333	79.9462	79.9462	71.1314	1.12392
1	MIA PaCa2	D13_2	0.01	1_D13_2_40	S	44	24	240	4	80.8118	80.8118	70.5922	1.14477
1	MIA PaCa2	D13_2	0.01	1_D13_2_40	S	45	25	250	4.16667	79.2546	79.2546	70.3088	1.12724
1	MIA PaCa2	D13_2	0.01	1_D13_2_40	S	46	26	260	4.33333	74.8794	74.8794	70.5953	1.06069
1	MIA PaCa2	D13_2	0.01	1_D13_2_40	S	47	27	270	4.5	76.385	76.385	70.0862	1.08987
1	MIA PaCa2	D13_2	0.01	1_D13_2_40	S	48	28	280	4.66667	78.1711	78.1711	69.4746	1.12517
1	MIA PaCa2	D13_2	0.01	1_D13_2_40	S	49	29	290	4.83333	76.2691	76.2691	68.6304	1.1113
1	MIA PaCa2	D13_2	0.01	1_D13_2_40	S	50	30	300	5	78.2537	78.2537	68.8548	1.1365
1	MIA PaCa2	D13_2	0.01	1_D13_2_40	S	51	31	310	5.16667	74.0815	74.0815	68.1679	1.08675
1	MIA PaCa2	D13_2	0.01	1_D13_2_40	S	52	32	320	5.33333	73.7584	73.7584	67.3507	1.09514
1	MIA PaCa2	D13_2	0.01	1_D13_2_40	S	53	33	330	5.5	76.633	76.633	67.9219	1.12825
1	MIA PaCa2	D13_2	0.01	1_D13_2_40	S	54	34	340	5.66667	77.5341	77.5341	68.0349	1.13962
1	MIA PaCa2	D13_2	0.01	1_D13_2_40	S	55	35	350	5.83333	78.1114	78.1114	68.887	1.13391
1	MIA PaCa2	D13_2	0.01	1_D13_2_40	S	56	36	360	6	72.2529	72.2529	68.1633	1.06
1	MIA PaCa2	D13_2	0.01	1_D13_2_40	S	57	37	370	6.16667	74.8045	74.8045	67.2471	1.11238
1	MIA PaCa2	D13_2	0.01	1_D13_2_40	S	58	38	380	6.33333	76.1008	76.1008	67.1163	1.13387
1	MIA PaCa2	D13_2	0.01	1_D13_2_40	S	59	39	390	6.5	76.24	76.24	66.9979	1.13795
1	MIA PaCa2	D13_2	0.01	1_D13_2_40	S	60	40	400	6.66667	78.4055	78.4055	66.8466	1.17292
1	MIA PaCa2	D13_2	0.01	1_D13_2_40	S	61	41	410	6.83333	77.6309	77.6309	66.872	1.16089
1	MIA PaCa2	D13_2	0.01	1_D13_2_40	S	62	42	420	7	79.6903	79.6903	67.4151	1.18208
1	MIA PaCa2	D13_2	0.01	1_D13_2_40	S	63	43	430	7.16667	78.7082	78.7082	66.593	1.18193
1	MIA PaCa2	D13_2	0.01	1_D13_2_40	S	64	44	440	7.33333	78.5294	78.5294	64.9413	1.20924
1	MIA PaCa2	D13_2	0.01	1_D13_2_40	S	65	45	450	7.5	79.9564	79.9564	65.8821	1.21363
1	MIA PaCa2	D13_2	0.01	1_D13_2_40	S	66	46	460	7.66667	79.9235	79.9235	65.7717	1.21517
1	MIA PaCa2	D13_2	0.01	1_D13_2_40	S	67	47	470	7.83333	82.1205	82.1205	65.9693	1.24483
1	MIA PaCa2	D13_2	0.01	1_D13_2_40	S	68	48	480	8	80.0432	80.0432	65.2461	1.22679
1	MIA PaCa2	D13_2	0.01	1_D13_2_40	S	69	49	490	8.16667	80.0029	80.0029	64.9541	1.23168
1	MIA PaCa2	D13_2	0.01	1_D13_2_40	S	70	50	500	8.33333	77.1126	77.1126	64.7238	1.19141
1	MIA PaCa2	D13_2	0.01	1_D13_2_40	S	71	51	510	8.5	79.7529	79.7529	64.8745	1.22934
1	MIA PaCa2	D13_2	0.01	1_D13_2_40	S	72	52	520	8.66667	78.4478	78.4478	65.0075	1.20675
1	MIA PaCa2	D13_2	0.01	1_D13_2_40	S	73	53	530	8.83333	82.4068	82.4068	64.3036	1.28153
1	MIA PaCa2	D13_2	0.01	1_D13_2_40	S	74	54	540	9	83.3644	83.3644	64.0165	1.30223
1	MIA PaCa2	D13_2	0.01	1_D13_2_40	S	75	55	550	9.16667	81.3814	81.3814	64.712	1.25759
1	MIA PaCa2	D13_2	0.01	1_D13_2_40	S	76	56	560	9.33333	80.1825	80.1825	64.0422	1.25203
1	MIA PaCa2	D13_3	0.01	1_D13_3_19	G2	1	-19	-190	-3.16667	97.5085	97.5085	98.9025	0.985906
1	MIA PaCa2	D13_3	0.01	1_D13_3_19	G2	2	-18	-180	-3	97.2748	97.2748	98.287	0.989701
1	MIA PaCa2	D13_3	0.01	1_D13_3_19	G2	3	-17	-170	-2.83333	93.1145	93.1145	95.5639	0.974369
1	MIA PaCa2	D13_3	0.01	1_D13_3_19	G2	4	-16	-160	-2.66667	90.9135	90.9135	94.8279	0.958721
1	MIA PaCa2	D13_3	0.01	1_D13_3_19	G2	5	-15	-150	-2.5	90.9923	90.9923	93.7282	0.970811
1	MIA PaCa2	D13_3	0.01	1_D13_3_19	G2	6	-14	-140	-2.33333	85.9926	85.9926	91.2043	0.942857
1	MIA PaCa2	D13_3	0.01	1_D13_3_19	G2	7	-13	-130	-2.16667	84.708	84.708	91.0398	0.930451
1	MIA PaCa2	D13_3	0.01	1_D13_3_19	G2	8	-12	-120	-2	84.02	84.02	89.9628	0.933942
1	MIA PaCa2	D13_3	0.01	1_D13_3_19	G2	9	-11	-110	-1.83333	84.278	84.278	88.8498	0.948545
1	MIA PaCa2	D13_3	0.01	1_D13_3_19	G2	10	-10	-100	-1.66667	84.7854	84.7854	88.0257	0.963189
1	MIA PaCa2	D13_3	0.01	1_D13_3_19	G2	11	-9	-90	-1.5	89.3619	89.3619	87.39	1.02256
1	MIA PaCa2	D13_3	0.01	1_D13_3_19	G2	12	-8	-80	-1.33333	84.9139	84.9139	86.2825	0.984138
1	MIA PaCa2	D13_3	0.01	1_D13_3_19	G2	13	-7	-70	-1.16667	83.7102	83.7102	84.872	0.986311
1	MIA PaCa2	D13_3	0.01	1_D13_3_19	G2	14	-6	-60	-1	86.751	86.751	85.6506	1.01285
1	MIA PaCa2	D13_3	0.01	1_D13_3_19	G2	15	-5	-50	-0.833333	83.6509	83.6509	84.1405	0.994182
1	MIA PaCa2	D13_3	0.01	1_D13_3_19	G2	16	-4	-40	-0.666667	81.992	81.992	82.5286	0.993499
1	MIA PaCa2	D13_3	0.01	1_D13_3_19	G2	17	-3	-30	-0.5	83.7984	83.7984	83.098	1.00843
1	MIA PaCa2	D13_3	0.01	1_D13_3_19	G2	18	-2	-20	-0.333333	85.7796	85.7796	82.7797	1.03624
1	MIA PaCa2	D13_3	0.01	1_D13_3_19	G2	19	-1	-10	-0.166667	83.0042	83.0042	82.0129	1.01209
1	MIA PaCa2	D13_3	0.01	1_D13_3_19	G2	20	0	0	0	82.9256	82.9256	81.1847	1.02144
1	MIA PaCa2	D13_3	0.01	1_D13_3_19	G2	21	1	10	0.166667	93.875	93.875	84.5183	1.11071
1	MIA PaCa2	D13_3	0.01	1_D13_3_19	G2	22	2	20	0.333333	89.581	89.581	82.9015	1.08057
1	MIA PaCa2	D13_3	0.01	1_D13_3_19	G2	23	3	30	0.5	94.0796	94.0796	82.0655	1.1464
1	MIA PaCa2	D13_3	0.01	1_D13_3_19	G2	24	4	40	0.666667	96.0897	96.0897	80.9707	1.18672
1	MIA PaCa2	D13_3	0.01	1_D13_3_19	G2	25	5	50	0.833333	95.0548	95.0548	80.691	1.17801
1	MIA PaCa2	D13_3	0.01	1_D13_3_19	G2	26	6	60	1	97.3859	97.3859	79.6097	1.22329
1	MIA PaCa2	D13_3	0.01	1_D13_3_21	S	1	-19	-190	-3.16667	102.469	102.469	98.9025	1.03606
1	MIA PaCa2	D13_3	0.01	1_D13_3_21	S	2	-18	-180	-3	101.024	101.024	98.287	1.02785
1	MIA PaCa2	D13_3	0.01	1_D13_3_21	S	3	-17	-170	-2.83333	97.6206	97.6206	95.5639	1.02152
1	MIA PaCa2	D13_3	0.01	1_D13_3_21	S	4	-16	-160	-2.66667	99.9049	99.9049	94.8279	1.05354
1	MIA PaCa2	D13_3	0.01	1_D13_3_21	S	5	-15	-150	-2.5	98.6049	98.6049	93.7282	1.05203
1	MIA PaCa2	D13_3	0.01	1_D13_3_21	S	6	-14	-140	-2.33333	99.3147	99.3147	91.2043	1.08893
1	MIA PaCa2	D13_3	0.01	1_D13_3_21	S	7	-13	-130	-2.16667	93.2618	93.2618	91.0398	1.02441
1	MIA PaCa2	D13_3	0.01	1_D13_3_21	S	8	-12	-120	-2	91.5415	91.5415	89.9628	1.01755
1	MIA PaCa2	D13_3	0.01	1_D13_3_21	S	9	-11	-110	-1.83333	89.9152	89.9152	88.8498	1.01199
1	MIA PaCa2	D13_3	0.01	1_D13_3_21	S	10	-10	-100	-1.66667	91.1488	91.1488	88.0257	1.03548
1	MIA PaCa2	D13_3	0.01	1_D13_3_21	S	11	-9	-90	-1.5	89.5409	89.5409	87.39	1.02461
1	MIA PaCa2	D13_3	0.01	1_D13_3_21	S	12	-8	-80	-1.33333	87.616	87.616	86.2825	1.01545
1	MIA PaCa2	D13_3	0.01	1_D13_3_21	S	13	-7	-70	-1.16667	86.2366	86.2366	84.872	1.01608
1	MIA PaCa2	D13_3	0.01	1_D13_3_21	S	14	-6	-60	-1	87.0294	87.0294	85.6506	1.0161
1	MIA PaCa2	D13_3	0.01	1_D13_3_21	S	15	-5	-50	-0.833333	86.8383	86.8383	84.1405	1.03206
1	MIA PaCa2	D13_3	0.01	1_D13_3_21	S	16	-4	-40	-0.666667	84.0535	84.0535	82.5286	1.01848
1	MIA PaCa2	D13_3	0.01	1_D13_3_21	S	17	-3	-30	-0.5	79.2675	79.2675	83.098	0.953904
1	MIA PaCa2	D13_3	0.01	1_D13_3_21	S	18	-2	-20	-0.333333	83.5108	83.5108	82.7797	1.00883
1	MIA PaCa2	D13_3	0.01	1_D13_3_21	S	19	-1	-10	-0.166667	82.7266	82.7266	82.0129	1.0087
1	MIA PaCa2	D13_3	0.01	1_D13_3_21	S	20	0	0	0	81.6491	81.6491	81.1847	1.00572
1	MIA PaCa2	D13_3	0.01	1_D13_3_21	S	21	1	10	0.166667	83.0276	83.0276	84.5183	0.982362
1	MIA PaCa2	D13_3	0.01	1_D13_3_21	S	22	2	20	0.333333	90.3855	90.3855	82.9015	1.09028
1	MIA PaCa2	D13_3	0.01	1_D13_3_21	S	23	3	30	0.5	93.8182	93.8182	82.0655	1.14321
1	MIA PaCa2	D13_3	0.01	1_D13_3_21	S	24	4	40	0.666667	96.1958	96.1958	80.9707	1.18803
1	MIA PaCa2	D13_3	0.01	1_D13_3_21	S	25	5	50	0.833333	92.6926	92.6926	80.691	1.14874
1	MIA PaCa2	D13_3	0.01	1_D13_3_21	S	26	6	60	1	92.0936	92.0936	79.6097	1.15681
1	MIA PaCa2	D13_3	0.01	1_D13_3_21	S	27	7	70	1.16667	86.7143	86.7143	79.1117	1.0961
1	MIA PaCa2	D13_3	0.01	1_D13_3_21	S	28	8	80	1.33333	84.0836	84.0836	78.0016	1.07797
1	MIA PaCa2	D13_3	0.01	1_D13_3_21	S	29	9	90	1.5	83.5479	83.5479	77.8528	1.07315
1	MIA PaCa2	D13_3	0.01	1_D13_3_21	S	30	10	100	1.66667	85.1923	85.1923	77.6698	1.09685
1	MIA PaCa2	D13_3	0.01	1_D13_3_21	S	31	11	110	1.83333	85.712	85.712	77.1169	1.11145
1	MIA PaCa2	D13_3	0.01	1_D13_3_21	S	32	12	120	2	84.1289	84.1289	76.7701	1.09586
1	MIA PaCa2	D13_3	0.01	1_D13_3_21	S	33	13	130	2.16667	84.774	84.774	75.9843	1.11568
1	MIA PaCa2	D13_3	0.01	1_D13_3_21	S	34	14	140	2.33333	82.8602	82.8602	75.0842	1.10356
1	MIA PaCa2	D13_3	0.01	1_D13_3_21	S	35	15	150	2.5	82.1254	82.1254	75.707	1.08478
1	MIA PaCa2	D13_3	0.01	1_D13_3_21	S	36	16	160	2.66667	81.8249	81.8249	74.2775	1.10161
1	MIA PaCa2	D13_3	0.01	1_D13_3_21	S	37	17	170	2.83333	80.7982	80.7982	73.2738	1.10269
1	MIA PaCa2	D13_3	0.01	1_D13_3_21	S	38	18	180	3	83.6314	83.6314	73.1743	1.14291
1	MIA PaCa2	D13_3	0.01	1_D13_3_21	S	39	19	190	3.16667	82.9667	82.9667	72.5019	1.14434
1	MIA PaCa2	D13_3	0.01	1_D13_3_21	S	40	20	200	3.33333	81.0812	81.0812	71.7669	1.12979
1	MIA PaCa2	D13_3	0.01	1_D13_3_21	S	41	21	210	3.5	81.1743	81.1743	72.0161	1.12717
1	MIA PaCa2	D13_3	0.01	1_D13_3_21	S	42	22	220	3.66667	80.4126	80.4126	71.8185	1.11966
1	MIA PaCa2	D13_3	0.01	1_D13_3_21	S	43	23	230	3.83333	78.4212	78.4212	71.1314	1.10248
1	MIA PaCa2	D13_3	0.01	1_D13_3_21	S	44	24	240	4	77.9461	77.9461	70.5922	1.10417
1	MIA PaCa2	D13_3	0.01	1_D13_3_21	S	45	25	250	4.16667	78.4755	78.4755	70.3088	1.11615
1	MIA PaCa2	D13_3	0.01	1_D13_3_21	S	46	26	260	4.33333	80.8824	80.8824	70.5953	1.14572
1	MIA PaCa2	D13_3	0.01	1_D13_3_21	S	47	27	270	4.5	83.8412	83.8412	70.0862	1.19626
1	MIA PaCa2	D13_3	0.01	1_D13_3_21	S	48	28	280	4.66667	81.1361	81.1361	69.4746	1.16785
1	MIA PaCa2	D13_3	0.01	1_D13_3_21	S	49	29	290	4.83333	80.3657	80.3657	68.6304	1.17099
1	MIA PaCa2	D13_3	0.01	1_D13_3_21	S	50	30	300	5	82.4841	82.4841	68.8548	1.19794
1	MIA PaCa2	D13_3	0.01	1_D13_3_21	S	51	31	310	5.16667	79.7245	79.7245	68.1679	1.16953
1	MIA PaCa2	D13_3	0.01	1_D13_3_21	S	52	32	320	5.33333	77.5474	77.5474	67.3507	1.1514
1	MIA PaCa2	D13_3	0.01	1_D13_3_21	S	53	33	330	5.5	79	79	67.9219	1.1631
1	MIA PaCa2	D13_3	0.01	1_D13_3_21	S	54	34	340	5.66667	78.9561	78.9561	68.0349	1.16052
1	MIA PaCa2	D13_3	0.01	1_D13_3_21	S	55	35	350	5.83333	81.202	81.202	68.887	1.17877
1	MIA PaCa2	D13_3	0.01	1_D13_3_21	S	56	36	360	6	81.2732	81.2732	68.1633	1.19233
1	MIA PaCa2	D13_3	0.01	1_D13_3_21	S	57	37	370	6.16667	77.9812	77.9812	67.2471	1.15962
1	MIA PaCa2	D13_3	0.01	1_D13_3_21	S	58	38	380	6.33333	76.6872	76.6872	67.1163	1.1426
1	MIA PaCa2	D13_3	0.01	1_D13_3_21	S	59	39	390	6.5	76.9796	76.9796	66.9979	1.14899
1	MIA PaCa2	D13_3	0.01	1_D13_3_21	S	60	40	400	6.66667	78.0339	78.0339	66.8466	1.16736
1	MIA PaCa2	D13_3	0.01	1_D13_3_21	S	61	41	410	6.83333	84.2689	84.2689	66.872	1.26015
1	MIA PaCa2	D13_3	0.01	1_D13_3_21	S	62	42	420	7	78.2885	78.2885	67.4151	1.16129
1	MIA PaCa2	D13_3	0.01	1_D13_3_86	G1	15	-5	-50	-0.833333	87.0304	87.0304	84.1405	1.03435
1	MIA PaCa2	D13_3	0.01	1_D13_3_86	G1	16	-4	-40	-0.666667	84.3905	84.3905	82.5286	1.02256
1	MIA PaCa2	D13_3	0.01	1_D13_3_86	G1	17	-3	-30	-0.5	85.5091	85.5091	83.098	1.02902
1	MIA PaCa2	D13_3	0.01	1_D13_3_86	G1	18	-2	-20	-0.333333	79.984	79.984	82.7797	0.966227
1	MIA PaCa2	D13_3	0.01	1_D13_3_86	G1	19	-1	-10	-0.166667	80.1242	80.1242	82.0129	0.976971
1	MIA PaCa2	D13_3	0.01	1_D13_3_86	G1	20	0	0	0	79.9514	79.9514	81.1847	0.984808
1	MIA PaCa2	D13_3	0.01	1_D13_3_86	G1	21	1	10	0.166667	86.6174	86.6174	84.5183	1.02484
1	MIA PaCa2	D13_3	0.01	1_D13_3_86	G1	22	2	20	0.333333	84.0182	84.0182	82.9015	1.01347
1	MIA PaCa2	D13_3	0.01	1_D13_3_86	G1	23	3	30	0.5	85.2006	85.2006	82.0655	1.0382
1	MIA PaCa2	D13_3	0.01	1_D13_3_86	G1	24	4	40	0.666667	85.7316	85.7316	80.9707	1.0588
1	MIA PaCa2	D13_3	0.01	1_D13_3_86	G1	25	5	50	0.833333	87.281	87.281	80.691	1.08167
1	MIA PaCa2	D13_3	0.01	1_D13_3_86	G1	26	6	60	1	89.3246	89.3246	79.6097	1.12203
1	MIA PaCa2	D13_3	0.01	1_D13_3_86	G1	27	7	70	1.16667	90.8135	90.8135	79.1117	1.14792
1	MIA PaCa2	D13_3	0.01	1_D13_3_86	G1	28	8	80	1.33333	85.7534	85.7534	78.0016	1.09938
1	MIA PaCa2	D13_3	0.01	1_D13_3_86	G1	29	9	90	1.5	84.5993	84.5993	77.8528	1.08666
1	MIA PaCa2	D13_3	0.01	1_D13_3_86	G1	30	10	100	1.66667	85.25	85.25	77.6698	1.09759
1	MIA PaCa2	D13_3	0.01	1_D13_3_86	G1	31	11	110	1.83333	83.4	83.4	77.1169	1.08147
1	MIA PaCa2	D13_3	0.01	1_D13_3_86	G1	32	12	120	2	80.7443	80.7443	76.7701	1.05177
1	MIA PaCa2	D13_3	0.01	1_D13_3_86	G1	33	13	130	2.16667	79.4327	79.4327	75.9843	1.04538
1	MIA PaCa2	D13_3	0.01	1_D13_3_86	G1	34	14	140	2.33333	79.3746	79.3746	75.0842	1.05714
1	MIA PaCa2	D13_3	0.01	1_D13_3_86	G1	35	15	150	2.5	78.982	78.982	75.707	1.04326
1	MIA PaCa2	D13_3	0.01	1_D13_3_86	G1	36	16	160	2.66667	78.6431	78.6431	74.2775	1.05877
1	MIA PaCa2	D13_3	0.01	1_D13_3_86	G1	37	17	170	2.83333	76.375	76.375	73.2738	1.04232
1	MIA PaCa2	D13_3	0.01	1_D13_3_86	G1	38	18	180	3	80.6902	80.6902	73.1743	1.10271
1	MIA PaCa2	D13_3	0.01	1_D13_3_86	G1	39	19	190	3.16667	80.9076	80.9076	72.5019	1.11594
1	MIA PaCa2	D13_3	0.01	1_D13_3_86	G1	40	20	200	3.33333	81.8993	81.8993	71.7669	1.14119
1	MIA PaCa2	D13_3	0.01	1_D13_3_86	G1	41	21	210	3.5	83.0164	83.0164	72.0161	1.15275
1	MIA PaCa2	D13_3	0.01	1_D13_3_86	G1	42	22	220	3.66667	82.8245	82.8245	71.8185	1.15325
1	MIA PaCa2	D13_3	0.01	1_D13_3_86	G1	43	23	230	3.83333	82.7796	82.7796	71.1314	1.16376
1	MIA PaCa2	D13_3	0.01	1_D13_3_86	G1	44	24	240	4	81.3438	81.3438	70.5922	1.15231
1	MIA PaCa2	D13_3	0.01	1_D13_3_86	G1	45	25	250	4.16667	82.2182	82.2182	70.3088	1.16939
1	MIA PaCa2	D13_3	0.01	1_D13_3_86	G1	46	26	260	4.33333	80.375	80.375	70.5953	1.13853
1	MIA PaCa2	D13_3	0.01	1_D13_3_86	G1	47	27	270	4.5	75.4773	75.4773	70.0862	1.07692
1	MIA PaCa2	D13_3	0.01	1_D13_3_86	G1	48	28	280	4.66667	78.5867	78.5867	69.4746	1.13116
1	MIA PaCa2	D13_3	0.01	1_D13_3_86	G1	49	29	290	4.83333	79.822	79.822	68.6304	1.16307
1	MIA PaCa2	D13_3	0.01	1_D13_3_86	G1	50	30	300	5	79.7906	79.7906	68.8548	1.15882
1	MIA PaCa2	D13_3	0.01	1_D13_3_86	G1	51	31	310	5.16667	77.4171	77.4171	68.1679	1.13568
1	MIA PaCa2	D13_3	0.01	1_D13_3_86	G1	52	32	320	5.33333	74.5878	74.5878	67.3507	1.10745
1	MIA PaCa2	D13_3	0.01	1_D13_3_86	G1	53	33	330	5.5	75.4759	75.4759	67.9219	1.11122
1	MIA PaCa2	D13_3	0.01	1_D13_3_86	G1	54	34	340	5.66667	71.5718	71.5718	68.0349	1.05199
1	MIA PaCa2	D13_3	0.01	1_D13_3_86	G1	55	35	350	5.83333	77.0597	77.0597	68.887	1.11864
1	MIA PaCa2	D13_3	0.01	1_D13_3_86	G1	56	36	360	6	78.9875	78.9875	68.1633	1.1588
1	MIA PaCa2	D13_3	0.01	1_D13_3_86	G1	57	37	370	6.16667	76.98	76.98	67.2471	1.14473
1	MIA PaCa2	D13_3	0.01	1_D13_3_86	G1	58	38	380	6.33333	77.861	77.861	67.1163	1.16009
1	MIA PaCa2	D13_3	0.01	1_D13_3_86	G1	59	39	390	6.5	75.6708	75.6708	66.9979	1.12945
1	MIA PaCa2	D13_3	0.01	1_D13_3_86	G1	60	40	400	6.66667	74.3333	74.3333	66.8466	1.112
1	MIA PaCa2	D13_3	0.01	1_D13_3_86	G1	61	41	410	6.83333	74.0026	74.0026	66.872	1.10663
1	MIA PaCa2	D13_3	0.01	1_D13_3_86	G1	62	42	420	7	73.8142	73.8142	67.4151	1.09492
1	MIA PaCa2	D13_3	0.01	1_D13_3_86	G1	63	43	430	7.16667	75.9898	75.9898	66.593	1.14111
1	MIA PaCa2	D13_3	0.01	1_D13_3_86	G1	64	44	440	7.33333	71.3953	71.3953	64.9413	1.09938
1	MIA PaCa2	D13_3	0.01	1_D13_3_86	G1	65	45	450	7.5	66.9316	66.9316	65.8821	1.01593
1	MIA PaCa2	D13_3	0.01	1_D13_3_86	G1	66	46	460	7.66667	68.0884	68.0884	65.7717	1.03522
1	MIA PaCa2	D13_3	0.01	1_D13_3_86	G1	67	47	470	7.83333	70.6683	70.6683	65.9693	1.07123
1	MIA PaCa2	D13_3	0.01	1_D13_3_86	G1	68	48	480	8	71.886	71.886	65.2461	1.10177
1	MIA PaCa2	D13_3	0.01	1_D13_3_86	G1	69	49	490	8.16667	71.088	71.088	64.9541	1.09443
1	MIA PaCa2	D13_3	0.01	1_D13_3_86	G1	70	50	500	8.33333	67.2657	67.2657	64.7238	1.03927
1	MIA PaCa2	D13_3	0.01	1_D13_3_86	G1	71	51	510	8.5	68.6753	68.6753	64.8745	1.05859
1	MIA PaCa2	D13_3	0.01	1_D13_3_86	G1	72	52	520	8.66667	65.8578	65.8578	65.0075	1.01308
1	MIA PaCa2	D13_3	0.01	1_D13_3_86	G1	73	53	530	8.83333	66.7891	66.7891	64.3036	1.03865
1	MIA PaCa2	D13_3	0.01	1_D13_3_86	G1	74	54	540	9	67.2183	67.2183	64.0165	1.05002
1	MIA PaCa2	D13_3	0.01	1_D13_3_86	G1	75	55	550	9.16667	70.0258	70.0258	64.712	1.08212
1	MIA PaCa2	D13_3	0.01	1_D13_3_86	G1	76	56	560	9.33333	68.8866	68.8866	64.0422	1.07564
1	MIA PaCa2	D13_3	0.01	1_D13_3_86	G1	77	57	570	9.5	70.5304	70.5304	63.8764	1.10417
1	MIA PaCa2	D13_3	0.01	1_D13_3_86	G1	78	58	580	9.66667	73.8858	73.8858	63.7423	1.15913
1	MIA PaCa2	D13_3	0.01	1_D13_3_86	G1	79	59	590	9.83333	72.7611	72.7611	63.4249	1.1472
1	MIA PaCa2	D13_3	0.01	1_D13_3_86	G1	80	60	600	10	73.8149	73.8149	63.1512	1.16886
1	MIA PaCa2	D13_3	0.01	1_D13_3_86	G1	81	61	610	10.1667	76.9446	76.9446	63.2666	1.2162
1	MIA PaCa2	D13_3	0.01	1_D13_3_86	G1	82	62	620	10.3333	77.1942	77.1942	62.8471	1.22829
1	MIA PaCa2	D13_3	0.01	1_D13_3_86	G1	83	63	630	10.5	72.6911	72.6911	62.9485	1.15477
1	MIA PaCa2	D13_3	0.01	1_D13_3_86	G1	84	64	640	10.6667	70.5558	70.5558	63.5908	1.10953
1	MIA PaCa2	D13_3	0.01	1_D13_3_86	G1	85	65	650	10.8333	70.3231	70.3231	63.0209	1.11587
1	MIA PaCa2	D13_3	0.01	1_D13_3_86	G1	86	66	660	11	74.5496	74.5496	63.2933	1.17784
1	MIA PaCa2	D13_3	0.01	1_D13_3_86	G1	87	67	670	11.1667	69.6166	69.6166	61.9681	1.12343
1	MIA PaCa2	D13_3	0.01	1_D13_3_86	G1	88	68	680	11.3333	71.2782	71.2782	61.0898	1.16678
1	MIA PaCa2	D13_3	0.01	1_D13_3_86	G1	89	69	690	11.5	71.2751	71.2751	61.5941	1.15717
1	MIA PaCa2	D13_3	0.01	1_D13_3_86	G1	90	70	700	11.6667	68.9284	68.9284	62.8735	1.0963
1	MIA PaCa2	D13_3	0.01	1_D13_3_86	G1	91	71	710	11.8333	66.093	66.093	61.5615	1.07361
1	MIA PaCa2	D13_3	0.01	1_D13_3_86	G1	92	72	720	12	67.5052	67.5052	60.7859	1.11054
1	MIA PaCa2	D13_3	0.01	1_D13_3_86	G1	93	73	730	12.1667	66.3979	66.3979	60.8609	1.09098
1	MIA PaCa2	D13_3	0.01	1_D13_3_86	G1	94	74	740	12.3333	69.6383	69.6383	60.9904	1.14179
1	MIA PaCa2	D13_3	0.01	1_D13_3_86	G1	95	75	750	12.5	70.6867	70.6867	61.556	1.14833
1	MIA PaCa2	D13_3	0.01	1_D13_3_86	G1	96	76	760	12.6667	72.1509	72.1509	61.3403	1.17624
1	MIA PaCa2	D13_3	0.01	1_D13_3_86	G1	97	77	770	12.8333	71.8598	71.8598	61.6391	1.16582
1	MIA PaCa2	D13_3	0.01	1_D13_3_86	G1	98	78	780	13	63.5119	63.5119	60.4758	1.0502
1	MIA PaCa2	D13_3	0.01	1_D13_3_86	G1	99	79	790	13.1667	65.1319	65.1319	60.3963	1.07841
1	MIA PaCa2	D13_3	0.01	1_D13_3_86	G1	100	80	800	13.3333	74.5465	74.5465	60.7884	1.22633
1	MIA PaCa2	D13_3	0.01	1_D13_3_86	G1	101	81	810	13.5	76.3324	76.3324	60.3059	1.26575
1	MIA PaCa2	D13_3	0.01	1_D13_3_86	G1	102	82	820	13.6667	68.7855	68.7855	60.7794	1.13172
1	MIA PaCa2	D13_3	0.01	1_D13_3_86	G1	103	83	830	13.8333	70.8444	70.8444	60.5056	1.17087
1	MIA PaCa2	D13_3	0.01	1_D13_3_86	G1	104	84	840	14	65.6868	65.6868	59.623	1.1017
1	MIA PaCa2	D13_3	0.01	1_D13_3_86	G1	105	85	850	14.1667	66.5149	66.5149	59.3892	1.11998
1	MIA PaCa2	D13_3	0.01	1_D13_3_86	G1	106	86	860	14.3333	70.3219	70.3219	59.9458	1.17309
1	MIA PaCa2	D13_3	0.01	1_D13_3_86	G1	107	87	870	14.5	70.4886	70.4886	59.293	1.18882
1	MIA PaCa2	D13_3	0.01	1_D13_3_86	G1	108	88	880	14.6667	66.6743	66.6743	59.7326	1.11621
1	MIA PaCa2	D13_3	0.01	1_D13_3_86	G1	109	89	890	14.8333	68.2943	68.2943	59.2145	1.15334
1	MIA PaCa2	D13_3	0.01	1_D13_3_86	G1	110	90	900	15	65.8683	65.8683	59.5265	1.10654
1	MIA PaCa2	D13_3	0.01	1_D13_3_86	G1	111	91	910	15.1667	69.5894	69.5894	22.61	3.07781
1	MIA PaCa2	D13_3	0.01	1_D13_3_86	G1	112	92	920	15.3333	26.2919	26.2919	22.6798	1.15927
1	MIA PaCa2	D13_3	0.01	1_D13_3_86	G1	113	93	930	15.5	26.2549	26.2549	22.7253	1.15532
1	MIA PaCa2	D13_3	0.01	1_D13_3_86	G1	114	94	940	15.6667	23.9295	23.9295	22.5639	1.06052
1	MIA PaCa2	D13_3	0.01	1_D13_3_86	G1	115	95	950	15.8333	23.072	23.072	22.4399	1.02817
1	MIA PaCa2	D13_3	0.01	1_D13_3_86	G1	116	96	960	16	21.0841	21.0841	22.771	0.925918
1	MIA PaCa2	D13_3	0.01	1_D13_3_86	G1	118	98	980	16.3333	23.3061	23.3061	23.0617	1.0106
1	MIA PaCa2	D13_3	0.01	1_D13_3_87	G1	16	-4	-40	-0.666667	91.0296	91.0296	82.5286	1.10301
1	MIA PaCa2	D13_3	0.01	1_D13_3_87	G1	17	-3	-30	-0.5	96.3113	96.3113	83.098	1.15901
1	MIA PaCa2	D13_3	0.01	1_D13_3_87	G1	18	-2	-20	-0.333333	85.6564	85.6564	82.7797	1.03475
1	MIA PaCa2	D13_3	0.01	1_D13_3_87	G1	19	-1	-10	-0.166667	91.7947	91.7947	82.0129	1.11927
1	MIA PaCa2	D13_3	0.01	1_D13_3_87	G1	20	0	0	0	86.2878	86.2878	81.1847	1.06286
1	MIA PaCa2	D13_3	0.01	1_D13_3_87	G1	21	1	10	0.166667	92.3311	92.3311	84.5183	1.09244
1	MIA PaCa2	D13_3	0.01	1_D13_3_87	G1	22	2	20	0.333333	88.9326	88.9326	82.9015	1.07275
1	MIA PaCa2	D13_3	0.01	1_D13_3_87	G1	23	3	30	0.5	93.6724	93.6724	82.0655	1.14143
1	MIA PaCa2	D13_3	0.01	1_D13_3_87	G1	24	4	40	0.666667	96.1349	96.1349	80.9707	1.18728
1	MIA PaCa2	D13_3	0.01	1_D13_3_87	G1	25	5	50	0.833333	95.9539	95.9539	80.691	1.18915
1	MIA PaCa2	D13_3	0.01	1_D13_3_87	G1	26	6	60	1	96.1507	96.1507	79.6097	1.20778
1	MIA PaCa2	D13_3	0.01	1_D13_3_87	G1	27	7	70	1.16667	93.2	93.2	79.1117	1.17808
1	MIA PaCa2	D13_3	0.01	1_D13_3_87	G1	28	8	80	1.33333	93.5809	93.5809	78.0016	1.19973
1	MIA PaCa2	D13_3	0.01	1_D13_3_87	G1	29	9	90	1.5	91.1718	91.1718	77.8528	1.17108
1	MIA PaCa2	D13_3	0.01	1_D13_3_87	G1	30	10	100	1.66667	94.9596	94.9596	77.6698	1.22261
1	MIA PaCa2	D13_3	0.01	1_D13_3_87	G1	31	11	110	1.83333	91.9383	91.9383	77.1169	1.19219
1	MIA PaCa2	D13_3	0.01	1_D13_3_87	G1	32	12	120	2	92.25	92.25	76.7701	1.20164
1	MIA PaCa2	D13_3	0.01	1_D13_3_87	G1	33	13	130	2.16667	90.7666	90.7666	75.9843	1.19454
1	MIA PaCa2	D13_3	0.01	1_D13_3_87	G1	34	14	140	2.33333	89.3365	89.3365	75.0842	1.18982
1	MIA PaCa2	D13_3	0.01	1_D13_3_87	G1	35	15	150	2.5	87.5047	87.5047	75.707	1.15583
1	MIA PaCa2	D13_3	0.01	1_D13_3_87	G1	36	16	160	2.66667	80.853	80.853	74.2775	1.08853
1	MIA PaCa2	D13_3	0.01	1_D13_3_87	G1	37	17	170	2.83333	81.19	81.19	73.2738	1.10804
1	MIA PaCa2	D13_3	0.01	1_D13_3_87	G1	38	18	180	3	85.509	85.509	73.1743	1.16857
1	MIA PaCa2	D13_3	0.01	1_D13_3_87	G1	39	19	190	3.16667	81.1358	81.1358	72.5019	1.11908
1	MIA PaCa2	D13_3	0.01	1_D13_3_87	G1	40	20	200	3.33333	80.457	80.457	71.7669	1.12109
1	MIA PaCa2	D13_3	0.01	1_D13_3_87	G1	41	21	210	3.5	80.6918	80.6918	72.0161	1.12047
1	MIA PaCa2	D13_3	0.01	1_D13_3_87	G1	42	22	220	3.66667	81.145	81.145	71.8185	1.12986
1	MIA PaCa2	D13_3	0.01	1_D13_3_87	G1	43	23	230	3.83333	79.3428	79.3428	71.1314	1.11544
1	MIA PaCa2	D13_3	0.01	1_D13_3_87	G1	44	24	240	4	80.5612	80.5612	70.5922	1.14122
1	MIA PaCa2	D13_3	0.01	1_D13_3_87	G1	45	25	250	4.16667	80.5527	80.5527	70.3088	1.1457
1	MIA PaCa2	D13_3	0.01	1_D13_3_87	G1	46	26	260	4.33333	79.5595	79.5595	70.5953	1.12698
1	MIA PaCa2	D13_3	0.01	1_D13_3_87	G1	47	27	270	4.5	76.6508	76.6508	70.0862	1.09367
1	MIA PaCa2	D13_3	0.01	1_D13_3_87	G1	48	28	280	4.66667	76.9118	76.9118	69.4746	1.10705
1	MIA PaCa2	D13_3	0.01	1_D13_3_87	G1	49	29	290	4.83333	76.1511	76.1511	68.6304	1.10958
1	MIA PaCa2	D13_3	0.01	1_D13_3_87	G1	50	30	300	5	77.995	77.995	68.8548	1.13275
1	MIA PaCa2	D13_3	0.01	1_D13_3_87	G1	51	31	310	5.16667	79.35	79.35	68.1679	1.16404
1	MIA PaCa2	D13_3	0.01	1_D13_3_87	G1	52	32	320	5.33333	77.7181	77.7181	67.3507	1.15393
1	MIA PaCa2	D13_3	0.01	1_D13_3_87	G1	53	33	330	5.5	79.1941	79.1941	67.9219	1.16596
1	MIA PaCa2	D13_3	0.01	1_D13_3_87	G1	54	34	340	5.66667	78.9248	78.9248	68.0349	1.16006
1	MIA PaCa2	D13_3	0.01	1_D13_3_87	G1	55	35	350	5.83333	81.409	81.409	68.887	1.18178
1	MIA PaCa2	D13_3	0.01	1_D13_3_87	G1	56	36	360	6	78.7444	78.7444	68.1633	1.15523
1	MIA PaCa2	D13_3	0.01	1_D13_3_87	G1	57	37	370	6.16667	76.25	76.25	67.2471	1.13388
1	MIA PaCa2	D13_3	0.01	1_D13_3_87	G1	58	38	380	6.33333	75.7155	75.7155	67.1163	1.12812
1	MIA PaCa2	D13_3	0.01	1_D13_3_87	G1	59	39	390	6.5	75.2213	75.2213	66.9979	1.12274
1	MIA PaCa2	D13_3	0.01	1_D13_3_87	G1	60	40	400	6.66667	74.842	74.842	66.8466	1.11961
1	MIA PaCa2	D13_3	0.01	1_D13_3_87	G1	61	41	410	6.83333	77.0426	77.0426	66.872	1.15209
1	MIA PaCa2	D13_3	0.01	1_D13_3_87	G1	62	42	420	7	76.414	76.414	67.4151	1.13349
1	MIA PaCa2	D13_3	0.01	1_D13_3_87	G1	63	43	430	7.16667	77.9592	77.9592	66.593	1.17068
1	MIA PaCa2	D13_3	0.01	1_D13_3_87	G1	64	44	440	7.33333	73.5196	73.5196	64.9413	1.13209
1	MIA PaCa2	D13_3	0.01	1_D13_3_87	G1	65	45	450	7.5	73.9396	73.9396	65.8821	1.1223
1	MIA PaCa2	D13_3	0.01	1_D13_3_87	G1	66	46	460	7.66667	72.1214	72.1214	65.7717	1.09654
1	MIA PaCa2	D13_3	0.01	1_D13_3_87	G1	67	47	470	7.83333	68.0364	68.0364	65.9693	1.03133
1	MIA PaCa2	D13_3	0.01	1_D13_3_87	G1	68	48	480	8	69.4929	69.4929	65.2461	1.06509
1	MIA PaCa2	D13_3	0.01	1_D13_3_87	G1	69	49	490	8.16667	71	71	64.9541	1.09308
1	MIA PaCa2	D13_3	0.01	1_D13_3_87	G1	70	50	500	8.33333	72.2143	72.2143	64.7238	1.11573
1	MIA PaCa2	D13_3	0.01	1_D13_3_87	G1	71	51	510	8.5	70.79	70.79	64.8745	1.09118
1	MIA PaCa2	D13_3	0.01	1_D13_3_87	G1	72	52	520	8.66667	71.1717	71.1717	65.0075	1.09482
1	MIA PaCa2	D13_3	0.01	1_D13_3_87	G1	73	53	530	8.83333	68.4668	68.4668	64.3036	1.06474
1	MIA PaCa2	D13_3	0.01	1_D13_3_87	G1	74	54	540	9	71.8087	71.8087	64.0165	1.12172
1	MIA PaCa2	D13_3	0.01	1_D13_3_87	G1	75	55	550	9.16667	70.1688	70.1688	64.712	1.08432
1	MIA PaCa2	D13_3	0.01	1_D13_3_87	G1	76	56	560	9.33333	68.8987	68.8987	64.0422	1.07583
1	MIA PaCa2	D13_3	0.01	1_D13_3_87	G1	77	57	570	9.5	71.8995	71.8995	63.8764	1.1256
1	MIA PaCa2	D13_3	0.01	1_D13_3_87	G1	78	58	580	9.66667	73.4253	73.4253	63.7423	1.15191
1	MIA PaCa2	D13_3	0.01	1_D13_3_87	G1	79	59	590	9.83333	73.5937	73.5937	63.4249	1.16033
1	MIA PaCa2	D13_3	0.01	1_D13_3_87	G1	80	60	600	10	74.1611	74.1611	63.1512	1.17434
1	MIA PaCa2	D13_3	0.01	1_D13_3_87	G1	81	61	610	10.1667	73.5867	73.5867	63.2666	1.16312
1	MIA PaCa2	D13_3	0.01	1_D13_3_87	G1	82	62	620	10.3333	70.6061	70.6061	62.8471	1.12346
1	MIA PaCa2	D13_3	0.01	1_D13_3_87	G1	83	63	630	10.5	73.3422	73.3422	62.9485	1.16511
1	MIA PaCa2	D13_3	0.01	1_D13_3_87	G1	84	64	640	10.6667	71.0605	71.0605	63.5908	1.11747
1	MIA PaCa2	D13_3	0.01	1_D13_3_87	G1	85	65	650	10.8333	67.3351	67.3351	63.0209	1.06846
1	MIA PaCa2	D13_3	0.01	1_D13_3_87	G1	86	66	660	11	71.3517	71.3517	63.2933	1.12732
1	MIA PaCa2	D13_3	0.01	1_D13_3_87	G1	87	67	670	11.1667	65.1283	65.1283	61.9681	1.051
1	MIA PaCa2	D13_3	0.01	1_D13_3_87	G1	88	68	680	11.3333	69.8469	69.8469	61.0898	1.14335
1	MIA PaCa2	D13_3	0.01	1_D13_3_87	G1	89	69	690	11.5	67.836	67.836	61.5941	1.10134
1	MIA PaCa2	D13_3	0.01	1_D13_3_87	G1	90	70	700	11.6667	69.0284	69.0284	62.8735	1.09789
1	MIA PaCa2	D13_3	0.01	1_D13_3_87	G1	91	71	710	11.8333	63.7388	63.7388	61.5615	1.03537
1	MIA PaCa2	D13_3	0.01	1_D13_3_87	G1	92	72	720	12	64.2283	64.2283	60.7859	1.05663
1	MIA PaCa2	D13_3	0.01	1_D13_3_87	G1	93	73	730	12.1667	63.4402	63.4402	60.8609	1.04238
1	MIA PaCa2	D13_3	0.01	1_D13_3_87	G1	94	74	740	12.3333	67.3948	67.3948	60.9904	1.10501
1	MIA PaCa2	D13_3	0.01	1_D13_3_87	G1	95	75	750	12.5	67.2031	67.2031	61.556	1.09174
1	MIA PaCa2	D13_3	0.01	1_D13_3_87	G1	96	76	760	12.6667	66.8652	66.8652	61.3403	1.09007
1	MIA PaCa2	D13_3	0.01	1_D13_3_87	G1	97	77	770	12.8333	64.2447	64.2447	61.6391	1.04227
1	MIA PaCa2	D13_3	0.01	1_D13_3_87	G1	98	78	780	13	63.9258	63.9258	60.4758	1.05705
1	MIA PaCa2	D13_3	0.01	1_D13_3_87	G1	99	79	790	13.1667	64.2244	64.2244	60.3963	1.06338
1	MIA PaCa2	D13_3	0.01	1_D13_3_87	G1	100	80	800	13.3333	63.9805	63.9805	60.7884	1.05251
1	MIA PaCa2	D13_3	0.01	1_D13_3_87	G1	101	81	810	13.5	62.6423	62.6423	60.3059	1.03874
1	MIA PaCa2	D13_3	0.01	1_D13_3_87	G1	102	82	820	13.6667	70.6064	70.6064	60.7794	1.16168
1	MIA PaCa2	D13_3	0.01	1_D13_3_87	G1	103	83	830	13.8333	70.9602	70.9602	60.5056	1.17279
1	MIA PaCa2	D13_3	0.01	1_D13_3_87	G1	104	84	840	14	70.5582	70.5582	59.623	1.18341
1	MIA PaCa2	D13_3	0.01	1_D13_3_87	G1	105	85	850	14.1667	70.0412	70.0412	59.3892	1.17936
1	MIA PaCa2	D13_3	0.01	1_D13_3_87	G1	106	86	860	14.3333	72.5666	72.5666	59.9458	1.21054
1	MIA PaCa2	D13_3	0.01	1_D13_3_87	G1	107	87	870	14.5	69.0259	69.0259	59.293	1.16415
1	MIA PaCa2	D13_3	0.01	1_D13_3_87	G1	108	88	880	14.6667	71.565	71.565	59.7326	1.19809
1	MIA PaCa2	D13_3	0.01	1_D13_3_87	G1	109	89	890	14.8333	74.5528	74.5528	59.2145	1.25903
1	MIA PaCa2	D13_3	0.01	1_D13_3_87	G1	110	90	900	15	72.2363	72.2363	59.5265	1.21351
1	MIA PaCa2	D13_3	0.01	1_D13_3_87	G1	111	91	910	15.1667	68.7021	68.7021	22.61	3.03857
1	MIA PaCa2	D13_3	0.01	1_D13_3_87	G1	112	92	920	15.3333	26.0476	26.0476	22.6798	1.14849
1	MIA PaCa2	D13_3	0.01	1_D13_3_87	G1	113	93	930	15.5	24.7836	24.7836	22.7253	1.09058
1	MIA PaCa2	D13_3	0.01	1_D13_3_87	G1	114	94	940	15.6667	24.5576	24.5576	22.5639	1.08836
1	MIA PaCa2	D13_3	0.01	1_D13_3_87	G1	115	95	950	15.8333	25.3181	25.3181	22.4399	1.12826
1	MIA PaCa2	D13_3	0.01	1_D13_3_87	G1	116	96	960	16	26.9819	26.9819	22.771	1.18492
1	MIA PaCa2	D13_3	0.01	1_D13_3_87	G1	117	97	970	16.1667	25.8491	25.8491	22.6665	1.14041
1	MIA PaCa2	D13_3	0.01	1_D13_3_87	G1	118	98	980	16.3333	26.229	26.229	23.0617	1.13734
1	MIA PaCa2	D13_3	0.01	1_D13_3_87	G1	119	99	990	16.5	25.482	25.482	22.7043	1.12234
1	MIA PaCa2	D13_3	0.01	1_D13_3_87	G1	120	100	1000	16.6667	25.7089	25.7089	22.9546	1.11999
1	MIA PaCa2	D13_4	0.01	1_D13_4_5	G2	1	-19	-190	-3.16667	116.53	116.53	98.9025	1.17823
1	MIA PaCa2	D13_4	0.01	1_D13_4_5	G2	2	-18	-180	-3	120.623	120.623	98.287	1.22726
1	MIA PaCa2	D13_4	0.01	1_D13_4_5	G2	3	-17	-170	-2.83333	112.075	112.075	95.5639	1.17277
1	MIA PaCa2	D13_4	0.01	1_D13_4_5	G2	4	-16	-160	-2.66667	111.185	111.185	94.8279	1.17249
1	MIA PaCa2	D13_4	0.01	1_D13_4_5	G2	5	-15	-150	-2.5	108.781	108.781	93.7282	1.1606
1	MIA PaCa2	D13_4	0.01	1_D13_4_5	G2	6	-14	-140	-2.33333	110.156	110.156	91.2043	1.20779
1	MIA PaCa2	D13_4	0.01	1_D13_4_5	G2	7	-13	-130	-2.16667	105.691	105.691	91.0398	1.16094
1	MIA PaCa2	D13_4	0.01	1_D13_4_5	G2	8	-12	-120	-2	103.736	103.736	89.9628	1.1531
1	MIA PaCa2	D13_4	0.01	1_D13_4_5	G2	9	-11	-110	-1.83333	99.5061	99.5061	88.8498	1.11994
1	MIA PaCa2	D13_4	0.01	1_D13_4_5	G2	10	-10	-100	-1.66667	98.6831	98.6831	88.0257	1.12107
1	MIA PaCa2	D13_4	0.01	1_D13_4_5	G2	11	-9	-90	-1.5	96.8315	96.8315	87.39	1.10804
1	MIA PaCa2	D13_4	0.01	1_D13_4_5	G2	12	-8	-80	-1.33333	95.8202	95.8202	86.2825	1.11054
1	MIA PaCa2	D13_4	0.01	1_D13_4_5	G2	13	-7	-70	-1.16667	93.8733	93.8733	84.872	1.10606
1	MIA PaCa2	D13_4	0.01	1_D13_4_5	G2	14	-6	-60	-1	95.3952	95.3952	85.6506	1.11377
1	MIA PaCa2	D13_4	0.01	1_D13_4_5	G2	15	-5	-50	-0.833333	92.3994	92.3994	84.1405	1.09816
1	MIA PaCa2	D13_4	0.01	1_D13_4_5	G2	16	-4	-40	-0.666667	91.9971	91.9971	82.5286	1.11473
1	MIA PaCa2	D13_4	0.01	1_D13_4_5	G2	17	-3	-30	-0.5	92.3953	92.3953	83.098	1.11188
1	MIA PaCa2	D13_4	0.01	1_D13_4_5	G2	18	-2	-20	-0.333333	91.2072	91.2072	82.7797	1.10181
1	MIA PaCa2	D13_4	0.01	1_D13_4_5	G2	19	-1	-10	-0.166667	90.9256	90.9256	82.0129	1.10867
1	MIA PaCa2	D13_4	0.01	1_D13_4_5	G2	20	0	0	0	89.8	89.8	81.1847	1.10612
1	MIA PaCa2	D13_4	0.01	1_D13_4_5	G2	21	1	10	0.166667	93.2316	93.2316	84.5183	1.10309
1	MIA PaCa2	D13_4	0.01	1_D13_4_5	G2	22	2	20	0.333333	92.2733	92.2733	82.9015	1.11305
1	MIA PaCa2	D13_4	0.01	1_D13_4_5	G2	23	3	30	0.5	92.9075	92.9075	82.0655	1.13211
1	MIA PaCa2	D13_4	0.01	1_D13_4_5	G2	24	4	40	0.666667	91.8142	91.8142	80.9707	1.13392
1	MIA PaCa2	D13_4	0.01	1_D13_4_5	G2	25	5	50	0.833333	93.0295	93.0295	80.691	1.15291
1	MIA PaCa2	D13_4	0.01	1_D13_4_5	G2	26	6	60	1	92.6737	92.6737	79.6097	1.1641
1	MIA PaCa2	D13_4	0.01	1_D13_4_5	G2	27	7	70	1.16667	92.1047	92.1047	79.1117	1.16424
1	MIA PaCa2	D13_4	0.01	1_D13_4_5	G2	28	8	80	1.33333	92.3693	92.3693	78.0016	1.1842
1	MIA PaCa2	D13_4	0.01	1_D13_4_5	G2	29	9	90	1.5	96.5237	96.5237	77.8528	1.23982
1	MIA PaCa2	D13_4	0.01	1_D13_4_5	G2	30	10	100	1.66667	95.6962	95.6962	77.6698	1.23209
1	MIA PaCa2	D13_4	0.01	1_D13_4_5	G2	31	11	110	1.83333	102.374	102.374	77.1169	1.32752
1	MIA PaCa2	D13_4	0.01	1_D13_4_5	G2	32	12	120	2	106.953	106.953	76.7701	1.39316
1	MIA PaCa2	D13_4	0.01	1_D13_4_5	G2	33	13	130	2.16667	107.498	107.498	75.9843	1.41474
1	MIA PaCa2	D13_4	0.01	1_D13_4_5	G2	34	14	140	2.33333	109.253	109.253	75.0842	1.45508
1	MIA PaCa2	D13_4	0.01	1_D13_4_5	G2	35	15	150	2.5	111.094	111.094	75.707	1.46742
1	MIA PaCa2	D13_4	0.01	1_D13_4_5	G2	36	16	160	2.66667	109.734	109.734	74.2775	1.47735
1	MIA PaCa2	D13_4	0.01	1_D13_4_5	G2	37	17	170	2.83333	107.064	107.064	73.2738	1.46115
1	MIA PaCa2	D13_4	0.01	1_D13_4_5	G2	38	18	180	3	110.452	110.452	73.1743	1.50943
1	MIA PaCa2	D13_4	0.01	1_D13_4_5	G2	39	19	190	3.16667	106.923	106.923	72.5019	1.47476
1	MIA PaCa2	D13_4	0.01	1_D13_4_5	G2	40	20	200	3.33333	105.853	105.853	71.7669	1.47495
1	MIA PaCa2	D13_4	0.01	1_D13_4_5	G2	41	21	210	3.5	107.899	107.899	72.0161	1.49826
1	MIA PaCa2	D13_4	0.01	1_D13_4_62	G2	2	-18	-180	-3	132.051	132.051	98.287	1.34352
1	MIA PaCa2	D13_4	0.01	1_D13_4_62	G2	3	-17	-170	-2.83333	122.207	122.207	95.5639	1.2788
1	MIA PaCa2	D13_4	0.01	1_D13_4_62	G2	4	-16	-160	-2.66667	128.732	128.732	94.8279	1.35754
1	MIA PaCa2	D13_4	0.01	1_D13_4_62	G2	5	-15	-150	-2.5	116.918	116.918	93.7282	1.24742
1	MIA PaCa2	D13_4	0.01	1_D13_4_62	G2	6	-14	-140	-2.33333	110.791	110.791	91.2043	1.21475
1	MIA PaCa2	D13_4	0.01	1_D13_4_62	G2	7	-13	-130	-2.16667	109.395	109.395	91.0398	1.20162
1	MIA PaCa2	D13_4	0.01	1_D13_4_62	G2	8	-12	-120	-2	111.005	111.005	89.9628	1.2339
1	MIA PaCa2	D13_4	0.01	1_D13_4_62	G2	9	-11	-110	-1.83333	105.519	105.519	88.8498	1.18762
1	MIA PaCa2	D13_4	0.01	1_D13_4_62	G2	10	-10	-100	-1.66667	107.939	107.939	88.0257	1.22623
1	MIA PaCa2	D13_4	0.01	1_D13_4_62	G2	11	-9	-90	-1.5	118.192	118.192	87.39	1.35246
1	MIA PaCa2	D13_4	0.01	1_D13_4_62	G2	12	-8	-80	-1.33333	111.754	111.754	86.2825	1.29522
1	MIA PaCa2	D13_4	0.01	1_D13_4_62	G2	13	-7	-70	-1.16667	111.641	111.641	84.872	1.31541
1	MIA PaCa2	D13_4	0.01	1_D13_4_62	G2	14	-6	-60	-1	117.683	117.683	85.6506	1.37398
1	MIA PaCa2	D13_4	0.01	1_D13_4_62	G2	15	-5	-50	-0.833333	114	114	84.1405	1.35488
1	MIA PaCa2	D13_4	0.01	1_D13_4_62	G2	16	-4	-40	-0.666667	111.192	111.192	82.5286	1.34732
1	MIA PaCa2	D13_4	0.01	1_D13_4_62	G2	17	-3	-30	-0.5	104.566	104.566	83.098	1.25834
1	MIA PaCa2	D13_4	0.01	1_D13_4_62	G2	18	-2	-20	-0.333333	110.629	110.629	82.7797	1.33642
1	MIA PaCa2	D13_4	0.01	1_D13_4_62	G2	19	-1	-10	-0.166667	106.069	106.069	82.0129	1.29332
1	MIA PaCa2	D13_4	0.01	1_D13_4_62	G2	20	0	0	0	99.6211	99.6211	81.1847	1.22709
1	MIA PaCa2	D13_4	0.01	1_D13_4_62	G2	21	1	10	0.166667	112.326	112.326	84.5183	1.32901
1	MIA PaCa2	D13_4	0.01	1_D13_4_62	G2	22	2	20	0.333333	110.721	110.721	82.9015	1.33557
1	MIA PaCa2	D13_4	0.01	1_D13_4_62	G2	23	3	30	0.5	110.177	110.177	82.0655	1.34255
1	MIA PaCa2	D13_4	0.01	1_D13_4_62	G2	24	4	40	0.666667	104.797	104.797	80.9707	1.29426
1	MIA PaCa2	D13_4	0.01	1_D13_4_62	G2	25	5	50	0.833333	111.294	111.294	80.691	1.37927
1	MIA PaCa2	D13_4	0.01	1_D13_4_62	G2	26	6	60	1	105.305	105.305	79.6097	1.32276
1	MIA PaCa2	D13_4	0.01	1_D13_4_62	G2	27	7	70	1.16667	113.281	113.281	79.1117	1.43191
1	MIA PaCa2	D13_4	0.01	1_D13_4_62	G2	28	8	80	1.33333	110.603	110.603	78.0016	1.41796
1	MIA PaCa2	D13_4	0.01	1_D13_4_62	G2	29	9	90	1.5	114.276	114.276	77.8528	1.46785
1	MIA PaCa2	D13_4	0.01	1_D13_4_62	G2	30	10	100	1.66667	111.071	111.071	77.6698	1.43004
1	MIA PaCa2	D13_4	0.01	1_D13_4_62	G2	31	11	110	1.83333	116.311	116.311	77.1169	1.50824
1	MIA PaCa2	D13_4	0.01	1_D13_4_62	G2	32	12	120	2	107.495	107.495	76.7701	1.40022
1	MIA PaCa2	D13_4	0.01	1_D13_4_7	G2	0	-20	-200	-3.33333	119.808	119.808	102.696	1.16663
1	MIA PaCa2	D13_4	0.01	1_D13_4_7	G2	1	-19	-190	-3.16667	115.731	115.731	98.9025	1.17015
1	MIA PaCa2	D13_4	0.01	1_D13_4_7	G2	2	-18	-180	-3	111.385	111.385	98.287	1.13327
1	MIA PaCa2	D13_4	0.01	1_D13_4_7	G2	3	-17	-170	-2.83333	107.242	107.242	95.5639	1.1222
1	MIA PaCa2	D13_4	0.01	1_D13_4_7	G2	4	-16	-160	-2.66667	105.597	105.597	94.8279	1.11356
1	MIA PaCa2	D13_4	0.01	1_D13_4_7	G2	5	-15	-150	-2.5	110.145	110.145	93.7282	1.17516
1	MIA PaCa2	D13_4	0.01	1_D13_4_7	G2	6	-14	-140	-2.33333	109.292	109.292	91.2043	1.19832
1	MIA PaCa2	D13_4	0.01	1_D13_4_7	G2	7	-13	-130	-2.16667	107.499	107.499	91.0398	1.18079
1	MIA PaCa2	D13_4	0.01	1_D13_4_7	G2	8	-12	-120	-2	108.334	108.334	89.9628	1.20421
1	MIA PaCa2	D13_4	0.01	1_D13_4_7	G2	9	-11	-110	-1.83333	102.088	102.088	88.8498	1.149
1	MIA PaCa2	D13_4	0.01	1_D13_4_7	G2	10	-10	-100	-1.66667	101.152	101.152	88.0257	1.14912
1	MIA PaCa2	D13_4	0.01	1_D13_4_7	G2	11	-9	-90	-1.5	98.78	98.78	87.39	1.13033
1	MIA PaCa2	D13_4	0.01	1_D13_4_7	G2	12	-8	-80	-1.33333	96.9382	96.9382	86.2825	1.1235
1	MIA PaCa2	D13_4	0.01	1_D13_4_7	G2	13	-7	-70	-1.16667	94.6756	94.6756	84.872	1.11551
1	MIA PaCa2	D13_4	0.01	1_D13_4_7	G2	14	-6	-60	-1	95.1258	95.1258	85.6506	1.11063
1	MIA PaCa2	D13_4	0.01	1_D13_4_7	G2	15	-5	-50	-0.833333	92.2972	92.2972	84.1405	1.09694
1	MIA PaCa2	D13_4	0.01	1_D13_4_7	G2	16	-4	-40	-0.666667	94.8435	94.8435	82.5286	1.14922
1	MIA PaCa2	D13_4	0.01	1_D13_4_7	G2	17	-3	-30	-0.5	92.2515	92.2515	83.098	1.11015
1	MIA PaCa2	D13_4	0.01	1_D13_4_7	G2	18	-2	-20	-0.333333	92.6231	92.6231	82.7797	1.11891
1	MIA PaCa2	D13_4	0.01	1_D13_4_7	G2	19	-1	-10	-0.166667	93.3218	93.3218	82.0129	1.13789
1	MIA PaCa2	D13_4	0.01	1_D13_4_7	G2	20	0	0	0	94.4833	94.4833	81.1847	1.16381
1	MIA PaCa2	D13_4	0.01	1_D13_4_7	G2	21	1	10	0.166667	99.8714	99.8714	84.5183	1.18165
1	MIA PaCa2	D13_4	0.01	1_D13_4_7	G2	22	2	20	0.333333	98.1345	98.1345	82.9015	1.18375
1	MIA PaCa2	D13_4	0.01	1_D13_4_7	G2	23	3	30	0.5	95.25	95.25	82.0655	1.16066
1	MIA PaCa2	D13_4	0.01	1_D13_4_7	G2	24	4	40	0.666667	91.5726	91.5726	80.9707	1.13093
1	MIA PaCa2	D13_4	0.01	1_D13_4_7	G2	25	5	50	0.833333	95.3212	95.3212	80.691	1.18131
1	MIA PaCa2	D13_4	0.01	1_D13_4_7	G2	26	6	60	1	100.892	100.892	79.6097	1.26733
1	MIA PaCa2	D13_4	0.01	1_D13_4_7	G2	27	7	70	1.16667	97.8673	97.8673	79.1117	1.23708
1	MIA PaCa2	D13_4	0.01	1_D13_4_7	G2	28	8	80	1.33333	92.5016	92.5016	78.0016	1.18589
1	MIA PaCa2	D13_4	0.01	1_D13_4_7	G2	29	9	90	1.5	97.7575	97.7575	77.8528	1.25567
1	MIA PaCa2	D13_4	0.01	1_D13_4_7	G2	30	10	100	1.66667	97.6805	97.6805	77.6698	1.25764
1	MIA PaCa2	D13_4	0.01	1_D13_4_7	G2	31	11	110	1.83333	92.6237	92.6237	77.1169	1.20108
1	MIA PaCa2	D13_4	0.01	1_D13_4_7	G2	32	12	120	2	99.969	99.969	76.7701	1.30219
1	MIA PaCa2	D13_4	0.01	1_D13_4_7	G2	33	13	130	2.16667	101.492	101.492	75.9843	1.3357
1	MIA PaCa2	D13_4	0.01	1_D13_4_7	G2	34	14	140	2.33333	94.2847	94.2847	75.0842	1.25572
1	MIA PaCa2	D13_4	0.01	1_D13_4_7	G2	35	15	150	2.5	97.1532	97.1532	75.707	1.28328
1	MIA PaCa2	D13_4	0.01	1_D13_4_7	G2	36	16	160	2.66667	98.1145	98.1145	74.2775	1.32092
1	MIA PaCa2	D13_4	0.01	1_D13_4_7	G2	37	17	170	2.83333	109.44	109.44	73.2738	1.49357
1	MIA PaCa2	D13_4	0.01	1_D13_4_7	G2	38	18	180	3	107.657	107.657	73.1743	1.47125
1	MIA PaCa2	D13_4	0.01	1_D13_4_7	G2	39	19	190	3.16667	103.135	103.135	72.5019	1.42251
1	MIA PaCa2	D13_4	0.01	1_D13_4_7	G2	40	20	200	3.33333	110.108	110.108	71.7669	1.53424
1	MIA PaCa2	D13_4	0.01	1_D13_4_7	G2	41	21	210	3.5	102.925	102.925	72.0161	1.4292
1	MIA PaCa2	D13_4	0.01	1_D13_4_7	G2	42	22	220	3.66667	98.529	98.529	71.8185	1.37192
1	MIA PaCa2	D13_4	0.01	1_D13_4_7	G2	43	23	230	3.83333	89.7449	89.7449	71.1314	1.26168
1	MIA PaCa2	D13_4	0.01	1_D13_4_7	G2	44	24	240	4	100.357	100.357	70.5922	1.42164
1	MIA PaCa2	D14_1	0.01	1_D14_1_16	S	0	-20	-200	-3.33333	93.9766	93.9766	102.696	0.915095
1	MIA PaCa2	D14_1	0.01	1_D14_1_16	S	1	-19	-190	-3.16667	91.9184	91.9184	98.9025	0.929384
1	MIA PaCa2	D14_1	0.01	1_D14_1_16	S	2	-18	-180	-3	90.8951	90.8951	98.287	0.924792
1	MIA PaCa2	D14_1	0.01	1_D14_1_16	S	3	-17	-170	-2.83333	87.3608	87.3608	95.5639	0.914161
1	MIA PaCa2	D14_1	0.01	1_D14_1_16	S	4	-16	-160	-2.66667	88.237	88.237	94.8279	0.930496
1	MIA PaCa2	D14_1	0.01	1_D14_1_16	S	5	-15	-150	-2.5	87.4919	87.4919	93.7282	0.933464
1	MIA PaCa2	D14_1	0.01	1_D14_1_16	S	6	-14	-140	-2.33333	84.5619	84.5619	91.2043	0.92717
1	MIA PaCa2	D14_1	0.01	1_D14_1_16	S	7	-13	-130	-2.16667	83.2263	83.2263	91.0398	0.914175
1	MIA PaCa2	D14_1	0.01	1_D14_1_16	S	8	-12	-120	-2	82.8459	82.8459	89.9628	0.920891
1	MIA PaCa2	D14_1	0.01	1_D14_1_16	S	9	-11	-110	-1.83333	82.2945	82.2945	88.8498	0.926221
1	MIA PaCa2	D14_1	0.01	1_D14_1_16	S	10	-10	-100	-1.66667	81.9752	81.9752	88.0257	0.931264
1	MIA PaCa2	D14_1	0.01	1_D14_1_16	S	11	-9	-90	-1.5	78.6063	78.6063	87.39	0.899488
1	MIA PaCa2	D14_1	0.01	1_D14_1_16	S	12	-8	-80	-1.33333	76.877	76.877	86.2825	0.890991
1	MIA PaCa2	D14_1	0.01	1_D14_1_16	S	13	-7	-70	-1.16667	74.1858	74.1858	84.872	0.87409
1	MIA PaCa2	D14_1	0.01	1_D14_1_16	S	14	-6	-60	-1	76.0603	76.0603	85.6506	0.88803
1	MIA PaCa2	D14_1	0.01	1_D14_1_16	S	15	-5	-50	-0.833333	77.5069	77.5069	84.1405	0.921161
1	MIA PaCa2	D14_1	0.01	1_D14_1_16	S	16	-4	-40	-0.666667	74.7761	74.7761	82.5286	0.906063
1	MIA PaCa2	D14_1	0.01	1_D14_1_16	S	17	-3	-30	-0.5	74.2368	74.2368	83.098	0.893365
1	MIA PaCa2	D14_1	0.01	1_D14_1_16	S	18	-2	-20	-0.333333	74.0727	74.0727	82.7797	0.894817
1	MIA PaCa2	D14_1	0.01	1_D14_1_16	S	19	-1	-10	-0.166667	73.0563	73.0563	82.0129	0.89079
1	MIA PaCa2	D14_1	0.01	1_D14_1_16	S	20	0	0	0	73.1463	73.1463	81.1847	0.900986
1	MIA PaCa2	D14_1	0.01	1_D14_1_16	S	21	1	10	0.166667	77.5341	77.5341	84.5183	0.917365
1	MIA PaCa2	D14_1	0.01	1_D14_1_16	S	22	2	20	0.333333	77.8198	77.8198	82.9015	0.938702
1	MIA PaCa2	D14_1	0.01	1_D14_1_16	S	23	3	30	0.5	78.3275	78.3275	82.0655	0.954451
1	MIA PaCa2	D14_1	0.01	1_D14_1_16	S	24	4	40	0.666667	76.9051	76.9051	80.9707	0.949789
1	MIA PaCa2	D14_1	0.01	1_D14_1_16	S	25	5	50	0.833333	78.0196	78.0196	80.691	0.966894
1	MIA PaCa2	D14_1	0.01	1_D14_1_16	S	26	6	60	1	78.9119	78.9119	79.6097	0.991235
1	MIA PaCa2	D14_1	0.01	1_D14_1_16	S	27	7	70	1.16667	76.4378	76.4378	79.1117	0.966201
1	MIA PaCa2	D14_1	0.01	1_D14_1_16	S	28	8	80	1.33333	73.8085	73.8085	78.0016	0.946244
1	MIA PaCa2	D14_1	0.01	1_D14_1_16	S	29	9	90	1.5	72.0534	72.0534	77.8528	0.925508
1	MIA PaCa2	D14_1	0.01	1_D14_1_16	S	30	10	100	1.66667	72.1727	72.1727	77.6698	0.929224
1	MIA PaCa2	D14_1	0.01	1_D14_1_16	S	31	11	110	1.83333	72.9722	72.9722	77.1169	0.946254
1	MIA PaCa2	D14_1	0.01	1_D14_1_16	S	32	12	120	2	72.0407	72.0407	76.7701	0.938396
1	MIA PaCa2	D14_1	0.01	1_D14_1_16	S	33	13	130	2.16667	72.1798	72.1798	75.9843	0.94993
1	MIA PaCa2	D14_1	0.01	1_D14_1_16	S	34	14	140	2.33333	72.5197	72.5197	75.0842	0.965845
1	MIA PaCa2	D14_1	0.01	1_D14_1_16	S	35	15	150	2.5	71.6526	71.6526	75.707	0.946446
1	MIA PaCa2	D14_1	0.01	1_D14_1_16	S	36	16	160	2.66667	70.6746	70.6746	74.2775	0.951493
1	MIA PaCa2	D14_1	0.01	1_D14_1_16	S	37	17	170	2.83333	68.3486	68.3486	73.2738	0.932783
1	MIA PaCa2	D14_1	0.01	1_D14_1_16	S	38	18	180	3	67.9808	67.9808	73.1743	0.929026
1	MIA PaCa2	D14_1	0.01	1_D14_1_16	S	39	19	190	3.16667	69.4608	69.4608	72.5019	0.958054
1	MIA PaCa2	D14_1	0.01	1_D14_1_16	S	40	20	200	3.33333	66.5459	66.5459	71.7669	0.927251
1	MIA PaCa2	D14_1	0.01	1_D14_1_16	S	41	21	210	3.5	66.9192	66.9192	72.0161	0.929225
1	MIA PaCa2	D14_1	0.01	1_D14_1_16	S	42	22	220	3.66667	67.9876	67.9876	71.8185	0.946658
1	MIA PaCa2	D14_1	0.01	1_D14_1_16	S	43	23	230	3.83333	67.8926	67.8926	71.1314	0.954467
1	MIA PaCa2	D14_1	0.01	1_D14_1_16	S	44	24	240	4	67.5206	67.5206	70.5922	0.956488
1	MIA PaCa2	D14_1	0.01	1_D14_1_16	S	45	25	250	4.16667	67.0262	67.0262	70.3088	0.953312
1	MIA PaCa2	D14_1	0.01	1_D14_1_16	S	46	26	260	4.33333	66.4096	66.4096	70.5953	0.940708
1	MIA PaCa2	D14_1	0.01	1_D14_1_16	S	47	27	270	4.5	66.7507	66.7507	70.0862	0.952409
1	MIA PaCa2	D14_1	0.01	1_D14_1_16	S	48	28	280	4.66667	65.5755	65.5755	69.4746	0.943877
1	MIA PaCa2	D14_1	0.01	1_D14_1_16	S	49	29	290	4.83333	66.0237	66.0237	68.6304	0.962018
1	MIA PaCa2	D14_1	0.01	1_D14_1_16	S	50	30	300	5	64.8852	64.8852	68.8548	0.942348
1	MIA PaCa2	D14_1	0.01	1_D14_1_16	S	51	31	310	5.16667	63.062	63.062	68.1679	0.925098
1	MIA PaCa2	D14_1	0.01	1_D14_1_16	S	52	32	320	5.33333	60.2551	60.2551	67.3507	0.894647
1	MIA PaCa2	D14_1	0.01	1_D14_1_16	S	53	33	330	5.5	61.352	61.352	67.9219	0.903272
1	MIA PaCa2	D14_1	0.01	1_D14_1_16	S	54	34	340	5.66667	60.629	60.629	68.0349	0.891145
1	MIA PaCa2	D14_1	0.01	1_D14_1_16	S	55	35	350	5.83333	62.481	62.481	68.887	0.907007
1	MIA PaCa2	D14_1	0.01	1_D14_1_16	S	56	36	360	6	61.8242	61.8242	68.1633	0.907001
1	MIA PaCa2	D14_1	0.01	1_D14_1_16	S	57	37	370	6.16667	60.1484	60.1484	67.2471	0.894438
1	MIA PaCa2	D14_1	0.01	1_D14_1_16	S	58	38	380	6.33333	61.266	61.266	67.1163	0.912834
1	MIA PaCa2	D14_1	0.01	1_D14_1_16	S	59	39	390	6.5	60.5611	60.5611	66.9979	0.903926
1	MIA PaCa2	D14_1	0.01	1_D14_1_16	S	60	40	400	6.66667	60.0411	60.0411	66.8466	0.898192
1	MIA PaCa2	D14_1	0.01	1_D14_1_16	S	61	41	410	6.83333	61.0024	61.0024	66.872	0.912226
1	MIA PaCa2	D14_1	0.01	1_D14_1_16	S	62	42	420	7	61.4621	61.4621	67.4151	0.911697
1	MIA PaCa2	D14_1	0.01	1_D14_1_16	S	63	43	430	7.16667	61.9945	61.9945	66.593	0.930946
1	MIA PaCa2	D14_1	0.01	1_D14_1_16	S	64	44	440	7.33333	60.0597	60.0597	64.9413	0.924831
1	MIA PaCa2	D14_1	0.01	1_D14_1_16	S	65	45	450	7.5	62.0814	62.0814	65.8821	0.94231
1	MIA PaCa2	D14_1	0.01	1_D14_1_16	S	66	46	460	7.66667	61.7374	61.7374	65.7717	0.938663
1	MIA PaCa2	D14_1	0.01	1_D14_1_16	S	67	47	470	7.83333	61.6532	61.6532	65.9693	0.934574
1	MIA PaCa2	D14_1	0.01	1_D14_1_16	S	68	48	480	8	60.4121	60.4121	65.2461	0.925911
1	MIA PaCa2	D14_1	0.01	1_D14_1_21	S	0	-20	-200	-3.33333	109.491	109.491	102.696	1.06616
1	MIA PaCa2	D14_1	0.01	1_D14_1_21	S	1	-19	-190	-3.16667	99.5744	99.5744	98.9025	1.00679
1	MIA PaCa2	D14_1	0.01	1_D14_1_21	S	2	-18	-180	-3	95.1121	95.1121	98.287	0.967697
1	MIA PaCa2	D14_1	0.01	1_D14_1_21	S	3	-17	-170	-2.83333	91.7243	91.7243	95.5639	0.959822
1	MIA PaCa2	D14_1	0.01	1_D14_1_21	S	4	-16	-160	-2.66667	87.4017	87.4017	94.8279	0.921687
1	MIA PaCa2	D14_1	0.01	1_D14_1_21	S	5	-15	-150	-2.5	87.7761	87.7761	93.7282	0.936496
1	MIA PaCa2	D14_1	0.01	1_D14_1_21	S	6	-14	-140	-2.33333	84.8317	84.8317	91.2043	0.930128
1	MIA PaCa2	D14_1	0.01	1_D14_1_21	S	7	-13	-130	-2.16667	84.203	84.203	91.0398	0.924904
1	MIA PaCa2	D14_1	0.01	1_D14_1_21	S	8	-12	-120	-2	81.8942	81.8942	89.9628	0.910312
1	MIA PaCa2	D14_1	0.01	1_D14_1_21	S	9	-11	-110	-1.83333	81.1446	81.1446	88.8498	0.913279
1	MIA PaCa2	D14_1	0.01	1_D14_1_21	S	10	-10	-100	-1.66667	78.8504	78.8504	88.0257	0.895766
1	MIA PaCa2	D14_1	0.01	1_D14_1_21	S	11	-9	-90	-1.5	79.6971	79.6971	87.39	0.91197
1	MIA PaCa2	D14_1	0.01	1_D14_1_21	S	12	-8	-80	-1.33333	79.5973	79.5973	86.2825	0.922519
1	MIA PaCa2	D14_1	0.01	1_D14_1_21	S	13	-7	-70	-1.16667	77.8083	77.8083	84.872	0.916772
1	MIA PaCa2	D14_1	0.01	1_D14_1_21	S	14	-6	-60	-1	78.3257	78.3257	85.6506	0.914479
1	MIA PaCa2	D14_1	0.01	1_D14_1_21	S	15	-5	-50	-0.833333	75.9804	75.9804	84.1405	0.903019
1	MIA PaCa2	D14_1	0.01	1_D14_1_21	S	16	-4	-40	-0.666667	76.1532	76.1532	82.5286	0.92275
1	MIA PaCa2	D14_1	0.01	1_D14_1_21	S	17	-3	-30	-0.5	73.7417	73.7417	83.098	0.887407
1	MIA PaCa2	D14_1	0.01	1_D14_1_21	S	18	-2	-20	-0.333333	71.6239	71.6239	82.7797	0.865235
1	MIA PaCa2	D14_1	0.01	1_D14_1_21	S	19	-1	-10	-0.166667	72.4925	72.4925	82.0129	0.883916
1	MIA PaCa2	D14_1	0.01	1_D14_1_21	S	20	0	0	0	71.5901	71.5901	81.1847	0.881817
1	MIA PaCa2	D14_1	0.01	1_D14_1_21	S	21	1	10	0.166667	78.1185	78.1185	84.5183	0.924279
1	MIA PaCa2	D14_1	0.01	1_D14_1_21	S	22	2	20	0.333333	75.2531	75.2531	82.9015	0.907741
1	MIA PaCa2	D14_1	0.01	1_D14_1_21	S	23	3	30	0.5	74.9033	74.9033	82.0655	0.912725
1	MIA PaCa2	D14_1	0.01	1_D14_1_21	S	24	4	40	0.666667	72.7433	72.7433	80.9707	0.89839
1	MIA PaCa2	D14_1	0.01	1_D14_1_21	S	25	5	50	0.833333	73.6448	73.6448	80.691	0.912677
1	MIA PaCa2	D14_1	0.01	1_D14_1_21	S	26	6	60	1	74.4475	74.4475	79.6097	0.935156
1	MIA PaCa2	D14_1	0.01	1_D14_1_21	S	27	7	70	1.16667	74.0031	74.0031	79.1117	0.935426
1	MIA PaCa2	D14_1	0.01	1_D14_1_21	S	28	8	80	1.33333	71.4186	71.4186	78.0016	0.915605
1	MIA PaCa2	D14_1	0.01	1_D14_1_21	S	29	9	90	1.5	69.7335	69.7335	77.8528	0.89571
1	MIA PaCa2	D14_1	0.01	1_D14_1_21	S	32	12	120	2	74.9914	74.9914	76.7701	0.976831
1	MIA PaCa2	D14_1	0.01	1_D14_1_21	S	34	14	140	2.33333	66.5494	66.5494	75.0842	0.88633
1	MIA PaCa2	D14_1	0.01	1_D14_1_21	S	36	16	160	2.66667	71.6512	71.6512	74.2775	0.964641
1	MIA PaCa2	D14_1	0.01	1_D14_1_21	S	38	18	180	3	71.171	71.171	73.1743	0.972623
1	MIA PaCa2	D14_1	0.01	1_D14_1_21	S	39	19	190	3.16667	70.5783	70.5783	72.5019	0.973468
1	MIA PaCa2	D14_1	0.01	1_D14_1_21	S	40	20	200	3.33333	67.9201	67.9201	71.7669	0.946399
1	MIA PaCa2	D14_1	0.01	1_D14_1_21	S	41	21	210	3.5	68.4551	68.4551	72.0161	0.950552
1	MIA PaCa2	D14_1	0.01	1_D14_1_21	S	42	22	220	3.66667	68.2216	68.2216	71.8185	0.949916
1	MIA PaCa2	D14_1	0.01	1_D14_1_21	S	43	23	230	3.83333	67.3805	67.3805	71.1314	0.947268
1	MIA PaCa2	D14_1	0.01	1_D14_1_21	S	44	24	240	4	65.8295	65.8295	70.5922	0.932532
1	MIA PaCa2	D14_1	0.01	1_D14_1_21	S	45	25	250	4.16667	66.295	66.295	70.3088	0.942912
1	MIA PaCa2	D14_1	0.01	1_D14_1_21	S	46	26	260	4.33333	66.0556	66.0556	70.5953	0.935694
1	MIA PaCa2	D14_1	0.01	1_D14_1_21	S	47	27	270	4.5	69.4841	69.4841	70.0862	0.99141
1	MIA PaCa2	D14_1	0.01	1_D14_1_21	S	48	28	280	4.66667	72.538	72.538	69.4746	1.04409
1	MIA PaCa2	D14_1	0.01	1_D14_1_21	S	49	29	290	4.83333	70.5625	70.5625	68.6304	1.02815
1	MIA PaCa2	D14_1	0.01	1_D14_1_21	S	50	30	300	5	68.2389	68.2389	68.8548	0.991055
1	MIA PaCa2	D14_1	0.01	1_D14_1_21	S	51	31	310	5.16667	70.0306	70.0306	68.1679	1.02733
1	MIA PaCa2	D14_1	0.01	1_D14_1_21	S	52	32	320	5.33333	79.0033	79.0033	67.3507	1.17301
1	MIA PaCa2	D14_1	0.01	1_D14_1_21	S	53	33	330	5.5	77.9021	77.9021	67.9219	1.14694
1	MIA PaCa2	D14_1	0.01	1_D14_1_21	S	54	34	340	5.66667	72.6498	72.6498	68.0349	1.06783
1	MIA PaCa2	D14_1	0.01	1_D14_1_21	S	55	35	350	5.83333	78.1541	78.1541	68.887	1.13453
1	MIA PaCa2	D14_1	0.01	1_D14_1_21	S	56	36	360	6	74.717	74.717	68.1633	1.09615
1	MIA PaCa2	D14_1	0.01	1_D14_1_21	S	57	37	370	6.16667	73.6361	73.6361	67.2471	1.09501
1	MIA PaCa2	D14_1	0.01	1_D14_1_21	S	58	38	380	6.33333	75.9966	75.9966	67.1163	1.13231
1	MIA PaCa2	D14_1	0.01	1_D14_1_21	S	59	39	390	6.5	72.7726	72.7726	66.9979	1.08619
1	MIA PaCa2	D14_1	0.01	1_D14_1_21	S	60	40	400	6.66667	74.4463	74.4463	66.8466	1.11369
1	MIA PaCa2	D14_1	0.01	1_D14_1_21	S	61	41	410	6.83333	76.6846	76.6846	66.872	1.14674
1	MIA PaCa2	D14_1	0.01	1_D14_1_21	S	62	42	420	7	71.2716	71.2716	67.4151	1.05721
1	MIA PaCa2	D14_1	0.01	1_D14_1_21	S	63	43	430	7.16667	73.1037	73.1037	66.593	1.09777
1	MIA PaCa2	D14_1	0.01	1_D14_1_21	S	64	44	440	7.33333	74.7267	74.7267	64.9413	1.15068
1	MIA PaCa2	D14_1	0.01	1_D14_1_9	S	16	-4	-40	-0.666667	74.3005	74.3005	82.5286	0.900301
1	MIA PaCa2	D14_1	0.01	1_D14_1_9	S	17	-3	-30	-0.5	75.3946	75.3946	83.098	0.907298
1	MIA PaCa2	D14_1	0.01	1_D14_1_9	S	19	-1	-10	-0.166667	70.2486	70.2486	82.0129	0.856556
1	MIA PaCa2	D14_1	0.01	1_D14_1_9	S	20	0	0	0	71.0106	71.0106	81.1847	0.874679
1	MIA PaCa2	D14_1	0.01	1_D14_1_9	S	21	1	10	0.166667	76.9561	76.9561	84.5183	0.910526
1	MIA PaCa2	D14_1	0.01	1_D14_1_9	S	22	2	20	0.333333	74.2434	74.2434	82.9015	0.895561
1	MIA PaCa2	D14_1	0.01	1_D14_1_9	S	23	3	30	0.5	76.5606	76.5606	82.0655	0.93292
1	MIA PaCa2	D14_1	0.01	1_D14_1_9	S	24	4	40	0.666667	72.94	72.94	80.9707	0.900819
1	MIA PaCa2	D14_1	0.01	1_D14_1_9	S	25	5	50	0.833333	75.8488	75.8488	80.691	0.939991
1	MIA PaCa2	D14_1	0.01	1_D14_1_9	S	26	6	60	1	73.2271	73.2271	79.6097	0.919826
1	MIA PaCa2	D14_1	0.01	1_D14_1_9	S	27	7	70	1.16667	70.9841	70.9841	79.1117	0.897265
1	MIA PaCa2	D14_1	0.01	1_D14_1_9	S	28	8	80	1.33333	70.1542	70.1542	78.0016	0.899395
1	MIA PaCa2	D14_1	0.01	1_D14_1_9	S	29	9	90	1.5	69.766	69.766	77.8528	0.896127
1	MIA PaCa2	D14_1	0.01	1_D14_1_9	S	30	10	100	1.66667	69.8731	69.8731	77.6698	0.899617
1	MIA PaCa2	D14_1	0.01	1_D14_1_9	S	31	11	110	1.83333	72.2648	72.2648	77.1169	0.937081
1	MIA PaCa2	D14_1	0.01	1_D14_1_9	S	32	12	120	2	70.972	70.972	76.7701	0.924475
1	MIA PaCa2	D14_1	0.01	1_D14_1_9	S	33	13	130	2.16667	71.427	71.427	75.9843	0.940023
1	MIA PaCa2	D14_1	0.01	1_D14_1_9	S	34	14	140	2.33333	71.7148	71.7148	75.0842	0.955125
1	MIA PaCa2	D14_1	0.01	1_D14_1_9	S	35	15	150	2.5	68.979	68.979	75.707	0.911131
1	MIA PaCa2	D14_1	0.01	1_D14_1_9	S	36	16	160	2.66667	65.9138	65.9138	74.2775	0.887399
1	MIA PaCa2	D14_1	0.01	1_D14_1_9	S	37	17	170	2.83333	67.6036	67.6036	73.2738	0.922616
1	MIA PaCa2	D14_1	0.01	1_D14_1_9	S	38	18	180	3	68.2432	68.2432	73.1743	0.932612
1	MIA PaCa2	D14_1	0.01	1_D14_1_9	S	39	19	190	3.16667	66.8197	66.8197	72.5019	0.921626
1	MIA PaCa2	D14_1	0.01	1_D14_1_9	S	40	20	200	3.33333	69.202	69.202	71.7669	0.964261
1	MIA PaCa2	D14_1	0.01	1_D14_1_9	S	41	21	210	3.5	69.7938	69.7938	72.0161	0.969141
1	MIA PaCa2	D14_1	0.01	1_D14_1_9	S	42	22	220	3.66667	69.5451	69.5451	71.8185	0.968345
1	MIA PaCa2	D14_1	0.01	1_D14_1_9	S	43	23	230	3.83333	70.0197	70.0197	71.1314	0.984371
1	MIA PaCa2	D14_1	0.01	1_D14_1_9	S	44	24	240	4	68.7411	68.7411	70.5922	0.973778
1	MIA PaCa2	D14_1	0.01	1_D14_1_9	S	45	25	250	4.16667	68.9305	68.9305	70.3088	0.980396
1	MIA PaCa2	D14_1	0.01	1_D14_1_9	S	46	26	260	4.33333	66.9966	66.9966	70.5953	0.949023
1	MIA PaCa2	D14_1	0.01	1_D14_1_9	S	47	27	270	4.5	66.1003	66.1003	70.0862	0.943129
1	MIA PaCa2	D14_1	0.01	1_D14_1_9	S	48	28	280	4.66667	65.3183	65.3183	69.4746	0.940175
1	MIA PaCa2	D14_1	0.01	1_D14_1_9	S	49	29	290	4.83333	66.981	66.981	68.6304	0.975967
1	MIA PaCa2	D14_1	0.01	1_D14_1_9	S	50	30	300	5	67.1295	67.1295	68.8548	0.974942
1	MIA PaCa2	D14_1	0.01	1_D14_1_9	S	51	31	310	5.16667	63.943	63.943	68.1679	0.938022
1	MIA PaCa2	D14_1	0.01	1_D14_1_9	S	52	32	320	5.33333	67.432	67.432	67.3507	1.00121
1	MIA PaCa2	D14_1	0.01	1_D14_1_9	S	53	33	330	5.5	69.1863	69.1863	67.9219	1.01861
1	MIA PaCa2	D14_1	0.01	1_D14_1_9	S	54	34	340	5.66667	67.4803	67.4803	68.0349	0.991848
1	MIA PaCa2	D14_1	0.01	1_D14_1_9	S	55	35	350	5.83333	65.0602	65.0602	68.887	0.944448
1	MIA PaCa2	D14_1	0.01	1_D14_1_9	S	56	36	360	6	64.6223	64.6223	68.1633	0.948051
1	MIA PaCa2	D14_1	0.01	1_D14_1_9	S	57	37	370	6.16667	65.0804	65.0804	67.2471	0.967779
1	MIA PaCa2	D14_1	0.01	1_D14_1_9	S	58	38	380	6.33333	64.898	64.898	67.1163	0.966949
1	MIA PaCa2	D14_1	0.01	1_D14_1_9	S	59	39	390	6.5	63.8301	63.8301	66.9979	0.952718
1	MIA PaCa2	D14_1	0.01	1_D14_1_9	S	60	40	400	6.66667	63.6738	63.6738	66.8466	0.952535
1	MIA PaCa2	D14_1	0.01	1_D14_1_9	S	61	41	410	6.83333	64.2102	64.2102	66.872	0.960196
1	MIA PaCa2	D14_1	0.01	1_D14_1_9	S	62	42	420	7	62.2222	62.2222	67.4151	0.922971
1	MIA PaCa2	D14_1	0.01	1_D14_1_9	S	63	43	430	7.16667	62.9043	62.9043	66.593	0.944608
1	MIA PaCa2	D14_1	0.01	1_D14_1_9	S	64	44	440	7.33333	61.35	61.35	64.9413	0.944699
1	MIA PaCa2	D14_1	0.01	1_D14_1_9	S	65	45	450	7.5	63.1024	63.1024	65.8821	0.957808
1	MIA PaCa2	D14_1	0.01	1_D14_1_9	S	66	46	460	7.66667	63.9933	63.9933	65.7717	0.972962
1	MIA PaCa2	D14_1	0.01	1_D14_1_9	S	67	47	470	7.83333	62.6055	62.6055	65.9693	0.94901
1	MIA PaCa2	D14_1	0.01	1_D14_1_9	S	68	48	480	8	61.4651	61.4651	65.2461	0.94205
1	MIA PaCa2	D14_1	0.01	1_D14_1_9	S	69	49	490	8.16667	58.9281	58.9281	64.9541	0.907226
1	MIA PaCa2	D14_1	0.01	1_D14_1_9	S	70	50	500	8.33333	58.6076	58.6076	64.7238	0.905503
1	MIA PaCa2	D14_1	0.01	1_D14_1_9	S	71	51	510	8.5	60.5144	60.5144	64.8745	0.932792
1	MIA PaCa2	D14_1	0.01	1_D14_1_9	S	72	52	520	8.66667	61.3158	61.3158	65.0075	0.943211
1	MIA PaCa2	D14_1	0.01	1_D14_1_9	S	73	53	530	8.83333	63.2801	63.2801	64.3036	0.984083
1	MIA PaCa2	D14_1	0.01	1_D14_1_9	S	74	54	540	9	61.5759	61.5759	64.0165	0.961876
1	MIA PaCa2	D14_1	0.01	1_D14_1_9	S	75	55	550	9.16667	61.966	61.966	64.712	0.957566
1	MIA PaCa2	D14_1	0.01	1_D14_1_9	S	76	56	560	9.33333	61.3221	61.3221	64.0422	0.957526
1	MIA PaCa2	D14_1	0.01	1_D14_1_9	S	77	57	570	9.5	60.6053	60.6053	63.8764	0.94879
1	MIA PaCa2	D14_1	0.01	1_D14_1_9	S	78	58	580	9.66667	60.0392	60.0392	63.7423	0.941906
1	MIA PaCa2	D14_1	0.01	1_D14_1_9	S	79	59	590	9.83333	58.645	58.645	63.4249	0.924637
1	MIA PaCa2	D14_1	0.01	1_D14_1_9	S	80	60	600	10	59.8261	59.8261	63.1512	0.947347
1	MIA PaCa2	D14_1	0.01	1_D14_1_9	S	81	61	610	10.1667	57.9468	57.9468	63.2666	0.915915
1	MIA PaCa2	D14_1	0.01	1_D14_1_9	S	82	62	620	10.3333	59.9192	59.9192	62.8471	0.953412
1	MIA PaCa2	D14_1	0.01	1_D14_1_9	S	83	63	630	10.5	60.3389	60.3389	62.9485	0.958543
1	MIA PaCa2	D14_1	0.01	1_D14_1_9	S	84	64	640	10.6667	60.4242	60.4242	63.5908	0.950204
1	MIA PaCa2	D14_1	0.01	1_D14_1_9	S	85	65	650	10.8333	60.0627	60.0627	63.0209	0.953059
1	MIA PaCa2	D14_1	0.01	1_D14_1_9	S	86	66	660	11	60.955	60.955	63.2933	0.963056
1	MIA PaCa2	D14_1	0.01	1_D14_1_9	S	87	67	670	11.1667	59.8333	59.8333	61.9681	0.96555
1	MIA PaCa2	D14_1	0.01	1_D14_1_9	S	88	68	680	11.3333	57.7801	57.7801	61.0898	0.945823
1	MIA PaCa2	D14_1	0.01	1_D14_1_9	S	89	69	690	11.5	57.5651	57.5651	61.5941	0.934588
1	MIA PaCa2	D14_1	0.01	1_D14_1_9	S	90	70	700	11.6667	57.51	57.51	62.8735	0.914694
1	MIA PaCa2	D14_1	0.01	1_D14_1_9	S	91	71	710	11.8333	58.3741	58.3741	61.5615	0.948225
1	MIA PaCa2	D14_1	0.01	1_D14_1_9	S	92	72	720	12	59.6135	59.6135	60.7859	0.980712
1	MIA PaCa2	D14_1	0.01	1_D14_1_9	S	93	73	730	12.1667	58.5315	58.5315	60.8609	0.961726
1	MIA PaCa2	D14_1	0.01	1_D14_1_9	S	94	74	740	12.3333	59.656	59.656	60.9904	0.978122
1	MIA PaCa2	D14_1	0.01	1_D14_1_9	S	95	75	750	12.5	60.5199	60.5199	61.556	0.983168
1	MIA PaCa2	D14_1	0.01	1_D14_1_9	S	96	76	760	12.6667	60.9513	60.9513	61.3403	0.993658
1	MIA PaCa2	D14_1	0.01	1_D14_1_9	S	97	77	770	12.8333	64.7375	64.7375	61.6391	1.05027
1	MIA PaCa2	D14_1	0.01	1_D14_1_9	S	98	78	780	13	62.4652	62.4652	60.4758	1.0329
1	MIA PaCa2	D14_1	0.01	1_D14_1_9	S	99	79	790	13.1667	58.646	58.646	60.3963	0.97102
1	MIA PaCa2	D14_1	0.01	1_D14_1_9	S	100	80	800	13.3333	56.6388	56.6388	60.7884	0.931736
1	MIA PaCa2	D14_1	0.01	1_D14_1_9	S	101	81	810	13.5	54.607	54.607	60.3059	0.9055
1	MIA PaCa2	D14_1	0.01	1_D14_1_9	S	102	82	820	13.6667	55.5909	55.5909	60.7794	0.914633
1	MIA PaCa2	D14_1	0.01	1_D14_1_9	S	103	83	830	13.8333	56.5016	56.5016	60.5056	0.933824
1	MIA PaCa2	D14_1	0.01	1_D14_1_9	S	104	84	840	14	54.823	54.823	59.623	0.919494
1	MIA PaCa2	D14_1	0.01	1_D14_1_9	S	105	85	850	14.1667	56.3816	56.3816	59.3892	0.949358
1	MIA PaCa2	D14_1	0.01	1_D14_1_9	S	106	86	860	14.3333	54.9281	54.9281	59.9458	0.916297
1	MIA PaCa2	D14_1	0.01	1_D14_1_9	S	107	87	870	14.5	54.4885	54.4885	59.293	0.91897
1	MIA PaCa2	D14_1	0.01	1_D14_1_9	S	108	88	880	14.6667	54.0164	54.0164	59.7326	0.904303
1	MIA PaCa2	D14_1	0.01	1_D14_1_9	S	109	89	890	14.8333	54.0922	54.0922	59.2145	0.913496
1	MIA PaCa2	D14_1	0.01	1_D14_1_9	S	110	90	900	15	54.934	54.934	59.5265	0.922849
1	MIA PaCa2	D14_1	0.01	1_D14_1_9	S	111	91	910	15.1667	59.5328	59.5328	22.61	2.63303
1	MIA PaCa2	D14_1	0.01	1_D14_1_9	S	112	92	920	15.3333	24.0868	24.0868	22.6798	1.06204
1	MIA PaCa2	D14_1	0.01	1_D14_1_9	S	113	93	930	15.5	23.3346	23.3346	22.7253	1.02681
1	MIA PaCa2	D14_1	0.01	1_D14_1_9	S	114	94	940	15.6667	22.4903	22.4903	22.5639	0.99674
1	MIA PaCa2	D14_1	0.01	1_D14_1_9	S	115	95	950	15.8333	21.5114	21.5114	22.4399	0.958622
1	MIA PaCa2	D14_1	0.01	1_D14_1_9	S	116	96	960	16	22.689	22.689	22.771	0.996398
1	MIA PaCa2	D14_1	0.01	1_D14_1_9	S	117	97	970	16.1667	23.0662	23.0662	22.6665	1.01763
1	MIA PaCa2	D14_1	0.01	1_D14_1_9	S	118	98	980	16.3333	21.8504	21.8504	23.0617	0.947475
1	MIA PaCa2	D14_1	0.01	1_D14_1_9	S	119	99	990	16.5	24.4324	24.4324	22.7043	1.07612
1	MIA PaCa2	D14_1	0.01	1_D14_1_9	S	120	100	1000	16.6667	26.1399	26.1399	22.9546	1.13876
1	MIA PaCa2	D14_1	0.01	1_D14_1_9	S	121	101	1010	16.8333	25.1855	25.1855	23.1818	1.08643
1	MIA PaCa2	D14_1	0.01	1_D14_1_9	S	122	102	1020	17	24.9343	24.9343	22.9702	1.08551
1	MIA PaCa2	D14_1	0.01	1_D14_1_9	S	123	103	1030	17.1667	24.2713	24.2713	22.8295	1.06315
1	MIA PaCa2	D14_1	0.01	1_D14_1_9	S	124	104	1040	17.3333	22.2917	22.2917	22.8913	0.973808
1	MIA PaCa2	D14_1	0.01	1_D14_1_9	S	125	105	1050	17.5	22.2372	22.2372	22.9525	0.968837
1	MIA PaCa2	D14_1	0.01	1_D14_1_9	S	126	106	1060	17.6667	23.0901	23.0901	23.5781	0.979302
1	MIA PaCa2	D14_1	0.01	1_D14_1_9	S	127	107	1070	17.8333	23.0078	23.0078	23.1748	0.992793
1	MIA PaCa2	D14_1	0.01	1_D14_1_9	S	128	108	1080	18	23.6308	23.6308	22.9786	1.02838
1	MIA PaCa2	D14_1	0.01	1_D14_1_9	S	129	109	1090	18.1667	22.9357	22.9357	22.8524	1.00365
1	MIA PaCa2	D14_1	0.01	1_D14_1_9	S	130	110	1100	18.3333	23.0253	23.0253	22.9516	1.00321
1	MIA PaCa2	D14_1	0.01	1_D14_1_9	S	131	111	1110	18.5	23.3348	23.3348	22.9183	1.01817
1	MIA PaCa2	D14_1	0.01	1_D14_1_9	S	132	112	1120	18.6667	22.8435	22.8435	22.8756	0.998599
1	MIA PaCa2	D14_3	0.01	1_D14_3_12	G1	0	-20	-200	-3.33333	108.481	108.481	102.696	1.05633
1	MIA PaCa2	D14_3	0.01	1_D14_3_12	G1	1	-19	-190	-3.16667	102.247	102.247	98.9025	1.03382
1	MIA PaCa2	D14_3	0.01	1_D14_3_12	G1	2	-18	-180	-3	104.455	104.455	98.287	1.06276
1	MIA PaCa2	D14_3	0.01	1_D14_3_12	G1	3	-17	-170	-2.83333	100.45	100.45	95.5639	1.05113
1	MIA PaCa2	D14_3	0.01	1_D14_3_12	G1	4	-16	-160	-2.66667	98.5836	98.5836	94.8279	1.03961
1	MIA PaCa2	D14_3	0.01	1_D14_3_12	G1	5	-15	-150	-2.5	100.238	100.238	93.7282	1.06945
1	MIA PaCa2	D14_3	0.01	1_D14_3_12	G1	6	-14	-140	-2.33333	94.5583	94.5583	91.2043	1.03677
1	MIA PaCa2	D14_3	0.01	1_D14_3_12	G1	7	-13	-130	-2.16667	97.5556	97.5556	91.0398	1.07157
1	MIA PaCa2	D14_3	0.01	1_D14_3_12	G1	8	-12	-120	-2	92.4548	92.4548	89.9628	1.0277
1	MIA PaCa2	D14_3	0.01	1_D14_3_12	G1	9	-11	-110	-1.83333	89.7687	89.7687	88.8498	1.01034
1	MIA PaCa2	D14_3	0.01	1_D14_3_12	G1	10	-10	-100	-1.66667	92.4319	92.4319	88.0257	1.05006
1	MIA PaCa2	D14_3	0.01	1_D14_3_12	G1	11	-9	-90	-1.5	92.7469	92.7469	87.39	1.0613
1	MIA PaCa2	D14_3	0.01	1_D14_3_12	G1	12	-8	-80	-1.33333	90.4863	90.4863	86.2825	1.04872
1	MIA PaCa2	D14_3	0.01	1_D14_3_12	G1	13	-7	-70	-1.16667	90.8774	90.8774	84.872	1.07076
1	MIA PaCa2	D14_3	0.01	1_D14_3_12	G1	14	-6	-60	-1	91.538	91.538	85.6506	1.06874
1	MIA PaCa2	D14_3	0.01	1_D14_3_12	G1	15	-5	-50	-0.833333	92.3723	92.3723	84.1405	1.09783
1	MIA PaCa2	D14_3	0.01	1_D14_3_12	G1	16	-4	-40	-0.666667	90.5	90.5	82.5286	1.09659
1	MIA PaCa2	D14_3	0.01	1_D14_3_12	G1	17	-3	-30	-0.5	89.5985	89.5985	83.098	1.07823
1	MIA PaCa2	D14_3	0.01	1_D14_3_12	G1	18	-2	-20	-0.333333	87.032	87.032	82.7797	1.05137
1	MIA PaCa2	D14_3	0.01	1_D14_3_12	G1	19	-1	-10	-0.166667	88.6037	88.6037	82.0129	1.08036
1	MIA PaCa2	D14_3	0.01	1_D14_3_12	G1	20	0	0	0	81.7509	81.7509	81.1847	1.00697
1	MIA PaCa2	D14_3	0.01	1_D14_3_12	G1	21	1	10	0.166667	84.2586	84.2586	84.5183	0.996927
1	MIA PaCa2	D14_3	0.01	1_D14_3_12	G1	22	2	20	0.333333	85.3922	85.3922	82.9015	1.03004
1	MIA PaCa2	D14_3	0.01	1_D14_3_12	G1	23	3	30	0.5	88.2774	88.2774	82.0655	1.07569
1	MIA PaCa2	D14_3	0.01	1_D14_3_12	G1	24	4	40	0.666667	83.5949	83.5949	80.9707	1.03241
1	MIA PaCa2	D14_3	0.01	1_D14_3_12	G1	25	5	50	0.833333	84.9253	84.9253	80.691	1.05248
1	MIA PaCa2	D14_3	0.01	1_D14_3_12	G1	26	6	60	1	79.1268	79.1268	79.6097	0.993934
1	MIA PaCa2	D14_3	0.01	1_D14_3_12	G1	27	7	70	1.16667	81.8626	81.8626	79.1117	1.03477
1	MIA PaCa2	D14_3	0.01	1_D14_3_12	G1	28	8	80	1.33333	84.1377	84.1377	78.0016	1.07867
1	MIA PaCa2	D14_3	0.01	1_D14_3_12	G1	29	9	90	1.5	80.9363	80.9363	77.8528	1.03961
1	MIA PaCa2	D14_3	0.01	1_D14_3_12	G1	30	10	100	1.66667	82.083	82.083	77.6698	1.05682
1	MIA PaCa2	D14_3	0.01	1_D14_3_12	G1	31	11	110	1.83333	78.2428	78.2428	77.1169	1.0146
1	MIA PaCa2	D14_3	0.01	1_D14_3_12	G1	32	12	120	2	80.2289	80.2289	76.7701	1.04505
1	MIA PaCa2	D14_3	0.01	1_D14_3_12	G1	33	13	130	2.16667	78.3908	78.3908	75.9843	1.03167
1	MIA PaCa2	D14_3	0.01	1_D14_3_12	G1	34	14	140	2.33333	78.1082	78.1082	75.0842	1.04027
1	MIA PaCa2	D14_3	0.01	1_D14_3_12	G1	35	15	150	2.5	81.2784	81.2784	75.707	1.07359
1	MIA PaCa2	D14_3	0.01	1_D14_3_12	G1	36	16	160	2.66667	79.0925	79.0925	74.2775	1.06482
1	MIA PaCa2	D14_3	0.01	1_D14_3_12	G1	37	17	170	2.83333	75.629	75.629	73.2738	1.03214
1	MIA PaCa2	D14_3	0.01	1_D14_3_12	G1	38	18	180	3	83.8366	83.8366	73.1743	1.14571
1	MIA PaCa2	D14_3	0.01	1_D14_3_12	G1	39	19	190	3.16667	81.6052	81.6052	72.5019	1.12556
1	MIA PaCa2	D14_3	0.01	1_D14_3_12	G1	40	20	200	3.33333	76.5259	76.5259	71.7669	1.06631
1	MIA PaCa2	D14_3	0.01	1_D14_3_12	G1	41	21	210	3.5	79.8556	79.8556	72.0161	1.10886
1	MIA PaCa2	D14_3	0.01	1_D14_3_12	G1	42	22	220	3.66667	83.1567	83.1567	71.8185	1.15787
1	MIA PaCa2	D14_3	0.01	1_D14_3_12	G1	43	23	230	3.83333	86.0898	86.0898	71.1314	1.21029
1	MIA PaCa2	D14_3	0.01	1_D14_3_12	G1	44	24	240	4	91.9651	91.9651	70.5922	1.30277
1	MIA PaCa2	D14_3	0.01	1_D14_3_12	G1	45	25	250	4.16667	99.4783	99.4783	70.3088	1.41488
1	MIA PaCa2	D14_3	0.01	1_D14_3_15	G2	0	-20	-200	-3.33333	101.309	101.309	102.696	0.986497
1	MIA PaCa2	D14_3	0.01	1_D14_3_15	G2	1	-19	-190	-3.16667	100.652	100.652	98.9025	1.01769
1	MIA PaCa2	D14_3	0.01	1_D14_3_15	G2	2	-18	-180	-3	98.4636	98.4636	98.287	1.0018
1	MIA PaCa2	D14_3	0.01	1_D14_3_15	G2	3	-17	-170	-2.83333	97.7217	97.7217	95.5639	1.02258
1	MIA PaCa2	D14_3	0.01	1_D14_3_15	G2	4	-16	-160	-2.66667	95.9586	95.9586	94.8279	1.01192
1	MIA PaCa2	D14_3	0.01	1_D14_3_15	G2	5	-15	-150	-2.5	93.6446	93.6446	93.7282	0.999108
1	MIA PaCa2	D14_3	0.01	1_D14_3_15	G2	6	-14	-140	-2.33333	91.7794	91.7794	91.2043	1.00631
1	MIA PaCa2	D14_3	0.01	1_D14_3_15	G2	7	-13	-130	-2.16667	90.5852	90.5852	91.0398	0.995007
1	MIA PaCa2	D14_3	0.01	1_D14_3_15	G2	8	-12	-120	-2	89.7275	89.7275	89.9628	0.997384
1	MIA PaCa2	D14_3	0.01	1_D14_3_15	G2	9	-11	-110	-1.83333	89.4593	89.4593	88.8498	1.00686
1	MIA PaCa2	D14_3	0.01	1_D14_3_15	G2	10	-10	-100	-1.66667	87.7295	87.7295	88.0257	0.996635
1	MIA PaCa2	D14_3	0.01	1_D14_3_15	G2	11	-9	-90	-1.5	87.4558	87.4558	87.39	1.00075
1	MIA PaCa2	D14_3	0.01	1_D14_3_15	G2	12	-8	-80	-1.33333	85.1243	85.1243	86.2825	0.986576
1	MIA PaCa2	D14_3	0.01	1_D14_3_15	G2	13	-7	-70	-1.16667	83.5082	83.5082	84.872	0.983931
1	MIA PaCa2	D14_3	0.01	1_D14_3_15	G2	14	-6	-60	-1	83.0345	83.0345	85.6506	0.969456
1	MIA PaCa2	D14_3	0.01	1_D14_3_15	G2	15	-5	-50	-0.833333	82.739	82.739	84.1405	0.983344
1	MIA PaCa2	D14_3	0.01	1_D14_3_15	G2	16	-4	-40	-0.666667	81.5405	81.5405	82.5286	0.988028
1	MIA PaCa2	D14_3	0.01	1_D14_3_15	G2	17	-3	-30	-0.5	82.2683	82.2683	83.098	0.990016
1	MIA PaCa2	D14_3	0.01	1_D14_3_15	G2	18	-2	-20	-0.333333	80.5643	80.5643	82.7797	0.973237
1	MIA PaCa2	D14_3	0.01	1_D14_3_15	G2	19	-1	-10	-0.166667	81.5662	81.5662	82.0129	0.994553
1	MIA PaCa2	D14_3	0.01	1_D14_3_15	G2	20	0	0	0	80.6031	80.6031	81.1847	0.992836
1	MIA PaCa2	D14_3	0.01	1_D14_3_15	G2	21	1	10	0.166667	85.3333	85.3333	84.5183	1.00964
1	MIA PaCa2	D14_3	0.01	1_D14_3_15	G2	22	2	20	0.333333	85.3598	85.3598	82.9015	1.02965
1	MIA PaCa2	D14_3	0.01	1_D14_3_15	G2	23	3	30	0.5	86.7202	86.7202	82.0655	1.05672
1	MIA PaCa2	D14_3	0.01	1_D14_3_15	G2	24	4	40	0.666667	90.9847	90.9847	80.9707	1.12367
1	MIA PaCa2	D14_3	0.01	1_D14_3_15	G2	25	5	50	0.833333	95.1083	95.1083	80.691	1.17867
1	MIA PaCa2	D14_3	0.01	1_D14_3_15	G2	26	6	60	1	96.3115	96.3115	79.6097	1.2098
1	MIA PaCa2	D14_3	0.01	1_D14_3_15	G2	27	7	70	1.16667	94.6031	94.6031	79.1117	1.19582
1	MIA PaCa2	D14_3	0.01	1_D14_3_15	G2	28	8	80	1.33333	93.17	93.17	78.0016	1.19446
1	MIA PaCa2	D14_3	0.01	1_D14_3_15	G2	29	9	90	1.5	89.2108	89.2108	77.8528	1.14589
1	MIA PaCa2	D14_3	0.01	1_D14_3_15	G2	30	10	100	1.66667	87.75	87.75	77.6698	1.12978
1	MIA PaCa2	D14_3	0.01	1_D14_3_15	G2	31	11	110	1.83333	85.6228	85.6228	77.1169	1.1103
1	MIA PaCa2	D14_3	0.01	1_D14_3_15	G2	32	12	120	2	84.6109	84.6109	76.7701	1.10213
1	MIA PaCa2	D14_3	0.01	1_D14_3_15	G2	33	13	130	2.16667	84.5396	84.5396	75.9843	1.11259
1	MIA PaCa2	D14_3	0.01	1_D14_3_5	G2	1	-19	-190	-3.16667	94.1194	94.1194	98.9025	0.951638
1	MIA PaCa2	D14_3	0.01	1_D14_3_5	G2	2	-18	-180	-3	94.6972	94.6972	98.287	0.963476
1	MIA PaCa2	D14_3	0.01	1_D14_3_5	G2	3	-17	-170	-2.83333	90.3505	90.3505	95.5639	0.945446
1	MIA PaCa2	D14_3	0.01	1_D14_3_5	G2	4	-16	-160	-2.66667	89.1854	89.1854	94.8279	0.940497
1	MIA PaCa2	D14_3	0.01	1_D14_3_5	G2	5	-15	-150	-2.5	89.6856	89.6856	93.7282	0.956869
1	MIA PaCa2	D14_3	0.01	1_D14_3_5	G2	6	-14	-140	-2.33333	89.3162	89.3162	91.2043	0.979298
1	MIA PaCa2	D14_3	0.01	1_D14_3_5	G2	7	-13	-130	-2.16667	88.082	88.082	91.0398	0.967511
1	MIA PaCa2	D14_3	0.01	1_D14_3_5	G2	8	-12	-120	-2	85.3091	85.3091	89.9628	0.948271
1	MIA PaCa2	D14_3	0.01	1_D14_3_5	G2	9	-11	-110	-1.83333	85.5101	85.5101	88.8498	0.962412
1	MIA PaCa2	D14_3	0.01	1_D14_3_5	G2	10	-10	-100	-1.66667	87.0632	87.0632	88.0257	0.989066
1	MIA PaCa2	D14_3	0.01	1_D14_3_5	G2	11	-9	-90	-1.5	86.5071	86.5071	87.39	0.989897
1	MIA PaCa2	D14_3	0.01	1_D14_3_5	G2	12	-8	-80	-1.33333	82.7275	82.7275	86.2825	0.958798
1	MIA PaCa2	D14_3	0.01	1_D14_3_5	G2	13	-7	-70	-1.16667	82.1734	82.1734	84.872	0.968204
1	MIA PaCa2	D14_3	0.01	1_D14_3_5	G2	14	-6	-60	-1	81.3085	81.3085	85.6506	0.949305
1	MIA PaCa2	D14_3	0.01	1_D14_3_5	G2	15	-5	-50	-0.833333	83.7775	83.7775	84.1405	0.995686
1	MIA PaCa2	D14_3	0.01	1_D14_3_5	G2	16	-4	-40	-0.666667	81.9596	81.9596	82.5286	0.993106
1	MIA PaCa2	D14_3	0.01	1_D14_3_5	G2	17	-3	-30	-0.5	80.6306	80.6306	83.098	0.970307
1	MIA PaCa2	D14_3	0.01	1_D14_3_5	G2	18	-2	-20	-0.333333	78.6925	78.6925	82.7797	0.950625
1	MIA PaCa2	D14_3	0.01	1_D14_3_5	G2	19	-1	-10	-0.166667	76.965	76.965	82.0129	0.93845
1	MIA PaCa2	D14_3	0.01	1_D14_3_5	G2	20	0	0	0	77.5925	77.5925	81.1847	0.955752
1	MIA PaCa2	D14_3	0.01	1_D14_3_5	G2	21	1	10	0.166667	79.8603	79.8603	84.5183	0.944888
1	MIA PaCa2	D14_3	0.01	1_D14_3_5	G2	22	2	20	0.333333	79.664	79.664	82.9015	0.960947
1	MIA PaCa2	D14_3	0.01	1_D14_3_5	G2	23	3	30	0.5	81.4479	81.4479	82.0655	0.992474
1	MIA PaCa2	D14_3	0.01	1_D14_3_5	G2	24	4	40	0.666667	81.7176	81.7176	80.9707	1.00922
1	MIA PaCa2	D14_3	0.01	1_D14_3_5	G2	25	5	50	0.833333	83.2492	83.2492	80.691	1.0317
1	MIA PaCa2	D14_3	0.01	1_D14_3_5	G2	26	6	60	1	82.2939	82.2939	79.6097	1.03372
1	MIA PaCa2	D14_3	0.01	1_D14_3_5	G2	27	7	70	1.16667	82.0254	82.0254	79.1117	1.03683
1	MIA PaCa2	D14_3	0.01	1_D14_3_5	G2	28	8	80	1.33333	84.5262	84.5262	78.0016	1.08365
1	MIA PaCa2	D14_3	0.01	1_D14_3_5	G2	29	9	90	1.5	83.4372	83.4372	77.8528	1.07173
1	MIA PaCa2	D14_3	0.01	1_D14_3_5	G2	30	10	100	1.66667	83.9431	83.9431	77.6698	1.08077
1	MIA PaCa2	D14_3	0.01	1_D14_3_5	G2	31	11	110	1.83333	81.8228	81.8228	77.1169	1.06102
1	MIA PaCa2	D14_3	0.01	1_D14_3_5	G2	32	12	120	2	81.4278	81.4278	76.7701	1.06067
1	MIA PaCa2	D14_3	0.01	1_D14_3_5	G2	33	13	130	2.16667	80.2577	80.2577	75.9843	1.05624
1	MIA PaCa2	D14_3	0.01	1_D14_3_5	G2	34	14	140	2.33333	80.69	80.69	75.0842	1.07466
1	MIA PaCa2	D14_3	0.01	1_D14_3_5	G2	35	15	150	2.5	79.0712	79.0712	75.707	1.04444
1	MIA PaCa2	D14_3	0.01	1_D14_3_5	G2	36	16	160	2.66667	77.6718	77.6718	74.2775	1.0457
1	MIA PaCa2	D14_3	0.01	1_D14_3_5	G2	38	18	180	3	81.7712	81.7712	73.1743	1.11749
1	MIA PaCa2	D14_3	0.01	1_D14_3_5	G2	39	19	190	3.16667	82.1064	82.1064	72.5019	1.13247
1	MIA PaCa2	D14_3	0.01	1_D14_3_5	G2	40	20	200	3.33333	78.3721	78.3721	71.7669	1.09204
1	MIA PaCa2	D14_3	0.01	1_D14_3_5	G2	41	21	210	3.5	77.1421	77.1421	72.0161	1.07118
1	MIA PaCa2	D14_3	0.01	1_D14_3_5	G2	42	22	220	3.66667	79.389	79.389	71.8185	1.10541
1	MIA PaCa2	D14_3	0.01	1_D14_3_5	G2	43	23	230	3.83333	78.6427	78.6427	71.1314	1.1056
1	MIA PaCa2	D14_3	0.01	1_D14_3_5	G2	44	24	240	4	81.1895	81.1895	70.5922	1.15012
1	MIA PaCa2	D14_3	0.01	1_D14_3_5	G2	45	25	250	4.16667	83.0333	83.0333	70.3088	1.18098
1	MIA PaCa2	D14_3	0.01	1_D14_3_5	G2	46	26	260	4.33333	82.9974	82.9974	70.5953	1.17568
1	MIA PaCa2	D14_3	0.01	1_D14_3_5	G2	48	28	280	4.66667	80.4178	80.4178	69.4746	1.15751
1	MIA PaCa2	D14_3	0.01	1_D14_3_5	G2	49	29	290	4.83333	77.7651	77.7651	68.6304	1.1331
1	MIA PaCa2	D14_3	0.01	1_D14_3_5	G2	50	30	300	5	77.3735	77.3735	68.8548	1.12372
1	MIA PaCa2	D14_3	0.01	1_D14_3_5	G2	51	31	310	5.16667	78.0482	78.0482	68.1679	1.14494
1	MIA PaCa2	D14_3	0.01	1_D14_3_5	G2	52	32	320	5.33333	76.1692	76.1692	67.3507	1.13093
1	MIA PaCa2	D14_3	0.01	1_D14_3_5	G2	53	33	330	5.5	76.5433	76.5433	67.9219	1.12693
1	MIA PaCa2	D14_3	0.01	1_D14_3_5	G2	54	34	340	5.66667	76.6165	76.6165	68.0349	1.12613
1	MIA PaCa2	D14_3	0.01	1_D14_3_5	G2	55	35	350	5.83333	73.938	73.938	68.887	1.07332
1	MIA PaCa2	D14_3	0.01	1_D14_3_5	G2	56	36	360	6	73.5486	73.5486	68.1633	1.07901
1	MIA PaCa2	D14_3	0.01	1_D14_3_5	G2	57	37	370	6.16667	70.4221	70.4221	67.2471	1.04721
1	MIA PaCa2	D14_3	0.01	1_D14_3_5	G2	58	38	380	6.33333	71.0912	71.0912	67.1163	1.05922
1	MIA PaCa2	D14_3	0.01	1_D14_3_5	G2	59	39	390	6.5	73.0887	73.0887	66.9979	1.09091
1	MIA PaCa2	D14_3	0.01	1_D14_3_5	G2	60	40	400	6.66667	72.8983	72.8983	66.8466	1.09053
1	MIA PaCa2	D14_3	0.01	1_D14_3_5	G2	61	41	410	6.83333	69.8212	69.8212	66.872	1.0441
1	MIA PaCa2	D14_3	0.01	1_D14_3_5	G2	62	42	420	7	76.8425	76.8425	67.4151	1.13984
1	MIA PaCa2	D14_3	0.01	1_D14_3_5	G2	63	43	430	7.16667	76.8951	76.8951	66.593	1.1547
1	MIA PaCa2	D14_3	0.01	1_D14_3_5	G2	64	44	440	7.33333	75.1294	75.1294	64.9413	1.15688
1	MIA PaCa2	D14_3	0.01	1_D14_3_5	G2	65	45	450	7.5	78.6878	78.6878	65.8821	1.19437
1	MIA PaCa2	D14_3	0.01	1_D14_3_5	G2	66	46	460	7.66667	81.4599	81.4599	65.7717	1.23853
1	MIA PaCa2	D14_3	0.01	1_D14_3_5	G2	67	47	470	7.83333	81.1008	81.1008	65.9693	1.22937
1	MIA PaCa2	D14_3	0.01	1_D14_3_5	G2	68	48	480	8	78.6741	78.6741	65.2461	1.2058
1	MIA PaCa2	D14_3	0.01	1_D14_3_5	G2	69	49	490	8.16667	78.3882	78.3882	64.9541	1.20682
1	MIA PaCa2	D14_3	0.01	1_D14_3_5	G2	70	50	500	8.33333	83.7874	83.7874	64.7238	1.29454
1	MIA PaCa2	D14_3	0.01	1_D14_3_5	G2	71	51	510	8.5	83.1673	83.1673	64.8745	1.28197
1	MIA PaCa2	D14_3	0.01	1_D14_3_5	G2	72	52	520	8.66667	83.2996	83.2996	65.0075	1.28138
1	MIA PaCa2	D14_3	0.01	1_D14_3_5	G2	73	53	530	8.83333	82.145	82.145	64.3036	1.27746
1	MIA PaCa2	D14_3	0.01	1_D14_3_5	G2	74	54	540	9	83.8932	83.8932	64.0165	1.31049
1	MIA PaCa2	D14_3	0.01	1_D14_3_5	G2	75	55	550	9.16667	83.1261	83.1261	64.712	1.28456
1	MIA PaCa2	D14_3	0.01	1_D14_3_5	G2	79	59	590	9.83333	75.2356	75.2356	63.4249	1.18622
1	MIA PaCa2	D14_3	0.01	1_D14_3_5	G2	80	60	600	10	79.5657	79.5657	63.1512	1.25992
1	MIA PaCa2	D14_3	0.01	1_D14_3_5	G2	81	61	610	10.1667	80.9865	80.9865	63.2666	1.28008
1	MIA PaCa2	D14_3	0.01	1_D14_3_5	G2	82	62	620	10.3333	78.3315	78.3315	62.8471	1.24638
1	MIA PaCa2	D14_3	0.01	1_D14_3_5	G2	83	63	630	10.5	76.5467	76.5467	62.9485	1.21602
1	MIA PaCa2	D14_3	0.01	1_D14_3_5	G2	84	64	640	10.6667	76.0142	76.0142	63.5908	1.19537
1	MIA PaCa2	D14_3	0.01	1_D14_3_5	G2	85	65	650	10.8333	75.7922	75.7922	63.0209	1.20265
1	MIA PaCa2	D14_3	0.01	1_D14_3_5	G2	86	66	660	11	75.2582	75.2582	63.2933	1.18904
1	MIA PaCa2	D14_3	0.01	1_D14_3_5	G2	87	67	670	11.1667	73.4655	73.4655	61.9681	1.18554
1	MIA PaCa2	D14_3	0.01	1_D14_3_5	G2	88	68	680	11.3333	74.0051	74.0051	61.0898	1.21142
1	MIA PaCa2	D14_3	0.01	1_D14_3_5	G2	89	69	690	11.5	73.7921	73.7921	61.5941	1.19804
1	MIA PaCa2	D14_3	0.01	1_D14_3_5	G2	90	70	700	11.6667	76.3921	76.3921	62.8735	1.21501
1	MIA PaCa2	D14_3	0.01	1_D14_3_5	G2	91	71	710	11.8333	73.4595	73.4595	61.5615	1.19327
1	MIA PaCa2	D14_3	0.01	1_D14_3_5	G2	92	72	720	12	72.0152	72.0152	60.7859	1.18473
1	MIA PaCa2	D14_3	0.01	1_D14_3_5	G2	93	73	730	12.1667	74.0667	74.0667	60.8609	1.21698
1	MIA PaCa2	D14_3	0.01	1_D14_3_5	G2	94	74	740	12.3333	71.5351	71.5351	60.9904	1.17289
1	MIA PaCa2	D14_3	0.01	1_D14_3_5	G2	95	75	750	12.5	73.4801	73.4801	61.556	1.19371
1	MIA PaCa2	D14_3	0.01	1_D14_3_5	G2	96	76	760	12.6667	73.0914	73.0914	61.3403	1.19157
1	MIA PaCa2	D14_3	0.01	1_D14_3_5	G2	97	77	770	12.8333	67.6286	67.6286	61.6391	1.09717
1	MIA PaCa2	D14_3	0.01	1_D14_3_5	G2	98	78	780	13	65.5708	65.5708	60.4758	1.08425
1	MIA PaCa2	D14_3	0.01	1_D14_3_5	G2	99	79	790	13.1667	65.4675	65.4675	60.3963	1.08397
1	MIA PaCa2	D14_3	0.01	1_D14_3_5	G2	100	80	800	13.3333	65.3361	65.3361	60.7884	1.07481
1	MIA PaCa2	D14_3	0.01	1_D14_3_5	G2	101	81	810	13.5	63.4463	63.4463	60.3059	1.05207
1	MIA PaCa2	D14_3	0.01	1_D14_3_5	G2	102	82	820	13.6667	66.6207	66.6207	60.7794	1.09611
1	MIA PaCa2	D14_3	0.01	1_D14_3_5	G2	103	83	830	13.8333	64.6799	64.6799	60.5056	1.06899
1	MIA PaCa2	D14_3	0.01	1_D14_3_5	G2	104	84	840	14	67.5344	67.5344	59.623	1.13269
1	MIA PaCa2	D14_3	0.01	1_D14_3_5	G2	105	85	850	14.1667	68.509	68.509	59.3892	1.15356
1	MIA PaCa2	D14_3	0.01	1_D14_3_5	G2	106	86	860	14.3333	62.9042	62.9042	59.9458	1.04935
1	MIA PaCa2	D14_3	0.01	1_D14_3_5	G2	107	87	870	14.5	64.979	64.979	59.293	1.0959
1	MIA PaCa2	D14_3	0.01	1_D14_3_5	G2	108	88	880	14.6667	64.3028	64.3028	59.7326	1.07651
1	MIA PaCa2	D14_3	0.01	1_D14_3_5	G2	109	89	890	14.8333	65.4811	65.4811	59.2145	1.10583
1	MIA PaCa2	D14_3	0.01	1_D14_3_5	G2	110	90	900	15	62.3333	62.3333	59.5265	1.04715
1	MIA PaCa2	D14_3	0.01	1_D14_3_5	G2	111	91	910	15.1667	60.2897	60.2897	22.61	2.6665
1	MIA PaCa2	D14_3	0.01	1_D14_3_5	G2	112	92	920	15.3333	23.732	23.732	22.6798	1.04639
1	MIA PaCa2	D14_3	0.01	1_D14_3_5	G2	113	93	930	15.5	25.6504	25.6504	22.7253	1.12872
1	MIA PaCa2	D14_3	0.01	1_D14_3_5	G2	114	94	940	15.6667	24.4912	24.4912	22.5639	1.08542
1	MIA PaCa2	D14_3	0.01	1_D14_3_5	G2	115	95	950	15.8333	25.3771	25.3771	22.4399	1.13089
1	MIA PaCa2	D14_3	0.01	1_D14_3_5	G2	116	96	960	16	24.8213	24.8213	22.771	1.09004
1	MIA PaCa2	D14_3	0.01	1_D14_3_5	G2	117	97	970	16.1667	24.7489	24.7489	22.6665	1.09187
1	MIA PaCa2	D14_3	0.01	1_D14_3_5	G2	118	98	980	16.3333	24.7657	24.7657	23.0617	1.07389
1	MIA PaCa2	D14_3	0.01	1_D14_3_5	G2	119	99	990	16.5	24.2282	24.2282	22.7043	1.06712
1	MIA PaCa2	D14_3	0.01	1_D14_3_5	G2	120	100	1000	16.6667	24.0942	24.0942	22.9546	1.04964
1	MIA PaCa2	D14_3	0.01	1_D14_3_70	S	11	-9	-90	-1.5	121.625	121.625	87.39	1.39174
1	MIA PaCa2	D14_3	0.01	1_D14_3_70	S	12	-8	-80	-1.33333	108.595	108.595	86.2825	1.2586
1	MIA PaCa2	D14_3	0.01	1_D14_3_70	S	13	-7	-70	-1.16667	109.868	109.868	84.872	1.29452
1	MIA PaCa2	D14_3	0.01	1_D14_3_70	S	14	-6	-60	-1	106.897	106.897	85.6506	1.24806
1	MIA PaCa2	D14_3	0.01	1_D14_3_70	S	15	-5	-50	-0.833333	102.995	102.995	84.1405	1.22409
1	MIA PaCa2	D14_3	0.01	1_D14_3_70	S	16	-4	-40	-0.666667	107.257	107.257	82.5286	1.29963
1	MIA PaCa2	D14_3	0.01	1_D14_3_70	S	17	-3	-30	-0.5	105.961	105.961	83.098	1.27513
1	MIA PaCa2	D14_3	0.01	1_D14_3_70	S	18	-2	-20	-0.333333	105.113	105.113	82.7797	1.26979
1	MIA PaCa2	D14_3	0.01	1_D14_3_70	S	19	-1	-10	-0.166667	99.0286	99.0286	82.0129	1.20748
1	MIA PaCa2	D14_3	0.01	1_D14_3_70	S	20	0	0	0	101.352	101.352	81.1847	1.24842
1	MIA PaCa2	D14_3	0.01	1_D14_3_70	S	21	1	10	0.166667	101.547	101.547	84.5183	1.20148
1	MIA PaCa2	D14_3	0.01	1_D14_3_70	S	22	2	20	0.333333	106.273	106.273	82.9015	1.28192
1	MIA PaCa2	D14_3	0.01	1_D14_3_70	S	23	3	30	0.5	111.99	111.99	82.0655	1.36465
1	MIA PaCa2	D14_3	0.01	1_D14_3_70	S	24	4	40	0.666667	115.144	115.144	80.9707	1.42204
1	MIA PaCa2	D14_3	0.01	1_D14_3_70	S	25	5	50	0.833333	119.494	119.494	80.691	1.48088
1	MIA PaCa2	D14_3	0.01	1_D14_3_70	S	26	6	60	1	118.023	118.023	79.6097	1.48252
1	MIA PaCa2	D14_3	0.01	1_D14_3_70	S	27	7	70	1.16667	118.593	118.593	79.1117	1.49905
1	MIA PaCa2	D14_3	0.01	1_D14_3_70	S	28	8	80	1.33333	117.698	117.698	78.0016	1.50892
1	MIA PaCa2	D14_3	0.01	1_D14_3_70	S	29	9	90	1.5	117.354	117.354	77.8528	1.50738
1	MIA PaCa2	D14_3	0.01	1_D14_3_70	S	30	10	100	1.66667	114.534	114.534	77.6698	1.47463
1	MIA PaCa2	D14_3	0.01	1_D14_3_70	S	31	11	110	1.83333	114.584	114.584	77.1169	1.48585
1	MIA PaCa2	D14_3	0.01	1_D14_3_70	S	32	12	120	2	116.046	116.046	76.7701	1.5116
1	MIA PaCa2	D14_3	0.01	1_D14_3_70	S	33	13	130	2.16667	116.245	116.245	75.9843	1.52986
1	MIA PaCa2	D14_3	0.01	1_D14_3_70	S	34	14	140	2.33333	110.997	110.997	75.0842	1.4783
1	MIA PaCa2	D14_3	0.01	1_D14_3_70	S	35	15	150	2.5	110.31	110.31	75.707	1.45706
1	MIA PaCa2	D14_3	0.01	1_D14_3_70	S	36	16	160	2.66667	108.073	108.073	74.2775	1.45498
1	MIA PaCa2	D14_3	0.01	1_D14_3_70	S	37	17	170	2.83333	104.284	104.284	73.2738	1.42321
1	MIA PaCa2	D14_3	0.01	1_D14_3_70	S	38	18	180	3	104.396	104.396	73.1743	1.42668
1	MIA PaCa2	D14_3	0.01	1_D14_3_70	S	39	19	190	3.16667	108.473	108.473	72.5019	1.49614
1	MIA PaCa2	D14_3	0.01	1_D14_3_70	S	40	20	200	3.33333	106.605	106.605	71.7669	1.48544
1	MIA PaCa2	D14_3	0.01	1_D14_3_70	S	41	21	210	3.5	107.229	107.229	72.0161	1.48896
1	MIA PaCa2	D14_3	0.01	1_D14_3_70	S	42	22	220	3.66667	108.01	108.01	71.8185	1.50392
1	MIA PaCa2	D14_3	0.01	1_D14_3_70	S	43	23	230	3.83333	103.574	103.574	71.1314	1.4561
1	MIA PaCa2	D14_3	0.01	1_D14_3_70	S	44	24	240	4	102.799	102.799	70.5922	1.45623
1	MIA PaCa2	D14_3	0.01	1_D14_3_70	S	45	25	250	4.16667	99.1625	99.1625	70.3088	1.41039
1	MIA PaCa2	D14_3	0.01	1_D14_3_70	S	46	26	260	4.33333	97.6024	97.6024	70.5953	1.38256
1	MIA PaCa2	D14_3	0.01	1_D14_3_70	S	47	27	270	4.5	99.123	99.123	70.0862	1.4143
1	MIA PaCa2	D14_3	0.01	1_D14_3_70	S	48	28	280	4.66667	95.6057	95.6057	69.4746	1.37612
1	MIA PaCa2	D14_3	0.01	1_D14_3_70	S	49	29	290	4.83333	91.3754	91.3754	68.6304	1.33141
1	MIA PaCa2	D14_3	0.01	1_D14_3_70	S	50	30	300	5	92.1141	92.1141	68.8548	1.3378
1	MIA PaCa2	D14_3	0.01	1_D14_3_70	S	51	31	310	5.16667	92.9144	92.9144	68.1679	1.36302
1	MIA PaCa2	D14_3	0.01	1_D14_3_70	S	52	32	320	5.33333	97.936	97.936	67.3507	1.45412
1	MIA PaCa2	D14_3	0.01	1_D14_3_70	S	53	33	330	5.5	97.5458	97.5458	67.9219	1.43615
1	MIA PaCa2	D14_3	0.01	1_D14_3_70	S	54	34	340	5.66667	97.5132	97.5132	68.0349	1.43328
1	MIA PaCa2	D14_3	0.01	1_D14_3_70	S	55	35	350	5.83333	94.7562	94.7562	68.887	1.37553
1	MIA PaCa2	D14_3	0.01	1_D14_3_70	S	56	36	360	6	91.7227	91.7227	68.1633	1.34563
1	MIA PaCa2	D14_3	0.01	1_D14_3_70	S	57	37	370	6.16667	91.0388	91.0388	67.2471	1.35379
1	MIA PaCa2	D14_3	0.01	1_D14_3_70	S	58	38	380	6.33333	88.2582	88.2582	67.1163	1.315
1	MIA PaCa2	D14_3	0.01	1_D14_3_70	S	59	39	390	6.5	90.8683	90.8683	66.9979	1.35629
1	MIA PaCa2	D14_3	0.01	1_D14_3_70	S	60	40	400	6.66667	88.727	88.727	66.8466	1.32732
1	MIA PaCa2	D14_3	0.01	1_D14_3_70	S	61	41	410	6.83333	88.2338	88.2338	66.872	1.31944
1	MIA PaCa2	D14_3	0.01	1_D14_3_70	S	62	42	420	7	89.3574	89.3574	67.4151	1.32548
1	MIA PaCa2	D14_3	0.01	1_D14_3_70	S	63	43	430	7.16667	90.4333	90.4333	66.593	1.358
1	MIA PaCa2	D14_3	0.01	1_D14_3_70	S	64	44	440	7.33333	85.2905	85.2905	64.9413	1.31335
1	MIA PaCa2	D14_3	0.01	1_D14_3_70	S	65	45	450	7.5	86.0702	86.0702	65.8821	1.30643
1	MIA PaCa2	D14_3	0.01	1_D14_3_70	S	66	46	460	7.66667	84.3709	84.3709	65.7717	1.28278
1	MIA PaCa2	D14_3	0.01	1_D14_3_70	S	67	47	470	7.83333	83.617	83.617	65.9693	1.26751
1	MIA PaCa2	D14_3	0.01	1_D14_3_70	S	68	48	480	8	83.6759	83.6759	65.2461	1.28247
1	MIA PaCa2	D14_3	0.01	1_D14_3_70	S	69	49	490	8.16667	85.3655	85.3655	64.9541	1.31424
1	MIA PaCa2	D14_3	0.01	1_D14_3_70	S	70	50	500	8.33333	87.8973	87.8973	64.7238	1.35804
1	MIA PaCa2	D14_3	0.01	1_D14_3_70	S	71	51	510	8.5	88.2819	88.2819	64.8745	1.36081
1	MIA PaCa2	D14_3	0.01	1_D14_3_70	S	72	52	520	8.66667	92.313	92.313	65.0075	1.42004
1	MIA PaCa2	D14_3	0.01	1_D14_3_70	S	73	53	530	8.83333	87.8521	87.8521	64.3036	1.36621
1	MIA PaCa2	D14_3	0.01	1_D14_3_70	S	74	54	540	9	84.3295	84.3295	64.0165	1.31731
1	MIA PaCa2	D14_3	0.01	1_D14_3_70	S	75	55	550	9.16667	86.0962	86.0962	64.712	1.33045
1	MIA PaCa2	D14_3	0.01	1_D14_3_70	S	76	56	560	9.33333	83.9072	83.9072	64.0422	1.31019
1	MIA PaCa2	D14_3	0.01	1_D14_3_70	S	77	57	570	9.5	85.7075	85.7075	63.8764	1.34177
1	MIA PaCa2	D14_3	0.01	1_D14_3_70	S	78	58	580	9.66667	82.6875	82.6875	63.7423	1.29722
1	MIA PaCa2	D14_3	0.01	1_D14_3_70	S	79	59	590	9.83333	82.1069	82.1069	63.4249	1.29455
1	MIA PaCa2	D14_3	0.01	1_D14_3_70	S	80	60	600	10	80.7367	80.7367	63.1512	1.27847
1	MIA PaCa2	D14_3	0.01	1_D14_3_70	S	81	61	610	10.1667	80.0436	80.0436	63.2666	1.26518
1	MIA PaCa2	D14_3	0.01	1_D14_3_70	S	82	62	620	10.3333	85.3372	85.3372	62.8471	1.35785
1	MIA PaCa2	D14_3	0.01	1_D14_3_70	S	83	63	630	10.5	89.5952	89.5952	62.9485	1.42331
1	MIA PaCa2	D14_3	0.01	1_D14_3_70	S	84	64	640	10.6667	84.7608	84.7608	63.5908	1.33291
1	MIA PaCa2	D14_3	0.01	1_D14_3_72	S	9	-11	-110	-1.83333	106.151	106.151	88.8498	1.19473
1	MIA PaCa2	D14_3	0.01	1_D14_3_72	S	10	-10	-100	-1.66667	103.095	103.095	88.0257	1.17119
1	MIA PaCa2	D14_3	0.01	1_D14_3_72	S	11	-9	-90	-1.5	101.462	101.462	87.39	1.16103
1	MIA PaCa2	D14_3	0.01	1_D14_3_72	S	12	-8	-80	-1.33333	97.2662	97.2662	86.2825	1.1273
1	MIA PaCa2	D14_3	0.01	1_D14_3_72	S	13	-7	-70	-1.16667	93.6559	93.6559	84.872	1.1035
1	MIA PaCa2	D14_3	0.01	1_D14_3_72	S	14	-6	-60	-1	95.4523	95.4523	85.6506	1.11444
1	MIA PaCa2	D14_3	0.01	1_D14_3_72	S	15	-5	-50	-0.833333	96.7742	96.7742	84.1405	1.15015
1	MIA PaCa2	D14_3	0.01	1_D14_3_72	S	16	-4	-40	-0.666667	94.698	94.698	82.5286	1.14746
1	MIA PaCa2	D14_3	0.01	1_D14_3_72	S	17	-3	-30	-0.5	93.7681	93.7681	83.098	1.1284
1	MIA PaCa2	D14_3	0.01	1_D14_3_72	S	18	-2	-20	-0.333333	93.9778	93.9778	82.7797	1.13528
1	MIA PaCa2	D14_3	0.01	1_D14_3_72	S	19	-1	-10	-0.166667	94.4411	94.4411	82.0129	1.15154
1	MIA PaCa2	D14_3	0.01	1_D14_3_72	S	20	0	0	0	94.5508	94.5508	81.1847	1.16464
1	MIA PaCa2	D14_3	0.01	1_D14_3_72	S	21	1	10	0.166667	95.9775	95.9775	84.5183	1.13558
1	MIA PaCa2	D14_3	0.01	1_D14_3_72	S	22	2	20	0.333333	102.472	102.472	82.9015	1.23607
1	MIA PaCa2	D14_3	0.01	1_D14_3_72	S	23	3	30	0.5	103.147	103.147	82.0655	1.25689
1	MIA PaCa2	D14_3	0.01	1_D14_3_72	S	24	4	40	0.666667	107.614	107.614	80.9707	1.32905
1	MIA PaCa2	D14_3	0.01	1_D14_3_72	S	25	5	50	0.833333	110.895	110.895	80.691	1.37432
1	MIA PaCa2	D14_3	0.01	1_D14_3_72	S	26	6	60	1	107.726	107.726	79.6097	1.35317
1	MIA PaCa2	D14_3	0.01	1_D14_3_72	S	27	7	70	1.16667	102.198	102.198	79.1117	1.29183
1	MIA PaCa2	D14_3	0.01	1_D14_3_72	S	28	8	80	1.33333	102.723	102.723	78.0016	1.31693
1	MIA PaCa2	D14_3	0.01	1_D14_3_72	S	29	9	90	1.5	104.295	104.295	77.8528	1.33965
1	MIA PaCa2	D14_3	0.01	1_D14_3_72	S	30	10	100	1.66667	106.336	106.336	77.6698	1.36907
1	MIA PaCa2	D14_3	0.01	1_D14_3_72	S	31	11	110	1.83333	101.694	101.694	77.1169	1.3187
1	MIA PaCa2	D14_3	0.01	1_D14_3_72	S	32	12	120	2	103.075	103.075	76.7701	1.34264
1	MIA PaCa2	D14_3	0.01	1_D14_3_72	S	33	13	130	2.16667	103.294	103.294	75.9843	1.35942
1	MIA PaCa2	D14_3	0.01	1_D14_3_72	S	34	14	140	2.33333	106.33	106.33	75.0842	1.41614
1	MIA PaCa2	D14_3	0.01	1_D14_3_72	S	35	15	150	2.5	103.408	103.408	75.707	1.3659
1	MIA PaCa2	D14_3	0.01	1_D14_3_72	S	36	16	160	2.66667	103.922	103.922	74.2775	1.39911
1	MIA PaCa2	D14_3	0.01	1_D14_3_72	S	37	17	170	2.83333	102.693	102.693	73.2738	1.40149
1	MIA PaCa2	D14_3	0.01	1_D14_3_72	S	38	18	180	3	102.207	102.207	73.1743	1.39676
1	MIA PaCa2	D14_3	0.01	1_D14_3_72	S	39	19	190	3.16667	100.599	100.599	72.5019	1.38753
1	MIA PaCa2	D14_3	0.01	1_D14_3_72	S	40	20	200	3.33333	92.6783	92.6783	71.7669	1.29138
1	MIA PaCa2	D14_3	0.01	1_D14_3_72	S	41	21	210	3.5	94.1632	94.1632	72.0161	1.30753
1	MIA PaCa2	D14_3	0.01	1_D14_3_72	S	42	22	220	3.66667	93.6726	93.6726	71.8185	1.3043
1	MIA PaCa2	D14_3	0.01	1_D14_3_72	S	43	23	230	3.83333	96.1837	96.1837	71.1314	1.3522
1	MIA PaCa2	D14_3	0.01	1_D14_3_72	S	44	24	240	4	97.5994	97.5994	70.5922	1.38258
1	MIA PaCa2	D14_3	0.01	1_D14_3_72	S	45	25	250	4.16667	94.8715	94.8715	70.3088	1.34935
1	MIA PaCa2	D14_3	0.01	1_D14_3_72	S	46	26	260	4.33333	94.169	94.169	70.5953	1.33393
1	MIA PaCa2	D14_3	0.01	1_D14_3_72	S	47	27	270	4.5	96.7396	96.7396	70.0862	1.3803
1	MIA PaCa2	D14_3	0.01	1_D14_3_72	S	48	28	280	4.66667	96.9176	96.9176	69.4746	1.39501
1	MIA PaCa2	D14_3	0.01	1_D14_3_72	S	49	29	290	4.83333	93.8054	93.8054	68.6304	1.36682
1	MIA PaCa2	D14_3	0.01	1_D14_3_72	S	50	30	300	5	93.1114	93.1114	68.8548	1.35229
1	MIA PaCa2	D14_3	0.01	1_D14_3_72	S	51	31	310	5.16667	92.9158	92.9158	68.1679	1.36304
1	MIA PaCa2	D14_3	0.01	1_D14_3_72	S	52	32	320	5.33333	88.4698	88.4698	67.3507	1.31357
1	MIA PaCa2	D14_3	0.01	1_D14_3_72	S	53	33	330	5.5	89.9972	89.9972	67.9219	1.32501
1	MIA PaCa2	D14_3	0.01	1_D14_3_72	S	54	34	340	5.66667	86.7778	86.7778	68.0349	1.27549
1	MIA PaCa2	D14_3	0.01	1_D14_3_72	S	55	35	350	5.83333	86.7265	86.7265	68.887	1.25897
1	MIA PaCa2	D14_3	0.01	1_D14_3_72	S	56	36	360	6	86.241	86.241	68.1633	1.26521
1	MIA PaCa2	D14_3	0.01	1_D14_3_72	S	57	37	370	6.16667	85.6206	85.6206	67.2471	1.27322
1	MIA PaCa2	D14_3	0.01	1_D14_3_72	S	58	38	380	6.33333	86.419	86.419	67.1163	1.2876
1	MIA PaCa2	D14_3	0.01	1_D14_3_72	S	59	39	390	6.5	86.5481	86.5481	66.9979	1.2918
1	MIA PaCa2	D14_3	0.01	1_D14_3_72	S	60	40	400	6.66667	91.1717	91.1717	66.8466	1.36389
1	MIA PaCa2	D14_3	0.01	1_D14_3_72	S	61	41	410	6.83333	90.3269	90.3269	66.872	1.35074
1	MIA PaCa2	D14_3	0.01	1_D14_3_72	S	62	42	420	7	88.3389	88.3389	67.4151	1.31037
1	MIA PaCa2	D14_3	0.01	1_D14_3_72	S	63	43	430	7.16667	85.1602	85.1602	66.593	1.27882
1	MIA PaCa2	D14_3	0.01	1_D14_3_72	S	64	44	440	7.33333	87.1437	87.1437	64.9413	1.34188
1	MIA PaCa2	D14_3	0.01	1_D14_3_72	S	65	45	450	7.5	85.861	85.861	65.8821	1.30325
1	MIA PaCa2	D14_3	0.01	1_D14_3_72	S	66	46	460	7.66667	89.158	89.158	65.7717	1.35557
1	MIA PaCa2	D14_3	0.01	1_D14_3_72	S	67	47	470	7.83333	86.6379	86.6379	65.9693	1.31331
1	MIA PaCa2	D14_3	0.01	1_D14_3_72	S	68	48	480	8	87.5789	87.5789	65.2461	1.34228
1	MIA PaCa2	D14_3	0.01	1_D14_3_72	S	69	49	490	8.16667	87.9968	87.9968	64.9541	1.35475
1	MIA PaCa2	D14_3	0.01	1_D14_3_72	S	70	50	500	8.33333	90.8526	90.8526	64.7238	1.4037
1	MIA PaCa2	D14_3	0.01	1_D14_3_72	S	71	51	510	8.5	94.2163	94.2163	64.8745	1.45229
1	MIA PaCa2	D14_3	0.01	1_D14_3_72	S	72	52	520	8.66667	90.7688	90.7688	65.0075	1.39628
1	MIA PaCa2	D14_3	0.01	1_D14_3_72	S	73	53	530	8.83333	89.9406	89.9406	64.3036	1.39869
1	MIA PaCa2	D14_3	0.01	1_D14_3_72	S	74	54	540	9	89.3117	89.3117	64.0165	1.39514
1	MIA PaCa2	D14_3	0.01	1_D14_3_72	S	75	55	550	9.16667	90.1411	90.1411	64.712	1.39296
1	MIA PaCa2	D14_3	0.01	1_D14_3_72	S	76	56	560	9.33333	90.1306	90.1306	64.0422	1.40736
1	MIA PaCa2	D14_3	0.01	1_D14_3_72	S	77	57	570	9.5	85.9317	85.9317	63.8764	1.34528
1	MIA PaCa2	D14_3	0.01	1_D14_3_72	S	78	58	580	9.66667	91.6826	91.6826	63.7423	1.43833
1	MIA PaCa2	D14_3	0.01	1_D14_3_72	S	79	59	590	9.83333	92.5225	92.5225	63.4249	1.45877
1	MIA PaCa2	D14_3	0.01	1_D14_3_72	S	80	60	600	10	92.142	92.142	63.1512	1.45907
1	MIA PaCa2	D14_3	0.01	1_D14_3_72	S	81	61	610	10.1667	87.9582	87.9582	63.2666	1.39028
1	MIA PaCa2	D14_3	0.01	1_D14_3_72	S	82	62	620	10.3333	89.1411	89.1411	62.8471	1.41838
1	MIA PaCa2	D14_3	0.01	1_D14_3_72	S	83	63	630	10.5	91.9483	91.9483	62.9485	1.46069
1	MIA PaCa2	D14_3	0.01	1_D14_3_72	S	84	64	640	10.6667	86.7552	86.7552	63.5908	1.36427
1	MIA PaCa2	D14_3	0.01	1_D14_3_72	S	85	65	650	10.8333	85.6154	85.6154	63.0209	1.35852
1	MIA PaCa2	D14_3	0.01	1_D14_3_72	S	86	66	660	11	92.8442	92.8442	63.2933	1.46689
1	MIA PaCa2	D14_3	0.01	1_D14_3_72	S	87	67	670	11.1667	88.724	88.724	61.9681	1.43177
1	MIA PaCa2	D14_3	0.01	1_D14_3_72	S	88	68	680	11.3333	89.5127	89.5127	61.0898	1.46526
1	MIA PaCa2	D14_3	0.01	1_D14_3_72	S	89	69	690	11.5	100.388	100.388	61.5941	1.62984
1	MIA PaCa2	D14_3	0.01	1_D14_3_72	S	90	70	700	11.6667	99.8435	99.8435	62.8735	1.58801
1	MIA PaCa2	D14_3	0.01	1_D14_3_72	S	91	71	710	11.8333	95.1611	95.1611	61.5615	1.54579
1	MIA PaCa2	D14_3	0.01	1_D14_3_72	S	92	72	720	12	90.6676	90.6676	60.7859	1.49159
1	MIA PaCa2	D14_3	0.01	1_D14_3_72	S	93	73	730	12.1667	88.7119	88.7119	60.8609	1.45762
1	MIA PaCa2	D14_3	0.01	1_D14_3_72	S	94	74	740	12.3333	107.044	107.044	60.9904	1.7551
1	MIA PaCa2	D14_3	0.01	1_D14_3_72	S	95	75	750	12.5	99.6429	99.6429	61.556	1.61874
1	MIA PaCa2	D14_3	0.01	1_D14_3_72	S	96	76	760	12.6667	92.4656	92.4656	61.3403	1.50742
1	MIA PaCa2	D14_3	0.01	1_D14_3_72	S	97	77	770	12.8333	94.3382	94.3382	61.6391	1.53049
1	MIA PaCa2	D14_3	0.01	1_D14_3_72	S	98	78	780	13	100.994	100.994	60.4758	1.66998
1	MIA PaCa2	D14_3	0.01	1_D14_3_72	S	99	79	790	13.1667	97.1903	97.1903	60.3963	1.60921
1	MIA PaCa2	D14_3	0.01	1_D14_3_72	S	100	80	800	13.3333	96.5415	96.5415	60.7884	1.58816
1	MIA PaCa2	D14_3	0.01	1_D14_3_72	S	101	81	810	13.5	95.9749	95.9749	60.3059	1.59147
1	MIA PaCa2	D14_3	0.01	1_D14_3_72	S	102	82	820	13.6667	107.538	107.538	60.7794	1.76932
1	MIA PaCa2	D14_3	0.01	1_D14_3_72	S	103	83	830	13.8333	95.9916	95.9916	60.5056	1.58649
1	MIA PaCa2	D14_3	0.01	1_D14_3_72	S	104	84	840	14	83.351	83.351	59.623	1.39797
1	MIA PaCa2	D14_3	0.01	1_D14_3_72	S	105	85	850	14.1667	81.8076	81.8076	59.3892	1.37748
1	MIA PaCa2	D14_3	0.01	1_D14_3_72	S	106	86	860	14.3333	82.2896	82.2896	59.9458	1.37273
1	MIA PaCa2	D14_3	0.01	1_D14_3_72	S	107	87	870	14.5	81.0815	81.0815	59.293	1.36747
1	MIA PaCa2	D14_3	0.01	1_D14_3_72	S	108	88	880	14.6667	99.8051	99.8051	59.7326	1.67086
1	MIA PaCa2	D14_3	0.01	1_D14_3_72	S	109	89	890	14.8333	98.0517	98.0517	59.2145	1.65587
1	MIA PaCa2	D14_3	0.01	1_D14_3_72	S	110	90	900	15	101.065	101.065	59.5265	1.69782
1	MIA PaCa2	D14_3	0.01	1_D14_3_72	S	111	91	910	15.1667	87.2877	87.2877	22.61	3.86057
1	MIA PaCa2	D14_3	0.01	1_D14_3_72	S	112	92	920	15.3333	31.9668	31.9668	22.6798	1.40948
1	MIA PaCa2	D14_3	0.01	1_D14_3_74	G1	19	-1	-10	-0.166667	80.2308	80.2308	82.0129	0.978271
1	MIA PaCa2	D14_3	0.01	1_D14_3_74	G1	20	0	0	0	86.0655	86.0655	81.1847	1.06012
1	MIA PaCa2	D14_3	0.01	1_D14_3_74	G1	21	1	10	0.166667	83.0536	83.0536	84.5183	0.98267
1	MIA PaCa2	D14_3	0.01	1_D14_3_74	G1	22	2	20	0.333333	81.4538	81.4538	82.9015	0.982537
1	MIA PaCa2	D14_3	0.01	1_D14_3_74	G1	23	3	30	0.5	84.4322	84.4322	82.0655	1.02884
1	MIA PaCa2	D14_3	0.01	1_D14_3_74	G1	25	5	50	0.833333	80.2082	80.2082	80.691	0.994017
1	MIA PaCa2	D14_3	0.01	1_D14_3_74	G1	26	6	60	1	81.9331	81.9331	79.6097	1.02919
1	MIA PaCa2	D14_3	0.01	1_D14_3_74	G1	27	7	70	1.16667	82.9174	82.9174	79.1117	1.04811
1	MIA PaCa2	D14_3	0.01	1_D14_3_74	G1	28	8	80	1.33333	81.9737	81.9737	78.0016	1.05092
1	MIA PaCa2	D14_3	0.01	1_D14_3_74	G1	29	9	90	1.5	78.6555	78.6555	77.8528	1.01031
1	MIA PaCa2	D14_3	0.01	1_D14_3_74	G1	30	10	100	1.66667	81.3348	81.3348	77.6698	1.04719
1	MIA PaCa2	D14_3	0.01	1_D14_3_74	G1	31	11	110	1.83333	81.0229	81.0229	77.1169	1.05065
1	MIA PaCa2	D14_3	0.01	1_D14_3_74	G1	32	12	120	2	81.9865	81.9865	76.7701	1.06795
1	MIA PaCa2	D14_3	0.01	1_D14_3_74	G1	33	13	130	2.16667	80.3317	80.3317	75.9843	1.05721
1	MIA PaCa2	D14_3	0.01	1_D14_3_74	G1	34	14	140	2.33333	79.455	79.455	75.0842	1.05821
1	MIA PaCa2	D14_3	0.01	1_D14_3_74	G1	35	15	150	2.5	81.378	81.378	75.707	1.07491
1	MIA PaCa2	D14_3	0.01	1_D14_3_74	G1	36	16	160	2.66667	80.1918	80.1918	74.2775	1.07962
1	MIA PaCa2	D14_3	0.01	1_D14_3_74	G1	37	17	170	2.83333	80.2965	80.2965	73.2738	1.09584
1	MIA PaCa2	D14_3	0.01	1_D14_3_74	G1	38	18	180	3	82.8182	82.8182	73.1743	1.13179
1	MIA PaCa2	D14_3	0.01	1_D14_3_74	G1	39	19	190	3.16667	83.8028	83.8028	72.5019	1.15587
1	MIA PaCa2	D14_3	0.01	1_D14_3_74	G1	40	20	200	3.33333	80.6232	80.6232	71.7669	1.1234
1	MIA PaCa2	D14_3	0.01	1_D14_3_74	G1	41	21	210	3.5	84.5023	84.5023	72.0161	1.17338
1	MIA PaCa2	D14_3	0.01	1_D14_3_74	G1	42	22	220	3.66667	87.7137	87.7137	71.8185	1.22132
1	MIA PaCa2	D14_3	0.01	1_D14_3_74	G1	43	23	230	3.83333	84.5495	84.5495	71.1314	1.18864
1	MIA PaCa2	D14_3	0.01	1_D14_3_74	G1	44	24	240	4	85.0714	85.0714	70.5922	1.20511
1	MIA PaCa2	D14_3	0.01	1_D14_3_74	G1	45	25	250	4.16667	86.3167	86.3167	70.3088	1.22768
1	MIA PaCa2	D14_3	0.01	1_D14_3_74	G1	46	26	260	4.33333	91.3937	91.3937	70.5953	1.29461
1	MIA PaCa2	D14_3	0.01	1_D14_3_74	G1	47	27	270	4.5	89.9227	89.9227	70.0862	1.28303
1	MIA PaCa2	D14_3	0.01	1_D14_3_74	G1	48	28	280	4.66667	88.6701	88.6701	69.4746	1.27629
1	MIA PaCa2	D14_3	0.01	1_D14_3_74	G1	49	29	290	4.83333	92.6857	92.6857	68.6304	1.3505
1	MIA PaCa2	D14_3	0.01	1_D14_3_74	G1	50	30	300	5	90.6267	90.6267	68.8548	1.3162
1	MIA PaCa2	D14_3	0.01	1_D14_3_74	G1	51	31	310	5.16667	85.7136	85.7136	68.1679	1.25739
1	MIA PaCa2	D14_3	0.01	1_D14_3_74	G1	52	32	320	5.33333	82.7672	82.7672	67.3507	1.2289
1	MIA PaCa2	D14_3	0.01	1_D14_3_74	G1	53	33	330	5.5	90.0645	90.0645	67.9219	1.326
1	MIA PaCa2	D14_3	0.01	1_D14_3_74	G1	54	34	340	5.66667	92.6376	92.6376	68.0349	1.36162
1	MIA PaCa2	D14_3	0.01	1_D14_3_74	G1	55	35	350	5.83333	87.9336	87.9336	68.887	1.27649
1	MIA PaCa2	D14_3	0.01	1_D14_3_74	G1	57	37	370	6.16667	91.9097	91.9097	67.2471	1.36674
1	MIA PaCa2	D14_3	0.01	1_D14_3_74	G1	58	38	380	6.33333	83.668	83.668	67.1163	1.24661
1	MIA PaCa2	D14_3	0.01	1_D14_3_74	G1	59	39	390	6.5	80.101	80.101	66.9979	1.19558
1	MIA PaCa2	D14_3	0.01	1_D14_3_74	G1	60	40	400	6.66667	89.662	89.662	66.8466	1.34131
1	MIA PaCa2	D14_3	0.01	1_D14_3_74	G1	61	41	410	6.83333	84.3164	84.3164	66.872	1.26086
1	MIA PaCa2	D14_3	0.01	1_D14_3_74	G1	62	42	420	7	77.3365	77.3365	67.4151	1.14717
1	MIA PaCa2	D14_3	0.01	1_D14_3_74	G1	63	43	430	7.16667	78.1457	78.1457	66.593	1.17348
1	MIA PaCa2	D14_3	0.01	1_D14_3_74	G1	64	44	440	7.33333	83.2197	83.2197	64.9413	1.28146
1	MIA PaCa2	D14_3	0.01	1_D14_3_74	G1	65	45	450	7.5	75.022	75.022	65.8821	1.13873
1	MIA PaCa2	D14_3	0.01	1_D14_3_74	G1	66	46	460	7.66667	95.2679	95.2679	65.7717	1.44846
1	MIA PaCa2	D14_3	0.01	1_D14_3_74	G1	67	47	470	7.83333	76.5582	76.5582	65.9693	1.16051
1	MIA PaCa2	D14_3	0.01	1_D14_3_74	G1	68	48	480	8	82.2932	82.2932	65.2461	1.26127
1	MIA PaCa2	D14_3	0.01	1_D14_3_74	G1	69	49	490	8.16667	81.2795	81.2795	64.9541	1.25134
1	MIA PaCa2	D14_3	0.01	1_D14_3_74	G1	70	50	500	8.33333	85.2222	85.2222	64.7238	1.31671
1	MIA PaCa2	D14_3	0.01	1_D14_3_74	G1	71	51	510	8.5	87.6547	87.6547	64.8745	1.35114
1	MIA PaCa2	D14_3	0.01	1_D14_3_74	G1	72	52	520	8.66667	81.4317	81.4317	65.0075	1.25265
1	MIA PaCa2	D14_3	0.01	1_D14_3_74	G1	73	53	530	8.83333	79.3808	79.3808	64.3036	1.23447
1	MIA PaCa2	D14_3	0.01	1_D14_3_74	G1	75	55	550	9.16667	77.52	77.52	64.712	1.19792
1	MIA PaCa2	D14_3	0.01	1_D14_3_74	G1	76	56	560	9.33333	81.0892	81.0892	64.0422	1.26618
1	MIA PaCa2	D14_3	0.01	1_D14_3_74	G1	77	57	570	9.5	76.8901	76.8901	63.8764	1.20373
1	MIA PaCa2	D14_3	0.01	1_D14_3_74	G1	78	58	580	9.66667	76.0828	76.0828	63.7423	1.1936
1	MIA PaCa2	D14_3	0.01	1_D14_3_74	G1	79	59	590	9.83333	73.7158	73.7158	63.4249	1.16225
1	MIA PaCa2	D14_3	0.01	1_D14_3_74	G1	80	60	600	10	74.9745	74.9745	63.1512	1.18722
1	MIA PaCa2	D14_3	0.01	1_D14_3_74	G1	81	61	610	10.1667	80.1298	80.1298	63.2666	1.26654
1	MIA PaCa2	D14_3	0.01	1_D14_3_74	G1	82	62	620	10.3333	78.184	78.184	62.8471	1.24403
1	MIA PaCa2	D14_3	0.01	1_D14_3_74	G1	83	63	630	10.5	81.6849	81.6849	62.9485	1.29765
1	MIA PaCa2	D14_3	0.01	1_D14_3_74	G1	84	64	640	10.6667	82.2161	82.2161	63.5908	1.29289
1	MIA PaCa2	D14_3	0.01	1_D14_3_74	G1	85	65	650	10.8333	83.4784	83.4784	63.0209	1.32461
1	MIA PaCa2	D14_3	0.01	1_D14_3_74	G1	86	66	660	11	80.7867	80.7867	63.2933	1.27639
1	MIA PaCa2	D14_3	0.01	1_D14_3_74	G1	87	67	670	11.1667	82.7993	82.7993	61.9681	1.33616
1	MIA PaCa2	D14_3	0.01	1_D14_3_74	G1	88	68	680	11.3333	80.6993	80.6993	61.0898	1.321
1	MIA PaCa2	D14_3	0.01	1_D14_3_74	G1	89	69	690	11.5	79.0137	79.0137	61.5941	1.28281
1	MIA PaCa2	D14_3	0.01	1_D14_3_74	G1	91	71	710	11.8333	76.3584	76.3584	61.5615	1.24036
1	MIA PaCa2	D14_3	0.01	1_D14_3_74	G1	92	72	720	12	76.1442	76.1442	60.7859	1.25266
1	MIA PaCa2	D14_3	0.01	1_D14_3_74	G1	93	73	730	12.1667	75.6527	75.6527	60.8609	1.24304
1	MIA PaCa2	D14_3	0.01	1_D14_3_74	G1	94	74	740	12.3333	72.3438	72.3438	60.9904	1.18615
1	MIA PaCa2	D14_3	0.01	1_D14_3_74	G1	95	75	750	12.5	71.4827	71.4827	61.556	1.16126
1	MIA PaCa2	D14_3	0.01	1_D14_3_74	G1	96	76	760	12.6667	69.8431	69.8431	61.3403	1.13862
1	MIA PaCa2	D14_3	0.01	1_D14_3_74	G1	97	77	770	12.8333	71.3569	71.3569	61.6391	1.15766
1	MIA PaCa2	D14_3	0.01	1_D14_3_74	G1	98	78	780	13	70.9772	70.9772	60.4758	1.17365
1	MIA PaCa2	D14_3	0.01	1_D14_3_74	G1	99	79	790	13.1667	73.3195	73.3195	60.3963	1.21397
1	MIA PaCa2	D14_3	0.01	1_D14_3_74	G1	100	80	800	13.3333	73.6267	73.6267	60.7884	1.2112
1	MIA PaCa2	D14_3	0.01	1_D14_3_74	G1	101	81	810	13.5	72.9879	72.9879	60.3059	1.21029
1	MIA PaCa2	D14_3	0.01	1_D14_3_74	G1	102	82	820	13.6667	72.0579	72.0579	60.7794	1.18556
1	MIA PaCa2	D14_3	0.01	1_D14_3_74	G1	103	83	830	13.8333	72.4583	72.4583	60.5056	1.19755
1	MIA PaCa2	D14_3	0.01	1_D14_3_74	G1	104	84	840	14	68.6951	68.6951	59.623	1.15216
1	MIA PaCa2	D14_3	0.01	1_D14_3_74	G1	105	85	850	14.1667	69.6627	69.6627	59.3892	1.17299
1	MIA PaCa2	D14_3	0.01	1_D14_3_74	G1	106	86	860	14.3333	69.1613	69.1613	59.9458	1.15373
1	MIA PaCa2	D14_3	0.01	1_D14_3_74	G1	107	87	870	14.5	67.8036	67.8036	59.293	1.14353
1	MIA PaCa2	D14_3	0.01	1_D14_3_74	G1	108	88	880	14.6667	68.3788	68.3788	59.7326	1.14475
1	MIA PaCa2	D14_3	0.01	1_D14_3_74	G1	109	89	890	14.8333	70.739	70.739	59.2145	1.19462
1	MIA PaCa2	D14_3	0.01	1_D14_3_74	G1	110	90	900	15	72.2277	72.2277	59.5265	1.21337
1	MIA PaCa2	D14_3	0.01	1_D14_3_74	G1	111	91	910	15.1667	71.0251	71.0251	22.61	3.14131
1	MIA PaCa2	D14_3	0.01	1_D14_3_74	G1	112	92	920	15.3333	26.7575	26.7575	22.6798	1.1798
1	MIA PaCa2	D14_3	0.01	1_D14_3_74	G1	113	93	930	15.5	27.3133	27.3133	22.7253	1.20189
1	MIA PaCa2	D14_3	0.01	1_D14_3_74	G1	114	94	940	15.6667	27.2414	27.2414	22.5639	1.2073
1	MIA PaCa2	D14_3	0.01	1_D14_3_74	G1	115	95	950	15.8333	28.7468	28.7468	22.4399	1.28106
1	MIA PaCa2	D14_3	0.01	1_D14_3_74	G1	116	96	960	16	27.5605	27.5605	22.771	1.21033
1	MIA PaCa2	D14_3	0.01	1_D14_3_74	G1	117	97	970	16.1667	26.3835	26.3835	22.6665	1.16398
1	MIA PaCa2	D14_3	0.01	1_D14_3_74	G1	118	98	980	16.3333	28.4281	28.4281	23.0617	1.2327
1	MIA PaCa2	D14_3	0.01	1_D14_3_74	G1	119	99	990	16.5	27.2471	27.2471	22.7043	1.20009
1	MIA PaCa2	D14_3	0.01	1_D14_3_74	G1	120	100	1000	16.6667	28.1398	28.1398	22.9546	1.22589
1	MIA PaCa2	D14_3	0.01	1_D14_3_74	G1	121	101	1010	16.8333	27.3894	27.3894	23.1818	1.1815
1	MIA PaCa2	D14_3	0.01	1_D14_3_74	G1	122	102	1020	17	26.8784	26.8784	22.9702	1.17014
1	MIA PaCa2	D14_3	0.01	1_D14_3_74	G1	123	103	1030	17.1667	27.3866	27.3866	22.8295	1.19961
1	MIA PaCa2	D14_3	0.01	1_D14_3_74	G1	124	104	1040	17.3333	26.9369	26.9369	22.8913	1.17673
1	MIA PaCa2	D14_3	0.01	1_D14_3_74	G1	125	105	1050	17.5	28.3077	28.3077	22.9525	1.23332
1	MIA PaCa2	D14_3	0.01	1_D14_3_76	G1	16	-4	-40	-0.666667	80.1415	80.1415	82.5286	0.971076
1	MIA PaCa2	D14_3	0.01	1_D14_3_76	G1	17	-3	-30	-0.5	79.1065	79.1065	83.098	0.951966
1	MIA PaCa2	D14_3	0.01	1_D14_3_76	G1	18	-2	-20	-0.333333	77.6422	77.6422	82.7797	0.937938
1	MIA PaCa2	D14_3	0.01	1_D14_3_76	G1	19	-1	-10	-0.166667	74.2554	74.2554	82.0129	0.905411
1	MIA PaCa2	D14_3	0.01	1_D14_3_76	G1	20	0	0	0	72.7083	72.7083	81.1847	0.895591
1	MIA PaCa2	D14_3	0.01	1_D14_3_76	G1	21	1	10	0.166667	77.8229	77.8229	84.5183	0.920782
1	MIA PaCa2	D14_3	0.01	1_D14_3_76	G1	22	2	20	0.333333	81.2405	81.2405	82.9015	0.979964
1	MIA PaCa2	D14_3	0.01	1_D14_3_76	G1	23	3	30	0.5	85.6544	85.6544	82.0655	1.04373
1	MIA PaCa2	D14_3	0.01	1_D14_3_76	G1	24	4	40	0.666667	85.7941	85.7941	80.9707	1.05957
1	MIA PaCa2	D14_3	0.01	1_D14_3_76	G1	25	5	50	0.833333	87.8511	87.8511	80.691	1.08874
1	MIA PaCa2	D14_3	0.01	1_D14_3_76	G1	26	6	60	1	86.4632	86.4632	79.6097	1.08609
1	MIA PaCa2	D14_3	0.01	1_D14_3_76	G1	27	7	70	1.16667	85.2895	85.2895	79.1117	1.07809
1	MIA PaCa2	D14_3	0.01	1_D14_3_76	G1	28	8	80	1.33333	84.7174	84.7174	78.0016	1.0861
1	MIA PaCa2	D14_3	0.01	1_D14_3_76	G1	29	9	90	1.5	82.7417	82.7417	77.8528	1.0628
1	MIA PaCa2	D14_3	0.01	1_D14_3_76	G1	30	10	100	1.66667	83.0207	83.0207	77.6698	1.06889
1	MIA PaCa2	D14_3	0.01	1_D14_3_76	G1	31	11	110	1.83333	81.965	81.965	77.1169	1.06287
1	MIA PaCa2	D14_3	0.01	1_D14_3_76	G1	32	12	120	2	81.6226	81.6226	76.7701	1.06321
1	MIA PaCa2	D14_3	0.01	1_D14_3_76	G1	33	13	130	2.16667	82.4182	82.4182	75.9843	1.08467
1	MIA PaCa2	D14_3	0.01	1_D14_3_76	G1	34	14	140	2.33333	81.5686	81.5686	75.0842	1.08636
1	MIA PaCa2	D14_3	0.01	1_D14_3_76	G1	35	15	150	2.5	81.4555	81.4555	75.707	1.07593
1	MIA PaCa2	D14_3	0.01	1_D14_3_76	G1	36	16	160	2.66667	80.8245	80.8245	74.2775	1.08814
1	MIA PaCa2	D14_3	0.01	1_D14_3_76	G1	37	17	170	2.83333	82.76	82.76	73.2738	1.12946
1	MIA PaCa2	D14_3	0.01	1_D14_3_76	G1	38	18	180	3	81.2606	81.2606	73.1743	1.11051
1	MIA PaCa2	D14_3	0.01	1_D14_3_76	G1	39	19	190	3.16667	79.9231	79.9231	72.5019	1.10236
1	MIA PaCa2	D14_3	0.01	1_D14_3_76	G1	40	20	200	3.33333	77.5856	77.5856	71.7669	1.08108
1	MIA PaCa2	D14_3	0.01	1_D14_3_76	G1	41	21	210	3.5	77.754	77.754	72.0161	1.07967
1	MIA PaCa2	D14_3	0.01	1_D14_3_76	G1	42	22	220	3.66667	77.0629	77.0629	71.8185	1.07302
1	MIA PaCa2	D14_3	0.01	1_D14_3_76	G1	43	23	230	3.83333	76.9414	76.9414	71.1314	1.08168
1	MIA PaCa2	D14_3	0.01	1_D14_3_76	G1	44	24	240	4	75.3243	75.3243	70.5922	1.06703
1	MIA PaCa2	D14_3	0.01	1_D14_3_76	G1	45	25	250	4.16667	82.9752	82.9752	70.3088	1.18015
1	MIA PaCa2	D14_3	0.01	1_D14_3_76	G1	46	26	260	4.33333	78.2538	78.2538	70.5953	1.10848
1	MIA PaCa2	D14_3	0.01	1_D14_3_76	G1	47	27	270	4.5	78.8754	78.8754	70.0862	1.12541
1	MIA PaCa2	D14_3	0.01	1_D14_3_76	G1	48	28	280	4.66667	80.6118	80.6118	69.4746	1.16031
1	MIA PaCa2	D14_3	0.01	1_D14_3_76	G1	49	29	290	4.83333	75.9967	75.9967	68.6304	1.10733
1	MIA PaCa2	D14_3	0.01	1_D14_3_76	G1	50	30	300	5	71.7525	71.7525	68.8548	1.04208
1	MIA PaCa2	D14_3	0.01	1_D14_3_76	G1	51	31	310	5.16667	71.5556	71.5556	68.1679	1.0497
1	MIA PaCa2	D14_3	0.01	1_D14_3_76	G1	52	32	320	5.33333	71.3739	71.3739	67.3507	1.05974
1	MIA PaCa2	D14_3	0.01	1_D14_3_76	G1	53	33	330	5.5	74.1994	74.1994	67.9219	1.09242
1	MIA PaCa2	D14_3	0.01	1_D14_3_76	G1	54	34	340	5.66667	74.9343	74.9343	68.0349	1.10141
1	MIA PaCa2	D14_3	0.01	1_D14_3_76	G1	55	35	350	5.83333	74.8018	74.8018	68.887	1.08586
1	MIA PaCa2	D14_3	0.01	1_D14_3_76	G1	56	36	360	6	76.4937	76.4937	68.1633	1.12221
1	MIA PaCa2	D14_3	0.01	1_D14_3_76	G1	57	37	370	6.16667	75.0476	75.0476	67.2471	1.116
1	MIA PaCa2	D14_3	0.01	1_D14_3_76	G1	58	38	380	6.33333	73	73	67.1163	1.08766
1	MIA PaCa2	D14_3	0.01	1_D14_3_76	G1	59	39	390	6.5	72.2835	72.2835	66.9979	1.07889
1	MIA PaCa2	D14_3	0.01	1_D14_3_76	G1	60	40	400	6.66667	71.9172	71.9172	66.8466	1.07585
1	MIA PaCa2	D14_3	0.01	1_D14_3_76	G1	61	41	410	6.83333	69.659	69.659	66.872	1.04168
1	MIA PaCa2	D14_3	0.01	1_D14_3_76	G1	62	42	420	7	70.0453	70.0453	67.4151	1.03902
1	MIA PaCa2	D14_3	0.01	1_D14_3_76	G1	63	43	430	7.16667	69.2555	69.2555	66.593	1.03998
1	MIA PaCa2	D14_3	0.01	1_D14_3_76	G1	64	44	440	7.33333	69.929	69.929	64.9413	1.0768
1	MIA PaCa2	D14_3	0.01	1_D14_3_76	G1	65	45	450	7.5	73.7814	73.7814	65.8821	1.1199
1	MIA PaCa2	D14_3	0.01	1_D14_3_76	G1	66	46	460	7.66667	73.6065	73.6065	65.7717	1.11912
1	MIA PaCa2	D14_3	0.01	1_D14_3_76	G1	67	47	470	7.83333	72.116	72.116	65.9693	1.09318
1	MIA PaCa2	D14_3	0.01	1_D14_3_76	G1	68	48	480	8	71.0064	71.0064	65.2461	1.08829
1	MIA PaCa2	D14_3	0.01	1_D14_3_76	G1	69	49	490	8.16667	70.6258	70.6258	64.9541	1.08732
1	MIA PaCa2	D14_3	0.01	1_D14_3_76	G1	70	50	500	8.33333	68.7675	68.7675	64.7238	1.06248
1	MIA PaCa2	D14_3	0.01	1_D14_3_76	G1	71	51	510	8.5	71.2118	71.2118	64.8745	1.09769
1	MIA PaCa2	D14_3	0.01	1_D14_3_76	G1	72	52	520	8.66667	71.4704	71.4704	65.0075	1.09942
1	MIA PaCa2	D14_3	0.01	1_D14_3_76	G1	73	53	530	8.83333	69.9389	69.9389	64.3036	1.08764
1	MIA PaCa2	D14_3	0.01	1_D14_3_76	G1	74	54	540	9	70.9807	70.9807	64.0165	1.10879
1	MIA PaCa2	D14_3	0.01	1_D14_3_76	G1	75	55	550	9.16667	74.5909	74.5909	64.712	1.15266
1	MIA PaCa2	D14_3	0.01	1_D14_3_76	G1	76	56	560	9.33333	76.122	76.122	64.0422	1.18862
1	MIA PaCa2	D14_3	0.01	1_D14_3_76	G1	77	57	570	9.5	71.1041	71.1041	63.8764	1.11315
1	MIA PaCa2	D14_3	0.01	1_D14_3_76	G1	78	58	580	9.66667	70.7053	70.7053	63.7423	1.10924
1	MIA PaCa2	D14_3	0.01	1_D14_3_76	G1	79	59	590	9.83333	75.3527	75.3527	63.4249	1.18806
1	MIA PaCa2	D14_3	0.01	1_D14_3_76	G1	80	60	600	10	74.0034	74.0034	63.1512	1.17184
1	MIA PaCa2	D14_3	0.01	1_D14_3_76	G1	81	61	610	10.1667	73.3719	73.3719	63.2666	1.15973
1	MIA PaCa2	D14_3	0.01	1_D14_3_76	G1	82	62	620	10.3333	72.7742	72.7742	62.8471	1.15796
1	MIA PaCa2	D14_3	0.01	1_D14_3_76	G1	83	63	630	10.5	71.7949	71.7949	62.9485	1.14053
1	MIA PaCa2	D14_3	0.01	1_D14_3_76	G1	84	64	640	10.6667	68.1863	68.1863	63.5908	1.07227
1	MIA PaCa2	D14_3	0.01	1_D14_3_76	G1	85	65	650	10.8333	71.7241	71.7241	63.0209	1.1381
1	MIA PaCa2	D14_3	0.01	1_D14_3_76	G1	86	66	660	11	74.5232	74.5232	63.2933	1.17743
1	MIA PaCa2	D14_3	0.01	1_D14_3_76	G1	87	67	670	11.1667	74.8713	74.8713	61.9681	1.20822
1	MIA PaCa2	D14_3	0.01	1_D14_3_76	G1	88	68	680	11.3333	66.1467	66.1467	61.0898	1.08278
1	MIA PaCa2	D14_3	0.01	1_D14_3_76	G1	89	69	690	11.5	66.1167	66.1167	61.5941	1.07343
1	MIA PaCa2	D14_3	0.01	1_D14_3_76	G1	90	70	700	11.6667	67.8862	67.8862	62.8735	1.07973
1	MIA PaCa2	D14_3	0.01	1_D14_3_76	G1	91	71	710	11.8333	67.3758	67.3758	61.5615	1.09445
1	MIA PaCa2	D14_3	0.01	1_D14_3_76	G1	92	72	720	12	65.3177	65.3177	60.7859	1.07455
1	MIA PaCa2	D14_3	0.01	1_D14_3_76	G1	93	73	730	12.1667	67.9284	67.9284	60.8609	1.11613
1	MIA PaCa2	D14_3	0.01	1_D14_3_76	G1	94	74	740	12.3333	62.7219	62.7219	60.9904	1.02839
1	MIA PaCa2	D14_3	0.01	1_D14_3_76	G1	95	75	750	12.5	64.3114	64.3114	61.556	1.04476
1	MIA PaCa2	D14_3	0.01	1_D14_3_76	G1	96	76	760	12.6667	64.2287	64.2287	61.3403	1.04709
1	MIA PaCa2	D14_3	0.01	1_D14_3_76	G1	97	77	770	12.8333	72.4844	72.4844	61.6391	1.17595
1	MIA PaCa2	D14_3	0.01	1_D14_3_76	G1	98	78	780	13	68.3646	68.3646	60.4758	1.13045
1	MIA PaCa2	D14_4	0.01	1_D14_4_100	S	12	-8	-80	-1.33333	91.3065	91.3065	86.2825	1.05823
1	MIA PaCa2	D14_4	0.01	1_D14_4_100	S	14	-6	-60	-1	83.497	83.497	85.6506	0.974856
1	MIA PaCa2	D14_4	0.01	1_D14_4_100	S	15	-5	-50	-0.833333	83.5987	83.5987	84.1405	0.993561
1	MIA PaCa2	D14_4	0.01	1_D14_4_100	S	16	-4	-40	-0.666667	86.2249	86.2249	82.5286	1.04479
1	MIA PaCa2	D14_4	0.01	1_D14_4_100	S	17	-3	-30	-0.5	83.3893	83.3893	83.098	1.00351
1	MIA PaCa2	D14_4	0.01	1_D14_4_100	S	18	-2	-20	-0.333333	84.7719	84.7719	82.7797	1.02407
1	MIA PaCa2	D14_4	0.01	1_D14_4_100	S	19	-1	-10	-0.166667	82.1199	82.1199	82.0129	1.0013
1	MIA PaCa2	D14_4	0.01	1_D14_4_100	S	20	0	0	0	81.8312	81.8312	81.1847	1.00796
1	MIA PaCa2	D14_4	0.01	1_D14_4_100	S	21	1	10	0.166667	91.5448	91.5448	84.5183	1.08314
1	MIA PaCa2	D14_4	0.01	1_D14_4_100	S	22	2	20	0.333333	89.4252	89.4252	82.9015	1.07869
1	MIA PaCa2	D14_4	0.01	1_D14_4_100	S	23	3	30	0.5	95.89	95.89	82.0655	1.16846
1	MIA PaCa2	D14_4	0.01	1_D14_4_100	S	24	4	40	0.666667	97.704	97.704	80.9707	1.20666
1	MIA PaCa2	D14_4	0.01	1_D14_4_100	S	25	5	50	0.833333	96.955	96.955	80.691	1.20156
1	MIA PaCa2	D14_4	0.01	1_D14_4_100	S	26	6	60	1	92.0197	92.0197	79.6097	1.15589
1	MIA PaCa2	D14_4	0.01	1_D14_4_100	S	27	7	70	1.16667	93.1281	93.1281	79.1117	1.17717
1	MIA PaCa2	D14_4	0.01	1_D14_4_100	S	28	8	80	1.33333	89.8127	89.8127	78.0016	1.15142
1	MIA PaCa2	D14_4	0.01	1_D14_4_100	S	29	9	90	1.5	89.976	89.976	77.8528	1.15572
1	MIA PaCa2	D14_4	0.01	1_D14_4_100	S	30	10	100	1.66667	88.1886	88.1886	77.6698	1.13543
1	MIA PaCa2	D14_4	0.01	1_D14_4_100	S	31	11	110	1.83333	88.7799	88.7799	77.1169	1.15124
1	MIA PaCa2	D14_4	0.01	1_D14_4_100	S	32	12	120	2	90.785	90.785	76.7701	1.18256
1	MIA PaCa2	D14_4	0.01	1_D14_4_100	S	33	13	130	2.16667	91.147	91.147	75.9843	1.19955
1	MIA PaCa2	D14_4	0.01	1_D14_4_100	S	34	14	140	2.33333	90.827	90.827	75.0842	1.20967
1	MIA PaCa2	D14_4	0.01	1_D14_4_100	S	35	15	150	2.5	88.5533	88.5533	75.707	1.16968
1	MIA PaCa2	D14_4	0.01	1_D14_4_100	S	36	16	160	2.66667	89.719	89.719	74.2775	1.20789
1	MIA PaCa2	D14_4	0.01	1_D14_4_100	S	37	17	170	2.83333	85.4887	85.4887	73.2738	1.1667
1	MIA PaCa2	D14_4	0.01	1_D14_4_100	S	38	18	180	3	86.0503	86.0503	73.1743	1.17596
1	MIA PaCa2	D14_4	0.01	1_D14_4_100	S	39	19	190	3.16667	84.0353	84.0353	72.5019	1.15908
1	MIA PaCa2	D14_4	0.01	1_D14_4_100	S	40	20	200	3.33333	80.4933	80.4933	71.7669	1.12159
1	MIA PaCa2	D14_4	0.01	1_D14_4_100	S	41	21	210	3.5	82.1201	82.1201	72.0161	1.1403
1	MIA PaCa2	D14_4	0.01	1_D14_4_100	S	42	22	220	3.66667	82.936	82.936	71.8185	1.1548
1	MIA PaCa2	D14_4	0.01	1_D14_4_100	S	43	23	230	3.83333	79.9121	79.9121	71.1314	1.12344
1	MIA PaCa2	D14_4	0.01	1_D14_4_100	S	44	24	240	4	85.6279	85.6279	70.5922	1.21299
1	MIA PaCa2	D14_4	0.01	1_D14_4_100	S	45	25	250	4.16667	79.0096	79.0096	70.3088	1.12375
1	MIA PaCa2	D14_4	0.01	1_D14_4_100	S	46	26	260	4.33333	80.6484	80.6484	70.5953	1.1424
1	MIA PaCa2	D14_4	0.01	1_D14_4_100	S	47	27	270	4.5	76.5697	76.5697	70.0862	1.09251
1	MIA PaCa2	D14_4	0.01	1_D14_4_100	S	48	28	280	4.66667	75.2562	75.2562	69.4746	1.08322
1	MIA PaCa2	D14_4	0.01	1_D14_4_100	S	49	29	290	4.83333	73.7488	73.7488	68.6304	1.07458
1	MIA PaCa2	D14_4	0.01	1_D14_4_100	S	50	30	300	5	71.5872	71.5872	68.8548	1.03968
1	MIA PaCa2	D14_4	0.01	1_D14_4_100	S	51	31	310	5.16667	70.6	70.6	68.1679	1.03568
1	MIA PaCa2	D14_4	0.01	1_D14_4_100	S	52	32	320	5.33333	70.1941	70.1941	67.3507	1.04222
1	MIA PaCa2	D14_4	0.01	1_D14_4_100	S	53	33	330	5.5	70.3643	70.3643	67.9219	1.03596
1	MIA PaCa2	D14_4	0.01	1_D14_4_100	S	54	34	340	5.66667	70.1566	70.1566	68.0349	1.03119
1	MIA PaCa2	D14_4	0.01	1_D14_4_100	S	55	35	350	5.83333	69.7591	69.7591	68.887	1.01266
1	MIA PaCa2	D14_4	0.01	1_D14_4_100	S	56	36	360	6	68.3705	68.3705	68.1633	1.00304
1	MIA PaCa2	D14_4	0.01	1_D14_4_100	S	57	37	370	6.16667	67.5402	67.5402	67.2471	1.00436
1	MIA PaCa2	D14_4	0.01	1_D14_4_100	S	58	38	380	6.33333	67.8252	67.8252	67.1163	1.01056
1	MIA PaCa2	D14_4	0.01	1_D14_4_100	S	59	39	390	6.5	68.3424	68.3424	66.9979	1.02007
1	MIA PaCa2	D14_4	0.01	1_D14_4_100	S	60	40	400	6.66667	67.8484	67.8484	66.8466	1.01499
1	MIA PaCa2	D14_4	0.01	1_D14_4_100	S	61	41	410	6.83333	68.2888	68.2888	66.872	1.02119
1	MIA PaCa2	D14_4	0.01	1_D14_4_100	S	62	42	420	7	66.8981	66.8981	67.4151	0.992331
1	MIA PaCa2	D14_4	0.01	1_D14_4_100	S	63	43	430	7.16667	66.1553	66.1553	66.593	0.993427
1	MIA PaCa2	D14_4	0.01	1_D14_4_100	S	64	44	440	7.33333	65.5756	65.5756	64.9413	1.00977
1	MIA PaCa2	D14_4	0.01	1_D14_4_100	S	65	45	450	7.5	67.2389	67.2389	65.8821	1.02059
1	MIA PaCa2	D14_4	0.01	1_D14_4_100	S	66	46	460	7.66667	66.932	66.932	65.7717	1.01764
1	MIA PaCa2	D14_4	0.01	1_D14_4_100	S	67	47	470	7.83333	67.2721	67.2721	65.9693	1.01975
1	MIA PaCa2	D14_4	0.01	1_D14_4_100	S	68	48	480	8	67.8463	67.8463	65.2461	1.03985
1	MIA PaCa2	D14_4	0.01	1_D14_4_100	S	69	49	490	8.16667	65.92	65.92	64.9541	1.01487
1	MIA PaCa2	D14_4	0.01	1_D14_4_100	S	70	50	500	8.33333	64.9849	64.9849	64.7238	1.00403
1	MIA PaCa2	D14_4	0.01	1_D14_4_100	S	71	51	510	8.5	63.3714	63.3714	64.8745	0.976831
1	MIA PaCa2	D14_4	0.01	1_D14_4_100	S	72	52	520	8.66667	63.3088	63.3088	65.0075	0.973869
1	MIA PaCa2	D14_4	0.01	1_D14_4_100	S	73	53	530	8.83333	62.44	62.44	64.3036	0.971019
1	MIA PaCa2	D14_4	0.01	1_D14_4_100	S	74	54	540	9	62.2895	62.2895	64.0165	0.973023
1	MIA PaCa2	D14_4	0.01	1_D14_4_100	S	75	55	550	9.16667	61.6086	61.6086	64.712	0.952043
1	MIA PaCa2	D14_4	0.01	1_D14_4_100	S	76	56	560	9.33333	62.1962	62.1962	64.0422	0.971175
1	MIA PaCa2	D14_4	0.01	1_D14_4_100	S	77	57	570	9.5	63.3841	63.3841	63.8764	0.992292
1	MIA PaCa2	D14_4	0.01	1_D14_4_100	S	78	58	580	9.66667	62.4706	62.4706	63.7423	0.98005
1	MIA PaCa2	D14_4	0.01	1_D14_4_100	S	79	59	590	9.83333	61.7016	61.7016	63.4249	0.97283
1	MIA PaCa2	D14_4	0.01	1_D14_4_100	S	80	60	600	10	63.7373	63.7373	63.1512	1.00928
1	MIA PaCa2	D14_4	0.01	1_D14_4_100	S	81	61	610	10.1667	62.7656	62.7656	63.2666	0.992081
1	MIA PaCa2	D14_4	0.01	1_D14_4_100	S	82	62	620	10.3333	61.8735	61.8735	62.8471	0.984508
1	MIA PaCa2	D14_4	0.01	1_D14_4_100	S	83	63	630	10.5	61.4444	61.4444	62.9485	0.976105
1	MIA PaCa2	D14_4	0.01	1_D14_4_100	S	84	64	640	10.6667	61.5079	61.5079	63.5908	0.967246
1	MIA PaCa2	D14_4	0.01	1_D14_4_100	S	85	65	650	10.8333	60.5147	60.5147	63.0209	0.960232
1	MIA PaCa2	D14_4	0.01	1_D14_4_100	S	86	66	660	11	61.7549	61.7549	63.2933	0.975694
1	MIA PaCa2	D14_4	0.01	1_D14_4_100	S	87	67	670	11.1667	60.6763	60.6763	61.9681	0.979154
1	MIA PaCa2	D14_4	0.01	1_D14_4_100	S	88	68	680	11.3333	61.1953	61.1953	61.0898	1.00173
1	MIA PaCa2	D14_4	0.01	1_D14_4_100	S	89	69	690	11.5	64.9378	64.9378	61.5941	1.05429
1	MIA PaCa2	D14_4	0.01	1_D14_4_102	S	10	-10	-100	-1.66667	86.5191	86.5191	88.0257	0.982885
1	MIA PaCa2	D14_4	0.01	1_D14_4_102	S	11	-9	-90	-1.5	84.0145	84.0145	87.39	0.961374
1	MIA PaCa2	D14_4	0.01	1_D14_4_102	S	12	-8	-80	-1.33333	83.6014	83.6014	86.2825	0.968926
1	MIA PaCa2	D14_4	0.01	1_D14_4_102	S	13	-7	-70	-1.16667	82.9461	82.9461	84.872	0.977308
1	MIA PaCa2	D14_4	0.01	1_D14_4_102	S	14	-6	-60	-1	82.2138	82.2138	85.6506	0.959874
1	MIA PaCa2	D14_4	0.01	1_D14_4_102	S	15	-5	-50	-0.833333	85.8962	85.8962	84.1405	1.02087
1	MIA PaCa2	D14_4	0.01	1_D14_4_102	S	16	-4	-40	-0.666667	84.8901	84.8901	82.5286	1.02861
1	MIA PaCa2	D14_4	0.01	1_D14_4_102	S	17	-3	-30	-0.5	84.9662	84.9662	83.098	1.02248
1	MIA PaCa2	D14_4	0.01	1_D14_4_102	S	18	-2	-20	-0.333333	81.9065	81.9065	82.7797	0.989451
1	MIA PaCa2	D14_4	0.01	1_D14_4_102	S	19	-1	-10	-0.166667	79.2048	79.2048	82.0129	0.96576
1	MIA PaCa2	D14_4	0.01	1_D14_4_102	S	20	0	0	0	78.5935	78.5935	81.1847	0.968082
1	MIA PaCa2	D14_4	0.01	1_D14_4_102	S	21	1	10	0.166667	82.7179	82.7179	84.5183	0.978698
1	MIA PaCa2	D14_4	0.01	1_D14_4_102	S	22	2	20	0.333333	84.686	84.686	82.9015	1.02153
1	MIA PaCa2	D14_4	0.01	1_D14_4_102	S	23	3	30	0.5	85.4714	85.4714	82.0655	1.0415
1	MIA PaCa2	D14_4	0.01	1_D14_4_102	S	24	4	40	0.666667	87.7211	87.7211	80.9707	1.08337
1	MIA PaCa2	D14_4	0.01	1_D14_4_102	S	25	5	50	0.833333	92.1254	92.1254	80.691	1.14171
1	MIA PaCa2	D14_4	0.01	1_D14_4_102	S	26	6	60	1	91.8932	91.8932	79.6097	1.1543
1	MIA PaCa2	D14_4	0.01	1_D14_4_102	S	27	7	70	1.16667	90.3322	90.3322	79.1117	1.14183
1	MIA PaCa2	D14_4	0.01	1_D14_4_102	S	28	8	80	1.33333	88.6458	88.6458	78.0016	1.13646
1	MIA PaCa2	D14_4	0.01	1_D14_4_102	S	29	9	90	1.5	88.2109	88.2109	77.8528	1.13305
1	MIA PaCa2	D14_4	0.01	1_D14_4_102	S	30	10	100	1.66667	83.9725	83.9725	77.6698	1.08115
1	MIA PaCa2	D14_4	0.01	1_D14_4_102	S	31	11	110	1.83333	83.7933	83.7933	77.1169	1.08657
1	MIA PaCa2	D14_4	0.01	1_D14_4_102	S	32	12	120	2	84.7756	84.7756	76.7701	1.10428
1	MIA PaCa2	D14_4	0.01	1_D14_4_102	S	33	13	130	2.16667	88.8511	88.8511	75.9843	1.16933
1	MIA PaCa2	D14_4	0.01	1_D14_4_102	S	34	14	140	2.33333	87.7067	87.7067	75.0842	1.16811
1	MIA PaCa2	D14_4	0.01	1_D14_4_102	S	35	15	150	2.5	88.2685	88.2685	75.707	1.16592
1	MIA PaCa2	D14_4	0.01	1_D14_4_102	S	36	16	160	2.66667	89.0974	89.0974	74.2775	1.19952
1	MIA PaCa2	D14_4	0.01	1_D14_4_102	S	37	17	170	2.83333	86.4914	86.4914	73.2738	1.18039
1	MIA PaCa2	D14_4	0.01	1_D14_4_102	S	38	18	180	3	88.4235	88.4235	73.1743	1.2084
1	MIA PaCa2	D14_4	0.01	1_D14_4_102	S	39	19	190	3.16667	85.472	85.472	72.5019	1.17889
1	MIA PaCa2	D14_4	0.01	1_D14_4_102	S	40	20	200	3.33333	86.4934	86.4934	71.7669	1.2052
1	MIA PaCa2	D14_4	0.01	1_D14_4_102	S	41	21	210	3.5	87.1672	87.1672	72.0161	1.21038
1	MIA PaCa2	D14_4	0.01	1_D14_4_102	S	42	22	220	3.66667	89.5153	89.5153	71.8185	1.24641
1	MIA PaCa2	D14_4	0.01	1_D14_4_102	S	43	23	230	3.83333	85.0712	85.0712	71.1314	1.19597
1	MIA PaCa2	D14_4	0.01	1_D14_4_102	S	44	24	240	4	85.9067	85.9067	70.5922	1.21694
1	MIA PaCa2	D14_4	0.01	1_D14_4_102	S	45	25	250	4.16667	82.1222	82.1222	70.3088	1.16802
1	MIA PaCa2	D14_4	0.01	1_D14_4_102	S	46	26	260	4.33333	84.0745	84.0745	70.5953	1.19094
1	MIA PaCa2	D14_4	0.01	1_D14_4_102	S	47	27	270	4.5	84.8865	84.8865	70.0862	1.21117
1	MIA PaCa2	D14_4	0.01	1_D14_4_102	S	48	28	280	4.66667	80.819	80.819	69.4746	1.16329
1	MIA PaCa2	D14_4	0.01	1_D14_4_102	S	49	29	290	4.83333	81.1601	81.1601	68.6304	1.18257
1	MIA PaCa2	D14_4	0.01	1_D14_4_102	S	50	30	300	5	82.255	82.255	68.8548	1.19461
1	MIA PaCa2	D14_4	0.01	1_D14_4_102	S	51	31	310	5.16667	80.6799	80.6799	68.1679	1.18355
1	MIA PaCa2	D14_4	0.01	1_D14_4_102	S	52	32	320	5.33333	75.2345	75.2345	67.3507	1.11706
1	MIA PaCa2	D14_4	0.01	1_D14_4_102	S	53	33	330	5.5	75.6006	75.6006	67.9219	1.11305
1	MIA PaCa2	D14_4	0.01	1_D14_4_102	S	54	34	340	5.66667	75.6983	75.6983	68.0349	1.11264
1	MIA PaCa2	D14_4	0.01	1_D14_4_102	S	55	35	350	5.83333	76.1763	76.1763	68.887	1.10581
1	MIA PaCa2	D14_4	0.01	1_D14_4_102	S	56	36	360	6	76.8607	76.8607	68.1633	1.1276
1	MIA PaCa2	D14_4	0.01	1_D14_4_102	S	57	37	370	6.16667	75.3118	75.3118	67.2471	1.11993
1	MIA PaCa2	D14_4	0.01	1_D14_4_102	S	58	38	380	6.33333	76.1685	76.1685	67.1163	1.13487
1	MIA PaCa2	D14_4	0.01	1_D14_4_102	S	59	39	390	6.5	75.5969	75.5969	66.9979	1.12835
1	MIA PaCa2	D14_4	0.01	1_D14_4_102	S	60	40	400	6.66667	78.2928	78.2928	66.8466	1.17123
1	MIA PaCa2	D14_4	0.01	1_D14_4_102	S	61	41	410	6.83333	74.4316	74.4316	66.872	1.11305
1	MIA PaCa2	D14_4	0.01	1_D14_4_102	S	62	42	420	7	75.9515	75.9515	67.4151	1.12662
1	MIA PaCa2	D14_4	0.01	1_D14_4_102	S	63	43	430	7.16667	75.0321	75.0321	66.593	1.12673
1	MIA PaCa2	D14_4	0.01	1_D14_4_102	S	64	44	440	7.33333	72.6183	72.6183	64.9413	1.11821
1	MIA PaCa2	D14_4	0.01	1_D14_4_102	S	65	45	450	7.5	73.0583	73.0583	65.8821	1.10892
1	MIA PaCa2	D14_4	0.01	1_D14_4_102	S	66	46	460	7.66667	70.5441	70.5441	65.7717	1.07256
1	MIA PaCa2	D14_4	0.01	1_D14_4_102	S	67	47	470	7.83333	71.9639	71.9639	65.9693	1.09087
1	MIA PaCa2	D14_4	0.01	1_D14_4_102	S	68	48	480	8	72.0136	72.0136	65.2461	1.10372
1	MIA PaCa2	D14_4	0.01	1_D14_4_102	S	69	49	490	8.16667	71.1913	71.1913	64.9541	1.09602
1	MIA PaCa2	D14_4	0.01	1_D14_4_102	S	70	50	500	8.33333	71.867	71.867	64.7238	1.11036
1	MIA PaCa2	D14_4	0.01	1_D14_4_102	S	71	51	510	8.5	72.226	72.226	64.8745	1.11332
1	MIA PaCa2	D14_4	0.01	1_D14_4_102	S	72	52	520	8.66667	71.6314	71.6314	65.0075	1.10189
1	MIA PaCa2	D14_4	0.01	1_D14_4_102	S	73	53	530	8.83333	73.3179	73.3179	64.3036	1.14018
1	MIA PaCa2	D14_4	0.01	1_D14_4_102	S	74	54	540	9	75.0645	75.0645	64.0165	1.17258
1	MIA PaCa2	D14_4	0.01	1_D14_4_102	S	75	55	550	9.16667	72.2338	72.2338	64.712	1.11624
1	MIA PaCa2	D14_4	0.01	1_D14_4_102	S	76	56	560	9.33333	72.2069	72.2069	64.0422	1.12749
1	MIA PaCa2	D14_4	0.01	1_D14_4_102	S	77	57	570	9.5	71.3243	71.3243	63.8764	1.1166
1	MIA PaCa2	D14_4	0.01	1_D14_4_102	S	78	58	580	9.66667	70.5266	70.5266	63.7423	1.10643
1	MIA PaCa2	D14_4	0.01	1_D14_4_102	S	79	59	590	9.83333	72.0222	72.0222	63.4249	1.13555
1	MIA PaCa2	D14_4	0.01	1_D14_4_102	S	80	60	600	10	71.4821	71.4821	63.1512	1.13192
1	MIA PaCa2	D14_4	0.01	1_D14_4_102	S	81	61	610	10.1667	69.8899	69.8899	63.2666	1.10469
1	MIA PaCa2	D14_4	0.01	1_D14_4_102	S	82	62	620	10.3333	68.3661	68.3661	62.8471	1.08782
1	MIA PaCa2	D14_4	0.01	1_D14_4_102	S	83	63	630	10.5	70.2971	70.2971	62.9485	1.11674
1	MIA PaCa2	D14_4	0.01	1_D14_4_102	S	84	64	640	10.6667	70.3571	70.3571	63.5908	1.1064
1	MIA PaCa2	D14_4	0.01	1_D14_4_102	S	85	65	650	10.8333	71.3267	71.3267	63.0209	1.13179
1	MIA PaCa2	D14_4	0.01	1_D14_4_102	S	86	66	660	11	70.6147	70.6147	63.2933	1.11567
1	MIA PaCa2	D14_4	0.01	1_D14_4_102	S	87	67	670	11.1667	69.4196	69.4196	61.9681	1.12025
1	MIA PaCa2	D14_4	0.01	1_D14_4_102	S	88	68	680	11.3333	68.0521	68.0521	61.0898	1.11397
1	MIA PaCa2	D14_4	0.01	1_D14_4_102	S	89	69	690	11.5	66.2643	66.2643	61.5941	1.07582
1	MIA PaCa2	D14_4	0.01	1_D14_4_102	S	90	70	700	11.6667	68.8377	68.8377	62.8735	1.09486
1	MIA PaCa2	D14_4	0.01	1_D14_4_102	S	91	71	710	11.8333	66.4198	66.4198	61.5615	1.07892
1	MIA PaCa2	D14_4	0.01	1_D14_4_102	S	92	72	720	12	63.7151	63.7151	60.7859	1.04819
1	MIA PaCa2	D14_4	0.01	1_D14_4_102	S	93	73	730	12.1667	65.7896	65.7896	60.8609	1.08098
1	MIA PaCa2	D14_4	0.01	1_D14_4_102	S	94	74	740	12.3333	65.6503	65.6503	60.9904	1.0764
1	MIA PaCa2	D14_4	0.01	1_D14_4_102	S	95	75	750	12.5	66.7062	66.7062	61.556	1.08367
1	MIA PaCa2	D14_4	0.01	1_D14_4_104	S	11	-9	-90	-1.5	91.3592	91.3592	87.39	1.04542
1	MIA PaCa2	D14_4	0.01	1_D14_4_104	S	12	-8	-80	-1.33333	91.5287	91.5287	86.2825	1.0608
1	MIA PaCa2	D14_4	0.01	1_D14_4_104	S	13	-7	-70	-1.16667	85.3556	85.3556	84.872	1.0057
1	MIA PaCa2	D14_4	0.01	1_D14_4_104	S	14	-6	-60	-1	89.0571	89.0571	85.6506	1.03977
1	MIA PaCa2	D14_4	0.01	1_D14_4_104	S	15	-5	-50	-0.833333	89.8545	89.8545	84.1405	1.06791
1	MIA PaCa2	D14_4	0.01	1_D14_4_104	S	16	-4	-40	-0.666667	88.2448	88.2448	82.5286	1.06926
1	MIA PaCa2	D14_4	0.01	1_D14_4_104	S	17	-3	-30	-0.5	88.2059	88.2059	83.098	1.06147
1	MIA PaCa2	D14_4	0.01	1_D14_4_104	S	18	-2	-20	-0.333333	85.6908	85.6908	82.7797	1.03517
1	MIA PaCa2	D14_4	0.01	1_D14_4_104	S	19	-1	-10	-0.166667	87.6053	87.6053	82.0129	1.06819
1	MIA PaCa2	D14_4	0.01	1_D14_4_104	S	20	0	0	0	90.6799	90.6799	81.1847	1.11696
1	MIA PaCa2	D14_4	0.01	1_D14_4_104	S	21	1	10	0.166667	91.9164	91.9164	84.5183	1.08753
1	MIA PaCa2	D14_4	0.01	1_D14_4_104	S	22	2	20	0.333333	92.1351	92.1351	82.9015	1.11138
1	MIA PaCa2	D14_4	0.01	1_D14_4_104	S	23	3	30	0.5	90.3352	90.3352	82.0655	1.10077
1	MIA PaCa2	D14_4	0.01	1_D14_4_104	S	24	4	40	0.666667	86.6773	86.6773	80.9707	1.07048
1	MIA PaCa2	D14_4	0.01	1_D14_4_104	S	25	5	50	0.833333	89.2888	89.2888	80.691	1.10655
1	MIA PaCa2	D14_4	0.01	1_D14_4_104	S	26	6	60	1	86.0943	86.0943	79.6097	1.08146
1	MIA PaCa2	D14_4	0.01	1_D14_4_104	S	27	7	70	1.16667	86.6783	86.6783	79.1117	1.09565
1	MIA PaCa2	D14_4	0.01	1_D14_4_104	S	28	8	80	1.33333	86.4743	86.4743	78.0016	1.10862
1	MIA PaCa2	D14_4	0.01	1_D14_4_104	S	29	9	90	1.5	84.7224	84.7224	77.8528	1.08824
1	MIA PaCa2	D14_4	0.01	1_D14_4_104	S	30	10	100	1.66667	83.526	83.526	77.6698	1.0754
1	MIA PaCa2	D14_4	0.01	1_D14_4_104	S	31	11	110	1.83333	84.5608	84.5608	77.1169	1.09653
1	MIA PaCa2	D14_4	0.01	1_D14_4_104	S	32	12	120	2	84.775	84.775	76.7701	1.10427
1	MIA PaCa2	D14_4	0.01	1_D14_4_104	S	33	13	130	2.16667	83.703	83.703	75.9843	1.10158
1	MIA PaCa2	D14_4	0.01	1_D14_4_104	S	34	14	140	2.33333	84.7923	84.7923	75.0842	1.1293
1	MIA PaCa2	D14_4	0.01	1_D14_4_104	S	35	15	150	2.5	82.512	82.512	75.707	1.08989
1	MIA PaCa2	D14_4	0.01	1_D14_4_104	S	36	16	160	2.66667	81.9258	81.9258	74.2775	1.10297
1	MIA PaCa2	D14_4	0.01	1_D14_4_104	S	37	17	170	2.83333	78.4248	78.4248	73.2738	1.0703
1	MIA PaCa2	D14_4	0.01	1_D14_4_104	S	38	18	180	3	81.4365	81.4365	73.1743	1.11291
1	MIA PaCa2	D14_4	0.01	1_D14_4_104	S	39	19	190	3.16667	79.7624	79.7624	72.5019	1.10014
1	MIA PaCa2	D14_4	0.01	1_D14_4_104	S	40	20	200	3.33333	78.7492	78.7492	71.7669	1.09729
1	MIA PaCa2	D14_4	0.01	1_D14_4_104	S	41	21	210	3.5	84.1318	84.1318	72.0161	1.16824
1	MIA PaCa2	D14_4	0.01	1_D14_4_104	S	42	22	220	3.66667	81.9185	81.9185	71.8185	1.14063
1	MIA PaCa2	D14_4	0.01	1_D14_4_104	S	43	23	230	3.83333	81.5465	81.5465	71.1314	1.14642
1	MIA PaCa2	D14_4	0.01	1_D14_4_104	S	44	24	240	4	83.1307	83.1307	70.5922	1.17762
1	MIA PaCa2	D14_4	0.01	1_D14_4_104	S	45	25	250	4.16667	81.8886	81.8886	70.3088	1.1647
1	MIA PaCa2	D14_4	0.01	1_D14_4_104	S	46	26	260	4.33333	82.1515	82.1515	70.5953	1.1637
1	MIA PaCa2	D14_4	0.01	1_D14_4_104	S	47	27	270	4.5	76.4939	76.4939	70.0862	1.09143
1	MIA PaCa2	D14_4	0.01	1_D14_4_104	S	48	28	280	4.66667	77.7951	77.7951	69.4746	1.11976
1	MIA PaCa2	D14_4	0.01	1_D14_4_104	S	49	29	290	4.83333	77.7844	77.7844	68.6304	1.13338
1	MIA PaCa2	D14_4	0.01	1_D14_4_104	S	50	30	300	5	73.9527	73.9527	68.8548	1.07404
1	MIA PaCa2	D14_4	0.01	1_D14_4_104	S	51	31	310	5.16667	74.4393	74.4393	68.1679	1.092
1	MIA PaCa2	D14_4	0.01	1_D14_4_104	S	52	32	320	5.33333	74.0854	74.0854	67.3507	1.09999
1	MIA PaCa2	D14_4	0.01	1_D14_4_104	S	53	33	330	5.5	75.4367	75.4367	67.9219	1.11064
1	MIA PaCa2	D14_4	0.01	1_D14_4_104	S	54	34	340	5.66667	76.1843	76.1843	68.0349	1.11978
1	MIA PaCa2	D14_4	0.01	1_D14_4_104	S	55	35	350	5.83333	76.4448	76.4448	68.887	1.10971
1	MIA PaCa2	D14_4	0.01	1_D14_4_104	S	56	36	360	6	80.3596	80.3596	68.1633	1.17893
1	MIA PaCa2	D14_4	0.01	1_D14_4_104	S	57	37	370	6.16667	75.0847	75.0847	67.2471	1.11655
1	MIA PaCa2	D14_4	0.01	1_D14_4_104	S	58	38	380	6.33333	75.7221	75.7221	67.1163	1.12822
1	MIA PaCa2	D14_4	0.01	1_D14_4_104	S	59	39	390	6.5	78.3577	78.3577	66.9979	1.16956
1	MIA PaCa2	D14_4	0.01	1_D14_4_104	S	60	40	400	6.66667	77.5711	77.5711	66.8466	1.16043
1	MIA PaCa2	D14_4	0.01	1_D14_4_104	S	61	41	410	6.83333	82.716	82.716	66.872	1.23693
1	MIA PaCa2	D14_4	0.01	1_D14_4_106	G1	15	-5	-50	-0.833333	92.1415	92.1415	84.1405	1.09509
1	MIA PaCa2	D14_4	0.01	1_D14_4_106	G1	16	-4	-40	-0.666667	92.0714	92.0714	82.5286	1.11563
1	MIA PaCa2	D14_4	0.01	1_D14_4_106	G1	17	-3	-30	-0.5	83.6465	83.6465	83.098	1.0066
1	MIA PaCa2	D14_4	0.01	1_D14_4_106	G1	18	-2	-20	-0.333333	82.5	82.5	82.7797	0.996621
1	MIA PaCa2	D14_4	0.01	1_D14_4_106	G1	19	-1	-10	-0.166667	80.9505	80.9505	82.0129	0.987046
1	MIA PaCa2	D14_4	0.01	1_D14_4_106	G1	20	0	0	0	82.6441	82.6441	81.1847	1.01798
1	MIA PaCa2	D14_4	0.01	1_D14_4_106	G1	21	1	10	0.166667	82.7048	82.7048	84.5183	0.978543
1	MIA PaCa2	D14_4	0.01	1_D14_4_106	G1	22	2	20	0.333333	85.2809	85.2809	82.9015	1.0287
1	MIA PaCa2	D14_4	0.01	1_D14_4_106	G1	23	3	30	0.5	85.5432	85.5432	82.0655	1.04238
1	MIA PaCa2	D14_4	0.01	1_D14_4_106	G1	24	4	40	0.666667	86.4465	86.4465	80.9707	1.06763
1	MIA PaCa2	D14_4	0.01	1_D14_4_106	G1	25	5	50	0.833333	87.304	87.304	80.691	1.08196
1	MIA PaCa2	D14_4	0.01	1_D14_4_106	G1	26	6	60	1	84.9722	84.9722	79.6097	1.06736
1	MIA PaCa2	D14_4	0.01	1_D14_4_106	G1	27	7	70	1.16667	84.0122	84.0122	79.1117	1.06194
1	MIA PaCa2	D14_4	0.01	1_D14_4_106	G1	28	8	80	1.33333	77.4703	77.4703	78.0016	0.993189
1	MIA PaCa2	D14_4	0.01	1_D14_4_106	G1	29	9	90	1.5	77.9578	77.9578	77.8528	1.00135
1	MIA PaCa2	D14_4	0.01	1_D14_4_106	G1	30	10	100	1.66667	77.6694	77.6694	77.6698	0.999994
1	MIA PaCa2	D14_4	0.01	1_D14_4_106	G1	31	11	110	1.83333	75.8393	75.8393	77.1169	0.983432
1	MIA PaCa2	D14_4	0.01	1_D14_4_106	G1	33	13	130	2.16667	76.3383	76.3383	75.9843	1.00466
1	MIA PaCa2	D14_4	0.01	1_D14_4_106	G1	34	14	140	2.33333	80.6744	80.6744	75.0842	1.07445
1	MIA PaCa2	D14_4	0.01	1_D14_4_106	G1	35	15	150	2.5	77.7581	77.7581	75.707	1.02709
1	MIA PaCa2	D14_4	0.01	1_D14_4_106	G1	36	16	160	2.66667	81.0683	81.0683	74.2775	1.09142
1	MIA PaCa2	D14_4	0.01	1_D14_4_106	G1	37	17	170	2.83333	75.5447	75.5447	73.2738	1.03099
1	MIA PaCa2	D14_4	0.01	1_D14_4_106	G1	38	18	180	3	74.1049	74.1049	73.1743	1.01272
1	MIA PaCa2	D14_4	0.01	1_D14_4_106	G1	39	19	190	3.16667	76.4947	76.4947	72.5019	1.05507
1	MIA PaCa2	D14_4	0.01	1_D14_4_106	G1	40	20	200	3.33333	72.8859	72.8859	71.7669	1.01559
1	MIA PaCa2	D14_4	0.01	1_D14_4_106	G1	41	21	210	3.5	73.9739	73.9739	72.0161	1.02719
1	MIA PaCa2	D14_4	0.01	1_D14_4_106	G1	42	22	220	3.66667	72.171	72.171	71.8185	1.00491
1	MIA PaCa2	D14_4	0.01	1_D14_4_106	G1	43	23	230	3.83333	71.6465	71.6465	71.1314	1.00724
1	MIA PaCa2	D14_4	0.01	1_D14_4_106	G1	44	24	240	4	71.5126	71.5126	70.5922	1.01304
1	MIA PaCa2	D14_4	0.01	1_D14_4_106	G1	45	25	250	4.16667	69.8095	69.8095	70.3088	0.992898
1	MIA PaCa2	D14_4	0.01	1_D14_4_106	G1	46	26	260	4.33333	69.7703	69.7703	70.5953	0.988314
1	MIA PaCa2	D14_4	0.01	1_D14_4_106	G1	47	27	270	4.5	69.95	69.95	70.0862	0.998057
1	MIA PaCa2	D14_4	0.01	1_D14_4_106	G1	48	28	280	4.66667	71.0511	71.0511	69.4746	1.02269
1	MIA PaCa2	D14_4	0.01	1_D14_4_106	G1	49	29	290	4.83333	72.5213	72.5213	68.6304	1.05669
1	MIA PaCa2	D14_4	0.01	1_D14_4_106	G1	50	30	300	5	70.4709	70.4709	68.8548	1.02347
1	MIA PaCa2	D14_4	0.01	1_D14_4_106	G1	51	31	310	5.16667	67.2553	67.2553	68.1679	0.986613
1	MIA PaCa2	D14_4	0.01	1_D14_4_106	G1	52	32	320	5.33333	67.2783	67.2783	67.3507	0.998925
1	MIA PaCa2	D14_4	0.01	1_D14_4_106	G1	53	33	330	5.5	68.3006	68.3006	67.9219	1.00557
1	MIA PaCa2	D14_4	0.01	1_D14_4_106	G1	54	34	340	5.66667	70.2579	70.2579	68.0349	1.03267
1	MIA PaCa2	D14_4	0.01	1_D14_4_106	G1	55	35	350	5.83333	73.3404	73.3404	68.887	1.06465
1	MIA PaCa2	D14_4	0.01	1_D14_4_106	G1	56	36	360	6	72.0857	72.0857	68.1633	1.05754
1	MIA PaCa2	D14_4	0.01	1_D14_4_106	G1	57	37	370	6.16667	68.0204	68.0204	67.2471	1.0115
1	MIA PaCa2	D14_4	0.01	1_D14_4_106	G1	58	38	380	6.33333	69.6649	69.6649	67.1163	1.03797
1	MIA PaCa2	D14_4	0.01	1_D14_4_106	G1	59	39	390	6.5	67.558	67.558	66.9979	1.00836
1	MIA PaCa2	D14_4	0.01	1_D14_4_106	G1	60	40	400	6.66667	66.9167	66.9167	66.8466	1.00105
1	MIA PaCa2	D14_4	0.01	1_D14_4_106	G1	61	41	410	6.83333	67.8082	67.8082	66.872	1.014
1	MIA PaCa2	D14_4	0.01	1_D14_4_106	G1	62	42	420	7	68.3844	68.3844	67.4151	1.01438
1	MIA PaCa2	D14_4	0.01	1_D14_4_106	G1	63	43	430	7.16667	67.0617	67.0617	66.593	1.00704
1	MIA PaCa2	D14_4	0.01	1_D14_4_106	G1	64	44	440	7.33333	64.8709	64.8709	64.9413	0.998916
1	MIA PaCa2	D14_4	0.01	1_D14_4_106	G1	65	45	450	7.5	67.9035	67.9035	65.8821	1.03068
1	MIA PaCa2	D14_4	0.01	1_D14_4_106	G1	66	46	460	7.66667	67.3508	67.3508	65.7717	1.02401
1	MIA PaCa2	D14_4	0.01	1_D14_4_106	G1	67	47	470	7.83333	67.7163	67.7163	65.9693	1.02648
1	MIA PaCa2	D14_4	0.01	1_D14_4_106	G1	68	48	480	8	70.7286	70.7286	65.2461	1.08403
1	MIA PaCa2	D14_4	0.01	1_D14_4_106	G1	69	49	490	8.16667	70.2975	70.2975	64.9541	1.08226
1	MIA PaCa2	D14_4	0.01	1_D14_4_106	G1	70	50	500	8.33333	68.2092	68.2092	64.7238	1.05385
1	MIA PaCa2	D14_4	0.01	1_D14_4_106	G1	71	51	510	8.5	69.987	69.987	64.8745	1.07881
1	MIA PaCa2	D14_4	0.01	1_D14_4_106	G1	72	52	520	8.66667	68.8451	68.8451	65.0075	1.05903
1	MIA PaCa2	D14_4	0.01	1_D14_4_106	G1	73	53	530	8.83333	69.1319	69.1319	64.3036	1.07509
1	MIA PaCa2	D14_4	0.01	1_D14_4_106	G1	74	54	540	9	71.5734	71.5734	64.0165	1.11805
1	MIA PaCa2	D14_4	0.01	1_D14_4_106	G1	75	55	550	9.16667	66.1264	66.1264	64.712	1.02186
1	MIA PaCa2	D14_4	0.01	1_D14_4_106	G1	76	56	560	9.33333	66.0735	66.0735	64.0422	1.03172
1	MIA PaCa2	D14_4	0.01	1_D14_4_106	G1	77	57	570	9.5	66.6105	66.6105	63.8764	1.0428
1	MIA PaCa2	D14_4	0.01	1_D14_4_106	G1	78	58	580	9.66667	65.3499	65.3499	63.7423	1.02522
1	MIA PaCa2	D14_4	0.01	1_D14_4_106	G1	79	59	590	9.83333	64.3352	64.3352	63.4249	1.01435
1	MIA PaCa2	D14_4	0.01	1_D14_4_106	G1	80	60	600	10	64.0455	64.0455	63.1512	1.01416
1	MIA PaCa2	D14_4	0.01	1_D14_4_106	G1	81	61	610	10.1667	67.0833	67.0833	63.2666	1.06033
1	MIA PaCa2	D14_4	0.01	1_D14_4_106	G1	82	62	620	10.3333	67.5199	67.5199	62.8471	1.07435
1	MIA PaCa2	D14_4	0.01	1_D14_4_106	G1	83	63	630	10.5	64.8044	64.8044	62.9485	1.02948
1	MIA PaCa2	D14_4	0.01	1_D14_4_106	G1	84	64	640	10.6667	64.913	64.913	63.5908	1.02079
1	MIA PaCa2	D14_4	0.01	1_D14_4_106	G1	85	65	650	10.8333	64.9451	64.9451	63.0209	1.03053
1	MIA PaCa2	D14_4	0.01	1_D14_4_106	G1	86	66	660	11	65.0344	65.0344	63.2933	1.02751
1	MIA PaCa2	D14_4	0.01	1_D14_4_106	G1	87	67	670	11.1667	62.5489	62.5489	61.9681	1.00937
1	MIA PaCa2	D14_4	0.01	1_D14_4_106	G1	88	68	680	11.3333	61.4659	61.4659	61.0898	1.00616
1	MIA PaCa2	D14_4	0.01	1_D14_4_106	G1	89	69	690	11.5	62.9623	62.9623	61.5941	1.02221
1	MIA PaCa2	D14_4	0.01	1_D14_4_106	G1	90	70	700	11.6667	66.6889	66.6889	62.8735	1.06068
1	MIA PaCa2	D14_4	0.01	1_D14_4_106	G1	91	71	710	11.8333	66.9884	66.9884	61.5615	1.08815
1	MIA PaCa2	D14_4	0.01	1_D14_4_106	G1	92	72	720	12	66.0551	66.0551	60.7859	1.08668
1	MIA PaCa2	D14_4	0.01	1_D14_4_106	G1	93	73	730	12.1667	67.1354	67.1354	60.8609	1.1031
1	MIA PaCa2	D14_4	0.01	1_D14_4_106	G1	94	74	740	12.3333	66.346	66.346	60.9904	1.08781
1	MIA PaCa2	D14_4	0.01	1_D14_4_106	G1	95	75	750	12.5	66.9728	66.9728	61.556	1.088
1	MIA PaCa2	D14_4	0.01	1_D14_4_106	G1	96	76	760	12.6667	66.3139	66.3139	61.3403	1.08108
1	MIA PaCa2	D14_4	0.01	1_D14_4_106	G1	97	77	770	12.8333	69.7679	69.7679	61.6391	1.13188
1	MIA PaCa2	D14_4	0.01	1_D14_4_106	G1	98	78	780	13	65.0056	65.0056	60.4758	1.0749
1	MIA PaCa2	D14_4	0.01	1_D14_4_106	G1	99	79	790	13.1667	60.9597	60.9597	60.3963	1.00933
1	MIA PaCa2	D14_4	0.01	1_D14_4_106	G1	100	80	800	13.3333	65.0507	65.0507	60.7884	1.07012
1	MIA PaCa2	D14_4	0.01	1_D14_4_106	G1	101	81	810	13.5	73.2864	73.2864	60.3059	1.21524
1	MIA PaCa2	D14_4	0.01	1_D14_4_15	G2	1	-19	-190	-3.16667	112.337	112.337	98.9025	1.13583
1	MIA PaCa2	D14_4	0.01	1_D14_4_15	G2	2	-18	-180	-3	110.731	110.731	98.287	1.1266
1	MIA PaCa2	D14_4	0.01	1_D14_4_15	G2	3	-17	-170	-2.83333	107.306	107.306	95.5639	1.12287
1	MIA PaCa2	D14_4	0.01	1_D14_4_15	G2	4	-16	-160	-2.66667	105.751	105.751	94.8279	1.11519
1	MIA PaCa2	D14_4	0.01	1_D14_4_15	G2	5	-15	-150	-2.5	99.1489	99.1489	93.7282	1.05783
1	MIA PaCa2	D14_4	0.01	1_D14_4_15	G2	6	-14	-140	-2.33333	99.0689	99.0689	91.2043	1.08623
1	MIA PaCa2	D14_4	0.01	1_D14_4_15	G2	7	-13	-130	-2.16667	97.9548	97.9548	91.0398	1.07596
1	MIA PaCa2	D14_4	0.01	1_D14_4_15	G2	8	-12	-120	-2	97.4959	97.4959	89.9628	1.08374
1	MIA PaCa2	D14_4	0.01	1_D14_4_15	G2	9	-11	-110	-1.83333	100.489	100.489	88.8498	1.131
1	MIA PaCa2	D14_4	0.01	1_D14_4_15	G2	10	-10	-100	-1.66667	96.2992	96.2992	88.0257	1.09399
1	MIA PaCa2	D14_4	0.01	1_D14_4_15	G2	11	-9	-90	-1.5	96.2936	96.2936	87.39	1.10188
1	MIA PaCa2	D14_4	0.01	1_D14_4_15	G2	12	-8	-80	-1.33333	92.6027	92.6027	86.2825	1.07325
1	MIA PaCa2	D14_4	0.01	1_D14_4_15	G2	13	-7	-70	-1.16667	90.2893	90.2893	84.872	1.06383
1	MIA PaCa2	D14_4	0.01	1_D14_4_15	G2	14	-6	-60	-1	88.9143	88.9143	85.6506	1.0381
1	MIA PaCa2	D14_4	0.01	1_D14_4_15	G2	15	-5	-50	-0.833333	89.6324	89.6324	84.1405	1.06527
1	MIA PaCa2	D14_4	0.01	1_D14_4_15	G2	16	-4	-40	-0.666667	89.0193	89.0193	82.5286	1.07865
1	MIA PaCa2	D14_4	0.01	1_D14_4_15	G2	17	-3	-30	-0.5	90.4116	90.4116	83.098	1.08801
1	MIA PaCa2	D14_4	0.01	1_D14_4_15	G2	18	-2	-20	-0.333333	93.5496	93.5496	82.7797	1.1301
1	MIA PaCa2	D14_4	0.01	1_D14_4_15	G2	19	-1	-10	-0.166667	90.9153	90.9153	82.0129	1.10855
1	MIA PaCa2	D14_4	0.01	1_D14_4_15	G2	20	0	0	0	88.8889	88.8889	81.1847	1.0949
1	MIA PaCa2	D14_4	0.01	1_D14_4_15	G2	21	1	10	0.166667	93.2056	93.2056	84.5183	1.10279
1	MIA PaCa2	D14_4	0.01	1_D14_4_15	G2	22	2	20	0.333333	89.5714	89.5714	82.9015	1.08046
1	MIA PaCa2	D14_4	0.01	1_D14_4_15	G2	23	3	30	0.5	94.4555	94.4555	82.0655	1.15098
1	MIA PaCa2	D14_4	0.01	1_D14_4_15	G2	24	4	40	0.666667	90.8459	90.8459	80.9707	1.12196
1	MIA PaCa2	D14_4	0.01	1_D14_4_15	G2	25	5	50	0.833333	92.7353	92.7353	80.691	1.14926
1	MIA PaCa2	D14_4	0.01	1_D14_4_15	G2	26	6	60	1	89.8678	89.8678	79.6097	1.12886
1	MIA PaCa2	D14_4	0.01	1_D14_4_15	G2	27	7	70	1.16667	88.5363	88.5363	79.1117	1.11913
1	MIA PaCa2	D14_4	0.01	1_D14_4_15	G2	28	8	80	1.33333	89.5642	89.5642	78.0016	1.14824
1	MIA PaCa2	D14_4	0.01	1_D14_4_15	G2	29	9	90	1.5	92.6873	92.6873	77.8528	1.19055
1	MIA PaCa2	D14_4	0.01	1_D14_4_15	G2	30	10	100	1.66667	92.4372	92.4372	77.6698	1.19013
1	MIA PaCa2	D14_4	0.01	1_D14_4_15	G2	31	11	110	1.83333	93.8958	93.8958	77.1169	1.21758
1	MIA PaCa2	D14_4	0.01	1_D14_4_15	G2	32	12	120	2	88.5876	88.5876	76.7701	1.15393
1	MIA PaCa2	D14_4	0.01	1_D14_4_15	G2	33	13	130	2.16667	89.6244	89.6244	75.9843	1.17951
1	MIA PaCa2	D14_4	0.01	1_D14_4_15	G2	34	14	140	2.33333	96.3134	96.3134	75.0842	1.28274
1	MIA PaCa2	D14_4	0.01	1_D14_4_15	G2	35	15	150	2.5	90.2965	90.2965	75.707	1.19271
1	MIA PaCa2	D14_4	0.01	1_D14_4_15	G2	36	16	160	2.66667	92.1385	92.1385	74.2775	1.24046
1	MIA PaCa2	D14_4	0.01	1_D14_4_61	S	0	-20	-200	-3.33333	105.743	105.743	102.696	1.02967
1	MIA PaCa2	D14_4	0.01	1_D14_4_61	S	1	-19	-190	-3.16667	99.0897	99.0897	98.9025	1.00189
1	MIA PaCa2	D14_4	0.01	1_D14_4_61	S	2	-18	-180	-3	100.659	100.659	98.287	1.02414
1	MIA PaCa2	D14_4	0.01	1_D14_4_61	S	3	-17	-170	-2.83333	100.119	100.119	95.5639	1.04767
1	MIA PaCa2	D14_4	0.01	1_D14_4_61	S	4	-16	-160	-2.66667	96.1573	96.1573	94.8279	1.01402
1	MIA PaCa2	D14_4	0.01	1_D14_4_61	S	5	-15	-150	-2.5	98.4662	98.4662	93.7282	1.05055
1	MIA PaCa2	D14_4	0.01	1_D14_4_61	S	6	-14	-140	-2.33333	93.5777	93.5777	91.2043	1.02602
1	MIA PaCa2	D14_4	0.01	1_D14_4_61	S	7	-13	-130	-2.16667	91.5609	91.5609	91.0398	1.00572
1	MIA PaCa2	D14_4	0.01	1_D14_4_61	S	8	-12	-120	-2	88.648	88.648	89.9628	0.985385
1	MIA PaCa2	D14_4	0.01	1_D14_4_61	S	9	-11	-110	-1.83333	86.022	86.022	88.8498	0.968173
1	MIA PaCa2	D14_4	0.01	1_D14_4_61	S	10	-10	-100	-1.66667	86.8778	86.8778	88.0257	0.98696
1	MIA PaCa2	D14_4	0.01	1_D14_4_61	S	11	-9	-90	-1.5	85.3238	85.3238	87.39	0.976356
1	MIA PaCa2	D14_4	0.01	1_D14_4_61	S	12	-8	-80	-1.33333	86.6376	86.6376	86.2825	1.00412
1	MIA PaCa2	D14_4	0.01	1_D14_4_61	S	13	-7	-70	-1.16667	82.4952	82.4952	84.872	0.971995
1	MIA PaCa2	D14_4	0.01	1_D14_4_61	S	14	-6	-60	-1	81.1667	81.1667	85.6506	0.947649
1	MIA PaCa2	D14_4	0.01	1_D14_4_61	S	15	-5	-50	-0.833333	84.3	84.3	84.1405	1.0019
1	MIA PaCa2	D14_4	0.01	1_D14_4_61	S	16	-4	-40	-0.666667	81.7803	81.7803	82.5286	0.990933
1	MIA PaCa2	D14_4	0.01	1_D14_4_61	S	17	-3	-30	-0.5	84.5192	84.5192	83.098	1.0171
1	MIA PaCa2	D14_4	0.01	1_D14_4_61	S	18	-2	-20	-0.333333	84.4863	84.4863	82.7797	1.02062
1	MIA PaCa2	D14_4	0.01	1_D14_4_61	S	19	-1	-10	-0.166667	84.1558	84.1558	82.0129	1.02613
1	MIA PaCa2	D14_4	0.01	1_D14_4_61	S	20	0	0	0	84.4896	84.4896	81.1847	1.04071
1	MIA PaCa2	D14_4	0.01	1_D14_4_61	S	21	1	10	0.166667	83.3343	83.3343	84.5183	0.985991
1	MIA PaCa2	D14_4	0.01	1_D14_4_61	S	22	2	20	0.333333	84.3631	84.3631	82.9015	1.01763
1	MIA PaCa2	D14_4	0.01	1_D14_4_61	S	23	3	30	0.5	84.4111	84.4111	82.0655	1.02858
1	MIA PaCa2	D14_4	0.01	1_D14_4_61	S	24	4	40	0.666667	84.279	84.279	80.9707	1.04086
1	MIA PaCa2	D14_4	0.01	1_D14_4_61	S	25	5	50	0.833333	89.315	89.315	80.691	1.10688
1	MIA PaCa2	D14_4	0.01	1_D14_4_61	S	26	6	60	1	86.1162	86.1162	79.6097	1.08173
1	MIA PaCa2	D14_4	0.01	1_D14_4_61	S	27	7	70	1.16667	83.6703	83.6703	79.1117	1.05762
1	MIA PaCa2	D14_4	0.01	1_D14_4_61	S	28	8	80	1.33333	83.7358	83.7358	78.0016	1.07351
1	MIA PaCa2	D14_4	0.01	1_D14_4_61	S	29	9	90	1.5	85.5718	85.5718	77.8528	1.09915
1	MIA PaCa2	D14_4	0.01	1_D14_4_61	S	30	10	100	1.66667	83.7035	83.7035	77.6698	1.07768
1	MIA PaCa2	D14_4	0.01	1_D14_4_61	S	31	11	110	1.83333	82.4731	82.4731	77.1169	1.06946
1	MIA PaCa2	D14_4	0.01	1_D14_4_61	S	32	12	120	2	81.4578	81.4578	76.7701	1.06106
1	MIA PaCa2	D14_4	0.01	1_D14_4_61	S	33	13	130	2.16667	81.5676	81.5676	75.9843	1.07348
1	MIA PaCa2	D14_4	0.01	1_D14_4_61	S	34	14	140	2.33333	86.3385	86.3385	75.0842	1.14989
1	MIA PaCa2	D14_4	0.01	1_D14_4_61	S	35	15	150	2.5	82.496	82.496	75.707	1.08967
1	MIA PaCa2	D14_4	0.01	1_D14_4_61	S	36	16	160	2.66667	81.1054	81.1054	74.2775	1.09192
1	MIA PaCa2	D14_4	0.01	1_D14_4_61	S	37	17	170	2.83333	78.8112	78.8112	73.2738	1.07557
1	MIA PaCa2	D14_4	0.01	1_D14_4_61	S	38	18	180	3	79.7699	79.7699	73.1743	1.09014
1	MIA PaCa2	D14_4	0.01	1_D14_4_61	S	39	19	190	3.16667	76.0054	76.0054	72.5019	1.04832
1	MIA PaCa2	D14_4	0.01	1_D14_4_61	S	40	20	200	3.33333	75.7328	75.7328	71.7669	1.05526
1	MIA PaCa2	D14_4	0.01	1_D14_4_61	S	41	21	210	3.5	81.6075	81.6075	72.0161	1.13318
1	MIA PaCa2	D14_4	0.01	1_D14_4_61	S	42	22	220	3.66667	77.4645	77.4645	71.8185	1.07861
1	MIA PaCa2	D14_4	0.01	1_D14_4_61	S	43	23	230	3.83333	78.9328	78.9328	71.1314	1.10968
1	MIA PaCa2	D14_4	0.01	1_D14_4_61	S	44	24	240	4	78.5112	78.5112	70.5922	1.11218
1	MIA PaCa2	D14_4	0.01	1_D14_4_61	S	45	25	250	4.16667	76.3531	76.3531	70.3088	1.08597
1	MIA PaCa2	D14_4	0.01	1_D14_4_61	S	46	26	260	4.33333	74.9119	74.9119	70.5953	1.06115
1	MIA PaCa2	D14_4	0.01	1_D14_4_61	S	47	27	270	4.5	75.2188	75.2188	70.0862	1.07323
1	MIA PaCa2	D14_4	0.01	1_D14_4_61	S	48	28	280	4.66667	77.2383	77.2383	69.4746	1.11175
1	MIA PaCa2	D14_4	0.01	1_D14_4_61	S	49	29	290	4.83333	77.9015	77.9015	68.6304	1.13509
1	MIA PaCa2	D14_4	0.01	1_D14_4_61	S	50	30	300	5	75.6486	75.6486	68.8548	1.09867
1	MIA PaCa2	D14_4	0.01	1_D14_4_61	S	51	31	310	5.16667	73.4677	73.4677	68.1679	1.07775
1	MIA PaCa2	D14_4	0.01	1_D14_4_61	S	52	32	320	5.33333	73.3351	73.3351	67.3507	1.08885
1	MIA PaCa2	D14_4	0.01	1_D14_4_61	S	53	33	330	5.5	76.8282	76.8282	67.9219	1.13112
1	MIA PaCa2	D14_4	0.01	1_D14_4_61	S	54	34	340	5.66667	77.0506	77.0506	68.0349	1.13252
1	MIA PaCa2	D14_4	0.01	1_D14_4_61	S	55	35	350	5.83333	75.8668	75.8668	68.887	1.10132
1	MIA PaCa2	D14_4	0.01	1_D14_4_61	S	56	36	360	6	76.3759	76.3759	68.1633	1.12048
1	MIA PaCa2	D14_4	0.01	1_D14_4_61	S	57	37	370	6.16667	77.6862	77.6862	67.2471	1.15523
1	MIA PaCa2	D14_4	0.01	1_D14_4_61	S	58	38	380	6.33333	77.9225	77.9225	67.1163	1.16101
1	MIA PaCa2	D14_4	0.01	1_D14_4_61	S	59	39	390	6.5	73.7222	73.7222	66.9979	1.10037
1	MIA PaCa2	D14_4	0.01	1_D14_4_61	S	60	40	400	6.66667	76.5304	76.5304	66.8466	1.14487
1	MIA PaCa2	D14_4	0.01	1_D14_4_61	S	61	41	410	6.83333	76.5945	76.5945	66.872	1.14539
1	MIA PaCa2	D14_4	0.01	1_D14_4_61	S	62	42	420	7	77.7911	77.7911	67.4151	1.15391
1	MIA PaCa2	D14_4	0.01	1_D14_4_61	S	63	43	430	7.16667	77.8507	77.8507	66.593	1.16905
1	MIA PaCa2	D14_4	0.01	1_D14_4_61	S	64	44	440	7.33333	74.9588	74.9588	64.9413	1.15425
1	MIA PaCa2	D14_4	0.01	1_D14_4_61	S	65	45	450	7.5	78.5251	78.5251	65.8821	1.1919
1	MIA PaCa2	D14_4	0.01	1_D14_4_61	S	66	46	460	7.66667	81.4853	81.4853	65.7717	1.23891
1	MIA PaCa2	D14_4	0.01	1_D14_4_61	S	67	47	470	7.83333	81.8247	81.8247	65.9693	1.24035
1	MIA PaCa2	D14_4	0.01	1_D14_4_61	S	68	48	480	8	82.8554	82.8554	65.2461	1.26989
1	MIA PaCa2	D14_4	0.01	1_D14_4_61	S	69	49	490	8.16667	78.9068	78.9068	64.9541	1.21481
1	MIA PaCa2	D14_4	0.01	1_D14_4_61	S	70	50	500	8.33333	73.8813	73.8813	64.7238	1.14149
1	MIA PaCa2	D14_4	0.01	1_D14_4_61	S	71	51	510	8.5	79.2269	79.2269	64.8745	1.22123
1	MIA PaCa2	D14_4	0.01	1_D14_4_61	S	72	52	520	8.66667	73.9042	73.9042	65.0075	1.13686
1	MIA PaCa2	D14_4	0.01	1_D14_4_61	S	73	53	530	8.83333	69.6831	69.6831	64.3036	1.08366
1	MIA PaCa2	D14_4	0.01	1_D14_4_61	S	74	54	540	9	71.39	71.39	64.0165	1.11518
1	MIA PaCa2	D14_4	0.01	1_D14_4_61	S	75	55	550	9.16667	68.6056	68.6056	64.712	1.06017
1	MIA PaCa2	D14_4	0.01	1_D14_4_61	S	76	56	560	9.33333	68.4961	68.4961	64.0422	1.06955
1	MIA PaCa2	D14_4	0.01	1_D14_4_61	S	77	57	570	9.5	67.888	67.888	63.8764	1.0628
1	MIA PaCa2	D14_4	0.01	1_D14_4_61	S	78	58	580	9.66667	69.7211	69.7211	63.7423	1.0938
1	MIA PaCa2	D14_4	0.01	1_D14_4_76	G2	0	-20	-200	-3.33333	111.067	111.067	102.696	1.08151
1	MIA PaCa2	D14_4	0.01	1_D14_4_76	G2	1	-19	-190	-3.16667	107.445	107.445	98.9025	1.08637
1	MIA PaCa2	D14_4	0.01	1_D14_4_76	G2	2	-18	-180	-3	105.024	105.024	98.287	1.06854
1	MIA PaCa2	D14_4	0.01	1_D14_4_76	G2	3	-17	-170	-2.83333	102.287	102.287	95.5639	1.07035
1	MIA PaCa2	D14_4	0.01	1_D14_4_76	G2	4	-16	-160	-2.66667	101.633	101.633	94.8279	1.07176
1	MIA PaCa2	D14_4	0.01	1_D14_4_76	G2	5	-15	-150	-2.5	100.779	100.779	93.7282	1.07523
1	MIA PaCa2	D14_4	0.01	1_D14_4_76	G2	6	-14	-140	-2.33333	99.2893	99.2893	91.2043	1.08865
1	MIA PaCa2	D14_4	0.01	1_D14_4_76	G2	7	-13	-130	-2.16667	94.4083	94.4083	91.0398	1.037
[truncated: 50,284 more rows]

## Sheet: Fig1 F
TNF	Cell_line	Comparison_to_60min	Correlation
0.01	MIA PaCa2	180 min	0.57
0.01	PANC1	180 min	0.52
0.1	MIA PaCa2	180 min	0.83
0.1	PANC1	180 min	0.65
10	MIA PaCa2	180 min	0.84
10	PANC1	180 min	0.79
0.01	MIA PaCa2	300 min	0.44
0.01	PANC1	300 min	0.27
0.1	MIA PaCa2	300 min	0.68
0.1	PANC1	300 min	0.48
10	MIA PaCa2	300 min	0.72
10	PANC1	300 min	0.6
0.01	MIA PaCa2	600 min	0.4
0.01	PANC1	600 min	0.31
0.1	MIA PaCa2	600 min	0.73
0.1	PANC1	600 min	0.34
10	MIA PaCa2	600 min	0.67
10	PANC1	600 min	0.34

## Sheet: Fig1Supp1 C,D,E
Bio_rep	TNF	Cell_line	Track_ID	Peak_RELA_amplitude	Time_to_peak_RELA	Stage
1	0.01	MIA PaCa2	1_D13_2_131	1.08446	30	S
1	0.01	MIA PaCa2	1_D13_3_21	1.18803	40	S
1	0.01	MIA PaCa2	1_D13_3_87	1.18915	50	G1
1	0.01	MIA PaCa2	1_D13_4_5	1.13211	30	G2
1	0.01	MIA PaCa2	1_D14_1_16	0.954451	30	S
1	0.01	MIA PaCa2	1_D14_1_9	0.895561	20	S
1	0.01	MIA PaCa2	1_D14_3_5	1.03683	70	G2
1	0.01	MIA PaCa2	1_D14_3_70	1.49905	70	S
1	0.01	MIA PaCa2	1_D14_3_72	1.37432	50	S
1	0.01	MIA PaCa2	1_D14_3_74	0.982537	20	G1
1	0.01	MIA PaCa2	1_D14_3_76	1.08874	50	G1
1	0.01	MIA PaCa2	1_D14_4_100	1.20666	40	S
1	0.01	MIA PaCa2	1_D14_4_102	1.1543	60	S
1	0.01	MIA PaCa2	1_D14_4_106	1.06763	40	G1
1	0.01	MIA PaCa2	1_D14_4_61	1.10688	50	S
1	0.01	MIA PaCa2	1_D14_4_76	1.21883	50	G2
1	0.01	MIA PaCa2	1_D15_1_61	1.07418	40	S
1	0.01	MIA PaCa2	1_D15_2_42	1.13359	40	G1
1	0.01	MIA PaCa2	1_D15_3_11	1.15718	20	S
1	0.01	MIA PaCa2	1_D15_3_91	1.1391	50	S
1	0.01	MIA PaCa2	1_D15_3_95	1.05852	40	S
1	0.01	MIA PaCa2	1_D15_4_35	1.1769	50	G2
1	0.01	MIA PaCa2	1_D16_1_13	1.09231	60	G2
1	0.01	MIA PaCa2	1_D16_1_33	0.874898	20	S
1	0.01	MIA PaCa2	1_D16_1_7	0.929033	20	S
1	0.01	PANC1	1_E13_2_52	1.1272	40	G1
1	0.01	PANC1	1_E13_2_54	1.1012	30	G1
1	0.01	PANC1	1_E14_1_33	1.14515	50	S
1	0.01	PANC1	1_E14_4_22	1.0887	30	G1
1	0.01	PANC1	1_E15_1_11	1.08039	40	S
1	0.01	PANC1	1_E15_1_12	0.939165	40	S
1	0.01	PANC1	1_E15_4_47	1.08296	20	S
1	0.01	PANC1	1_E16_2_11	1.00045	30	G1
1	0.01	PANC1	1_E16_2_5	0.960572	30	S
1	0.01	PANC1	1_E16_2_7	0.878239	20	S
1	0.01	PANC1	1_E17_1_5	1.10186	40	S
1	0.01	PANC1	1_E17_1_6	0.970522	30	S
1	0.01	PANC1	1_E17_2_21	1.01306	20	S
1	0.01	PANC1	1_E17_2_92	1.2189	40	G1
1	0.01	PANC1	1_E17_2_94	1.22229	40	G1
1	0.01	PANC1	1_E17_3_44	1.19525	40	S
1	0.01	PANC1	1_E17_3_49	1.11759	30	S
1	0.01	PANC1	1_E17_4_6	1.12001	40	S
1	0.01	PANC1	1_E17_4_9	1.14875	40	S
1	0.01	PANC1	1_E18_1_6	0.91348	20	S
1	0.01	PANC1	1_E18_3_5	1.15043	40	S
1	0.01	PANC1	1_E19_4_21	0.977464	30	S
1	0.01	PANC1	1_E20_1_5	0.832597	20	S
1	0.01	PANC1	1_E20_1_7	1.03489	40	S
1	0.1	MIA PaCa2	1_G4_2_13	1.26097	50	S
1	0.1	MIA PaCa2	1_G4_2_132	1.30028	30	S
1	0.1	MIA PaCa2	1_G4_2_134	1.29462	50	G1
1	0.1	MIA PaCa2	1_G4_2_67	1.22077	50	G2
1	0.1	MIA PaCa2	1_G4_2_72	1.28967	60	S
1	0.1	MIA PaCa2	1_G4_3_26	1.14192	50	S
1	0.1	MIA PaCa2	1_G4_3_41	1.05789	50	G1
1	0.1	MIA PaCa2	1_G4_3_43	1.06018	40	G1
1	0.1	MIA PaCa2	1_G4_3_45	1.12111	50	S
1	0.1	MIA PaCa2	1_G4_3_47	1.19444	50	S
1	0.1	MIA PaCa2	1_G4_3_8	1.18899	40	S
1	0.1	MIA PaCa2	1_G4_4_11	1.1396	50	S
1	0.1	MIA PaCa2	1_G4_4_124	1.1644	50	G1
1	0.1	MIA PaCa2	1_G5_2_116	1.25499	60	G1
1	0.1	MIA PaCa2	1_G5_2_13	1.14406	40	G1
1	0.1	MIA PaCa2	1_G5_2_14	1.25331	40	S
1	0.1	MIA PaCa2	1_G5_2_19	1.30206	60	G1
1	0.1	MIA PaCa2	1_G5_3_18	1.11133	50	S
1	0.1	MIA PaCa2	1_G5_3_190	1.20084	50	G1
1	0.1	MIA PaCa2	1_G5_3_193	1.32068	50	S
1	0.1	MIA PaCa2	1_G5_3_196	1.20859	40	G1
1	0.1	MIA PaCa2	1_G5_3_40	1.25736	40	S
1	0.1	MIA PaCa2	1_G5_3_49	1.16448	50	S
1	0.1	MIA PaCa2	1_G5_4_18	1.03382	40	S
1	0.1	MIA PaCa2	1_G5_4_22	1.13417	40	S
1	0.1	MIA PaCa2	1_G5_4_32	1.27564	40	G2
1	0.1	MIA PaCa2	1_G5_4_44	1.25335	50	G2
1	0.1	MIA PaCa2	1_G5_4_57	1.19544	40	S
1	0.1	MIA PaCa2	1_G5_4_58	1.20327	50	G2
1	0.1	MIA PaCa2	1_G6_2_10	1.2499	40	S
1	0.1	MIA PaCa2	1_G6_2_147	1.12001	70	G1
1	0.1	MIA PaCa2	1_G6_2_15	1.30491	40	S
1	0.1	MIA PaCa2	1_G6_2_25	1.21069	50	G2
1	0.1	MIA PaCa2	1_G6_2_41	1.18313	40	G2
1	0.1	MIA PaCa2	1_G6_3_111	1.1837	30	S
1	0.1	MIA PaCa2	1_G6_3_220	1.28086	40	S
1	0.1	MIA PaCa2	1_G6_3_26	1.05101	30	S
1	0.1	MIA PaCa2	1_G6_3_46	1.44358	50	S
1	0.1	MIA PaCa2	1_G6_3_66	1.05224	40	S
1	0.1	MIA PaCa2	1_G6_3_9	1.19323	40	S
1	0.1	MIA PaCa2	1_G7_1_17	1.31255	40	G2
1	0.1	MIA PaCa2	1_G7_1_19	1.12003	50	S
1	0.1	MIA PaCa2	1_G7_1_20	1.26033	50	S
1	0.1	MIA PaCa2	1_G7_1_60	1.34823	50	G1
1	0.1	MIA PaCa2	1_G7_1_62	1.31029	60	G1
1	0.1	MIA PaCa2	1_G7_1_64	1.06416	50	S
1	0.1	PANC1	1_H11_1_63	1.07641	40	G1
1	0.1	PANC1	1_H11_1_65	1.17738	50	G1
1	0.1	PANC1	1_H4_2_7	1.04034	40	S
1	0.1	PANC1	1_H4_2_73	1.06037	50	S
1	0.1	PANC1	1_H4_3_5	0.937825	20	G1
1	0.1	PANC1	1_H4_3_6	1.01835	30	S
1	0.1	PANC1	1_H4_3_7	0.996842	30	Unclear
1	0.1	PANC1	1_H4_3_9	0.995546	40	S
1	0.1	PANC1	1_H4_4_11	0.989844	30	G1
1	0.1	PANC1	1_H5_1_5	0.952643	30	S
1	0.1	PANC1	1_H5_1_6	1.17037	60	S
1	0.1	PANC1	1_H5_1_8	1.08071	60	S
1	0.1	PANC1	1_H5_1_9	1.0873	70	G1
1	0.1	PANC1	1_H5_2_14	0.977603	40	S
1	0.1	PANC1	1_H5_2_5	1.02754	40	G1
1	0.1	PANC1	1_H5_2_6	0.864658	30	S
1	0.1	PANC1	1_H5_2_79	1.07376	60	S
1	0.1	PANC1	1_H5_2_8	1.0703	40	G1
1	0.1	PANC1	1_H5_4_12	1.19811	60	S
1	0.1	PANC1	1_H6_1_10	0.932328	40	S
1	0.1	PANC1	1_H6_1_67	1.05665	40	S
1	0.1	PANC1	1_H6_1_7	0.905125	40	S
1	0.1	PANC1	1_H6_2_10	1.05662	60	S
1	0.1	PANC1	1_H6_3_6	1.2989	110	G1
1	0.1	PANC1	1_H6_4_42	1.06602	40	G1
1	0.1	PANC1	1_H6_4_46	1.13952	30	S
1	0.1	PANC1	1_H6_4_50	1.16656	40	G1
1	0.1	PANC1	1_H7_1_10	0.990181	20	S
1	0.1	PANC1	1_H7_1_5	0.915408	20	S
1	0.1	PANC1	1_H7_1_9	1.18315	60	S
1	0.1	PANC1	1_H7_2_28	1.31204	70	S
1	0.1	PANC1	1_H7_2_9	1.28471	50	S
1	0.1	PANC1	1_H7_3_7	0.954499	30	S
1	0.1	PANC1	1_H7_3_8	1.0814	40	S
1	0.1	PANC1	1_H7_3_9	1.06734	40	S
1	0.1	PANC1	1_H7_4_12	1.237	40	G2
1	0.1	PANC1	1_H7_4_38	1.02143	40	G1
1	0.1	PANC1	1_H7_4_40	1.05811	60	G1
1	0.1	PANC1	1_H8_1_10	1.30835	70	S
1	0.1	PANC1	1_H8_1_8	1.03469	80	S
1	0.1	PANC1	1_H8_1_9	1.42255	60	S
1	0.1	PANC1	1_H9_2_59	1.008	30	G1
1	0.1	PANC1	1_H9_2_61	1.0372	70	G1
1	10	MIA PaCa2	1_G13_1_5	1.42368	30	S
1	10	MIA PaCa2	1_G13_1_69	1.23082	30	G2
1	10	MIA PaCa2	1_G13_2_97	1.56513	70	G1
1	10	MIA PaCa2	1_G13_3_23	1.22427	50	G2
1	10	MIA PaCa2	1_G14_2_10	1.52486	60	S
1	10	MIA PaCa2	1_G14_2_21	1.40801	30	S
1	10	MIA PaCa2	1_G14_2_79	1.488	30	S
1	10	MIA PaCa2	1_G15_3_14	1.18223	40	S
1	10	PANC1	1_H13_1_45	1.1014	50	G1
1	10	PANC1	1_H13_1_47	1.11784	30	G1
1	10	PANC1	1_H13_1_6	1.23252	30	S
1	10	PANC1	1_H13_1_9	1.15615	50	S
1	10	PANC1	1_H13_2_5	1.23836	50	S
1	10	PANC1	1_H13_3_7	1.21433	50	S
1	10	PANC1	1_H13_3_9	1.33758	60	S
1	10	PANC1	1_H13_4_37	1.42339	30	S
1	10	PANC1	1_H13_4_7	1.32437	30	S
1	10	PANC1	1_H14_1_5	1.33286	30	S
1	10	PANC1	1_H14_2_17	1.48694	50	S
1	10	PANC1	1_H14_2_5	1.33733	60	S
1	10	PANC1	1_H14_2_6	1.4733	50	S
1	10	PANC1	1_H14_2_69	1.18748	40	G1
1	10	PANC1	1_H14_2_71	1.14775	40	G1
1	10	PANC1	1_H14_2_9	1.47967	40	G1
1	10	PANC1	1_H14_3_12	1.62	120	S
1	10	PANC1	1_H14_3_5	1.33575	50	S
1	10	PANC1	1_H14_3_6	1.28073	50	S
1	10	PANC1	1_H14_3_7	1.31854	70	S
1	10	PANC1	1_H14_4_5	1.2499	40	S
1	10	PANC1	1_H14_4_51	1.28617	20	G1
1	10	PANC1	1_H14_4_53	1.29743	20	G1
1	10	PANC1	1_H15_2_10	1.29892	50	S
1	10	PANC1	1_H15_2_12	1.34305	40	S
1	10	PANC1	1_H15_2_13	1.51123	60	S
1	10	PANC1	1_H15_2_15	1.42174	40	G2
1	10	PANC1	1_H15_2_43	1.10761	40	S
1	10	PANC1	1_H15_2_7	1.2075	50	G1
1	10	PANC1	1_H15_2_8	1.22914	50	S
1	10	PANC1	1_H15_2_92	1.48165	50	G1
1	10	PANC1	1_H15_2_94	1.35136	40	G1
1	10	PANC1	1_H15_3_10	1.37461	50	S
1	10	PANC1	1_H15_3_5	1.37708	40	S
1	10	PANC1	1_H15_3_77	1.18352	20	G1
1	10	PANC1	1_H16_1_28	1.20414	40	G1
1	10	PANC1	1_H16_1_8	1.24121	50	S
1	10	PANC1	1_H16_2_24	1.21249	40	G1
1	10	PANC1	1_H16_2_26	1.19245	50	G1
1	10	PANC1	1_H16_3_11	1.24524	40	G2
1	10	PANC1	1_H16_3_20	1.23765	40	S
1	10	PANC1	1_H16_3_45	1.31556	30	S
1	10	PANC1	1_H16_3_46	1.40063	20	S
1	10	PANC1	1_H16_3_50	1.33466	50	S
1	10	PANC1	1_H16_4_8	1.27275	50	G2
1	10	PANC1	1_H17_3_5	1.41999	50	S
1	10	PANC1	1_H17_4_10	1.75845	50	S
1	10	PANC1	1_H17_4_5	1.23611	60	G2
1	10	PANC1	1_H17_4_7	1.20082	40	G1
2	0.01	MIA PaCa2	2_D13_1_100	0.98431	30	S
2	0.01	MIA PaCa2	2_D13_1_101	1.00496	50	S
2	0.01	MIA PaCa2	2_D13_1_25	0.924912	50	G1
2	0.01	MIA PaCa2	2_D13_2_11	1.17456	40	S
2	0.01	MIA PaCa2	2_D13_2_30	1.35187	50	S
2	0.01	MIA PaCa2	2_D13_3_104	1.07164	60	S
2	0.01	MIA PaCa2	2_D13_3_106	1.07254	60	G2
2	0.01	MIA PaCa2	2_D13_3_325	1.09768	30	S
2	0.01	MIA PaCa2	2_D13_3_34	1.15438	40	S
2	0.01	MIA PaCa2	2_D13_4_23	1.14967	40	S
2	0.01	MIA PaCa2	2_D13_4_315	1.15576	50	S
2	0.01	MIA PaCa2	2_D13_4_52	1.04605	60	S
2	0.01	MIA PaCa2	2_D14_1_204	0.982653	30	S
2	0.01	MIA PaCa2	2_D14_1_217	1.12276	20	S
2	0.01	MIA PaCa2	2_D14_1_22	1.0798	70	G1
2	0.01	MIA PaCa2	2_D14_1_36	0.835709	20	G2
2	0.01	MIA PaCa2	2_D14_1_498	1.18132	40	G2
2	0.01	MIA PaCa2	2_D14_1_61	0.959602	60	S
2	0.01	MIA PaCa2	2_D14_4_118	1.28251	40	S
2	0.01	MIA PaCa2	2_D14_4_122	1.08038	30	G2
2	0.01	MIA PaCa2	2_D14_4_18	1.11468	30	S
2	0.01	MIA PaCa2	2_D14_4_20	1.15074	20	G1
2	0.01	MIA PaCa2	2_D14_4_22	1.01456	30	S
2	0.01	MIA PaCa2	2_D14_4_5	0.992744	20	G2
2	0.01	PANC1	2_E13_3_23	1.08382	20	S
2	0.01	PANC1	2_E13_3_43	1.05515	30	S
2	0.01	PANC1	2_E13_4_11	1.11773	30	G1
2	0.01	PANC1	2_E14_4_115	1.05977	20	G1
2	0.01	PANC1	2_E14_4_29	1.09264	30	G1
2	0.01	PANC1	2_E14_4_5	1.1547	40	S
2	0.01	PANC1	2_E14_4_73	1.11088	40	G1
2	0.1	MIA PaCa2	2_G4_1_14	1.26471	50	S
2	0.1	MIA PaCa2	2_G4_1_21	1.42609	70	S
2	0.1	MIA PaCa2	2_G4_1_249	1.38202	50	S
2	0.1	MIA PaCa2	2_G4_1_29	1.27279	50	G1
2	0.1	MIA PaCa2	2_G4_1_319	1.2641	30	G1
2	0.1	MIA PaCa2	2_G4_1_348	1.46882	100	S
2	0.1	MIA PaCa2	2_G4_1_38	1.29278	40	G1
2	0.1	MIA PaCa2	2_G4_1_441	1.16087	40	S
2	0.1	MIA PaCa2	2_G4_2_11	1.31995	40	S
2	0.1	MIA PaCa2	2_G4_2_155	1.34389	40	G2
2	0.1	MIA PaCa2	2_G4_2_16	1.32442	50	G1
2	0.1	MIA PaCa2	2_G4_2_170	1.29869	30	S
2	0.1	MIA PaCa2	2_G4_2_20	1.3007	40	S
2	0.1	MIA PaCa2	2_G4_2_24	1.17663	50	S
2	0.1	MIA PaCa2	2_G4_2_249	1.35444	50	G1
2	0.1	MIA PaCa2	2_G4_3_181	1.08993	40	S
2	0.1	MIA PaCa2	2_G4_3_322	1.11373	40	S
2	0.1	MIA PaCa2	2_G4_3_70	1.24136	50	G2
2	0.1	MIA PaCa2	2_G4_4_292	1.25293	40	S
2	0.1	MIA PaCa2	2_G4_4_9	1.19779	30	G1
2	0.1	MIA PaCa2	2_G5_1_184	1.21744	40	S
2	0.1	MIA PaCa2	2_G5_1_41	1.08987	40	S
2	0.1	MIA PaCa2	2_G5_2_140	1.12039	40	S
2	0.1	MIA PaCa2	2_G5_2_15	1.12074	50	S
2	0.1	MIA PaCa2	2_G5_2_216	1.12339	40	S
2	0.1	MIA PaCa2	2_G5_3_12	1.18255	50	G2
2	0.1	MIA PaCa2	2_G5_3_150	1.20516	60	G1
2	0.1	MIA PaCa2	2_G5_3_16	1.18858	40	S
2	0.1	MIA PaCa2	2_G5_3_31	1.2481	30	S
2	0.1	MIA PaCa2	2_G5_3_46	1.16679	50	S
2	0.1	MIA PaCa2	2_G5_3_7	1.08605	60	G1
2	0.1	MIA PaCa2	2_G5_4_104	1.16802	40	S
2	0.1	MIA PaCa2	2_G5_4_122	1.19255	20	S
2	0.1	MIA PaCa2	2_G5_4_18	1.1799	40	S
2	0.1	MIA PaCa2	2_G5_4_34	1.23727	50	G1
2	0.1	MIA PaCa2	2_G5_4_404	1.18573	20	G1
2	0.1	MIA PaCa2	2_G6_1_30	1.14403	30	G2
2	0.1	MIA PaCa2	2_G6_1_52	1.09726	30	S
2	0.1	PANC1	2_H4_2_11	1.03982	40	S
2	0.1	PANC1	2_H4_2_14	1.00674	30	G1
2	0.1	PANC1	2_H4_2_6	1.07845	20	S
2	0.1	PANC1	2_H4_2_7	1.04749	30	G1
2	0.1	PANC1	2_H4_2_8	1.1231	30	S
2	0.1	PANC1	2_H4_3_18	1.11324	60	S
2	0.1	PANC1	2_H4_3_23	1.15274	20	S
2	0.1	PANC1	2_H4_3_24	1.04385	40	G2
2	0.1	PANC1	2_H4_4_11	1.03107	40	G1
2	0.1	PANC1	2_H4_4_5	1.06079	30	S
2	0.1	PANC1	2_H5_1_7	0.902003	20	S
2	0.1	PANC1	2_H5_2_15	1.17691	40	S
2	0.1	PANC1	2_H5_2_24	1.28302	30	S
2	0.1	PANC1	2_H6_1_11	0.913176	30	S
2	0.1	PANC1	2_H6_1_136	0.93284	30	G2
2	0.1	PANC1	2_H6_1_38	1.15766	40	S
2	0.1	PANC1	2_H6_1_6	0.848741	20	G1
2	0.1	PANC1	2_H6_1_64	1.08724	30	S
2	0.1	PANC1	2_H6_2_21	1.07049	40	S
2	0.1	PANC1	2_H6_2_29	1.06478	30	S
2	0.1	PANC1	2_H6_2_37	0.950273	20	S
2	0.1	PANC1	2_H6_2_6	1.06257	40	S
2	0.1	PANC1	2_H6_3_141	1.06424	30	S
2	0.1	PANC1	2_H6_3_22	1.19484	30	S
2	0.1	PANC1	2_H6_3_7	1.32018	30	G1
2	0.1	PANC1	2_H6_4_147	1.30418	100	S
2	0.1	PANC1	2_H6_4_37	1.42617	50	G1
2	0.1	PANC1	2_H6_4_5	1.33711	30	S
2	0.1	PANC1	2_H6_4_9	1.27393	60	S
2	0.1	PANC1	2_H7_2_21	1.0948	40	S
2	0.1	PANC1	2_H7_2_6	1.41711	50	S
2	0.1	PANC1	2_H8_1_104	1.0639	30	NA
2	0.1	PANC1	2_H8_1_24	0.910095	20	G2
2	0.1	PANC1	2_H8_1_5	1.10688	30	S
2	0.1	PANC1	2_H8_1_6	1.04319	40	G1
2	10	MIA PaCa2	2_G13_1_40	1.43007	40	G1
2	10	MIA PaCa2	2_G13_3_19	1.37982	40	S
2	10	MIA PaCa2	2_G13_3_231	1.30157	50	S
2	10	MIA PaCa2	2_G13_3_55	1.1321	20	G2
2	10	MIA PaCa2	2_G13_3_6	1.368	50	S
2	10	MIA PaCa2	2_G14_3_348	1.34994	40	G1
2	10	MIA PaCa2	2_G14_4_6	1.26821	30	G2
2	10	MIA PaCa2	2_G15_2_263	1.36366	30	S
2	10	MIA PaCa2	2_G15_2_27	1.46881	80	S
2	10	MIA PaCa2	2_G15_2_329	1.23811	50	G1
2	10	MIA PaCa2	2_G15_2_372	1.38938	50	S
2	10	PANC1	2_H13_1_9	1.04542	30	S
2	10	PANC1	2_H13_2_120	1.47278	110	S
2	10	PANC1	2_H13_2_29	1.38445	30	G2
2	10	PANC1	2_H13_3_10	1.25997	50	S
2	10	PANC1	2_H13_3_143	1.47387	40	S
2	10	PANC1	2_H13_3_23	1.31664	30	S
2	10	PANC1	2_H13_3_30	1.1521	40	S
2	10	PANC1	2_H13_3_42	1.15858	20	S
2	10	PANC1	2_H13_3_43	1.34618	50	S
2	10	PANC1	2_H13_3_56	1.27861	70	G1
2	10	PANC1	2_H13_3_94	1.19997	30	NA
2	10	PANC1	2_H13_4_16	1.56383	30	S
2	10	PANC1	2_H13_4_23	1.34308	90	S
2	10	PANC1	2_H13_4_5	1.18206	60	S
2	10	PANC1	2_H13_4_7	1.27427	60	G1
2	10	PANC1	2_H14_1_104	1.27431	20	S
2	10	PANC1	2_H14_1_15	1.23351	20	S
2	10	PANC1	2_H14_1_17	1.15094	30	S
2	10	PANC1	2_H14_1_25	1.20653	20	S
2	10	PANC1	2_H14_1_38	0.993527	20	S
2	10	PANC1	2_H14_2_110	1.16949	30	S
2	10	PANC1	2_H14_2_122	1.15585	30	S
2	10	PANC1	2_H14_2_32	1.34427	50	S
2	10	PANC1	2_H14_2_35	1.44147	40	S
2	10	PANC1	2_H14_2_37	1.30221	40	S
2	10	PANC1	2_H14_2_75	1.32901	60	S
2	10	PANC1	2_H14_4_117	1.3825	30	S
2	10	PANC1	2_H14_4_25	1.30851	40	S
2	10	PANC1	2_H14_4_31	1.30529	30	G2
2	10	PANC1	2_H14_4_34	1.19778	40	S
2	10	PANC1	2_H14_4_6	1.30715	30	S
2	10	PANC1	2_H14_4_68	1.64994	60	S

## Sheet: Fig1 well and cell frequency
TNF_ngml	Cell line	number_wells_rep1	number_wells_rep2	total_wells	number_cells_rep1	number_cells_rep2	total_cells
0.01	MIA PaCa2	4	2	6	51	52	103
0.1	MIA PaCa2	4	3	7	55	51	106
10	MIA PaCa2	3	3	6	50	72	122
0.01	PANC1	8	3	11	59	48	107
0.1	PANC1	8	5	13	62	56	118
10	PANC1	5	2	7	53	50	103
