# Supplementary material for: Actin networks modulate heterogeneous NF-κB dynamics in response to TNFα
Source: eLife. 2024 Aug 7;13:e86042. doi: 10.7554/eLife.86042 (PMC11524587; doi:10.7554/eLife.86042)
Supplement: Figure 2—source data 1. — Raw data from live microscopy image analysis (cell feature measurements) and downstream Bayesian arc strengths calculated using the Bnlearn package in R. [file elife-86042-fig2-data1.xlsx]

## Sheet: Fig2 A,C,D raw data
Cell_Line	TNF_dose	Rep	Actin_Texture	Actin_Filament_Cell_Area	Cell_Area	Cell_Roundness	Cytoplasm_Actin_Mean	Cytoplasm_Tubulin_Mean	Elongatedness	Membrane_Cytoplasm_Actin	Nucleus_Roundness	Tubulin_Texture	Nuc_RELA_Mean
MIA PaCa2	0	Rep1	1.33056	0	0.921782	0.959258	0.71262	0.877869	1.06631	0.725265	0.899867	0.858555	0.558862
MIA PaCa2	0	Rep1	0.468284	0	1.57301	0.955193	0.379691	0.351295	0.836961	1.0856	0.84602	0.945273	0.822691
MIA PaCa2	0	Rep1	1.12149	0.691105	0.453414	1.25048	0.492694	1.23193	0.699185	0.61379	0.921769	0.797757	0.700142
MIA PaCa2	0	Rep1	1.08192	0	0.37116	1.09478	0.596838	1.27942	0.787321	0.866755	0.908064	0.604702	0.631583
MIA PaCa2	0	Rep1	1.37447	0	0.46565	1.14069	0.626468	0.866206	0.663262	0.888794	0.880332	0.788431	1.13846
MIA PaCa2	0	Rep1	1.66316	0	0.563538	1.09214	0.637194	0.964547	0.872082	1.00752	0.970607	1.09571	0.284123
MIA PaCa2	0	Rep1	0.975057	0	0.652589	1.05894	0.685041	0.683	0.819578	0.830643	1.04213	0.983647	0.665984
MIA PaCa2	0	Rep1	1.25267	0	0.502358	1.03129	0.700707	1.16804	1.03495	0.958489	0.898416	0.907808	1.00248
MIA PaCa2	0	Rep1	0.264981	1.85439	2.42206	0.585729	0.263158	0.122	2.10179	0.953075	0.907628	0.871994	1.37077
MIA PaCa2	0	Rep1	0.160331	0.373118	4.6191	0.574901	0.232622	0.107373	1.7044	0.947923	0.971959	0.89393	0.918803
MIA PaCa2	0	Rep1	1.76865	0	0.466329	1.25362	0.493959	0.673131	0.568632	0.675453	0.92447	0.70359	0.84117
MIA PaCa2	0	Rep1	0.684102	0	0.304542	1.04471	0.971038	0.403342	1.11222	1.11232	0.882282	1.22832	0.610916
MIA PaCa2	0	Rep1	0.73136	0	0.392234	1.11596	0.490035	0.662261	0.942591	1.07055	1.04772	1.20568	0.603446
MIA PaCa2	0	Rep1	0.540193	0	0.43302	1.1364	0.58168	0.52571	0.849902	1.16408	0.961439	0.821934	0.623057
MIA PaCa2	0	Rep1	0.87573	0	0.941496	0.860741	0.289996	0.350905	0.897021	0.790889	1.00543	0.766504	0.897799
MIA PaCa2	0	Rep1	0.591488	0	0.612482	0.941352	0.964924	0.605786	0.901772	1.22868	0.840381	0.943782	0.812855
MIA PaCa2	0	Rep1	0.303113	0	0.278711	1.0705	1.25143	0.81002	0.762348	1.12654	0.908852	0.625102	1.15184
MIA PaCa2	0	Rep1	1.03566	3.59067	0.843608	1.0308	0.836676	0.941709	0.86649	0.837451	0.886537	1.10675	1.09409
MIA PaCa2	0	Rep1	0.582012	0	0.693377	0.916384	0.943307	0.902134	1.18875	0.96119	0.821255	0.786419	0.717049
MIA PaCa2	0	Rep1	0.33465	0	0.286188	1.14319	0.74126	0.553943	0.645933	1.25667	1.01864	0.727426	0.614307
MIA PaCa2	0	Rep1	0.947593	0	0.195098	0.985498	1.02698	1.09708	1.07751	1.23782	0.877965	0.837797	0.975701
MIA PaCa2	0	Rep1	0.735337	0	0.305222	1.13132	1.59076	0.702724	0.798611	1.04412	0.899952	0.641839	1.02251
MIA PaCa2	0	Rep1	0.362486	0	0.313379	0.907746	1.03154	0.702591	1.00173	1.01988	0.874817	0.72208	1.1104
MIA PaCa2	0	Rep1	1.0427	0	0.571016	1.194	0.66169	0.73987	0.747157	1.00579	0.951783	0.774605	0.621024
MIA PaCa2	0	Rep1	1.43436	0	0.481284	0.982152	0.936093	0.958389	1.07968	1.09052	0.996129	1.24048	0.972454
MIA PaCa2	0	Rep1	0.673576	0	0.474486	0.984889	1.16609	1.069	0.839174	1.15471	0.897256	0.522571	0.831472
MIA PaCa2	0	Rep1	1.0042	0	0.55878	1.19323	0.575427	1.20304	0.752928	1.03391	0.928578	0.81443	0.578271
MIA PaCa2	0	Rep1	0.643365	0	0.396312	1.00892	0.896049	0.556493	0.762951	1.19977	0.956981	0.738266	0.969898
MIA PaCa2	0	Rep1	0.605644	0	0.534308	1.00077	0.716415	0.695988	0.878654	0.97871	1.0659	1.24822	0.620118
MIA PaCa2	0	Rep1	1.68954	0	0.453414	1.16788	0.658987	1.43366	0.823485	0.659783	0.983419	1.29976	0.853946
MIA PaCa2	0	Rep1	1.4458	0	0.574415	1.03405	0.843255	0.938893	1.01746	0.970524	0.975329	1.06524	1.04056
MIA PaCa2	0	Rep1	0.563467	0	0.788546	0.887161	0.711195	0.891847	1.03099	1.05638	1.04502	1.11362	0.662067
MIA PaCa2	0	Rep1	0.977303	0	0.727365	1.18868	0.670203	0.799442	0.858522	0.93961	1.00204	1.00024	0.652188
MIA PaCa2	0	Rep1	0.688827	0	0.445256	1.05557	0.858042	1.14789	0.861355	1.17422	1.07685	0.735307	0.779361
MIA PaCa2	0	Rep1	0.852141	0.727365	0.574415	0.951338	0.776418	0.730541	1.05573	1.07397	0.950806	0.886036	0.654318
MIA PaCa2	0	Rep1	1.01655	0	0.664826	1.05987	0.577126	0.811898	0.999047	0.922437	1.04734	1.41975	0.477194
MIA PaCa2	0	Rep1	1.04718	0	0.863321	1.04498	0.837763	0.652684	0.721363	1.11144	0.925409	1.12885	0.886085
MIA PaCa2	0	Rep1	1.27837	0	0.400391	1.19576	0.975278	1.63456	0.755179	0.818243	0.888455	0.899109	1.02613
MIA PaCa2	0	Rep1	0.704073	0	0.220929	1.19534	1.0244	0.707487	0.858415	1.19245	0.958994	0.734006	1.27455
MIA PaCa2	0	Rep1	0.577898	0	0.191017	1.13925	1.12882	0.767699	0.750891	1.17224	1.04287	0.992743	0.905827
MIA PaCa2	0	Rep1	1.07993	0	0.488762	0.888719	0.893634	0.834431	1.83112	1.09476	1.03623	1.17962	0.682331
MIA PaCa2	0	Rep1	0.812984	0	0.496239	1.04779	1.07394	0.69843	0.847817	1.16178	0.961321	0.89537	1.33363
MIA PaCa2	0	Rep1	0.83218	0	0.691337	1.10696	0.644513	0.717076	0.836823	0.795616	0.977234	0.967023	0.995927
MIA PaCa2	0	Rep1	0.818971	0	0.18626	1.01355	1.62596	0.591089	0.813948	1.01439	0.933426	1.27162	0.762338
MIA PaCa2	0	Rep1	0.837671	0	1.00064	0.794085	0.614775	0.948406	1.69674	0.908737	0.947795	1.19423	0.513793
MIA PaCa2	0	Rep1	0.561874	0	0.314737	0.874277	0.913572	0.717806	1.38956	1.07402	0.779904	0.757079	0.603524
MIA PaCa2	0	Rep1	0.538264	0	1.28546	0.980934	0.478958	0.647458	1.03755	0.938792	0.887296	1.09183	0.536156
MIA PaCa2	0	Rep1	1.61329	6.79752	0.330374	1.00555	1.32589	1.77705	1.11311	0.732863	1.0074	1.19489	1.2962
MIA PaCa2	0	Rep1	0.595523	0	0.322217	1.1688	0.567772	0.675719	0.678654	1.02584	1.01426	1.464	0.746816
MIA PaCa2	0	Rep1	0.89349	0	0.429621	1.03303	1.1912	0.88645	0.768734	1.12521	0.87487	0.542355	1.26028
MIA PaCa2	0	Rep1	0.898395	0	0.991119	0.881623	0.490507	0.886386	1.8839	0.817242	0.751349	1.22026	0.405632
MIA PaCa2	0	Rep1	0.893932	0	0.458852	0.976211	0.639328	1.3734	0.813725	1.00838	1.0837	1.0521	0.558989
MIA PaCa2	0	Rep1	0.594597	0	0.49556	0.915534	0.57844	1.59774	1.40625	1.01005	0.962585	1.57614	0.892851
MIA PaCa2	0	Rep1	0.88609	0	0.422823	1.13557	0.737261	0.611623	0.721111	1.09388	1.03073	1.01723	0.888456
MIA PaCa2	0	Rep1	0.847141	0	0.46361	1.04238	0.876425	0.676569	1.03331	0.94152	0.939885	0.966289	0.713523
MIA PaCa2	0	Rep1	0.895482	0	0.539745	0.89751	1.14853	1.66012	1.04679	1.04781	0.884027	1.00504	1.70851
MIA PaCa2	0	Rep1	0.5852	0	1.13523	0.93001	0.311063	0.347439	0.961631	0.842234	0.799259	0.647435	1.43209
MIA PaCa2	0	Rep1	1.2164	7.7319	0.425543	1.15553	0.761168	1.11434	0.923111	0.967252	0.997341	1.09592	0.664342
MIA PaCa2	0	Rep1	1.18549	0	0.458172	1.10121	1.01619	1.82682	0.965618	0.809513	1.02133	0.975582	1.17596
MIA PaCa2	0	Rep1	0.737279	1.06139	0.639674	0.966447	0.862275	1.27481	1.026	0.770802	1.02755	1.08417	0.888156
MIA PaCa2	0	Rep1	1.12541	1.55503	1.07473	0.906276	0.951943	0.769856	0.870768	0.868191	0.786501	1.16336	0.990832
MIA PaCa2	0	Rep1	1.14559	0	0.447296	0.99576	0.591407	0.571089	0.968937	1.01608	1.03771	1.18572	0.897984
MIA PaCa2	0	Rep1	1.86229	2.36914	0.617241	1.06795	0.676099	1.81012	1.07013	0.725355	1.00691	1.46865	1.21098
MIA PaCa2	0	Rep1	0.601036	0	0.785826	0.892551	0.696537	0.661221	1.13747	1.04848	0.987759	0.956753	0.737119
MIA PaCa2	0	Rep1	1.45112	0	0.562859	1.22797	0.554404	1.10652	0.656854	0.804505	0.883436	1.10116	0.555168
MIA PaCa2	0	Rep1	1.61006	0	0.496239	1.1547	0.714983	2.33725	0.931293	0.889357	0.947846	0.975549	1.31832
MIA PaCa2	0	Rep1	0.5457	0	0.293666	1.18087	0.883071	0.673271	0.760948	1.05436	0.922548	0.787891	0.931432
MIA PaCa2	0	Rep1	1.80927	0	0.344649	1.12618	1.07227	1.14988	0.874048	0.70746	0.977777	0.972389	0.972354
MIA PaCa2	0	Rep1	1.2742	0	0.36912	0.965883	0.869119	1.03454	1.15125	0.829365	0.899509	1.18979	1.1754
MIA PaCa2	0	Rep1	1.65269	1.8625	0.672983	1.1008	0.780231	0.927775	0.779249	0.63158	0.999789	1.13302	1.18363
MIA PaCa2	0	Rep1	1.03875	0	0.768831	1.11001	0.790466	0.686653	0.839341	0.884763	0.984521	1.13524	1.15073
MIA PaCa2	0	Rep1	0.655284	0	0.619959	0.804283	0.716618	0.623749	1.38044	0.759624	0.852505	0.821371	0.725767
MIA PaCa2	0	Rep1	1.03649	0	0.488082	1.12916	1.05331	0.928765	0.827346	0.991448	1.0024	0.958473	1.24801
MIA PaCa2	0	Rep1	1.14547	0	0.346008	0.992182	0.893631	0.839873	1.17928	1.0841	0.793421	0.66132	0.739523
MIA PaCa2	0	Rep1	0.466409	0.468463	0.668904	1.00242	0.353852	0.178407	0.962624	0.926893	0.906447	0.773046	0.742022
MIA PaCa2	0	Rep1	0.485987	0	1.07745	0.954116	0.354926	0.390862	0.884001	0.767977	0.91305	0.912156	1.22704
MIA PaCa2	0	Rep1	0.654346	0	0.537707	1.06203	0.586761	0.798877	0.901924	0.88189	0.922548	0.732789	0.756051
MIA PaCa2	0	Rep1	0.543892	0	1.10804	0.97014	0.538661	0.192615	0.799831	0.748508	0.929012	0.865904	0.786672
MIA PaCa2	0	Rep1	0.687923	0	1.05706	1.0165	0.530381	0.603273	1.05834	0.693772	0.815139	0.877151	0.960417
MIA PaCa2	0	Rep1	0.787222	0	0.517992	1.26285	0.431593	0.942838	0.713747	0.840484	0.998362	0.982851	1.15826
MIA PaCa2	0	Rep1	0.599524	0	0.912945	0.976884	0.879142	0.530449	1.17664	0.908792	0.859176	0.853905	0.903749
MIA PaCa2	0	Rep1	0.517446	0	0.513914	1.0336	0.288539	0.101542	0.75944	0.867125	0.88649	0.700983	0.835113
MIA PaCa2	0	Rep1	0.593866	0	0.320856	0.960137	0.446068	0.167376	1.09782	1.00533	0.862786	0.981947	0.94644
MIA PaCa2	0	Rep1	0.662071	0	0.730764	1.02698	0.689293	0.543895	0.62393	0.822378	0.846706	0.964129	0.800017
MIA PaCa2	0	Rep1	1.00416	0	1.02715	0.834462	0.811816	0.609589	1.06721	0.742647	0.948274	1.02984	1.08412
MIA PaCa2	0	Rep1	0.358387	1.64099	1.05026	0.834554	0.355989	0.269846	1.44511	0.747534	0.991155	0.824191	0.922212
MIA PaCa2	0	Rep1	1.15169	6.88459	1.04686	0.879663	1.14341	1.2919	0.973359	0.733095	0.925488	0.871246	1.27819
MIA PaCa2	0	Rep1	0.582858	0	0.301143	1.12216	0.968558	1.45991	0.832821	1.02564	1.05536	1.06111	1.14852
MIA PaCa2	0	Rep1	0.998072	0	0.722607	1.00124	0.728773	1.1645	0.987796	0.844641	0.904738	1.25912	0.971122
MIA PaCa2	0	Rep1	0.987119	0	0.574415	0.923187	0.763569	1.17665	0.802587	0.853279	0.918553	1.0321	0.842178
MIA PaCa2	0	Rep1	1.49997	0	0.425543	1.23953	0.697981	1.01327	0.723788	0.922649	1.0796	1.19479	0.899708
MIA PaCa2	0	Rep1	1.49711	0.863235	0.544505	0.969775	0.832687	1.15681	1.14942	0.911572	0.991951	1.29474	0.686467
MIA PaCa2	0	Rep1	0.904058	3.03884	0.670263	1.01344	0.838712	0.894955	0.921571	0.826261	1.01733	1.04604	0.900893
MIA PaCa2	0	Rep1	1.40447	4.86557	0.869439	0.93361	0.455879	1.27755	1.41734	0.730232	0.758807	1.56747	1.0959
MIA PaCa2	0	Rep1	1.22962	0.270204	1.15971	1.2406	0.80844	1.58664	0.601884	0.651595	0.970042	1.07124	1.31095
MIA PaCa2	0	Rep1	0.913838	0	0.445256	1.18695	0.97481	1.70368	0.68478	1.04122	0.984474	1.20047	0.810569
MIA PaCa2	0	Rep1	1.11476	3.60757	1.17262	0.857885	0.778407	1.37468	0.747132	0.72061	0.914003	1.23373	1.87018
MIA PaCa2	0	Rep1	0.875152	0	0.370481	1.15864	1.10121	1.06999	0.749974	1.03171	1.00687	0.827517	1.32401
MIA PaCa2	0	Rep1	0.84949	0	0.604325	0.924707	0.761529	0.787544	0.948451	0.797887	0.890388	1.08866	0.676384
MIA PaCa2	0	Rep1	0.762398	0	0.569657	1.08688	0.800077	1.18505	0.894375	0.948221	1.02257	1.12734	1.31565
MIA PaCa2	0	Rep1	1.42437	5.67052	1.04074	0.864484	1.07845	1.11179	1.17458	0.800728	0.953239	1.20124	1.3878
MIA PaCa2	0	Rep1	1.02337	0	0.851085	0.992617	0.482326	0.674457	1.15024	0.764437	1.01857	0.820227	0.780292
MIA PaCa2	0	Rep1	1.08023	0.328325	0.954411	0.907045	0.77351	0.427095	1.21468	0.644812	0.856185	0.826652	0.688943
MIA PaCa2	0	Rep1	0.407864	1.76343	3.08008	0.780008	0.296512	0.194944	1.15067	0.786114	0.872035	0.815297	1.00912
MIA PaCa2	0	Rep1	0.677623	0	0.560139	0.918182	0.492579	0.257764	0.853226	1.00503	0.936529	0.768575	0.66892
MIA PaCa2	0	Rep1	0.220873	0.254288	4.72379	0.822635	0.316205	0.210948	0.933593	0.911367	0.859164	0.899167	1.27182
MIA PaCa2	0	Rep1	0.492542	0	0.846327	0.843127	0.462417	0.693356	0.888678	0.93451	0.917128	0.936336	1.4262
MIA PaCa2	0	Rep1	0.389017	0	0.8069	0.608467	0.315678	0.148171	1.12872	0.965413	0.963972	0.881632	1.03044
MIA PaCa2	0	Rep1	0.995107	0	0.413987	1.1063	0.412964	0.614366	0.667074	0.693499	1.06062	0.743224	0.582729
MIA PaCa2	0	Rep1	0.961569	0	1.3684	1.10591	0.487532	1.18539	0.893122	0.707566	0.852316	0.895425	0.923266
MIA PaCa2	0	Rep1	1.57611	0	0.568976	1.17737	0.52259	1.51597	0.97122	0.645845	0.986666	1.07515	1.11086
MIA PaCa2	0	Rep1	1.73846	0	0.561498	1.10222	0.66679	2.11723	0.925937	0.747798	1.01474	1.47601	0.849574
MIA PaCa2	0	Rep1	0.264444	0	2.75584	0.792492	0.261725	0.192493	0.85045	0.881993	0.961837	0.908807	0.76388
MIA PaCa2	0	Rep1	1.44357	0	0.49284	1.13568	0.704347	0.652361	0.725014	0.855348	0.906906	1.40567	1.02607
MIA PaCa2	0	Rep1	2.03279	0	0.412626	1.15026	0.493504	2.07243	1.01893	0.834636	1.04366	1.59456	1.16438
MIA PaCa2	0	Rep1	1.8878	0	0.404469	1.16899	0.364681	1.76079	0.956575	0.835566	1.08828	1.30334	1.35046
MIA PaCa2	0	Rep1	2.13698	0	0.378638	1.14007	0.560641	2.83141	0.867034	0.937598	0.832202	1.6909	0.836706
MIA PaCa2	0	Rep1	1.33483	0.844263	0.68046	0.897924	0.578527	0.856096	1.59687	0.957618	0.934768	1.08993	0.834682
MIA PaCa2	0	Rep1	2.19078	0	0.486723	0.988881	0.7732	2.24387	1.1174	0.833533	1.03537	1.3055	1.15219
MIA PaCa2	0	Rep1	1.23819	0	0.571695	1.12683	0.502696	0.854714	0.817248	0.791946	0.882848	0.988737	1.14481
MIA PaCa2	0	Rep1	1.11373	2.18523	0.908187	1.23478	0.608769	1.28202	0.719858	0.607564	0.938387	0.946476	1.45972
MIA PaCa2	0	Rep1	1.07026	0	0.449334	1.03544	0.536532	1.48455	0.969557	0.798641	0.969244	1.17237	1.06149
MIA PaCa2	0	Rep1	0.594295	0	0.250839	1.17296	1.28614	2.34554	0.718984	1.15661	0.997339	0.799752	1.34035
MIA PaCa2	0	Rep1	1.14432	0	0.490802	1.02878	0.770023	1.90546	0.97032	0.984393	1.06102	1.37718	1.97393
MIA PaCa2	0	Rep1	1.6947	0	0.607044	1.11614	0.998095	1.38468	0.809581	0.832303	1.03584	0.947136	1.31526
MIA PaCa2	0	Rep1	0.724577	0	0.58937	0.937773	0.678284	0.990531	1.38658	1.21636	0.980199	1.2623	1.2727
MIA PaCa2	0	Rep1	0.526388	0.654783	1.67498	0.879837	0.359002	0.277981	1.05821	0.779649	0.929814	0.859672	0.818743
MIA PaCa2	0	Rep1	1.01923	0	0.325614	0.968949	1.27624	1.44032	0.900043	1.08772	1.00133	0.732147	1.6394
MIA PaCa2	0	Rep1	0.260004	0	1.69266	0.690294	0.233148	0.12457	1.2909	0.975553	0.936529	0.851724	1.12245
MIA PaCa2	0	Rep1	0.705367	1.79226	0.874197	1.08088	0.684146	0.915732	0.887423	0.805331	0.848064	0.948165	1.04093
MIA PaCa2	0	Rep1	0.265319	0	1.47172	0.637916	0.293066	0.208581	1.88352	0.964917	0.879275	0.96429	1.22532
MIA PaCa2	0	Rep1	0.542122	0	0.269193	1.18058	1.19219	1.13378	0.889794	1.1297	1.02715	0.699921	1.29197
MIA PaCa2	0	Rep1	0.713049	0	0.390873	0.987675	0.739893	0.587832	0.886033	1.05266	0.987957	0.776729	1.28385
MIA PaCa2	0	Rep1	0.87954	1.5235	0.479925	1.13205	0.792329	1.64453	0.684049	0.673946	0.906592	0.859501	0.71649
MIA PaCa2	0	Rep1	0.972017	0	1.36772	1.13802	0.837402	0.844338	0.952904	0.627924	0.940096	0.798646	0.931232
MIA PaCa2	0	Rep1	0.555475	0	0.299783	1.15623	0.779006	0.804909	0.711578	1.0461	0.999466	1.14199	1.12803
MIA PaCa2	0	Rep1	0.975074	0	0.65327	1.10445	0.612378	1.02514	0.919664	0.621335	0.973807	0.753885	0.804427
MIA PaCa2	0	Rep1	1.34565	0	0.394953	1.25862	0.502865	0.789358	0.630727	0.890499	0.922471	0.698273	0.768584
MIA PaCa2	0	Rep1	0.276336	0	0.906147	0.783177	0.319731	0.156339	1.55554	0.993395	0.841606	0.953041	0.825431
MIA PaCa2	0	Rep1	1.58783	0.61299	0.511194	1.23684	0.451926	0.641129	0.657089	0.498626	0.967248	0.698597	1.12094
MIA PaCa2	0	Rep1	1.81542	0	0.461571	1.18026	0.568365	0.625439	0.851057	0.930817	1.04985	1.05584	1.0691
MIA PaCa2	0	Rep1	0.998525	0	0.599567	1.14578	0.46018	0.662578	0.679149	1.0041	0.953861	1.09986	0.881691
MIA PaCa2	0	Rep1	0.662291	0	0.52751	1.02652	0.623853	0.919949	0.9044	1.09637	0.943057	1.12494	1.02464
MIA PaCa2	0	Rep1	1.39923	4.89563	0.938777	1.13695	0.691876	0.726126	0.944044	0.833168	0.947175	0.916026	1.0514
MIA PaCa2	0	Rep1	1.17339	0	0.921102	1.03159	0.76375	1.35744	0.802768	0.688732	0.947082	1.22314	1.05626
MIA PaCa2	0	Rep1	2.39002	0	0.300464	1.23893	0.861936	2.09469	0.56366	0.823443	1.05373	1.8429	0.976163
MIA PaCa2	0	Rep1	1.25929	0	0.377279	1.12142	1.03461	0.848416	0.637121	0.912623	1.02107	0.913833	0.948326
MIA PaCa2	0	Rep1	0.796723	0	0.273951	0.978531	0.746342	1.16721	1.4586	0.962784	1.01475	1.098	0.593552
MIA PaCa2	0	Rep1	1.12703	0	0.512555	1.05594	0.816917	0.767002	0.911547	1.08722	1.07129	1.19783	0.883246
MIA PaCa2	0	Rep1	1.15983	0	0.325614	0.716119	0.687527	0.754235	1.55777	1.05694	0.964279	1.09893	1.04834
MIA PaCa2	0	Rep1	0.792913	0	0.664146	1.0486	0.692347	0.505347	1.20246	0.734582	0.829002	1.14767	0.579262
MIA PaCa2	0	Rep1	1.46807	0	0.437778	1.22498	0.631082	0.865013	0.620521	0.771091	0.956244	1.00446	0.449735
MIA PaCa2	0	Rep1	0.987848	0	0.584612	1.0563	0.812126	0.584932	1.02189	1.14472	1.03088	1.14488	0.826539
MIA PaCa2	0	Rep1	1.15257	0	0.74028	0.904979	0.686955	1.11404	1.4073	0.889122	1.01456	0.908212	1.19305
MIA PaCa2	0	Rep1	1.40369	6.40232	0.660747	0.966838	1.00508	0.941633	0.925037	0.655776	1.05093	1.11974	1.26848
MIA PaCa2	0	Rep1	1.23783	0	0.323576	0.834042	0.807809	0.629283	1.06683	0.888599	0.820242	1.07334	0.744796
MIA PaCa2	0	Rep1	1.69761	0	0.442538	1.16674	1.14533	0.913677	0.776863	0.98572	1.02937	1.05291	1.18383
MIA PaCa2	0	Rep1	1.40578	0	0.398351	1.12635	0.855935	0.761922	0.611905	0.887525	0.884322	1.41188	1.14434
MIA PaCa2	0	Rep1	0.741496	0	0.37184	1.11168	0.836312	1.39439	0.765419	1.05362	0.965236	1.13986	1.69249
MIA PaCa2	0	Rep1	1.01507	0	0.627437	0.757319	0.634885	0.608948	1.25395	0.975209	0.938932	1.35944	0.686052
MIA PaCa2	0	Rep1	1.27027	0	0.231126	1.11591	0.55681	0.384481	0.801036	0.860361	0.938482	0.765941	0.793645
MIA PaCa2	0	Rep1	0.973106	0	0.271233	1.0033	0.625926	0.487855	0.706482	1.0559	0.938583	1.37885	0.640847
MIA PaCa2	0	Rep1	1.11267	0	0.719888	0.989777	0.736358	1.13058	0.796197	0.946151	1.02174	1.23157	0.817019
MIA PaCa2	0	Rep1	1.15152	0.327625	0.956451	1.10979	0.843701	1.25351	0.851469	0.684049	0.844322	1.16636	1.84536
MIA PaCa2	0	Rep1	1.31402	1.69831	0.645791	1.03123	0.82314	1.48579	0.958676	1.05647	0.968964	1.1246	0.726601
MIA PaCa2	0	Rep1	1.71999	0	0.210732	1.13849	0.571809	0.465787	0.869195	1.006	0.872307	1.59506	0.925814
MIA PaCa2	0	Rep1	1.21158	0	0.732803	1.13392	0.672989	1.38489	0.586431	0.704568	0.888165	0.946509	0.985006
MIA PaCa2	0	Rep1	0.244953	0	0.18354	1.08848	0.185322	0.0827366	0.826007	1.07595	1.02755	0.802843	0.0445361
MIA PaCa2	0	Rep1	1.36291	0	0.37388	1.23739	0.634543	0.826726	0.640651	0.999676	1.03482	1.15704	0.848058
MIA PaCa2	0	Rep1	1.53862	0	0.655988	1.05147	0.543878	0.866815	1.28185	0.777365	0.95258	1.14856	0.76601
MIA PaCa2	0	Rep1	1.45304	0	0.666185	1.09422	0.786396	1.70719	0.812582	0.656096	1.04946	1.16964	1.20007
MIA PaCa2	0	Rep1	0.589733	0	0.469728	0.905102	0.543937	1.00143	1.21542	1.07005	0.934674	1.39398	0.622507
MIA PaCa2	0	Rep1	1.03302	0.895664	0.52479	0.938297	0.562959	0.766615	1.47129	1.12831	0.998695	1.49258	1.21055
MIA PaCa2	0	Rep1	0.997802	0	1.14203	0.828149	0.667082	0.90476	1.21648	0.843308	0.930768	1.13821	0.760467
MIA PaCa2	0	Rep1	1.62145	0	0.52479	1.14998	0.603686	1.14194	0.809747	0.853748	0.97166	0.975725	0.931078
MIA PaCa2	0	Rep1	1.05195	0	0.577134	1.07133	0.78553	1.26148	0.98923	0.973413	1.00122	1.21865	1.45197
MIA PaCa2	0	Rep1	1.12401	0	1.13115	0.947678	0.651629	0.773008	1.35747	0.705964	0.669797	1.25535	1.17498
MIA PaCa2	0	Rep1	0.69745	0	1.24944	0.958078	0.631958	1.29634	1.1243	0.897725	0.92497	1.14278	0.789851
MIA PaCa2	0	Rep1	1.2179	0	0.817097	1.10736	0.589809	0.640939	1.1812	0.852496	0.748526	1.06371	0.487128
MIA PaCa2	0	Rep1	1.60471	0	0.847686	0.890726	0.601959	0.84123	2.15181	0.934254	0.812705	1.23177	0.374151
MIA PaCa2	0	Rep1	0.725344	0	0.955091	0.935241	0.69516	1.1007	0.958603	0.85705	0.947056	1.06867	0.696318
MIA PaCa2	0	Rep1	0.473279	0	0.295704	1.14672	1.14778	0.35937	0.709957	0.936181	0.923939	0.855879	0.886555
MIA PaCa2	0	Rep1	1.00329	0	0.602966	1.08762	0.919363	0.713157	0.953861	0.865758	0.914154	0.528727	0.75792
MIA PaCa2	0	Rep1	0.7035	0	0.3093	0.938432	1.22599	0.580086	1.15525	1.00317	0.997611	0.760361	0.63617
MIA PaCa2	0	Rep1	0.68926	0	0.830012	0.915179	0.531098	0.815811	1.12207	0.824974	0.879788	0.769989	0.564734
MIA PaCa2	0	Rep1	0.0485363	0	0.293666	0.89566	0.226511	0.102394	0.830997	1.10405	1.00969	0.911286	0.0548963
MIA PaCa2	0	Rep1	0.55558	0.372274	1.12232	0.829973	0.412932	0.215427	1.4023	0.750017	0.865238	0.879602	0.523546
MIA PaCa2	0	Rep1	0.411331	0	0.413307	0.864092	0.741655	0.374375	1.46725	0.810171	0.80504	0.72607	0.739268
MIA PaCa2	0	Rep1	0.717001	0	0.685218	0.909809	0.501504	0.347504	0.821264	0.982074	1.0204	0.802009	0.703431
MIA PaCa2	0	Rep1	0.795316	0	0.298424	1.1724	0.699949	0.609424	0.646832	1.10405	0.979271	1.14588	0.958177
MIA PaCa2	0	Rep1	0.286026	0	1.58797	0.960544	0.296935	0.138227	0.822157	0.9424	0.885124	0.924288	1.0845
MIA PaCa2	0	Rep1	0.98077	0	0.443897	1.10865	1.45808	0.677539	1.02841	1.02878	0.987431	0.919571	1.02058
MIA PaCa2	0	Rep1	0.820486	0	0.581892	0.903563	0.6195	0.964807	0.982593	1.11125	0.83066	0.920583	0.743954
MIA PaCa2	0	Rep1	0.634158	0	0.709691	1.02856	1.18169	0.906719	0.86124	1.0463	0.885492	0.784035	0.741984
MIA PaCa2	0	Rep1	1.1591	0	0.58665	0.973399	1.33373	0.880177	1.31615	1.03083	1.01257	0.825649	1.01204
MIA PaCa2	0	Rep1	0.395711	1.60879	3.05153	0.70042	0.455495	0.397551	1.04351	0.839398	0.759025	0.885199	0.818974
MIA PaCa2	0	Rep1	0.478742	0	0.770871	0.840486	0.633241	0.50347	1.36352	0.924276	0.914272	0.902746	0.903064
MIA PaCa2	0	Rep1	1.47388	2.14223	0.536346	1.1105	0.935341	0.945457	0.752895	0.561897	0.891125	0.793178	0.682388
MIA PaCa2	0	Rep1	1.21999	0	0.386795	0.878352	0.649734	0.678643	1.69677	1.01099	0.909697	1.18225	0.746033
MIA PaCa2	0	Rep1	0.670299	2.39526	0.872159	0.906217	0.804017	0.36397	0.791599	0.721962	0.79309	0.867122	0.405865
MIA PaCa2	0	Rep1	0.510868	0	1.36024	0.730546	0.315851	0.300849	1.23574	0.874886	0.871842	0.810526	0.739444
MIA PaCa2	0	Rep1	0.987918	3.54885	0.544505	0.990623	0.881039	0.817276	0.987441	0.805193	0.982876	0.907529	0.908882
MIA PaCa2	0	Rep1	1.33082	0.565605	0.554021	1.17302	0.792617	1.53539	0.742609	0.46679	0.768618	0.784725	1.07265
MIA PaCa2	0	Rep1	0.686752	0	0.409908	0.991448	0.85171	0.634393	1.01744	1.05359	0.774046	0.827778	0.582707
MIA PaCa2	0	Rep1	0.858945	3.12576	0.952373	1.00986	0.937426	0.927858	0.832333	0.820418	0.975522	0.915114	0.703182
MIA PaCa2	0	Rep1	1.52592	0	0.441177	1.11909	0.597707	0.978582	0.664284	0.756524	0.979862	0.983109	1.13482
MIA PaCa2	0	Rep1	1.07665	0	0.840209	0.952598	0.796584	0.628591	1.43043	1.10649	0.88353	1.12513	0.409566
MIA PaCa2	0	Rep1	0.71911	0	0.46361	1.10899	0.673002	0.550852	0.818137	1.00661	0.962874	0.885254	0.634445
MIA PaCa2	0	Rep1	0.795294	0	0.503037	0.954341	0.692637	0.739832	1.30692	0.962476	0.980826	0.965328	0.660893
MIA PaCa2	0	Rep1	0.643836	0	0.689978	1.15261	0.504748	0.752212	0.878905	0.784396	1.00336	0.923538	0.57934
MIA PaCa2	0	Rep1	0.581489	0	1.26643	0.870644	0.692375	0.866897	1.11456	0.797973	0.88785	1.07477	0.571826
MIA PaCa2	0	Rep1	0.39922	0	0.479246	1.05068	0.584411	0.540287	0.877882	1.09701	0.963114	1.06231	0.884823
MIA PaCa2	0	Rep1	0.529521	0	0.717848	1.00663	0.573868	0.705527	0.887177	0.989457	0.963833	1.10182	0.67253
MIA PaCa2	0	Rep1	2.30347	0	0.314058	1.16969	0.712792	1.586	0.829976	0.810231	1.0282	1.03776	1.03035
MIA PaCa2	0	Rep1	0.830885	0	0.583931	1.09078	0.671428	0.970997	0.828595	1.02719	1.06742	1.33672	0.957069
MIA PaCa2	0	Rep1	0.505014	0	0.454094	1.05494	0.658204	0.586031	0.896719	0.976135	0.925611	1.11461	0.610289
MIA PaCa2	0	Rep1	1.22411	0	0.576453	0.872842	0.879618	0.682759	1.01679	0.845431	1.00202	1.01211	0.778529
MIA PaCa2	0	Rep1	1.53029	0	0.552662	1.06746	0.762825	1.1619	1.04119	0.889438	0.972289	0.644453	1.45535
MIA PaCa2	0	Rep1	0.605751	0	0.787185	0.972064	0.817995	0.668444	0.826215	1.05655	0.953239	1.0724	0.786503
MIA PaCa2	0	Rep1	0.84228	0	0.679101	0.921266	0.625401	0.812056	1.04776	0.821271	0.925831	1.27501	0.518162
MIA PaCa2	0	Rep1	1.3686	1.1415	1.0523	0.829979	0.805013	0.859134	1.6844	0.9163	1.03928	1.03412	0.64639
MIA PaCa2	0	Rep1	1.16549	0	0.37388	1.06926	0.734499	0.478111	1.28809	1.13305	1.00784	0.811704	0.636094
MIA PaCa2	0	Rep1	0.715324	0	0.334452	0.958386	0.485401	0.896401	1.29586	0.8807	0.92391	0.957971	0.939444
MIA PaCa2	0	Rep1	1.16652	0	0.544505	0.990623	0.458857	0.255462	1.06093	0.920579	0.852171	0.525607	0.720149
MIA PaCa2	0	Rep1	0.495243	0	0.730764	0.839873	0.534586	0.675047	1.83939	1.01239	0.907376	1.42455	0.658312
MIA PaCa2	0	Rep1	1.22356	0	0.623358	1.17226	0.594586	0.736991	0.64057	0.776825	0.695521	1.10745	0.673405
MIA PaCa2	0	Rep1	1.04665	0	0.59141	1.00878	0.735005	1.02432	0.780001	0.684434	0.859038	1.11093	0.665466
MIA PaCa2	0	Rep1	0.678737	0	0.388835	1.0511	0.593278	0.639607	0.855893	1.0535	0.993028	1.23482	0.949734
MIA PaCa2	0	Rep1	0.529615	0	0.530229	0.964429	0.773775	0.978893	0.881161	1.02543	0.981158	1.26196	0.642862
MIA PaCa2	0	Rep1	2.11323	0	0.370481	1.26978	0.487754	0.639493	0.630555	0.821372	1.07667	1.06369	1.22765
MIA PaCa2	0	Rep1	0.764213	0	0.719888	0.905162	0.841511	0.553322	0.968041	1.04339	0.951286	0.867575	0.86118
MIA PaCa2	0	Rep1	1.37978	0	0.442538	1.05168	0.75476	0.728695	0.872379	0.930892	0.894048	1.37625	1.0325
MIA PaCa2	0	Rep1	0.768213	0	0.390873	1.08334	0.559196	0.589228	0.857194	1.00252	1.03166	0.988925	0.684135
MIA PaCa2	0	Rep1	0.880043	1.93142	0.730085	1.05608	0.842981	0.808777	0.826376	0.933563	0.814088	0.959881	0.501428
MIA PaCa2	0	Rep1	0.66387	3.33663	0.610443	0.904131	1.03838	0.697593	1.09036	0.94535	0.95702	0.748372	0.836236
MIA PaCa2	0	Rep1	0.717308	0.611828	0.597527	1.09366	0.961062	0.92345	0.637608	1.15062	0.991341	0.968891	0.55807
MIA PaCa2	0	Rep1	0.787053	0	0.531588	0.898149	0.741936	0.846164	1.10738	1.12099	0.850529	0.937144	0.689453
MIA PaCa2	0	Rep1	0.828581	0	0.539745	1.02926	0.630048	0.660802	0.921488	0.898769	1.01179	1.1857	1.28838
MIA PaCa2	0	Rep1	1.11424	0	0.493521	1.00866	1.13579	1.27273	1.24248	0.907136	0.999632	1.17627	0.821583
MIA PaCa2	0	Rep1	0.943789	0.769991	0.610443	0.997022	1.25727	0.722473	1.18638	1.04842	0.886088	0.68399	0.631059
MIA PaCa2	0	Rep1	0.528937	0	0.312699	0.826421	0.932301	0.586173	1.66987	0.992205	1.07705	0.971357	0.791698
MIA PaCa2	0	Rep1	0.986768	0	0.707651	0.84401	0.551095	0.744341	1.84173	1.07484	1.02107	1.16111	0.699867
MIA PaCa2	0	Rep1	0.704403	0	0.269873	0.984586	0.952959	1.00715	1.27808	1.10486	0.986873	0.964719	1.17784
MIA PaCa2	0	Rep1	1.07044	0	0.30726	0.908916	0.837583	0.740866	0.895111	1.04209	0.842728	1.11946	0.914185
MIA PaCa2	0	Rep1	0.935369	0	0.660747	1.06678	0.784135	0.562647	0.906271	0.98377	1.0739	1.30647	0.676422
MIA PaCa2	0	Rep1	1.10581	0	0.551303	1.11567	0.690708	1.28913	0.786142	0.774996	1.03953	1.10165	0.658358
MIA PaCa2	0	Rep1	1.05938	0	0.437099	1.09847	1.15048	0.981969	0.887746	0.938178	0.972105	0.804201	0.649331
MIA PaCa2	0	Rep1	0.77674	0	0.545184	1.16197	0.683028	0.754045	0.664193	1.33189	1.06684	1.1651	0.711331
MIA PaCa2	0	Rep1	1.25708	0	0.3732	1.13024	0.891506	1.2895	0.931769	1.22786	0.949354	1.195	0.88363
MIA PaCa2	0	Rep1	1.16914	0	0.8069	0.788555	0.782428	0.81465	1.63895	1.11807	0.922839	1.40481	0.972654
MIA PaCa2	0	Rep1	0.371706	0	0.372519	0.997122	0.64858	0.27771	1.26253	1.06844	0.967282	0.832229	0.418137
MIA PaCa2	0	Rep1	0.849072	0	0.759315	1.13483	0.627547	0.821608	0.721825	0.933331	1.00087	1.02102	0.705776
MIA PaCa2	0	Rep1	0.995632	0	0.602286	0.879997	0.843775	0.709351	1.4696	1.34079	0.961596	1.12482	0.597352
MIA PaCa2	0	Rep1	1.36349	0	0.46769	1.0479	0.890931	0.52509	1.13576	1.06936	0.972105	1.226	0.684846
MIA PaCa2	0	Rep1	0.601108	0	0.348048	1.09969	1.16909	0.791419	0.693867	0.91964	1.06177	0.883729	1.01768
MIA PaCa2	0	Rep1	1.09265	0	0.578493	1.07283	1.13673	1.00344	0.655176	0.890338	1.00773	1.08921	0.75935
MIA PaCa2	0	Rep1	1.31117	0	0.719888	1.15714	0.684669	2.02837	0.842779	0.883276	0.974954	1.25207	0.972415
MIA PaCa2	0	Rep1	0.976873	0	0.414666	0.906606	1.09983	1.11581	0.963633	1.12665	1.00204	0.802075	1.50589
MIA PaCa2	0	Rep1	1.42095	0	0.460892	0.935083	0.587824	0.867417	1.32861	0.828231	0.905193	1.03173	1.08937
MIA PaCa2	0	Rep1	1.02933	0	0.162467	1.12423	0.584872	0.890921	0.855096	0.693513	0.948899	0.810866	1.15844
MIA PaCa2	0	Rep1	1.20973	0	0.331053	1.00682	0.605293	0.639435	0.961866	1.05343	1.03166	1.15418	0.897822
MIA PaCa2	0	Rep1	0.511073	0	1.44317	0.865686	0.532606	0.218328	1.02551	0.86626	0.840881	0.830052	1.01869
MIA PaCa2	0	Rep1	0.790528	0	1.19913	0.995004	0.778321	1.04156	0.940233	0.716024	0.919704	1.05052	0.460865
MIA PaCa2	0	Rep1	0.417264	0	0.725325	1.08309	0.847649	0.719239	0.65658	1.09387	1.02372	0.801865	0.902887
MIA PaCa2	0	Rep1	0.825964	0	0.630156	0.92185	0.986086	0.840533	1.07771	0.851806	0.942975	0.716105	0.896045
MIA PaCa2	0	Rep1	0.767391	1.66698	1.06522	0.990581	0.941424	0.651879	0.90606	0.962091	0.882788	0.89148	0.90037
MIA PaCa2	0	Rep1	1.946	2.46639	0.423503	1.21843	0.511462	0.974612	0.634118	0.879857	1.04293	1.17055	1.13482
MIA PaCa2	0	Rep1	1.63893	2.61319	0.699494	0.905126	0.539749	1.09661	1.40395	0.876946	1.0022	1.14989	1.60125
MIA PaCa2	0	Rep1	0.600916	0	0.715809	1.14146	0.625001	0.498988	0.776326	1.05991	0.966265	0.982399	0.795923
MIA PaCa2	0	Rep1	0.465859	0	0.639674	0.957187	0.713482	0.826618	1.02908	1.01885	1.07112	0.991349	0.837322
MIA PaCa2	0	Rep1	0.641021	3.01372	1.19573	0.851601	0.535922	0.290364	0.975192	0.692728	0.877811	0.850152	0.391841
MIA PaCa2	0	Rep1	0.790136	0	0.564897	1.1724	0.78118	0.772526	0.706862	1.07514	1.06058	1.09662	0.622054
MIA PaCa2	0	Rep1	0.899561	0	0.613163	1.06374	0.726141	0.628776	0.955922	1.06593	1.11171	0.999422	0.801557
MIA PaCa2	0	Rep1	0.502612	0	1.37995	0.905374	0.335297	0.194705	1.24749	1.03065	0.987957	0.801156	1.16458
MIA PaCa2	0	Rep1	0.717068	0	0.520032	1.09029	0.703729	0.621564	0.826369	0.831809	1.01804	0.861864	1.13545
MIA PaCa2	0	Rep1	0.749498	0	0.426902	1.01629	1.02309	0.82398	1.01522	1.06933	0.799727	0.758617	0.742015
MIA PaCa2	0	Rep1	0.341663	0	0.728045	0.987364	0.724258	0.554934	0.743538	1.25384	0.914508	0.850601	0.534106
MIA PaCa2	0	Rep1	0.860922	2.77041	0.77291	0.815836	0.718509	0.451815	0.758347	0.703982	0.809729	0.889884	0.920603
MIA PaCa2	0	Rep1	0.728639	2.04693	1.14815	0.923493	0.96174	0.884351	0.989837	0.981993	0.860922	1.02968	0.997136
MIA PaCa2	0	Rep1	0.344968	0	1.74092	0.739332	0.391451	0.230628	1.72549	0.79692	0.844722	0.878332	0.841816
MIA PaCa2	0	Rep1	0.776403	0	0.653949	0.916932	0.751142	0.64423	1.24965	1.14445	0.821378	0.680019	0.56268
MIA PaCa2	0	Rep1	0.923222	0	0.98976	0.753388	0.900678	0.781183	1.43979	1.00401	1.00567	1.06997	1.13645
MIA PaCa2	0	Rep1	0.267868	0	2.89382	0.694451	0.256449	0.133081	1.68084	0.889456	0.894316	0.845737	0.478574
MIA PaCa2	0	Rep1	1.05647	0	0.370481	1.09357	0.799927	0.308384	0.959145	0.794586	1.03295	0.975882	0.785464
MIA PaCa2	0	Rep1	0.557312	0	1.21273	0.886851	0.312458	0.24686	1.10257	0.769592	0.974989	0.805437	1.3946
MIA PaCa2	0	Rep1	1.21815	0	1.15767	0.85676	0.762618	0.964357	0.787697	0.830973	0.759736	1.0632	0.983259
MIA PaCa2	0	Rep1	1.0095	0	0.263075	1.10479	0.924264	0.611565	0.840861	1.1357	0.970879	0.731082	0.718787
MIA PaCa2	0	Rep1	0.770597	0	0.547223	1.02644	0.79364	0.645657	1.05102	0.920937	0.828782	0.865685	0.745444
MIA PaCa2	0	Rep1	1.50126	0	0.457493	1.14354	0.619021	0.477488	0.615957	0.926292	0.972221	1.11687	1.34334
MIA PaCa2	0	Rep1	0.36044	0	0.261036	1.02817	0.500243	0.490305	0.954303	1.14834	0.854968	0.629087	0.744754
MIA PaCa2	0	Rep1	0.880985	0	0.83885	0.928549	0.895984	0.794546	1.00679	0.918654	0.851475	0.848326	1.06922
MIA PaCa2	0	Rep1	1.08351	0	0.83409	0.787422	0.606301	0.789726	1.25848	0.981236	0.943765	1.22319	1.04198
MIA PaCa2	0	Rep1	0.558532	2.14447	0.560139	0.833482	0.82156	0.740663	1.24009	0.991099	0.98789	1.08943	0.880483
MIA PaCa2	0	Rep1	0.70952	0	0.826613	0.831009	0.818776	0.852373	1.11987	1.04508	0.880954	0.81571	1.06823
MIA PaCa2	0	Rep1	0.242999	0	1.84221	0.967313	0.225257	0.100507	0.865943	0.911205	0.896261	0.805722	0.855824
MIA PaCa2	0	Rep1	1.54188	0	0.612482	1.14724	0.510237	1.09771	0.836439	0.943895	0.925643	1.27956	0.690593
MIA PaCa2	0	Rep1	0.709414	0	0.540426	1.07743	0.78123	0.723742	0.801442	1.08652	1.05146	1.07638	0.653445
MIA PaCa2	0	Rep1	2.01477	0	0.418065	1.1434	0.497427	0.540098	0.930859	0.929648	1.02935	0.697116	1.14073
MIA PaCa2	0	Rep1	1.05624	1.00868	0.62132	1.03903	0.765857	0.96326	0.903913	0.858624	1.00176	0.886069	1.18964
MIA PaCa2	0	Rep1	0.359301	0	0.387474	1.13946	0.664694	0.625129	0.745443	1.17138	0.975364	0.834871	0.744574
MIA PaCa2	0	Rep1	0.778181	0	0.645791	1.02094	0.708706	0.677469	1.19474	0.916298	1.02755	1.03786	0.444667
MIA PaCa2	0	Rep1	0.810882	0	0.493521	1.08224	1.10146	0.956854	1.01693	1.07142	1.0285	0.676483	0.701989
MIA PaCa2	0	Rep1	0.676946	0	0.511194	1.09206	0.870095	0.640926	0.745288	1.02951	1.01679	0.770629	1.01932
MIA PaCa2	0	Rep1	1.42993	0	0.413307	1.02188	1.12601	0.880171	0.835214	0.950378	1.0532	0.935537	1.23815
MIA PaCa2	0	Rep1	1.45413	0.91152	0.40107	1.21453	0.67258	0.926811	0.784814	0.975555	1.07444	1.01135	0.75381
MIA PaCa2	0	Rep1	0.927947	0.692838	0.67842	0.912439	0.771393	0.590067	1.42265	1.02531	0.987045	1.09325	0.836413
MIA PaCa2	0	Rep1	0.819024	0	0.787185	1.0251	0.870635	0.753531	0.696268	0.74878	0.871847	1.09005	0.824892
MIA PaCa2	0	Rep1	0.326837	0	0.511875	1.01949	1.21232	0.753068	0.67163	1.21028	0.930184	0.764851	0.747469
MIA PaCa2	0	Rep1	1.70442	0	0.318818	1.16139	0.52616	1.77773	0.687657	0.835919	0.947218	1.30954	1.19216
MIA PaCa2	0	Rep1	2.04897	0	0.375918	1.20411	0.597985	1.30404	0.86506	0.76015	1.05797	1.33175	0.776213
MIA PaCa2	0	Rep1	1.57114	0	0.263075	1.14387	0.494081	0.823028	0.653408	0.799494	0.978872	1.63774	0.700963
MIA PaCa2	0	Rep1	1.79186	0	0.15567	1.14647	0.870844	1.22961	0.631765	1.0383	0.988662	1.03369	1.23825
MIA PaCa2	0	Rep1	0.84435	0	0.477885	1.20467	0.568258	0.685226	0.684018	1.20749	0.95494	1.1757	0.964503
MIA PaCa2	0	Rep1	1.17233	0	0.478566	1.01321	0.615359	1.02882	0.900916	1.03001	0.870193	1.02246	0.792621
MIA PaCa2	0	Rep1	0.488202	0	0.426222	1.141	0.755677	1.14061	0.77222	1.11584	1.02696	1.32386	0.738125
MIA PaCa2	0	Rep1	0.857449	3.45671	0.936737	0.816308	0.848515	0.975348	2.13135	1.07223	0.805488	1.02369	0.77532
MIA PaCa2	0	Rep1	0.550996	0	0.321536	1.22586	0.418515	0.744246	0.796651	0.983367	0.988803	1.33909	0.648401
MIA PaCa2	0	Rep1	0.371605	0	0.305901	0.958776	0.247379	0.148668	0.886192	1.2841	0.981696	0.742293	0.252755
MIA PaCa2	0	Rep1	0.873682	0	0.52479	1.012	0.643558	0.985191	1.22053	0.996358	1.04772	1.23544	0.738433
MIA PaCa2	0	Rep1	1.82336	0	0.450695	1.02475	0.493653	1.08883	0.711531	0.880216	1.02953	1.00878	1.81312
MIA PaCa2	0	Rep1	1.17793	0	0.358925	1.17143	0.612481	1.5895	0.653999	1.02844	0.923939	1.46035	0.732203
MIA PaCa2	0	Rep1	0.833493	0	0.297744	1.21115	0.498638	0.870937	0.621809	1.1159	1.04281	1.5202	1.12392
MIA PaCa2	0	Rep1	1.13217	0	0.552662	0.782057	1.29318	0.892196	1.59595	1.06179	0.94291	1.2352	0.93645
MIA PaCa2	0	Rep1	1.19713	0.598882	0.610443	0.967503	1.16753	1.55854	1.13098	0.854234	1.01237	0.845983	0.769709
MIA PaCa2	0	Rep1	1.18935	5.97302	0.699494	1.07063	0.732872	0.680482	0.968869	0.728975	0.827843	1.2413	0.987592
MIA PaCa2	0	Rep1	1.02907	0	0.569657	1.13748	0.922972	0.879645	0.756855	1.09678	1.03604	0.870224	0.937666
MIA PaCa2	0	Rep1	1.16342	0	0.730085	0.92896	1.02974	0.997932	0.951432	1.0407	0.911301	1.14083	1.1416
MIA PaCa2	0	Rep1	1.02145	1.46339	0.499638	1.13082	0.735054	0.746168	0.721919	0.917835	1.01723	0.839677	1.17041
MIA PaCa2	0	Rep1	0.975118	0	1.12572	0.826179	1.06664	1.61548	1.63913	0.733501	0.893399	1.25427	0.917248
MIA PaCa2	0	Rep1	0.655258	0	0.670263	0.829984	1.04619	1.39918	1.16374	0.897529	0.902989	0.961535	1.22095
MIA PaCa2	0	Rep1	0.577465	0	0.248799	1.03179	0.886943	0.558237	0.979716	1.0216	0.937252	0.960235	1.3067
MIA PaCa2	0	Rep1	1.72929	0	0.545184	1.05881	0.883841	1.70286	0.87353	0.974929	1.01576	1.29442	0.954144
MIA PaCa2	0	Rep1	1.90214	0	0.637634	0.847617	0.504403	1.62131	1.87825	0.83942	1.04366	1.52878	0.621949
MIA PaCa2	0	Rep1	1.17859	2.69007	0.485363	1.05871	1.24626	1.16315	0.92023	1.00879	0.95993	0.900933	0.947856
MIA PaCa2	0	Rep1	0.873329	0	0.490802	0.919917	1.01722	0.69621	0.920943	0.988414	0.806426	0.920438	1.34355
MIA PaCa2	0	Rep1	0.585647	0	0.498959	0.992604	0.582251	0.916658	1.20408	1.07668	1.08523	1.47656	0.916686
MIA PaCa2	0	Rep1	0.772775	0	0.342609	1.04293	1.14292	1.08062	0.837304	1.10628	0.928475	0.578986	0.961102
MIA PaCa2	0	Rep1	1.10075	0	0.528869	1.14133	0.910927	1.06336	0.854654	0.852477	0.979451	1.0914	1.09147
MIA PaCa2	0	Rep1	0.803946	0	0.673662	1.03666	1.17939	1.15389	0.910229	1.00046	1.07585	0.800859	1.14813
MIA PaCa2	0	Rep1	1.11771	0	0.65055	1.13752	0.763173	0.652183	0.790526	0.869631	1.08714	1.03373	0.832211
MIA PaCa2	0	Rep1	0.75733	2.3973	0.914984	0.962636	0.824697	1.04371	0.932558	0.914324	0.78769	1.1291	1.49827
MIA PaCa2	0	Rep1	0.899626	1.17355	0.667544	1.07327	0.805233	0.758002	0.895775	1.06987	0.99374	0.963945	0.555763
MIA PaCa2	0	Rep1	0.470415	0	0.238604	1.20414	0.844378	0.882518	0.742863	1.18067	0.99404	1.06965	0.820536
MIA PaCa2	0	Rep1	0.831303	0	0.55946	1.00695	0.88368	1.05909	0.919239	0.876462	0.9662	0.949721	0.980719
MIA PaCa2	0	Rep1	0.574658	0	0.455453	1.0973	0.893047	1.30581	0.963339	1.02787	1.05075	1.12723	0.863058
MIA PaCa2	0	Rep1	1.40868	0.375819	0.972765	0.910715	0.596276	0.819584	1.77316	0.843745	0.936567	0.752526	0.2579
MIA PaCa2	0	Rep1	1.36145	2.06027	0.785826	1.21768	0.499083	0.743485	0.582722	0.581345	0.966827	0.70925	1.18248
MIA PaCa2	0	Rep1	0.513507	1.24763	1.59069	0.775597	0.275504	0.281008	1.01633	0.727553	1.02293	0.892018	1.43586
MIA PaCa2	0	Rep1	1.5901	2.41549	0.670263	1.12129	0.595911	0.55191	0.824033	0.734676	1.04621	1.00091	0.809107
MIA PaCa2	0	Rep1	1.25062	1.27339	1.10736	0.962807	0.715555	0.783295	0.975401	0.767947	1.01703	0.928657	0.933787
MIA PaCa2	0	Rep1	0.149439	0	2.77418	0.841155	0.242381	0.17495	0.99597	0.996983	0.848123	0.883916	0.813394
MIA PaCa2	0	Rep1	1.28622	0	0.150231	1.07025	2.95103	1.55161	0.699652	0.935655	0.910526	0.22811	1.26923
MIA PaCa2	0	Rep1	0.411609	0	0.797382	1.05188	0.447376	0.233319	0.654851	0.847342	0.978351	0.747149	0.781223
MIA PaCa2	0	Rep1	0.337866	0	0.326295	1.07332	0.859422	0.980257	0.768625	0.951271	0.894137	0.689095	0.785679
MIA PaCa2	0	Rep1	0.689736	3.63157	0.647151	0.945759	1.2795	1.08585	1.09556	1.003	0.942665	0.865016	0.763976
MIA PaCa2	0	Rep1	0.623916	0	0.590729	1.0294	1.12453	0.844192	0.977911	1.0168	0.959615	0.846037	0.807275
MIA PaCa2	0	Rep1	0.995679	0	0.268514	1.08143	0.707594	0.409092	0.823831	1.17337	0.972456	0.858852	1.04441
MIA PaCa2	0	Rep1	1.45057	0	0.251519	0.957071	0.660846	2.1861	1.04979	0.880716	1.02817	1.18603	0.775528
MIA PaCa2	0	Rep1	0.275495	0	0.901389	0.876198	0.337391	0.174597	1.16327	0.906714	1.05799	0.95326	1.10167
MIA PaCa2	0	Rep1	2.14951	0	0.362324	1.16045	0.602833	1.20099	0.699972	0.850317	0.991438	1.35846	1.0464
MIA PaCa2	0	Rep1	1.19569	0	0.743	1.17868	0.964106	1.30109	0.611758	0.715677	1.04088	0.982185	1.09135
MIA PaCa2	0	Rep1	0.510816	0	0.411267	0.957385	1.39407	1.01833	0.900337	1.18148	0.975324	0.807127	0.793945
MIA PaCa2	0	Rep1	0.984454	0	0.639674	1.02538	0.968169	1.17778	1.06476	0.69893	1.05955	1.15248	0.862981
MIA PaCa2	0	Rep1	0.874476	9.70823	1.05978	1.11083	1.17746	0.911413	0.940224	0.721965	0.755832	0.813072	1.04974
MIA PaCa2	0	Rep1	1.61042	0	0.516633	1.18245	0.690765	1.84763	0.639263	0.86547	1.02107	1.23447	1.00048
MIA PaCa2	0	Rep1	0.989756	4.27501	0.855164	1.11636	0.879094	1.22764	0.707155	0.828657	0.953239	1.10357	0.709095
MIA PaCa2	0	Rep1	1.019	0	0.564218	1.14429	0.75427	0.705191	0.911486	0.971268	0.998646	0.939757	0.867453
MIA PaCa2	0	Rep1	1.31897	0	0.469728	1.13199	0.972833	0.810693	0.764288	1.36588	0.91477	1.06783	0.835259
MIA PaCa2	0	Rep1	1.06975	0	0.609083	1.00586	0.908201	1.6729	0.867016	0.678449	0.996945	1.14607	1.01541
MIA PaCa2	0	Rep1	1.04803	1.88577	0.747758	0.942487	0.895928	0.681757	1.01788	0.760169	0.969588	1.03397	1.21116
MIA PaCa2	0	Rep1	0.835708	0	0.488762	0.937682	0.95934	1.11181	1.15598	1.01598	0.988587	1.26189	1.34513
MIA PaCa2	0	Rep1	1.11995	0	0.356885	1.10027	0.656346	0.918865	0.836974	1.18501	1.07647	1.42775	0.775928
MIA PaCa2	0	Rep1	1.46867	6.10663	0.632876	1.06145	0.707904	1.34484	0.912787	0.637813	0.999768	1.11101	0.841839
MIA PaCa2	0	Rep1	0.428877	1.03622	0.352806	1.09267	0.684558	0.671952	0.64617	1.24614	0.94216	0.985883	1.36375
MIA PaCa2	0	Rep1	1.14185	6.17065	0.770192	0.985045	0.788479	1.19408	0.698094	0.660845	0.87394	1.27338	1.18573
MIA PaCa2	0	Rep1	1.30229	0	0.475847	1.20164	0.534563	1.1098	0.843291	0.832785	1.01996	1.2924	0.46495
MIA PaCa2	0	Rep1	1.03668	0.418681	0.748439	0.934832	0.692242	1.09887	0.96161	0.926488	1.00227	1.12489	0.533488
MIA PaCa2	0	Rep1	1.37317	0.637577	0.491481	1.17772	0.539929	1.45326	0.828505	0.788291	0.926102	1.34286	0.444414
MIA PaCa2	0	Rep1	1.16735	0	0.407868	1.15838	1.14757	0.782166	0.625263	1.06376	1.02865	0.916079	0.998313
MIA PaCa2	0	Rep1	1.21087	0	0.515274	1.12386	0.900512	0.806139	0.737202	1.04314	0.943878	1.25617	0.830372
MIA PaCa2	0	Rep1	1.48693	0	0.333093	1.13743	0.774253	1.20371	0.731788	1.0303	1.00143	1.25344	1.13352
MIA PaCa2	0	Rep1	1.42679	0	0.654629	0.884774	0.755949	1.63401	1.31034	0.857431	1.0288	1.36748	0.763575
MIA PaCa2	0	Rep1	1.15783	0	0.444576	0.992072	0.740282	1.46745	0.773299	0.962134	0.89857	0.964537	1.51388
MIA PaCa2	0	Rep1	1.64825	0	0.40583	1.10806	0.885099	1.46602	0.728395	0.681829	0.882307	1.30423	1.37934
MIA PaCa2	0	Rep1	0.669489	0	0.191017	1.16351	1.13387	1.37767	0.74499	1.0597	1.01567	0.841477	0.907196
MIA PaCa2	0	Rep1	0.822545	0	0.379997	1.12626	0.732808	0.662787	0.833527	1.06321	1.02565	1.25579	1.28786
MIA PaCa2	0	Rep1	1.19602	0	0.314058	1.18896	0.589632	0.946193	0.604761	1.10406	1.02197	1.2547	1.36894
MIA PaCa2	0	Rep1	0.996089	1.54687	0.607724	0.901663	0.755691	1.24181	1.25243	0.814272	1.02713	1.23332	1.29676
MIA PaCa2	0	Rep1	0.36227	0	0.438458	1.04582	0.79594	0.851517	0.808512	1.22323	0.985209	1.0758	1.02503
MIA PaCa2	0	Rep1	0.576518	0	0.469728	1.02574	0.62405	0.650242	0.6779	1.15805	0.959615	1.12579	1.06912
MIA PaCa2	0	Rep1	0.959355	0	0.562178	0.893299	0.975556	1.10399	1.28523	0.965726	0.959369	1.40334	1.23581
MIA PaCa2	0	Rep1	2.32313	3.02699	0.362324	1.29405	0.671657	1.24242	0.549089	0.866771	1.0723	1.07024	1.67046
MIA PaCa2	0	Rep1	0.709835	0	0.734843	0.90093	0.913504	0.826815	1.06492	0.88053	1.02135	1.12176	0.878189
MIA PaCa2	0	Rep1	0.543566	0	0.305901	1.09735	1.13257	1.02032	0.863163	1.14342	0.963294	0.746315	0.927415
MIA PaCa2	0	Rep1	0.962338	0	0.536346	1.12367	0.714924	1.41468	0.875313	1.0191	0.956447	1.0755	1.21661
MIA PaCa2	0	Rep1	0.770272	2.35407	0.732123	1.12196	0.838792	0.952262	0.699751	0.777185	0.83593	1.01413	0.794415
MIA PaCa2	0	Rep1	1.15381	0	0.570336	1.08766	0.555306	1.38415	0.759412	0.773298	1.02424	1.403	1.08019
MIA PaCa2	0	Rep1	0.840535	0	0.411947	1.04633	0.611854	1.31561	0.937159	1.23233	1.03721	0.911641	1.16462
MIA PaCa2	0	Rep1	0.58741	3.44996	0.787185	0.90832	0.453327	0.335675	1.4448	0.76455	0.966052	0.919327	1.26979
MIA PaCa2	0	Rep1	0.937334	2.76296	0.585971	1.10525	1.02068	1.2531	0.775698	0.9188	0.986344	0.935572	0.70008
MIA PaCa2	0	Rep1	0.433294	0	0.27735	1.16062	0.560658	0.88924	0.930681	1.20687	1.03143	0.782526	1.31495
MIA PaCa2	0	Rep1	0.832309	0	0.318137	1.05689	1.20842	1.53043	1.07443	0.94223	1.05799	0.813823	1.07582
MIA PaCa2	0	Rep1	0.735255	0	0.4976	0.844816	0.418632	0.178832	0.992741	0.884003	0.9733	0.789904	1.66151
MIA PaCa2	0	Rep1	0.731933	2.26835	0.52955	1.00635	0.788925	0.861436	1.13772	1.08431	0.951327	1.10983	0.869692
MIA PaCa2	0	Rep1	1.6757	6.26104	0.400391	1.17865	1.03156	1.34121	0.693244	1.00236	0.966636	1.02528	1.0644
MIA PaCa2	0	Rep1	1.3073	3.34036	0.750477	1.0241	0.695184	1.07155	1.41559	0.705629	1.00846	1.13964	0.802557
MIA PaCa2	0	Rep1	0.778488	0	0.358244	0.935964	0.765207	1.07981	1.14057	1.05777	0.92061	1.19726	0.94136
MIA PaCa2	0	Rep1	0.249512	0.211501	2.96317	0.892624	0.369494	0.269924	0.794652	1.02326	0.776163	0.950384	0.340589
MIA PaCa2	0	Rep1	0.600506	3.59891	2.37991	0.724956	0.319986	0.318117	0.809423	0.700016	0.850572	0.947268	1.14611
MIA PaCa2	0	Rep1	1.49052	1.61045	0.551303	1.24383	0.667853	0.878135	0.533636	0.763023	1.0531	0.661569	1.29161
MIA PaCa2	0	Rep1	0.846858	0.292493	1.07133	1.08228	0.954404	1.61228	0.930083	0.912502	0.932809	0.931427	1.41018
MIA PaCa2	0	Rep1	1.84414	0	0.71241	1.21253	0.524371	0.666047	0.630511	0.786473	1.01567	0.945507	1.82567
MIA PaCa2	0	Rep1	0.830391	0	0.750477	1.10507	0.550018	0.599708	0.931962	0.722847	0.945443	0.869408	0.614412
MIA PaCa2	0	Rep1	1.00464	0	0.852444	1.02819	0.812261	1.15767	0.936845	0.827215	0.803799	0.712694	0.926838
MIA PaCa2	0	Rep1	1.01597	0	0.758634	1.15714	0.614485	0.859737	0.722472	0.753987	0.933382	0.852094	0.99415
MIA PaCa2	0	Rep1	1.67302	0	0.458172	1.15965	0.561243	0.886646	0.651946	0.593869	0.945969	0.908207	1.01617
MIA PaCa2	0	Rep1	0.93096	2.58818	0.766793	1.00921	0.598542	0.469691	1.11315	0.888642	0.978006	1.15175	0.679822
MIA PaCa2	0	Rep1	0.675577	0	0.523431	0.863198	0.312855	0.390371	1.14779	0.771969	0.919321	0.807676	0.68238
MIA PaCa2	0	Rep1	1.77071	0.708091	0.442538	1.23279	0.541022	1.5251	0.662244	0.857496	1.03832	0.850466	1.04852
MIA PaCa2	0	Rep1	1.27	0	0.615881	1.17727	0.612243	1.0786	0.846465	0.77754	1.00964	1.03435	0.728101
MIA PaCa2	0	Rep1	1.56961	0	0.436419	1.18915	0.705836	1.14306	0.702521	1.10726	0.949285	1.17292	0.928746
MIA PaCa2	0	Rep1	1.46152	0	0.350766	1.26961	0.582825	1.18357	0.640286	0.860332	1.01603	1.00464	1.08155
MIA PaCa2	0	Rep1	1.34022	0	0.499638	1.22039	0.569168	1.1181	0.695975	0.769958	0.926954	0.979751	0.993834
MIA PaCa2	0	Rep1	0.985748	0	0.269193	1.18058	0.320701	0.597244	0.707647	0.932323	0.979451	0.590254	1.61951
MIA PaCa2	0	Rep1	1.18126	0	0.350766	1.00055	0.863037	0.438944	0.903792	0.837868	0.917499	0.51631	1.30317
MIA PaCa2	0	Rep1	1.17304	0	0.479925	1.03912	0.799424	1.35793	1.0569	0.709378	0.938932	1.13063	1.4954
MIA PaCa2	0	Rep1	1.53899	0	0.522752	1.17591	0.482177	1.72474	0.783258	0.765282	1.04066	1.33856	1.30523
MIA PaCa2	0	Rep1	0.950228	0	0.254918	1.12217	1.03763	1.64391	0.860031	1.14429	0.910677	0.952073	1.10336
MIA PaCa2	0	Rep1	1.05404	0	0.178103	1.18998	0.700648	0.866542	0.862304	0.97714	0.942563	0.68491	0.733991
MIA PaCa2	0	Rep1	1.11065	0	0.65327	0.951162	0.574817	1.19524	1.06675	0.814129	0.844987	0.919126	0.853592
MIA PaCa2	0	Rep1	1.27383	0	0.379997	1.17629	0.679041	1.01221	0.68373	1.12926	0.999661	0.977473	0.920057
MIA PaCa2	0	Rep1	1.08105	0	0.350766	1.10486	0.517521	1.15328	0.784892	0.884557	0.997611	1.10119	1.22566
MIA PaCa2	0	Rep1	1.34166	0	0.506436	1.26298	0.353712	0.420535	0.561993	0.679955	1.01023	0.5646	1.00084
MIA PaCa2	0	Rep1	0.986368	0	1.05434	0.895888	0.382814	0.401845	1.06107	0.702863	0.975195	0.797211	0.607676
MIA PaCa2	0	Rep1	2.10975	0	0.387474	1.18998	0.570788	1.78278	0.780351	0.765691	1.03474	1.02253	1.17905
MIA PaCa2	0	Rep1	1.06957	0	0.448655	0.940885	0.959853	1.36748	0.957836	0.893942	0.9729	0.912188	1.13054
MIA PaCa2	0	Rep1	0.875679	7.46209	0.49692	0.979109	1.08873	1.33073	1.06895	0.901575	0.935388	0.913849	1.45914
MIA PaCa2	0	Rep1	0.685924	0	0.384756	0.907589	1.15541	0.999911	1.25167	0.956052	0.892258	1.40398	0.967674
MIA PaCa2	0	Rep1	1.2575	0.520616	0.702213	1.00284	0.773639	0.808492	1.24563	0.674603	0.81149	1.17723	0.701828
MIA PaCa2	0	Rep1	0.436267	0	0.700854	0.890496	0.831935	0.602577	1.33247	0.936272	1.03475	0.988191	0.816757
MIA PaCa2	0	Rep1	1.42901	0	0.438458	1.05905	0.596448	0.87603	0.825864	0.900603	0.940316	1.53721	1.065
MIA PaCa2	0	Rep1	1.09822	0	0.49284	1.16466	0.406268	0.698969	0.733019	0.830483	0.951245	0.582324	0.815495
MIA PaCa2	0	Rep1	0.902146	0	0.655308	0.772015	0.819344	0.888156	1.0342	1.12255	0.964601	1.2458	0.646925
MIA PaCa2	0	Rep1	1.16869	0	0.349407	1.05548	0.930743	0.877926	0.754881	1.16598	0.876883	1.08167	0.882368
MIA PaCa2	0	Rep1	1.40157	0	0.276671	0.969595	0.858654	0.736788	0.759819	1.11991	1.00109	1.44475	1.26726
MIA PaCa2	0	Rep1	1.12794	0	0.386795	0.838239	0.889789	1.20709	1.15474	1.00136	0.992266	1.34319	0.706192
MIA PaCa2	0	Rep1	1.68699	0.622776	0.922463	0.693559	0.710014	1.56405	2.89169	0.851712	1.01988	1.10964	0.491947
MIA PaCa2	0	Rep1	0.680554	0	0.727365	1.06396	0.551816	1.13133	0.770577	0.750611	0.95494	1.12076	0.679092
MIA PaCa2	0	Rep1	0.617383	0	0.374559	1.04147	0.965129	0.730509	0.707952	1.14971	1.06305	1.04135	0.739001
MIA PaCa2	0	Rep1	1.03998	0	0.732803	1.13392	0.669882	0.625969	0.767936	0.818567	0.919718	1.18335	0.644191
MIA PaCa2	0	Rep1	1.0274	0	0.6186	1.04713	0.610048	1.24543	1.08691	1.0831	0.988778	1.32137	0.932517
MIA PaCa2	0	Rep1	0.613901	0	0.52547	1.0357	0.540115	1.12941	0.996395	1.09457	0.978351	1.05903	0.516357
MIA PaCa2	0	Rep1	1.01625	0	0.285507	1.10426	0.475541	0.884585	0.972193	0.972235	1.0065	1.04048	1.2115
MIA PaCa2	0	Rep1	0.713698	0.586473	0.534308	0.958698	1.11007	0.941608	1.21936	1.05414	0.883256	0.845345	1.011
MIA PaCa2	0	Rep1	0.611494	0	0.40583	1.01059	0.848689	0.566275	0.802692	1.138	1.0611	1.37247	0.963418
MIA PaCa2	0	Rep1	1.04009	0	0.517992	1.10068	1.16589	0.85016	0.934073	1.17707	1.03179	1.1839	1.19359
MIA PaCa2	0	Rep1	0.842742	0	0.505077	1.05895	0.842397	1.61986	1.16048	0.877861	1.07279	1.22717	1.50466
MIA PaCa2	0	Rep1	1.21253	1.33614	0.547223	0.923612	1.06692	1.30551	1.34403	1.02779	0.949244	1.2349	1.22591
MIA PaCa2	0	Rep1	0.713026	0	0.384756	0.855051	1.27991	1.29951	1.00339	0.999799	0.949721	0.94944	1.76749
MIA PaCa2	0	Rep1	1.49457	1.67191	0.655988	1.01031	0.854567	1.53233	1.34886	0.993276	0.817302	1.2685	0.661721
MIA PaCa2	0	Rep1	1.37103	0	0.423503	1.16819	0.747391	1.60311	0.778508	0.88451	0.977816	1.47233	1.08003
MIA PaCa2	0	Rep1	0.345404	1.21916	2.52742	0.72622	0.331046	0.219397	1.17204	1.05288	0.94428	0.884309	1.86773
MIA PaCa2	0	Rep1	0.578651	0	0.426902	1.14208	0.789108	1.10043	0.723463	1.00578	1.07006	1.05009	0.762334
MIA PaCa2	0	Rep1	1.55964	0	0.40311	1.07425	0.677956	1.37535	1.01013	0.714253	1.01303	1.19386	1.65499
MIA PaCa2	0	Rep1	1.46689	0	0.424184	1.05139	1.05497	0.739496	0.78789	0.939556	0.966056	0.761332	1.30417
MIA PaCa2	0	Rep1	1.0045	0	0.547223	1.03779	1.12607	0.97942	0.977386	1.08248	0.934456	0.965874	0.791582
MIA PaCa2	0	Rep1	1.44469	0	0.409908	1.21249	0.814861	1.38254	0.599466	0.836823	1.00811	1.01632	1.50522
MIA PaCa2	0	Rep1	0.297629	0.823217	3.10864	0.767551	0.248292	0.213143	0.967771	0.884524	0.987268	0.856202	1.73046
MIA PaCa2	0	Rep1	0.693444	4.27879	0.549263	1.18126	1.11291	0.783421	0.666956	0.914084	1.00319	0.711504	1.54899
MIA PaCa2	0	Rep1	0.75272	0	0.808938	1.09061	1.02342	0.610714	0.806087	0.960094	1.05704	0.913677	0.623749
MIA PaCa2	0	Rep1	0.83421	0	0.725325	1.02242	0.898066	0.624732	1.20904	1.09748	0.913203	0.66858	0.607557
MIA PaCa2	0	Rep1	1.28399	0	0.443897	1.12319	0.613212	0.953252	0.643075	0.769307	0.93273	0.962381	1.16308
MIA PaCa2	0	Rep1	0.63462	0	0.471768	1.02843	1.26484	1.25895	0.789057	0.950707	0.841829	0.761231	1.3326
MIA PaCa2	0	Rep1	0.457298	0	2.18685	0.661454	0.499963	0.328186	1.1846	0.779043	0.766209	0.867727	1.0058
MIA PaCa2	0	Rep1	0.451693	0	1.51523	0.912371	0.398072	0.308464	0.967444	0.879013	0.951509	0.883831	1.67874
MIA PaCa2	0	Rep1	0.6809	0	0.760674	1.02288	0.341476	0.314944	0.726462	0.772863	0.950934	0.801948	1.04135
MIA PaCa2	0	Rep1	0.624882	0	0.453414	1.10841	0.659903	0.429582	0.76382	0.96996	0.886913	0.880479	0.945732
MIA PaCa2	0	Rep1	0.480251	0	0.257637	1.07227	0.855604	0.342693	0.743764	1.04647	0.854218	0.811317	0.625055
MIA PaCa2	0	Rep1	1.23649	3.72176	0.58937	1.08478	0.767933	0.731663	0.693289	0.809613	0.893858	0.778797	0.862373
MIA PaCa2	0	Rep1	0.735116	0	0.796023	1.15512	0.715099	0.843653	0.885011	0.878387	0.883057	0.868028	0.557422
MIA PaCa2	0	Rep1	0.333136	0	1.85376	0.668722	0.235668	0.12763	1.12079	0.906796	1.00375	0.812941	1.13633
MIA PaCa2	0	Rep1	0.916903	0	0.52683	0.992284	0.743529	0.555832	0.926427	0.870367	0.93801	1.05906	0.802565
MIA PaCa2	0	Rep1	0.651679	0	0.722607	0.899444	0.362096	0.184073	0.974927	0.751605	0.928917	0.861503	0.734079
MIA PaCa2	0	Rep1	0.946121	1.36291	1.03463	1.12296	1.05886	1.26585	0.74873	0.825249	0.915385	0.885659	0.997282
MIA PaCa2	0	Rep1	1.09591	0	0.554021	1.09348	0.890188	1.14822	0.737523	0.765187	0.973807	1.15729	0.851591
MIA PaCa2	0	Rep1	1.41773	0	0.441857	1.13495	0.579402	1.00372	0.730226	1.00088	0.932476	0.854983	1.29431
MIA PaCa2	0	Rep1	1.15303	1.7584	0.77223	0.828223	0.994328	0.71551	1.33703	0.747859	0.875367	0.934735	0.585885
MIA PaCa2	0	Rep1	1.25766	0	0.564218	1.14429	0.944037	1.04655	0.713707	1.06336	1.0329	1.2613	0.948041
MIA PaCa2	0	Rep1	1.20039	0	0.827292	1.14755	0.777202	0.634324	0.668303	0.792478	0.998082	0.970151	0.557019
MIA PaCa2	0	Rep1	0.714298	0	0.443217	1.12217	0.911267	0.687224	0.967046	0.923668	1.07343	0.700803	0.706561
MIA PaCa2	0	Rep1	1.52066	0	0.590729	1.263	0.42857	1.76632	0.65687	0.703732	0.910017	0.803658	1.02383
MIA PaCa2	0	Rep1	1.57417	6.0438	0.509835	0.893396	1.16098	1.03584	1.31823	0.960031	0.947606	1.24702	1.21318
MIA PaCa2	0	Rep1	0.541704	0	0.320856	0.987594	0.878226	0.545481	0.865087	1.12061	1.01336	0.74948	1.02542
MIA PaCa2	0	Rep1	1.22762	3.323	0.785826	1.10294	0.609051	1.53025	0.975386	0.900763	0.892676	0.945067	1.16952
MIA PaCa2	0	Rep1	0.974663	0	0.52751	1.13959	0.985118	0.706383	0.949273	0.766643	1.0031	1.0174	1.00266
MIA PaCa2	0	Rep1	1.5332	0	0.503717	1.15046	0.742835	2.20994	0.756352	1.0337	0.947175	0.905634	1.171
MIA PaCa2	0	Rep1	0.42349	0	0.438458	0.787933	0.842783	0.748971	1.64595	1.18989	1.04985	1.08263	0.722112
MIA PaCa2	0	Rep1	2.12244	0	0.332412	1.25029	0.532595	1.82519	0.67564	0.792585	0.935886	0.820128	0.672321
MIA PaCa2	0	Rep1	0.513644	0	0.418065	0.832387	0.757996	1.53044	1.92643	1.01398	1.06325	1.19393	0.461459
MIA PaCa2	0	Rep1	0.816233	0	0.3732	1.14676	0.647529	1.72414	0.683348	1.4091	0.833861	0.837774	0.681551
MIA PaCa2	0	Rep1	1.72408	0	0.40379	1.04729	0.787674	1.40923	0.896772	1.15385	1.01336	0.924154	1.39465
MIA PaCa2	0	Rep1	0.792861	0	0.622679	1.09665	0.659879	0.85616	0.930902	0.752768	0.97297	0.943851	0.954429
MIA PaCa2	0	Rep1	0.593265	0	0.4976	1.01369	0.277873	0.307025	1.11733	0.909007	0.875077	0.682273	0.834459
MIA PaCa2	0	Rep1	0.91347	0	0.396312	0.95912	0.451486	0.950214	1.09785	1.00664	0.936747	1.38625	0.736906
MIA PaCa2	0	Rep1	1.13294	0	0.515274	0.937714	0.684486	0.721592	1.18182	0.894918	1.00336	0.887531	0.882514
MIA PaCa2	0	Rep1	1.1743	0	0.852444	0.900816	0.893161	0.939521	1.38709	0.842893	0.997026	1.11106	1.08685
MIA PaCa2	0	Rep1	1.35723	0	0.296383	1.04334	0.613852	1.16658	0.974547	1.26916	0.913753	0.941864	1.30724
MIA PaCa2	0	Rep1	0.931554	0	0.377958	0.93142	1.19462	0.934473	1.04753	1.09192	0.962749	1.06758	0.528089
MIA PaCa2	0	Rep1	0.478597	0	0.482645	0.972753	0.71217	0.644129	1.10057	1.11116	1.07109	1.2421	1.29784
MIA PaCa2	0	Rep1	1.21983	0	0.473807	0.961848	0.867563	1.27426	0.962302	1.01136	0.904662	1.34364	0.995104
MIA PaCa2	0	Rep1	1.26198	0	0.239963	0.95964	0.821074	0.336622	1.27062	1.06141	1.01853	1.41929	0.879867
MIA PaCa2	0	Rep1	1.43227	0	0.487403	1.12823	0.759349	0.986497	0.775309	0.864681	1.06806	1.0836	1.1853
MIA PaCa2	0	Rep1	0.553292	0	0.532268	1.03208	0.877644	0.720387	0.936022	1.12087	1.00125	1.01569	0.849959
MIA PaCa2	0	Rep1	1.35556	0	0.355526	1.00885	1.38612	1.24192	1.06845	1.05527	0.946983	0.969051	1.02235
MIA PaCa2	0	Rep1	1.00874	0	0.504398	0.988028	0.787791	1.22452	0.842486	1.03217	1.01188	1.08247	1.28663
MIA PaCa2	0	Rep1	0.63042	0	0.376598	0.965353	0.841068	0.70398	1.186	1.27412	0.880007	1.13035	0.889326
MIA PaCa2	0	Rep1	1.70179	0	0.493521	1.22765	0.672521	1.19013	0.669201	0.707076	0.958919	1.11456	1.14263
MIA PaCa2	0	Rep1	1.05349	0	0.46565	1.14069	0.733454	0.830385	0.668708	0.80702	0.929091	1.45662	1.26018
MIA PaCa2	0	Rep1	0.532702	0	0.24744	0.978338	1.19532	0.759994	1.2254	1.02062	0.994463	0.939274	0.831842
MIA PaCa2	0	Rep1	0.655385	0	0.641712	1.16601	1.10754	0.955782	0.886165	1.18174	1.01647	0.808228	0.795492
MIA PaCa2	0	Rep1	1.67907	0	0.389514	1.03828	1.40499	0.322957	0.904317	0.951205	0.981073	1.09327	0.948603
MIA PaCa2	0	Rep1	1.40737	0	0.550622	1.0081	0.739342	0.824373	1.14894	0.988837	0.966087	1.37419	0.901694
MIA PaCa2	0	Rep1	0.86071	0	1.0625	1.02746	0.702147	0.672421	0.930658	0.913649	0.843458	0.970366	0.427758
MIA PaCa2	0	Rep1	1.23238	0	0.748439	1.07171	0.879336	0.826072	0.905134	0.847145	0.801454	0.92509	0.458902
MIA PaCa2	0	Rep1	0.442701	0	0.520712	0.98529	1.13629	1.00608	1.07639	1.16802	1.05216	0.792318	0.880359
MIA PaCa2	0	Rep1	0.97648	0	0.625398	1.13591	0.780958	0.713341	0.901172	1.02005	0.98755	0.959513	0.693505
MIA PaCa2	0	Rep1	1.07409	0	0.68114	0.98469	1.10258	0.776578	1.26638	0.925565	0.982063	1.03352	1.202
MIA PaCa2	0	Rep1	1.22113	0	0.986361	1.15979	0.599808	1.06805	0.687089	0.707411	0.972051	1.22816	1.20575
MIA PaCa2	0	Rep1	1.2643	0	0.613842	0.890337	1.22999	1.0763	1.02143	0.998911	0.997611	1.02411	0.832581
MIA PaCa2	0	Rep1	0.976026	0	0.443217	0.944683	0.704851	0.998224	0.911096	0.846941	0.97166	1.5391	1.03042
MIA PaCa2	0	Rep1	0.783135	0	0.342609	1.01387	1.10699	0.583089	1.25185	1.1646	0.953632	1.0717	1.18469
MIA PaCa2	0	Rep1	0.709601	2.08615	0.726006	0.976749	1.22844	1.22806	0.80773	0.846222	0.970326	0.844089	1.15058
MIA PaCa2	0	Rep1	0.544799	0	0.405149	1.07753	0.660235	0.717958	0.881939	1.14786	0.994617	1.12353	1.14848
MIA PaCa2	0	Rep1	0.232941	0	0.27939	1.14593	0.779714	0.682492	0.794785	1.10833	1.01848	0.706779	0.935226
MIA PaCa2	0	Rep1	0.954309	0	0.602286	0.896709	1.57159	1.22055	1.37462	0.76711	0.950923	1.12914	0.944654
MIA PaCa2	0	Rep1	1.02266	0	0.125759	1.10655	1.14444	0.674444	0.761855	1.18409	0.986228	1.00988	0.92937
MIA PaCa2	0	Rep1	1.33759	0	0.436419	1.01732	0.940313	1.2402	0.99696	0.726177	0.91352	1.11005	0.959016
MIA PaCa2	0	Rep1	0.244381	0	0.421464	1.11821	0.986911	0.678548	0.819049	1.25879	0.947606	0.707765	1.29595
MIA PaCa2	0	Rep1	1.79054	0	0.780387	0.610589	1.06649	1.46752	2.95558	1.06927	1.00867	1.43275	0.545866
MIA PaCa2	0	Rep1	0.680575	0	0.430301	1.0742	0.924982	1.1943	0.838247	1.00233	0.966052	1.17023	1.77843
MIA PaCa2	0	Rep1	1.26167	0	0.320177	1.09365	1.08981	0.315678	0.811476	0.90886	0.997611	0.879748	1.79594
MIA PaCa2	0	Rep1	0.937508	0	0.615881	1.03359	1.48398	0.901443	0.924248	1.04641	1.01416	0.911999	1.04992
MIA PaCa2	0	Rep1	0.686804	2.70216	1.56553	0.854218	0.431215	0.232681	0.813598	0.694683	1.03974	0.8882	1.2454
MIA PaCa2	0	Rep1	0.904584	0	1.08289	0.891613	0.724508	1.10595	1.38701	1.01554	0.852949	1.30038	0.53397
MIA PaCa2	0	Rep1	0.62046	0	0.757275	1.1219	0.74053	0.854593	0.688418	1.06637	0.978276	0.879386	0.821483
MIA PaCa2	0	Rep1	0.852594	3.6373	1.99583	0.846596	0.760871	0.503562	0.761447	0.525894	0.776035	0.93189	1.06736
MIA PaCa2	0	Rep1	0.388298	0	0.791264	1.02825	0.826059	0.806431	0.878225	0.942261	1.00204	1.03983	0.632068
MIA PaCa2	0	Rep1	1.49119	0	0.590049	1.08552	0.629902	1.14021	1.0053	0.607386	1.05536	0.983924	1.45709
MIA PaCa2	0	Rep1	0.897065	0.19895	1.57505	0.881534	0.882787	1.19151	1.33719	0.816873	0.968518	1.06769	0.824453
MIA PaCa2	0	Rep1	1.05653	0	0.488762	1.07598	1.16458	1.26423	0.793909	0.918522	0.98879	1.15668	1.56618
MIA PaCa2	0	Rep1	0.997001	0	0.749798	0.95234	1.43648	1.17294	1.14627	0.973578	1.05414	1.03954	1.11019
MIA PaCa2	0	Rep1	0.650501	0	0.4976	0.880065	0.996426	0.648073	1.57888	1.11721	0.837029	0.587725	0.658843
MIA PaCa2	0	Rep1	0.639564	0	0.655308	1.10648	1.10611	0.670195	0.621378	0.772482	0.858169	0.649546	0.707241
MIA PaCa2	0	Rep1	0.402069	0	0.853124	0.840908	0.441444	0.439219	1.27269	1.15439	0.93832	0.851097	1.13787
MIA PaCa2	0	Rep1	0.3869	0	0.68114	0.931356	0.491207	0.336089	1.0529	0.96455	0.807086	0.660482	0.781031
MIA PaCa2	0	Rep1	0.315955	0.580722	3.32753	0.879857	0.282117	0.249414	0.796897	0.857519	0.865277	0.889599	0.730799
MIA PaCa2	0	Rep1	0.163707	0	0.228407	1.03038	0.847542	0.440682	0.735314	1.11836	0.920849	0.639654	0.607103
MIA PaCa2	0	Rep1	0.292272	0	0.321536	1.11348	0.881001	0.528531	0.850112	1.02604	0.934072	0.555761	0.66253
MIA PaCa2	0	Rep1	0.337279	0	0.792624	0.967672	0.546709	0.315848	0.700379	0.960772	0.850673	0.802485	0.437324
MIA PaCa2	0	Rep1	0.794552	0	0.446616	0.927586	0.797846	0.550834	0.965365	1.03126	0.837001	0.705879	1.01705
MIA PaCa2	0	Rep1	0.410624	0	0.49692	0.95766	1.03829	0.63551	0.827944	1.0524	0.823149	0.688599	0.467318
MIA PaCa2	0	Rep1	0.713107	0	1.23652	0.958645	0.476222	0.450501	0.842524	0.838166	0.860831	0.978302	1.00074
MIA PaCa2	0	Rep1	0.381214	0	1.92922	0.841725	0.372082	0.278706	0.746112	0.738726	0.923248	0.851297	0.508014
MIA PaCa2	0	Rep1	1.30813	5.46967	0.62064	1.11849	0.839777	1.02697	0.825446	0.729178	1.00324	0.721219	1.02126
MIA PaCa2	0	Rep1	1.07988	0.564912	0.647151	1.02222	0.823004	0.633968	0.934455	0.912666	0.91889	0.722877	0.753444
MIA PaCa2	0	Rep1	1.55328	0	0.787185	1.18231	0.818233	0.551302	0.66226	0.458824	0.995213	0.82152	0.80552
MIA PaCa2	0	Rep1	0.869055	0	0.629477	1.02591	0.565108	1.39895	0.942337	0.786535	1.04233	1.11925	0.847442
MIA PaCa2	0	Rep1	0.93577	1.46939	0.995198	1.08865	0.561984	0.867316	0.922236	0.801917	0.761514	0.871847	0.672158
MIA PaCa2	0	Rep1	0.67476	0	0.352127	1.17592	0.35412	0.614643	0.724243	0.9684	0.987828	0.392762	0.266553
MIA PaCa2	0	Rep1	1.77057	0	0.475167	1.25014	0.686511	2.13357	0.584744	0.539756	1.01684	1.09139	0.995104
MIA PaCa2	0	Rep1	1.34391	0	1.32897	0.818805	0.481782	1.1136	1.81783	0.843959	0.644488	1.20797	1.04353
MIA PaCa2	0	Rep1	0.507604	0	0.395633	0.958107	0.788738	0.863764	1.13108	1.00361	1.02298	1.04349	1.09723
MIA PaCa2	0	Rep1	0.547964	0	0.632196	1.0719	0.72603	0.756366	0.706499	1.14157	0.844977	1.04636	0.356856
MIA PaCa2	0	Rep1	1.08329	0	0.422144	1.11929	0.611779	0.733173	0.636161	0.980051	0.977742	1.25893	0.730128
MIA PaCa2	0	Rep1	0.845798	0	0.49556	1.15376	0.992557	1.29461	0.603327	1.17528	0.972599	0.879782	0.864405
MIA PaCa2	0	Rep1	1.41661	2.32812	0.515954	1.12474	1.04324	1.60914	0.710014	0.78727	0.984982	0.882129	0.755943
MIA PaCa2	0	Rep1	0.527715	0	0.49488	1.03392	0.703937	1.02033	1.06881	0.924164	1.0517	1.06251	0.519934
MIA PaCa2	0	Rep1	0.709248	0	0.486723	1.08637	0.87826	0.60855	0.752655	0.982165	1.05838	0.892536	0.848512
MIA PaCa2	0	Rep1	1.12072	0	0.509156	0.98271	0.887263	1.3003	1.34213	1.06045	1.00981	0.883292	0.740109
MIA PaCa2	0	Rep1	1.48775	0	0.590729	1.18942	0.667843	1.98993	0.863425	0.646463	1.02565	1.35744	1.0239
MIA PaCa2	0	Rep1	0.823289	0.930309	0.673662	1.01651	0.884742	1.15826	0.780137	0.812463	0.832262	1.15824	1.19376
MIA PaCa2	0	Rep1	0.849799	6.2209	0.503717	1.13628	0.600933	0.700086	0.981244	0.858742	1.10009	0.729157	1.17207
MIA PaCa2	0	Rep1	1.08643	0	0.328334	1.2012	0.59033	1.84797	0.914904	1.16182	1.07517	0.924267	0.802842
MIA PaCa2	0	Rep1	0.953759	4.80175	0.968007	1.08014	0.498635	0.589976	0.694004	0.660951	0.911792	0.737204	1.34974
MIA PaCa2	0	Rep1	0.822066	0	0.781748	1.05896	0.819122	1.45027	0.917393	0.760966	0.949696	1.02328	1.37841
MIA PaCa2	0	Rep1	1.10152	0	0.52547	0.990733	0.766161	1.07221	0.862863	0.788423	0.994479	1.02179	0.768128
MIA PaCa2	0	Rep1	0.892685	0	0.133237	1.17787	1.60963	0.468686	0.788893	1.13855	1.0112	0.523482	1.13969
MIA PaCa2	0	Rep1	0.884803	0	0.71037	1.17241	0.670341	0.943111	0.698965	0.750282	1.0285	1.21866	0.830503
MIA PaCa2	0	Rep1	0.950734	2.97835	0.771551	0.739057	0.783591	0.99934	1.95509	0.664805	0.925216	1.09083	0.723511
MIA PaCa2	0	Rep1	1.00106	0	0.664146	1.0279	1.07464	1.00448	1.0879	0.853809	0.959906	1.0239	1.4684
MIA PaCa2	0	Rep1	0.648759	0	0.332412	1.06949	1.06439	0.955231	0.993537	1.12724	0.995583	0.916665	0.748093
MIA PaCa2	0	Rep1	0.252794	0	0.440498	1.19571	1.0682	0.610486	0.745275	1.20675	1.0143	0.885231	0.685766
MIA PaCa2	0	Rep1	0.679285	2.0259	0.670263	0.809308	1.00347	0.68092	1.18139	0.974839	1.01179	0.998458	0.647188
MIA PaCa2	0	Rep1	1.03268	0	0.278711	0.891363	0.859889	1.00477	1.40943	1.04495	1.03338	1.18498	0.805451
MIA PaCa2	0	Rep1	0.887829	0	0.499638	1.117	0.686743	0.693927	0.786214	1.10634	0.947542	1.38316	0.701321
MIA PaCa2	0	Rep1	0.862493	0	0.89663	0.92148	0.713968	1.08535	1.60724	0.768759	1.01665	1.22271	0.814971
MIA PaCa2	0	Rep1	0.801765	0	1.02851	0.82951	1.07741	1.44811	1.32444	0.870618	0.917943	1.07844	1.49519
MIA PaCa2	0	Rep1	0.236578	0	2.61443	0.849672	0.296557	0.196458	1.0094	0.971691	0.765193	0.853181	1.04405
MIA PaCa2	0	Rep1	1.11427	5.53422	0.481284	1.07909	0.64989	1.2199	0.951449	0.69759	0.957185	0.680184	0.718786
MIA PaCa2	0	Rep1	1.23486	0	0.681819	1.0868	0.601998	1.04562	0.978693	0.59821	0.93854	0.917237	0.974863
MIA PaCa2	0	Rep1	1.24318	0	0.687258	0.962567	0.666974	2.05588	1.43716	0.940443	1.00342	0.971193	0.731753
MIA PaCa2	0	Rep1	0.804645	0	1.07337	0.951963	0.324752	0.354473	0.741392	0.693509	0.979962	0.742338	0.801018
MIA PaCa2	0	Rep1	0.988063	0	0.630156	1.06985	0.638813	1.35987	1.10276	0.625039	0.960501	0.802954	1.88642
MIA PaCa2	0	Rep1	1.40676	1.54782	0.74232	1.04641	0.827199	1.75821	0.902723	0.597562	1.00657	0.930134	1.30139
MIA PaCa2	0	Rep1	0.500709	0	1.3113	0.836498	0.346602	0.334147	1.14197	0.720777	1.04031	0.919744	1.46703
MIA PaCa2	0	Rep1	0.670197	0	0.634235	0.990071	0.680123	0.906478	0.876175	0.96678	0.993819	1.08535	1.09238
MIA PaCa2	0	Rep1	1.4415	0	0.652589	1.21774	0.594295	1.95319	0.765602	0.873929	0.768738	1.25747	0.967159
MIA PaCa2	0	Rep1	1.17752	0	0.789905	1.16132	0.448901	1.67878	0.830862	0.716793	1.01968	0.687693	1.07146
MIA PaCa2	0	Rep1	0.669138	1.61875	0.83885	0.951672	0.810451	0.920996	1.13209	0.955	1.03185	1.11714	0.875372
MIA PaCa2	0	Rep1	1.29992	0	0.493521	1.21161	0.830104	1.24717	0.668059	0.750926	0.888008	1.42674	0.86783
MIA PaCa2	0	Rep1	1.02586	0	0.606365	1.024	0.681019	1.32171	0.895999	0.942135	0.957179	1.09418	0.697158
MIA PaCa2	0	Rep1	0.732144	0	0.512555	1.14804	0.523128	1.48879	0.66909	1.43692	0.836728	0.888193	0.547987
MIA PaCa2	0	Rep1	0.942	0.567895	0.643752	1.07225	0.457924	0.845042	0.882921	0.858458	0.996129	0.966781	0.790944
MIA PaCa2	0	Rep1	0.958422	0	0.613842	0.942621	0.806072	1.29825	1.08708	0.984799	0.998553	1.07534	0.809461
MIA PaCa2	0	Rep1	0.491559	0	0.470408	1.10465	0.469691	0.505841	0.809909	1.10224	0.977777	0.860925	0.685686
MIA PaCa2	0	Rep1	0.963347	0	1.07609	0.858444	0.653271	1.0872	1.62569	0.964319	0.972468	1.1881	0.831049
MIA PaCa2	0	Rep1	1.00797	0	0.49692	1.08668	0.541873	0.989821	0.783144	0.813494	0.999824	1.45126	0.729554
MIA PaCa2	0	Rep1	0.818972	0	0.621999	1.0186	0.561604	1.07987	0.925125	0.905481	0.991855	1.25859	0.73719
MIA PaCa2	0	Rep1	0.93553	0	1.19165	0.803554	0.622454	0.784848	1.47797	0.917275	0.863216	1.47011	0.75244
MIA PaCa2	0	Rep1	0.939613	0.237735	1.31809	0.982286	0.831599	2.27118	1.2729	0.640021	0.936561	1.10297	0.86733
MIA PaCa2	0	Rep1	0.957202	0	0.449334	0.986708	1.32969	0.557923	0.935691	1.15273	0.893702	0.815245	0.47823
MIA PaCa2	0	Rep1	0.272514	0	0.670943	0.803113	0.33225	0.190604	1.4658	0.906085	0.950315	0.937335	0.977826
MIA PaCa2	0	Rep1	0.58239	0	0.250839	1.11117	1.55819	1.07594	0.742575	1.08516	0.879323	0.777758	0.883861
MIA PaCa2	0	Rep1	0.127543	0	2.11684	0.552159	0.304579	0.168089	2.42067	0.92348	0.877147	0.921012	0.873794
MIA PaCa2	0	Rep1	0.954515	1.95439	0.77495	0.892315	0.9953	0.783517	1.03562	0.889777	0.946228	1.14858	0.741612
MIA PaCa2	0	Rep1	0.892937	0	0.476526	0.797796	1.40179	1.05746	1.04551	0.819244	0.819185	0.919971	1.28736
MIA PaCa2	0	Rep1	0.499462	0	0.458852	1.02348	0.900318	0.40017	1.01823	0.942386	0.888193	0.921831	0.794399
MIA PaCa2	0	Rep1	0.991472	0	0.46769	1.02305	0.542444	1.24207	0.701945	0.763206	0.946983	0.855727	1.10465
MIA PaCa2	0	Rep1	0.653882	0	0.271913	1.02093	0.514169	0.650483	0.988676	1.07049	0.960813	0.959346	0.628637
MIA PaCa2	0	Rep1	0.71302	2.11788	0.71513	0.815348	0.939558	0.756892	1.337	1.08806	0.96762	0.831341	0.42181
MIA PaCa2	0	Rep1	0.626595	0	0.723966	0.783298	0.379268	0.273648	1.19652	0.781051	0.873884	0.842765	0.773373
MIA PaCa2	0	Rep1	1.11083	0.783959	0.399711	1.09801	0.629993	0.530383	0.747298	0.631728	0.894578	1.20454	1.0394
MIA PaCa2	0	Rep1	0.522101	0	2.7463	0.749579	0.39795	0.308937	0.646537	0.689646	0.846897	0.894106	0.887671
MIA PaCa2	0	Rep1	0.435857	0	0.344649	1.07731	0.554921	0.302784	0.758762	0.765154	0.852769	0.874851	0.547042
MIA PaCa2	0	Rep1	0.766277	0	0.46497	0.995662	0.982558	0.655969	0.970894	1.07303	0.956555	0.892575	1.11294
MIA PaCa2	0	Rep1	0.86818	0	0.692016	1.13068	0.546169	0.705857	0.688184	0.6783	1.0288	0.958587	0.558318
MIA PaCa2	0	Rep1	0.517866	0	0.626757	0.661353	0.824252	0.635579	1.37625	0.935669	0.896537	0.88286	0.740425
MIA PaCa2	0	Rep1	1.06665	0.353232	0.887114	0.783794	0.78736	0.787696	1.75885	0.716856	1.02124	0.984724	0.660398
MIA PaCa2	0	Rep1	0.647221	0	0.493521	0.903553	0.522745	0.471751	1.37266	1.01414	0.87949	1.0354	0.261047
MIA PaCa2	0	Rep1	0.422235	0	1.78103	0.806095	0.516347	0.422907	0.870373	0.979267	0.907656	0.865136	0.614346
MIA PaCa2	0	Rep1	0.958358	0	0.30726	1.0666	1.07374	0.59533	0.874017	1.09126	0.984562	0.73846	0.658668
MIA PaCa2	0	Rep1	0.58024	0	0.4337	1.12242	0.778807	0.64527	0.627007	1.16451	0.966192	0.902185	0.872424
MIA PaCa2	0	Rep1	1.0526	3.5781	0.773591	0.970389	0.84281	0.687255	1.19189	0.748251	0.843427	0.956875	0.715169
MIA PaCa2	0	Rep1	0.909333	0	0.503037	1.08163	0.859885	0.764769	0.876694	1.21588	0.921398	0.785122	0.600069
MIA PaCa2	0	Rep1	0.802417	0	0.440498	1.16355	0.771872	0.798662	0.626926	0.9991	0.866821	1.06883	0.573584
MIA PaCa2	0	Rep1	0.843744	4.894	0.672303	0.99582	1.2224	0.780231	1.06171	0.9029	0.836298	0.744203	0.684115
MIA PaCa2	0	Rep1	0.95741	0	1.15087	0.745085	0.661293	0.726875	1.70664	0.926728	0.932089	1.23997	0.526386
MIA PaCa2	0	Rep1	0.388154	0	0.528189	0.962171	0.741868	0.598967	1.22975	1.08487	0.995639	0.77356	0.405174
MIA PaCa2	0	Rep1	0.499172	0	0.344649	0.976364	0.761502	0.610659	1.1267	1.18562	0.909736	0.749994	0.860403
MIA PaCa2	0	Rep1	1.28974	5.36604	0.613163	1.02029	0.703555	0.975316	0.833214	0.987858	0.993948	0.845259	1.3835
MIA PaCa2	0	Rep1	0.779861	0	0.292305	1.05071	0.927714	0.696432	0.929339	1.11264	1.06143	0.750071	0.837768
MIA PaCa2	0	Rep1	0.317274	0	0.409227	1.06976	0.868248	0.545275	0.904136	1.06149	1.03721	1.01019	0.947956
MIA PaCa2	0	Rep1	0.771822	0	0.575094	0.981686	0.839375	0.670747	1.04761	1.04016	0.983859	0.958181	0.936974
MIA PaCa2	0	Rep1	1.44223	9.01893	0.469049	1.16057	1.07066	0.821861	0.606789	1.0376	1.01696	0.791767	0.997982
MIA PaCa2	0	Rep1	0.378478	0	0.3732	1.0984	0.902363	0.674996	0.807181	1.11737	1.09581	0.542176	0.544289
MIA PaCa2	0	Rep1	0.50661	0	0.501678	0.912728	0.80309	0.808137	1.14644	0.998317	1.00478	1.06494	0.845156
MIA PaCa2	0	Rep1	0.872295	1.62683	0.995198	0.930158	0.788255	0.803957	0.847484	0.930863	0.874118	0.874236	0.757775
MIA PaCa2	0	Rep1	1.01737	0	1.01899	0.853464	0.622235	0.854403	1.59842	0.685875	0.868898	1.13264	0.469988
MIA PaCa2	0	Rep1	0.804705	0	0.706971	0.784004	0.792278	0.761135	1.47719	1.14617	1.05536	1.0446	0.636117
MIA PaCa2	0	Rep1	0.663106	0	0.603645	0.960969	0.6933	0.645334	0.756254	0.985932	0.953894	1.0654	0.534862
MIA PaCa2	0	Rep1	0.80932	0	0.357564	0.888552	0.973066	0.801579	1.23732	1.24918	0.984913	0.977442	0.730127
MIA PaCa2	0	Rep1	1.01144	0	0.606365	1.09126	0.618464	0.748749	0.57673	1.13806	0.945105	1.03148	0.517522
MIA PaCa2	0	Rep1	1.75025	0	0.498959	0.605501	0.564646	2.20993	2.7346	0.746561	1.01404	2.3995	1.04274
MIA PaCa2	0	Rep1	0.754736	0	0.351447	1.09012	0.612221	0.960837	0.744887	1.14815	1.04299	0.996139	0.828155
MIA PaCa2	0	Rep1	0.929243	0	0.606365	1.12782	0.612705	0.754704	0.818855	0.753877	1.072	1.06627	0.629709
MIA PaCa2	0	Rep1	1.89295	0	0.545864	1.1914	0.616444	0.506301	0.626196	0.868421	1.02537	1.22454	0.940799
MIA PaCa2	0	Rep1	1.28331	0	1.2304	1.02466	0.565221	1.12635	1.18751	0.758484	0.986392	1.29432	0.878189
MIA PaCa2	0	Rep1	0.652791	0	0.623358	0.970202	0.747557	1.24397	0.963792	1.2258	0.882122	0.935949	0.928731
MIA PaCa2	0	Rep1	1.18025	0	0.49556	0.85122	0.950778	1.39562	1.70194	1.11915	0.922439	1.36298	0.545075
MIA PaCa2	0	Rep1	0.991722	0	0.761354	0.944535	0.424146	0.889266	1.27508	1.00148	0.907376	1.36213	0.387925
MIA PaCa2	0	Rep1	0.850126	0	0.425543	1.13991	0.692165	0.754089	0.753587	1.07317	0.961625	1.0814	0.448052
MIA PaCa2	0	Rep1	0.872127	0	0.938777	0.80051	0.641715	0.898367	1.49877	0.972171	0.945981	1.27434	0.809815
MIA PaCa2	0	Rep1	1.32221	3.37322	0.89799	0.991225	0.816853	1.86673	0.976567	0.572849	1.01115	1.00858	0.786603
MIA PaCa2	0	Rep1	0.779804	0	0.517313	1.11302	0.639651	0.753544	0.821452	1.37968	1.04373	1.09043	0.673364
MIA PaCa2	0	Rep1	1.6419	0	0.472448	1.16554	0.738524	1.72704	0.817149	0.781665	1.07945	1.18426	0.788881
MIA PaCa2	0	Rep1	1.74316	0	0.354846	1.21852	0.621509	0.847921	0.587661	0.912871	1.03791	1.16201	1.01883
MIA PaCa2	0	Rep1	0.51724	0	0.195098	1.17868	1.02258	1.17865	0.844966	1.37659	1.0409	0.831526	0.572651
MIA PaCa2	0	Rep1	1.00068	0	0.669584	0.993401	1.12612	1.51723	1.08622	0.958814	1.00992	0.889966	0.605283
MIA PaCa2	0	Rep1	2.14247	0	0.378638	1.22771	0.665935	2.17475	0.590178	0.792961	1.04419	1.45061	1.17673
MIA PaCa2	0	Rep1	1.08044	0	0.275312	1.09808	0.648911	0.336788	0.839314	1.05438	0.940316	1.50674	0.655303
MIA PaCa2	0	Rep1	0.943098	0	0.429621	1.13108	0.694413	0.497474	0.767422	0.980202	1.01335	1.4115	0.860541
MIA PaCa2	0	Rep1	1.25049	0	0.566937	0.780617	1.6194	1.68408	1.42802	0.833988	0.874513	0.893989	1.13307
MIA PaCa2	0	Rep1	1.24204	0	0.605684	1.15264	0.623196	0.762917	0.672288	0.909456	1.02527	1.19004	0.884562
MIA PaCa2	0	Rep1	1.2113	3.65584	0.942855	1.0459	1.12311	1.64601	0.688906	0.745461	0.890384	1.12222	1.09596
MIA PaCa2	0	Rep1	0.915471	3.3845	0.46293	1.12222	1.00086	1.33882	0.721944	1.0438	0.982289	1.54292	1.1479
MIA PaCa2	0	Rep1	1.5239	0	0.588011	1.05996	0.579747	1.47971	1.02413	0.921261	1.04578	1.46117	1.31649
MIA PaCa2	0	Rep1	1.12284	0	0.538386	1.075	0.433869	1.7968	0.956789	0.915963	0.989453	1.42384	0.779476
MIA PaCa2	0	Rep1	0.950752	0	0.599567	1.01711	0.795502	0.949206	0.750588	0.946485	0.958907	0.978997	0.863374
MIA PaCa2	0	Rep1	0.659497	1.86295	0.700854	0.906197	0.918932	0.535381	1.01524	0.942416	1.01233	0.864843	1.03327
MIA PaCa2	0	Rep1	0.894012	0	1.04822	0.959472	0.723754	0.777771	1.1842	0.888793	0.911314	0.988716	0.749969
MIA PaCa2	0	Rep1	1.44949	0	0.639674	1.03581	0.888007	0.800393	1.00661	0.937434	1.08119	1.12623	1.57495
MIA PaCa2	0	Rep1	0.591631	0	0.513234	0.70067	0.302787	1.03659	1.2848	1.03439	0.890651	1.79094	0.845433
MIA PaCa2	0	Rep1	1.09442	0	0.655308	0.901463	0.40699	1.32682	0.764145	1.01816	0.863558	1.3036	0.691776
MIA PaCa2	0	Rep1	1.08228	2.07888	0.577814	1.08397	0.553022	2.27164	0.956854	0.8876	1.03639	0.935646	1.43702
MIA PaCa2	0	Rep1	1.45674	2.4236	0.43098	1.19685	0.854534	2.92338	0.863731	0.925271	0.952162	1.26207	0.995304
MIA PaCa2	0	Rep1	1.11152	0	0.500999	0.973113	0.669237	1.13986	1.04225	0.770884	0.874149	0.772055	1.0914
MIA PaCa2	0	Rep1	1.6008	0	0.367761	1.13673	0.695097	1.51739	0.754752	0.970249	1.00579	0.94551	0.93087
MIA PaCa2	0	Rep1	0.809487	0	0.907506	0.98933	0.694661	1.42811	1.13307	0.763856	0.936776	1.19894	0.606267
MIA PaCa2	0	Rep1	1.01894	0	0.395633	1.03441	0.743091	1.04845	0.872526	1.17676	1.08258	1.21264	0.968975
MIA PaCa2	0	Rep1	0.834402	0	0.575094	0.991927	1.06772	1.42812	1.0045	1.12347	1.02215	0.883685	0.460774
MIA PaCa2	0	Rep1	1.44154	0	0.487403	1.12823	1.06931	1.51261	0.754495	0.990879	1.01969	1.05695	0.900993
MIA PaCa2	0	Rep1	0.923225	0	0.566937	0.847689	0.824995	1.95311	0.875801	0.828211	0.981786	1.21367	1.03001
MIA PaCa2	0	Rep1	0.65175	0	0.535667	1.04771	0.833974	1.05882	0.83539	1.00676	1.03434	1.02411	0.810908
MIA PaCa2	0	Rep1	0.666212	0	0.567617	1.01576	0.44219	1.19727	0.874752	1.01812	0.940548	1.35962	0.401975
MIA PaCa2	0	Rep1	0.71266	0	0.43098	1.07522	0.654092	1.82716	0.791155	0.928545	0.908535	1.06201	0.863543
MIA PaCa2	0	Rep1	1.04694	0	0.348728	1.10098	1.0336	1.56968	0.766857	1.14014	1.06007	0.806418	1.48196
MIA PaCa2	0	Rep1	1.45539	0	0.882354	0.714848	0.754561	1.57388	2.3087	0.930141	0.970207	1.06086	0.462382
MIA PaCa2	0	Rep1	1.07423	0	0.904107	1.10242	0.474942	0.875852	1.13764	0.84528	1.10344	1.30574	0.712119
MIA PaCa2	0	Rep1	1.07758	0	0.83477	0.972963	0.516765	0.725321	0.9928	0.651265	1.04206	0.846679	0.977472
MIA PaCa2	0	Rep1	0.350825	0	1.57097	0.932164	0.340175	0.325255	0.999127	0.894257	0.825171	0.889468	0.801688
MIA PaCa2	0	Rep1	0.753081	0	1.08221	0.891276	0.417927	0.363099	1.03374	0.657627	0.901365	0.837241	1.11319
MIA PaCa2	0	Rep1	0.275647	1.36334	3.90738	0.885787	0.411386	0.267791	0.939059	1.10676	0.737464	0.905482	1.01492
MIA PaCa2	0	Rep1	0.77436	0	0.632876	1.09547	0.629515	0.968676	0.699062	0.916518	0.900486	0.868941	0.770871
MIA PaCa2	0	Rep1	0.173578	0	3.78638	0.785105	0.257238	0.144601	1.19085	0.947838	0.967769	0.929687	1.10532
MIA PaCa2	0	Rep1	1.64146	4.98462	0.481964	1.067	0.828394	1.45845	0.760085	0.694878	0.884859	1.02383	0.95429
MIA PaCa2	0	Rep1	0.344719	0	3.40502	0.843425	0.309202	0.334558	0.88221	0.853305	0.799266	0.856028	0.592232
MIA PaCa2	0	Rep1	1.27012	3.10912	1.27663	1.00398	0.813476	0.602552	0.820248	0.536046	0.880448	1.00697	0.716888
MIA PaCa2	0	Rep1	1.14575	0	0.347367	1.13152	0.748725	1.11472	0.950763	1.08296	0.898703	1.07431	0.809584
MIA PaCa2	0	Rep1	0.765017	0	0.793304	0.976583	0.381017	0.71336	0.813449	0.727063	0.960671	0.674018	0.643564
MIA PaCa2	0	Rep1	0.924837	0	1.24672	1.01094	0.671301	1.04492	0.687583	0.820979	0.858968	0.930122	0.910983
MIA PaCa2	0	Rep1	1.47217	0	0.444576	1.04156	1.14701	1.25087	0.761256	1.05886	0.881737	0.842617	0.860464
MIA PaCa2	0	Rep1	0.695614	0	0.458172	0.964097	0.680053	0.764319	0.836459	0.998493	1.06485	1.41052	1.02814
MIA PaCa2	0	Rep1	1.01274	0	0.65327	1.05959	0.787967	1.10352	0.800609	0.836905	1.00146	0.74315	0.918556
MIA PaCa2	0	Rep1	0.538941	3.30717	0.615881	1.00235	0.97118	0.853001	0.945295	0.96751	1.01255	1.03569	0.812793
MIA PaCa2	0	Rep1	1.24016	0	0.633555	0.97022	0.883515	1.13882	1.28321	0.894274	0.802509	1.18442	1.05196
MIA PaCa2	0	Rep1	0.712185	0	0.269193	1.0479	0.959453	0.432502	0.724397	1.04657	0.999059	1.06061	0.405484
MIA PaCa2	0	Rep1	0.929641	0	0.573054	0.785926	0.837611	1.25325	1.66504	0.923267	1.00449	0.924265	0.587955
MIA PaCa2	0	Rep1	1.08357	0	0.518673	0.779385	0.743444	1.13211	1.83636	0.824825	0.93433	1.21773	0.448817
MIA PaCa2	0	Rep1	1.12342	3.80916	0.891192	1.02015	0.786781	0.761592	0.815165	0.636763	0.883632	1.09676	0.728601
MIA PaCa2	0	Rep1	0.798257	0	0.831371	0.987193	0.974896	1.29712	0.946355	0.776196	0.93923	0.851458	0.9577
MIA PaCa2	0	Rep1	1.28681	5.65172	0.59141	0.978164	0.75001	0.733959	0.882921	0.828355	0.963114	0.98531	0.6628
MIA PaCa2	0	Rep1	1.97456	0	0.313379	1.20724	0.47919	1.33892	0.699591	0.79724	1.06626	1.22186	1.2188
MIA PaCa2	0	Rep1	0.59013	1.1947	0.568296	0.984831	0.743705	0.598155	0.869243	1.08138	1.00977	0.910843	0.726341
MIA PaCa2	0	Rep1	0.877564	0	0.356885	0.984219	0.673067	0.633777	1.31468	0.819394	0.8735	0.925392	0.445421
MIA PaCa2	0	Rep1	0.529158	0	0.709691	0.804962	0.653988	0.730173	1.50727	1.01391	0.902341	1.26639	0.395058
MIA PaCa2	0	Rep1	0.860234	0	0.273951	1.05925	0.83915	0.452463	0.930913	1.00974	1.06553	0.865814	0.939028
MIA PaCa2	0	Rep1	0.668931	0	0.547223	1.01529	0.817378	0.663174	0.785307	1.11161	0.961796	1.14984	0.677456
MIA PaCa2	0	Rep1	0.812556	0	0.4337	0.954217	1.07846	1.17282	1.36252	0.951629	0.94377	0.948799	1.00548
MIA PaCa2	0	Rep1	0.469273	1.08591	0.577134	0.973709	0.757427	0.726367	1.07272	0.855122	0.989161	1.18667	0.693463
MIA PaCa2	0	Rep1	0.584063	0	0.356885	1.133	0.510027	1.09447	0.656946	1.0859	1.05363	1.38105	0.846426
MIA PaCa2	0	Rep1	0.946959	0	0.52547	0.85675	0.817622	0.906174	1.49727	1.09218	1.00937	1.0094	1.08343
MIA PaCa2	0	Rep1	1.53977	0	0.436419	1.22274	0.625023	0.870068	0.787754	1.05486	0.959979	0.974441	1.08763
MIA PaCa2	0	Rep1	1.54872	4.26216	0.477885	1.11508	0.75405	1.73734	0.826719	0.994485	0.988121	1.28026	1.69382
MIA PaCa2	0	Rep1	1.24254	2.39387	0.698135	1.02837	1.07232	1.01723	1.10638	0.856166	1.00439	1.05373	0.508851
MIA PaCa2	0	Rep1	0.67708	0	0.611123	1.21325	0.634913	0.514345	0.730861	0.82533	0.860142	0.976937	0.664912
MIA PaCa2	0	Rep1	1.10522	0	0.592769	1.10053	0.78671	0.819768	1.0064	1.08407	1.00679	1.00041	0.401482
MIA PaCa2	0	Rep1	0.555434	0	0.505077	1.1106	0.586969	0.364059	0.832984	1.1226	1.02935	0.938798	1.37079
MIA PaCa2	0	Rep1	1.32805	0.452373	0.692696	1.06446	0.89161	1.05024	1.16388	0.586306	0.992448	1.16462	0.956099
MIA PaCa2	0	Rep1	0.588552	0	0.563538	1.01137	0.921094	0.757019	0.866082	0.880602	1.03928	0.896102	0.888741
MIA PaCa2	0	Rep1	0.546471	0	0.209373	1.13398	1.14282	1.02829	0.796776	1.17796	1.0309	0.653664	1.10377
MIA PaCa2	0	Rep1	0.664444	0	0.613842	1.0874	0.789058	1.35763	0.832292	1.24685	0.921697	1.08533	0.738201
MIA PaCa2	0	Rep1	0.945591	0	0.759315	1.10191	0.735196	0.730268	0.757823	0.920486	0.964319	1.06054	0.641186
MIA PaCa2	0	Rep1	0.371104	0	0.450015	1.04922	0.871874	0.986815	0.907978	0.94533	0.852289	0.932556	0.473368
MIA PaCa2	0	Rep1	0.388053	0	0.354846	1.05047	0.634068	0.690128	0.97917	0.998366	0.920316	0.944	0.512103
MIA PaCa2	0	Rep1	0.806407	0	0.912266	0.791938	1.01448	1.0987	1.15775	0.908621	0.919628	1.03729	0.825269
MIA PaCa2	0	Rep1	1.01499	3.63411	1.02035	0.884559	1.08178	0.966665	1.15883	0.862033	0.929785	0.920452	0.71927
MIA PaCa2	0	Rep1	0.96146	0	0.733484	0.76565	0.880999	1.10969	0.844062	0.924316	0.968285	0.995837	0.762321
MIA PaCa2	0	Rep1	0.725206	1.93035	0.811658	1.07274	0.853766	1.6303	0.873518	0.782103	0.974748	0.993597	1.12984
MIA PaCa2	0	Rep1	0.889414	0	0.520032	0.859709	0.674277	0.565504	1.71289	0.909879	1.01677	0.971543	0.687933
MIA PaCa2	0	Rep1	0.471846	0	0.487403	0.896616	0.693995	0.897441	0.962632	1.022	1.01391	1.30733	0.794053
MIA PaCa2	0	Rep1	0.678483	0	0.325614	0.968949	1.3535	1.5523	1.29208	1.0581	0.954862	0.831535	0.963349
MIA PaCa2	0	Rep1	0.716264	0	0.322896	1.11632	1.03211	0.635846	0.789806	1.17751	1.01426	1.19225	0.915924
MIA PaCa2	0	Rep1	0.939325	2.99685	0.575094	0.933085	0.771712	0.983231	1.35632	0.982406	0.973753	1.10002	0.95877
MIA PaCa2	0	Rep1	1.34196	0	0.3732	0.782877	0.73568	0.626556	1.93074	0.973554	0.826934	1.21967	1.28206
MIA PaCa2	0	Rep1	1.07729	0	0.462251	1.09317	1.32193	1.93512	0.922959	1.03519	0.933946	0.965763	1.52086
MIA PaCa2	0	Rep1	0.326071	0	0.469049	0.914237	0.845769	0.46121	0.793632	1.0861	0.987456	0.872899	0.336302
MIA PaCa2	0	Rep1	0.646438	0	0.487403	1.08727	0.934985	1.29969	1.07132	1.01386	0.986666	0.729901	0.759103
MIA PaCa2	0	Rep1	0.818515	0	0.658707	0.97428	1.09524	1.38537	0.850896	0.904569	1.0649	1.02022	1.5662
MIA PaCa2	0	Rep1	1.02048	0	0.321536	1.13094	0.856009	2.02179	0.670449	1.0284	0.94274	1.18813	1.38946
MIA PaCa2	0	Rep1	0.818987	0	0.600926	1.07376	0.840702	0.879093	0.845022	1.04589	1.04539	0.983541	0.761244
MIA PaCa2	0	Rep1	1.22651	0	0.49692	0.95766	0.770386	0.958275	1.37234	0.95154	0.992649	1.19367	0.77011
MIA PaCa2	0	Rep1	0.646674	2.79374	0.785147	1.01435	0.955312	0.728733	0.666134	0.973692	0.984723	1.08445	0.508869
MIA PaCa2	0	Rep1	0.672399	0	0.486044	1.11243	1.26467	0.98162	0.793712	1.03831	0.939102	0.746701	1.08916
MIA PaCa2	0	Rep1	1.26111	0	0.5547	1.00178	0.988991	1.35963	1.09934	1.0664	0.955648	1.37153	0.86586
MIA PaCa2	0	Rep1	1.12036	0	0.331733	1.05258	1.1843	1.0683	0.656637	1.05373	0.965762	0.784234	1.11701
MIA PaCa2	0	Rep1	1.93475	0	0.726686	0.711479	0.700389	2.59268	2.25612	0.555872	0.964601	1.30897	0.976248
MIA PaCa2	0	Rep1	0.527597	0	0.593448	0.990242	0.817338	0.743739	1.03184	1.06211	0.919432	0.868074	0.619135
MIA PaCa2	0	Rep1	0.14232	0	2.81362	0.818305	0.330124	0.21814	1.30701	0.977815	0.910902	0.870031	0.412778
MIA PaCa2	0	Rep1	0.6774	0	0.459531	1.1173	0.847859	1.13232	0.804549	1.07881	0.858396	0.897468	0.718216
MIA PaCa2	0	Rep1	0.366749	0	0.594128	1.00115	0.575189	0.744569	1.35555	1.06929	1.02196	0.933055	0.607788
MIA PaCa2	0	Rep1	0.29942	0	2.32009	0.699765	0.389457	0.2442	1.42897	0.740447	0.794087	0.824879	0.555806
MIA PaCa2	0	Rep1	0.583453	0	0.789905	0.949256	0.488518	0.440295	0.88259	1.06927	0.871858	0.958248	0.924252
MIA PaCa2	0	Rep1	0.785156	0	0.647831	1.04366	0.84645	1.09627	1.07963	0.862482	1.0149	0.938976	0.957823
MIA PaCa2	0	Rep1	0.49591	0	0.724646	1.04139	0.624086	0.578148	0.888576	1.17476	0.956392	0.794757	0.607551
MIA PaCa2	0	Rep1	0.586857	0.601393	0.694736	0.951199	0.533008	0.438317	0.80677	0.825293	0.893304	0.994395	0.784879
MIA PaCa2	0	Rep1	0.535924	0	0.554021	1.03407	0.674784	0.786897	1.10323	1.11946	0.939477	0.690537	0.522168
MIA PaCa2	0	Rep1	1.05103	0	0.973446	1.1022	0.686728	1.02198	0.669284	0.809296	0.860023	1.03933	0.601161
MIA PaCa2	0	Rep1	0.214747	0	2.10119	0.791942	0.295419	0.197256	1.30692	0.981543	0.919718	0.923056	1.34448
MIA PaCa2	0	Rep1	0.315064	0	1.04958	0.960213	0.416664	0.311619	0.768133	0.890675	0.969433	0.761248	0.564193
MIA PaCa2	0	Rep1	0.575613	1.855	0.675702	0.952766	0.944158	1.08663	1.08806	1.0596	0.970767	0.79206	0.730949
MIA PaCa2	0	Rep1	0.528485	0	0.37184	1.05113	1.11359	0.672028	0.867728	1.2388	0.909971	0.763821	0.461575
MIA PaCa2	0	Rep1	0.401599	1.25055	2.58928	0.728641	0.443941	0.277292	0.964682	0.623887	0.83795	0.819016	0.907104
MIA PaCa2	0	Rep1	1.21645	0	0.536346	1.16485	0.534023	0.789072	0.635732	0.806931	1.00477	1.13592	0.88079
MIA PaCa2	0	Rep1	0.646689	0	0.548583	1.1124	0.737723	0.807915	0.823941	0.991848	0.912241	1.05598	0.564788
MIA PaCa2	0	Rep1	0.321589	0	2.27727	0.768925	0.44039	0.280914	1.25376	0.696209	0.884344	0.917286	0.396297
MIA PaCa2	0	Rep1	0.82237	0	0.536346	0.90309	0.763693	0.806913	1.23416	0.988022	0.934103	0.770185	1.2698
MIA PaCa2	0	Rep1	1.82952	2.0625	0.506436	1.126	0.441731	1.53932	0.866359	0.933786	1.05993	1.34948	1.32298
MIA PaCa2	0	Rep1	0.858168	5.39642	0.367761	0.951303	1.05891	0.797856	1.10722	1.10427	0.912241	1.23207	0.915755
MIA PaCa2	0	Rep1	0.597504	0	0.563538	1.0562	0.722914	0.619627	0.74057	0.997761	0.960671	0.995165	0.97828
MIA PaCa2	0	Rep1	0.53251	0	0.475847	1.11224	0.762258	0.788609	0.782887	0.913171	0.939515	1.31459	0.772495
MIA PaCa2	0	Rep1	0.515841	0	0.267834	0.995466	1.176	1.02476	0.783836	1.04374	0.939515	0.859926	0.632609
MIA PaCa2	0	Rep1	1.65953	0	0.243362	1.00074	0.863031	0.566725	1.06066	0.954294	0.907216	0.714488	1.58506
MIA PaCa2	0	Rep1	0.791509	1.04174	0.40107	1.10025	0.767527	0.904119	0.793245	0.97748	1.03186	1.04101	1.03943
MIA PaCa2	0	Rep1	0.696326	0	0.52547	0.882786	1.07177	0.940155	0.829078	1.02732	0.97639	1.0306	1.38792
MIA PaCa2	0	Rep1	0.961732	0	0.508476	1.07577	1.35372	0.825147	0.654506	0.930423	1.00401	0.750744	0.966851
MIA PaCa2	0	Rep1	1.24139	0	0.427583	1.15881	0.906909	0.75922	0.686724	0.96216	0.98817	1.18773	0.788173
MIA PaCa2	0	Rep1	0.822609	0	0.367761	1.13673	1.05914	0.645315	0.892677	0.953563	1.02462	0.873332	1.07466
MIA PaCa2	0	Rep1	0.69112	0	0.590729	0.948444	1.39082	1.0297	1.1568	0.896684	1.00261	0.784591	1.13201
MIA PaCa2	0	Rep1	0.936906	0	0.560819	1.18145	1.02017	0.999721	0.725569	0.884651	0.989181	0.833559	1.34595
MIA PaCa2	0	Rep1	1.53476	0	0.638994	1.03515	0.685465	1.28542	0.992248	0.70096	1.01165	1.37525	0.881806
MIA PaCa2	0	Rep1	0.814893	0	0.366402	1.05625	0.910751	0.974536	0.677567	1.1682	0.925928	0.799636	0.627627
MIA PaCa2	0	Rep1	0.674783	0	0.275991	0.771986	1.3727	1.03892	1.51113	1.02459	1.08363	0.880455	1.00973
MIA PaCa2	0	Rep1	0.277356	0	0.216851	1.01544	1.11606	0.660758	0.890154	1.05034	0.98871	1.02239	1.21332
MIA PaCa2	0	Rep1	0.804151	5.60789	0.651909	1.11481	0.842718	0.556588	0.733116	0.89004	0.9729	0.813682	1.2001
MIA PaCa2	0	Rep1	0.775458	0	0.553341	1.14458	0.801181	1.18348	0.662041	0.992897	0.913717	1.32903	0.924405
MIA PaCa2	0	Rep1	0.70868	2.19028	0.619959	1.02704	0.886871	0.714894	0.847714	0.873554	0.939704	1.0173	1.08636
MIA PaCa2	0	Rep1	0.971963	4.91034	0.691337	0.914744	1.33733	0.9553	1.09647	0.881255	1.03974	0.916944	1.55944
MIA PaCa2	0	Rep1	0.385673	0	0.324935	1.19376	0.928425	0.439612	0.735416	0.993646	1.03771	0.508934	0.781177
MIA PaCa2	0	Rep1	0.906504	0	0.585971	0.943792	0.496845	1.03803	1.29892	1.0229	0.987164	1.35599	1.37139
MIA PaCa2	0	Rep1	1.14865	0	0.420104	1.10125	0.956744	0.666675	0.773403	1.02722	0.967248	0.849804	1.05941
MIA PaCa2	0	Rep1	0.745715	0	0.655988	0.918671	1.09933	0.915649	1.17059	0.918703	1.03833	1.12425	1.12685
MIA PaCa2	0	Rep1	0.555504	3.46842	1.0992	0.869568	1.35367	1.03957	1.25105	1.04266	0.770348	0.944846	0.955629
MIA PaCa2	0	Rep1	0.587264	0	0.496239	1.02371	1.13034	0.787233	0.745034	0.972453	1.04373	0.833882	1.42334
MIA PaCa2	0	Rep1	1.0918	1.27719	0.531588	1.10464	1.09619	1.00108	0.754864	1.09559	0.991543	1.05817	1.20757
MIA PaCa2	0	Rep1	0.321148	2.17408	1.63351	0.764747	0.391933	0.255879	1.14856	0.774024	1.0293	0.921371	1.05753
MIA PaCa2	0	Rep1	0.882364	2.53369	0.638994	0.994529	1.32334	1.32377	0.908899	0.988894	0.817621	0.722474	1.20257
MIA PaCa2	0	Rep1	1.20035	0	0.526151	1.02493	0.707422	1.00353	0.720355	0.85238	1.05497	1.33118	0.839384
MIA PaCa2	0	Rep1	0.954958	0	0.492161	0.941671	1.04767	0.852234	1.0352	0.778814	0.937672	0.961657	0.890272
MIA PaCa2	0	Rep1	0.969808	0	0.640353	1.06888	0.878553	0.960514	0.935133	0.637526	1.01988	1.17217	0.833812
MIA PaCa2	0	Rep1	1.02283	1.32571	0.827292	0.959634	0.782042	0.761852	1.10668	0.888134	0.894128	1.11088	0.847511
MIA PaCa2	0	Rep1	1.10428	0	0.354165	1.00648	1.34681	0.682372	0.844195	1.00113	1.03387	1.00429	1.09517
MIA PaCa2	0	Rep1	1.78834	3.98761	0.392913	1.05776	0.733122	1.26991	0.755207	0.882183	1.04266	1.37899	0.886693
MIA PaCa2	0	Rep1	1.03101	0	0.423503	1.06396	0.751599	0.841655	1.10721	0.842296	1.07601	1.45153	1.28409
MIA PaCa2	0	Rep1	0.861522	0	0.757955	0.97564	1.00586	1.20825	1.16963	1.06386	1.03287	1.00043	0.838337
MIA PaCa2	0	Rep1	1.56986	0	0.375239	1.18492	0.825112	1.33865	0.750977	0.983738	1.07136	1.08961	1.19896
MIA PaCa2	0	Rep1	1.11857	0	0.266474	1.13285	0.605638	0.369617	0.766686	1.10892	1.04751	1.03388	0.586534
MIA PaCa2	0	Rep1	0.874362	0	0.416025	1.00045	0.472863	0.998731	1.12847	0.759868	0.961265	1.23794	1.06141
MIA PaCa2	0	Rep1	1.20228	0	0.43098	0.961875	0.666541	0.968289	0.787885	0.680081	0.978624	1.29326	1.28522
MIA PaCa2	0	Rep1	0.814213	0	0.389514	0.973098	0.983449	0.848974	1.04178	1.06348	0.942418	0.771194	0.955014
MIA PaCa2	0	Rep1	1.54081	0	0.254918	0.996726	0.831245	1.18246	1.04906	0.847963	0.972398	1.23149	1.10831
MIA PaCa2	0	Rep1	1.1467	0	0.193058	1.10045	0.465479	0.659978	0.900601	0.837727	0.984597	0.312663	1.07694
MIA PaCa2	0	Rep1	1.4997	0	0.206654	1.04123	0.824484	0.793683	0.868623	1.00027	0.788522	1.23378	0.8699
MIA PaCa2	0	Rep1	1.94485	0	0.4337	1.25342	0.494624	3.06288	0.647798	0.796028	1.0489	1.25019	1.49356
MIA PaCa2	0	Rep1	1.30253	0	1.00947	1.04518	0.796252	1.51689	1.3268	0.651487	1.02606	0.945055	0.912976
MIA PaCa2	0	Rep1	1.04006	0	0.243362	1.01772	0.57484	1.12639	0.947186	0.759072	0.91316	0.971646	1.06887
MIA PaCa2	0	Rep1	0.209405	0.471458	2.65862	0.854594	0.249188	0.202329	1.02527	1.20971	1.00478	0.763325	1.16129
MIA PaCa2	0	Rep1	1.24562	0	0.800102	0.94055	0.810676	0.816134	1.24608	0.875173	1.05459	1.39774	1.09105
MIA PaCa2	0	Rep1	1.1139	2.34752	0.489443	1.08999	0.973078	0.926317	0.774958	0.896835	1.04366	0.955872	1.16434
MIA PaCa2	0	Rep1	1.09041	3.06666	0.970727	1.04656	0.83939	1.20885	0.868848	0.635104	1.05377	1.03648	1.58934
MIA PaCa2	0	Rep1	0.756795	0	0.944895	0.838223	0.996782	1.08579	1.33637	1.04125	0.737574	0.867745	1.08457
MIA PaCa2	0	Rep1	0.997808	0	0.793983	0.710829	0.474228	0.571472	1.14992	0.679819	0.863889	0.810813	1.04334
MIA PaCa2	0	Rep1	0.854035	0	0.453414	1.01612	0.984373	0.78502	0.748905	1.10845	0.93782	1.03533	1.12286
MIA PaCa2	0	Rep1	0.634946	0	0.679781	0.956235	0.514134	0.79133	0.97541	1.07569	0.911407	1.03295	0.468805
MIA PaCa2	0	Rep1	0.855174	0	0.528869	1.16946	0.47088	0.616999	0.695871	0.643924	0.955648	0.793742	1.22652
MIA PaCa2	0	Rep1	0.621734	0	0.579173	1.11001	0.71891	0.940866	0.765341	0.873933	0.924296	0.655798	0.91938
MIA PaCa2	0	Rep1	0.72405	0	0.52955	1.07674	0.518519	0.936566	0.669435	0.903365	0.913084	0.764459	1.04909
MIA PaCa2	0	Rep1	1.73727	0	0.471768	1.2449	0.52921	1.291	0.595527	0.534212	1.03653	0.722761	1.0612
MIA PaCa2	0	Rep1	0.330949	0	1.60904	0.781052	0.32307	0.186894	1.10719	1.01025	0.858033	0.88153	0.86382
MIA PaCa2	0	Rep1	0.727823	0	1.13115	1.01122	0.81182	1.12386	0.765801	0.762577	0.814049	0.76363	0.893589
MIA PaCa2	0	Rep1	1.76847	0	0.541785	1.1577	0.615997	1.74613	0.884211	0.908528	0.779178	0.946047	0.611193
MIA PaCa2	0	Rep1	1.54215	0	0.501678	1.13355	0.645373	1.46485	0.649894	0.877595	0.846017	0.883357	0.767334
MIA PaCa2	0	Rep1	1.03395	0	0.779708	1.0193	0.677292	1.35111	1.167	0.720974	1.07656	0.868805	0.698157
MIA PaCa2	0	Rep1	0.933138	0	0.483324	1.0688	0.634767	0.66665	0.947434	1.06222	0.998426	0.899965	0.870662
MIA PaCa2	0	Rep1	0.901944	0	0.728045	0.969564	0.655275	0.571248	1.22775	0.857207	1.05266	0.94882	0.393833
MIA PaCa2	0	Rep1	1.10007	3.39269	0.477206	0.999778	1.09343	1.03483	1.02336	0.748658	1.00202	0.789605	1.0082
MIA PaCa2	0	Rep1	0.675507	0	0.37116	1.12653	0.655278	0.607612	0.869317	0.933276	0.981541	0.70506	1.03299
MIA PaCa2	0	Rep1	0.783878	0	0.549942	1.14043	0.587564	0.425395	0.76349	0.910212	1.00529	0.820221	0.950357
MIA PaCa2	0	Rep1	0.89765	0	0.68114	1.02323	0.518605	1.13287	1.25272	0.653403	1.01433	1.2115	0.870831
MIA PaCa2	0	Rep1	0.757623	0	0.696095	1.01676	0.514022	0.653934	1.05659	0.932719	0.956315	1.01298	0.684298
MIA PaCa2	0	Rep1	1.06943	2.33089	1.14271	0.75516	0.70104	1.03083	1.92202	0.864834	0.84173	1.33038	0.77472
MIA PaCa2	0	Rep1	0.947471	0	0.849726	1.0087	0.894649	0.575524	0.734895	0.905226	0.931394	1.11564	0.539826
MIA PaCa2	0	Rep1	1.19924	0	0.982283	0.852265	0.416515	1.15245	1.28436	0.820588	0.956793	1.06607	0.760818
MIA PaCa2	0	Rep1	0.809646	0	1.22496	1.13385	0.61656	0.90495	0.768576	0.972394	0.786513	0.884995	0.871385
MIA PaCa2	0	Rep1	0.941083	0	0.629477	1.11567	0.898918	0.711616	0.838927	0.894471	0.970559	0.855025	0.96495
MIA PaCa2	0	Rep1	0.97625	0	0.83477	1.02438	0.463104	0.678877	1.27535	0.788597	1.04851	1.03276	0.688247
MIA PaCa2	0	Rep1	0.742216	0	0.700173	0.882293	0.877678	0.944569	0.931304	1.03028	1.00671	0.96791	0.270084
MIA PaCa2	0	Rep1	1.11895	0	0.622679	1.14559	0.614016	0.875935	0.674305	0.56294	0.917128	0.643838	1.11172
MIA PaCa2	0	Rep1	0.325417	0	1.24876	0.896777	0.297662	0.295089	0.992231	1.01348	0.924097	0.892802	0.959785
MIA PaCa2	0	Rep1	0.962006	0	0.473807	1.16752	0.515631	1.01234	0.833836	0.891705	0.943014	1.35702	0.629235
MIA PaCa2	0	Rep1	0.616985	0	0.330374	1.16772	0.925058	1.33651	0.655927	1.12673	1.00097	0.892847	0.68931
MIA PaCa2	0	Rep1	1.12692	0	0.766113	1.03672	0.776932	1.56027	0.771698	0.692219	0.929012	0.968884	0.999922
MIA PaCa2	0	Rep1	1.16117	0	0.262395	0.937885	0.636531	0.555434	1.13944	0.987929	0.934287	1.072	0.447012
MIA PaCa2	0	Rep1	1.17851	0	0.350087	0.985835	0.425665	0.550934	1.03434	0.957541	1.05446	1.00905	0.344857
MIA PaCa2	0	Rep1	1.40329	1.80772	0.635595	1.13429	0.772891	1.2068	0.835728	0.672088	1.04088	1.33918	1.2914
MIA PaCa2	0	Rep1	1.68529	4.35972	0.539066	1.21232	0.482103	1.28482	0.870376	0.629555	1.00522	1.09495	1.66877
MIA PaCa2	0	Rep1	0.739115	0	0.291626	1.08294	0.648259	1.16512	0.835842	1.07578	1.00984	1.20739	0.760901
MIA PaCa2	0	Rep1	0.600566	0	0.599567	0.861392	1.20792	1.621	1.29062	0.968094	0.987268	1.0332	1.00846
MIA PaCa2	0	Rep1	1.12687	0	0.358244	1.05657	1.92257	1.70919	0.695356	0.979853	0.907096	0.900645	0.601388
MIA PaCa2	0	Rep1	0.854211	0	0.508476	1.0154	0.886495	1.52385	0.897798	0.91206	1.02465	1.00121	0.840262
MIA PaCa2	0	Rep1	0.500556	0	0.379997	1.09491	1.0581	1.08696	0.766044	1.13645	1.02374	0.813054	1.05656
MIA PaCa2	0	Rep1	1.09585	0	0.667544	0.820919	0.623846	1.72818	1.98321	1.0351	0.944324	1.62887	0.676598
MIA PaCa2	0	Rep1	1.33832	0	0.352806	0.99054	1.83579	1.30306	0.94729	0.953422	0.984723	1.19831	0.90401
MIA PaCa2	0	Rep1	0.366726	0	0.6186	0.947049	0.969684	1.38207	0.942507	1.30702	0.903468	0.95966	0.995089
MIA PaCa2	0	Rep1	1.37036	0	0.273951	0.907639	1.25737	1.15447	1.43597	0.922523	1.03703	1.26818	1.51608
MIA PaCa2	0	Rep1	1.58431	0	0.540426	1.14221	0.569807	1.76977	1.00324	0.8998	0.920096	1.10612	1.20051
MIA PaCa2	0	Rep1	0.86261	0	0.374559	1.10081	0.925176	1.02902	0.910331	1.0755	0.982289	0.722615	1.37814
MIA PaCa2	0	Rep1	1.33124	0	0.58665	1.18461	0.909486	2.22948	0.765672	0.88846	0.910586	1.0471	0.735391
MIA PaCa2	0	Rep1	1.441	0	0.462251	1.01584	0.481768	2.01097	1.08328	0.781403	0.935415	1.28946	1.36252
MIA PaCa2	0	Rep1	1.70824	0	0.231126	1.20438	0.75377	0.936553	0.71447	0.817914	1.08639	0.39273	0.851175
MIA PaCa2	0	Rep1	0.155776	0	2.01623	0.738813	0.250111	0.187932	1.22503	1.10794	0.969904	0.915264	0.523071
MIA PaCa2	0	Rep1	1.29832	0	0.668225	1.20723	0.703306	1.20051	0.662082	0.73342	0.947542	1.04922	0.690437
MIA PaCa2	0	Rep1	0.326546	0	1.9564	0.861421	0.300251	0.201109	1.09137	0.972962	0.924603	0.923988	0.902271
MIA PaCa2	0	Rep1	1.05642	0	0.560819	1.03037	0.556746	0.435567	0.692406	0.9073	0.941109	0.740533	1.08575
MIA PaCa2	0	Rep1	0.223207	1.91694	4.16841	0.74962	0.321666	0.173871	1.23659	1.05033	0.849056	0.887659	1.19473
MIA PaCa2	0	Rep1	0.134428	0	2.52063	0.898888	0.238674	0.118206	1.07871	0.996855	0.898795	0.873038	0.767192
MIA PaCa2	0	Rep1	0.590535	0.261914	1.19641	0.986681	0.704271	0.764465	0.84533	0.898463	0.85938	0.862028	0.995266
MIA PaCa2	0	Rep1	1.10178	0.350173	0.745719	1.15724	0.704509	0.61529	0.774663	0.61974	0.820251	0.826991	0.870677
MIA PaCa2	0	Rep1	1.34738	0	0.391554	1.13051	1.1428	0.980003	0.640521	0.910831	0.774547	0.686797	0.621096
MIA PaCa2	0	Rep1	0.917856	0	0.602966	0.932428	0.551097	0.46749	0.712708	0.851626	0.888165	0.952163	0.668582
MIA PaCa2	0	Rep1	0.959617	5.00303	0.908187	1.03162	0.566294	0.738278	0.998493	0.682878	0.786114	0.912163	0.780584
MIA PaCa2	0	Rep1	0.817609	0	0.272592	0.891659	0.794171	0.800146	1.01826	1.08989	0.935415	0.859397	0.605704
MIA PaCa2	0	Rep1	1.53311	6.4087	0.684539	1.18468	0.663901	0.987373	0.684998	0.661133	0.95582	1.20291	1.13976
MIA PaCa2	0	Rep1	0.836739	0	0.672303	0.817646	0.620511	0.657187	1.69336	1.0714	0.936776	1.18394	0.506701
MIA PaCa2	0	Rep1	0.806094	0	0.459531	1.03684	0.786053	0.780853	0.767755	1.06447	0.870425	0.864113	0.703418
MIA PaCa2	0	Rep1	0.930248	0	0.449334	1.10244	0.829349	0.785204	1.06613	1.22516	0.960134	0.976436	0.517509
MIA PaCa2	0	Rep1	0.591029	0	0.530229	1.10296	0.636145	1.01003	0.718534	1.03355	0.986261	0.760574	0.763615
MIA PaCa2	0	Rep1	0.571969	0	0.43302	1.10668	0.764884	0.736788	0.818666	1.2042	0.989432	0.92586	0.757976
MIA PaCa2	0	Rep1	0.491699	0	0.286188	1.03715	1.26004	0.832117	0.934436	1.03781	0.987828	0.802453	0.978541
MIA PaCa2	0	Rep1	1.0595	0	0.424184	1.13774	0.634209	1.57061	0.941349	0.758374	0.916112	1.08228	1.00171
MIA PaCa2	0	Rep1	0.718125	3.33654	0.594807	1.01225	0.542433	0.822356	0.951782	1.00479	0.954224	1.49253	1.15789
MIA PaCa2	0	Rep1	0.871932	0	0.65327	0.997966	0.73522	1.03375	1.25095	0.754633	0.842307	0.826054	0.907466
MIA PaCa2	0	Rep1	0.617697	0	0.237243	1.17724	1.26662	1.07808	0.70436	1.07424	0.957914	0.403977	1.10904
MIA PaCa2	0	Rep1	0.74934	0	0.343289	1.12351	1.09638	0.826313	0.742887	1.15518	1.03954	0.892469	0.852391
MIA PaCa2	0	Rep1	1.36453	0	0.40379	1.10472	1.04487	0.899045	0.676941	0.937042	1.0659	1.11971	1.21363
MIA PaCa2	0	Rep1	0.983289	0	0.749118	1.00436	0.5827	0.457585	1.05215	0.719599	0.866113	0.81575	0.556226
MIA PaCa2	0	Rep1	0.831408	0	0.773591	0.996467	0.935183	0.891181	0.992636	1.0573	0.971652	1.1116	1.05941
MIA PaCa2	0	Rep1	1.21918	0	0.452733	1.16684	0.789734	1.39095	0.759366	0.838537	1.04871	1.16709	1.05961
MIA PaCa2	0	Rep1	1.17216	0	0.31202	1.09339	0.810919	0.391311	0.723411	0.958062	0.994714	0.798219	0.867168
MIA PaCa2	0	Rep1	1.03602	0	0.489443	1.17483	0.585306	0.942489	0.778412	0.657365	0.994048	1.18015	1.06856
MIA PaCa2	0	Rep1	0.539225	0	0.25016	1.05299	0.38468	0.296575	0.687143	0.89316	0.960704	0.557723	0.670126
MIA PaCa2	0	Rep1	0.462265	0.497499	0.734843	0.842759	0.307819	0.16353	1.35674	0.728196	0.936387	0.757768	1.17451
MIA PaCa2	0	Rep1	0.658127	0	0.459531	1.04955	0.810031	0.934619	0.833984	0.944751	1.00599	1.05461	0.942869
MIA PaCa2	0	Rep1	0.980521	0	0.655988	1.05147	1.15207	1.31858	0.904254	0.709277	0.991408	1.03773	0.848343
MIA PaCa2	0	Rep1	1.00335	0	0.31134	1.07521	0.560358	1.25881	0.930451	0.86508	0.944655	1.27671	0.759265
MIA PaCa2	0	Rep1	1.19473	3.43676	0.471087	1.06534	0.739844	0.991641	0.806347	1.07065	0.927141	1.08598	1.1283
MIA PaCa2	0	Rep1	0.473018	1.25473	1.08221	0.992461	0.421319	0.302513	0.962657	0.917401	0.946384	0.948276	1.11788
MIA PaCa2	0	Rep1	1.33674	0	0.404469	0.983382	0.958935	0.687839	1.09034	0.859142	0.942665	1.52943	0.809646
MIA PaCa2	0	Rep1	1.11823	0	0.573054	1.00021	0.947689	0.761655	0.875302	0.887634	0.994109	1.29756	1.25987
MIA PaCa2	0	Rep1	1.00996	0	0.43302	1.09232	0.852453	0.600617	0.95012	0.94447	0.941231	1.06815	0.742622
MIA PaCa2	0	Rep1	1.16192	1.80015	0.812337	1.00794	0.605594	1.06532	0.910945	0.675347	0.96503	1.07424	1.27263
MIA PaCa2	0	Rep1	0.497165	0	0.386795	1.06197	1.10303	0.860422	1.0032	1.14727	1.06833	0.752652	1.12527
MIA PaCa2	0	Rep1	0.982782	0	0.348048	1.06817	0.590136	0.926837	0.880895	0.974061	1.04366	1.3803	1.32206
MIA PaCa2	0	Rep1	0.56998	2.24206	0.698814	0.990567	1.0664	0.733096	1.18112	1.14598	1.05202	1.02211	0.903456
MIA PaCa2	0	Rep1	0.693854	0	0.577814	0.964493	0.812728	0.785533	1.00123	1.12726	0.951639	0.960345	0.84815
MIA PaCa2	0	Rep1	0.309406	0	0.318818	0.930224	0.668293	0.62361	1.06508	1.16435	0.990841	1.11359	0.775266
MIA PaCa2	0	Rep1	0.935919	0	0.513914	0.988269	0.857555	0.908743	1.03361	1.07126	1.08981	1.20244	0.995212
MIA PaCa2	0	Rep1	0.328891	0	0.225687	1.12051	0.762591	0.742445	0.71046	1.11483	1.03609	1.05626	0.649818
MIA PaCa2	0	Rep1	1.12083	0	0.356885	1.08451	0.645624	0.576671	0.730378	1.16475	1.01257	0.60037	1.57601
MIA PaCa2	0	Rep1	0.531757	0	0.298424	1.13428	0.952282	0.794355	0.850797	1.14399	1.0558	0.885007	0.903056
MIA PaCa2	0	Rep1	0.683471	3.23713	0.484004	1.08274	1.02916	1.25707	0.859353	1.26532	1.05735	1.13634	0.763231
MIA PaCa2	0	Rep1	0.581905	0	0.617241	1.00368	0.757821	0.795713	1.03087	1.08959	1.03088	1.21272	0.617245
MIA PaCa2	0	Rep1	1.41796	0	0.46497	0.961714	0.617398	0.962968	0.880593	0.844591	0.917714	1.21769	0.719365
MIA PaCa2	0	Rep1	0.882281	0	0.455453	1.00675	1.07196	0.855056	1.01469	0.943385	0.993114	0.954212	1.28653
MIA PaCa2	0	Rep1	1.01806	0	0.379997	1.14252	1.14129	0.906339	0.786067	1.00757	1.08706	1.02874	1.19872
MIA PaCa2	0	Rep1	0.995006	0	0.660747	0.84407	0.756167	0.894498	1.51188	0.907679	0.972006	1.12042	0.701137
MIA PaCa2	0	Rep1	1.314	0	0.398351	1.08101	1.25062	0.986618	0.765412	1.10973	0.943672	1.05172	1.23554
MIA PaCa2	0	Rep1	1.29564	0	0.431661	0.97438	0.726588	1.04035	0.796437	1.06321	1.03008	1.04644	0.977364
MIA PaCa2	0	Rep1	0.699758	0	0.753876	0.999033	0.805761	0.829345	1.11391	0.911786	0.893358	1.16653	0.732339
MIA PaCa2	0	Rep1	1.06882	0	0.421464	1.10338	0.920245	0.831622	0.623145	1.21914	1.0648	1.39845	1.24896
MIA PaCa2	0	Rep1	0.448828	0	0.514593	1.05846	0.572109	0.637222	0.719009	1.21059	1.02177	0.94069	0.539622
MIA PaCa2	0	Rep1	0.591133	2.55384	1.227	0.688609	0.527535	0.268945	1.22409	0.756293	0.974178	0.915932	0.840785
MIA PaCa2	0	Rep1	0.725019	0	0.502358	1.16309	0.564664	1.07126	0.642283	0.9414	0.987957	0.87767	0.627972
MIA PaCa2	0	Rep1	0.122548	0	0.269873	1.04953	0.483425	0.371524	1.06297	0.931478	1.03783	0.908736	0.49467
MIA PaCa2	0	Rep1	1.13436	0	0.437099	1.04386	0.606387	1.16157	0.976068	1.04839	1.05532	1.31307	1.16108
MIA PaCa2	0	Rep1	0.900036	1.23304	0.550622	0.927117	0.985538	0.571253	0.984658	0.957407	1.03797	0.854213	0.338862
MIA PaCa2	0	Rep1	0.672649	0	0.304542	1.29356	0.930981	0.881947	0.678252	1.08813	1.0648	0.962831	1.35152
MIA PaCa2	0	Rep1	0.568445	0	0.602286	1.11096	0.53274	0.550014	0.775272	0.980691	0.931318	1.21725	0.65521
MIA PaCa2	0	Rep1	1.85719	4.77413	0.590729	1.06288	0.861099	1.37144	1.13819	0.668027	0.989432	1.08884	1.31185
MIA PaCa2	0	Rep1	0.913389	0	0.24948	0.937185	0.996348	1.20136	1.27638	1.23742	0.96943	1.08189	1.35314
MIA PaCa2	0	Rep1	0.970542	0.972507	0.698135	0.954005	1.00423	0.974593	1.21294	0.943811	0.999824	1.11952	0.797385
MIA PaCa2	0	Rep1	1.02383	0	0.634235	1.19766	0.723248	0.546619	0.974811	0.907199	0.974178	0.842858	0.753711
MIA PaCa2	0	Rep1	1.31569	0	0.687258	0.815221	0.948021	1.15326	1.19933	1.03196	0.952547	1.25997	0.588785
MIA PaCa2	0	Rep1	0.988037	2.89038	0.560139	0.956219	0.793931	0.858842	1.00063	0.799306	0.882282	1.14534	0.358036
MIA PaCa2	0	Rep1	1.21158	0	0.406509	0.774637	0.725042	1.3048	1.69213	1.0172	0.873544	1.08609	1.19494
MIA PaCa2	0	Rep1	1.38916	0	0.763394	0.651477	0.442972	1.04277	3.05239	0.987248	0.911407	1.6327	0.601047
MIA PaCa2	0	Rep1	1.03492	0	0.658707	1.21064	0.471544	1.11888	0.709294	0.553331	0.960428	0.798139	0.821282
MIA PaCa2	0	Rep1	0.641073	0	1.07133	1.04863	0.542944	0.55176	0.959805	1.11254	0.867582	1.1954	0.776913
MIA PaCa2	0	Rep1	0.542753	2.64264	1.36364	0.872034	0.304725	0.31047	1.15083	1.1342	0.846459	0.714208	1.13335
MIA PaCa2	0	Rep1	0.798172	0	0.455453	1.07004	0.916504	0.688625	0.665737	1.074	0.954386	0.963534	0.743189
MIA PaCa2	0	Rep1	0.945022	6.8646	1.50639	0.903877	1.09188	1.17105	1.03579	0.596666	0.907003	0.9943	1.64818
MIA PaCa2	0	Rep1	0.916968	0	0.794663	0.870046	0.814132	0.652938	0.903546	0.859429	1.04235	0.923922	1.06736
MIA PaCa2	0	Rep1	0.381754	0	2.15694	0.861823	0.305903	0.193278	0.953714	0.87777	0.923104	0.801496	0.8836
MIA PaCa2	0	Rep1	1.37719	3.91041	0.68114	1.16857	0.747702	2.39855	0.763298	0.526483	0.943044	1.06685	1.37591
MIA PaCa2	0	Rep1	0.573724	0	0.974126	0.781014	0.352409	0.35902	1.71978	0.701168	0.999694	0.88697	0.668699
MIA PaCa2	0	Rep1	0.172792	1.43126	3.06514	0.825376	0.305301	0.263486	0.973142	0.926479	0.943558	0.896661	1.23444
MIA PaCa2	0	Rep1	0.79751	2.62588	0.61656	1.04507	1.17089	1.18069	0.66957	1.05116	0.866422	0.785915	1.39036
MIA PaCa2	0	Rep1	0.857584	3.81207	0.71241	1.10409	1.20631	1.3141	0.832638	0.767193	0.83367	0.967613	1.23195
MIA PaCa2	0	Rep1	0.61968	0	0.504398	0.977122	0.478481	1.49896	1.13188	1.06177	1.04735	1.29308	1.31681
MIA PaCa2	0	Rep1	0.545145	0	0.290267	1.17263	2.04267	1.29327	0.65336	0.954849	1.02574	0.849415	0.813979
MIA PaCa2	0	Rep1	0.251843	0	0.522071	0.761186	1.16336	0.790151	1.67974	1.07761	0.702386	0.98213	1.38283
MIA PaCa2	0	Rep1	0.557939	0	0.36912	1.13925	0.82028	0.703694	0.672576	1.13098	1.05665	0.71283	1.53666
MIA PaCa2	0	Rep1	0.671763	1.82325	0.830691	0.814927	1.30165	0.894295	1.67851	0.971909	0.890766	0.834786	1.40096
MIA PaCa2	0	Rep1	0.878674	3.0421	0.875558	1.0095	1.08662	1.28212	0.981634	0.872463	0.993361	0.879658	1.17239
MIA PaCa2	0	Rep1	0.723718	0	0.513234	1.03278	0.772282	2.08731	0.925163	0.945567	0.891961	0.987429	1.3476
MIA PaCa2	0	Rep1	0.842325	0	0.324255	1.21186	0.923133	1.14619	0.877745	0.962915	1.0695	0.741707	1.55856
MIA PaCa2	0	Rep1	1.3252	6.28494	0.481964	0.819765	0.942572	1.77523	1.31437	0.636578	1.01636	1.51897	1.32911
MIA PaCa2	0	Rep1	0.677224	0	0.259676	1.13487	1.04623	1.50274	0.916978	1.10448	1.02197	0.682142	1.88318
MIA PaCa2	0	Rep1	0.806496	0	0.30998	1.17969	0.615751	1.40864	0.637263	1.03137	1.07945	1.16822	0.939036
MIA PaCa2	0	Rep1	0.584989	0	0.40379	1.02047	0.841564	1.3384	0.766269	1.18405	0.976726	1.14329	1.41158
MIA PaCa2	0	Rep1	1.37111	0	0.55742	1.07293	0.806786	1.26101	0.713816	0.89125	0.930794	1.13836	1.21888
MIA PaCa2	0	Rep1	0.429981	0	0.456813	0.984999	1.15323	1.20313	1.08693	1.00912	0.95494	0.803547	0.977626
MIA PaCa2	0	Rep1	0.969361	0	0.577814	0.908474	1.12192	0.970737	1.40943	1.1342	1.0149	1.11636	1.34556
MIA PaCa2	0	Rep1	0.905925	0	0.58937	1.10904	1.07437	1.13485	0.784134	0.863164	0.820251	1.07411	0.981943
MIA PaCa2	0	Rep1	0.922721	0	0.370481	0.931577	1.26669	1.46254	1.18353	1.05385	1.04871	0.874887	0.826608
MIA PaCa2	0	Rep1	0.797021	0	0.261716	1.02983	0.741673	1.31153	0.703102	1.13239	1.05132	1.65886	1.22148
MIA PaCa2	0	Rep1	1.25074	0	0.303182	0.995993	1.00479	2.22182	0.77424	1.0377	0.975889	0.766712	1.53926
MIA PaCa2	0	Rep1	0.37559	0	0.364362	1.06748	0.666465	0.959302	0.966742	1.19484	1.03609	0.715049	0.582008
MIA PaCa2	0	Rep1	1.14263	0.651085	0.481284	0.908886	0.765954	1.05287	1.52759	1.34469	0.898795	1.23201	0.607182
MIA PaCa2	0	Rep1	0.628909	0	0.953732	0.837058	0.505671	0.539018	1.15734	0.666926	0.859548	0.927715	1.48103
MIA PaCa2	0	Rep1	0.911479	2.37891	0.965967	1.01021	0.898106	0.690046	0.742436	0.785013	0.970767	1.18778	1.10882
MIA PaCa2	0	Rep1	0.953172	0	0.478566	1.13014	0.764273	1.27224	0.933302	1.22651	1.00448	1.2525	0.706369
MIA PaCa2	0	Rep1	0.999086	2.38916	1.11484	1.00258	0.768356	1.57129	0.991355	0.831163	0.96179	1.2679	1.27622
MIA PaCa2	0	Rep1	0.861624	0	0.61928	1.00567	1.19517	1.39056	0.923271	1.02088	0.887296	1.21425	1.11826
MIA PaCa2	0	Rep1	0.305538	0.925859	2.82041	0.525479	0.35214	0.314273	1.11873	0.840228	0.915569	0.884724	0.719806
MIA PaCa2	0	Rep1	1.23807	0	0.690657	1.04185	0.674586	1.33572	0.911497	0.731553	0.78919	0.723543	0.922589
MIA PaCa2	0	Rep1	0.178574	0	1.71917	0.928674	0.26928	0.173394	0.913494	0.975554	0.850636	0.840621	0.965311
MIA PaCa2	0	Rep1	0.832992	0	0.509156	1.11592	0.6635	0.842061	0.76211	0.863834	0.918476	0.547912	1.23487
MIA PaCa2	0	Rep1	0.748792	0	0.388155	1.12463	0.681772	0.866675	0.906759	1.13518	0.897499	1.06002	0.673623
MIA PaCa2	0	Rep1	0.335329	0	1.21681	0.799235	0.37646	0.316135	1.00277	0.859149	0.778517	0.928737	0.524996
MIA PaCa2	0	Rep1	0.627922	0	0.52479	1.12254	0.525702	0.581735	0.773233	1.02381	0.906014	0.783176	0.818843
MIA PaCa2	0	Rep1	0.740653	0	0.585291	0.89808	0.805824	0.57398	1.1868	0.958097	1.01988	0.933864	0.765386
MIA PaCa2	0	Rep1	0.799667	0	0.659387	1.14657	0.596927	0.57214	0.718819	0.822228	0.946983	0.776158	0.494416
MIA PaCa2	0	Rep1	0.488495	0	0.394272	0.968098	1.02535	0.524247	0.74617	0.956711	1.02881	0.636646	0.627167
MIA PaCa2	0	Rep1	1.14806	0	0.600246	1.07304	0.767183	0.55514	0.712181	0.648535	0.963114	0.626407	0.994203
MIA PaCa2	0	Rep1	0.601466	0	0.842928	1.0869	0.591963	0.537585	0.69569	1.01289	0.851373	0.869716	0.381645
MIA PaCa2	0	Rep1	0.526842	0	0.340571	1.06955	0.547249	0.770388	0.907683	1.09799	0.989453	1.09268	0.611658
MIA PaCa2	0	Rep1	0.914516	0	0.90071	1.10981	0.813004	0.636321	0.766507	0.906334	0.883076	0.835779	0.739795
MIA PaCa2	0	Rep1	0.613553	4.71659	0.996558	0.872015	0.696812	1.34076	1.48878	0.784384	0.936905	0.845526	1.08204
MIA PaCa2	0	Rep1	0.437105	0	0.256276	1.14599	1.36226	1.93677	0.862065	0.90577	1.05131	1.08364	1.53197
MIA PaCa2	0	Rep1	0.753744	0	0.34125	1.10286	1.24444	1.76872	0.902572	1.02687	0.935468	0.768302	1.36039
MIA PaCa2	0	Rep1	1.16747	0	1.38675	0.780565	0.716611	1.02421	1.57688	0.93567	0.786234	1.08501	0.664474
MIA PaCa2	0	Rep1	0.811466	0	1.1026	0.646889	0.898386	0.838427	1.45575	0.786805	0.934084	0.94122	0.720904
MIA PaCa2	0	Rep1	0.691959	0	0.452054	1.00219	1.45795	1.02609	0.813494	1.0446	0.856893	0.601887	1.06551
MIA PaCa2	0	Rep1	0.546094	0	0.523431	0.898736	1.08727	0.766887	1.25762	1.11563	0.849828	0.614731	1.26979
MIA PaCa2	0	Rep1	0.436041	0	0.263754	1.12581	1.03729	0.491089	0.603646	1.06379	0.945981	0.555642	0.535567
MIA PaCa2	0	Rep1	1.27961	0	0.590729	0.845678	0.617982	1.70484	1.86423	0.933817	1.05923	1.00025	1.06989
MIA PaCa2	0	Rep1	0.986526	0	0.498959	1.08934	0.737726	0.892443	0.797451	1.08159	0.970529	0.785597	1.41909
MIA PaCa2	0	Rep1	0.593119	0	0.254238	0.919333	0.843695	0.484404	0.676119	1.09075	0.981564	0.710683	0.619007
MIA PaCa2	0	Rep1	0.543314	0	0.627437	0.98367	0.796596	0.588535	0.84839	1.20556	0.752367	1.01553	0.769361
MIA PaCa2	0	Rep1	1.02749	0	0.261716	1.01318	0.919574	1.64804	0.882914	1.04542	0.873453	0.927744	1.34533
MIA PaCa2	0	Rep1	1.12315	0	0.315419	1.15394	0.647861	0.971251	0.647717	1.03848	1.03357	0.932442	1.34903
MIA PaCa2	0	Rep1	0.57712	0	0.28007	1.09139	0.832408	0.664164	0.895485	1.07645	0.924097	1.0789	0.980581
MIA PaCa2	0	Rep1	1.11735	0	0.549263	1.04011	1.03929	0.735031	0.872174	0.930551	0.904527	0.688102	1.03693
MIA PaCa2	0	Rep1	0.531328	0	0.471768	1.05339	0.402025	0.327255	0.903743	1.05525	0.985209	0.553023	0.756885
MIA PaCa2	0	Rep1	1.45748	0	0.550622	1.12792	0.879676	1.69611	1.03686	0.906879	0.995368	1.21868	1.05266
MIA PaCa2	0	Rep1	0.860772	0	0.46497	0.972808	0.544621	0.617062	1.23755	0.811519	0.942487	1.28601	0.789427
MIA PaCa2	0	Rep1	0.729503	0	0.477885	1.03645	0.862752	1.43236	0.89748	0.970038	0.908529	1.12467	0.916447
MIA PaCa2	0	Rep1	1.05637	0	0.65055	0.905676	0.929483	0.884655	1.04046	0.851505	1.04555	0.993787	0.645916
MIA PaCa2	0	Rep1	1.16365	0	0.469728	1.05064	0.827449	1.95042	0.792484	1.16096	0.98817	1.20476	1.34967
MIA PaCa2	0	Rep1	1.42129	0	0.413307	1.15139	0.668295	1.85676	0.668172	0.818189	1.00386	1.35106	1.08249
MIA PaCa2	0	Rep1	0.934747	0	0.760674	0.840288	0.893092	0.822654	1.40847	0.915586	0.979451	0.97894	0.66976
MIA PaCa2	0	Rep1	0.93843	0	0.321536	0.988886	1.12722	1.6012	0.940382	1.01625	1.02919	0.692594	1.10455
MIA PaCa2	0	Rep1	1.69964	0	0.552662	1.02135	0.744135	1.4406	0.887716	0.934094	0.997144	1.34969	0.780484
MIA PaCa2	0	Rep1	1.07952	0	0.569657	1.17819	0.803243	0.830931	0.754382	0.961772	1.03435	1.17352	0.769871
MIA PaCa2	0	Rep1	0.99813	0	0.27939	1.0549	0.425111	0.479387	0.994491	1.16986	1.0801	0.973389	0.795661
MIA PaCa2	0	Rep1	0.651524	0	0.652589	0.899175	0.626651	0.865965	1.65902	0.897533	0.916731	1.17962	0.505416
MIA PaCa2	0	Rep1	1.50752	0	0.530229	1.21583	0.769195	0.752313	0.729695	0.744841	0.991479	0.997867	0.92419
MIA PaCa2	0	Rep1	0.922218	0	0.426222	1.141	1.24881	1.16086	0.725279	0.920166	1.02292	0.687802	0.680041
MIA PaCa2	0	Rep1	0.27704	0	0.859922	0.934928	0.232921	0.188429	0.983424	1.08588	0.945233	0.723907	0.402754
MIA PaCa2	0	Rep1	0.901207	0	0.857883	0.98896	0.716411	0.970065	0.866196	0.979044	0.817542	1.06075	1.21222
MIA PaCa2	0	Rep1	0.820366	0	0.858563	1.06947	1.01294	1.86042	0.81201	0.606509	0.92565	1.03721	0.909328
MIA PaCa2	0	Rep1	0.61126	0	0.6825	0.98587	0.839453	1.06688	1.13172	0.98282	0.966056	1.04931	1.38679
MIA PaCa2	0	Rep1	0.832125	0	0.475167	0.901732	1.47828	1.2351	1.27683	0.892477	0.996378	0.863953	0.98593
MIA PaCa2	0	Rep1	0.533639	2.12968	0.980924	0.936035	0.993094	1.46661	0.874468	0.900191	0.869975	0.976517	0.774658
MIA PaCa2	0	Rep1	1.79688	0	0.383396	1.21823	0.62687	0.931397	0.603434	0.65479	1.01523	0.988126	1.09933
MIA PaCa2	0	Rep1	0.51887	0	0.303863	1.02758	1.01698	1.41953	0.995079	1.18479	1.10217	0.943978	0.894067
MIA PaCa2	0	Rep1	1.55813	2.28202	0.755237	0.885719	0.787602	1.84914	0.899225	0.798849	1.01255	1.25147	1.06317
MIA PaCa2	0	Rep1	0.707971	0	0.598887	0.910806	0.408161	0.435325	0.736383	1.01644	0.964601	0.796776	0.958993
MIA PaCa2	0	Rep1	0.692029	0	0.80622	0.99467	0.872084	1.53781	0.861933	0.973169	1.01383	0.996591	0.547723
MIA PaCa2	0	Rep1	0.415856	0	0.237922	0.954485	1.71311	1.25124	1.03872	1.05765	0.90561	0.584731	0.712053
MIA PaCa2	0	Rep1	0.604813	0	0.787866	1.0074	1.19969	1.51316	1.09089	0.92086	1.01896	0.817821	0.743573
MIA PaCa2	0	Rep1	0.934875	0	0.425543	0.989606	0.619054	0.647052	1.47075	1.06134	1.05547	1.26524	0.5884
MIA PaCa2	0	Rep1	0.416926	0	0.254238	1.18254	1.8513	1.24717	0.773658	1.14548	1.04898	1.61572	1.45187
MIA PaCa2	0	Rep1	1.03801	0	0.49488	1.08402	0.431949	0.488371	0.763594	0.918994	0.875292	1.2581	0.445347
MIA PaCa2	0	Rep1	0.839554	0	0.692696	1.01379	1.0386	1.43011	0.996683	0.903977	0.977777	1.07431	0.679228
MIA PaCa2	0	Rep1	0.853273	0	0.509156	0.823669	1.96586	1.85134	1.35043	0.83523	0.886913	1.11053	2.09799
MIA PaCa2	0	Rep1	0.791267	0	0.598887	1.10724	0.581025	1.00781	0.814021	1.11351	0.945431	1.05715	0.929293
MIA PaCa2	0	Rep1	0.965365	0	0.443897	1.09444	0.558692	1.82482	0.939537	0.78226	0.904926	1.39988	1.40209
MIA PaCa2	0	Rep1	0.747627	0	0.647831	1.24063	0.758502	1.52034	0.811244	1.00445	0.833639	0.842468	0.941468
MIA PaCa2	0	Rep1	0.671556	0	0.384756	1.05857	1.26219	1.51233	0.941135	1.16656	0.996378	0.904326	1.46527
MIA PaCa2	0	Rep1	0.752139	0	1.19573	1.07628	0.488397	0.35923	0.769454	0.569239	0.911496	0.729339	0.923036
MIA PaCa2	0	Rep1	0.906545	0	1.77219	0.791871	1.12877	0.78131	1.4594	0.996777	0.828444	0.905993	0.357838
MIA PaCa2	0	Rep1	1.17251	0	0.737562	0.959786	0.661584	0.553212	1.16492	0.848555	1.04722	1.09587	0.758567
MIA PaCa2	0	Rep1	1.05588	0	0.719888	0.76846	0.866667	1.36559	1.00092	0.853187	1.0054	1.15017	0.584496
MIA PaCa2	0	Rep1	0.948325	4.48217	0.827292	0.992764	0.856764	0.927553	1.04265	0.708139	1.0405	1.15359	0.883099
MIA PaCa2	0	Rep1	1.23214	0.403932	0.646472	0.877993	0.849394	0.924642	1.30072	0.940694	1.00341	1.36446	0.837768
MIA PaCa2	0	Rep1	1.09332	0	0.420785	0.767436	0.684341	1.2848	1.62065	0.939084	0.927591	0.745508	0.576953
MIA PaCa2	0	Rep1	0.345895	0	1.40035	0.755858	0.252758	0.202629	1.32431	0.870949	1.00936	0.779532	0.685716
MIA PaCa2	0	Rep1	0.629197	0	0.46769	1.011	0.859766	0.758135	0.937533	0.934202	0.851558	0.595548	0.597319
MIA PaCa2	0	Rep1	0.900942	0.364329	1.14679	0.904175	0.796437	0.987075	1.36452	0.627436	0.895498	1.08108	0.460835
MIA PaCa2	0	Rep1	0.987365	0.571742	0.730764	0.868061	0.690967	1.02228	0.834862	0.724147	1.02687	1.42725	0.923605
MIA PaCa2	0	Rep1	0.670011	0	0.430301	0.927628	0.452747	0.858722	1.48003	0.962121	0.943558	1.72321	0.505394
MIA PaCa2	0	Rep1	0.509663	0	0.409227	0.990443	0.952639	0.58653	0.840096	1.16822	0.991951	1.15134	0.615152
MIA PaCa2	0	Rep1	1.0512	0	0.912266	0.671494	0.729284	0.958808	2.05725	1.12162	0.88241	1.1677	0.747803
MIA PaCa2	0	Rep1	1.38375	4.06302	0.565577	1.18732	0.885148	0.960418	0.794201	0.655905	0.931733	0.996089	0.751821
MIA PaCa2	0	Rep1	0.655411	0	1.09853	0.893181	0.315778	0.257109	0.898082	0.706071	0.964601	0.750403	0.816595
MIA PaCa2	0	Rep1	0.97291	1.41447	1.40307	1.06108	0.738581	1.28575	0.79132	0.699779	0.888505	1.05699	0.815318
MIA PaCa2	0	Rep1	0.838473	0	0.747078	0.94197	0.644331	0.62651	0.887544	1.06382	1.02177	1.44463	0.329513
MIA PaCa2	0	Rep1	0.892924	0	0.757955	0.82521	0.662388	1.13134	0.816438	0.786631	0.994714	1.29236	0.764604
MIA PaCa2	0	Rep1	1.20086	1.75273	0.71513	0.967929	1.11252	0.780491	0.907888	0.716283	0.845125	0.995803	0.705408
MIA PaCa2	0	Rep1	1.57575	0	0.479925	1.02691	0.483642	0.785724	1.18608	1.09723	0.817284	1.36408	1.00679
MIA PaCa2	0	Rep1	1.17664	0	0.383396	1.2368	0.963792	1.06937	0.697514	1.05918	0.956392	0.557649	1.01593
MIA PaCa2	0	Rep1	0.656374	0	0.585291	0.915652	1.73928	1.12511	1.11025	1.40803	0.999721	0.852809	0.688358
MIA PaCa2	0	Rep1	0.450176	0	0.434379	0.933043	1.27425	1.03562	1.22286	0.948896	1.01335	0.913981	1.11186
MIA PaCa2	0	Rep1	1.05828	0	0.567617	0.767484	0.859544	1.20579	1.74007	1.0321	0.965659	1.24839	1.13836
MIA PaCa2	0	Rep1	1.02903	0	0.58665	1.14413	0.826724	0.975475	0.847811	1.10098	0.946183	0.937433	1.51224
MIA PaCa2	0	Rep1	1.36256	0	0.399032	1.1275	0.771103	1.02702	0.685013	0.855358	1.04037	1.38189	1.25019
MIA PaCa2	0	Rep1	1.09828	0	0.537707	1.00461	0.830124	1.34087	0.898255	0.71663	0.895053	1.05445	0.952466
MIA PaCa2	0	Rep1	0.600472	2.50527	0.813017	1.03558	1.47751	0.947975	0.875177	1.04212	0.943089	0.918374	1.48247
MIA PaCa2	0	Rep1	0.666089	0	0.997917	0.803409	1.1501	1.15505	1.59999	1.05831	0.824457	0.813949	1.38232
MIA PaCa2	0	Rep1	0.61011	0	0.393593	1.16672	1.02442	1.00294	0.723117	1.21038	0.997824	0.816774	1.6959
MIA PaCa2	0	Rep1	0.655049	0	0.203255	1.11346	1.08084	0.67719	0.845716	0.920454	1.02039	0.683557	1.01075
MIA PaCa2	0	Rep1	0.640362	0	0.381357	1.08213	1.78486	0.923792	0.688682	1.1108	1.02713	1.01853	1.72986
MIA PaCa2	0	Rep1	0.940963	0	0.358925	0.772081	1.63696	0.919448	1.63382	0.982216	1.0057	1.37685	1.56556
MIA PaCa2	0	Rep1	0.853173	0	0.472448	0.971128	0.505771	1.20793	1.14759	0.968751	0.981786	1.52309	0.907058
MIA PaCa2	0	Rep1	0.568564	0	0.252877	0.916209	1.883	1.03597	1.08761	1.12519	1.00171	1.35158	1.22645
MIA PaCa2	0	Rep1	0.577901	0	0.379317	1.06389	1.12518	0.756981	0.861766	1.16662	1.04777	0.790046	0.939652
MIA PaCa2	0	Rep1	1.18853	3.56549	0.615201	0.766917	1.32499	0.877647	1.64945	0.853121	0.966443	1.29603	1.02555
MIA PaCa2	0	Rep1	0.812982	0	0.755237	1.00011	0.934793	0.839626	0.865645	0.840458	0.858522	1.36142	1.02537
MIA PaCa2	0	Rep1	0.867113	0	0.490802	1.02878	1.25253	1.6023	0.869269	1.00674	0.940966	0.665513	1.13456
MIA PaCa2	0	Rep1	0.844602	0.517942	0.605004	0.981701	0.883055	1.00893	0.879848	1.16848	0.965236	0.944208	1.18119
MIA PaCa2	0	Rep1	0.573941	0	0.77699	0.924056	1.61562	1.23598	0.900162	1.20514	0.893135	0.861975	1.32909
MIA PaCa2	0	Rep1	0.46258	0	0.594128	1.05512	1.15836	0.759638	1.01785	1.12363	0.871452	0.801037	0.563686
MIA PaCa2	0	Rep1	0.858697	0	0.488762	1.01437	0.780817	0.706973	1.13003	1.15324	0.89857	0.880619	0.623149
MIA PaCa2	0	Rep1	0.253793	0	0.348728	0.93246	0.631954	0.687496	0.971298	1.1707	0.999596	1.10268	0.793075
MIA PaCa2	0	Rep1	0.433154	0	0.425543	1.15553	1.59612	1.1224	0.765506	1.16883	0.925247	0.841214	1.68205
MIA PaCa2	0	Rep1	1.053	0	0.24744	1.12176	1.48418	0.505343	1.02496	1.05963	0.991831	1.20714	0.673515
MIA PaCa2	0	Rep1	1.2852	0.606856	0.430301	1.0742	0.942181	0.729469	0.956125	1.04954	0.985293	1.24594	1.0155
MIA PaCa2	0	Rep1	0.430301	0	0.391554	1.02792	1.14894	0.630744	0.899608	1.00394	0.998791	0.904466	0.957361
MIA PaCa2	0	Rep1	2.20769	0	0.354165	1.19831	0.736509	2.31631	0.642893	0.730096	1.03839	1.21247	1.34471
MIA PaCa2	0	Rep1	1.81337	0	0.558099	1.13695	0.737852	1.37251	0.666999	0.865368	1.0384	1.10009	1.11846
MIA PaCa2	0	Rep1	0.80452	0.316685	0.824574	0.95774	0.784429	0.985882	1.3212	0.947436	0.987906	1.01625	0.977579
MIA PaCa2	0	Rep1	0.653773	0.201825	1.55262	0.656874	0.914891	0.578865	1.46014	0.977276	0.739743	1.30192	0.467759
MIA PaCa2	0	Rep1	0.917173	0	0.778349	0.982552	0.934546	1.00806	0.759203	1.09555	0.785331	0.880565	0.844979
MIA PaCa2	0	Rep1	0.541471	0	0.765432	1.04582	0.945379	0.63707	0.622176	0.934432	1.03992	1.09874	0.863566
MIA PaCa2	0	Rep1	0.787864	0	0.747078	1.08091	1.45679	0.806513	0.706867	0.930928	1.00529	0.981229	1.35449
MIA PaCa2	0	Rep1	0.570943	0	0.578493	0.985187	1.04727	0.486611	0.756497	1.20566	1.0247	0.894859	0.814625
MIA PaCa2	0	Rep1	1.35383	6.16133	0.830691	0.970115	0.961448	0.743123	1.25718	0.631075	0.950153	1.00097	1.0302
MIA PaCa2	0	Rep1	0.891294	0.307722	1.01831	0.853117	0.659159	1.47673	1.12601	0.844665	0.967083	1.18726	1.05114
MIA PaCa2	0	Rep1	0.528738	0	0.580533	0.828927	0.963646	0.70944	1.2475	1.06846	0.934103	0.794073	0.704234
MIA PaCa2	0	Rep1	0.451522	0	1.08901	0.841906	0.415352	0.364853	0.995722	0.789443	0.955437	0.852633	1.06018
MIA PaCa2	0	Rep1	0.845365	0	0.379997	1.23031	0.894947	0.90743	0.630337	1.01068	0.98566	0.94567	0.966805
MIA PaCa2	0	Rep1	0.53925	0	0.815736	0.967774	0.475411	0.218144	1.21494	0.79249	0.77173	0.885083	0.644073
MIA PaCa2	0	Rep1	1.10044	0	1.05706	1.12762	0.80575	0.620065	0.947441	0.713361	0.804734	0.864293	0.511198
MIA PaCa2	0	Rep1	0.43263	0	0.505757	1.11149	1.09926	1.02277	0.671397	1.1633	0.809579	0.659156	0.568333
MIA PaCa2	0	Rep1	1.26134	2.88687	0.560819	1.1141	0.970302	0.753677	0.908469	0.832018	0.935388	0.894746	0.774558
MIA PaCa2	0	Rep1	1.57428	1.49779	0.592769	1.20595	0.839966	0.957323	0.799129	0.719674	0.812458	0.854381	1.00943
MIA PaCa2	0	Rep1	0.419278	0	1.09105	1.04361	0.357261	0.345322	0.689348	0.976434	0.894347	0.700694	0.377385
MIA PaCa2	0	Rep1	1.0662	1.73951	0.720567	1.24739	0.613806	0.994324	0.696503	0.629052	0.921514	0.943562	0.675913
MIA PaCa2	0	Rep1	0.650316	4.61855	0.588011	1.02656	1.0201	0.869434	0.903359	1.22399	0.951127	1.0284	0.971445
MIA PaCa2	0	Rep1	1.08645	1.70241	0.951012	0.925772	0.953461	0.961934	1.47711	0.862319	0.839214	0.737325	0.787642
MIA PaCa2	0	Rep1	0.836357	0	2.08149	1.09238	0.821133	1.66227	0.747984	0.939244	0.912915	0.840499	0.88667
MIA PaCa2	0	Rep1	0.99993	0.630477	0.579852	1.02885	0.578833	1.16171	0.735771	0.876391	1.01922	0.993744	0.842293
MIA PaCa2	0	Rep1	0.312923	0	0.827973	0.53863	0.269046	0.202312	1.79837	0.942259	0.854218	0.815966	0.944046
MIA PaCa2	0	Rep1	0.158221	0	3.36152	0.758256	0.217046	0.101079	0.974858	0.973819	1.01433	0.894231	0.890873
MIA PaCa2	0	Rep1	1.2188	0	0.299783	1.11909	0.705509	0.678332	0.689019	0.878611	0.931394	0.929033	1.23586
MIA PaCa2	0	Rep1	0.76103	0	0.481964	1.04177	0.450276	0.61355	0.807445	0.888534	0.810933	0.675198	0.746714
MIA PaCa2	0	Rep1	1.39949	0	0.356885	0.958426	0.815795	1.00236	0.94199	0.87327	1.00305	1.50751	0.740767
MIA PaCa2	0	Rep1	2.14556	3.69825	0.437778	1.24243	0.782648	1.88456	0.572888	0.629951	1.02248	0.997598	1.17591
MIA PaCa2	0	Rep1	0.522072	2.87592	1.14407	0.823795	0.310229	0.29139	1.06455	1.06334	0.981786	0.912374	1.31335
MIA PaCa2	0	Rep1	0.857524	0	0.302502	0.980098	0.314576	1.23706	0.917575	0.764854	0.863079	1.10899	1.0872
MIA PaCa2	0	Rep1	1.36598	0	0.352127	1.0168	0.76258	1.00884	1.13398	0.888891	0.832262	0.879973	1.50325
MIA PaCa2	0	Rep1	1.36269	0	0.282789	1.04592	0.940716	1.54265	0.98154	0.96584	0.973317	0.736694	1.10368
MIA PaCa2	0	Rep1	1.3081	0	0.423503	1.10657	0.59376	1.24594	0.700657	1.10367	1.00804	1.24599	0.903618
MIA PaCa2	0	Rep1	1.30544	0	0.569657	1.08688	0.743048	1.19923	1.02596	0.838292	1.00149	0.908247	0.480376
MIA PaCa2	0	Rep1	0.415088	0	0.251519	1.21951	0.445869	1.07418	0.906384	1.09759	0.994384	0.749488	0.698979
MIA PaCa2	0	Rep1	1.26203	0	0.392913	1.03009	1.05929	1.15649	0.794653	0.9839	0.865238	0.781202	0.790897
MIA PaCa2	0	Rep1	1.21774	0	0.209373	0.9255	1.10988	0.970851	0.938097	1.17405	0.930291	0.738749	1.16847
MIA PaCa2	0	Rep1	0.992312	0	0.521391	0.852605	0.799426	0.82391	1.08364	1.14157	0.899449	1.01938	0.592969
MIA PaCa2	0	Rep1	1.55916	0	0.560139	0.741319	1.07	1.33234	2.14212	0.883145	0.949285	1.16725	0.625273
MIA PaCa2	0	Rep1	1.13216	5.0973	0.850406	1.14423	1.01915	1.12987	0.796936	0.721308	0.953632	1.25576	0.981443
MIA PaCa2	0	Rep1	1.03797	2.99774	0.609764	0.966851	1.18221	1.27689	1.04305	1.02112	0.927206	1.21434	1.02276
MIA PaCa2	0	Rep1	1.5393	0	0.402431	0.944661	1.50809	1.49234	1.14839	0.944093	0.823977	1.08646	0.638389
MIA PaCa2	0	Rep1	1.28799	0	0.337851	1.12973	0.946538	1.54395	0.684782	0.799695	1.02687	1.33789	1.1657
MIA PaCa2	0	Rep1	0.502419	0	0.455453	1.08352	1.01967	0.940847	0.812373	1.08658	1.05327	0.84728	0.832204
MIA PaCa2	0	Rep1	0.769808	0	0.580533	1.07508	0.778351	1.37329	1.06644	0.94276	0.977534	0.966572	0.645497
MIA PaCa2	0	Rep1	1.01105	0	0.454094	1.16892	0.937298	1.57538	0.698139	1.03759	1.05356	1.15386	0.989563
MIA PaCa2	0	Rep1	0.997294	0.396275	1.05434	1.10751	0.892351	1.05729	0.956033	0.856009	0.952474	0.896245	0.983267
MIA PaCa2	0	Rep1	0.930942	0	0.523431	0.917439	0.771618	1.01932	1.32706	0.960649	1.00754	1.23323	0.46365
MIA PaCa2	0	Rep1	1.17476	0	0.569657	1.08688	1.0635	1.10905	0.954726	0.874681	1.03928	0.881674	1.56937
MIA PaCa2	0	Rep1	0.911662	0	0.647151	1.11	1.10971	0.736204	0.725008	0.83606	0.878035	0.958555	0.47226
MIA PaCa2	0	Rep1	0.671553	0	0.40311	1.04622	0.790745	0.744988	0.881507	0.862963	0.866361	0.848334	0.514556
MIA PaCa2	0	Rep1	1.1862	0	0.52955	1.14219	0.711134	0.915059	0.885485	0.798584	1.02925	0.985515	0.750782
MIA PaCa2	0	Rep1	0.683844	0	0.450015	0.953551	0.992679	0.604348	0.774599	1.05465	1.02124	0.685472	0.332626
MIA PaCa2	0	Rep1	0.80131	0	0.751157	0.882798	1.05244	0.98455	1.0823	0.99792	1.0054	0.846668	0.676131
MIA PaCa2	0	Rep1	1.81957	0	0.386115	0.877383	1.05113	1.36465	1.68224	1.01291	0.96278	1.27021	0.843302
MIA PaCa2	0	Rep1	0.600391	0	0.573735	0.807991	0.888012	0.835846	1.93713	0.983155	0.930584	0.924994	0.522102
MIA PaCa2	0	Rep1	0.490001	0	0.522752	0.853989	1.06274	0.763031	1.8134	1.03078	1.03498	1.0143	0.467952
MIA PaCa2	0	Rep1	1.17013	8.52459	0.490122	1.09089	1.12551	0.912814	0.806081	0.779848	0.900196	1.03884	0.550823
MIA PaCa2	0	Rep1	0.865859	0	0.889152	1.00185	0.919594	0.898551	0.68868	1.06017	1.01647	0.972022	0.674718
MIA PaCa2	0	Rep1	0.486498	0	0.424184	1.02508	0.830409	0.844668	0.983202	1.06706	0.963294	0.907103	0.464528
MIA PaCa2	0	Rep1	0.915025	0	0.420104	0.893074	1.03822	0.864233	1.22618	1.02765	0.975622	0.705375	0.630962
MIA PaCa2	0	Rep1	0.802246	0	0.290946	1.15463	0.849546	1.05346	0.722537	1.00004	1.05446	1.23296	0.526309
MIA PaCa2	0	Rep1	1.1344	0	0.30998	1.1062	0.536868	0.916404	0.94544	0.98859	1.01143	1.00506	0.513662
MIA PaCa2	0	Rep1	0.844671	0	0.324935	1.03936	1.40832	0.892545	0.737151	1.10069	1.03111	0.633761	0.897961
MIA PaCa2	0	Rep1	1.0841	0	0.368441	0.94026	0.736539	0.533318	1.10518	1.20845	0.987411	1.21918	0.804451
MIA PaCa2	0	Rep1	0.781918	0	0.58869	1.00599	0.947542	0.708698	0.873595	1.10465	1.0239	0.888248	0.352252
MIA PaCa2	0	Rep1	0.943126	0	0.921102	0.780327	1.0664	0.815621	2.16142	1.04695	0.86842	1.18305	0.53782
MIA PaCa2	0	Rep1	0.727925	1.72648	0.786506	0.726823	0.850034	1.16394	1.85055	1.06321	1.0031	1.27622	0.834843
MIA PaCa2	0	Rep1	1.10956	0	0.509835	1.0405	1.01759	1.02641	0.894299	0.941627	0.972006	0.907759	1.1964
MIA PaCa2	0	Rep1	2.17287	0	0.460892	1.2625	0.838482	1.71215	0.563724	0.740469	0.897121	1.53173	1.04455
MIA PaCa2	0	Rep1	0.652555	0	0.524111	1.10839	1.05389	0.993544	0.671543	1.08192	0.992934	0.807279	0.463021
MIA PaCa2	0	Rep1	1.00203	0	0.541106	0.917272	1.03541	1.07918	1.05198	0.967865	1.01784	1.22233	0.823545
MIA PaCa2	0	Rep1	1.88646	0	0.513914	0.956454	0.625981	1.59972	1.50243	0.77204	0.917714	1.31179	1.09319
MIA PaCa2	0	Rep1	0.531938	0	0.595488	0.934447	0.985085	0.649209	1.03966	0.928221	1.00994	0.804355	0.573639
MIA PaCa2	0	Rep1	0.93318	0	0.74504	0.81648	1.1264	1.05903	1.36919	1.05493	0.930088	1.00213	1.1105
MIA PaCa2	0	Rep1	0.896766	0	0.269873	0.984586	1.27373	0.728467	1.0045	1.04782	1.01422	1.01674	0.783355
MIA PaCa2	0	Rep1	1.07646	0	0.246761	0.916184	1.03024	0.744506	1.32127	1.0234	1.00685	1.5062	0.868823
MIA PaCa2	0	Rep1	0.398341	0	0.365723	1.08508	1.01922	0.862591	0.893802	1.20995	1.05131	0.591075	0.557214
MIA PaCa2	0	Rep1	0.45756	0	1.1835	0.785737	0.37451	0.35997	1.48887	0.78736	0.894943	0.77958	1.10468
MIA PaCa2	0	Rep1	0.820795	0	1.00607	0.979614	0.376594	0.1895	1.01842	0.727275	0.837174	0.770565	0.887732
MIA PaCa2	0	Rep1	0.728504	2.20377	0.687258	0.980702	0.592101	0.40305	0.85286	0.970212	0.916731	0.736114	1.07415
MIA PaCa2	0	Rep1	1.46612	0	0.632196	1.13072	0.57625	0.519841	0.916443	0.57837	1.02418	0.978877	1.20882
MIA PaCa2	0	Rep1	1.20041	3.22561	0.534308	1.00077	1.07946	0.670043	1.05164	0.795695	0.855508	0.733278	0.550969
MIA PaCa2	0	Rep1	0.800594	0	0.426222	1.05444	0.601599	0.852779	0.921638	0.835054	0.915943	1.49676	0.922304
MIA PaCa2	0	Rep1	0.733348	0	0.67842	1.06193	0.61582	0.361175	0.969058	0.928885	0.93596	0.607912	0.732286
MIA PaCa2	0	Rep1	1.37449	4.33155	0.458172	0.986784	1.36549	0.749148	0.731286	0.986695	0.797321	0.863609	1.10905
MIA PaCa2	0	Rep1	0.827551	0	0.458172	0.931686	1.15067	0.904842	1.00621	0.896622	0.79965	0.817807	0.56367
MIA PaCa2	0	Rep1	1.18143	0	1.10192	0.738279	0.67321	0.581261	2.09341	0.939013	0.975807	0.988192	0.548388
MIA PaCa2	0	Rep1	0.542119	0	0.568976	1.17737	0.736259	0.589257	0.96082	0.831762	0.864855	0.91839	0.62507
MIA PaCa2	0	Rep1	0.428291	0	0.607044	0.780145	0.84554	0.690877	1.93343	0.855007	0.962404	0.913748	0.399509
MIA PaCa2	0	Rep1	0.531611	0	0.729404	0.979491	0.438609	0.307871	0.743311	0.83072	0.997889	0.723127	0.556011
MIA PaCa2	0	Rep1	0.519928	0	0.363003	1.03586	0.854997	0.560532	0.906707	1.16469	0.940966	0.901597	0.724366
MIA PaCa2	0	Rep1	0.701641	0	0.643752	0.916622	0.969703	0.867049	1.15782	0.898457	0.882282	0.769344	0.531407
MIA PaCa2	0	Rep1	1.52917	0.893346	0.46769	1.14366	0.768728	0.98932	0.965249	0.915254	0.94216	0.902541	0.739982
MIA PaCa2	0	Rep1	0.452859	0	0.565577	0.896616	0.855426	0.951406	1.14447	1.00385	1.06099	0.930223	0.593597
MIA PaCa2	0	Rep1	0.612551	0	0.605684	1.07881	0.494046	0.263094	0.703926	0.88184	0.942487	0.746083	0.630757
MIA PaCa2	0	Rep1	1.43794	0	0.619959	1.13009	0.97508	1.06132	0.873168	0.605797	0.979585	0.987843	0.874272
MIA PaCa2	0	Rep1	1.26951	0	0.468369	1.10179	1.24176	0.885023	0.782149	0.888129	0.921787	0.916589	0.887032
MIA PaCa2	0	Rep1	1.00353	0	0.58665	1.03605	0.842395	0.833702	0.774799	1.11881	0.995136	0.816622	0.990886
MIA PaCa2	0	Rep1	1.47333	0	0.334452	1.19514	0.969895	0.747994	0.792848	0.710259	1.01996	1.09496	0.941614
MIA PaCa2	0	Rep1	1.09168	2.91946	1.01967	1.05987	0.788064	0.454234	1.00871	0.895577	0.871678	0.771946	0.477346
MIA PaCa2	0	Rep1	0.893384	0	0.454094	1.1094	1.10199	1.40155	0.685727	0.994975	1.00477	1.01292	0.479912
MIA PaCa2	0	Rep1	1.96523	0	0.515954	1.06013	0.636693	0.587336	1.10325	0.758508	1.06014	1.09001	1.35601
MIA PaCa2	0	Rep1	0.614693	0.545524	0.574415	0.905194	0.647953	0.544457	0.990969	1.15289	1.0239	0.980783	0.639244
MIA PaCa2	0	Rep1	0.930238	0	0.159069	1.01572	1.07319	0.619303	0.894625	1.03422	0.898881	0.710905	0.579397
MIA PaCa2	0	Rep1	0.998625	0	0.583251	0.979938	0.756149	1.35404	1.46731	0.822209	1.02696	1.4296	0.739644
MIA PaCa2	0	Rep1	0.666973	0	0.440498	1.08941	0.98981	0.899654	0.891771	0.963524	0.981925	0.894081	1.13507
MIA PaCa2	0	Rep1	1.59402	1.8177	0.43098	1.16427	0.915225	1.75928	0.644039	0.771916	0.936829	1.37557	0.85864
MIA PaCa2	0	Rep1	1.1316	0	0.606365	1.14049	0.962719	0.970173	0.708714	0.831883	1.00397	1.04229	0.83923
MIA PaCa2	0	Rep1	1.01232	0	0.225008	1.05805	1.11227	1.33863	0.723877	1.06453	0.970114	0.758507	1.31555
MIA PaCa2	0	Rep1	1.27888	0	0.454094	1.06812	0.798069	0.728397	1.1102	0.861936	0.967631	1.20518	0.794107
MIA PaCa2	0	Rep1	1.14198	0	0.37388	0.986299	0.872372	1.56109	0.998662	0.932752	0.901819	1.14068	1.12446
MIA PaCa2	0	Rep1	0.480872	0	0.28007	1.16747	0.881834	0.457016	0.689222	1.18024	1.01848	0.810117	0.761895
MIA PaCa2	0	Rep1	0.952544	2.79375	0.859922	0.998741	0.888391	1.51732	0.82744	0.73099	0.892875	1.04528	1.49241
MIA PaCa2	0	Rep1	0.583379	0	0.400391	1.2498	0.897893	1.02895	0.658759	1.11835	0.96132	0.7814	0.623897
MIA PaCa2	0	Rep1	1.76478	0	0.534308	1.02301	0.845278	1.33397	1.46882	0.989223	0.997863	1.20465	0.886617
MIA PaCa2	0	Rep1	1.25639	0	0.399711	1.14452	0.817818	1.42536	0.638023	0.947719	1.01404	1.32537	1.37081
MIA PaCa2	0	Rep1	1.22438	0	0.359604	1.0443	1.48446	2.04684	0.730341	1.1341	0.951639	1.0663	1.3258
MIA PaCa2	0	Rep1	1.62782	5.51862	0.482645	1.03042	0.912403	1.60092	0.773612	1.03469	0.891614	1.08608	0.773796
MIA PaCa2	0	Rep1	1.49376	0	0.49488	0.934638	0.903243	0.96742	1.33301	0.927617	0.881737	1.1543	0.54047
MIA PaCa2	0	Rep1	1.58708	2.39078	0.808259	0.893319	0.986238	1.6501	1.33357	0.715198	0.894657	1.08803	0.833712
MIA PaCa2	0	Rep1	1.46313	0	0.665505	1.06051	0.622179	1.77091	0.803672	0.802039	0.984668	1.26045	1.01057
MIA PaCa2	0	Rep1	1.0146	0	0.450695	1.17942	0.556482	0.58716	0.631499	0.888423	1.04299	0.8401	0.893397
MIA PaCa2	0	Rep1	0.766079	1.56677	0.933338	1.04839	1.02853	1.44987	0.949545	0.850231	0.956044	1.08394	0.986776
MIA PaCa2	0	Rep1	1.0201	0	0.36912	1.13925	0.579844	1.76542	0.894733	0.86487	1.0558	1.06924	0.989401
MIA PaCa2	0	Rep1	0.864142	0	0.409227	0.878572	0.967124	1.16839	1.27392	1.10196	0.991943	0.82823	0.756188
MIA PaCa2	0	Rep1	1.37971	0	0.255597	0.966795	0.598462	0.575598	0.803721	0.860511	0.927748	1.13175	1.21707
MIA PaCa2	0	Rep1	0.748641	0	1.04006	0.792139	0.902847	0.992776	1.9123	1.05929	0.8325	1.1033	0.712333
MIA PaCa2	0	Rep1	0.705175	0	0.426222	1.20582	0.633287	1.3741	0.600982	0.789867	1.025	1.00965	0.793922
MIA PaCa2	0	Rep1	1.06087	0	0.252198	1.11485	1.28556	1.26712	0.726282	1.11496	0.914316	0.713469	0.918903
MIA PaCa2	0	Rep1	1.12402	1.78209	0.791264	1.0471	1.01494	2.3444	1.0132	0.741846	0.965507	1.02796	1.27172
MIA PaCa2	0	Rep1	1.68123	2.05974	0.507116	0.991253	0.749501	2.47386	1.10525	0.984894	1.05866	1.36138	1.31818
MIA PaCa2	0	Rep1	0.770755	0	0.594807	1.14041	1.10544	1.617	0.722482	0.999058	0.959659	0.961367	1.06236
MIA PaCa2	0	Rep1	0.74502	0	0.447296	0.950012	0.99737	1.91264	1.30158	1.03524	1.02865	1.59272	1.42054
MIA PaCa2	0	Rep1	0.510022	0	0.487403	1.12823	0.861062	0.940929	0.687429	1.08853	0.917714	0.880725	0.633043
MIA PaCa2	0	Rep1	0.892617	0	0.449334	1.06138	0.858168	0.951121	0.824061	1.02995	1.03295	0.950505	1.35672
MIA PaCa2	0	Rep1	0.639889	2.93985	1.0659	0.736388	0.443691	0.24348	1.23939	0.904457	1.0463	0.960042	1.24456
MIA PaCa2	0	Rep1	0.767364	3.58476	0.641033	1.03712	1.0791	1.41438	0.690166	1.11331	0.915986	0.780154	1.25063
MIA PaCa2	0	Rep1	1.09724	0	0.575774	1.0817	1.04927	1.14351	0.71749	0.882235	1.02048	0.787199	1.15675
MIA PaCa2	0	Rep1	1.47108	0	0.416706	0.942159	0.879382	1.40126	0.990701	0.978546	0.975514	1.14257	1.49159
MIA PaCa2	0	Rep1	0.718229	0	0.381357	0.960505	0.723815	0.709713	1.44387	1.19251	0.852833	0.722062	1.02804
MIA PaCa2	0	Rep1	0.687924	0	0.807579	0.930161	0.495794	0.399926	0.993778	0.779995	0.909884	0.707205	0.966704
MIA PaCa2	0	Rep1	1.02309	0	0.755237	0.973539	0.836076	0.505878	1.16115	0.781116	0.953353	0.823903	0.782893
MIA PaCa2	0	Rep1	0.87793	0	1.23448	0.841459	0.765634	0.708115	1.65085	0.884018	1.04849	1.09604	0.531123
MIA PaCa2	0	Rep1	1.21052	0	1.07541	0.768456	0.609381	1.51226	1.04421	0.846378	0.848911	1.27859	1.45626
MIA PaCa2	0	Rep1	0.894147	0.591742	0.52955	1.12856	0.968926	0.697885	0.649214	0.873157	0.920603	0.830094	0.774512
MIA PaCa2	0	Rep1	1.05728	0	0.524111	0.947508	0.61491	0.628294	0.731761	1.02381	0.80685	0.948467	0.648996
MIA PaCa2	0	Rep1	1.6129	2.29463	0.614522	1.08812	0.861382	0.977422	0.896028	0.957154	0.84564	0.759907	0.624748
MIA PaCa2	0	Rep1	0.436887	1.03934	1.25623	1.04467	0.340605	0.267108	0.683945	0.953891	0.964601	0.975839	0.457357
MIA PaCa2	0	Rep1	1.16603	0	0.532268	1.14566	0.820414	0.61892	0.586602	0.581027	0.984982	0.746173	1.00741
MIA PaCa2	0	Rep1	0.763997	6.25846	0.726006	0.976749	0.68518	0.975824	1.09651	0.841617	0.968642	0.975603	0.605223
MIA PaCa2	0	Rep1	0.420424	2.44609	1.98563	0.735129	0.29345	0.189403	0.868815	0.760019	1.02039	0.903029	1.05818
MIA PaCa2	0	Rep1	0.596357	4.31163	1.80482	0.890811	0.467642	0.162824	1.16243	0.63646	0.818716	0.866497	0.928177
MIA PaCa2	0	Rep1	0.666108	3.81466	1.46493	0.722308	0.511229	0.371999	1.12224	0.706566	0.861211	0.954384	1.21391
MIA PaCa2	0	Rep1	0.98387	0	0.704933	1.01472	0.918054	1.81662	1.06533	0.772659	0.994207	0.83352	0.812955
MIA PaCa2	0	Rep1	0.82005	0	0.273951	0.978531	0.86712	1.3609	0.951485	1.11218	0.814476	1.35018	0.999737
MIA PaCa2	0	Rep1	0.99098	0	0.798743	0.826164	1.09792	2.08776	1.23656	0.84656	0.9729	0.841206	1.09088
MIA PaCa2	0	Rep1	0.896021	0	0.441857	1.03771	1.40019	1.60604	0.71237	0.932507	0.933382	1.01853	0.45181
MIA PaCa2	0	Rep1	0.250856	0	0.805539	0.639758	0.380209	0.309692	1.15616	0.930497	0.920849	0.984115	0.614882
MIA PaCa2	0	Rep1	0.748816	7.41819	2.30921	0.620651	0.561022	0.649126	1.04068	0.532507	0.85564	0.881497	0.997975
MIA PaCa2	0	Rep1	1.38528	0	0.564218	1.13106	0.881138	1.31067	0.811598	0.667299	1.01507	1.14297	0.74261
MIA PaCa2	0	Rep1	1.09119	0	1.64438	0.83806	0.539331	1.02427	1.46862	0.945936	0.81538	1.2831	0.647966
MIA PaCa2	0	Rep1	1.62748	0	0.321536	1.14888	0.754697	1.26325	0.792269	1.06693	0.992266	1.23588	0.734111
MIA PaCa2	0	Rep1	2.31653	0	0.363003	1.25462	0.897603	3.37599	0.603954	0.487075	0.767926	1.27962	0.515596
MIA PaCa2	0	Rep1	1.13458	0	0.886434	1.15057	0.466476	1.12779	0.694925	0.886268	0.877903	1.33017	0.813663
MIA PaCa2	0	Rep1	1.3619	0	0.83681	0.982651	0.546823	1.45065	1.10454	0.799679	0.970529	1.19608	0.687468
MIA PaCa2	0	Rep1	1.56607	5.53211	0.840209	0.820675	0.653743	1.83096	1.71786	0.760618	1.00599	1.32475	0.59459
MIA PaCa2	0	Rep1	1.86166	1.43726	0.399711	1.24855	0.440586	1.15149	0.555538	0.605023	1.08735	1.01661	1.74557
MIA PaCa2	0	Rep1	2.26857	7.88729	0.536346	1.07257	1.14037	2.06078	1.024	0.916547	1.06255	0.979903	1.34212
MIA PaCa2	0	Rep1	2.79919	4.40317	0.34397	1.25504	0.866737	3.67954	0.553811	0.519317	1.04187	1.21923	1.64697
MIA PaCa2	0	Rep1	2.06078	0	0.382716	1.18128	0.516467	2.21221	0.589779	0.584906	1.04898	0.987119	1.31149
MIA PaCa2	0	Rep1	1.90201	0	0.428262	1.11399	1.06629	1.86816	0.657999	0.624389	1.03872	1.15247	1.53435
MIA PaCa2	0	Rep1	0.937102	0	0.853805	1.03816	0.576081	0.450657	0.861423	0.546485	0.964688	0.763011	1.0668
MIA PaCa2	0	Rep1	1.27121	0	0.953732	1.01893	0.622297	3.02158	1.11391	0.739711	1.05361	1.23765	1.54738
MIA PaCa2	0	Rep1	0.24685	0.693866	2.18278	0.626153	0.329632	0.195382	0.856189	0.802844	0.948319	0.871034	0.696805
MIA PaCa2	0	Rep1	0.484657	2.28591	1.46221	0.882754	0.599865	0.442059	1.28601	0.949831	0.719485	0.909236	0.745241
MIA PaCa2	0	Rep1	0.360757	0	1.32965	0.697732	0.515624	0.278338	1.84233	0.798825	0.857104	0.873471	0.518067
MIA PaCa2	0	Rep1	0.213415	1.89147	6.43345	0.856486	0.257908	0.156411	0.706521	0.8641	0.816407	0.913251	0.782339
MIA PaCa2	0	Rep1	1.33569	0	1.0489	1.22311	0.623342	1.11661	0.834452	0.677624	0.944094	1.13932	0.463639
MIA PaCa2	0	Rep1	0.340565	1.10114	3.93661	0.8773	0.372548	0.234387	0.870525	0.842589	0.775706	0.91607	0.912569
MIA PaCa2	0	Rep1	0.881297	3.41163	1.17874	1.02846	0.457297	0.315238	0.666514	0.507649	1.05159	0.834558	0.560877
MIA PaCa2	0	Rep1	1.63013	0	0.554021	1.21668	0.706914	1.02492	0.728877	0.636432	0.896537	0.638263	0.730396
MIA PaCa2	0	Rep1	0.836698	0.330206	0.948974	1.09523	0.502028	0.632906	0.870057	0.589856	0.885157	0.748733	0.995027
MIA PaCa2	0	Rep1	1.32871	2.81938	0.370481	1.06336	0.665897	1.9946	0.81843	0.742217	1.03111	1.29123	0.712763
MIA PaCa2	0	Rep1	1.191	0	0.338531	1.03533	0.580223	0.215175	0.789955	0.773316	0.872702	0.527591	0.927345
MIA PaCa2	0	Rep1	0.86999	0	0.333093	1.1552	1.00982	1.38893	0.747863	1.0286	0.933505	0.894758	0.610168
MIA PaCa2	0	Rep1	0.786732	3.72749	0.504398	0.988028	0.993952	0.88248	1.29166	1.22116	0.979451	1.13691	0.722211
MIA PaCa2	0	Rep1	0.944079	4.97506	0.640353	0.827825	0.55854	0.402587	1.05307	0.467321	1.01514	0.819412	1.15894
MIA PaCa2	0	Rep1	1.10152	0	0.414666	0.998459	1.13974	0.89432	1.04926	0.843133	0.997341	1.1352	1.26287
MIA PaCa2	0	Rep1	1.31832	0	0.508476	1.11504	0.761271	0.804382	0.78308	0.998528	0.970879	1.19378	0.799517
MIA PaCa2	0	Rep1	0.616804	0	0.273272	1.05764	0.831367	0.557317	1.20133	1.06981	1.00017	1.07028	0.779715
MIA PaCa2	0	Rep1	1.19452	0	0.428942	0.994419	1.22354	0.939369	1.04193	1.01884	1.05204	1.11311	0.943069
MIA PaCa2	0	Rep1	0.738869	0	0.445256	1.12524	0.54351	0.815246	0.77465	1.05414	0.927557	1.14188	0.797362
MIA PaCa2	0	Rep1	1.68191	0	0.40311	1.1834	0.914379	0.857498	0.699054	0.93858	1.05428	1.12679	1.02237
MIA PaCa2	0	Rep1	1.64407	0	0.456813	1.20503	0.699484	1.78168	0.604536	0.837581	1.02107	1.3151	0.764169
MIA PaCa2	0	Rep1	1.46097	14.908	0.753197	0.980669	0.99487	1.21011	0.905775	0.711556	0.951286	1.12091	1.21166
MIA PaCa2	0	Rep1	0.680809	0	0.288227	1.25202	0.586032	1.0314	0.708822	1.08068	1.06724	1.06121	0.81855
MIA PaCa2	0	Rep1	0.643069	2.21761	1.05978	0.958665	0.293088	0.339328	0.881195	0.842841	1.04187	0.946135	1.28981
MIA PaCa2	0	Rep1	1.62969	10.6936	0.503037	1.05638	0.934953	1.48518	1.12317	0.813712	1.01383	1.48755	1.09964
MIA PaCa2	0	Rep1	1.52166	0	0.337172	1.09487	0.902544	1.15655	0.88591	1.04358	1.04405	1.14738	1.03392
MIA PaCa2	0	Rep1	2.23758	4.32668	0.446616	1.15747	0.696244	1.65233	0.677017	0.909407	1.07332	1.53415	1.4499
MIA PaCa2	0	Rep1	1.32477	0	0.36912	1.0048	0.812951	0.755744	0.850454	0.83126	1.01684	1.32886	1.12983
MIA PaCa2	0	Rep1	1.18095	0.641123	0.977525	1.04231	0.796809	1.23558	1.13147	0.654722	0.849939	1.3096	0.992726
MIA PaCa2	0	Rep1	1.27524	0	0.241322	0.995488	0.856142	1.20698	1.14086	0.868432	0.834903	1.64396	1.41173
MIA PaCa2	0	Rep1	1.12557	0	0.496239	0.897105	0.668618	1.20668	1.26519	0.966597	0.965355	1.36623	0.951689
MIA PaCa2	0	Rep1	1.24921	5.32706	0.441177	1.09042	0.976891	1.47826	0.769676	0.871828	0.86702	0.970351	1.40364
MIA PaCa2	0	Rep1	0.808388	0	0.263075	1.00021	1.35285	1.0269	0.823722	1.1734	0.978624	1.26717	1.23665
MIA PaCa2	0	Rep1	0.849223	0	0.421464	1.10338	1.17015	1.19892	0.738815	1.12068	0.985592	1.53939	1.24668
MIA PaCa2	0	Rep1	1.17227	5.54869	0.734163	0.992324	0.951955	1.4206	0.961116	0.94651	0.916608	1.06226	0.739293
MIA PaCa2	0	Rep1	1.16657	0	0.596847	1.10501	0.990119	0.806082	0.782336	0.78868	0.815309	0.971395	0.933225
MIA PaCa2	0	Rep1	1.58206	0	0.234523	1.1054	1.06448	1.49944	0.952839	1.14477	0.95298	0.703779	0.631356
MIA PaCa2	0	Rep1	1.57879	0	0.456132	1.17202	0.708182	1.2979	0.602966	0.891697	0.991341	1.19397	0.803088
MIA PaCa2	0	Rep1	1.76896	0	0.377279	0.896538	0.691802	1.71848	1.63724	0.754359	0.871292	1.2607	1.10988
MIA PaCa2	0	Rep1	1.52653	4.60968	0.747758	0.967742	0.723139	1.15136	1.43543	0.882663	0.933005	1.15509	0.740632
MIA PaCa2	0	Rep1	2.13079	2.03182	0.411267	1.26963	0.561863	0.561877	0.533076	0.533105	1.04725	0.485583	0.954921
MIA PaCa2	0	Rep1	0.398562	2.8006	3.18884	0.857994	0.355155	0.173239	0.824748	0.77429	0.841813	0.896398	0.744121
MIA PaCa2	0	Rep1	1.54625	2.49341	0.670263	1.19606	0.515599	0.540119	0.734062	0.561926	1.01065	0.644387	1.02362
MIA PaCa2	0	Rep1	1.35611	1.86734	0.783107	1.22785	0.882733	1.24637	0.705652	0.990128	1.05084	1.05746	0.773904
MIA PaCa2	0	Rep1	0.623357	0	0.688617	0.991164	0.700861	0.525313	1.00872	1.13008	0.719836	0.800054	0.984837
MIA PaCa2	0	Rep1	0.805688	0	0.524111	1.08262	0.663208	0.755541	0.860801	0.908692	0.932021	0.704797	0.915609
MIA PaCa2	0	Rep1	0.329729	1.10867	1.74296	0.946783	0.375889	0.337093	0.768611	1.13291	0.976837	0.918078	1.30966
MIA PaCa2	0	Rep1	0.683397	2.47262	0.887114	0.915571	1.28242	0.943415	0.899915	1.07554	0.842682	0.675253	0.821298
MIA PaCa2	0	Rep1	0.507695	0	1.33713	0.851501	0.456935	0.220078	1.18734	0.789336	0.675493	0.87007	0.496085
MIA PaCa2	0	Rep1	0.875767	0	0.34125	1.01141	0.480532	0.208337	1.05204	0.95488	0.973999	0.810609	0.899546
MIA PaCa2	0	Rep1	0.645146	0	0.473127	0.97198	1.08083	0.983846	1.27816	1.05115	0.99291	0.816334	0.82176
MIA PaCa2	0	Rep1	0.869925	2.99266	1.06454	1.0697	0.823427	0.973426	0.89605	0.949343	0.971542	0.861221	0.693306
MIA PaCa2	0	Rep1	0.869998	0	0.781068	0.808575	0.666508	0.591801	1.18806	0.882909	0.951322	1.10715	1.38341
MIA PaCa2	0	Rep1	1.30383	0	0.394953	1.10518	0.877394	0.95896	0.945377	1.03961	0.973909	0.848342	0.400352
MIA PaCa2	0	Rep1	0.569188	0	0.810978	1.07221	0.89464	1.10007	0.851317	0.998035	0.845147	0.766986	0.801557
MIA PaCa2	0	Rep1	0.888754	0	0.485363	1.15418	0.834372	0.546471	0.65316	1.19264	1.06554	0.98874	1.06889
MIA PaCa2	0	Rep1	1.55404	0.528028	0.593448	1.13888	0.971533	1.07053	0.930695	0.756309	0.912342	0.9365	0.818489
MIA PaCa2	0	Rep1	1.3869	0	0.708332	1.12289	1.01536	0.951463	0.844195	0.759795	0.883468	0.950973	0.721247
MIA PaCa2	0	Rep1	1.37096	0	0.46361	0.993892	1.33812	0.990106	0.907488	1.10634	1.02626	0.801765	1.11191
MIA PaCa2	0	Rep1	0.700561	0	0.422823	1.01037	0.875801	1.39339	1.13899	0.883232	0.891614	0.987946	1.0064
MIA PaCa2	0	Rep1	1.00233	0	0.425543	0.832616	0.730323	1.10784	1.19726	1.17763	0.981773	1.05398	0.424178
MIA PaCa2	0	Rep1	0.498641	1.49763	1.39491	0.823995	0.436606	0.308555	0.978167	0.750056	0.933287	0.897935	1.2887
MIA PaCa2	0	Rep1	0.814004	0	0.516633	1.00247	0.818747	0.640025	1.01071	1.07479	1.01115	1.2368	0.500353
MIA PaCa2	0	Rep1	0.547448	1.01004	1.60292	0.807993	0.608038	0.571372	1.31148	0.765956	0.861211	1.07256	1.40163
MIA PaCa2	0	Rep1	0.960801	1.60924	1.00607	0.693025	0.98617	0.579211	1.13298	0.973718	1.00578	0.956901	1.00151
MIA PaCa2	0	Rep1	0.987554	2.09056	0.499638	1.09023	1.20092	0.688359	0.709511	0.966032	1.02597	0.779884	0.550909
MIA PaCa2	0	Rep1	0.0620161	0	1.17738	0.733948	0.195983	0.0715624	1.58205	1.04159	1.00969	0.937214	0.0453074
MIA PaCa2	0	Rep1	0.590406	0	0.40311	1.25478	0.738192	0.606445	0.682976	1.01951	1.07129	0.829524	1.13665
MIA PaCa2	0	Rep1	1.62889	0	0.426902	1.09729	1.04004	1.66317	0.76571	0.699703	1.02284	1.01341	0.877289
MIA PaCa2	0	Rep1	1.1747	5.05572	1.10532	0.948062	0.949147	0.615937	1.36777	0.803927	0.955236	0.801607	0.964888
MIA PaCa2	0	Rep1	1.05016	0	0.90071	0.976925	1.07095	0.949142	0.890086	0.968797	0.809309	1.01885	0.866868
MIA PaCa2	0	Rep1	1.20642	0	0.445256	1.0689	1.16411	1.75251	0.750601	1.00789	1.07601	0.948622	1.19829
MIA PaCa2	0	Rep1	1.34935	0	0.723966	1.02128	1.34757	0.49722	0.898362	0.959818	0.866379	0.85271	0.481039
MIA PaCa2	0	Rep1	0.799212	0	0.598887	1.11959	0.896346	0.803222	0.934007	1.01411	1.09265	1.00105	0.756086
MIA PaCa2	0	Rep1	1.39658	0	0.43302	1.25227	1.08873	1.25123	0.724955	0.970632	1.07529	1.47278	1.02395
MIA PaCa2	0	Rep1	1.49063	0	0.363003	1.21597	0.966567	1.27239	0.765423	0.72993	1.04373	1.50544	0.920496
MIA PaCa2	0	Rep1	1.59706	1.57434	0.4976	0.766252	0.718917	0.584105	1.96736	0.913915	0.985882	1.39148	0.497376
MIA PaCa2	0	Rep1	0.453804	0	0.754556	0.900167	0.687185	0.580368	1.61708	1.10386	1.03705	1.10732	0.333914
MIA PaCa2	0	Rep1	0.583546	0	0.1883	1.00092	0.886312	0.549634	0.87547	1.07008	0.953379	0.964301	0.716467
MIA PaCa2	0	Rep1	0.870218	2.09056	0.599567	1.02775	0.399888	0.30419	0.926838	0.788144	1.0185	0.637726	1.02785
MIA PaCa2	0	Rep1	1.44468	0	0.785147	0.94581	0.904131	0.830912	1.04981	0.936527	0.971619	0.97807	0.582599
MIA PaCa2	0	Rep1	1.21729	3.81629	0.520032	1.05294	1.21188	0.851536	0.635084	0.839447	0.994747	0.855419	1.21623
MIA PaCa2	0	Rep1	1.15477	0	0.394272	1.22018	0.970993	0.898538	0.607514	1.0983	0.953169	1.03319	0.792791
MIA PaCa2	0	Rep1	0.779601	0	0.40311	1.08876	0.847401	0.563595	0.766164	0.966193	1.05502	1.2474	0.862912
MIA PaCa2	0	Rep1	1.29386	0	0.664146	1.0486	0.881552	0.59365	0.978006	0.903562	1.08261	1.05813	0.996951
MIA PaCa2	0	Rep1	0.921373	0	0.578493	0.975096	1.07581	0.885378	0.968881	1.18488	0.973545	0.959502	0.601719
MIA PaCa2	0	Rep1	0.880308	0	0.824574	1.20253	0.68081	0.584933	0.637358	0.852408	0.990502	1.13229	0.5185
MIA PaCa2	0	Rep1	0.585722	0	0.259676	1.05943	0.841512	0.453037	0.730327	1.1279	1.01475	0.960572	0.505678
MIA PaCa2	0	Rep1	1.34854	1.43482	0.400391	1.17865	1.02757	1.72613	0.651016	0.957617	1.03954	1.24084	1.26343
MIA PaCa2	0	Rep1	1.41588	0	0.687258	1.03879	0.925232	1.03127	0.964797	0.699168	1.07121	1.33191	0.86449
MIA PaCa2	0	Rep1	0.96441	0	0.573735	1.15562	0.879052	1.08741	0.694009	0.746697	0.991453	0.928788	0.669517
MIA PaCa2	0	Rep1	1.28497	0	0.592769	1.08849	1.40256	1.39835	0.882322	0.79549	1.01922	0.954685	0.780246
MIA PaCa2	0	Rep1	0.673313	0	0.305901	0.958776	0.703412	0.64293	0.991208	1.12594	0.96941	1.20257	0.483625
MIA PaCa2	0	Rep1	1.18633	0	0.580533	1.17735	1.0163	0.894517	0.810147	1.15746	0.922991	1.18545	0.999422
MIA PaCa2	0	Rep1	0.780654	0	0.614522	0.766382	0.544881	0.363219	1.5591	0.710101	1.00981	0.772737	1.05753
MIA PaCa2	0	Rep1	1.26996	0	0.299783	1.1374	1.27539	1.60263	0.844118	1.20463	1.03593	1.28396	1.29816
MIA PaCa2	0	Rep1	0.88729	0	0.416025	1.03912	0.961719	1.68441	1.03025	1.08829	0.997678	0.870886	0.761619
MIA PaCa2	0	Rep1	0.49732	2.0556	1.01627	0.948938	0.814418	1.13243	1.21562	1.0947	1.01694	1.05491	1.01873
MIA PaCa2	0	Rep1	1.52317	0	0.420785	1.11713	0.922216	1.06442	0.82573	1.0226	0.975364	0.957029	1.07518
MIA PaCa2	0	Rep1	1.38533	0	0.520712	1.09114	0.912534	1.95674	0.96816	0.54949	0.833347	1.38444	1.70173
MIA PaCa2	0	Rep1	1.41368	0	0.457493	1.17408	1.24087	1.07377	0.919624	0.895007	1.05609	1.11637	1.07861
MIA PaCa2	0	Rep1	0.787036	0	0.569657	1.04007	0.989185	1.01115	0.801377	0.960278	1.04574	1.03326	0.90468
MIA PaCa2	0	Rep1	1.26173	0	0.481964	1.08001	1.24787	1.14127	0.767101	1.02775	1.02533	0.948585	1.29738
MIA PaCa2	0	Rep1	1.97617	0	0.406509	1.20654	0.891373	1.41416	0.627354	0.869796	1.0735	1.36533	1.02271
MIA PaCa2	0	Rep1	1.82027	0	0.523431	1.14822	0.544101	0.956784	1.08641	0.826208	1.04734	1.59219	1.13148
MIA PaCa2	0	Rep1	1.26773	0	0.52683	1.1813	0.790625	1.69449	0.712472	0.972309	1.03789	1.35343	1.36767
MIA PaCa2	0	Rep1	0.505584	0	1.15631	1.00949	0.620958	0.480274	0.905601	1.17107	0.768118	0.963685	0.291439
MIA PaCa2	0	Rep1	1.02861	0	0.936057	0.810256	1.03878	0.536412	1.39233	0.899922	0.959059	0.839834	0.672113
MIA PaCa2	0	Rep1	0.496578	0	0.979563	0.862956	0.867997	0.483257	1.1622	1.00174	0.755036	0.824155	0.492877
MIA PaCa2	0	Rep1	0.467183	0	1.13795	0.899984	0.462855	0.333338	1.05591	0.865347	0.906776	0.869604	0.713932
MIA PaCa2	0	Rep1	0.81558	0	1.4928	1.00332	0.801596	0.455422	0.956309	0.879896	0.936415	0.869167	0.578051
MIA PaCa2	0	Rep1	0.821607	0	1.34121	0.890075	0.963177	0.527978	0.920475	1.12815	0.899729	0.815111	0.545089
MIA PaCa2	0	Rep1	0.248732	0	0.551982	1.10365	0.753659	0.510721	0.760669	1.18907	1.0155	0.87226	0.454322
MIA PaCa2	0	Rep1	0.906574	0	0.692016	1.1076	0.792676	0.495611	1.01721	1.13466	1.05147	0.993781	0.866291
MIA PaCa2	0	Rep1	0.793295	0	0.577814	1.12107	1.06722	0.635174	0.735441	0.937487	1.04887	1.10725	0.956792
MIA PaCa2	0	Rep1	1.13508	0	0.611802	1.1727	1.1588	1.00439	0.580815	0.895474	1.04385	0.73364	1.65241
MIA PaCa2	0	Rep1	1.72735	0	0.477885	1.25432	0.492767	0.978766	0.630358	0.70047	1.06544	0.712676	1.30666
MIA PaCa2	0	Rep1	2.09324	3.27702	0.573735	1.22662	1.1187	1.39349	0.695974	0.632013	1.08214	1.2035	1.86988
MIA PaCa2	0	Rep1	1.40819	0	0.592769	1.05368	0.803059	1.16525	1.11051	0.716573	1.02881	1.20311	0.950019
MIA PaCa2	0	Rep1	0.794048	0	0.394272	1.07432	0.802581	1.24073	0.852664	1.16029	1.00397	1.03452	1.14861
MIA PaCa2	0	Rep1	1.62918	0	0.317457	1.08801	0.818256	0.694847	1.06964	0.941437	0.937663	0.826251	1.35324
MIA PaCa2	0	Rep1	1.28307	0	0.517313	1.18337	0.770909	2.05479	0.750092	0.461524	0.95298	0.760985	0.76908
MIA PaCa2	0	Rep1	1.64296	0	0.359604	1.2092	0.718041	2.63993	0.697429	0.750589	0.835287	1.32541	0.810015
MIA PaCa2	0	Rep1	1.50858	0	0.446616	1.1731	0.74932	0.928828	0.727494	0.855048	0.99889	0.380062	1.14901
MIA PaCa2	0	Rep1	1.12219	5.18775	1.05706	1.09124	0.770537	1.47937	0.730708	0.61418	0.935498	0.944305	2.33456
MIA PaCa2	0	Rep1	0.879536	2.15449	1.13931	0.876805	1.45435	0.890268	1.39128	0.858315	0.807056	0.802709	0.782808
MIA PaCa2	0	Rep1	0.472617	0.553382	0.566258	1.03635	1.16777	0.914267	0.830571	1.05324	0.822642	0.709286	0.425212
MIA PaCa2	0	Rep1	0.817055	0	0.645111	1.11981	1.18331	1.0498	0.675318	0.888867	0.894657	0.787654	1.25174
MIA PaCa2	0	Rep1	0.97137	0	0.578493	1.20313	0.735007	0.975747	0.693659	0.780427	0.93801	0.877759	1.32087
MIA PaCa2	0	Rep1	0.357748	1.75998	2.13655	0.755576	0.494794	0.339023	1.43499	0.815627	0.892166	0.910386	0.46183
MIA PaCa2	0	Rep1	0.340679	0.198181	3.16233	0.728184	0.561361	0.35625	1.15603	0.979872	0.755995	0.898339	0.536288
MIA PaCa2	0	Rep1	0.873833	0	1.13183	0.948017	0.841069	1.04755	1.21225	0.814844	0.984681	0.909848	0.79697
MIA PaCa2	0	Rep1	0.833172	4.76891	1.29226	0.781944	0.394454	0.3678	0.844779	0.56076	0.927838	0.978189	0.832019
MIA PaCa2	0	Rep1	0.945421	0.384861	1.08561	1.08204	0.823119	1.565	1.00974	0.819926	0.997793	0.896204	1.03051
MIA PaCa2	0	Rep1	1.24105	0	1.21953	0.72497	0.845579	1.29215	1.33212	0.789453	0.815465	0.949842	1.01591
MIA PaCa2	0	Rep1	2.00055	0	0.363683	0.957072	0.669085	2.7537	1.3056	0.769368	0.769181	1.13222	1.27611
MIA PaCa2	0	Rep1	0.999672	0	0.690657	0.947821	0.567921	1.76576	1.18691	0.828635	0.815593	1.11158	0.888502
MIA PaCa2	0	Rep1	1.24033	0	0.382037	1.12987	0.714958	2.06307	0.864484	0.98509	1.02726	1.65254	1.01344
MIA PaCa2	0	Rep1	1.37509	11.2717	0.579173	1.07358	0.728555	1.78909	0.870435	0.617398	1.0551	1.5011	1.24598
MIA PaCa2	0	Rep1	1.5141	3.01102	1.11008	0.846183	0.910861	1.5014	1.21265	0.654607	0.960035	1.08398	1.34105
MIA PaCa2	0	Rep1	1.29407	0	0.564218	0.853183	0.569253	1.32332	1.06731	0.76583	0.966877	1.82804	0.891042
MIA PaCa2	0	Rep1	1.17906	0	0.313379	1.01653	1.02889	1.37903	1.16898	1.19343	1.06337	1.02433	0.921304
MIA PaCa2	0	Rep1	1.31915	0	0.319497	0.971142	0.865874	1.4002	0.9358	0.888481	0.862267	1.69079	1.38385
MIA PaCa2	0	Rep1	0.77504	0	0.288227	1.09268	1.62286	2.47763	0.658961	1.10882	0.983385	0.687425	1.86914
MIA PaCa2	0	Rep1	1.32739	0	0.423503	0.929339	1.05107	2.71048	1.47451	1.00533	0.868	1.17984	1.09433
MIA PaCa2	0	Rep1	1.32045	0	0.40311	1.16665	1.01999	1.28299	0.741696	0.95685	0.975377	0.822729	1.6727
MIA PaCa2	0	Rep1	0.995386	0	1.21477	1.0243	0.654415	1.03354	0.935787	0.859896	0.919953	1.20766	1.12206
MIA PaCa2	0	Rep1	1.8542	4.86131	0.547904	1.23935	0.911544	3.44075	0.681469	0.523753	0.995029	1.31244	1.7356
MIA PaCa2	0	Rep1	1.17524	0.576787	0.452733	1.0031	0.781519	1.64091	1.07867	0.739873	0.974316	1.11846	0.838068
MIA PaCa2	0	Rep1	1.33935	5.16318	1.26439	0.998303	0.892726	2.02288	1.42859	0.717713	0.863827	0.883715	1.31339
MIA PaCa2	0	Rep1	1.19279	2.48366	0.946254	0.982124	0.872547	1.82049	0.830269	0.757066	0.913417	1.40527	1.45848
MIA PaCa2	0	Rep1	1.18432	0	0.388835	1.09486	0.937757	1.30756	0.807337	1.00401	0.968904	0.815522	1.19316
MIA PaCa2	0	Rep1	0.936893	0	0.394953	1.10518	0.512691	0.91407	0.91113	0.772165	0.951776	0.861348	1.17618
MIA PaCa2	0	Rep1	0.762937	0	0.759315	1.00333	0.634743	1.09069	1.07253	0.712041	0.958326	0.936075	1.18677
MIA PaCa2	0	Rep1	0.204829	0.140917	1.85308	0.838008	0.199842	0.0935785	1.16332	0.945184	0.88075	0.835212	1.52088
MIA PaCa2	0	Rep1	0.362099	0	1.27323	0.913117	0.357263	0.332938	1.0971	0.916819	0.84568	0.948466	1.38565
MIA PaCa2	0	Rep1	1.92439	0	0.40107	1.23255	0.439212	1.03789	0.567708	0.632979	1.05145	0.522163	0.914123
MIA PaCa2	0	Rep1	0.250068	2.58131	4.95696	0.700681	0.321079	0.203045	0.918273	0.824243	0.80855	0.927048	1.43096
MIA PaCa2	0	Rep1	0.961774	1.17849	1.15223	1.12914	0.747169	1.0514	0.706795	0.906392	0.862232	1.23296	0.972654
MIA PaCa2	0	Rep1	1.17757	5.78968	0.568296	1.14915	0.649486	1.65653	0.762137	1.02098	0.992448	1.30979	1.22434
MIA PaCa2	0	Rep1	1.39679	0	0.442538	0.901718	0.622291	1.28012	1.48304	0.96747	0.98576	1.39117	0.852937
MIA PaCa2	0	Rep1	1.52371	0	0.344649	1.14333	1.12599	0.819902	0.681087	0.968129	1.0411	1.18881	1.07246
MIA PaCa2	0	Rep1	0.869164	1.7274	0.634914	1.06348	0.978018	0.915383	0.874349	0.867016	0.946852	1.0131	0.877704
MIA PaCa2	0	Rep1	0.318351	0	0.293666	1.18087	0.949402	0.88671	0.746554	1.10659	1.08154	0.834411	1.35805
MIA PaCa2	0	Rep1	0.911273	0	0.298424	1.09824	1.97381	1.70664	0.726151	0.977825	0.879323	0.821412	0.825808
MIA PaCa2	0	Rep1	0.371246	0	0.388835	0.959859	0.93076	0.664906	1.20594	1.24411	1.0279	0.917683	0.565994
MIA PaCa2	0	Rep1	0.496074	0	0.49556	1.07199	1.16778	0.854079	0.85751	1.08459	1.03267	0.712752	1.225
MIA PaCa2	0	Rep1	0.367933	0	0.30998	0.762231	0.961463	0.506992	1.64361	1.04022	0.925844	0.99847	0.494179
MIA PaCa2	0	Rep1	0.531046	0	0.422144	0.972845	0.837379	0.584817	0.814392	1.16951	0.993361	1.41418	0.646365
MIA PaCa2	0	Rep1	1.0548	2.1502	0.631517	0.931823	0.649924	0.624384	1.33376	0.859187	0.964279	1.43103	0.731065
MIA PaCa2	0	Rep1	0.646471	0	0.349407	1.17049	1.04598	0.630423	0.806496	1.18531	1.01188	0.939266	1.03098
MIA PaCa2	0	Rep1	1.17426	0	0.323576	1.10068	0.951168	1.00816	0.683641	1.10974	0.922644	0.65437	0.614476
MIA PaCa2	0	Rep1	1.09133	0	0.478566	0.978772	0.86437	0.85968	0.806702	0.930934	0.992448	1.14476	1.41032
MIA PaCa2	0	Rep1	0.909646	0	0.209373	0.993284	1.22246	0.408415	0.878877	1.05122	0.984484	0.952726	0.643337
MIA PaCa2	0	Rep1	1.48005	0	0.456813	1.12778	0.906259	0.860333	0.741482	0.922948	1.03721	1.15987	1.15561
MIA PaCa2	0	Rep1	0.999501	3.96701	0.394953	0.981414	1.08299	0.992548	1.18725	0.780592	1.00375	1.62729	1.04472
MIA PaCa2	0	Rep1	0.692859	0	0.177423	1.08822	1.1509	0.296496	0.794137	1.22767	1.03354	1.16337	0.57104
MIA PaCa2	0	Rep1	0.691159	0	0.534987	0.892625	1.03876	1.26329	1.23045	1.06111	1.04578	0.829121	0.772334
MIA PaCa2	0	Rep1	1.67404	4.93957	1.18418	0.68448	1.26264	1.37941	2.80658	1.09312	0.940533	1.2171	0.710527
MIA PaCa2	0	Rep1	0.577302	0	0.333093	1.08683	1.46556	1.17365	0.845999	1.23035	0.913535	0.918862	1.16514
MIA PaCa2	0	Rep1	1.06545	0	0.21277	1.14524	0.918028	1.4264	0.753587	1.09761	0.986666	0.751433	0.69449
MIA PaCa2	0	Rep1	1.10403	0	0.643073	0.822861	0.950645	0.833804	1.51136	1.18302	0.778832	1.27337	1.20073
MIA PaCa2	0	Rep1	1.15723	0	0.916344	1.0115	0.699106	0.781297	0.931175	0.847832	0.984151	1.33486	1.15014
MIA PaCa2	0	Rep1	0.708884	0	0.503717	1.17975	0.78074	1.27344	0.655655	1.06373	1.07089	0.977346	0.696386
MIA PaCa2	0	Rep1	0.668297	0	0.381357	1.03879	0.728731	1.16861	0.931789	1.09047	1.00116	1.18065	0.942323
MIA PaCa2	0	Rep1	1.49057	0	1.00607	0.929329	0.85363	1.04029	1.22906	0.99049	0.87639	1.16576	0.770564
MIA PaCa2	0	Rep1	1.63911	3.47463	0.541106	0.898901	0.971036	1.17825	1.42121	1.01065	0.974989	1.14721	0.882676
MIA PaCa2	0	Rep1	1.8655	0	0.318818	0.96986	1.00198	1.35224	1.00585	1.15692	0.793327	1.37891	1.43852
MIA PaCa2	0	Rep1	1.27262	0.540408	0.579852	1.12341	0.908823	1.83756	1.13767	1.01938	1.03949	1.28289	1.26076
MIA PaCa2	0	Rep1	1.3027	0	0.506436	1.01294	1.24621	0.948013	1.04887	0.874028	0.963904	0.799275	1.68054
MIA PaCa2	0	Rep1	1.41125	0	0.479246	1.20668	0.635046	1.33438	0.593879	0.941157	1.00146	1.25953	1.18967
MIA PaCa2	0	Rep1	1.79602	3.52221	0.474486	1.18389	0.665575	1.09258	0.870651	0.685306	1.04295	1.01117	1.79795
MIA PaCa2	0	Rep1	1.07015	1.59112	0.459531	1.14656	0.811564	0.673556	0.643271	0.896405	1.02691	1.3706	1.05323
MIA PaCa2	0	Rep1	1.27645	0	0.599567	1.12034	0.754261	1.46438	0.769389	0.819416	0.958919	0.802726	1.18509
MIA PaCa2	0	Rep1	1.44759	0	0.581213	1.17816	0.82866	1.17878	0.73114	0.774276	1.0274	1.05754	1.0994
MIA PaCa2	0	Rep1	1.2534	2.23598	0.583931	1.19541	0.864354	1.24158	0.803984	0.900821	0.98365	1.18727	1.01722
MIA PaCa2	0	Rep1	1.53267	4.69385	0.968007	0.821417	1.22327	1.14679	1.93354	0.803071	1.06653	1.25701	0.751384
MIA PaCa2	0	Rep1	1.39455	0	0.448655	1.1606	0.775219	1.62631	0.734865	1.00444	1.0668	0.87656	0.834128
MIA PaCa2	0	Rep1	1.1712	0	0.720567	0.938006	1.20218	1.11054	0.816564	0.743851	1.01466	1.06704	0.859133
MIA PaCa2	0	Rep1	0.234112	0	0.542465	1.15855	0.809404	0.788578	0.823883	1.2249	0.990502	1.00443	0.564388
MIA PaCa2	0	Rep1	0.763286	0	0.791945	0.97558	1.10489	0.908387	1.24255	0.931258	1.07332	0.994703	0.854115
MIA PaCa2	0	Rep1	0.904925	1.40968	1.9265	0.862035	0.845059	1.27381	1.67995	0.906955	0.949134	1.01007	0.80268
MIA PaCa2	0	Rep1	1.16695	5.08276	0.534308	1.20604	0.912658	0.988869	0.837516	0.947153	1.07691	1.06158	1.70521
MIA PaCa2	0	Rep1	0.828693	0	0.389514	1.09601	1.15875	0.900751	0.856569	1.12057	0.745815	0.613761	1.00063
MIA PaCa2	0	Rep1	0.250477	0	0.763394	0.946059	0.429931	0.283802	0.971933	1.08114	0.923437	0.742113	0.931009
MIA PaCa2	0	Rep1	0.637249	0	0.779708	0.86693	0.839574	0.733027	1.41673	0.995874	0.89839	0.775883	0.54583
MIA PaCa2	0	Rep1	0.189555	0.235858	5.09291	0.787985	0.244192	0.112225	0.961873	0.942799	0.962614	0.860266	0.818081
MIA PaCa2	0	Rep1	1.1538	3.7323	0.909546	1.16791	0.499606	0.592283	0.751624	0.605159	0.868897	0.684227	1.26152
MIA PaCa2	0	Rep1	0.460806	0	0.583931	0.980628	0.182248	0.0683919	0.741731	1.07479	1.08925	0.936385	0.0508011
MIA PaCa2	0	Rep1	0.996938	3.77368	0.539745	0.906605	0.456127	0.77401	0.943938	0.901288	0.881063	1.174	1.04248
MIA PaCa2	0	Rep1	1.38379	3.19606	0.424863	0.93118	0.926322	1.25043	1.04132	0.945659	0.888189	1.1035	0.912099
MIA PaCa2	0	Rep1	1.10828	0	0.473127	1.10845	0.840046	0.616242	0.960706	1.01556	0.960026	1.14835	0.981728
MIA PaCa2	0	Rep1	1.71688	0.616473	0.677741	1.02018	1.18546	1.28505	0.991651	0.731518	0.97858	1.01967	1.19087
MIA PaCa2	0	Rep1	1.4569	0	0.416025	1.05258	0.697163	1.31597	0.908329	0.77191	0.958244	0.871569	1.45404
MIA PaCa2	0	Rep1	1.9241	0	0.199856	1.19616	0.989864	0.609657	0.747298	0.947491	1.06062	0.513679	0.75974
MIA PaCa2	0	Rep1	1.0287	0	0.257637	1.17054	0.687259	0.594731	0.728451	0.946994	1.03295	1.21703	0.83953
MIA PaCa2	0	Rep1	0.97329	0	0.4337	1.09335	0.74974	0.784468	0.948632	1.03985	0.981505	1.14765	0.843717
MIA PaCa2	0	Rep1	0.77318	0	0.422823	0.928418	1.01694	0.798896	1.45689	0.815021	0.923946	1.11929	0.755412
MIA PaCa2	0	Rep1	0.918592	0	0.386795	1.12227	0.740063	1.04389	0.916503	0.985355	1.03771	0.772775	0.963164
MIA PaCa2	0	Rep1	1.05951	0	0.530909	1.13027	0.573114	0.835028	0.764323	0.957633	0.909501	1.02342	0.605072
MIA PaCa2	0	Rep1	1.54776	2.46653	0.571695	1.0892	0.706608	1.50756	0.781265	0.472794	1.01095	0.758705	1.33453
MIA PaCa2	0	Rep1	1.43879	0	0.383396	1.16536	0.607099	1.87054	0.677669	0.730986	0.997339	1.07136	1.2735
MIA PaCa2	0	Rep1	1.60023	0	0.40175	0.991722	0.955476	1.8008	1.11245	0.971479	0.913126	1.08834	1.74926
MIA PaCa2	0	Rep1	1.20573	0	0.730085	1.13145	0.604309	1.01378	0.682407	1.03148	0.93405	1.30181	0.638753
MIA PaCa2	0	Rep1	1.41887	0	0.442538	1.01347	1.08764	0.803399	1.03157	0.723277	0.945377	0.872843	1.24221
MIA PaCa2	0	Rep1	0.786557	0	0.670263	1.09817	0.858999	0.841852	0.646193	0.866018	1.0071	1.14406	0.397449
MIA PaCa2	0	Rep1	0.601384	0	0.445937	1.06988	0.509952	0.868261	0.890374	1.02409	1.07539	0.515822	1.19285
MIA PaCa2	0	Rep1	2.21672	0	0.537027	0.885801	1.19802	1.40278	1.8565	0.735788	1.00543	1.26384	0.962502
MIA PaCa2	0	Rep1	0.868323	0	0.514593	1.04632	1.01211	0.998731	0.837839	1.06749	1.0067	1.18225	0.947756
MIA PaCa2	0	Rep1	1.15797	0	0.420785	0.994991	0.717468	0.689298	1.15856	0.86864	0.981091	1.20872	0.585161
MIA PaCa2	0	Rep1	0.599533	0	0.504398	1.08337	0.584289	0.851162	0.885504	0.928567	1.02494	1.27757	0.564806
MIA PaCa2	0	Rep1	1.19162	1.01855	0.358925	1.0431	0.633164	0.833125	1.10936	0.819215	0.969599	1.38164	0.933002
MIA PaCa2	0	Rep1	1.02001	0	0.572375	1.05444	1.06265	0.658792	0.96496	0.928883	0.998362	1.01714	0.79209
MIA PaCa2	0	Rep1	0.896247	0	0.496239	1.08579	0.975121	1.38905	0.963093	1.14223	0.998254	0.950137	1.01591
MIA PaCa2	0	Rep1	1.13987	0	0.417386	1.04118	0.793761	2.60885	0.79127	0.729547	0.917714	1.05176	1.10267
MIA PaCa2	0	Rep1	1.01568	4.58148	0.592769	1.15114	1.06593	1.69985	0.723066	0.619448	0.999754	0.970409	1.01733
MIA PaCa2	0	Rep1	0.967944	16.8158	0.677061	1.09342	1.41444	1.16847	0.682575	0.838267	0.987102	0.879872	1.46979
MIA PaCa2	0	Rep1	1.2548	1.96995	0.477206	1.01147	1.88754	1.34598	0.983792	1.03939	0.961265	1.10996	0.852914
MIA PaCa2	0	Rep1	0.637497	1.10703	0.707651	1.04676	1.49099	1.36772	0.863722	0.889714	0.837459	0.868437	1.01471
MIA PaCa2	0	Rep1	1.31888	0.948493	0.440498	0.99845	1.19765	1.11408	0.763187	0.741519	1.0239	0.980765	1.44024
MIA PaCa2	0	Rep1	1.76591	4.0154	0.390194	1.2127	0.737155	1.09085	0.584254	0.965214	1.05364	1.07957	1.51354
MIA PaCa2	0	Rep1	0.710115	0	0.367082	0.988166	1.07894	1.0764	1.04403	1.3896	0.936074	1.13501	1.74924
MIA PaCa2	0	Rep1	0.750113	0	0.498279	1.02624	1.2383	1.58137	0.781007	1.16481	0.871439	1.09976	0.904965
MIA PaCa2	0	Rep1	0.932727	0	0.468369	0.988493	1.36915	0.955307	0.667234	1.02611	1.03287	0.997853	1.74384
MIA PaCa2	0	Rep1	0.424417	1.0109	0.361643	1.10909	1.26093	0.926222	0.81739	0.915765	1.03593	0.999123	0.760506
MIA PaCa2	0	Rep1	1.57384	0	0.518673	1.1705	0.447399	1.57573	0.787787	0.722092	0.994048	0.678821	1.63579
MIA PaCa2	0	Rep1	0.560032	1.84942	0.677741	0.97251	1.13804	0.725499	0.900178	0.890877	0.928761	1.32369	1.19745
MIA PaCa2	0	Rep1	0.719436	0.660413	0.474486	1.15348	1.59841	1.37573	0.815418	1.05595	0.934055	0.802305	1.24767
MIA PaCa2	0	Rep1	1.85932	0	0.210732	1.09487	0.391899	1.28186	0.869195	0.848936	0.953241	1.43838	0.696329
MIA PaCa2	0	Rep1	1.80218	0	0.300464	1.05212	0.623202	1.39265	0.829078	1.20767	0.907785	1.2089	1.68426
MIA PaCa2	0	Rep1	0.842898	3.68283	0.510515	0.903447	1.61705	0.886659	1.2127	1.0547	0.94121	0.872786	0.740012
MIA PaCa2	0	Rep1	0.819548	0	0.562178	1.16908	1.43187	0.988977	0.862662	1.14093	0.980084	0.87683	1.12138
MIA PaCa2	0	Rep1	1.64146	0	0.560819	1.07682	0.47119	2.09686	0.949169	0.739625	0.859076	0.91036	1.42378
MIA PaCa2	0	Rep1	0.652518	2.5897	0.544505	1.13375	0.866196	0.877108	0.834771	0.948224	1.00092	1.13618	0.634128
MIA PaCa2	0	Rep1	0.952056	1.83429	0.74028	0.988219	1.56778	1.03342	0.890745	0.891588	0.987102	1.01491	1.134
MIA PaCa2	0	Rep1	1.24062	0.338449	1.23448	0.879272	0.865659	1.22269	1.21645	0.800396	0.91669	0.733305	1.18413
MIA PaCa2	0	Rep1	1.15758	4.98564	0.638994	1.07872	1.27524	1.17542	0.838339	0.753108	1.06052	1.16732	1.1668
MIA PaCa2	0	Rep1	0.532442	0	0.9279	1.0275	0.851575	0.731777	0.877668	1.10713	1.0582	1.19769	0.402004
MIA PaCa2	0	Rep1	0.711078	4.48928	0.511875	1.09292	1.45002	1.21906	0.688146	1.30138	1.07227	0.894939	1.80293
MIA PaCa2	0	Rep1	0.383082	0	0.479246	1.10314	0.815088	0.503858	0.807322	1.12311	0.772656	0.884599	0.516411
MIA PaCa2	0	Rep1	0.197343	0	4.8713	0.715927	0.21188	0.106647	1.05799	0.972794	1.00985	0.917266	1.40699
MIA PaCa2	0	Rep1	0.111997	0	2.54849	0.700148	0.320041	0.178425	1.67463	1.00106	0.925247	0.863375	0.378195
MIA PaCa2	0	Rep1	0.318443	2.07771	4.42401	0.813384	0.465418	0.269173	1.15979	0.797653	0.899389	0.909219	0.515257
MIA PaCa2	0	Rep1	0.513083	0	0.405149	0.972209	0.718519	0.885841	1.27144	1.10616	0.832202	0.625609	0.471732
MIA PaCa2	0	Rep1	0.241208	0	1.18214	0.719099	0.241182	0.093243	1.75089	1.05291	1.0046	0.83671	0.197505
MIA PaCa2	0	Rep1	1.13343	2.12968	0.980924	0.863684	0.873626	0.733274	0.927614	0.932953	0.941231	0.761223	0.693554
MIA PaCa2	0	Rep1	0.0892784	0	0.203255	1.09168	0.291648	0.104748	0.643298	1.09523	1.02146	0.83277	0.0425985
MIA PaCa2	0	Rep1	0.792633	0	0.533628	1	0.784342	0.865032	0.98486	0.763639	0.966392	0.881533	0.900108
MIA PaCa2	0	Rep1	0.617847	4.90308	1.32081	0.945437	0.504538	0.29182	0.825451	0.720665	0.992934	0.865375	1.16834
MIA PaCa2	0	Rep1	0.732375	3.25733	1.39491	0.922516	0.912295	0.928226	1.09251	0.78522	0.812408	0.696015	0.740079
MIA PaCa2	0	Rep1	1.04099	0	0.626078	1.17525	1.03666	1.36807	0.695849	0.627306	0.994714	0.921421	0.68515
MIA PaCa2	0	Rep1	1.18923	3.19468	0.670263	1.10963	0.943788	0.606391	0.783673	0.649519	0.915986	0.732227	0.784856
MIA PaCa2	0	Rep1	1.10185	3.10331	0.622679	1.15842	0.838117	0.618664	0.778844	0.686427	0.953861	0.729518	1.18451
MIA PaCa2	0	Rep1	0.730949	0	0.407868	1.20893	0.849031	0.758858	0.786243	1.14574	0.95258	0.806486	0.87371
MIA PaCa2	0	Rep1	1.16053	0	0.751838	1.01579	1.25822	0.848226	1.19077	1.27321	0.907206	0.892267	1.01263
MIA PaCa2	0	Rep1	1.12896	0	0.299783	1.01907	0.899816	0.547377	0.922138	1.02589	0.970124	1.2695	0.721871
MIA PaCa2	0	Rep1	1.08777	5.38395	0.611123	1.08454	1.14215	0.550863	0.954039	0.843114	1.05668	0.831748	0.598641
MIA PaCa2	0	Rep1	1.47512	0	0.49692	1.20076	0.96266	1.29799	0.708289	0.777186	1.02178	1.29893	0.669725
MIA PaCa2	0	Rep1	1.12574	2.42297	0.517313	0.910835	0.880956	0.797038	0.893357	0.861743	0.905193	0.778545	0.821529
MIA PaCa2	0	Rep1	1.08472	10.7018	0.927221	1.08045	1.07671	0.960222	0.851264	0.625923	0.88018	0.768378	1.00155
MIA PaCa2	0	Rep1	1.10171	1.42274	0.550622	0.976368	0.768109	0.868749	0.953952	0.916282	1.03088	1.11907	1.08056
MIA PaCa2	0	Rep1	0.842392	0	0.46293	1.09413	0.86593	0.517394	0.791337	0.973182	1.04985	0.88329	0.759125
MIA PaCa2	0	Rep1	1.20916	0	0.645111	1.16963	0.93984	0.691016	0.791949	0.9822	0.85514	0.940504	0.653752
MIA PaCa2	0	Rep1	1.25484	0	0.52547	0.969488	1.84912	0.949389	0.851602	0.866885	0.98612	0.850166	1.51915
MIA PaCa2	0	Rep1	1.76056	3.96603	0.460892	1.02623	1.13806	0.970027	0.767937	0.87981	1.02133	1.26465	1.05906
MIA PaCa2	0	Rep1	0.879082	5.59192	0.429621	1.00766	1.23159	0.633819	0.903853	0.780713	1.02424	1.1388	0.661955
MIA PaCa2	0	Rep1	0.872804	0	0.573054	1.18231	0.781861	0.552954	0.797115	0.745089	0.950923	0.772537	0.906627
MIA PaCa2	0	Rep1	1.45202	0	0.415346	1.17095	0.600417	1.02327	0.772087	0.88612	1.06014	1.20947	1.36554
MIA PaCa2	0	Rep1	1.2927	0	0.867399	0.979007	1.30572	1.08847	1.22055	1.02069	0.996146	1.03539	1.22271
MIA PaCa2	0	Rep1	0.750443	0	0.726686	0.995363	0.748804	0.723773	1.05476	0.849731	1.03327	0.908904	0.682539
MIA PaCa2	0	Rep1	0.815399	0	0.545864	1.00284	1.04037	0.760355	0.918904	1.10591	1.04213	0.942466	0.790643
MIA PaCa2	0	Rep1	0.754309	0	0.571016	1.07637	0.790952	0.632693	1.10791	0.938982	0.846847	0.939739	0.579135
MIA PaCa2	0	Rep1	0.67826	0	0.474486	0.984889	0.701711	0.53624	1.15751	1.04958	0.967203	1.18104	0.771072
MIA PaCa2	0	Rep1	2.1648	4.72789	0.441857	1.26718	0.755465	1.22622	0.588008	0.773279	1.04863	1.27797	1.35416
MIA PaCa2	0	Rep1	1.38961	0	0.549942	1.16793	0.795609	0.638338	0.772713	1.05896	1.0017	1.12564	0.688386
MIA PaCa2	0	Rep1	1.14237	0	0.594807	1.10278	0.896577	0.733261	1.09201	0.905611	0.989432	0.946964	0.665741
MIA PaCa2	0	Rep1	0.765915	0	0.385436	1.08909	0.868814	0.543248	1.14419	0.97371	1.04792	1.2866	0.917917
MIA PaCa2	0	Rep1	1.22875	0	0.578493	1.14785	0.61284	1.14433	0.772572	0.86801	1.02135	1.17457	0.811231
MIA PaCa2	0	Rep1	0.896393	0	0.540426	0.9968	0.626197	0.543444	0.920329	1.06917	1.04207	1.22718	0.591974
MIA PaCa2	0	Rep1	1.53172	3.32759	0.533628	1.08168	1.12372	0.941195	1.19345	0.844239	0.97166	1.18929	0.867876
MIA PaCa2	0	Rep1	0.885708	0	0.526151	0.949755	0.831441	1.43132	1.25807	1.00376	0.997678	0.979146	0.869046
MIA PaCa2	0	Rep1	0.91531	0	0.865361	0.994087	1.00847	0.789225	0.879552	1.00039	0.938556	0.893301	1.15526
MIA PaCa2	0	Rep1	1.58289	0	0.254918	1.0837	1.47143	0.4316	0.787072	1.08811	0.993749	0.670283	1.00195
MIA PaCa2	0	Rep1	0.803188	0.684056	1.22157	0.998877	0.502267	0.505247	1.05007	0.863417	0.961226	1.27744	0.358128
MIA PaCa2	0	Rep1	0.697382	0	0.52955	0.924002	0.613413	0.755776	0.785443	1.30703	0.979551	1.06041	0.716537
MIA PaCa2	0	Rep1	0.895949	0	0.384756	1.07308	0.804025	1.45528	0.864966	0.937229	0.868697	1.30317	1.20788
MIA PaCa2	0	Rep1	1.27263	7.58357	0.736883	1.08261	0.982353	1.43354	0.656608	0.812982	1.048	1.0203	1.08847
MIA PaCa2	0	Rep1	0.953494	2.81078	1.0591	0.780695	1.14446	1.25446	2.07003	0.853419	0.969993	0.939895	0.798717
MIA PaCa2	0	Rep1	0.929562	0	0.691337	0.99351	0.841439	0.924776	1.07323	0.902567	0.941109	1.04124	0.756323
MIA PaCa2	0	Rep1	1.13557	0	0.621999	1.0186	0.596653	1.87127	1.09502	0.836031	1.02424	1.48601	1.08665
MIA PaCa2	0	Rep1	0.352776	0	0.295704	0.938679	0.805976	0.925353	1.37704	1.02137	1.0199	1.303	0.846149
MIA PaCa2	0	Rep1	1.11541	0.512675	0.71309	0.820538	0.736277	0.812462	1.99879	0.991922	1.04405	1.05621	0.288493
MIA PaCa2	0	Rep1	1.45257	0	0.450695	1.05018	0.811629	1.0126	0.840958	1.05028	0.986558	1.21304	0.716211
MIA PaCa2	0	Rep1	0.939268	0	0.695415	1.04611	0.914772	0.553772	0.8696	0.921123	0.932699	0.990161	0.586651
MIA PaCa2	0	Rep1	1.10082	0	0.410588	0.796486	0.895417	1.15486	1.75973	0.984799	1.00804	1.21495	1.00271
MIA PaCa2	0	Rep1	1.51235	0	0.764073	1.08487	0.760663	1.28663	1.04484	0.553572	1.01677	1.34097	1.44214
MIA PaCa2	0	Rep1	1.10105	0.504341	0.62132	1.07213	0.706404	1.07158	0.931125	0.904758	1.00817	1.20585	0.655731
MIA PaCa2	0	Rep1	1.1846	0	0.448655	0.860759	0.915533	1.54081	1.16574	0.974256	1.01143	1.13238	1.65551
MIA PaCa2	0	Rep1	0.835893	0.535387	0.585291	1.06856	0.754303	1.45485	0.975443	0.738798	0.948585	1.13115	1.17825
MIA PaCa2	0	Rep1	0.87162	4.3939	1.20049	1.05494	0.751425	0.632908	0.795511	0.803572	0.957709	0.841439	1.13759
MIA PaCa2	0	Rep1	0.954862	0	0.518673	1.07591	1.20889	1.21924	0.819299	0.989346	0.911087	0.903991	0.687456
MIA PaCa2	0	Rep1	0.366976	0	0.337851	1.06436	1.00938	0.709726	0.684782	1.15348	1.03262	0.485629	0.846834
MIA PaCa2	0	Rep1	0.701285	0	0.312699	1.07807	1.34829	1.74685	0.793932	1.03091	1.01202	1.04398	1.38047
MIA PaCa2	0	Rep1	1.02423	6.04037	0.769511	1.06893	0.726594	1.01827	0.854346	0.75501	0.991604	1.14195	1.50994
MIA PaCa2	0	Rep1	2.20304	4.81117	0.347367	1.1664	0.609179	2.16941	0.799062	0.811788	1.06014	1.4074	1.41456
MIA PaCa2	0	Rep1	1.70927	0	0.425543	1.10976	0.597835	1.66924	1.00721	0.861914	1.10196	1.3436	1.27296
MIA PaCa2	0	Rep1	0.676452	4.99288	0.83681	0.966234	0.947964	0.717831	0.973207	1.20774	0.929148	0.6426	0.899731
MIA PaCa2	0	Rep1	0.369514	0.530554	2.55938	0.811458	0.355093	0.194626	1.07901	0.873531	0.843458	0.84563	0.557696
MIA PaCa2	0	Rep1	1.24192	0	0.662786	0.959515	1.05188	0.624228	0.895404	0.940983	0.910129	0.944828	1.25228
MIA PaCa2	0	Rep1	0.626478	1.25573	0.914984	0.940095	0.827048	0.706561	0.803516	1.11733	1.0229	0.642649	0.411629
MIA PaCa2	0	Rep1	1.17825	0	0.636954	0.963963	1.00015	0.693147	1.37767	1.10309	1.01164	1.13761	0.741074
MIA PaCa2	0	Rep1	1.08467	0	0.856523	1.07755	1.0646	0.890185	0.837304	0.658484	0.975691	1.30308	0.621375
MIA PaCa2	0	Rep1	0.42873	0	0.578493	0.883135	0.659464	0.912941	1.67277	1.15074	1.03161	1.14316	0.781854
MIA PaCa2	0	Rep1	1.5866	5.14112	0.904107	1.08319	1.03567	1.33718	0.71843	0.475179	0.909425	0.736288	0.936142
MIA PaCa2	0	Rep1	0.398348	0	2.74019	0.845259	0.587631	0.384457	0.992385	1.02967	0.767734	0.845355	0.34567
MIA PaCa2	0	Rep1	0.686422	0	0.353486	1.1608	1.12854	0.39383	0.690367	0.930616	0.943672	1.17874	1.01077
MIA PaCa2	0	Rep1	0.673615	2.69048	1.22292	0.738668	0.578022	0.475462	1.7524	0.680062	0.845147	0.915406	0.9734
MIA PaCa2	0	Rep1	1.57667	0	0.718527	1.03616	0.654749	1.55112	1.2746	0.849717	0.848238	1.30403	0.560131
MIA PaCa2	0	Rep1	1.58072	0	0.724646	1.13799	0.832479	1.60682	0.989683	0.89858	1.05038	0.987683	0.977064
MIA PaCa2	0	Rep1	0.964139	0	0.43098	1.06152	0.743482	1.54945	0.91277	1.02394	0.976839	0.96105	1.10061
MIA PaCa2	0	Rep1	1.04185	0	1.28343	0.85621	0.921514	1.00514	1.88474	0.906195	0.934106	1.081	0.483829
MIA PaCa2	0	Rep1	0.576618	0	0.411267	1.0319	0.890577	1.30281	0.868819	1.05391	1.03295	0.879283	0.994119
MIA PaCa2	0	Rep1	1.17536	0	0.480605	1.07818	0.824489	1.27687	0.986216	0.967186	0.993305	0.955958	1.59796
MIA PaCa2	0	Rep1	0.534236	0	0.27939	0.96086	1.19567	0.903675	0.970284	1.07983	1.0237	0.805525	0.786033
MIA PaCa2	0	Rep1	0.995303	0	0.286188	1.07056	1.19766	1.25204	0.836955	1.1826	1.00626	0.903559	0.647144
MIA PaCa2	0	Rep1	0.386155	0	0.271233	1.0033	1.00292	0.651498	1.08985	1.13819	0.909697	1.00828	0.701558
MIA PaCa2	0	Rep1	0.98083	4.85066	0.667544	1.10697	1.13066	0.629523	0.814726	0.856566	0.9611	0.969457	0.572126
MIA PaCa2	0	Rep1	0.220514	0	0.284148	1.06588	1.12152	0.70183	0.890565	1.06576	1.00782	1.18864	0.982967
MIA PaCa2	0	Rep1	0.698911	0	0.539066	0.974159	1.14129	0.70372	1.12547	1.10585	0.873235	0.914414	0.957969
MIA PaCa2	0	Rep1	0.749485	0	0.333773	0.895463	1.32312	0.816971	1.00131	1.25388	0.993563	1.053	0.934388
MIA PaCa2	0	Rep1	0.86037	0	0.615881	1.07794	0.959102	1.01469	0.908234	0.950374	1.03766	0.971886	0.412781
MIA PaCa2	0	Rep1	1.39716	0.497269	0.630156	1.01623	1.00748	0.899045	0.996325	1.08916	0.960134	1.13978	0.92409
MIA PaCa2	0	Rep1	0.821922	0	0.221609	1.06745	1.04984	0.663789	0.826535	1.14495	1.05922	0.676323	1.08052
MIA PaCa2	0	Rep1	0.443464	0	0.24812	1.10379	1.32558	1.04313	0.7916	1.08031	0.925506	0.778857	0.922643
MIA PaCa2	0	Rep1	1.18301	0	0.537707	0.913734	1.2185	0.640729	1.29603	0.854283	1.02215	1.13427	0.688542
MIA PaCa2	0	Rep1	0.928898	0	0.423503	1.03709	0.764757	1.04964	1.02271	1.1344	1.00543	1.37159	1.42056
MIA PaCa2	0	Rep1	0.900719	0	0.307941	1.05183	1.42426	0.822197	0.725672	0.944883	0.959214	0.69323	1.09455
MIA PaCa2	0	Rep1	1.65745	0	0.394272	1.16792	0.867891	0.925492	0.74617	1.10941	1.00072	0.489606	0.690179
MIA PaCa2	0	Rep1	0.804247	2.48482	0.777669	0.956669	0.890142	0.661538	1.22659	0.87164	0.966636	1.09388	0.590319
MIA PaCa2	0	Rep1	1.05024	0	0.366402	1.0863	1.26576	2.21097	1.03981	1.09021	0.994405	1.03485	0.780838
MIA PaCa2	0	Rep1	0.980215	1.46805	0.533628	1.08168	0.864823	1.63673	0.879773	0.587625	1.01512	1.15096	1.02102
MIA PaCa2	0	Rep1	0.921825	0	0.740961	1.18906	1.11329	1.11374	0.701674	1.01832	1.01966	1.09154	0.843379
MIA PaCa2	0	Rep1	0.760608	0	0.447975	0.89848	1.20846	0.938716	1.22915	0.955599	1.03989	0.833571	0.831649
MIA PaCa2	0	Rep1	0.994542	0	0.416706	0.965142	0.965066	0.768124	1.02384	0.71036	1.0649	1.19473	1.31017
MIA PaCa2	0	Rep1	0.772916	0	0.375239	1.02862	1.22789	1.42304	0.938721	0.964242	1.00448	0.798252	1.0569
MIA PaCa2	0	Rep1	0.80829	0	0.450015	0.881346	0.942276	0.646513	0.971849	0.998228	0.980142	1.14195	1.23417
MIA PaCa2	0	Rep1	0.23993	0	0.509835	0.80073	1.27316	1.33244	0.995446	1.21078	1.00919	0.881272	0.558531
MIA PaCa2	0	Rep1	0.545399	0	0.40311	1.15031	1.29104	0.745958	0.810903	1.1146	1.04735	0.96986	1.51376
MIA PaCa2	0	Rep1	0.52829	0	0.261716	0.981223	1.04832	0.968752	0.951825	1.07985	1.04958	0.977307	1.39369
MIA PaCa2	0	Rep1	1.55968	0	0.590729	1.00808	1.02266	1.4076	0.859131	0.813852	1.05288	1.18919	1.37695
MIA PaCa2	0	Rep1	0.893196	3.26023	0.368441	0.990412	1.47036	1.03607	1.0134	1.01851	1.01507	0.855277	1.25595
MIA PaCa2	0	Rep1	0.937498	0	0.456132	1.01981	1.21025	0.773109	0.866146	0.961194	1.02523	0.957151	0.987939
MIA PaCa2	0	Rep1	0.696827	0	0.520712	0.93383	0.687834	0.756372	1.2907	1.10076	0.927206	1.51075	0.497185
MIA PaCa2	0	Rep1	1.19664	0	0.166547	1.19541	2.36306	1.3241	0.752939	1.16152	0.958599	0.818558	1.59185
MIA PaCa2	0	Rep1	1.50299	0	0.312699	1.16665	1.4997	0.386132	0.679483	1.04533	0.955622	1.34723	1.879
MIA PaCa2	0	Rep1	0.627777	0	0.267153	1.09637	1.61084	1.57388	0.693008	1.02483	1.03498	0.926301	1.33707
MIA PaCa2	0	Rep1	1.07502	3.28676	0.508476	1.03883	1.15212	1.48407	0.90057	1.06154	1.0211	1.09426	0.933464
MIA PaCa2	0	Rep1	0.958401	0	0.426902	1.05545	0.936128	1.26151	0.885186	1.05258	1.04373	1.40711	1.41401
MIA PaCa2	0	Rep1	1.94044	3.15607	0.579173	1.18969	0.799723	0.958567	0.700629	0.831375	1.02177	1.32917	1.16254
MIA PaCa2	0	Rep1	1.00595	0	0.6186	1.01526	1.12833	1.11694	1.00082	0.899526	1.02726	0.8892	1.08727
MIA PaCa2	0	Rep1	0.986645	0	0.664146	1.08104	1.16404	1.40803	0.8766	0.809401	0.894657	0.783257	1.20636
MIA PaCa2	0	Rep1	0.412592	3.22034	1.13523	0.83043	0.325211	0.173741	1.18453	0.932406	0.877176	0.912464	0.960347
MIA PaCa2	0	Rep1	0.615451	2.03969	0.998597	0.787844	0.600306	0.305794	1.17391	0.725431	0.932796	0.774085	1.07362
MIA PaCa2	0	Rep1	1.62049	0	0.583251	1.14022	0.550936	0.855037	0.814101	0.652756	1.08112	1.00526	1.07956
MIA PaCa2	0	Rep1	0.654655	2.38558	0.853805	0.946148	0.842776	0.398553	0.740955	0.824971	0.944863	0.93644	0.394216
MIA PaCa2	0	Rep1	1.05069	2.47108	0.697455	0.989411	0.865652	0.941652	0.701807	0.798637	1.08686	1.09442	1.03488
MIA PaCa2	0	Rep1	1.68299	0	0.573054	1.12841	0.779483	1.70882	0.769577	0.677636	0.995172	0.911491	1.07
MIA PaCa2	0	Rep1	0.841864	0	0.354165	0.9539	0.945886	0.611852	0.958771	1.12193	0.886913	0.696856	0.788889
MIA PaCa2	0	Rep1	1.02669	0	0.390873	1.06872	0.921834	0.717964	0.894683	1.02651	0.937316	0.579848	1.14343
MIA PaCa2	0	Rep1	0.735968	1.05844	1.43094	0.87138	0.340577	0.432197	1.18788	0.736927	0.956315	0.927869	0.9576
MIA PaCa2	0	Rep1	0.584563	2.53494	0.803501	0.935083	0.423283	0.251464	1.03985	0.826957	1.03442	0.923227	1.06099
MIA PaCa2	0	Rep1	1.10574	0	0.980243	0.972028	0.833583	1.0513	1.04066	0.701835	0.956352	0.921757	1.21974
MIA PaCa2	0	Rep1	1.74432	0	0.526151	1.22582	0.799595	1.82433	0.75249	0.64949	0.869902	0.809028	0.726171
MIA PaCa2	0	Rep1	1.01749	0	0.709011	1.12352	0.781006	1.35871	0.744024	0.760367	0.760974	0.940659	0.469946
MIA PaCa2	0	Rep1	1.72696	0	0.443897	1.08053	0.948043	0.767331	0.768135	0.857331	0.973807	1.0854	0.804466
MIA PaCa2	0	Rep1	1.50938	0	0.437778	1.19134	0.589291	1.96083	0.682316	0.621658	1.04871	1.28714	1.3061
MIA PaCa2	0	Rep1	0.355063	1.63997	1.87891	0.756882	0.417338	0.759943	1.0068	0.838514	0.967469	0.881977	1.13779
MIA PaCa2	0	Rep1	0.325952	1.03223	2.125	0.87051	0.236507	0.16721	0.869922	0.883914	1.00202	0.788731	0.938744
MIA PaCa2	0	Rep1	1.78111	0	0.574415	1.19815	0.752227	1.80417	0.731943	0.845525	0.96757	1.32832	0.736424
MIA PaCa2	0	Rep1	1.09754	0	0.596168	0.992974	0.625893	0.863288	1.15711	0.880379	0.91708	0.754386	0.893743
MIA PaCa2	0	Rep1	1.24627	0	0.752517	0.962862	0.80511	1.60491	1.32787	0.829469	0.98438	1.15046	0.779638
MIA PaCa2	0	Rep1	0.839604	0	0.540426	1.08987	0.942002	1.72439	0.690899	0.930321	0.998254	1.0536	0.585418
MIA PaCa2	0	Rep1	1.90567	0	0.549263	1.15319	0.735565	1.37933	0.841391	0.56719	1.0149	0.937268	1.32694
MIA PaCa2	0	Rep1	2.45241	0	0.407189	1.26223	0.559337	1.199	0.721118	0.766162	1.04985	0.870434	0.964411
MIA PaCa2	0	Rep1	1.21014	0	0.413987	1.0229	0.815199	1.14007	0.730378	0.904011	0.946618	0.821104	0.933402
MIA PaCa2	0	Rep1	1.38422	4.51025	1.01899	1.05096	0.843025	1.90357	0.998323	0.617265	0.867156	0.928611	1.47468
MIA PaCa2	0	Rep1	2.49558	6.48548	0.628118	0.757838	0.868655	3.50233	2.14717	0.729045	1.00956	1.40535	0.899662
MIA PaCa2	0	Rep1	1.36301	3.50156	0.507116	1.12689	0.571701	1.5242	0.609584	0.660851	1.00305	0.825608	1.6163
MIA PaCa2	0	Rep1	1.10263	4.33565	0.602286	0.922802	0.543654	1.26758	0.910021	0.981434	0.992814	1.34373	1.71416
MIA PaCa2	0	Rep1	1.55032	0	0.694736	1.05582	0.674594	1.23341	1.08096	0.968007	1.02259	1.03574	1.25876
MIA PaCa2	0	Rep1	0.362961	0	0.609764	0.957347	0.462912	0.200531	1.08742	0.896143	0.822181	0.852221	0.523387
MIA PaCa2	0	Rep1	0.709838	0	0.602286	1.11096	1.06365	1.20677	0.640991	0.94925	0.924673	0.712746	0.594648
MIA PaCa2	0	Rep1	0.804504	0	0.740961	1.007	0.829715	1.23902	0.675813	1.11483	0.914272	0.829793	0.832611
MIA PaCa2	0	Rep1	0.9449	0	0.741641	1.11926	0.778137	0.749948	0.903551	0.950252	0.932089	0.783464	0.779699
MIA PaCa2	0	Rep1	0.854473	1.80936	0.750477	0.867829	0.669919	0.548071	0.938721	0.914721	1.00977	1.05611	0.814379
MIA PaCa2	0	Rep1	0.846042	0	0.799422	1.00719	0.74058	0.674165	1.10861	0.874061	0.777958	0.884337	0.490872
MIA PaCa2	0	Rep1	0.503886	0.9353	0.390873	1.00044	0.975713	0.833436	0.980475	1.05863	0.986577	0.948552	0.852022
MIA PaCa2	0	Rep1	0.767817	0	0.439139	0.939326	0.746693	0.692963	1.15506	1.11274	0.958641	1.00119	0.743648
MIA PaCa2	0	Rep1	0.612912	0	0.893231	0.996276	0.779556	0.576882	1.11617	1.10971	0.863487	0.894254	0.436947
MIA PaCa2	0	Rep1	0.81517	0	0.643073	1.01836	0.630788	0.518929	1.10997	1.05049	0.882131	1.06417	0.513649
MIA PaCa2	0	Rep1	1.09062	0	0.598206	1.14425	0.933466	0.647851	0.90916	1.07291	1.02215	1.00838	1.10395
MIA PaCa2	0	Rep1	1.21251	0	0.494201	1.1235	1.31165	0.738646	0.707624	0.77687	0.981786	0.786907	1.10791
MIA PaCa2	0	Rep1	1.00917	0	0.733484	0.870038	0.6093	0.337597	0.941261	0.698026	0.950022	0.753609	1.00294
MIA PaCa2	0	Rep1	0.816534	0.507534	0.823214	0.848144	0.764722	0.567331	1.28229	0.929215	0.96905	0.683346	0.242299
MIA PaCa2	0	Rep1	0.407971	0	0.486044	0.976917	0.277353	0.2227	1.05809	1.14421	1.00477	0.648553	0.905834
MIA PaCa2	0	Rep1	0.82863	0	0.579173	1.12263	1.23063	1.15388	0.87384	0.88341	0.977894	0.818144	0.733013
MIA PaCa2	0	Rep1	0.842906	0.677894	0.462251	0.980613	0.676797	0.896109	1.08512	0.987442	1.05138	0.87304	1.20983
MIA PaCa2	0	Rep1	0.936967	0	0.611123	0.804046	1.33491	0.821969	1.41884	0.92899	1.06014	0.840943	1.15673
MIA PaCa2	0	Rep1	0.673545	0	0.981603	1.05344	0.830105	0.710315	0.699606	1.06726	0.890786	0.91111	0.64174
MIA PaCa2	0	Rep1	0.521605	0	0.723966	1.00236	0.610609	0.526948	1.11361	0.987963	1.06979	1.06279	0.646803
MIA PaCa2	0	Rep1	1.6939	0	0.43098	0.985247	1.00947	0.820809	1.15404	0.99393	0.950796	0.949752	1.07273
MIA PaCa2	0	Rep1	0.966768	0	0.853805	0.96181	0.949375	0.701151	1.07265	1.08834	0.87054	1.07315	0.590503
MIA PaCa2	0	Rep1	0.825235	0	0.645791	1.12051	1.05062	0.764604	0.874896	1.09458	0.991348	0.903458	0.463919
MIA PaCa2	0	Rep1	0.860611	3.36846	1.53494	1.0882	0.83747	0.688397	0.735265	0.691774	0.773309	0.973563	0.563553
MIA PaCa2	0	Rep1	0.8747	0	0.777669	0.973454	0.922644	0.884465	1.39435	1.0757	0.917232	1.08068	0.756552
MIA PaCa2	0	Rep1	0.546398	1.48793	1.43909	0.696489	0.56125	0.441648	0.895459	0.790855	0.934768	0.887226	0.716852
MIA PaCa2	0	Rep1	0.676697	0	0.346688	1.05048	0.7915	0.498116	0.949375	1.35594	0.985588	1.01761	0.377269
MIA PaCa2	0	Rep1	0.737131	0	0.737562	0.951298	1.07129	0.712123	1.0182	0.981997	1.0149	0.841201	0.687313
MIA PaCa2	0	Rep1	0.952149	0	0.462251	1.15058	1.13085	1.30896	0.619979	0.910924	0.965208	0.745779	1.42799
MIA PaCa2	0	Rep1	0.864269	0	0.40379	1.04729	1.80796	1.39829	0.90724	1.13366	0.882468	1.24508	1.21834
MIA PaCa2	0	Rep1	0.686513	0	0.92586	0.858228	0.608557	0.425057	1.30418	0.847143	0.963904	0.990235	1.22823
MIA PaCa2	0	Rep1	1.15051	3.98444	0.511194	0.985095	0.829837	1.22315	1.32576	0.840558	0.991869	1.52565	1.05834
MIA PaCa2	0	Rep1	1.05064	0	0.36912	0.941336	0.927073	0.791273	1.25201	1.26619	0.904104	1.06716	0.515779
MIA PaCa2	0	Rep1	0.403414	0	0.49692	1.20076	0.680144	0.548632	0.784846	1.09898	0.972708	1.04189	0.350832
MIA PaCa2	0	Rep1	0.66931	0	0.288906	1.09425	1.04669	0.663567	0.639853	1.20612	1.02275	0.796438	0.742017
MIA PaCa2	0	Rep1	1.45395	0	0.486044	0.999385	1.08674	0.861107	0.990835	0.83445	0.944909	1.01678	1.11049
MIA PaCa2	0	Rep1	0.541876	0	0.286188	0.960912	1.03168	0.871539	1.14712	0.975555	0.97587	1.14978	0.968482
MIA PaCa2	0	Rep1	0.862606	0	0.779708	0.992304	0.883635	1.13529	0.969306	0.763411	1.02606	1.21332	0.828625
MIA PaCa2	0	Rep1	0.355356	2.77878	2.02982	0.768582	0.336257	0.198097	1.16352	0.863636	0.970337	0.930783	1.33437
MIA PaCa2	0	Rep1	1.06119	0	0.721926	1.04907	1.13193	0.758808	0.853279	0.977469	0.711821	0.838615	0.852399
MIA PaCa2	0	Rep1	1.06976	0	0.21549	0.976058	1.37177	0.624429	1.01739	0.978596	0.919702	0.785527	0.825231
MIA PaCa2	0	Rep1	0.610721	0	0.43302	1.07828	1.23369	0.955383	0.752939	1.03939	1.02107	0.8443	0.933241
MIA PaCa2	0	Rep1	1.1462	0	0.300464	1.10279	0.849989	0.710683	0.818761	1.1664	0.988803	1.06975	0.98359
MIA PaCa2	0	Rep1	0.594606	0	0.270552	1.12381	1.24234	0.536134	0.655139	1.15795	1.02565	1.25476	0.907766
MIA PaCa2	0	Rep1	1.17101	0	0.196457	1.11241	0.727401	0.941576	0.695679	1.20269	1.0378	1.33608	1.00539
MIA PaCa2	0	Rep1	1.42851	0	0.479925	0.980463	0.786804	0.775481	0.962951	0.88599	0.893404	0.775935	1.40252
MIA PaCa2	0	Rep1	1.19345	0.541587	0.675023	0.84796	0.90672	0.645619	1.88525	1.01195	1.02374	0.990399	0.383436
MIA PaCa2	0	Rep1	0.731842	0	0.522752	0.936066	1.07406	0.933414	0.96007	1.03767	1.02298	0.947657	0.599337
MIA PaCa2	0	Rep1	0.93772	0	0.560819	0.858115	0.813224	0.924084	0.802447	0.925241	0.999661	1.27195	0.768618
MIA PaCa2	0	Rep1	0.625806	0	0.65327	0.997966	0.666811	0.848397	0.974015	0.903651	1.05583	1.20738	0.581887
MIA PaCa2	0	Rep1	1.13712	5.51476	0.965967	0.971078	1.08586	0.831419	0.77861	0.875123	1.02329	0.848385	0.836136
MIA PaCa2	0	Rep1	0.476557	0	0.40175	1.16431	0.844969	0.944322	0.65723	1.18967	1.07176	0.902012	0.674054
MIA PaCa2	0	Rep1	1.31518	0	1.03802	0.946878	0.591798	1.53862	0.842652	0.757189	0.925092	1.26194	0.846965
MIA PaCa2	0	Rep1	0.802744	0	0.716489	0.879601	1.08752	0.810515	1.209	1.00417	1.02788	0.935194	0.541952
MIA PaCa2	0	Rep1	0.973259	0	0.294345	1.03892	0.928683	0.657441	1.13064	1.26776	1.03143	1.17556	0.705502
MIA PaCa2	0	Rep1	0.807539	0	0.414666	0.885849	0.894443	0.79289	1.01188	1.00483	0.91477	1.05786	1.33911
MIA PaCa2	0	Rep1	0.95978	0	0.574415	1.06832	0.844069	0.850274	0.914929	1.03693	0.89788	1.14149	0.864813
MIA PaCa2	0	Rep1	0.889209	0	0.325614	1.02563	1.11344	0.912973	0.972739	1.36298	0.965088	0.887497	0.978672
MIA PaCa2	0	Rep1	0.773586	0	0.381357	1.14496	0.932377	0.89576	0.704199	1.16919	1.04066	1.6589	1.23808
MIA PaCa2	0	Rep1	1.18781	0	0.683859	0.76174	1.15739	0.919207	1.25144	1.32725	1.02135	1.25766	0.891581
MIA PaCa2	0	Rep1	0.545907	0	0.562178	1.03187	0.962974	0.268967	1.01705	1.26789	0.973613	1.25686	0.433546
MIA PaCa2	0	Rep1	0.755621	0	0.216851	1.0933	0.44198	0.496399	0.730316	0.951099	0.907785	2.06016	0.662959
MIA PaCa2	0	Rep1	1.23711	5.30254	0.443217	1.10764	0.697936	0.810357	0.842429	0.988861	0.93801	0.964437	1.11169
MIA PaCa2	0	Rep1	1.24439	4.48632	0.651909	1.10309	1.12707	1.23368	0.769858	0.797895	0.952524	1.01088	1.49303
MIA PaCa2	0	Rep1	1.03834	0	0.600926	0.775175	0.965415	1.32967	1.69755	0.76538	0.80685	1.18254	0.736939
MIA PaCa2	0	Rep1	0.860458	0	0.410588	1.03087	0.657033	1.31479	1.02262	0.83929	1.00985	1.37498	0.806498
MIA PaCa2	0	Rep1	0.788934	0	0.475847	0.975382	0.895288	1.45241	1.12873	0.956947	0.85023	1.25787	0.872032
MIA PaCa2	0	Rep1	1.63066	0	0.314737	1.04998	1.39322	1.30097	0.8058	0.840208	0.937316	0.980476	1.49365
MIA PaCa2	0	Rep1	0.893534	3.53875	0.560819	0.947161	0.897392	1.29769	0.979317	1.07931	0.885608	1.08642	1.56719
MIA PaCa2	0	Rep1	0.889535	0	0.723287	1.13674	0.657635	1.20441	0.729729	1.07149	0.979418	1.02062	0.825377
MIA PaCa2	0	Rep1	1.62294	0	0.402431	1.19937	0.552394	2.62882	0.56719	1.15879	1.00125	0.882939	1.16839
MIA PaCa2	0	Rep1	1.57037	0	0.600926	0.958344	0.637839	1.99004	0.89004	0.840738	1.01969	1.10635	0.833289
MIA PaCa2	0	Rep1	1.42657	0	0.442538	1.07855	1.25605	2.09778	0.685168	0.529633	0.997115	1.17182	1.799
MIA PaCa2	0	Rep1	1.07611	0	0.522071	1.06763	1.2425	1.09639	0.782658	0.929291	1.0239	0.727032	1.74693
MIA PaCa2	0	Rep1	2.0822	2.97879	0.420785	1.18002	1.72574	2.03166	0.627501	0.61509	0.99889	1.78126	1.37283
MIA PaCa2	0	Rep1	1.01115	3.4509	0.575094	0.991927	1.29802	1.52793	0.808008	1.08553	1.01233	1.17471	1.06881
MIA PaCa2	0	Rep1	1.23221	0	0.813698	0.950134	0.858409	1.81821	1.29002	0.730147	1.05974	1.20575	0.670543
MIA PaCa2	0	Rep1	0.96947	0	0.425543	1.22189	1.1571	1.13348	0.623133	1.0583	1.05536	1.10641	1.43804
MIA PaCa2	0	Rep1	1.39991	0	0.473807	0.871735	0.822516	1.68746	0.966465	0.856778	1.04578	1.31755	1.42143
MIA PaCa2	0	Rep1	1.02469	0	0.389514	1.11131	1.47739	1.27851	0.70175	1.09378	1.04366	0.864769	1.22962
MIA PaCa2	0	Rep1	1.85135	0	0.414666	1.27577	0.568876	2.67278	0.563366	0.525037	1.02215	1.24304	1.05094
MIA PaCa2	0	Rep1	0.73648	0	0.424863	1.07992	0.851535	2.60617	0.799231	0.845382	0.977894	0.682787	2.22577
MIA PaCa2	0	Rep1	1.31686	0	0.46293	1.13673	0.903807	1.39113	1.04518	0.811029	1.09151	1.08925	1.41057
MIA PaCa2	0	Rep1	0.992703	4.64483	0.416025	1.20569	0.885548	1.59645	0.642806	1.06121	1.04422	1.18885	1.51743
MIA PaCa2	0	Rep1	0.520758	0	1.37112	0.936239	0.841914	0.778335	0.957324	1.21132	0.903968	0.820332	0.457861
MIA PaCa2	0	Rep1	0.659497	0	0.445937	1.11169	1.31094	1.04483	0.643294	1.2531	1.01039	0.895018	0.86469
MIA PaCa2	0	Rep1	0.939787	0	0.380678	1.23161	0.419633	0.898716	0.658821	1.06415	1.00522	1.05615	0.999406
MIA PaCa2	0	Rep1	1.28862	6.66544	0.595488	1.09145	0.974604	1.44115	0.717872	0.595966	1.00467	0.976562	2.04365
MIA PaCa2	0	Rep1	1.2874	0	0.503717	0.965625	0.756009	1.13278	1.39466	0.807057	0.958732	1.08013	0.856285
MIA PaCa2	0	Rep1	0.90567	2.66877	0.645791	0.669284	0.904961	1.39514	1.81001	0.772023	1.05668	1.25341	1.13542
MIA PaCa2	0	Rep1	0.831603	0	0.469049	1.08906	0.876802	0.955224	0.788825	0.880134	0.970529	0.777721	0.939914
MIA PaCa2	0	Rep1	1.21934	0	0.43098	1.16427	0.765292	0.908876	0.638155	0.964956	1.02397	1.13365	1.03607
MIA PaCa2	0	Rep1	1.25392	0	0.692016	0.86105	0.87102	1.39995	1.72412	0.896334	0.908482	1.27035	0.96368
MIA PaCa2	0	Rep1	1.18336	0	0.484004	1.12355	0.873392	0.782737	0.850038	0.870202	0.984783	1.07309	0.718416
MIA PaCa2	0	Rep1	1.25466	0	0.473807	0.930127	1.43862	1.27609	0.948028	1.03437	1.00679	0.869901	1.13463
MIA PaCa2	0	Rep1	0.711809	0	0.399032	1.14336	1.0352	1.21774	0.743628	0.966878	0.97349	0.896348	0.832311
MIA PaCa2	0	Rep1	1.03913	3.28238	0.509156	1.03967	0.780859	1.27378	0.65806	0.701077	0.91166	1.14117	1.19435
MIA PaCa2	0	Rep1	1.00262	4.60968	0.407868	1.09646	0.78832	1.0187	0.91544	0.843202	1.05359	1.35068	1.39174
MIA PaCa2	0	Rep1	0.793163	0	0.400391	1.12979	1.38609	1.46398	0.71647	0.899898	1.03609	0.77819	0.937905
MIA PaCa2	0	Rep1	1.00069	0	0.551303	0.918467	1.04614	0.786903	1.38674	1.08058	0.973613	1.04012	1.35741
MIA PaCa2	0	Rep1	0.456041	0	0.746399	0.958146	0.981094	1.03794	1.33574	1.08029	0.999255	0.780376	0.42552
MIA PaCa2	0	Rep1	1.23712	0	0.805539	1.04865	0.944817	0.759353	0.84657	1.02062	0.963114	1.1488	1.20598
MIA PaCa2	0	Rep1	0.741639	0	0.473127	0.919132	0.903948	0.780992	0.903528	1.11709	0.984982	0.96914	0.647206
MIA PaCa2	0	Rep1	2.13184	1.73203	0.422144	1.2702	0.452461	1.12937	0.556056	0.538034	1.06515	0.763115	1.25422
MIA PaCa2	0	Rep1	0.516045	0	0.71241	1.10409	0.937704	0.8727	0.690634	0.858476	0.985882	1.02248	0.37243
MIA PaCa2	0	Rep1	1.0689	0	0.296383	1.04334	0.902337	0.975874	0.928909	0.769942	1.04366	1.15173	1.0721
MIA PaCa2	0	Rep1	1.20344	0	0.396992	1.1727	1.34478	1.27604	0.829078	0.873408	0.967431	1.2618	1.39683
MIA PaCa2	0	Rep1	0.857898	0	0.731444	0.913966	0.858594	0.908844	0.667655	0.874501	0.996759	1.01181	0.555892
MIA PaCa2	0	Rep1	1.16236	0	0.429621	1.07318	1.27842	0.621443	0.758895	0.919387	0.950153	0.418865	2.044
MIA PaCa2	0	Rep1	1.66187	0	0.24948	1.05122	1.17484	0.860751	0.818913	0.845509	1.05799	0.831012	1.1873
MIA PaCa2	0	Rep1	1.10228	0	0.506436	1.08598	0.846589	1.54772	0.928678	0.814176	0.870425	0.961286	1.05904
MIA PaCa2	0	Rep1	0.757122	0.932056	1.1767	0.98396	0.462579	1.14555	0.921517	0.814583	0.850433	1.03169	0.891827
MIA PaCa2	0	Rep1	0.518809	0	0.396312	1.02206	0.499913	0.36049	1.07226	0.984313	0.848815	0.714755	1.10205
MIA PaCa2	0	Rep1	0.618951	0	0.333773	0.93166	1.10082	0.723577	1.03424	0.944246	0.774765	0.7984	1.15854
MIA PaCa2	0	Rep1	0.334776	0.724523	1.80209	0.928987	0.293583	0.151981	0.723685	0.895333	0.903588	0.896057	1.49797
MIA PaCa2	0	Rep1	0.903401	3.056	1.70897	1.00886	0.603857	0.589785	0.782249	0.504892	0.944009	0.764453	1.10879
MIA PaCa2	0	Rep1	1.61852	0	0.413307	1.21842	0.662981	1.12982	0.721353	0.59973	1.02755	0.870567	0.961525
MIA PaCa2	0	Rep1	1.01884	1.23253	0.635595	1.07532	0.798303	0.720996	0.869423	0.899532	0.89093	0.881444	0.352922
MIA PaCa2	0	Rep1	0.741205	0	0.517313	1.026	0.809375	0.674203	0.984871	0.909013	0.953527	0.902415	0.454954
MIA PaCa2	0	Rep1	1.74924	2.52796	0.475167	1.02075	0.979461	1.13271	0.894313	0.750376	0.859752	0.984891	1.03713
MIA PaCa2	0	Rep1	0.636635	0	0.706292	1.08754	0.451047	0.765175	0.670684	0.893625	0.862786	0.804054	0.551479
MIA PaCa2	0	Rep1	0.900205	0	0.379317	1.15795	1.46285	0.980447	0.770389	1.10595	1.00937	0.935182	0.927192
MIA PaCa2	0	Rep1	0.932247	0	0.335811	0.9608	0.951181	1.22915	1.09509	1.24157	1.01777	1.09032	0.765655
MIA PaCa2	0	Rep1	0.92655	0	0.747758	1.10271	0.757389	0.932151	0.885229	0.801795	0.987381	0.855899	0.660345
MIA PaCa2	0	Rep1	1.15592	0	0.613842	0.96122	1.25947	0.855005	1.03658	1.07855	0.939033	0.851175	0.516577
MIA PaCa2	0	Rep1	0.958235	0	0.329694	0.912273	1.08636	0.816521	1.36242	0.98977	1.02069	1.13842	1.06441
MIA PaCa2	0	Rep1	0.96994	0	0.80622	1.00341	0.84755	1.19885	1.09926	0.971473	0.991155	1.12956	0.708527
MIA PaCa2	0	Rep1	1.08109	0	0.795344	1.01308	0.795041	0.90729	0.922969	0.819129	1.06128	0.6951	0.645275
MIA PaCa2	0	Rep1	0.993516	0	0.386115	1.20519	0.976559	0.770376	0.703548	0.839409	0.87949	0.548913	0.924075
MIA PaCa2	0	Rep1	1.19126	4.11445	0.698135	0.945357	1.04338	1.23189	1.02363	0.677095	0.951322	0.881525	0.887994
MIA PaCa2	0	Rep1	0.811097	0	0.473127	1.1976	0.699809	0.619037	0.724847	1.04796	1.06143	1.02149	1.03078
MIA PaCa2	0	Rep1	0.617406	0	0.691337	0.984194	0.689412	0.85609	0.994567	1.15972	0.928155	0.982534	0.548415
MIA PaCa2	0	Rep1	1.75003	0	0.485363	1.21571	0.622413	1.25227	0.69264	0.800545	0.965888	1.21184	1.04675
MIA PaCa2	0	Rep1	1.05439	0	0.40583	1.05049	1.24982	0.837121	0.825606	1.07224	1.08133	0.822084	0.527334
MIA PaCa2	0	Rep1	0.660469	0	0.421464	0.971884	0.869297	1.1727	0.680646	0.937664	0.917648	0.676479	1.28789
MIA PaCa2	0	Rep1	1.21208	0	0.547904	0.994355	1.22313	1.44765	0.969487	0.732722	1.08811	1.00039	0.511202
MIA PaCa2	0	Rep1	0.88098	0	0.665505	0.885805	0.908539	0.619715	1.37953	1.14132	0.780598	1.20724	0.430385
MIA PaCa2	0	Rep1	2.07602	7.29651	0.486723	1.23402	0.687733	1.68969	0.542491	0.674459	1.02858	0.671553	1.91237
MIA PaCa2	0	Rep1	1.15258	0	0.859242	1.0154	0.675597	1.28667	1.19803	1.01657	0.936806	1.09919	1.1542
MIA PaCa2	0	Rep1	1.59689	0	0.696095	1.14647	0.78367	1.14648	1.05457	0.835281	1.0211	1.05768	0.485074
MIA PaCa2	0	Rep1	1.59828	0	0.385436	1.1199	0.614342	1.5599	0.720874	0.687981	0.986261	0.955944	1.3432
MIA PaCa2	0	Rep1	1.72566	0	0.500999	1.22234	0.605085	1.11054	0.718272	0.71687	1.03091	1.06719	1.06861
MIA PaCa2	0	Rep1	1.77823	2.27485	0.505077	1.22816	0.502897	1.0133	0.627667	0.83061	1.09769	1.44479	1.29675
MIA PaCa2	0	Rep1	1.60605	0	0.507116	1.23106	0.874127	1.06892	0.762952	0.925334	1.01233	1.43087	1.46921
MIA PaCa2	0	Rep1	0.539652	1.69438	1.07881	0.908342	0.381192	0.33602	0.861468	0.914235	1.00288	0.983028	1.93325
MIA PaCa2	0	Rep1	0.572126	0	0.513914	1.17879	0.968279	1.57644	0.712832	0.780392	1.06505	0.867427	1.37013
MIA PaCa2	0	Rep1	1.99132	0	0.329694	1.26514	0.796001	1.32637	0.56497	0.87341	1.05655	1.10416	1.17187
MIA PaCa2	0	Rep1	1.80644	0	0.517992	1.11389	0.803044	1.74676	1.11523	0.737155	1.03201	1.12759	0.741943
MIA PaCa2	0	Rep1	0.667697	0	0.666864	0.911129	0.810758	1.05686	1.14136	1.12298	0.854423	1.16491	1.92297
MIA PaCa2	0	Rep1	1.06048	0	0.358244	0.99989	1.12782	2.20834	0.93291	1.24554	1.03703	1.16683	1.11114
MIA PaCa2	0	Rep1	1.03285	4.61194	0.464291	1.09605	1.50736	1.39809	0.878847	0.846302	0.994109	0.89819	1.59577
MIA PaCa2	0	Rep1	0.469788	0	0.460211	1.11829	0.955441	1.15163	0.838875	0.927648	0.884763	1.0443	2.61513
MIA PaCa2	0	Rep1	1.26777	0.52112	0.701534	1.15171	1.15343	1.57945	0.685275	0.821029	1.05675	1.37528	1.44848
MIA PaCa2	0	Rep1	1.99337	0	0.510515	1.05342	0.764997	2.32445	1.02117	0.800577	0.982147	1.14046	0.48267
MIA PaCa2	0	Rep1	1.57613	0	0.474486	1.16851	0.646906	2.39045	0.582612	0.739335	1.04636	1.42854	1.38021
MIA PaCa2	0	Rep1	0.499358	0	0.86604	0.895345	0.485993	0.417962	0.813785	0.864387	0.901581	0.972988	1.41929
MIA PaCa2	0	Rep1	0.763168	0	0.915665	0.911825	0.744622	0.511422	1.37164	0.951733	1.00657	0.95856	0.332393
MIA PaCa2	0	Rep1	1.02906	0	0.938777	0.947257	0.973752	0.946282	1.13165	0.985067	0.988332	0.910695	0.612661
MIA PaCa2	0	Rep1	1.48827	0	0.452054	1.15045	0.586379	0.323415	0.653912	0.783618	1.05665	0.226463	1.55258
MIA PaCa2	0	Rep1	1.64194	0	0.568296	1.07332	0.914399	1.49702	0.978332	0.778392	1.0293	1.32939	1.78466
MIA PaCa2	0	Rep1	0.88643	3.30838	0.71037	1.08045	1.4972	1.26839	0.86478	1.15792	0.846377	0.697567	1.69413
MIA PaCa2	0	Rep1	1.66067	0	0.425543	1.17152	0.857224	1.71366	0.65227	1.03618	1.09769	1.61271	1.5817
MIA PaCa2	0	Rep1	0.905569	0	0.583931	1.16765	1.07294	1.37878	0.799641	0.950954	0.970078	0.862591	0.834328
MIA PaCa2	0	Rep1	0.854553	4.3223	1.34121	0.924033	0.771899	0.712167	1.02637	0.605035	0.832973	0.90477	1.21072
MIA PaCa2	0	Rep1	1.23824	0.7423	0.844287	0.81101	0.715371	1.28684	1.07105	0.639358	0.847295	0.992962	0.626275
MIA PaCa2	0	Rep1	1.19037	1.38333	0.981603	0.902292	0.944962	1.01572	1.00707	0.568412	0.869265	1.02282	0.918071
MIA PaCa2	0	Rep1	1.5623	2.90298	0.773591	1.07228	0.988557	1.35536	0.904118	0.645309	1.02713	1.04482	0.871439
MIA PaCa2	0	Rep1	0.983182	0	0.963929	0.9333	0.731781	1.88776	0.886669	0.874819	0.972597	1.174	1.01452
MIA PaCa2	0	Rep1	1.10896	0	0.615881	1.07794	0.829877	1.5227	0.992423	0.714356	1.07332	1.20329	1.17683
MIA PaCa2	0	Rep1	1.12586	0	0.360963	1.10783	0.94115	1.66913	0.753352	1.3882	0.986402	0.89102	0.75097
MIA PaCa2	0	Rep1	0.757857	0	1.2508	0.81281	0.699973	0.682283	1.53583	0.987786	0.727557	0.868274	0.72639
MIA PaCa2	0	Rep1	1.16272	0	0.493521	1.06934	1.08307	1.18368	0.771979	1.12136	0.863853	1.08297	0.985206
MIA PaCa2	0	Rep1	0.206567	0	0.630156	0.668769	0.153088	0.0656629	1.10633	1.09565	1.03626	0.942433	0.0332714
MIA PaCa2	0	Rep1	0.996382	0	0.450695	1.07672	0.559694	1.7696	0.865968	1.21929	0.962238	1.43813	1.23172
MIA PaCa2	0	Rep1	1.22942	2.68206	1.20729	1.13309	0.845413	1.51916	0.779828	0.835771	0.997171	1.03325	1.28656
MIA PaCa2	0	Rep1	1.56534	0	0.324255	0.994041	0.682617	1.40531	0.903816	0.94135	1.01912	1.09312	0.758681
MIA PaCa2	0	Rep1	1.58055	2.80395	0.46565	1.08433	0.66412	0.926279	0.692915	0.836529	0.949244	1.02216	0.938767
MIA PaCa2	0	Rep1	1.22809	0.861746	0.787866	0.924055	0.678303	0.80019	1.34377	0.737876	0.964973	0.869618	0.89225
MIA PaCa2	0	Rep1	1.16919	0	0.628797	1.20534	0.656015	1.08202	0.79233	0.705856	1.02713	1.38123	1.14943
MIA PaCa2	0	Rep1	1.34066	0	0.398351	1.20966	0.661299	2.23899	0.73853	0.890085	1.01523	0.884424	0.846242
MIA PaCa2	0	Rep1	0.371078	0	1.12844	0.65655	0.270464	0.113362	1.35574	0.92051	0.921404	0.853341	0.982005
MIA PaCa2	0	Rep1	0.883283	0	0.734163	1.10165	0.799584	1.47852	1.1396	0.923081	1.07749	1.22029	0.538572
MIA PaCa2	0	Rep1	0.745542	0	0.679781	1.05263	0.451404	0.596373	0.996966	0.968469	0.961796	1.01248	0.78895
MIA PaCa2	0	Rep1	1.25707	0	0.475167	1.09753	0.774777	1.23274	0.826706	0.648746	0.970772	1.19024	1.33762
MIA PaCa2	0	Rep1	0.99936	0	0.367082	1.11909	1.25488	1.66043	0.936551	0.932084	0.990049	1.18987	0.565774
MIA PaCa2	0	Rep1	1.57127	0	0.573735	1.0915	0.496396	1.34064	1.08546	0.845151	1.1164	1.03839	1.19007
MIA PaCa2	0	Rep1	1.2067	0	0.498959	0.960055	1.38776	1.58739	0.968011	1.06595	0.916303	0.758723	1.05435
MIA PaCa2	0	Rep1	1.11104	0	0.558099	0.668535	1.14917	0.997564	1.47437	1.09355	0.969156	1.17212	1.01945
MIA PaCa2	0	Rep1	1.07409	0	0.428262	1.12894	1.33729	2.03619	0.632995	1.06646	0.953648	0.902091	1.30737
MIA PaCa2	0	Rep1	1.05854	0	0.623358	1.09736	0.918317	1.42332	0.967861	0.875337	1.04266	1.0922	1.24955
MIA PaCa2	0	Rep1	1.51447	0	0.425543	1.13991	1.04347	0.903796	0.612537	0.951779	0.969053	0.76049	1.29565
MIA PaCa2	0	Rep1	1.26271	0	0.935378	0.916585	0.924773	0.772919	1.57771	0.993019	0.975965	1.09061	0.450967
MIA PaCa2	0	Rep1	1.04074	0	0.64919	0.947562	0.963775	1.60901	0.981004	0.99649	0.976726	1.06389	1.08817
MIA PaCa2	0	Rep1	1.09003	2.90802	0.55674	1.09666	0.998485	1.0476	0.916136	0.692406	0.955437	1.14655	0.933518
MIA PaCa2	0	Rep1	0.884572	0.719941	0.507797	1.12779	1.00269	0.774764	0.781909	1.03855	1.1009	0.845342	0.795531
MIA PaCa2	0	Rep1	0.843638	0.71579	0.437778	1.04484	1.0866	1.21899	0.845814	1.16693	1.03201	0.76817	0.594501
MIA PaCa2	0	Rep1	1.78655	0	0.454094	1.13848	0.534807	1.56928	1.00284	0.885589	1.07906	1.34738	1.27751
MIA PaCa2	0	Rep1	1.10027	0	0.740961	1.11866	0.808204	0.698525	0.960286	0.957255	0.920993	1.2419	0.923266
MIA PaCa2	0	Rep1	1.74202	0	0.422823	1.1834	1.00975	1.54102	0.683123	0.769757	0.975364	1.28654	0.977387
MIA PaCa2	0	Rep1	1.35854	6.94544	1.09785	0.957876	1.56056	1.26023	0.888372	0.658825	0.89046	1.28545	1.41132
MIA PaCa2	0	Rep1	0.863669	0	0.432341	0.930339	0.573983	0.53797	1.08523	0.892766	0.888118	1.29763	0.84765
MIA PaCa2	0	Rep1	0.287324	0.153218	2.38604	0.720387	0.314054	0.264934	0.918836	0.865871	0.957179	0.879998	1.46638
MIA PaCa2	0	Rep1	1.38911	0	0.763394	1.00654	0.80132	0.890147	1.35288	0.947205	0.909384	0.835197	1.11726
MIA PaCa2	0	Rep1	1.06614	0	1.36228	0.944558	0.694528	0.961148	0.94016	0.764592	0.963767	1.3021	0.844064
MIA PaCa2	0	Rep1	1.15848	0	0.675702	1.10342	0.812701	0.74006	0.822405	0.634146	1.06034	1.11218	1.23581
MIA PaCa2	0	Rep1	0.90433	0.472304	0.663465	1.04796	0.912521	1.1518	0.690191	0.844138	0.996945	1.11562	0.981751
MIA PaCa2	0	Rep1	0.489653	0	0.385436	1.07422	1.07582	0.91036	0.75158	0.946007	1.05309	1.1092	0.66978
MIA PaCa2	0	Rep1	0.0616306	0	2.21064	0.823919	0.176691	0.0694733	1.42284	1.03756	1.07471	0.884157	0.0529098
MIA PaCa2	0	Rep1	0.708004	0	0.333773	1.213	0.651985	1.059	0.814726	0.809791	0.996418	0.557952	1.21416
MIA PaCa2	0	Rep1	0.24784	0	0.637634	0.746507	0.239166	0.125352	1.21091	1.03274	0.995226	0.893061	1.0346
MIA PaCa2	0	Rep1	0.967466	0	0.942176	0.979602	0.759259	0.479693	1.06476	0.461006	0.828847	0.821292	1.36803
MIA PaCa2	0	Rep1	1.20922	5.05447	0.77495	1.09394	0.519686	1.62861	1.01853	0.605102	1.0155	0.659799	1.00726
MIA PaCa2	0	Rep1	1.46074	4.50221	0.719208	1.1809	0.756672	1.54066	0.664516	0.504599	0.976152	0.912277	1.24166
MIA PaCa2	0	Rep1	1.39991	0	0.40311	0.969203	0.837343	1.45181	0.810903	0.980058	1.01474	1.03725	1.11486
MIA PaCa2	0	Rep1	1.66724	0	0.461571	1.14957	0.503248	1.37265	0.633103	0.738744	0.96762	0.98756	0.532706
MIA PaCa2	0	Rep1	1.73085	0	0.216169	1.0511	1.03551	1.67864	0.877311	0.890863	0.981773	1.15192	0.818073
MIA PaCa2	0	Rep1	1.44717	0	0.348728	1.01078	0.81631	1.59825	0.94544	0.819868	1.03231	1.39303	0.71915
MIA PaCa2	0	Rep1	1.14134	0	0.696095	0.926812	0.75537	1.05634	1.17398	1.05803	1.05536	0.973358	0.468783
MIA PaCa2	0	Rep1	1.61469	5.59284	0.887114	0.818023	0.845076	1.19615	2.23439	1.02952	0.852938	0.905723	0.659907
MIA PaCa2	0	Rep1	2.45876	0	0.31134	1.1636	0.570109	1.25035	0.872523	0.705103	1.06848	1.67903	0.874726
MIA PaCa2	0	Rep1	0.76415	0	1.17194	0.981603	0.662617	0.771194	1.04644	0.954241	0.864417	1.09996	0.650159
MIA PaCa2	0	Rep1	1.1785	0	0.528869	0.819419	0.807836	1.03784	1.46047	1.03436	0.909679	1.15198	1.10528
MIA PaCa2	0	Rep1	1.07196	0	0.757955	0.984376	0.861932	0.815881	1.12614	0.814429	0.920651	1.12878	1.12282
MIA PaCa2	0	Rep1	1.17951	0	0.581892	1.11309	0.547239	0.609156	0.84506	0.705259	1.03604	0.890965	0.944608
MIA PaCa2	0	Rep1	1.1789	0	0.225687	1.14199	1.26528	0.552779	0.724195	1.00174	0.94284	0.781005	1.16732
MIA PaCa2	0	Rep1	0.672293	1.04528	0.699494	1.09225	0.593681	0.517583	0.746493	0.825287	1.03435	1.18557	0.583695
MIA PaCa2	0	Rep1	1.09236	0	0.417386	1.05466	0.87324	0.6482	0.762914	1.07309	0.994747	0.964663	1.02149
MIA PaCa2	0	Rep1	0.747126	0.921938	0.33989	1.08403	0.35964	0.559581	0.862241	0.787135	0.93653	0.527159	0.865198
MIA PaCa2	0	Rep1	2.12831	0	0.469049	1.13102	0.616054	3.22728	0.962452	0.914274	1.00956	1.18521	1.08539
MIA PaCa2	0	Rep1	0.923261	3.30444	0.505757	1.139	1.04351	0.72893	0.671397	0.879785	1.05202	0.862418	0.745517
MIA PaCa2	0	Rep1	1.87779	0	0.362324	0.954858	0.776738	0.794634	0.85941	0.800005	0.888328	1.6171	0.994265
MIA PaCa2	0	Rep1	1.73344	0	0.507116	0.881323	1.0269	0.741728	0.998006	0.916238	1.03008	0.990641	1.47091
MIA PaCa2	0	Rep1	1.31059	0.959551	0.816416	0.906076	0.968148	0.644325	1.6654	1.00361	0.939493	1.00368	0.931232
MIA PaCa2	0	Rep1	1.83523	0	0.600926	1.12184	0.636047	2.24717	1.00399	1.02093	0.99913	1.20127	0.538332
MIA PaCa2	0	Rep1	0.877054	0	0.593448	1.1261	0.718163	0.89035	0.722238	0.809628	1.02858	1.00339	0.570011
MIA PaCa2	0	Rep1	1.0882	0	0.641712	1.10449	0.620831	0.891111	0.940178	0.841341	0.948201	1.06488	0.682019
MIA PaCa2	0	Rep1	0.950588	0	0.546543	0.860912	0.664158	0.727693	1.34055	0.95904	0.969965	1.13018	1.05158
MIA PaCa2	0	Rep1	1.44765	1.57596	0.397671	1.17389	0.790809	1.78661	0.638461	0.867582	1.0253	1.41638	1.55147
MIA PaCa2	0	Rep1	0.638264	0	0.33989	1.11679	0.482251	1.26199	0.717153	0.839699	0.937509	1.01502	1.49935
MIA PaCa2	0	Rep1	1.34676	0	0.386795	0.994043	0.888671	1.43002	0.939087	0.956702	0.967631	1.53792	1.26256
MIA PaCa2	0	Rep1	0.617085	0	0.191017	1.18868	1.21758	1.68601	0.767119	0.91102	1.02611	0.682256	0.991494
MIA PaCa2	0	Rep1	0.74589	0	0.46565	0.973675	0.660927	1.02022	1.05118	0.848402	0.999255	0.86553	0.912607
MIA PaCa2	0	Rep1	0.785078	0	0.505757	1.11149	0.790327	0.802664	0.662482	1.08545	0.934486	0.596534	1.12562
MIA PaCa2	0	Rep1	2.05229	0	0.475167	1.08405	0.907099	2.29976	0.988014	0.806266	0.920911	1.0792	1.30386
MIA PaCa2	0	Rep1	0.711442	3.57008	0.365723	1.13295	2.21278	1.68089	0.758961	0.913616	0.891991	0.393658	1.5852
MIA PaCa2	0	Rep1	1.04717	0	0.359604	1.15524	1.19813	1.24013	0.909008	1.18573	1.02523	1.36077	1.08189
MIA PaCa2	0	Rep1	0.946601	0	0.470408	1.02664	1.04943	1.87658	0.858432	1.00489	0.944563	1.38967	0.957053
MIA PaCa2	0	Rep1	0.593687	0	0.601605	1.06301	0.876309	0.54021	0.791606	1.00603	1.01857	0.884741	0.491785
MIA PaCa2	0	Rep1	0.973339	0	0.293666	1.14194	0.992154	0.554977	0.734079	1.03226	0.996129	0.605477	0.822037
MIA PaCa2	0	Rep1	0.848732	0	0.350766	1.07322	1.61566	1.4986	0.880493	0.95058	1.01081	1.29838	1.54772
MIA PaCa2	0	Rep1	1.43922	0	0.240642	1.02798	1.34107	0.965949	0.847814	0.985732	0.936776	1.37541	1.25395
MIA PaCa2	0	Rep1	1.48738	0	0.698814	0.851658	0.671834	0.83133	0.891178	1.01495	0.975468	1.60806	0.837121
MIA PaCa2	0	Rep1	0.583206	0	0.420785	1.1323	1.09423	0.689355	1.02463	1.02122	0.981158	0.759759	0.531671
MIA PaCa2	0	Rep1	1.36133	0	0.316098	1.17424	1.37898	1.37511	0.900396	0.780346	1.05252	0.946047	1.52165
MIA PaCa2	0	Rep1	0.940066	2.94332	0.692016	1.06384	1.25706	0.753582	1.14426	1.0111	0.990174	0.881693	0.510544
MIA PaCa2	0	Rep1	1.63582	0	0.352127	1.23227	0.728804	0.950816	0.666623	0.983919	1.06298	1.23974	1.05281
MIA PaCa2	0	Rep1	0.599372	0	0.660747	0.985506	0.908583	0.499721	1.07857	1.02052	0.94495	0.8213	0.668318
MIA PaCa2	0	Rep1	0.911603	0	0.367761	1.04411	1.08175	0.831933	0.791532	1.07741	1.01718	0.878278	1.20908
MIA PaCa2	0	Rep1	0.433001	0	0.429621	1.0595	0.917959	0.519629	0.781852	1.08671	1.09351	0.894427	1.09913
MIA PaCa2	0	Rep1	0.745962	0	0.219568	1.10174	1.34806	0.675516	0.740523	0.980169	0.856364	0.443037	1.17902
MIA PaCa2	0	Rep1	0.832136	3.20562	0.488762	0.937682	1.067	0.803215	1.05393	1.01746	1.03015	0.856983	1.13101
MIA PaCa2	0	Rep1	0.368749	0	0.982283	0.870594	0.466011	0.250964	1.29497	0.895472	0.801378	0.937936	0.903348
MIA PaCa2	0	Rep1	0.469966	0	0.499638	0.846979	1.36356	1.60089	1.58427	1.08438	0.803655	0.738266	1.1251
MIA PaCa2	0	Rep1	0.933211	3.95894	0.844287	0.996309	0.755665	0.57611	0.868129	0.617212	0.875074	0.747181	0.791044
MIA PaCa2	0	Rep1	0.465679	0	0.370481	1.07829	0.668565	1.1668	0.800935	1.08223	0.950806	1.38301	0.996027
MIA PaCa2	0	Rep1	0.279643	1.20734	1.77355	0.841295	0.382975	0.271553	1.28763	0.799835	0.875883	0.907522	1.39684
MIA PaCa2	0	Rep1	0.0772797	0	2.96792	0.715216	0.212671	0.0785051	1.50101	1.03344	1.0214	0.919211	0.0338761
MIA PaCa2	0	Rep1	0.420341	2.26595	1.70557	0.706481	0.305258	0.173535	1.30145	0.799167	0.837563	0.862635	0.747955
MIA PaCa2	0	Rep1	0.622474	5.00232	0.553341	1.0221	0.647673	0.677127	1.01088	0.755181	0.856746	0.993668	0.883946
MIA PaCa2	0	Rep1	1.32148	7.92522	0.560139	1.16659	0.903589	1.37358	0.702302	0.887756	0.966052	1.0326	1.03219
MIA PaCa2	0	Rep1	0.572313	3.80221	2.19772	0.875595	0.431138	0.328536	1.01679	0.657576	0.858546	0.780222	1.16739
MIA PaCa2	0	Rep1	0.822422	3.06562	0.83477	0.925823	0.696199	0.35171	1.08158	0.817744	0.9525	0.610306	0.675209
MIA PaCa2	0	Rep1	1.57453	0.737842	0.566258	1.16025	0.626311	1.71011	0.721587	0.709336	1.04636	1.1677	1.16183
MIA PaCa2	0	Rep1	1.42633	4.5124	0.891192	0.955191	1.0248	1.19936	1.15002	0.759384	1.02569	1.05053	0.811092
MIA PaCa2	0	Rep1	1.30235	1.64129	0.668225	1.04195	1.02163	0.698189	0.722808	0.561428	0.96462	0.877687	0.986122
MIA PaCa2	0	Rep1	1.12661	5.38011	0.485363	0.894294	1.58107	1.39732	0.789598	0.597421	0.984681	1.17894	1.91656
MIA PaCa2	0	Rep1	1.70871	0	0.795344	1.01308	0.872063	2.01764	1.17914	0.719149	0.892755	1.02969	0.754858
MIA PaCa2	0	Rep1	1.10515	3.73632	0.894591	1.07648	0.594679	1.60392	0.813013	0.778387	0.83729	1.37883	1.01294
MIA PaCa2	0	Rep1	0.755686	0	0.645111	0.943951	1.04856	1.44135	1.16586	1.08946	1.02333	1.18624	1.85488
MIA PaCa2	0	Rep1	1.07538	0	0.700854	1.01121	0.746723	1.45358	1.2806	0.838927	1.06128	1.13924	0.700779
MIA PaCa2	0	Rep1	1.09261	0	0.443897	1.18481	0.758496	1.15919	0.763057	0.968186	1.01857	0.935473	0.900378
MIA PaCa2	0	Rep1	0.210968	0	0.225008	1.05805	0.906091	0.931333	1.03822	1.14197	1.03941	1.00078	0.733286
MIA PaCa2	0	Rep1	0.846141	0.234088	1.11552	0.877345	0.956396	1.33017	0.92204	1.03347	0.839593	1.13764	1.18443
MIA PaCa2	0	Rep1	1.40909	0	0.502358	0.996696	0.902249	1.26408	0.925	0.899485	1.00143	1.1698	1.2724
[truncated: 128,326 more rows]

## Sheet: Fig2 C arc strengths
From	To	Strength	TNF_concentration	Cell_line	Abs	Log2	Abs_rounded	Category
Cytoplasm Actin Mean	Cytoplasm Tubulin Mean	-6306.44	All	All PDAC	6306.44	12.6226	6306	None
Cytoplasm Tubulin Mean	Nuc RELA Mean	-3727.86	All	All PDAC	3727.86	11.8641	3728	RELA dependent on Feature
Actin Texture (Bright)	Membrane/Cytoplasm Actin	-2242.24	All	All PDAC	2242.24	11.1307	2242	None
Actin Texture (Bright)	Tubulin Texture (Ridge)	-7036.94	All	All PDAC	7036.94	12.7807	7037	None
Cytoplasm Actin Mean	Tubulin Texture (Ridge)	-5270.29	All	All PDAC	5270.29	12.3637	5270	None
Nuc RELA Mean	Actin Texture (Bright)	-1500.36	All	All PDAC	1500.36	10.5511	1500	Feature dependent on RELA
Membrane/Cytoplasm Actin	Actin Filament/Cell Area	-2192.54	All	All PDAC	2192.54	11.0984	2193	None
Cytoplasm Actin Mean	Actin Filament/Cell Area	-2785.04	All	All PDAC	2785.04	11.4435	2785	None
Cell Area	Cell Roundness	-2118.3	All	All PDAC	2118.3	11.0487	2118	None
Actin Texture (Bright)	Cell Roundness	-2850.64	All	All PDAC	2850.64	11.4771	2851	None
Elongatedness	Cell Roundness	-24242.8	All	All PDAC	24242.8	14.5653	24243	None
Cell Area	Tubulin Texture (Ridge)	-1046.09	All	All PDAC	1046.09	10.0308	1046	None
Cell Area	Actin Filament/Cell Area	-1185.5	All	All PDAC	1185.5	10.2113	1185	None
Cytoplasm Actin Mean	Nuc RELA Mean	-926.668	All	All PDAC	926.668	9.85591	927	RELA dependent on Feature
Cell Area	Cytoplasm Actin Mean	-1026.5	All	All PDAC	1026.5	10.0035	1027	None
Nucleus Roundness	Membrane/Cytoplasm Actin	-630.684	All	All PDAC	630.684	9.30077	631	None
Cytoplasm Tubulin Mean	Actin Texture (Bright)	-626.394	All	All PDAC	626.394	9.29093	626	None
Actin Texture (Bright)	Actin Filament/Cell Area	-634.957	All	All PDAC	634.957	9.31052	635	None
Nuc RELA Mean	Membrane/Cytoplasm Actin	-549.216	All	All PDAC	549.216	9.10123	549	Feature dependent on RELA
Tubulin Texture (Ridge)	Membrane/Cytoplasm Actin	-843.723	All	All PDAC	843.723	9.72063	844	None
Cell Area	Membrane/Cytoplasm Actin	-636.115	All	All PDAC	636.115	9.31314	636	None
Cytoplasm Actin Mean	Cell Roundness	-356.386	All	All PDAC	356.386	8.4773	356	None
Elongatedness	Tubulin Texture (Ridge)	-351.622	All	All PDAC	351.622	8.45788	352	None
Cell Area	Elongatedness	-367.475	All	All PDAC	367.475	8.5215	367	None
Cell Area	Nuc RELA Mean	-322.477	All	All PDAC	322.477	8.33305	322	RELA dependent on Feature
Cell Roundness	Nucleus Roundness	-367.848	All	All PDAC	367.848	8.52297	368	None
Cell Area	Cytoplasm Tubulin Mean	-240.603	All	All PDAC	240.603	7.91051	241	None
Nuc RELA Mean	Nucleus Roundness	-141.368	All	All PDAC	141.368	7.14331	141	Feature dependent on RELA
Tubulin Texture (Ridge)	Nucleus Roundness	-103.986	All	All PDAC	103.986	6.70025	104	None
Cytoplasm Tubulin Mean	Elongatedness	-35.0009	All	All PDAC	35.0009	5.12932	35	None
Cytoplasm Tubulin Mean	Actin Filament/Cell Area	-32.5944	All	All PDAC	32.5944	5.02655	33	None

## Sheet: Fig2 D arc strengths
Feature	Strength	Concentration	Line	Abs	Log2	Direction	Dependency
Elongatedness	0	0	All PDAC	0	0	0	0
Cytoplasm Tubulin Mean	-1438.41	0	All PDAC	1438.41	10.4903	-1	-10.4903
Actin Texture	-139.394	0.01	All PDAC	139.394	7.12302	-1	-7.12302
Cell Area	-170.37	0.01	All PDAC	170.37	7.41252	-1	-7.41252
Membrane Cytoplasm Actin	-948.234	0.01	All PDAC	948.234	9.8891	-1	-9.8891
Cell Roundness	-100.597	0.01	All PDAC	100.597	6.65244	-1	-6.65244
Nucleus Roundness	-7.67075	0.01	All PDAC	7.67075	2.93937	-1	-2.93937
Cell Area	-708.185	0.1	All PDAC	708.185	9.46798	-1	-9.46798
Membrane Cytoplasm Actin	-89.4399	0.1	All PDAC	89.4399	6.48285	-1	-6.48285
Actin Texture	-478.607	10	All PDAC	478.607	8.9027	-1	-8.9027
Actin Filament Cell Area	-19.8769	10	All PDAC	19.8769	4.31302	-1	-4.31302
Cell Roundness	-10.8859	10	All PDAC	10.8859	3.4444	-1	-3.4444
Actin Texture	-1488.81	All	All PDAC	1488.81	10.5399	-1	-10.5399
Cell Area	-155.079	All	All PDAC	155.079	7.27686	-1	-7.27686
Membrane Cytoplasm Actin	-574.397	All	All PDAC	574.397	9.16591	-1	-9.16591
Nucleus Roundness	-86.3812	All	All PDAC	86.3812	6.43265	-1	-6.43265
Actin Filament Cell Area	-22.4914	All	All PDAC	22.4914	4.4913	-1	-4.4913
Membrane Cytoplasm Actin	-107.458	0	MIA PaCa2	107.458	6.74763	-1	-6.74763
Actin Filament Cell Area	-91.1791	0	MIA PaCa2	91.1791	6.51063	-1	-6.51063
Nucleus Roundness	-36.4497	0.01	MIA PaCa2	36.4497	5.18784	-1	-5.18784
Nucleus Roundness	-157.096	0.1	MIA PaCa2	157.096	7.2955	-1	-7.2955
Tubulin Texture	-77.1594	0.1	MIA PaCa2	77.1594	6.26977	-1	-6.26977
Cytoplasm Tubulin Mean	-720.195	0.1	MIA PaCa2	720.195	9.49224	-1	-9.49224
Actin Texture	-41.7863	0.1	MIA PaCa2	41.7863	5.38496	-1	-5.38496
Actin Filament Cell Area	-15.6523	0.1	MIA PaCa2	15.6523	3.9683	-1	-3.9683
Cytoplasm Actin Mean	-279.537	0.1	MIA PaCa2	279.537	8.1269	-1	-8.1269
Tubulin Texture	-240.922	10	MIA PaCa2	240.922	7.91242	-1	-7.91242
Cytoplasm Tubulin Mean	-1895.65	10	MIA PaCa2	1895.65	10.8885	-1	-10.8885
Nucleus Roundness	-29.8311	10	MIA PaCa2	29.8311	4.89874	-1	-4.89874
Nucleus Roundness	-128.017	All	MIA PaCa2	128.017	7.00019	-1	-7.00019
Elongatedness	-9.20253	All	MIA PaCa2	9.20253	3.20203	-1	-3.20203
Elongatedness	-8.16924	0	PANC1	8.16924	3.0302	-1	-3.0302
Cytoplasm Actin Mean	-200.011	0.01	PANC1	200.011	7.64393	-1	-7.64393
Tubulin Texture	-59.476	0.01	PANC1	59.476	5.89424	-1	-5.89424
Cytoplasm Actin Mean	-209.172	0.1	PANC1	209.172	7.70855	-1	-7.70855
Cell Area	-69.1472	0.1	PANC1	69.1472	6.1116	-1	-6.1116
Tubulin Texture	-14.9641	0.1	PANC1	14.9641	3.90343	-1	-3.90343
Cytoplasm Tubulin Mean	-391.389	10	PANC1	391.389	8.61246	-1	-8.61246
Actin Texture	-29.9418	10	PANC1	29.9418	4.90409	-1	-4.90409
Tubulin Texture	-109.785	All	PANC1	109.785	6.77853	-1	-6.77853
Actin Filament Cell Area	-30.676	0	Capan1	30.676	4.93904	-1	-4.93904
Membrane Cytoplasm Actin	-67.3605	0	Capan1	67.3605	6.07383	-1	-6.07383
Membrane Cytoplasm Actin	-14.5211	0.01	Capan1	14.5211	3.86008	-1	-3.86008
Actin Filament Cell Area	-20.3602	0.01	Capan1	20.3602	4.34768	-1	-4.34768
Cytoplasm Tubulin Mean	-554.768	0.1	Capan1	554.768	9.11574	-1	-9.11574
Cell Area	-106.194	10	Capan1	106.194	6.73056	-1	-6.73056
Membrane Cytoplasm Actin	-8.15177	10	Capan1	8.15177	3.02711	-1	-3.02711
Membrane Cytoplasm Actin	-53.1254	All	Capan1	53.1254	5.73133	-1	-5.73133
Actin Filament Cell Area	-18.325	All	Capan1	18.325	4.19574	-1	-4.19574
Cytoplasm Tubulin Mean	-182.414	0.1	SW1990	182.414	7.51107	-1	-7.51107
Membrane Cytoplasm Actin	-11.1565	10	SW1990	11.1565	3.47981	-1	-3.47981
Cytoplasm Tubulin Mean	-143.061	10	SW1990	143.061	7.16048	-1	-7.16048
Cytoplasm Actin Mean	-80.7456	0	PANC05.04	80.7456	6.33531	-1	-6.33531
Cell Area	-63.3269	0	PANC05.04	63.3269	5.98475	-1	-5.98475
Cell Area	-68.0931	0.01	PANC05.04	68.0931	6.08944	-1	-6.08944
Cytoplasm Actin Mean	-84.9743	0.01	PANC05.04	84.9743	6.40895	-1	-6.40895
Cell Area	-18.5236	0.1	PANC05.04	18.5236	4.2113	-1	-4.2113
Cytoplasm Tubulin Mean	-57.8009	10	PANC05.04	57.8009	5.85302	-1	-5.85302
Cytoplasm Actin Mean	-273.168	All	PANC05.04	273.168	8.09364	-1	-8.09364
Cell Area	-53.1866	All	PANC05.04	53.1866	5.73299	-1	-5.73299
Cytoplasm Actin Mean	-1429.28	0	All PDAC	1429.28	10.4811	1	10.4811
Actin Filament Cell Area	-3.46735	0	All PDAC	3.46735	1.79383	1	1.79383
Nucleus Roundness	-108.451	0	All PDAC	108.451	6.7609	1	6.7609
Actin Texture	-195.277	0	All PDAC	195.277	7.60937	1	7.60937
Membrane Cytoplasm Actin	-439.326	0	All PDAC	439.326	8.77915	1	8.77915
Cytoplasm Tubulin Mean	-1596.72	0.01	All PDAC	1596.72	10.6409	1	10.6409
Cytoplasm Actin Mean	-389.029	0.01	All PDAC	389.029	8.60373	1	8.60373
Cytoplasm Tubulin Mean	-846.394	0.1	All PDAC	846.394	9.72519	1	9.72519
Cytoplasm Actin Mean	-149.866	0.1	All PDAC	149.866	7.22753	1	7.22753
Actin Texture	-591.581	0.1	All PDAC	591.581	9.20843	1	9.20843
Cytoplasm Tubulin Mean	-967.343	10	All PDAC	967.343	9.91788	1	9.91788
Cytoplasm Actin Mean	-225.59	10	All PDAC	225.59	7.81756	1	7.81756
Cytoplasm Tubulin Mean	-3848.84	All	All PDAC	3848.84	11.9102	1	11.9102
Cytoplasm Actin Mean	-1138.07	All	All PDAC	1138.07	10.1524	1	10.1524
Cytoplasm Tubulin Mean	-743.705	0	MIA PaCa2	743.705	9.53859	1	9.53859
Elongatedness	-169.125	0	MIA PaCa2	169.125	7.40195	1	7.40195
Actin Texture	-171.914	0	MIA PaCa2	171.914	7.42554	1	7.42554
Cytoplasm Tubulin Mean	-326.513	0.01	MIA PaCa2	326.513	8.351	1	8.351
Actin Filament Cell Area	-130.289	0.01	MIA PaCa2	130.289	7.02557	1	7.02557
Actin Texture	-147.467	0.01	MIA PaCa2	147.467	7.20425	1	7.20425
Elongatedness	-127.136	0.01	MIA PaCa2	127.136	6.99023	1	6.99023
Cytoplasm Actin Mean	-69.4406	0.01	MIA PaCa2	69.4406	6.11771	1	6.11771
Cytoplasm Tubulin Mean	-1295.54	All	MIA PaCa2	1295.54	10.3393	1	10.3393
Actin Texture	-230.299	All	MIA PaCa2	230.299	7.84736	1	7.84736
Cytoplasm Actin Mean	-148.198	All	MIA PaCa2	148.198	7.21139	1	7.21139
Actin Filament Cell Area	-111.264	All	MIA PaCa2	111.264	6.79784	1	6.79784
Cytoplasm Actin Mean	-302.754	0	PANC1	302.754	8.242	1	8.242
Cytoplasm Tubulin Mean	-230.212	0	PANC1	230.212	7.84682	1	7.84682
Actin Texture	-12.0127	0	PANC1	12.0127	3.58649	1	3.58649
Cytoplasm Tubulin Mean	-494.931	0.01	PANC1	494.931	8.95108	1	8.95108
Actin Texture	-74.9786	0.01	PANC1	74.9786	6.22841	1	6.22841
Cytoplasm Tubulin Mean	-728.653	0.1	PANC1	728.653	9.50909	1	9.50909
Cytoplasm Actin Mean	-257.075	10	PANC1	257.075	8.00605	1	8.00605
Cell Area	-26.6295	10	PANC1	26.6295	4.73496	1	4.73496
Cytoplasm Tubulin Mean	-695.333	All	PANC1	695.333	9.44156	1	9.44156
Cytoplasm Actin Mean	-382.945	All	PANC1	382.945	8.58099	1	8.58099
Cell Area	-22.3418	All	PANC1	22.3418	4.48168	1	4.48168
Actin Texture	-1.35904	All	PANC1	1.35904	0.442593	1	0.442593
Cytoplasm Tubulin Mean	-280.595	0	Capan1	280.595	8.13234	1	8.13234
Actin Texture	-131.436	0	Capan1	131.436	7.03821	1	7.03821
Cytoplasm Actin Mean	-472.607	0	Capan1	472.607	8.8845	1	8.8845
Cytoplasm Tubulin Mean	-444.184	0.01	Capan1	444.184	8.79501	1	8.79501
Cytoplasm Actin Mean	-190.053	0.01	Capan1	190.053	7.57026	1	7.57026
Actin Texture	-154.72	0.01	Capan1	154.72	7.27352	1	7.27352
Nucleus Roundness	-16.9128	0.01	Capan1	16.9128	4.08005	1	4.08005
Cell Area	-208.105	0.1	Capan1	208.105	7.70117	1	7.70117
Actin Texture	-228.451	0.1	Capan1	228.451	7.83574	1	7.83574
Cytoplasm Actin Mean	-265.92	0.1	Capan1	265.92	8.05485	1	8.05485
Membrane Cytoplasm Actin	-39.8565	0.1	Capan1	39.8565	5.31674	1	5.31674
Cytoplasm Tubulin Mean	-661.114	10	Capan1	661.114	9.36876	1	9.36876
Actin Texture	-69.1022	10	Capan1	69.1022	6.11066	1	6.11066
Cytoplasm Actin Mean	-261.135	10	Capan1	261.135	8.02865	1	8.02865
Cytoplasm Tubulin Mean	-1316.84	All	Capan1	1316.84	10.3629	1	10.3629
Cytoplasm Actin Mean	-1031.42	All	Capan1	1031.42	10.0104	1	10.0104
Actin Texture	-300.51	All	Capan1	300.51	8.23127	1	8.23127
Cytoplasm Tubulin Mean	-196.783	0	SW1990	196.783	7.62046	1	7.62046
Cytoplasm Actin Mean	-55.1954	0	SW1990	55.1954	5.78648	1	5.78648
Membrane Cytoplasm Actin	-64.8966	0	SW1990	64.8966	6.02007	1	6.02007
Cell Roundness	-41.8549	0	SW1990	41.8549	5.38733	1	5.38733
Nucleus Roundness	-23.5682	0	SW1990	23.5682	4.55877	1	4.55877
Cell Area	-0.348759	0	SW1990	0.348759	-1.5197	1	-1.5197
Cytoplasm Tubulin Mean	-145.983	0.01	SW1990	145.983	7.18965	1	7.18965
Cytoplasm Actin Mean	-33.5921	0.01	SW1990	33.5921	5.07005	1	5.07005
Membrane Cytoplasm Actin	-47.0782	0.01	SW1990	47.0782	5.55699	1	5.55699
Cell Roundness	-39.3668	0.01	SW1990	39.3668	5.29891	1	5.29891
Nucleus Roundness	-10.6603	0.01	SW1990	10.6603	3.41418	1	3.41418
Cell Area	-2.0079	0.01	SW1990	2.0079	1.00569	1	1.00569
Membrane Cytoplasm Actin	-5.78928	0.1	SW1990	5.78928	2.53338	1	2.53338
Cell Roundness	-23.1691	0.1	SW1990	23.1691	4.53413	1	4.53413
Cytoplasm Actin Mean	-69.0671	0.1	SW1990	69.0671	6.10993	1	6.10993
Actin Texture	-17.0848	0.1	SW1990	17.0848	4.09464	1	4.09464
Cell Area	-9.289	0.1	SW1990	9.289	3.21552	1	3.21552
Cell Roundness	-34.272	10	SW1990	34.272	5.09896	1	5.09896
Cytoplasm Actin Mean	-122.744	10	SW1990	122.744	6.93951	1	6.93951
Actin Texture	-21.2329	10	SW1990	21.2329	4.40823	1	4.40823
Cytoplasm Tubulin Mean	-507.331	All	SW1990	507.331	8.98678	1	8.98678
Membrane Cytoplasm Actin	-99.9503	All	SW1990	99.9503	6.64314	1	6.64314
Cell Roundness	-121.533	All	SW1990	121.533	6.9252	1	6.9252
Cytoplasm Actin Mean	-86.1203	All	SW1990	86.1203	6.42828	1	6.42828
Cell Area	-4.25701	All	SW1990	4.25701	2.08984	1	2.08984
Actin Texture	-3.32261	All	SW1990	3.32261	1.73232	1	1.73232
Cytoplasm Tubulin Mean	-314.842	0	PANC05.04	314.842	8.29848	1	8.29848
Membrane Cytoplasm Actin	-135.04	0	PANC05.04	135.04	7.07725	1	7.07725
Cytoplasm Tubulin Mean	-219.787	0.01	PANC05.04	219.787	7.77996	1	7.77996
Membrane Cytoplasm Actin	-90.2824	0.01	PANC05.04	90.2824	6.49637	1	6.49637
Cytoplasm Tubulin Mean	-176.998	0.1	PANC05.04	176.998	7.46759	1	7.46759
Membrane Cytoplasm Actin	-154.443	0.1	PANC05.04	154.443	7.27093	1	7.27093
Cytoplasm Actin Mean	-104.069	0.1	PANC05.04	104.069	6.70139	1	6.70139
Cytoplasm Actin Mean	-110.155	10	PANC05.04	110.155	6.7834	1	6.7834
Membrane Cytoplasm Actin	-24.5675	10	PANC05.04	24.5675	4.61868	1	4.61868
Cytoplasm Tubulin Mean	-724.584	All	PANC05.04	724.584	9.50101	1	9.50101
Membrane Cytoplasm Actin	-361.601	All	PANC05.04	361.601	8.49826	1	8.49826

## Sheet: Fig2 F raw data
Cell_line	TNF	Drug	Nuc_RELA_Mean	Actin_Filament_Cell_Area	Actin_Texture	Cell_Area	Cell_Roundness	Cytoplasm_Actin_Mean	Cytoplasm_Tubulin_Mean	Elongatedness	Membrane_Cytoplasm_Actin	Nucleus_Roundness	Tubulin_Texture
MIA	0.1	Control	1.05544	0.947107	0.981624	0.989594	1.00633	0.794729	1.22338	1.01984	1.04864	0.999983	0.968376
PANC1	0.1	Control	1.01386	0.970632	0.966653	0.952926	1.01634	0.95856	0.811752	1.00612	1.0996	0.994756	0.997395
MIA	0.1	Control	1.07179	1.00675	0.969023	0.986646	1.00181	0.832208	1.18568	1.02124	1.03923	1.00288	0.978961
PANC1	0.1	Control	1.03866	1.20868	1.03764	0.923068	1.01697	1.02807	1.07746	0.988716	1.0615	0.994165	1.00909
MIA	10	Control	1.0817	1.15574	0.955919	0.959824	1.01133	1.03292	0.937541	0.981892	1.04386	0.999223	0.985111
PANC1	10	Control	1.04448	1.09158	1.03014	1.00648	1.02875	0.739917	1.00502	0.971413	1.08847	0.996514	0.988817
MIA	10	Control	1.1085	1.20994	0.954708	0.984306	1.00876	1.04111	0.860315	0.992601	1.06267	1.0004	1.00417
PANC1	10	Control	1.09179	1.26097	1.05108	0.984376	1.03687	0.930295	0.998233	0.943142	1.0966	0.999919	0.9968
MIA	0	Control	0.813499	0.77331	0.99305	0.956956	1.00705	0.617194	1.44218	1.02286	1.03473	1.00495	0.987064
PANC1	0	Control	0.886971	1.01869	0.983293	0.958814	1.00714	0.948913	0.933378	1.00927	1.13328	1.00069	1.00151
MIA	0	Control	0.895019	0.828756	1.00097	0.930735	1.01716	0.726623	1.34689	0.98676	1.05232	1.00506	0.978044
PANC1	0	Control	0.902889	0.99755	0.987944	1.00698	1.01036	0.972497	0.85961	1.01586	1.11492	0.990854	1.02455
MIA	0.01	Control	1.00746	0.801418	0.9851	0.946978	1.01361	0.731665	1.41097	1.01526	1.05693	1.0019	0.967162
PANC1	0.01	Control	0.943146	0.983279	1.03868	0.912868	1.00326	0.947324	1.08613	1.02335	1.08789	0.99426	0.994622
MIA	0.01	Control	0.970869	1.01757	0.971484	0.937137	1.02038	0.881266	1.11174	0.995661	1.03396	1.00487	0.979122
PANC1	0.01	Control	0.932355	1.02745	0.984148	0.961644	1.01535	1.00723	0.896302	0.985934	1.06314	0.995003	1.02252
MIA	0.1	Control	0.789164	1.08011	0.891378	0.955847	0.988318	0.962372	1.28215	1.03305	1.0323	0.994779	0.953223
PANC1	0.1	Control	0.938309	0.738751	0.906426	1.03726	1.0023	0.879424	1.04502	1.00059	1.0721	0.999828	0.961903
MIA	0.1	Control	1.02773	1.08896	0.960512	0.974371	1.00667	0.959127	0.958812	1.02103	1.04644	1.00001	1.00494
PANC1	0.1	Control	0.955893	1.08726	1.02843	0.971646	1.03656	0.840296	1.3221	0.968975	1.07038	1.00238	0.980742
MIA	0.1	Control	1.06774	1.04277	0.989322	0.948616	1.02086	0.940549	1.0119	0.984652	1.03507	1.00345	0.989569
PANC1	0.1	Control	0.994148	1.02409	1.00018	1.00937	1.02341	0.920787	1.04979	0.986704	1.09055	1.00013	1.00082
MIA	0.1	Control	0.787208	1.01254	0.944199	0.970271	0.99633	0.926353	1.39695	1.05953	1.02772	0.996927	0.969063
PANC1	0.1	Control	0.960646	0.838583	0.912818	1.01263	1.00605	0.945047	1.02446	0.988226	1.05691	1.00043	0.96959
MIA	0.1	Control	1.07154	1.07843	0.977919	0.956795	1.00019	0.927963	0.980256	1.05374	1.06167	1.00234	1.02854
PANC1	0.1	Control	0.983292	1.16446	1.01464	0.970315	1.02222	0.960988	1.21529	0.995988	1.09492	0.99863	0.981276
MIA	0.1	Control	1.08905	1.19079	0.951157	0.946235	1.00733	1.01455	0.849864	1.02251	1.02961	1.00406	1.00182
PANC1	0.1	Control	0.981816	1.07199	0.992413	0.999458	1.01594	0.845573	1.01586	1.00675	1.1386	0.999396	1.00177
MIA	10	Control	0.827423	0.957628	0.850959	0.969935	0.981226	0.994195	1.28441	1.05651	1.03362	0.995438	0.954943
PANC1	10	Control	1.0986	1.1534	0.959064	1.07693	1.00824	0.955901	1.06629	0.989512	1.0472	0.99835	0.992523
MIA	10	Control	1.17636	1.09496	0.897994	0.992199	1.00253	0.944931	0.85683	1.02786	1.06794	1.0011	1.01363
PANC1	10	Control	1.14317	1.25242	0.958689	0.985042	1.03016	0.887517	1.10562	0.966418	1.07004	0.996089	0.960841
MIA	10	Control	1.1093	1.10678	0.976209	0.963141	1.01165	0.960655	1.14715	1.00711	1.06915	1.00184	0.997559
PANC1	10	Control	1.07608	1.17078	1.00023	1.01034	1.02544	0.905257	1.03195	0.975386	1.13184	0.992879	0.989539
MIA	10	Control	0.844727	1.01226	0.848432	0.971811	0.984784	1.01015	1.24668	1.03746	1.03085	0.997273	0.948619
PANC1	10	Control	1.1489	1.10982	0.917589	1.03264	1.01254	0.991922	1.1968	0.971213	1.07018	0.997632	0.952489
MIA	10	Control	1.09294	0.782718	0.972085	0.996306	1.00926	0.77403	1.5058	1.02134	1.06799	0.99811	0.966999
PANC1	10	Control	1.11606	1.23299	0.975232	0.977367	1.03211	0.883549	1.10419	0.988474	1.07483	0.993991	0.98189
MIA	10	Control	1.09348	1.27226	0.971847	0.964754	1.01202	1.05772	0.91107	1.00118	1.05768	0.999206	1.00419
PANC1	10	Control	1.09852	0.977564	0.90026	0.970261	1.02025	0.866852	0.923103	0.975161	1.14571	0.994212	0.97741
MIA	0	Control	0.623244	0.761619	0.929572	0.935214	1.00499	0.793617	1.40832	1.01369	1.05586	1.00021	0.982031
PANC1	0	Control	0.876448	0.85131	0.93527	1.06185	1.00382	0.851915	1.07566	0.998189	1.09919	1.00066	0.970803
MIA	0	Control	0.819294	1.09371	1.01015	0.966252	1.00482	0.970921	1.1687	1.03158	1.05762	1.00334	1.00718
PANC1	0	Control	0.869114	1.13331	0.978553	1.02896	1.02607	0.95059	1.03039	0.970133	1.10106	0.999252	0.972805
MIA	0	Control	0.810987	1.01965	0.961595	0.918609	1.02016	0.83169	1.25225	0.980627	1.05621	1.00158	0.971396
PANC1	0	Control	0.885387	1.28619	1.03095	0.956372	1.01668	1.0106	1.03791	0.977349	1.06907	1.00087	1.00356
MIA	0	Control	0.603009	0.757438	0.888022	0.985172	0.990026	0.883402	1.25832	1.0297	1.04447	1.00135	0.984976
PANC1	0	Control	0.833345	1.01804	0.949181	1.11591	1.00746	0.831395	1.01731	1.00365	1.08438	0.999962	0.969478
MIA	0	Control	0.804829	1.33325	0.973418	0.998293	0.993037	0.942987	0.866389	1.07828	1.02785	1.00062	1.03893
PANC1	0	Control	0.883129	0.984428	0.954561	0.95723	1.01822	0.889284	0.965225	0.989039	1.09836	0.998205	0.971585
MIA	0	Control	0.809379	1.15771	0.944335	0.968278	1.00435	0.97416	1.03527	1.02399	1.0471	1.00019	1.00982
PANC1	0	Control	0.865204	1.06665	1.02208	0.970699	1.00613	0.953219	1.0686	1.02755	1.07092	1.00026	1.00611
MIA	0.01	Control	0.686515	0.893865	0.882646	0.96198	0.990811	0.918308	1.28171	1.02319	1.0199	0.99576	0.979848
PANC1	0.01	Control	0.873027	0.871486	0.907867	1.03079	0.999955	0.88066	1.0564	1.00497	1.08829	0.99953	0.964891
MIA	0.01	Control	0.980296	1.22217	0.969181	0.933532	1.00862	0.952422	0.829215	1.03822	1.0267	1.00433	1.02864
PANC1	0.01	Control	0.907238	1.04439	0.996394	0.969417	1.02693	0.868883	1.05901	0.972292	1.06616	0.998239	0.958944
MIA	0.01	Control	0.932114	1.09678	0.94974	0.990419	0.999883	0.984472	0.948969	1.03969	1.06373	0.997184	0.996139
PANC1	0.01	Control	0.937152	1.17642	1.04306	0.961752	1.00238	0.963593	1.14391	1.03864	1.07175	0.997899	0.99542
MIA	0.01	Control	0.639298	0.79963	0.90789	0.97821	0.979406	0.868132	1.2711	1.06934	1.03838	0.996095	1.00655
PANC1	0.01	Control	0.880305	0.864022	0.914359	1.06763	0.996776	0.902375	0.984732	1.01896	1.05895	0.997918	0.972962
MIA	0.01	Control	0.942291	0.997029	0.97435	0.978333	1.00926	0.921715	1.139	1.00648	1.03791	1.00342	0.994756
PANC1	0.01	Control	0.901417	1.0188	0.995999	0.945609	1.02361	0.847639	1.15992	0.989852	1.09387	0.998379	0.94749
MIA	0.01	Control	0.919872	0.918767	0.959899	0.945459	1.01086	0.828526	1.188	1.00449	1.04555	0.999082	1.00514
PANC1	0.01	Control	0.965931	1.07222	1.0306	0.985573	1.01666	0.982261	1.07414	1.00686	1.06899	1.00029	0.994529
MIA	0.1	CK666	0.813743	1.0524	1.09251	0.991424	0.998084	0.836111	1.08798	1.09094	1.01062	1.00845	1.04636
PANC1	0.1	CK666	0.96912	2.3192	1.27698	1.11298	0.954272	1.05897	0.980806	1.05651	1.05889	1.00099	1.13533
MIA	0.1	Control	1.11938	1.39488	0.980854	0.905343	1.01802	1.10886	0.922261	0.984109	1.03486	1.00601	1.00107
PANC1	0.1	Control	0.988328	1.37962	1.10165	0.95166	1.04216	1.08771	1.11754	0.961148	1.06082	0.997833	0.991596
MIA	0.1	CK666	1.05698	1.06786	1.1333	0.945593	1.03794	0.935855	0.838753	0.977246	1.00352	1.00999	1.01807
PANC1	0.1	CK666	1.09116	1.40381	1.20264	0.927055	1.00906	1.19768	1.09248	0.974142	1.0503	1.00542	1.04947
MIA	0.1	CK666	0.83566	1.13578	1.11217	1.04541	0.999852	0.814369	1.21894	1.08998	0.997674	1.00852	1.0636
PANC1	0.1	CK666	0.969535	2.4145	1.32771	1.12089	0.957191	1.05457	1.02013	1.05566	1.0389	1.0003	1.14538
MIA	0.1	Control	1.09114	1.2584	0.983758	0.935576	1.00733	0.986965	1.21319	1.03509	1.01821	1.00037	0.993504
PANC1	0.1	Control	0.991627	1.35897	1.11644	0.93869	1.0202	1.08632	1.04575	0.998139	0.998531	0.993488	1.00671
MIA	0.1	CK666	1.02889	1.04581	1.12384	0.957562	1.02008	0.882249	0.943401	1.02265	1.00236	1.00487	1.04343
PANC1	0.1	CK666	1.05495	1.39001	1.20379	0.931041	1.02172	1.21394	1.08847	0.966281	1.0657	1.00668	1.04581
MIA	10	CK666	0.872795	1.2169	1.06385	1.05488	0.980793	0.854941	1.05432	1.11577	0.994256	1.00674	1.05868
PANC1	10	CK666	1.02738	2.24612	1.29393	1.10153	0.947573	0.997485	0.953523	1.06764	1.04814	0.99894	1.14703
MIA	10	Control	1.1587	1.01529	0.81921	0.943508	1.00759	0.895701	1.14861	0.998297	1.08848	1.00266	0.962027
PANC1	10	Control	1.20292	1.27883	0.958375	0.976299	1.02372	1.01671	1.07915	0.980139	1.1109	0.998858	0.96138
MIA	10	CK666	1.05316	1.14847	1.12112	0.97152	1.02161	0.873059	0.881164	1.02319	0.98499	1.0113	1.04882
PANC1	10	CK666	1.10053	1.32033	1.18676	0.974568	1.02085	1.23589	1.10547	0.948561	1.06486	1.00812	1.05279
MIA	10	CK666	0.882073	1.0366	0.983449	1.04183	0.981373	0.808897	1.04749	1.10535	1.02562	1.00794	1.06914
PANC1	10	CK666	1.03231	2.33105	1.23512	1.11155	0.959366	0.987802	0.974499	1.04479	1.04927	1.00211	1.10928
MIA	10	Control	1.18528	1.24141	0.929191	0.992786	1.00243	0.969744	1.0537	1.02439	1.05959	0.996071	1.00424
PANC1	10	Control	1.15981	1.58678	1.03557	0.987538	1.02997	1.01924	0.976312	0.979316	1.01573	0.995485	0.983236
MIA	10	CK666	1.05893	1.24638	1.13791	0.974187	1.01827	0.921641	0.898362	1.03626	0.975864	1.00852	1.04562
PANC1	10	CK666	1.06573	1.38235	1.19136	0.957658	1.00833	1.20009	1.05929	0.99084	1.05389	1.00418	1.06172
MIA	0	CK666	0.636145	1.11725	1.08822	0.983131	1.00944	0.82804	1.16896	1.04313	1.02133	1.00855	1.04742
PANC1	0	CK666	0.953321	2.02886	1.15376	0.995798	0.947947	1.04794	1.01137	1.04611	1.09119	0.99921	1.05697
MIA	0	Control	0.853087	1.19656	0.903764	0.92161	1.00755	0.980891	1.16897	1.00016	1.06235	1.00223	0.989306
PANC1	0	Control	0.868297	1.31525	0.995292	0.947417	1.03041	1.00928	0.995101	0.970146	1.08407	1.00175	0.983467
MIA	0	CK666	0.838396	1.02239	1.11227	0.950176	1.01323	0.787081	1.00869	1.03652	0.999277	1.00813	1.02138
PANC1	0	CK666	0.913793	1.22314	1.14651	0.968159	1.01073	1.0665	1.03808	0.975122	1.11636	1.00236	1.02423
MIA	0	CK666	0.65319	1.23535	1.1005	0.941905	1.01332	0.84705	1.1752	1.03554	1.0218	1.00875	1.015
PANC1	0	CK666	0.975603	2.20886	1.16638	1.03391	0.93321	1.01994	0.940328	1.07461	1.05562	1.00108	1.10115
MIA	0	Control	0.843339	1.25583	1.01296	0.992057	0.993098	1.07016	1.03406	1.064	1.03914	1.00137	1.01431
PANC1	0	Control	0.874436	1.5949	1.17593	0.970169	1.0292	1.11711	1.24266	0.975256	1.00953	0.991479	1.00154
MIA	0	CK666	0.8666	1.1122	1.17634	0.969285	1.01708	0.854122	0.915631	1.03066	0.960645	1.01162	1.03251
PANC1	0	CK666	0.945168	1.20429	1.17789	0.895063	1.00948	1.12945	1.04582	0.977204	1.12426	1.00277	1.02742
MIA	0.01	CK666	0.689195	0.999282	0.992413	1.00206	0.988972	0.834764	1.08199	1.06734	1.04049	1.00598	1.04262
PANC1	0.01	CK666	1.01142	2.00194	1.27793	1.07962	0.914269	1.09271	0.962527	1.10875	1.06267	0.999449	1.19352
MIA	0.01	Control	0.995167	1.49075	0.996693	0.951956	1.00873	1.09867	0.977874	1.00533	1.00914	1.00135	1.00456
PANC1	0.01	Control	0.888705	1.0608	0.956351	0.964699	1.02054	0.899422	1.16479	1.00283	1.10125	0.99513	0.967159
MIA	0.01	CK666	0.945234	1.10684	1.12369	0.971542	1.02353	0.827078	1.02703	1.02158	0.990714	1.00541	1.01371
PANC1	0.01	CK666	1.03926	1.4153	1.18538	0.989579	1.00949	1.30216	1.15958	0.969973	1.04577	1.00698	1.0441
MIA	0.01	CK666	0.717926	1.05552	1.03506	0.988337	0.986716	0.832311	1.18959	1.08839	1.02315	1.00696	1.03375
PANC1	0.01	CK666	0.954682	2.63292	1.29105	1.11669	0.965114	1.04893	0.968811	1.05594	1.06222	1.00007	1.13833
MIA	0.01	Control	0.996145	1.42816	0.979491	0.978414	1.00709	1.02566	0.940117	1.0348	1.01232	1.00022	1.01794
PANC1	0.01	Control	0.913967	1.34294	1.07197	0.960322	1.02547	1.0362	1.14244	0.996374	1.02381	0.996683	0.993437
MIA	0.01	CK666	0.924181	1.03467	1.11197	0.94457	1.01965	0.833214	0.930741	1.0268	1.00467	1.00398	1.05578
PANC1	0.01	CK666	1.02474	1.37007	1.204	0.97457	1.02288	1.22203	1.16552	0.950269	1.04149	1.00896	1.0441
MIA	0.1	Cyto D	0.957366	1.11471	1.06683	0.775933	1.06231	1.44427	1.32241	0.847901	0.876558	0.982551	0.949291
PANC1	0.1	Cyto D	1.20604	1.0455	1.73282	0.605733	1.06273	1.55306	1.49629	0.882695	0.427381	0.980086	1.11324
MIA	0.1	CK666	1.0419	1.19062	1.14386	1.03627	1.00174	0.895929	0.892279	1.13286	1.02006	1.00987	1.05377
PANC1	0.1	CK666	0.988392	1.3158	1.13566	0.960311	0.981087	1.09651	1.05462	1.02203	1.10407	1.00282	1.078
MIA	0.1	Cyto D	1.15308	0.315356	0.860224	0.794564	1.04662	1.32139	1.56531	0.858199	0.798898	0.98038	0.981939
PANC1	0.1	Cyto D	1.20004	0.132622	0.899636	0.612404	0.979948	1.55622	1.562	0.966409	0.459131	0.980663	1.02639
MIA	0.1	Cyto D	0.957148	1.09773	1.06188	0.783184	1.0597	1.46382	1.55314	0.860042	0.863442	0.985375	0.948284
PANC1	0.1	Cyto D	1.22049	0.966144	1.72775	0.607573	1.06874	1.57102	1.53646	0.879191	0.423935	0.981522	1.11133
MIA	0.1	CK666	1.05669	1.07151	1.08591	1.01572	1.00178	0.892484	0.852125	1.11086	1.03408	1.00542	1.05407
PANC1	0.1	CK666	0.991935	1.27927	1.13388	0.982725	1.0083	1.0866	1.07865	0.982261	1.10853	1.00377	1.0397
MIA	0.1	Cyto D	1.09735	0.38226	0.85253	0.820372	1.04985	1.45528	1.50129	0.856227	0.782421	0.986826	0.974614
PANC1	0.1	Cyto D	1.20139	0.0854581	0.912023	0.597055	0.989366	1.59361	1.38899	0.93273	0.461827	0.979224	1.04301
MIA	10	Cyto D	1.0071	1.10444	1.08116	0.798812	1.0647	1.29612	1.66625	0.849302	0.840675	0.983412	0.935447
PANC1	10	Cyto D	1.39147	1.05213	1.73059	0.615252	1.07365	1.70246	1.617	0.876434	0.403771	0.982859	1.11152
MIA	10	CK666	1.13993	1.06931	1.06526	1.04138	0.995065	0.84368	0.938403	1.1301	1.03324	1.00513	1.04578
PANC1	10	CK666	1.04897	1.19957	1.16752	0.938507	0.991383	1.05095	1.10233	1.00767	1.08568	1.0047	1.06111
MIA	10	Cyto D	1.23535	0.27764	0.832225	0.80045	1.04092	1.80335	1.06773	0.846916	0.793452	0.982152	0.986632
PANC1	10	Cyto D	1.30701	0.0753672	0.910523	0.632116	0.986534	1.42111	1.37232	0.939843	0.436208	0.976424	1.01408
MIA	10	Cyto D	0.960349	1.1522	1.08596	0.785971	1.05452	1.35275	1.46999	0.869145	0.858051	0.98467	0.946066
PANC1	10	Cyto D	1.38421	0.886893	1.75187	0.605124	1.06047	1.72487	1.64423	0.899772	0.427895	0.980207	1.11637
MIA	10	CK666	1.13342	1.18602	1.11504	1.00872	1.00125	0.875287	0.813849	1.11232	1.01625	1.00683	1.06407
PANC1	10	CK666	1.05869	1.32516	1.14037	0.943903	1.00494	1.01001	1.10102	0.99514	1.04541	0.999859	1.03629
MIA	10	Cyto D	1.20987	0.375065	0.895679	0.825832	1.04861	1.62139	1.27493	0.854652	0.766427	0.983848	0.972072
PANC1	10	Cyto D	1.23417	0.0832838	0.858998	0.643296	0.980701	1.30935	1.51049	0.940383	0.429229	0.980075	1.0194
MIA	0	Cyto D	0.710764	1.24427	1.02539	0.765079	1.05814	1.38873	1.25476	0.847449	0.914973	0.984113	0.939022
PANC1	0	Cyto D	1.17414	1.20445	1.70074	0.620893	1.05437	1.53849	1.51268	0.900996	0.435778	0.980795	1.10873
MIA	0	CK666	0.825359	0.997781	1.03117	0.981487	1.00193	0.887106	0.766916	1.07483	1.06517	1.00866	1.0505
PANC1	0	CK666	0.929796	1.16871	1.14124	0.939486	0.983767	1.06101	0.908873	1.0149	1.14503	0.998798	1.07762
MIA	0	Cyto D	0.835831	0.460105	0.863435	0.814278	1.04859	1.40762	1.43512	0.849099	0.783365	0.985034	0.96385
PANC1	0	Cyto D	1.08673	0.0634903	0.898774	0.597082	0.970105	1.68467	1.49133	0.95929	0.459601	0.986784	1.05914
MIA	0	Cyto D	0.728813	1.27593	1.05564	0.777248	1.06321	1.39764	1.40687	0.839897	0.878472	0.983801	0.955415
PANC1	0	Cyto D	1.15068	1.24125	1.71235	0.618483	1.05622	1.50617	1.58956	0.89081	0.417233	0.981424	1.12333
MIA	0	CK666	0.888574	1.12704	1.04736	1.02683	0.985585	0.885017	0.779035	1.1319	1.05876	1.00903	1.06601
PANC1	0	CK666	0.922478	1.21709	1.16591	0.916081	0.993232	1.16237	1.12693	0.994366	1.14227	1.00021	1.05222
MIA	0	Cyto D	0.868981	0.324316	0.863271	0.804173	1.04644	1.58406	1.39033	0.860651	0.772043	0.986757	0.969959
PANC1	0	Cyto D	1.09478	0.0753831	0.905214	0.640588	0.993416	1.61552	1.58549	0.935965	0.424719	0.979206	1.03776
MIA	0.01	Cyto D	0.803955	1.12458	1.04323	0.759582	1.06357	1.32655	1.46853	0.840541	0.894076	0.984464	0.950836
PANC1	0.01	Cyto D	1.23281	1.15018	1.7434	0.600538	1.06689	1.62226	1.55063	0.88191	0.4339	0.98295	1.10818
MIA	0.01	CK666	0.926337	1.08121	1.04427	0.991535	1.00832	0.917501	0.722591	1.06244	1.05417	1.00767	1.06155
PANC1	0.01	CK666	0.946647	1.11807	1.13198	0.925945	0.975095	1.04017	1.03964	1.02801	1.12058	1.00178	1.0729
MIA	0.01	Cyto D	0.976289	0.451746	0.858089	0.8516	1.04196	1.378	1.5023	0.862915	0.797295	0.984404	0.976197
PANC1	0.01	Cyto D	1.10224	0.0831137	0.879799	0.627994	0.992747	1.70622	1.35655	0.942624	0.424435	0.98589	1.04284
MIA	0.01	Cyto D	0.830236	1.1337	1.03563	0.794959	1.05175	1.49709	1.43056	0.859331	0.870882	0.98278	0.946789
PANC1	0.01	Cyto D	1.2251	1.06293	1.73796	0.600117	1.0597	1.61544	1.53939	0.89676	0.430317	0.980127	1.11433
MIA	0.01	CK666	0.92178	0.992924	0.998239	1.00923	0.987637	0.881158	0.859045	1.08124	1.07695	1.0097	1.03893
PANC1	0.01	CK666	0.959164	1.24855	1.17065	0.948501	0.988841	1.07885	0.960242	1.00692	1.09608	1.00072	1.08377
MIA	0.01	Cyto D	0.924445	0.405958	0.821982	0.762192	1.04937	1.12506	1.49123	0.847354	0.843784	0.984331	0.955739
PANC1	0.01	Cyto D	1.12832	0.0713216	0.910249	0.615142	1.00635	1.61584	1.53417	0.915839	0.433506	0.977835	1.01988
MIA	0.1	H1152	0.828098	0.604755	0.721488	1.18146	0.944453	0.858561	1.189	1.09553	1.08231	0.996355	1.0199
PANC1	0.1	H1152	0.970843	0.340245	0.847691	0.999587	0.966422	0.881402	1.03748	1.02362	1.05553	0.996856	1.00508
MIA	0.1	Cyto D	1.21822	0.392001	0.977665	0.770886	1.08742	1.73095	1.69726	0.770711	0.695403	0.98531	0.902404
PANC1	0.1	Cyto D	1.23549	0.0983928	1.02372	0.587889	0.982545	1.75705	1.69477	0.92876	0.41771	0.970649	1.05892
MIA	0.1	H1152	1.03921	0.755909	0.822674	1.18636	0.935328	0.745938	1.25167	1.15615	1.15809	0.992917	1.06752
PANC1	0.1	H1152	0.984681	0.32046	0.870891	1.21807	0.932294	0.695641	0.827567	1.09064	1.056	0.996845	1.06789
MIA	0.1	H1152	0.85893	0.752004	0.766903	1.20995	0.934398	0.875687	1.1342	1.13467	1.06641	0.995978	1.03788
PANC1	0.1	H1152	0.956885	0.274229	0.84303	0.994886	0.962923	0.865455	1.02245	1.02773	1.04704	0.994756	1.00815
MIA	0.1	Cyto D	1.19371	0.3899	0.957638	0.725202	1.07779	1.73671	1.50708	0.782484	0.782197	0.985656	0.918705
PANC1	0.1	Cyto D	1.27057	0.0897492	0.997599	0.539296	0.996292	1.69814	1.68072	0.938273	0.451371	0.979053	1.02047
MIA	0.1	H1152	1.05937	0.945349	0.769985	1.20444	0.920498	0.849377	0.926187	1.17283	1.16531	0.990257	1.08308
PANC1	0.1	H1152	0.969352	0.388788	0.885453	1.15339	0.936155	0.725695	0.883024	1.08303	1.06078	0.999247	1.08221
MIA	10	H1152	0.8403	0.688656	0.782943	1.21945	0.934301	0.854724	1.11688	1.14581	1.06996	0.994318	1.03329
PANC1	10	H1152	1.13961	0.275816	0.835243	0.987083	0.967218	0.858797	0.999033	1.01399	1.04166	0.996322	0.992759
MIA	10	Cyto D	1.23098	0.416215	0.948201	0.769832	1.07183	1.53746	1.71867	0.807183	0.751169	0.979387	0.916389
PANC1	10	Cyto D	1.44082	0.107487	0.988674	0.597166	0.987256	1.76756	1.54516	0.936873	0.394719	0.981133	1.03379
MIA	10	H1152	1.13099	1.09139	0.777946	1.15945	0.935849	0.939072	0.941588	1.12191	1.18321	0.984184	1.06973
PANC1	10	H1152	1.07327	0.40984	0.869669	1.22245	0.942828	0.734739	0.870089	1.05343	1.04597	0.995213	1.07772
MIA	10	H1152	0.944717	0.697301	0.712806	1.20297	0.928454	0.908439	0.956019	1.13457	1.06038	0.994187	1.03004
PANC1	10	H1152	1.16573	0.283989	0.829357	0.946902	0.962075	0.895807	1.02048	1.01923	1.0363	0.992599	0.974582
MIA	10	Cyto D	1.23044	0.497819	0.953244	0.765665	1.06506	1.37174	1.92991	0.814045	0.757264	0.980632	0.901948
PANC1	10	Cyto D	1.40265	0.0996671	1.03966	0.558179	0.999255	1.79698	1.53683	0.915522	0.414141	0.97798	1.03084
MIA	10	H1152	1.14945	1.07228	0.779869	1.20992	0.90855	0.946551	0.805363	1.19479	1.17868	0.990206	1.08907
PANC1	10	H1152	1.09259	0.427781	0.852	1.2696	0.935961	0.760699	0.910878	1.07461	1.03633	0.99869	1.09335
MIA	0	H1152	0.638654	0.600852	0.721677	1.14423	0.947658	0.868954	1.11699	1.07749	1.0672	0.99723	0.981906
PANC1	0	H1152	0.973793	0.369422	0.873106	0.875239	0.978272	0.940457	1.06926	1.00641	1.10129	0.993751	0.969824
MIA	0	Cyto D	0.910957	0.376234	0.946328	0.715813	1.08696	1.78381	1.14802	0.761646	0.793264	0.985106	0.914146
PANC1	0	Cyto D	1.14048	0.146384	1.02356	0.567232	0.988982	1.63709	1.64885	0.930009	0.438903	0.97832	1.02121
MIA	0	H1152	0.738239	0.946314	0.763652	1.18983	0.920516	0.786831	1.00553	1.15069	1.15442	0.983314	1.07797
PANC1	0	H1152	0.851039	0.334713	0.846774	1.19761	0.931107	0.68856	0.853008	1.10198	1.10637	0.997964	1.06197
MIA	0	H1152	0.631171	0.599384	0.713858	1.14391	0.945072	0.868103	1.07678	1.0731	1.06144	0.995442	0.996528
PANC1	0	H1152	0.930941	0.330279	0.870516	0.948375	0.965374	0.965196	0.994242	1.02321	1.04928	0.995161	0.989168
MIA	0	Cyto D	0.889011	0.382244	0.950529	0.743769	1.08099	1.59985	1.50002	0.776961	0.741913	0.980372	0.907309
PANC1	0	Cyto D	1.14921	0.0638998	1.01545	0.555983	0.980598	1.95303	1.57761	0.957975	0.437048	0.981858	1.05893
MIA	0	H1152	0.725786	0.864426	0.794128	1.21613	0.937381	0.780008	1.07847	1.14774	1.17369	0.988153	1.07345
PANC1	0	H1152	0.853753	0.347122	0.858415	1.13011	0.917836	0.753748	0.933249	1.12937	1.09058	0.994565	1.07443
MIA	0.01	H1152	0.740836	0.479298	0.69608	1.133	0.934574	0.83515	1.00797	1.10593	1.06992	0.994267	1.00742
PANC1	0.01	H1152	0.957623	0.358028	0.887928	0.981165	0.957141	0.962436	1.06363	1.04404	1.04417	0.995848	1.00244
MIA	0.01	Cyto D	1.05972	0.350549	0.939851	0.723233	1.08161	1.73272	1.30727	0.773889	0.786166	0.98592	0.917595
PANC1	0.01	Cyto D	1.16284	0.15219	1.03424	0.525993	1.0062	1.63566	1.66131	0.920215	0.44229	0.977008	1.02103
MIA	0.01	H1152	0.908276	0.942482	0.785026	1.18631	0.926693	0.802418	0.946297	1.15981	1.1616	0.988265	1.09482
PANC1	0.01	H1152	0.938472	0.436336	0.869298	1.16449	0.91643	0.793645	0.854175	1.13339	1.06915	0.993241	1.10482
MIA	0.01	H1152	0.756856	0.50451	0.683805	1.17697	0.947042	0.840827	1.12773	1.08068	1.07271	0.997226	1.01332
PANC1	0.01	H1152	0.948113	0.27372	0.865588	0.961322	0.972571	0.888637	0.994872	1.00313	1.02998	0.994941	1.00345
MIA	0.01	Cyto D	1.09203	0.290106	0.968559	0.753164	1.08382	1.91113	1.37851	0.764406	0.72513	0.982781	0.928789
PANC1	0.01	Cyto D	1.19199	0.076226	1.029	0.562229	0.980493	1.7704	1.51272	0.943201	0.407488	0.974042	1.06713
MIA	0.01	H1152	0.908289	0.724197	0.806666	1.18126	0.929907	0.710425	1.16736	1.17014	1.14556	0.984941	1.06259
PANC1	0.01	H1152	0.931752	0.486733	0.922895	1.18484	0.922136	0.802443	0.869563	1.11797	1.04726	0.998843	1.10662
MIA	0.1	Blebb	0.888712	0.56815	0.791121	1.12943	0.92141	0.804563	1.3677	1.16178	1.13245	0.991777	1.07099
PANC1	0.1	Blebb	0.991829	0.365921	0.879777	0.935751	0.974712	0.944825	1.1409	1.01485	1.06015	0.995539	0.97178
MIA	0.1	H1152	1.10195	1.17871	0.741212	1.20204	0.915119	0.843241	0.788171	1.14564	1.09707	0.986033	1.04185
PANC1	0.1	H1152	1.00303	0.348133	0.834916	1.13796	0.930461	0.718945	0.964584	1.07666	1.10313	0.99582	1.01831
MIA	0.1	Blebb	1.12118	0.798246	0.798905	1.17324	0.901114	0.860386	1.1848	1.2384	1.23017	0.989518	1.10263
PANC1	0.1	Blebb	0.959569	0.54585	0.943081	1.14947	0.933982	0.782796	0.960782	1.11123	1.05168	1.00186	1.09314
MIA	0.1	Blebb	0.899741	0.652976	0.764652	1.07568	0.945908	0.898952	1.21866	1.09886	1.11441	0.992279	1.05512
PANC1	0.1	Blebb	0.977266	0.464989	0.88974	0.986934	0.960814	0.975391	1.05315	1.0429	1.03806	0.997886	0.98915
MIA	0.1	H1152	1.11525	1.05732	0.738901	1.18773	0.914518	0.854003	0.829126	1.17295	1.10389	0.988421	1.02726
PANC1	0.1	H1152	0.989122	0.447417	0.884137	1.08507	0.923685	0.782572	0.917659	1.10182	1.06308	0.997524	1.04648
MIA	0.1	Blebb	1.09022	0.741048	0.80862	1.19936	0.897087	0.789617	1.15991	1.22318	1.22513	0.995135	1.10876
PANC1	0.1	Blebb	1.05719	0.57283	0.892797	1.16771	0.927358	0.840646	0.873652	1.12614	1.01851	0.9959	1.0794
MIA	10	Blebb	0.895593	0.556768	0.738072	1.08972	0.938042	0.824759	1.32662	1.12679	1.12261	0.994768	1.05847
PANC1	10	Blebb	1.17846	0.405713	0.876472	0.976403	0.977898	1.02466	0.98023	1.00789	1.022	0.995976	0.965943
MIA	10	H1152	1.16768	0.976636	0.767029	1.26392	0.904615	0.793063	1.01212	1.20007	1.11765	0.986344	1.03355
PANC1	10	H1152	1.18627	0.401305	0.837347	1.13428	0.951259	0.771086	0.814745	1.01828	1.07398	0.993095	1.03549
MIA	10	Blebb	1.21725	1.07528	0.801675	1.18371	0.870923	0.968495	0.836164	1.29306	1.21886	0.994432	1.13928
PANC1	10	Blebb	1.12057	0.485499	0.879208	1.12854	0.937936	0.829432	0.866906	1.10095	1.02968	1.00117	1.0856
MIA	10	Blebb	0.945406	0.620436	0.773994	1.08757	0.935711	0.86804	1.29733	1.12993	1.11465	0.996334	1.06125
PANC1	10	Blebb	1.16292	0.524467	0.870674	0.980387	0.966361	1.05514	1.02	1.01521	1.0406	0.995995	0.971593
MIA	10	H1152	1.16061	0.969618	0.78694	1.231	0.901477	0.758322	0.769955	1.22938	1.10691	0.990746	1.05663
PANC1	10	H1152	1.17014	0.375067	0.846424	1.13488	0.938647	0.742031	0.885929	1.05324	1.0966	0.996839	1.04622
MIA	10	Blebb	1.13866	0.837389	0.7997	1.19233	0.895862	0.850935	1.14003	1.26191	1.25465	0.993161	1.09311
PANC1	10	Blebb	1.02252	0.350014	0.875711	1.14732	0.943308	0.65567	0.917421	1.09757	1.06225	0.99459	1.05729
MIA	0	Blebb	0.673816	0.633033	0.730233	0.976244	0.950252	0.929524	1.15954	1.05035	1.12566	0.987929	0.976676
PANC1	0	Blebb	0.879135	0.371037	0.89401	0.99815	0.96532	0.878748	1.12374	1.03371	1.08654	0.999006	0.969651
MIA	0	H1152	0.703627	0.990188	0.752437	1.23143	0.909867	0.805854	0.933609	1.16449	1.13414	0.98995	1.03875
PANC1	0	H1152	0.882221	0.452284	0.854389	1.10298	0.927014	0.827972	0.827697	1.08572	1.09755	0.998469	1.04194
MIA	0	Blebb	0.741309	0.864602	0.778401	1.12041	0.8953	0.809158	1.0161	1.24455	1.21844	0.992718	1.11112
PANC1	0	Blebb	0.851784	0.554315	0.94721	1.14225	0.936124	0.829175	1.00001	1.10541	1.01203	1.00256	1.06869
MIA	0	Blebb	0.650557	0.550029	0.83236	1.10977	0.933177	0.827071	1.24057	1.13618	1.10084	0.993898	1.08184
PANC1	0	Blebb	0.902479	0.428341	0.94088	1.03842	0.966743	0.897002	1.07308	1.04601	1.06577	1.00074	1.01678
MIA	0	H1152	0.739888	1.07574	0.735661	1.21439	0.908157	0.810103	0.84762	1.14916	1.11825	0.988571	1.04675
PANC1	0	H1152	0.892484	0.418213	0.889616	1.07688	0.928158	0.778321	0.954219	1.08549	1.09353	0.997668	1.03546
MIA	0	Blebb	0.750186	0.758931	0.80188	1.14448	0.906754	0.792984	1.19581	1.22108	1.20074	0.994995	1.08713
PANC1	0	Blebb	0.917417	0.697514	0.943562	1.13007	0.945644	0.89835	1.02847	1.105	1.03728	1.00153	1.05122
MIA	0.01	Blebb	0.752583	0.461195	0.804079	1.08391	0.9319	0.771362	1.27253	1.13439	1.11167	0.989318	1.07363
PANC1	0.01	Blebb	0.949737	0.392673	0.883028	0.981692	0.966516	0.938364	1.0765	1.03591	1.05395	0.998054	0.975165
MIA	0.01	H1152	0.857845	1.00891	0.784828	1.20858	0.911838	0.821063	0.867395	1.16583	1.12229	0.989585	1.05273
PANC1	0.01	H1152	0.953847	0.381184	0.872744	1.13978	0.928851	0.783909	0.897599	1.07876	1.08172	0.994273	1.03539
MIA	0.01	Blebb	0.920316	0.756482	0.785413	1.15668	0.915614	0.792187	1.17455	1.18689	1.21863	0.990316	1.0886
PANC1	0.01	Blebb	0.959814	0.683335	0.938053	1.16668	0.950046	0.907829	0.968209	1.10145	0.997774	0.999094	1.08252
MIA	0.01	Blebb	0.652294	0.664983	0.779598	1.09576	0.931985	0.915624	1.07219	1.12492	1.11407	0.989248	1.064
PANC1	0.01	Blebb	0.951883	0.410676	0.891805	0.968174	0.971439	0.960507	1.10523	1.02238	1.05251	0.995362	0.978815
MIA	0.01	H1152	0.896423	0.912051	0.745743	1.17948	0.923273	0.827336	1.00484	1.13346	1.13656	0.988055	1.03023
PANC1	0.01	H1152	0.96528	0.470822	0.881732	1.08885	0.914394	0.827037	0.749603	1.12376	1.05612	0.996588	1.05324
MIA	0.01	Blebb	0.955693	1.08748	0.784989	1.15525	0.894388	0.889664	0.896382	1.24541	1.20203	0.992082	1.12044
PANC1	0.01	Blebb	0.940559	0.554169	0.921148	1.11708	0.935044	0.845226	0.967863	1.13012	1.02017	1.00204	1.0821
MIA	0.1	SMIFH2	0.788479	0.767582	1.01574	1.02413	0.996915	0.666577	0.378461	0.976063	0.920745	1.00237	1.18384
PANC1	0.1	SMIFH2	0.938538	1.00489	0.944237	1.05743	1.00219	0.959164	1.07284	1.00234	1.05254	1.00423	0.957732
MIA	0.1	Blebb	1.08124	0.918794	0.854146	1.15849	0.900831	0.798069	1.18697	1.1833	1.14637	0.994306	1.07171
PANC1	0.1	Blebb	0.949514	0.719562	0.94673	1.05372	0.949029	0.858207	0.876967	1.10426	0.994397	0.996771	1.03379
MIA	0.1	SMIFH2	0.980765	0.997247	0.951185	0.972991	0.995188	0.747642	0.335598	0.980951	0.934234	0.996222	1.21244
PANC1	0.1	SMIFH2	1.06202	1.36266	1.03207	0.980384	1.02071	1.15049	1.12668	0.978554	1.0189	1.00182	0.99419
MIA	0.1	SMIFH2	0.721825	0.794007	1.00244	0.974213	0.992091	0.728412	0.30969	0.971811	0.933233	1.00267	1.19915
PANC1	0.1	SMIFH2	0.928263	1.09292	0.98758	1.08036	1.00056	0.958917	1.0267	1.0037	1.04351	1.00304	0.981369
MIA	0.1	Blebb	1.11736	1.24759	0.885809	1.14373	0.875033	0.955567	0.984935	1.29478	1.15057	0.988413	1.10248
PANC1	0.1	Blebb	0.96313	0.755527	0.967348	1.10212	0.941643	0.918116	0.99069	1.13317	1.00503	0.992865	1.05744
MIA	0.1	SMIFH2	0.933511	1.00962	0.955631	0.985824	1.00552	0.74877	0.310568	0.939329	0.928017	1.00199	1.1969
PANC1	0.1	SMIFH2	1.02446	1.26332	1.05061	0.921938	1.01014	0.993922	1.16602	0.994678	1.01878	1.00136	0.985297
MIA	10	SMIFH2	0.626723	0.850937	0.994014	0.998822	0.988522	0.733002	0.323959	0.992387	0.942338	1.00405	1.19465
PANC1	10	SMIFH2	1.08568	1.27901	0.961648	1.1048	1.00946	0.927139	1.01619	0.996496	1.04424	1.00245	0.971083
MIA	10	Blebb	1.16614	1.11125	0.841325	1.2217	0.869552	0.884429	0.869807	1.28955	1.1373	0.994284	1.10048
PANC1	10	Blebb	1.16867	0.777832	0.906764	1.0986	0.961775	0.928379	0.780879	1.04862	0.976883	0.996632	1.06486
MIA	10	SMIFH2	1.00498	0.779033	0.960151	0.92509	1.02	0.639498	0.346849	0.894781	0.882572	0.998576	1.20187
PANC1	10	SMIFH2	1.06315	1.20486	1.04418	0.992385	1.02448	0.895833	1.11802	0.957998	1.00596	1.00247	0.99715
MIA	10	SMIFH2	0.596133	0.874519	1.01489	0.986779	0.989203	0.763245	0.29882	0.990163	0.919077	1.0044	1.18514
PANC1	10	SMIFH2	1.06425	1.03271	0.950199	1.09337	1.00828	0.890714	0.987629	0.990653	1.02529	1.00023	0.96062
MIA	10	Blebb	1.21791	1.10803	0.854577	1.19685	0.879322	0.913299	0.849338	1.27849	1.14523	0.994924	1.09367
PANC1	10	Blebb	1.13977	0.719862	0.943757	1.22127	0.970988	0.88999	0.970626	1.04585	0.966684	0.995472	1.04818
MIA	10	SMIFH2	0.911153	0.921236	0.937242	0.952199	1.00162	0.698398	0.321624	0.93945	0.922904	1.00454	1.19061
PANC1	10	SMIFH2	1.09181	1.23692	1.04772	0.958474	1.02462	0.922269	1.13991	0.969085	1.03694	1.00008	0.983238
MIA	0	SMIFH2	0.737823	0.565227	0.960636	0.92153	1.00375	0.655904	0.470498	0.962674	0.934912	1.00134	1.15904
PANC1	0	SMIFH2	0.878733	1.01349	0.948724	1.0377	0.990716	0.908465	1.02431	1.02206	1.05377	1.0031	0.966067
MIA	0	Blebb	0.750501	0.93287	0.763005	1.0515	0.912641	0.856482	1.16683	1.15317	1.1788	0.993385	1.03129
PANC1	0	Blebb	0.840009	0.534197	0.907433	1.07437	0.955915	0.781398	1.03785	1.0733	1.07229	0.998962	1.02429
MIA	0	SMIFH2	0.829422	0.863955	0.973077	0.967854	1.00367	0.681583	0.369812	0.975072	0.932959	1.00078	1.17866
PANC1	0	SMIFH2	0.869478	1.16801	0.981904	0.926834	1.00535	0.93063	1.17048	1.00298	1.07649	1.00087	0.95797
MIA	0	SMIFH2	0.79338	0.389755	0.966707	0.945487	1.02036	0.537375	0.363986	0.919065	0.89317	1.00304	1.21698
PANC1	0	SMIFH2	0.903848	0.935015	0.956987	1.017	0.987237	1.03567	0.948985	1.03932	1.05008	0.998982	0.971253
MIA	0	Blebb	0.746144	0.955538	0.820042	1.10605	0.914815	0.814719	1.01967	1.16925	1.15899	0.993805	1.05527
PANC1	0	Blebb	0.86087	0.698001	1.02226	1.08605	0.941322	0.867883	1.10391	1.11802	1.00362	1.00037	1.04772
MIA	0	SMIFH2	0.874256	0.812589	0.982248	0.896364	1.02761	0.644599	0.404401	0.920617	0.900601	1.00555	1.17232
PANC1	0	SMIFH2	0.901833	1.05621	0.990872	0.958703	1.00817	0.944981	1.18879	0.995729	1.04885	0.999368	0.977051
MIA	0.01	SMIFH2	0.792913	0.585212	0.997835	0.994519	1.00115	0.598408	0.277607	0.96846	0.894706	1.00025	1.22371
PANC1	0.01	SMIFH2	0.807479	0.926027	0.956322	1.06349	0.993628	0.979346	1.12507	1.01851	1.04567	0.998111	0.974713
MIA	0.01	Blebb	0.874783	0.875311	0.790225	1.10927	0.90785	0.819467	1.01717	1.18408	1.17166	0.991581	1.05151
PANC1	0.01	Blebb	0.917819	0.687072	0.998922	1.07096	0.953034	0.912484	0.95645	1.11164	1.00034	0.99397	1.06112
MIA	0.01	SMIFH2	0.927124	0.85188	0.964326	0.915165	1.01738	0.677314	0.353295	0.919665	0.918571	0.999838	1.18272
PANC1	0.01	SMIFH2	0.987009	1.37735	1.02673	0.93311	1.01094	1.15042	1.18408	0.984115	1.00033	0.999842	0.99108
MIA	0.01	SMIFH2	0.770708	0.772003	0.920519	0.978138	0.986102	0.729511	0.428612	0.966529	0.952347	1.0016	1.18264
PANC1	0.01	SMIFH2	0.873969	1.0457	0.947133	1.08994	1.00471	0.942954	1.03709	1.0137	1.04236	1.00337	0.980691
MIA	0.01	Blebb	0.92616	1.2155	0.852921	1.17067	0.881252	0.926907	0.842789	1.25655	1.1435	0.993952	1.08711
PANC1	0.01	Blebb	0.905178	0.786271	0.968843	1.15352	0.953865	0.925258	0.894349	1.07171	0.972275	1.00421	1.04532
MIA	0.01	SMIFH2	0.931011	0.975923	0.959992	0.979803	0.997633	0.751655	0.323593	0.950989	0.909295	1.00241	1.19867
PANC1	0.01	SMIFH2	1.00937	1.31591	1.06257	0.917988	1.01086	1.04635	1.23006	0.982215	0.99907	1.00109	0.999963
MIA	0.1	Vinblastine	0.73537	1.56945	1.22222	0.955126	1.01066	1.11116	0.407111	0.947537	0.958757	1.00021	0.950058
PANC1	0.1	Vinblastine	0.950402	0.860889	0.893819	1.00773	1.01525	0.963285	0.485729	0.986908	0.958076	1.00569	1.12323
MIA	0.1	SMIFH2	1.0962	0.43092	1.04957	0.762793	1.06986	0.522002	0.44408	0.813947	0.820777	1.0048	1.21225
PANC1	0.1	SMIFH2	1.00832	0.980573	0.971187	0.932864	1.01496	0.910429	1.1896	0.986932	1.03285	0.998	0.9629
MIA	0.1	Vinblastine	1.08465	1.38528	1.17622	0.947381	1.00917	1.14393	0.521628	0.908288	0.903274	0.998715	0.924067
PANC1	0.1	Vinblastine	1.03343	1.21398	1.11128	0.966971	1.00748	0.979129	0.481687	0.993488	0.907816	1.0064	1.01387
MIA	0.1	Vinblastine	0.722622	1.63841	1.2386	0.923636	1.02251	1.10518	0.512883	0.928121	0.963249	1.00005	0.925975
PANC1	0.1	Vinblastine	0.952574	1.10161	0.892	1.03098	0.99993	1.00559	0.442072	0.996572	0.970979	1.00534	1.15484
MIA	0.1	SMIFH2	0.966232	0.596579	1.0534	0.800133	1.06218	0.55587	0.464897	0.84047	0.848168	1.00528	1.19211
PANC1	0.1	SMIFH2	0.981926	1.1101	0.992151	1.02164	1.01341	0.914256	1.18043	0.997282	1.02051	1.00242	0.975201
MIA	0.1	Vinblastine	1.06194	1.309	1.23871	0.918035	1.03228	1.18709	0.577527	0.8952	0.908991	1.0051	0.907602
PANC1	0.1	Vinblastine	1.00567	1.26436	1.08722	1.04697	0.994974	0.976378	0.441069	1.00266	0.938588	1.00786	1.02013
MIA	10	Vinblastine	0.766081	1.63207	1.1819	0.985048	1.00596	1.05132	0.620659	0.952313	0.950464	0.999354	0.913032
PANC1	10	Vinblastine	1.07821	1.16986	0.90384	1.05591	1.00462	1.09938	0.394803	1.00088	0.954975	1.00565	1.14908
MIA	10	SMIFH2	1.02853	0.475458	1.04166	0.839658	1.06331	0.512535	0.563609	0.827205	0.828839	0.998386	1.17511
PANC1	10	SMIFH2	1.14948	1.03498	1.00911	0.997337	1.03099	0.948644	1.04541	0.933865	1.01259	1.00129	0.97618
MIA	10	Vinblastine	1.1546	1.48461	1.17359	0.938834	1.02202	1.28474	0.451545	0.880075	0.941625	1.00894	0.931252
PANC1	10	Vinblastine	1.13462	1.22102	1.09959	0.987497	0.997801	1.20881	0.347741	1.01163	0.9071	1.00076	1.07341
MIA	10	Vinblastine	0.764796	1.63861	1.20725	0.96772	1.00939	1.03014	0.53501	0.958083	0.946351	1.00313	0.925991
PANC1	10	Vinblastine	1.07083	1.21243	0.892987	1.04973	1.00445	1.08341	0.439169	0.997959	0.964561	1.00391	1.1325
MIA	10	SMIFH2	0.993332	0.584508	1.01743	0.812606	1.04728	0.586553	0.46624	0.84951	0.831855	0.997998	1.19732
PANC1	10	SMIFH2	1.16593	1.08869	1.01087	0.945097	1.02666	0.924503	1.06645	0.969703	1.01477	1.00197	0.973625
MIA	10	Vinblastine	1.1697	1.4786	1.21575	0.908255	1.03316	1.34401	0.448818	0.895602	0.937169	1.0087	0.91209
PANC1	10	Vinblastine	1.09519	1.22455	1.05904	0.982092	0.995752	1.08018	0.398961	1.00488	0.942279	1.00977	1.02968
MIA	0	Vinblastine	0.56333	1.58769	1.21385	0.936538	1.00763	1.08001	0.679852	0.949641	0.963826	1.00284	0.900795
PANC1	0	Vinblastine	0.930306	1.12092	0.922031	1.02643	1.00365	0.964529	0.49309	0.999439	0.978601	1.00696	1.13128
MIA	0	SMIFH2	0.860846	0.720464	0.979461	0.898914	1.03107	0.633433	0.426703	0.865109	0.900472	1.00063	1.21241
PANC1	0	SMIFH2	0.85332	1.29359	1.02861	0.931949	1.02008	0.952759	1.19321	0.974179	1.03416	1.00022	0.980097
MIA	0	Vinblastine	0.807122	1.17004	1.1822	0.924168	0.99765	1.13279	0.548994	0.937241	0.926704	1.01071	0.939485
PANC1	0	Vinblastine	0.908586	1.26195	1.0524	0.990494	0.999752	1.05209	0.43198	0.996352	0.941812	1.01045	1.01307
MIA	0	Vinblastine	0.579278	1.525	1.23891	0.985571	1.00081	1.14099	0.358579	0.959771	0.947235	1.00317	0.945274
PANC1	0	Vinblastine	0.923749	1.23432	0.924865	1.06618	1.01257	0.96476	0.465806	0.986551	0.965555	1.00855	1.13831
MIA	0	SMIFH2	0.955732	0.341758	1.02585	0.803025	1.06996	0.488407	0.470081	0.816589	0.831966	1.00425	1.20062
PANC1	0	SMIFH2	0.880946	1.07587	1.02867	0.945621	1.01638	0.94074	1.19468	0.998588	1.01754	1.00108	0.971832
MIA	0	Vinblastine	0.852553	1.29936	1.23294	0.932742	1.00833	1.26083	0.559912	0.928954	0.90161	1.00638	0.925663
PANC1	0	Vinblastine	0.919834	1.2689	1.07945	1.03462	0.994669	1.11438	0.448288	0.997059	0.925091	1.00036	1.02576
MIA	0.01	Vinblastine	0.651963	1.65411	1.18813	0.919343	1.00886	1.17322	0.634999	0.946918	0.964995	1.00146	0.917321
PANC1	0.01	Vinblastine	0.983615	1.01535	0.897217	0.992943	1.00354	1.03281	0.50934	1.00116	0.97797	1.00569	1.13705
MIA	0.01	SMIFH2	0.981908	0.649455	1.03043	0.816615	1.05682	0.609695	0.446855	0.831631	0.857951	0.999949	1.19621
PANC1	0.01	SMIFH2	0.941597	1.16792	1.03775	0.89607	1.00751	0.95671	1.16987	0.9902	1.00274	0.999115	0.960902
MIA	0.01	Vinblastine	0.948098	1.34143	1.20275	0.899123	1.01095	1.09861	0.599118	0.932534	0.899305	1.00527	0.919496
PANC1	0.01	Vinblastine	0.99224	1.26681	1.08025	1.01102	0.99226	1.07528	0.442909	1.03795	0.921516	1.00241	1.02095
MIA	0.01	Vinblastine	0.647566	1.62225	1.24076	0.945188	1.00922	1.10352	0.537887	0.943541	0.945364	1.00332	0.941376
PANC1	0.01	Vinblastine	0.965164	0.998614	0.885196	1.007	1.01609	0.979544	0.509646	0.986502	0.981069	1.00554	1.12608
MIA	0.01	SMIFH2	0.980697	0.564015	1.04184	0.850948	1.05497	0.573587	0.512079	0.85553	0.854271	1.00055	1.19498
PANC1	0.01	SMIFH2	0.952395	1.0614	0.998571	0.946518	1.00443	0.966903	1.08212	1.01016	1.01405	1.00266	0.978145
MIA	0.01	Vinblastine	0.982517	1.30793	1.19485	0.921862	1.01035	1.20445	0.506703	0.923046	0.917548	1.00659	0.931321
PANC1	0.01	Vinblastine	1.01742	1.26924	1.09971	0.968568	1.00295	1.2176	0.418945	1.00059	0.929016	1.00068	1.06022
MIA	0.1	PTX	0.882907	0.899587	0.987113	0.940892	1.06987	1.01104	1.36582	0.905752	1.00443	1.00699	0.896264
PANC1	0.1	PTX	0.9819	0.817671	0.833159	1.05999	1.0863	0.880536	1.3489	0.910288	1.12538	1.00697	0.809614
MIA	0.1	Vinblastine	1.13102	1.20955	1.24993	1.00766	0.99928	1.08824	0.595047	0.964198	0.909377	1.00622	0.896053
PANC1	0.1	Vinblastine	1.0393	1.13437	1.15078	1.01184	1.00288	1.0811	0.460554	0.985523	0.881137	1.01182	1.05459
MIA	0.1	PTX	1.08597	1.07447	1.00441	1.01655	1.0758	0.876572	2.07733	0.856733	0.995831	1.0116	0.844643
PANC1	0.1	PTX	1.04466	1.15017	1.00908	0.945833	1.07656	1.02836	1.80979	0.868512	1.07189	1.00895	0.785824
MIA	0.1	PTX	0.894352	0.952428	0.945697	0.921337	1.06042	1.03564	1.30941	0.906977	1.02174	1.00309	0.870652
PANC1	0.1	PTX	0.980077	1.16356	0.85372	1.07411	1.07728	0.937218	1.3639	0.920422	1.12379	1.00614	0.82169
MIA	0.1	Vinblastine	1.14567	1.29852	1.28095	1.0103	0.994593	1.3614	0.392052	0.948591	0.904532	1.00418	0.943459
PANC1	0.1	Vinblastine	1.01453	1.10771	1.0731	0.99963	0.994146	1.03958	0.439357	0.988765	0.90341	1.00727	1.05511
MIA	0.1	PTX	1.15006	1.30233	0.991783	0.949728	1.06707	1.13392	1.45149	0.878066	0.991456	1.00926	0.873647
PANC1	0.1	PTX	1.05548	1.36389	0.965212	0.988903	1.0763	1.11219	1.69596	0.861545	1.088	1.00984	0.796424
MIA	10	PTX	1.04871	1.03783	0.962421	0.953106	1.05959	1.00534	1.3723	0.924508	1.0266	1.00459	0.881447
PANC1	10	PTX	1.19375	1.01134	0.862279	1.08344	1.08055	0.875147	1.31109	0.9179	1.11379	1.00655	0.812326
MIA	10	Vinblastine	1.18607	1.29345	1.2193	0.974738	1.01547	1.28815	0.390631	0.910384	0.949081	1.00909	0.945277
PANC1	10	Vinblastine	1.02802	1.16501	1.07253	1.06011	0.998084	1.04349	0.42576	0.977994	0.86386	1.00988	1.06174
MIA	10	PTX	1.16804	1.17211	1.01026	1.0382	1.06837	1.12078	1.70378	0.847266	0.986464	1.00977	0.839045
PANC1	10	PTX	1.15079	1.36562	0.966155	0.983393	1.07574	1.02376	1.69607	0.873262	1.10355	1.00129	0.772407
MIA	10	PTX	0.998033	0.973279	0.932212	0.915511	1.05765	0.992683	1.67151	0.915734	1.06272	1.0083	0.884447
PANC1	10	PTX	1.20159	0.911129	0.819198	1.059	1.07695	0.831651	1.2932	0.925461	1.10889	1.00715	0.807178
MIA	10	Vinblastine	1.20505	1.33399	1.23184	1.01594	1.00917	1.33748	0.419626	0.94005	0.95266	1.00852	0.932799
PANC1	10	Vinblastine	1.04671	1.13799	1.15012	0.991663	0.9977	1.06047	0.447092	1.00877	0.881815	1.00849	1.05422
MIA	10	PTX	1.11528	1.17666	0.991065	1.04832	1.05509	1.0621	1.63778	0.885154	1.01928	1.00829	0.882489
PANC1	10	PTX	1.07843	1.22017	1.00212	1.00203	1.08678	0.827811	1.79175	0.846121	1.09283	1.00909	0.770159
MIA	0	PTX	0.574722	0.83169	0.962542	0.924756	1.0688	0.905025	1.53189	0.90037	1.01819	1.00388	0.873267
PANC1	0	PTX	0.941341	0.992241	0.867477	1.02179	1.06555	0.896483	1.34811	0.936234	1.14529	1.00441	0.813142
MIA	0	Vinblastine	0.854184	1.40202	1.23594	0.977843	0.988715	1.28531	0.343488	0.999922	0.939654	1.01058	0.971902
PANC1	0	Vinblastine	0.91286	1.18818	1.03878	0.97288	0.98972	1.04903	0.391154	1.00325	0.912709	1.00493	1.0858
MIA	0	PTX	0.850871	1.08289	1.00365	0.998724	1.06066	0.802179	2.22358	0.870016	1.00284	1.00702	0.855621
PANC1	0	PTX	0.911644	1.08769	0.907946	0.970577	1.06563	0.854297	1.79858	0.880869	1.16381	1.0044	0.799181
MIA	0	PTX	0.673001	0.745755	0.973738	0.917834	1.07225	0.894487	1.64871	0.889573	1.0304	1.00647	0.903589
PANC1	0	PTX	0.932336	0.839353	0.868616	1.03789	1.07181	0.986706	1.3174	0.93005	1.12734	1.00687	0.830932
MIA	0	Vinblastine	0.898846	1.34957	1.26707	0.969893	0.990569	1.2926	0.389911	0.972273	0.923027	1.00268	0.949496
PANC1	0	Vinblastine	0.938879	1.31254	1.13743	0.992776	0.99239	1.15346	0.452885	1.00209	0.893856	1.00953	1.08505
MIA	0	PTX	0.898156	1.32989	0.974914	0.960542	1.05675	1.03254	1.81943	0.863969	0.974787	1.00362	0.844802
PANC1	0	PTX	0.89771	0.92452	0.943669	1.00852	1.07528	0.869856	1.9031	0.86718	1.16767	1.01348	0.766036
MIA	0.01	PTX	0.80816	0.768748	0.972337	0.906124	1.07543	0.935814	1.4341	0.888588	1.02432	1.0051	0.903732
PANC1	0.01	PTX	0.962465	0.82085	0.837565	1.0035	1.06967	0.924543	1.35586	0.933046	1.13636	1.00438	0.799228
MIA	0.01	Vinblastine	1.00929	1.31397	1.19691	0.945892	1.00679	1.25809	0.469851	0.931598	0.942294	1.0094	0.922567
PANC1	0.01	Vinblastine	0.957758	0.979978	1.08681	1.02381	1.00214	1.03948	0.386834	0.977207	0.880923	1.00843	1.08154
MIA	0.01	PTX	1.0606	1.17494	0.97976	1.0041	1.06234	1.13019	1.57849	0.86359	0.992637	1.00853	0.882561
PANC1	0.01	PTX	0.940479	1.14211	0.961186	0.985486	1.07495	0.911811	1.84732	0.869268	1.0975	1.00969	0.770715
MIA	0.01	PTX	0.789182	0.736481	0.946686	0.910205	1.07348	0.976211	1.40128	0.880505	1.02542	1.0049	0.878297
PANC1	0.01	PTX	0.957234	0.677027	0.818847	0.970236	1.07465	0.906768	1.36607	0.922261	1.14442	1.00658	0.799181
MIA	0.01	Vinblastine	1.07147	1.42309	1.33779	0.939497	1.01144	1.386	0.374949	0.929639	0.90703	1.00964	0.937369
PANC1	0.01	Vinblastine	0.994498	1.13861	1.10133	0.969685	0.999082	1.11173	0.40762	0.989668	0.886003	1.00355	1.09935
MIA	0.01	PTX	0.966977	0.992555	0.986834	0.967563	1.06806	0.774879	2.14351	0.858234	0.978726	1.00747	0.84734
PANC1	0.01	PTX	1.01533	1.09307	0.927834	1.01108	1.07007	0.965936	1.83035	0.872572	1.1027	1.00738	0.774872
MIA	0.1	Noc	1.03956	1.30936	1.09927	0.937541	1.04254	1.11143	0.724292	0.904951	0.983155	1.00733	1.0521
PANC1	0.1	Noc	0.990862	1.00324	0.898046	1.06918	1.03436	0.908243	1.07494	0.949965	1.10203	1.00746	0.990888
MIA	0.1	PTX	1.13193	1.13995	1.05128	0.919022	1.08665	0.993339	2.17527	0.841198	1.00894	1.00784	0.859417
PANC1	0.1	PTX	1.02882	0.994878	0.86387	0.942698	1.0646	0.884799	1.63261	0.911414	1.18238	1.00609	0.801953
MIA	0.1	Noc	1.05609	1.12167	1.10957	0.920981	1.03728	0.977016	0.815307	0.897625	0.971834	1.00749	0.93916
PANC1	0.1	Noc	1.08561	1.31093	1.02208	0.946236	1.055	1.13955	0.926945	0.899925	1.06246	1.00941	0.979211
MIA	0.1	Noc	1.02155	1.29208	1.11801	0.922659	1.04975	1.12485	0.70117	0.89012	0.979966	1.00657	1.03925
PANC1	0.1	Noc	0.983191	1.2149	0.928835	1.06711	1.02837	0.990051	0.960257	0.959672	1.10298	1.00563	1.0165
MIA	0.1	PTX	1.13675	1.09543	1.03597	0.957674	1.087	0.945159	2.23415	0.852713	1.00263	1.00759	0.828323
PANC1	0.1	PTX	1.00257	1.08798	0.961466	0.946614	1.08785	0.840845	1.54023	0.87682	1.11672	1.00569	0.801659
MIA	0.1	Noc	1.11861	1.13931	1.13743	0.959665	1.02959	1.0545	0.768997	0.888869	0.941215	0.999088	0.946703
PANC1	0.1	Noc	1.05537	1.31171	1.05146	0.898413	1.05746	1.17795	0.949764	0.913911	1.06915	1.00701	0.962784
MIA	10	Noc	1.03025	1.32173	1.09191	0.996136	1.02637	1.04716	0.79257	0.938143	0.986523	1.00312	1.02206
PANC1	10	Noc	1.16673	1.40274	0.900039	1.05744	1.02809	1.02997	1.03611	0.956589	1.09714	1.00754	1.00695
MIA	10	PTX	1.1918	0.85876	0.987229	0.957379	1.07942	0.910502	2.22713	0.867324	1.04512	1.00975	0.846487
PANC1	10	PTX	1.15666	1.08254	0.944782	0.977447	1.06999	0.842182	1.40721	0.909215	1.11365	1.00816	0.810648
MIA	10	Noc	1.17626	1.12752	1.0802	0.939606	1.02675	1.206	0.622966	0.899737	1.01486	1.0081	0.961142
PANC1	10	Noc	1.14181	1.10532	1.02267	0.98988	1.05583	0.967693	1.00537	0.889115	1.08823	0.998005	0.936112
MIA	10	Noc	1.00733	1.3171	1.13234	0.999352	1.02796	1.0189	0.738686	0.950264	0.982407	1.00774	1.04135
PANC1	10	Noc	1.16629	1.47656	0.883357	1.05286	1.02751	1.01296	1.05035	0.964469	1.08732	1.00614	0.988608
MIA	10	PTX	1.24826	0.963729	0.995901	0.945468	1.08088	0.96966	1.39374	0.864552	1.01513	1.0062	0.881676
PANC1	10	PTX	1.1685	1.2047	0.891447	1.02242	1.07465	0.852358	1.45589	0.907666	1.09684	1.01007	0.812413
MIA	10	Noc	1.14913	1.19385	1.13955	0.917053	1.04139	1.16124	0.69609	0.880816	0.998862	1.00787	0.95673
PANC1	10	Noc	1.11963	1.19932	1.02968	0.988495	1.05655	0.978386	0.997933	0.900978	1.09863	1.00637	0.93978
MIA	0	Noc	0.736482	1.03078	1.15815	0.928697	1.04419	1.00687	0.947978	0.912424	1.00797	1.007	1.02285
PANC1	0	Noc	0.899853	0.950454	0.874074	1.03507	1.01733	0.905713	1.08025	0.957356	1.14743	1.00807	0.980998
MIA	0	PTX	0.841217	1.07001	0.96912	0.903202	1.08098	1.07678	1.71485	0.875879	1.02592	1.00579	0.872489
PANC1	0	PTX	0.875633	1.01822	0.878349	1.01124	1.07276	0.82726	1.71565	0.897533	1.16574	1.00737	0.787985
MIA	0	Noc	0.80937	1.05951	1.15223	0.913183	1.03448	0.94519	0.860003	0.886718	0.931938	1.01069	0.948635
PANC1	0	Noc	0.871246	1.12548	1.02395	0.939027	1.05297	0.926766	1.07778	0.908477	1.13228	1.01097	0.956943
MIA	0	Noc	0.780032	1.15134	1.09239	0.911975	1.0414	1.14873	0.755884	0.909794	0.997781	1.00609	1.02877
PANC1	0	Noc	0.908132	1.15225	0.902803	1.08492	1.02755	0.892791	1.02174	0.960138	1.11453	1.00438	0.986249
MIA	0	PTX	0.83864	1.10203	1.03028	0.916837	1.08607	0.92085	2.34534	0.84515	0.999798	1.00669	0.862051
PANC1	0	PTX	0.917315	1.16418	0.941301	0.994864	1.0722	0.912968	1.43876	0.907172	1.10915	1.00744	0.820351
MIA	0	Noc	0.870957	1.01914	1.09988	0.948213	1.02128	1.03012	0.803665	0.915222	0.965128	1.00476	0.971653
PANC1	0	Noc	0.898587	1.27926	1.01605	0.953157	1.05554	1.04332	1.01113	0.893448	1.09206	1.01256	0.959834
MIA	0.01	Noc	0.856556	0.990597	1.10225	0.892457	1.04139	0.976072	0.971539	0.906672	1.00632	1.00505	1.02766
PANC1	0.01	Noc	0.921318	0.93093	0.897429	1.03093	1.03706	0.866065	1.01485	0.949356	1.11869	1.00759	0.972845
MIA	0.01	PTX	0.978989	0.998263	0.999636	0.894774	1.09097	0.915526	2.47416	0.826513	1.03064	1.00522	0.840778
PANC1	0.01	PTX	0.952672	0.895113	0.884859	0.965418	1.06461	0.80786	1.39771	0.906853	1.12288	1.00757	0.805706
MIA	0.01	Noc	1.06123	1.00991	1.12793	0.94139	1.0301	1.22072	0.748286	0.905486	0.9776	1.00866	0.993332
PANC1	0.01	Noc	0.981019	1.12689	0.968273	0.955438	1.05236	0.98352	1.03625	0.90694	1.12532	1.00557	0.944412
MIA	0.01	Noc	0.893081	1.26842	1.10559	0.92825	1.03894	1.11453	0.71127	0.918647	0.992925	1.00677	1.06098
PANC1	0.01	Noc	0.93408	0.909474	0.871327	1.03713	1.02603	0.921692	0.987911	0.956013	1.10904	1.00761	0.99053
MIA	0.01	PTX	1.04181	1.15157	1.04285	0.926054	1.08501	0.980657	1.86256	0.843665	0.989051	1.00566	0.858607
PANC1	0.01	PTX	0.95592	1.00021	0.915386	0.963636	1.08003	0.907391	1.4573	0.896399	1.11525	1.0042	0.798083
MIA	0.01	Noc	0.955952	1.10411	1.13329	0.922792	1.04527	0.924241	0.870187	0.873365	0.936465	1.00808	0.948872
PANC1	0.01	Noc	1.00917	1.16466	0.961894	0.961504	1.04978	1.02412	0.993884	0.913162	1.10223	1.00647	0.958948
MIA	0.1	Dem	1.93617	1.56694	1.30044	0.958002	1.0163	1.23598	0.561065	0.950203	0.967128	1.00683	0.897147
PANC1	0.1	Dem	0.967077	0.846392	0.954481	1.03469	1.02346	0.953494	0.401537	1.01623	0.95974	1.00571	1.03503
MIA	0.1	Noc	1.06145	1.20775	1.1	0.889271	1.06152	1.14939	0.822732	0.835593	0.993791	1.00644	1.00227
PANC1	0.1	Noc	0.993478	1.28455	1.02746	0.979042	1.05949	0.942044	0.938632	0.899562	1.09613	1.00727	0.965761
MIA	0.1	Dem	1.08566	1.27367	1.21861	0.912078	1.02159	1.20648	0.556198	0.892921	0.892608	1.00478	0.869309
PANC1	0.1	Dem	1.05232	1.46274	1.11515	0.99819	1.00829	1.24495	0.353296	0.997304	0.894081	1.00947	0.993241
MIA	0.1	Dem	1.9196	1.44925	1.32079	0.952717	1.01457	1.27174	0.414117	0.946381	0.947509	1.00578	0.922961
PANC1	0.1	Dem	0.956859	1.05697	0.967949	1.07934	1.02196	0.941586	0.459042	1.01583	0.96019	1.00737	1.00654
MIA	0.1	Noc	1.00875	0.986938	1.13903	0.944007	1.05588	0.92064	1.04945	0.855506	0.952679	1.00715	0.964184
PANC1	0.1	Noc	1.00009	1.20994	0.987739	0.996613	1.04635	0.945257	0.908386	0.920207	1.09295	1.00525	0.963736
MIA	0.1	Dem	1.11553	1.17678	1.23217	0.941449	1.02214	1.14348	0.601143	0.904163	0.837465	1.00663	0.863286
PANC1	0.1	Dem	1.00962	1.34981	1.11468	0.984185	0.985484	1.08055	0.410949	1.04216	0.894831	1.00651	0.978284
MIA	10	Dem	1.98206	1.49687	1.33726	1.01853	1.00616	1.25252	0.418583	0.975398	0.958285	1.003	0.936863
PANC1	10	Dem	1.07596	0.932804	0.934025	1.0508	1.01086	0.973915	0.440754	1.03108	0.969859	1.006	1.00022
MIA	10	Noc	1.1145	1.05581	1.08006	0.997559	1.04351	0.946264	0.886353	0.886658	0.999963	1.00758	0.988309
PANC1	10	Noc	1.1474	1.40762	1.02059	1.01751	1.06856	0.954411	0.937709	0.894614	1.04621	1.0102	0.95332
MIA	10	Dem	1.19037	1.16047	1.26107	0.907296	1.03596	1.58065	0.381375	0.887187	0.926801	1.00917	0.902161
PANC1	10	Dem	1.03925	1.32869	1.12632	0.965948	0.994366	0.973447	0.373839	1.011	0.914191	1.00605	0.968544
MIA	10	Dem	1.90877	1.34746	1.37991	1.02708	1.00707	1.13174	0.568223	0.977769	0.936623	1.00825	0.913641
PANC1	10	Dem	1.07314	0.907352	0.96625	1.08524	1.00904	0.94953	0.397529	1.02815	0.958334	1.00783	1.0431
MIA	10	Noc	1.14858	1.00692	1.1081	0.951655	1.06676	1.13047	0.759873	0.85546	0.990054	1.00955	0.991194
PANC1	10	Noc	1.15715	1.56025	0.987813	1.01709	1.06503	1.01281	0.847787	0.893437	1.05896	1.00882	0.95942
MIA	10	Dem	1.18311	1.35922	1.22949	0.926674	1.02077	1.58805	0.414028	0.904376	0.916409	1.0037	0.897091
PANC1	10	Dem	1.04981	1.36037	1.11489	1.0237	1.007	1.03893	0.382395	0.982742	0.907246	1.01232	0.979817
MIA	0	Dem	0.733804	1.15852	1.26235	0.980885	1.00801	1.06302	0.481807	0.955682	0.952889	1.00296	0.924325
PANC1	0	Dem	0.979399	1.07442	0.963815	1.0194	1.01582	1.04504	0.418579	1.01618	0.978171	1.00507	1.01287
MIA	0	Noc	0.823715	0.990955	1.0532	0.930645	1.0548	1.02547	0.99485	0.866792	1.03628	1.00601	0.977487
PANC1	0	Noc	0.861886	1.21248	0.965661	0.98668	1.04366	0.998007	1.02611	0.940911	1.12187	1.0063	0.958037
MIA	0	Dem	0.875692	1.22318	1.21465	0.900893	1.01097	1.30159	0.494103	0.931773	0.89539	1.00536	0.928124
PANC1	0	Dem	0.976222	1.27507	1.09791	0.988642	0.993229	1.11366	0.381001	1.01431	0.942572	1.00286	0.974059
MIA	0	Dem	0.759223	1.36704	1.33664	0.976883	1.00885	1.22408	0.482935	0.966784	0.938359	1.00842	0.925962
PANC1	0	Dem	0.981092	0.927654	0.876186	0.983145	1.02308	0.979346	0.3971	0.9997	0.980409	1.00726	1.0515
MIA	0	Noc	0.796879	1.04181	1.11327	0.901527	1.05514	1.11115	0.901385	0.858685	1.00833	1.00291	0.990202
PANC1	0	Noc	0.903786	1.48202	1.08485	1.01057	1.05613	1.03154	0.975404	0.912948	1.06481	1.0051	0.95846
MIA	0	Dem	0.812318	1.21394	1.21878	0.922953	1.00856	0.984914	0.636993	0.92581	0.843334	0.999516	0.896863
PANC1	0	Dem	0.950738	1.20057	1.11256	0.990834	0.995565	1.03329	0.427499	1.01564	0.891425	1.01019	0.968172
MIA	0.01	Dem	0.882338	1.25265	1.27961	0.943474	1.01444	1.20354	0.505566	0.945191	0.974377	1.00733	0.91826
PANC1	0.01	Dem	0.988845	1.05113	0.917808	1.01708	1.02018	1.02643	0.377568	1.01529	0.975063	1.00692	1.03322
MIA	0.01	Noc	0.95148	1.23378	1.08808	0.919024	1.05171	1.16767	0.876924	0.863417	1.00829	1.00687	0.989303
PANC1	0.01	Noc	0.913685	1.32722	0.982382	1.0236	1.04554	0.980661	0.893195	0.944046	1.07573	1.00941	0.958977
MIA	0.01	Dem	1.00155	1.21187	1.21984	0.931414	1.01257	1.32347	0.472729	0.907033	0.91422	1.00715	0.924604
PANC1	0.01	Dem	0.992126	1.3471	1.15971	0.992403	0.997002	1.07311	0.43539	1.02137	0.893789	1.0029	0.960588
MIA	0.01	Dem	1.14807	1.57922	1.35964	0.947565	1.02054	1.21633	0.583474	0.93984	0.934452	1.00418	0.911281
PANC1	0.01	Dem	0.946372	1.05293	0.912265	0.972134	1.02311	0.928474	0.453964	1.00955	0.979749	1.00777	1.00829
MIA	0.01	Noc	0.933991	0.968277	1.09611	0.862041	1.07003	1.00251	0.980631	0.831889	0.997217	1.00815	0.959992
PANC1	0.01	Noc	0.925826	1.28403	1.0329	0.994458	1.06137	0.934135	0.919495	0.913106	1.08174	1.00742	0.938244
MIA	0.01	Dem	1.01172	1.15174	1.24225	0.914923	1.01684	1.27579	0.56511	0.921211	0.893266	1.00531	0.891795
PANC1	0.01	Dem	1.03559	1.33694	1.1448	0.96741	0.997062	1.15305	0.442853	1.00348	0.904171	1.0103	0.958608
MIA	0.1	Defactinib	2.04314	0.905969	0.975808	1.04383	1.00205	1.08459	1.03238	1.00387	1.0017	0.998497	1.01414
PANC1	0.1	Defactinib	0.914723	0.73011	0.873149	0.98678	0.957994	0.949489	1.05464	1.05298	1.07477	1.00055	0.924546
MIA	0.1	Dem	1.06409	1.10142	1.26938	0.956944	1.013	1.20105	0.471795	0.902668	0.942478	1.01147	0.915347
PANC1	0.1	Dem	1.00683	0.965407	1.08442	1.04228	0.998443	1.07746	0.316125	0.987992	0.905312	1.00879	1.04567
MIA	0.1	Defactinib	1.11854	1.19896	1.03651	1.06224	1.00161	1.12788	1.09826	1.02429	0.986985	0.999582	0.996975
PANC1	0.1	Defactinib	0.928185	1.24037	0.950558	1.06211	0.988394	0.87438	1.00429	1.06118	1.09163	0.997269	1.02954
MIA	0.1	Defactinib	1.93356	1.08349	0.970648	1.09772	0.990838	1.11269	1.24204	1.04118	1.01507	0.997113	0.994564
PANC1	0.1	Defactinib	0.896911	0.817259	0.854493	1.00956	0.957877	0.902771	1.14443	1.06298	1.07479	0.998939	0.913422
MIA	0.1	Dem	1.07378	1.19657	1.2852	0.96253	1.01128	1.10311	0.516487	0.938341	0.911781	1.00411	0.915154
PANC1	0.1	Dem	0.984576	0.987107	1.0575	1.03179	0.984199	1.01363	0.35412	1.00354	0.915795	1.00747	1.03234
MIA	0.1	Defactinib	1.09181	1.10342	0.999695	1.1158	0.980826	1.03477	1.10401	1.08796	1.03237	0.997132	1.01843
PANC1	0.1	Defactinib	0.924372	1.32088	0.965027	1.07432	0.987163	0.950546	1.02464	1.04561	1.06988	0.996155	1.02175
MIA	10	Defactinib	1.96869	1.07877	1.01264	1.15292	0.973658	1.08679	1.1588	1.0661	1.00899	0.996227	1.02525
PANC1	10	Defactinib	1.05683	1.37618	0.894708	1.00441	0.955211	1.06603	1.12619	1.05076	1.07021	0.998893	0.902093
MIA	10	Dem	1.13754	1.1258	1.18122	1.0198	1.00537	1.21347	0.438343	0.942859	0.955698	1.00785	0.921001
PANC1	10	Dem	1.0398	0.972988	1.06805	0.992601	0.986114	1.02384	0.337199	1.02304	0.904394	1.00997	1.03138
MIA	10	Defactinib	1.23414	1.24358	1.00572	1.10196	0.98513	1.26549	0.870465	1.05235	1.03333	1.00279	1.0364
PANC1	10	Defactinib	1.01779	1.42953	0.945753	1.11185	1.00381	0.992294	0.867233	0.99777	1.03188	0.997968	1.0043
MIA	10	Defactinib	2.00264	1.02225	0.930497	1.10636	0.970346	1.12195	0.926315	1.04987	1.02448	0.996039	1.02142
PANC1	10	Defactinib	1.03572	1.15716	0.880015	1.0171	0.957917	0.961035	1.08836	1.05571	1.07959	0.995565	0.897293
MIA	10	Dem	1.13931	1.03126	1.19644	0.960199	1.01669	1.26827	0.367049	0.912813	0.976029	1.00766	0.920212
PANC1	10	Dem	1.03074	0.963841	1.04221	1.04597	0.981993	1.03918	0.313149	1.01958	0.900388	1.00863	1.04153
MIA	10	Defactinib	1.25834	1.32978	0.992286	1.03017	0.984729	1.24524	0.820787	1.05341	1.02999	0.998049	1.03171
PANC1	10	Defactinib	0.951162	1.0954	0.978093	1.08263	0.989456	0.787974	0.995812	1.04242	1.08131	0.993039	1.00956
MIA	0	Defactinib	1.365	0.62007	1.02822	1.0264	1.01348	0.956864	1.28015	0.988875	1.02896	0.998126	0.972347
PANC1	0	Defactinib	0.845239	0.70358	0.899734	1.04937	0.953638	0.865167	1.08867	1.0809	1.12677	0.99841	0.899377
MIA	0	Dem	0.797553	1.02451	1.22077	0.984551	1.00539	1.24743	0.403321	0.936829	0.942827	1.01011	0.949417
PANC1	0	Dem	0.905954	0.947323	1.019	1.0402	0.997643	1.0531	0.318125	1.00361	0.91746	1.00691	1.01796
MIA	0	Defactinib	0.819201	0.994309	1.04722	1.05969	1.00073	0.966337	1.14751	1.03043	0.979747	0.997677	0.982799
PANC1	0	Defactinib	0.845851	1.1092	0.995652	1.08437	0.986669	0.881639	1.05963	1.05203	1.09985	0.993642	1.01703
MIA	0	Defactinib	1.4599	0.755024	1.00892	1.07331	1.00555	1.08448	1.04782	1.00202	1.00625	1.00122	1.01472
PANC1	0	Defactinib	0.842695	0.792617	0.903117	1.00501	0.957458	0.947503	1.05467	1.06475	1.08766	0.999177	0.925425
MIA	0	Dem	0.829557	1.12448	1.25494	0.959913	0.999129	1.22431	0.402171	0.922562	0.945219	1.01	0.950818
PANC1	0	Dem	0.914706	1.12009	1.02513	1.04341	0.98245	1.06154	0.366675	1.03004	0.928948	1.0083	1.00493
MIA	0	Defactinib	0.851718	0.885989	1.08519	1.04488	1.00584	0.924857	1.3113	1.01045	0.959075	1.00436	0.978664
PANC1	0	Defactinib	0.824928	1.24894	0.985314	1.08766	0.979342	0.857127	1.06311	1.07954	1.07336	0.993075	1.00921
MIA	0.01	Defactinib	1.67514	0.797161	0.894447	1.09374	0.987542	1.03134	0.971476	1.0137	1.0148	0.997638	1.02354
PANC1	0.01	Defactinib	0.834619	0.655113	0.864356	0.944784	0.95878	0.898386	0.97219	1.05637	1.10193	0.989952	0.874403
MIA	0.01	Dem	0.921415	1.18427	1.21903	0.97887	1.0063	1.22655	0.424821	0.930623	0.927764	1.00877	0.941373
PANC1	0.01	Dem	0.959096	1.02547	1.03312	1.03391	0.98365	1.04442	0.340752	1.01893	0.928481	1.00495	1.03393
MIA	0.01	Defactinib	0.982206	1.12961	1.04323	1.0408	0.994478	1.05658	1.20217	1.06798	1.00392	0.994757	1.01154
PANC1	0.01	Defactinib	0.837986	0.911088	0.950625	1.14182	0.993053	0.675144	0.928567	1.02407	1.11799	1.00326	1.00344
MIA	0.01	Defactinib	1.729	1.04587	0.985578	1.10312	0.994678	1.08704	0.994761	1.02467	0.995113	0.998715	1.04069
PANC1	0.01	Defactinib	0.854745	0.716673	0.864878	0.971813	0.960373	0.926241	1.12866	1.05429	1.09975	0.997718	0.907551
MIA	0.01	Dem	0.956866	1.04323	1.18319	0.944861	1.0234	1.20016	0.30947	0.896786	0.962678	1.00624	0.944811
PANC1	0.01	Dem	1.00533	1.12923	1.08993	1.00194	0.998018	1.05932	0.328874	1.00825	0.924175	1.00716	1.04814
MIA	0.01	Defactinib	1.04897	1.31408	0.990674	1.01311	0.992487	1.19881	0.824462	1.05766	0.982894	0.997276	1.02567
PANC1	0.01	Defactinib	0.903516	1.16899	0.952514	1.01114	0.979249	0.919535	1.00996	1.07877	1.06385	0.993781	1.0055
MIA	0.1	PF228	1.8977	0.97719	0.924571	1.08886	0.973124	1.09731	1.00827	1.05439	1.0349	1.00342	0.981853
PANC1	0.1	PF228	0.945003	0.949167	0.919175	1.11091	0.964874	0.835252	0.934003	1.03036	1.02383	1.00432	0.998363
MIA	0.1	Defactinib	1.07139	1.42025	0.945679	1.12772	0.964819	1.09431	1.06871	1.07561	1.04961	0.993716	1.01399
PANC1	0.1	Defactinib	0.845517	1.29665	1.00467	1.20999	0.971267	0.849819	1.06329	1.09273	1.15172	1.00403	1.02176
MIA	0.1	PF228	1.0637	0.699946	1.00641	1.21266	0.953042	0.819715	1.27747	1.15204	1.02606	1.00124	1.00573
PANC1	0.1	PF228	0.948189	1.07761	0.943897	1.18434	0.972723	0.777376	0.828463	1.0667	1.06165	0.998701	1.02955
MIA	0.1	PF228	1.8947	0.831899	0.938202	1.17218	0.963109	1.03039	1.00489	1.09001	1.02743	1.00671	1.00367
PANC1	0.1	PF228	0.944066	1.12318	0.974284	1.14977	0.964666	0.839471	0.97751	1.05629	1.01738	1.0039	0.993881
MIA	0.1	Defactinib	1.06017	1.15685	0.939831	1.11931	0.959542	1.01124	1.29002	1.09225	1.06085	0.995163	0.995096
PANC1	0.1	Defactinib	0.850861	1.33529	0.961227	1.23964	0.974081	0.832163	1.02772	1.0856	1.10971	1.00413	1.02326
MIA	0.1	PF228	1.11358	0.785706	1.00261	1.15036	0.955476	0.86038	1.42712	1.16797	1.0233	0.995901	0.978269
PANC1	0.1	PF228	0.975836	1.16381	0.9556	1.14823	0.969793	0.852882	0.854727	1.09707	1.02905	0.998855	1.03443
MIA	10	PF228	2.06929	1.01339	0.953654	1.15615	0.958701	1.10567	1.03265	1.11061	1.02464	1.00284	0.977853
PANC1	10	PF228	1.14781	1.02855	0.911426	1.04639	0.967141	0.853737	0.958675	1.01936	1.02728	1.00083	0.956735
MIA	10	Defactinib	1.10541	1.12159	0.840791	1.15597	0.938653	1.05376	0.910918	1.09667	1.08657	0.996275	0.992476
PANC1	10	Defactinib	1.05956	1.30733	0.88219	1.25256	0.969913	0.856163	0.887702	1.08861	1.11081	0.998705	0.996162
MIA	10	PF228	1.21984	1.17867	0.940952	1.20326	0.946334	1.14768	1.00553	1.16412	1.06407	0.992805	1.02895
PANC1	10	PF228	1.05652	0.910797	0.930629	1.30448	0.981205	0.70054	0.741049	1.02799	1.05015	1.00412	1.03561
MIA	10	PF228	2.01737	1.01982	0.895609	1.18137	0.952988	1.04166	0.966726	1.11601	1.02644	1.0048	0.994848
PANC1	10	PF228	1.12429	1.15389	0.944725	1.16315	0.962956	0.801466	0.946739	1.04449	1.01464	1.00514	0.980622
MIA	10	Defactinib	1.06191	1.01366	0.922325	1.20213	0.935267	0.905971	1.05971	1.1366	1.06849	0.997284	1.02286
PANC1	10	Defactinib	0.993183	1.29789	0.941307	1.22745	0.977472	0.844073	1.01223	1.06819	1.10887	0.999924	0.995184
MIA	10	PF228	1.07691	0.68261	1.01224	1.19881	0.94598	0.823524	1.27774	1.17492	1.06058	0.999244	0.999615
PANC1	10	PF228	1.04206	1.20643	0.944982	1.16964	0.980177	0.772215	0.831763	1.06386	1.05273	0.993018	1.02051
MIA	0	PF228	1.42497	0.832315	0.879361	1.08757	0.968173	1.05006	1.004	1.06192	1.02722	1.004	0.964266
PANC1	0	PF228	0.892964	1.00082	0.955986	1.12135	0.96369	0.893401	0.926583	1.04594	1.04139	1.00099	0.984211
MIA	0	Defactinib	0.779113	1.25597	0.920004	1.10278	0.967255	0.955381	1.1255	1.05439	1.04016	0.999181	1.00175
PANC1	0	Defactinib	0.842522	1.32395	0.935816	1.18513	0.965455	0.84952	1.02337	1.09126	1.1477	0.998953	1.01462
MIA	0	PF228	0.779141	0.744279	0.93133	1.16726	0.956833	0.81102	1.34094	1.1179	1.0611	0.994874	0.989491
PANC1	0	PF228	0.834277	1.06169	0.909235	1.15005	0.96744	0.774463	0.822711	1.05926	1.068	0.997511	1.02032
MIA	0	PF228	1.36705	0.856317	0.901926	1.12375	0.968552	1.02879	1.14266	1.06443	1.03787	1.0058	0.986275
PANC1	0	PF228	0.868994	0.993878	0.945619	1.10412	0.963136	0.921395	0.834661	1.05656	1.02605	1.00122	0.998799
MIA	0	Defactinib	0.770271	1.46149	0.920726	1.09703	0.954588	1.02465	0.906012	1.11227	1.03025	0.994867	1.04215
PANC1	0	Defactinib	0.804929	1.40922	0.997072	1.20099	0.971968	0.93675	0.91161	1.08466	1.09371	1.00026	1.04258
MIA	0	PF228	0.768336	0.647978	0.944148	1.20095	0.951165	0.715485	1.35602	1.12383	1.05716	0.996007	0.990209
PANC1	0	PF228	0.861849	0.934924	0.918234	1.22447	0.962786	0.752596	0.789435	1.08706	1.08515	1.00054	1.00353
MIA	0.01	PF228	1.51631	0.883787	0.923993	1.15778	0.950404	0.991953	1.13638	1.12468	1.01277	1.00228	0.993331
PANC1	0.01	PF228	0.944856	0.758154	0.890918	0.958744	0.957767	0.901889	1.02891	1.03287	1.05232	0.997034	0.931063
MIA	0.01	Defactinib	0.876171	1.1127	0.925828	1.11705	0.966263	0.959505	1.3304	1.09166	1.0457	0.993725	0.989529
PANC1	0.01	Defactinib	0.816353	1.39704	0.989787	1.18841	0.963134	0.921801	1.05778	1.09138	1.09232	0.997712	1.02696
MIA	0.01	PF228	0.930102	0.800935	0.882077	1.09212	0.961395	0.886058	1.41776	1.10853	1.07839	0.999836	0.955757
PANC1	0.01	PF228	0.91974	1.18068	0.971554	1.13691	0.969638	0.831339	0.875031	1.06876	1.03805	0.998235	1.04006
MIA	0.01	PF228	1.6173	0.95862	0.931565	1.10299	0.971038	1.04642	1.11056	1.07082	1.02025	1.00211	0.999861
PANC1	0.01	PF228	0.8999	0.768671	0.907309	1.04654	0.962395	0.863156	0.940437	1.0373	1.03734	1.00389	0.965684
MIA	0.01	Defactinib	0.942291	1.41345	0.939712	1.09971	0.976299	1.01724	1.14137	1.06588	1.03016	0.992081	0.994622
PANC1	0.01	Defactinib	0.826271	1.33835	0.944564	1.19492	0.962175	0.924041	0.865407	1.08903	1.12103	1.00115	1.03326
MIA	0.01	PF228	0.916389	0.835718	0.955864	1.16123	0.952647	0.839146	1.33452	1.13923	1.03088	0.998223	0.981753
PANC1	0.01	PF228	0.876245	0.952122	0.942364	1.16461	0.955611	0.719409	0.834686	1.09871	1.10037	0.997183	1.03214
MIA	0.1	PF228	1.04877	1.09062	0.910255	1.15723	0.939352	0.947434	0.987956	1.13533	1.06067	1.00022	1.01172
PANC1	0.1	PF228	1.00013	1.13958	0.924968	1.16609	0.973921	0.80724	0.962078	1.02281	1.11028	0.997857	1.00151
MIA	0.1	PF228	0.919221	0.513525	0.930393	1.19003	0.942454	0.585719	1.44463	1.14213	1.0464	1.00013	0.958123
PANC1	0.1	PF228	0.953806	0.943112	0.948769	1.1455	0.978236	0.756365	0.976756	1.0526	1.1036	1.00218	1.00221
MIA	10	PF228	0.997949	0.530383	0.95228	1.26004	0.927081	0.6288	1.52957	1.20969	1.074	0.99947	0.987668
PANC1	10	PF228	1.18918	1.27255	0.913773	1.17047	0.981924	0.832212	0.967724	1.03871	1.1159	1.00344	0.991004
MIA	10	PF228	1.01602	0.833147	0.91288	1.23303	0.931998	0.777787	1.27842	1.18496	1.06693	0.9998	0.986052
PANC1	10	PF228	1.19208	1.0749	0.940545	1.12378	0.982811	0.844389	0.988437	1.03592	1.07747	1.00368	0.98761
MIA	0	PF228	0.755327	1.20594	0.852719	1.21459	0.915342	0.938053	0.835074	1.19411	1.07474	0.994011	1.03727
PANC1	0	PF228	0.873746	1.05962	0.897097	1.13461	0.982767	0.828	1.02919	1.01839	1.15543	1.00186	0.988411
MIA	0	PF228	0.756525	0.437141	1.00406	1.27222	0.940475	0.490601	1.37559	1.14314	1.0271	0.998523	0.995675
PANC1	0	PF228	0.897497	1.17394	0.963681	1.22611	0.978761	0.839214	1.02357	1.04071	1.10355	1.00156	1.00813
MIA	0.01	PF228	0.816111	0.512132	0.905001	1.26834	0.925626	0.574704	1.54346	1.15312	1.0414	0.992552	1.00602
PANC1	0.01	PF228	0.922787	0.920962	0.9257	1.16112	0.969223	0.795558	0.973953	1.07583	1.08851	1.0016	1.01198
MIA	0.01	PF228	0.949294	0.912264	0.988429	0.999646	0.991432	0.909908	1.40459	1.07832	1.04815	1.00183	0.980367
PANC1	0.01	PF228	0.981818	0.889586	0.934265	1.13865	0.985153	0.825689	0.949558	1.04555	1.08768	0.995665	0.995182

## Sheet: Fig2 F arc strengths
From	To	Strength	Abs	Log2	Abs_rounded	Category
Cell Roundness	Elongatedness	-535.78	535.78	9.0655	536	None
Cell Area	Membrane/Cytoplasm Actin	-265.595	265.595	8.05308	266	None
Elongatedness	Cell Area	-215.224	215.224	7.74969	215	None
Membrane/Cytoplasm Actin	Cytoplasm Actin Mean	-44.5455	44.5455	5.47721	45	None
Actin Filament/Cell Area	Actin Texture (Bright)	-221.645	221.645	7.79211	222	None
Membrane/Cytoplasm Actin	Actin Texture (Bright)	-215.298	215.298	7.75019	215	None
Cell Roundness	Tubulin Texture (Ridge)	-75.6745	75.6745	6.24174	76	None
Actin Filament/Cell Area	Nucleus Roundness	-61.0353	61.0353	5.93157	61	None
Tubulin Texture (Ridge)	Cytoplasm Tubulin Mean	-112.593	112.593	6.81498	113	None
Nucleus Roundness	Cytoplasm Tubulin Mean	-94.2076	94.2076	6.55777	94	None
Cytoplasm Actin Mean	Nuc RELA Mean	-31.0398	31.0398	4.95605	31	RELA dependent on Feature
Cell Area	Cytoplasm Actin Mean	-26.0713	26.0713	4.70439	26	None
Membrane/Cytoplasm Actin	Actin Filament/Cell Area	-23.352	23.352	4.54547	23	None
Cell Roundness	Nucleus Roundness	-13.4999	13.4999	3.75487	13	None

## Sheet: Fig2 F well and cell frequency
Treatment	TNF_ngml	Cell line	number_wells_rep1	number_wells_rep2	number_wells_rep3	total_wells	number_cells_rep1	number_cells_rep2	number_cells_rep3	total_cells
Blebb	0	MIA PaCa2	4	4	4	12	6842	3284	2796	12922
CK666	0	MIA PaCa2	4	4	4	12	6526	4304	2798	13628
Control	0	MIA PaCa2	4	4	4	12	7051	7643	5836	20530
Cyto D	0	MIA PaCa2	4	4	4	12	7735	3180	2799	13714
Defactinib	0	MIA PaCa2	4	4	4	12	7392	3355	2834	13581
Dem	0	MIA PaCa2	4	4	4	12	5564	3743	2559	11866
H1152	0	MIA PaCa2	4	4	4	12	7652	4061	2859	14572
Noc	0	MIA PaCa2	4	4	4	12	5930	3347	2610	11887
PF228	0	MIA PaCa2	4	4	4	12	7003	3167	2819	12989
PTX	0	MIA PaCa2	4	4	4	12	6552	3762	2663	12977
SMIFH2	0	MIA PaCa2	4	4	4	12	5696	3175	2569	11440
Vinblastine	0	MIA PaCa2	4	4	4	12	7378	2427	2741	12546
Blebb	0.01	MIA PaCa2	4	4	4	12	6345	3160	2520	12025
CK666	0.01	MIA PaCa2	4	4	4	12	6537	4005	2753	13295
Control	0.01	MIA PaCa2	4	4	4	12	6039	7442	5639	19120
Cyto D	0.01	MIA PaCa2	4	4	4	12	6660	2610	2713	11983
Defactinib	0.01	MIA PaCa2	4	4	4	12	7239	2992	2708	12939
Dem	0.01	MIA PaCa2	4	4	4	12	5756	3766	2764	12286
H1152	0.01	MIA PaCa2	4	4	4	12	7945	3937	2786	14668
Noc	0.01	MIA PaCa2	4	4	4	12	6035	2676	2498	11209
PF228	0.01	MIA PaCa2	4	4	4	12	7221	3565	2899	13685
PTX	0.01	MIA PaCa2	4	4	4	12	6608	3917	2731	13256
SMIFH2	0.01	MIA PaCa2	4	4	4	12	6016	3543	2534	12093
Vinblastine	0.01	MIA PaCa2	4	4	4	12	7641	2564	2759	12964
Blebb	0.1	MIA PaCa2	4	4	4	12	5977	2562	2513	11052
CK666	0.1	MIA PaCa2	4	4	4	12	5203	3123	2863	11189
Control	0.1	MIA PaCa2	4	4	4	12	5682	7116	5687	18485
Cyto D	0.1	MIA PaCa2	4	4	4	12	5713	2071	2513	10297
Defactinib	0.1	MIA PaCa2	4	4	4	12	6718	2767	2561	12046
Dem	0.1	MIA PaCa2	4	4	4	12	5090	2937	2707	10734
H1152	0.1	MIA PaCa2	4	4	4	12	6756	3829	2804	13389
Noc	0.1	MIA PaCa2	4	4	4	12	5735	2202	2503	10440
PF228	0.1	MIA PaCa2	4	4	4	12	7211	3772	2850	13833
PTX	0.1	MIA PaCa2	4	4	4	12	6351	3492	2851	12694
SMIFH2	0.1	MIA PaCa2	4	4	4	12	5217	3168	2663	11048
Vinblastine	0.1	MIA PaCa2	4	4	4	12	7216	2414	2530	12160
Blebb	10	MIA PaCa2	4	4	4	12	6187	2687	2710	11584
CK666	10	MIA PaCa2	4	4	4	12	6495	3038	2765	12298
Control	10	MIA PaCa2	4	4	4	12	6099	7059	6033	19191
Cyto D	10	MIA PaCa2	4	4	4	12	5136	1769	2895	9800
Defactinib	10	MIA PaCa2	4	4	4	12	6331	3464	2841	12636
Dem	10	MIA PaCa2	4	4	4	12	5397	3034	2573	11004
H1152	10	MIA PaCa2	4	4	4	12	8182	3605	2980	14767
Noc	10	MIA PaCa2	4	4	4	12	5368	2404	2767	10539
PF228	10	MIA PaCa2	4	4	4	12	7628	3365	2681	13674
PTX	10	MIA PaCa2	4	4	4	12	7251	3198	2551	13000
SMIFH2	10	MIA PaCa2	4	4	4	12	6360	2870	2317	11547
Vinblastine	10	MIA PaCa2	4	4	4	12	6062	3303	2541	11906
Blebb	0	PANC1	4	4	4	12	8197	2268	1610	12075
CK666	0	PANC1	4	4	4	12	8311	2756	2234	13301
Control	0	PANC1	4	4	4	12	6973	4960	4113	16046
Cyto D	0	PANC1	4	4	4	12	8103	2223	1642	11968
Defactinib	0	PANC1	4	4	4	12	7741	2057	1876	11674
Dem	0	PANC1	4	4	4	12	7144	2504	1907	11555
H1152	0	PANC1	4	4	4	12	8992	2793	2298	14083
Noc	0	PANC1	4	4	4	12	7182	1902	1738	10822
PF228	0	PANC1	4	4	4	12	6693	2305	2037	11035
PTX	0	PANC1	4	4	4	12	7269	2651	2039	11959
SMIFH2	0	PANC1	4	4	4	12	7690	2526	2069	12285
Vinblastine	0	PANC1	4	4	4	12	6662	2080	1583	10325
Blebb	0.01	PANC1	4	4	4	12	8537	1938	1913	12388
CK666	0.01	PANC1	4	4	4	12	7284	2758	1713	11755
Control	0.01	PANC1	4	4	4	12	7148	5051	3772	15971
Cyto D	0.01	PANC1	4	4	4	12	8368	2205	2038	12611
Defactinib	0.01	PANC1	4	4	4	12	7893	1984	1999	11876
Dem	0.01	PANC1	4	4	4	12	7007	2623	1827	11457
H1152	0.01	PANC1	4	4	4	12	8495	3041	1910	13446
Noc	0.01	PANC1	4	4	4	12	7151	2005	1839	10995
PF228	0.01	PANC1	4	4	4	12	7517	2316	1924	11757
PTX	0.01	PANC1	4	4	4	12	7961	2686	1773	12420
SMIFH2	0.01	PANC1	4	4	4	12	7342	2738	1855	11935
Vinblastine	0.01	PANC1	4	4	4	12	7029	1987	1766	10782
Blebb	0.1	PANC1	4	4	4	12	8304	1927	1856	12087
CK666	0.1	PANC1	4	4	4	12	6576	2683	1855	11114
Control	0.1	PANC1	4	4	4	12	7306	4125	4231	15662
Cyto D	0.1	PANC1	4	4	4	12	8242	1726	2124	12092
Defactinib	0.1	PANC1	4	4	4	12	7995	1845	1917	11757
Dem	0.1	PANC1	4	4	4	12	6833	2545	1845	11223
H1152	0.1	PANC1	4	4	4	12	7649	2816	1976	12441
Noc	0.1	PANC1	4	4	4	12	7024	1941	1564	10529
PF228	0.1	PANC1	4	4	4	12	6547	2371	1830	10748
PTX	0.1	PANC1	4	4	4	12	7169	2594	1745	11508
SMIFH2	0.1	PANC1	4	4	4	12	7046	2572	1834	11452
Vinblastine	0.1	PANC1	4	4	4	12	6869	1840	1572	10281
Blebb	10	PANC1	4	4	4	12	7830	1808	2190	11828
CK666	10	PANC1	4	4	4	12	7216	2398	1588	11202
Control	10	PANC1	4	4	4	12	6825	5180	4206	16211
Cyto D	10	PANC1	4	4	4	12	7864	1957	2324	12145
Defactinib	10	PANC1	4	4	4	12	7717	1996	2457	12170
Dem	10	PANC1	4	4	4	12	6526	2175	1708	10409
H1152	10	PANC1	4	4	4	12	7618	2556	1730	11904
Noc	10	PANC1	4	4	4	12	7091	1889	1730	10710
PF228	10	PANC1	4	4	4	12	6714	2237	1630	10581
PTX	10	PANC1	4	4	4	12	6760	2327	1582	10669
SMIFH2	10	PANC1	4	4	4	12	6699	2430	1654	10783
Vinblastine	10	PANC1	4	4	4	12	6655	1667	1774	10096

## Sheet: Fig2Supp1 B
Bio_rep	Cell_line	Treatment	Actin Filament/Cell Area	Elongatedness	Membrane/Cytoplasm Actin	Ring/Cytoplasm Tubulin	Ring Tubulin StdDev	Ring Tubulin Mean	Ring Actin StdDev	Ring Actin Mean	Membrane/Cell Area	Tubulin - Cytoplasm SER Bright 4 px	Tubulin - Cytoplasm SER Ridge 4 px	Tubulin - Cytoplasm SER Valley 0 px	Tubulin - Cytoplasm SER Ridge 0 px	Actin - Cell SER Bright 4 px	Actin - Cell SER Ridge 4 px	Actin - Cell SER Valley 0 px	Actin - Cell SER Ridge 0 px	Membrane Actin StdDev	Cytoplasm Actin StdDev	Cytoplasm Actin Mean	Cytoplasm Tubulin StdDev	Cytoplasm Tubulin Mean	Cell Ratio Width to Length	Cell Length	Cell Width	Cell Roundness	Cell Area	Nuc Hoechst Mean	Neighbour Contact	Nucleus Ratio Width to Length	Nucleus Length	Nucleus Width	Nucleus Roundness	Nucleus Area
1	Capan1	Control	0	7.48718	0.851831	0.933258	61.2736	141.571	58.2405	205.637	0.124359	0.000358085	0.000412899	0.131953	0.0526739	0.00564302	0.00423161	0.0653787	0.0445066	54.4101	67.4139	178.415	80.8413	151.696	0.612652	24.6798	15.1201	0.867539	325.406	158.072	100	0.70473	15.7684	11.1125	0.842465	163.537
1	Capan1	Control	0.075188	12.1031	0.818909	1.4304	247.142	642.943	72.2847	91.3563	0.307734	0.0120159	0.0102463	0.161493	0.0869501	0.0103586	0.00853807	0.113784	0.0713694	51.1104	53.0999	70.9453	236.747	449.486	0.466103	48.4812	22.5973	0.773535	776.802	179.79	0	0.593575	20.0645	11.9098	0.912023	212.348
1	Capan1	Control	0.00683994	12.2754	0.937492	1.17161	75.3232	256.247	26.6231	56.8158	0.334701	0.0103543	0.00840724	0.203032	0.10172	0.00869033	0.00749649	0.121773	0.0825337	41.1371	32.2174	64.9481	96.0095	218.714	0.390831	52.9874	20.7091	0.625065	914.891	187.343	13.4529	0.725734	15.3121	11.1125	0.960991	151.856
1	Capan1	Control	0.0142157	17.2941	1.07783	0.940567	105.268	272.992	31.2059	53.9789	0.369608	0.014084	0.0129135	0.235375	0.109626	0.00936489	0.00892303	0.149113	0.0718158	52.4574	41.7411	60.9558	155.599	290.242	0.340734	60.6596	20.6688	0.585255	851.061	179.916	15.859	0.6936	17.5704	12.1868	0.98978	180.225
1	Capan1	Control	0	7.06677	1.15128	1.1333	26.7789	136.021	17.4589	85.7969	0.270228	0.00187951	0.00156252	0.0847472	0.0566421	0.00119771	0.00107129	0.0760676	0.0562102	27.0819	24.0107	99.2273	34.1791	120.022	0.660113	30.6309	20.2199	0.825562	531.079	139.725	84.2105	0.810998	15.7684	12.7882	0.945272	176.887
1	Capan1	Control	0	13.0311	1.06894	1.18023	48.313	173.188	29.2564	113.018	0.274167	0.00235734	0.00173389	0.086841	0.0617871	0.00296796	0.0023628	0.074203	0.053612	41.8256	42.4193	136.668	55.5208	146.741	0.40284	49.8851	20.0957	0.672988	763.869	82.3911	90.5759	0.827281	18.9965	15.7154	0.855576	253.232
1	Capan1	Control	0	7.91215	1.01758	0.989802	59.9725	135.604	25.9608	68.2964	0.260507	0.00455814	0.00396627	0.11099	0.0671592	0.00363177	0.00346038	0.0781738	0.0502845	45.5119	36.6295	79.672	51.9199	137.001	0.607508	46.6839	28.3608	0.807106	1101.79	83.2541	70.0508	0.779146	20.0333	15.6089	0.912317	263.662
1	Capan1	Control	0.0140093	8.53903	1.02479	1.21575	58.2409	170.216	30.9986	122.305	0.242829	0.00408606	0.0033669	0.0784301	0.0576647	0.00263331	0.00239391	0.0487163	0.0370399	36.3862	35.2798	131.563	57.0944	140.009	0.565685	36.5376	20.6688	0.723791	625.363	90.1806	83.9506	0.77659	17.9927	13.973	0.947597	220.692
1	Capan1	Control	0	7.87749	1.11216	1.04079	51.5958	128.628	39.4916	95.5	0.222998	0.00343464	0.00295789	0.101082	0.0725905	0.00369292	0.00339175	0.0739206	0.0530162	33.7828	39.0437	107.222	43.717	123.587	0.561619	39.1023	21.9606	0.719236	776.385	75.8673	80.7692	0.842363	16.3018	13.732	0.932056	193.157
1	Capan1	Control	0	8.9308	1.02356	1.06689	44.8791	141.117	41.5904	162.121	0.214533	0.00441373	0.00362284	0.0752529	0.0624261	0.00315331	0.00231576	0.0622651	0.0491418	45.8525	40.5924	161.926	40.5551	132.27	0.486947	32.814	15.9787	0.655934	482.268	94.0619	88.3117	0.753346	17.4871	13.1738	0.951099	205.256
1	Capan1	Control	0	8.90909	1.18158	1.18843	37.2552	137.942	35.4554	122.888	0.163009	0.00323291	0.00226773	0.0712632	0.0489534	0.00313776	0.00283445	0.0580559	0.0449186	54.276	46.2168	141.743	41.2862	116.071	0.572659	34.4332	19.7185	0.779102	532.33	110.629	90.7143	0.739629	18.2345	13.4868	0.963701	209.845
1	Capan1	Control	0.00870827	7.55491	1.02675	1.09685	58.3783	171.065	24.4583	65.2407	0.209482	0.00699626	0.00680821	0.11167	0.0712662	0.00364444	0.00328275	0.0875647	0.059197	32.7773	25.4294	68.6821	62.9089	155.959	0.640984	40.3571	25.8683	0.828104	862.325	97.6802	58.2353	0.873128	18.8311	16.4419	1.00388	269.085
1	Capan1	Control	0	12.6527	0.715919	1.05597	83.6789	191.732	29.3954	71.9265	0.347996	0.00959601	0.00830508	0.173279	0.0890803	0.00670604	0.00597503	0.087219	0.0547838	36.9367	33.1915	78.0659	87.774	181.57	0.3226	60.9923	19.6761	0.536448	1176.05	78.6008	35.7639	0.737442	19.269	14.2098	0.964086	239.048
1	Capan1	Control	0	11.1106	1.07497	1.31031	89.0142	202.886	32.3571	87.1365	0.280016	0.00561597	0.00474612	0.113193	0.0779104	0.00428829	0.00369264	0.0721913	0.0482627	52.3595	42.1885	100.448	65.4672	154.838	0.416495	54.1671	22.5603	0.641036	1056.32	71.8641	70.6383	0.753266	18.8643	14.2098	0.956373	247.809
1	Capan1	Control	0	8.14074	0.984801	1.13374	57.2542	175.676	37.7091	96.8912	0.216591	0.00442651	0.00376893	0.10326	0.0742661	0.00435935	0.00382582	0.057737	0.0451859	39.3132	40.8274	115.906	60.7148	154.952	0.584223	51.2871	29.9631	0.772486	1292.44	97.1218	62.6126	0.729689	22.3933	16.3401	0.937624	282.435
1	Capan1	Control	0.0194465	10.9289	0.942131	1.29579	41.1184	172.095	28.0262	94.7232	0.29282	0.00469153	0.0040181	0.121393	0.0777082	0.00394455	0.00356132	0.0716741	0.0513577	41.491	33.4118	105.767	48.2215	132.811	0.460899	55.2084	25.4455	0.630677	1115.56	126.379	66.9388	0.738839	18.8311	13.9131	0.9274	235.293
1	Capan1	Control	0.0182688	8.98652	0.822763	1.14818	56.0804	186.491	50.3029	104.583	0.233145	0.00689722	0.00561006	0.130159	0.0776406	0.00581554	0.00528962	0.0848862	0.061347	47.8605	45.1585	92.2379	65.5104	162.423	0.556576	46.4195	25.836	0.775681	959.112	92.3333	48.4211	0.760627	18.2916	13.9131	0.988468	219.023
1	Capan1	Control	0	14.4739	0.860612	0.97821	90.6272	213.326	33.1376	47.1569	0.338086	0.0100009	0.00882135	0.177838	0.0935702	0.00710374	0.00612095	0.120511	0.0729439	38.0865	38.6662	60.2518	130.028	218.078	0.385964	66.6874	25.7389	0.695146	1229.03	189.246	11.8143	0.883629	16.1475	14.2684	0.984098	200.25
1	Capan1	Control	0	10.7261	0.868369	0.877647	76.8139	187.535	32.3383	92.5134	0.387633	0.00850844	0.00766237	0.176251	0.0848039	0.00532197	0.00475205	0.10225	0.0619156	45.7565	41.4209	77.7142	114.217	213.68	0.464991	58.0089	26.9736	0.606231	1254.9	223.864	44.6097	0.834548	18.8311	15.7154	0.983815	253.65
1	Capan1	Control	0	7.12719	1.01669	1.0208	21.388	83.7595	27.8575	108.679	0.175439	0.00246013	0.00187792	0.0826089	0.0527537	0.00249576	0.00230163	0.0766185	0.0568817	31.5232	28.2497	109.306	22.4447	82.0526	0.646886	26.0371	16.843	0.909327	380.474	67.4423	89.3204	0.723805	15.3529	11.1125	0.869444	158.531
1	Capan1	Control	0.0545905	18.3457	0.738595	0.981709	52.0429	113.403	68.463	145.648	0.153019	0.0158984	0.0143694	0.121967	0.0710781	0.0105038	0.00979613	0.0851878	0.0609607	66.5865	69.2931	161.27	57.3154	115.515	0.324531	48.0968	15.6089	0.679509	504.379	109.179	19.6078	0.406282	27.1662	11.0371	0.831937	274.509
1	Capan1	Control	0.0261484	11.4233	1.00171	1.07291	24.2053	107.451	40.5706	145.393	0.176678	0.00299414	0.00268729	0.0764818	0.0531609	0.00364499	0.00315568	0.0664916	0.0441787	45.4925	40.5434	147.78	32.5749	100.149	0.368253	41.0591	15.1201	0.660275	590.319	98.9446	87.0588	0.553018	23.4756	12.9824	0.889759	270.337
1	Capan1	Control	0	11.9867	0.890656	1.1364	17.5809	81.307	51.6568	110.288	0.302281	0.00366576	0.00303021	0.0938285	0.0659133	0.00442964	0.00392033	0.0745506	0.052417	35.3459	36.7499	98.7453	21.1301	71.548	0.427448	51.2871	21.9226	0.7184	877.761	65.6937	65.9794	0.804984	14.4428	11.6262	0.930325	143.929
1	Capan1	Control	0	13.0381	0.781703	1.12661	47.41	119.194	132.205	199.55	0.20339	0.00887856	0.00731846	0.120132	0.0616219	0.00996124	0.0096572	0.0738383	0.0557555	53.3531	97.4092	171.627	47.798	105.8	0.403108	35.8285	14.4428	0.734855	393.824	117.229	45.2381	0.700696	15.2027	10.6525	0.931555	139.758
1	Capan1	Control	0.00713436	8.6088	0.922854	1.04919	80.6439	153.714	48.97	199.635	0.19025	0.00589248	0.00426083	0.0799691	0.0573638	0.00503843	0.00478222	0.0675842	0.0585639	61.6135	54.9251	190.401	71.1518	146.506	0.550239	27.4792	15.1201	0.857192	350.854	115.294	70.1923	0.567819	12.8695	7.30752	0.871858	88.8608
1	Capan1	Control	0	7.8993	1.17254	1.13309	23.5614	99.0814	24.156	113.006	0.170191	0.00394457	0.00354215	0.0713002	0.0563991	0.00297645	0.00308499	0.0589057	0.0421289	32.1153	36.4541	128.957	24.7598	87.4439	0.614295	28.6025	17.5704	0.834204	414.267	78.4518	85.3448	0.79196	16.1475	12.7882	0.924031	180.225
1	Capan1	Control	0	10.6256	1.05603	1.08928	17.7378	92.9605	33.728	127.702	0.314597	0.00301843	0.00233485	0.0735584	0.0502832	0.00450408	0.00364673	0.0542767	0.0416897	43.9468	35.1327	137.52	19.6314	85.3415	0.485981	34.9622	16.991	0.652329	460.157	67.2376	86.755	0.790569	15.0648	11.9098	0.898681	153.525
1	Capan1	Control	0	10.9417	0.940428	1.10022	33.2741	121.314	37.1119	169.734	0.24375	0.00378833	0.00333144	0.0674344	0.058745	0.00368689	0.00321512	0.0768411	0.047185	46.7705	46.2441	164.037	35.6189	110.263	0.401824	33.0988	13.2999	0.644143	400.499	83.9422	88.0282	0.819878	14.1804	11.6262	0.934932	140.592
1	Capan1	Control	0	8.47085	1.03147	1.00421	21.2246	64.4779	30.3746	98.7301	0.161435	0.00436942	0.00427301	0.0963858	0.059792	0.00391748	0.00323804	0.0726892	0.0499218	33.5809	30.0794	94	23.8599	64.2078	0.599982	28.0725	16.843	0.877946	372.131	64.8476	73.3333	0.738969	15.6356	11.5542	0.887462	159.365
1	Capan1	Control	0	11.4465	1.14693	0.976232	26.5776	86.0329	30.4315	102.498	0.182828	0.00374689	0.00288192	0.0724222	0.0558169	0.00377828	0.00312098	0.0632816	0.0456762	53.28	55.3433	130.038	25.8261	88.1276	0.413332	34.3786	14.2098	0.756373	413.015	67.7551	94.4444	0.788594	14.7429	11.6262	0.946577	148.101
1	Capan1	Control	0.0503664	13.37	0.996953	1.08087	19.1854	94.9842	56.9051	158.589	0.198718	0.00236649	0.00142321	0.0750439	0.0571069	0.00581846	0.00533936	0.0556573	0.0408506	75.4825	81.9182	195.453	28.6658	87.8777	0.398628	39.0222	15.5553	0.658708	455.568	104.997	78.5235	0.770091	16.606	12.7882	0.963845	182.728
1	Capan1	Control	0	12.7964	1.04835	0.921042	33.1384	94.0588	38.528	134.951	0.24924	0.00780577	0.00527234	0.204661	0.0743095	0.00187281	0.00184417	0.0785521	0.058045	31.701	35.6151	147.392	64.7419	102.122	0.351448	29.6341	10.4148	0.56929	274.509	93.9801	87.5969	0.772224	13.4868	10.4148	0.975335	127.659
1	Capan1	Control	0.0213788	7.74171	0.942914	1.16603	20.9537	77.0773	51.0322	117.68	0.274869	0.00529051	0.00424497	0.0870126	0.0710606	0.00708535	0.00641726	0.0904966	0.0665639	66.2188	70.7672	140.702	25.8385	66.1026	0.601321	43.0191	25.8683	0.788618	956.192	132.247	41.7112	0.785399	16.1991	12.7228	0.987049	179.39
1	Capan1	Control	0.0259217	6.2235	0.750787	1.22687	22.199	88.3636	39.5015	109.218	0.240783	0.00298823	0.00213911	0.0922686	0.0707234	0.00541768	0.00501632	0.0782387	0.0545585	47.5655	50.0873	124.434	24.6332	72.0238	0.65534	33.5682	21.9986	0.837338	724.236	105.306	57.7922	0.789844	13.4868	10.6525	0.983029	129.328
1	Capan1	Control	0	12.424	0.994105	1.28664	100.146	207.652	55.4473	208.618	0.262	0.00768208	0.00412432	0.101514	0.0500668	0.00477965	0.00400242	0.066967	0.0498962	59.7212	56.6823	192.332	89.5423	161.391	0.396378	25.4537	10.0893	0.628681	208.593	135.732	89.3204	0.634324	11.8747	7.53242	0.932515	88.0264
1	Capan1	Control	0	12.0455	1.0444	1.02852	13.9315	70.6096	24.3628	113.044	0.273601	0.00194237	0.0016769	0.0801448	0.0588511	0.00293747	0.00285059	0.0604218	0.0440045	41.2649	36.5184	124.534	16.428	68.6514	0.448186	37.9105	16.991	0.711627	477.262	66.4133	88.1119	0.773538	14.2684	11.0371	0.863907	139.758
1	Capan1	Control	0	9.92629	1.08983	0.971781	59.726	160.664	64.4687	187.655	0.184275	0.00584177	0.00528391	0.095749	0.0565284	0.00471103	0.00375738	0.0612477	0.0528066	67.0215	63.396	186.586	62.7743	165.329	0.537688	20.527	11.0371	0.795763	169.795	140.205	96.0526	0.634648	10.9613	6.95656	0.904358	70.9218
1	Capan1	Control	0	9.10145	1.04651	0.968867	26.1083	83.6917	22.5167	159.233	0.16087	0.00170157	0.00145153	0.0836868	0.0623002	0.00244372	0.00230785	0.0678599	0.0450733	30.7859	28.2903	157.753	34.9598	86.381	0.536561	25.5926	13.732	0.845598	287.859	98.0918	87.3684	0.792896	14.5722	11.5542	0.9632	147.684
1	Capan1	Control	0	12.1741	1.17842	1.09865	20.4703	63.8371	22.4484	80.4924	0.169713	0.00352454	0.00296491	0.104195	0.0688889	0.00165098	0.00157339	0.0821072	0.0549179	23.1794	22.7637	81.9565	21.166	58.1052	0.439669	38.1956	16.7934	0.842295	479.348	89.0926	79.8387	0.767195	16.6687	12.7882	0.929171	181.893
1	Capan1	Control	0	8.77994	1.00601	1.03575	20.9759	83.4658	50.4123	143.665	0.162953	0.0016214	0.00151037	0.075958	0.0546438	0.00596001	0.00423189	0.0725946	0.0469471	42.6447	56.9632	151.253	23.1484	80.5847	0.498729	25.6415	12.7882	0.82557	299.54	115.889	91.9192	0.772224	13.4868	10.4148	0.961735	124.739
1	Capan1	Control	0.0295203	11.0062	1.10288	1.04055	27.4751	85.6667	48.7144	152.141	0.161132	0.00277451	0.00185561	0.0913073	0.0573229	0.00234449	0.00186109	0.0793009	0.0514283	51.2698	52.3383	164.781	27.895	82.3279	0.478412	30.5491	14.615	0.812796	339.173	101.972	85.0467	0.696596	15.9526	11.1125	0.967861	158.531
1	Capan1	Control	0.0548446	7.52102	0.92158	1.06985	37.8475	119.584	47.2952	169.018	0.16362	0.00399866	0.00217646	0.0902807	0.0494282	0.00515378	0.00364541	0.0609152	0.047695	42.2504	49.8626	174.203	54.664	111.776	0.580011	29.2943	16.991	0.774496	456.402	150.517	90	0.683486	16.9048	11.5542	0.982294	172.715
1	Capan1	Control	0	9.23117	1.00756	1.02105	18.5134	96.2821	45.9198	178.026	0.124675	0.00399931	0.00322102	0.0813923	0.0661658	0.00218431	0.00176068	0.0544973	0.0426181	42.9911	43.797	182.144	24.1638	94.2973	0.510993	27.2276	13.9131	0.813109	321.234	96.1671	81.7308	0.644517	18.9084	12.1868	0.885674	182.311
1	Capan1	Control	0	7.78531	1.02192	1.02864	14.3372	76.0337	40.1502	147.596	0.122881	0.0028866	0.00268623	0.0850514	0.0515311	0.00368041	0.00392112	0.0618462	0.0446751	46.6976	38.4865	144.297	20.8046	73.917	0.5547	23.9767	13.2999	0.755674	295.368	156.688	87.7358	0.738882	17.5704	12.9824	0.98288	199.832
1	Capan1	Control	0.0348086	6.37494	0.998142	1.25518	39.1878	139.723	64.8957	138.105	0.259572	0.00497762	0.00384917	0.100432	0.0706228	0.00403498	0.00354057	0.074228	0.0519247	57.5139	54.4665	127.818	42.0373	111.317	0.742723	36.5662	27.1585	0.82603	838.963	129.971	56.5476	0.790066	16.1862	12.7882	0.966471	183.562
1	Capan1	Control	0	9.28375	1.07832	1.01275	41.2794	118.205	52.9887	188.281	0.157025	0.00359728	0.00238244	0.0901459	0.0657982	0.00296649	0.00223305	0.0702222	0.0549669	47.0843	50.6076	189.793	38.9678	116.718	0.538158	26.5134	14.2684	0.793609	302.878	89.43	87.3786	0.862439	14.2098	12.2551	0.967335	153.525
1	Capan1	Control	0	10.526	1.08871	0.983897	13.2608	64.6306	16.8877	120.573	0.147945	0.00241084	0.00204651	0.087751	0.0592655	0.00262599	0.00266312	0.0556776	0.0384591	22.8046	21.1961	123.192	17.6742	65.6883	0.534105	28.3093	15.1201	0.824162	304.546	84.2776	86	0.808957	15.0648	12.1868	0.938386	150.604
1	Capan1	Control	0	10.2051	0.990802	1.15447	13.8146	76.6342	73.9743	144.377	0.236256	0.00277222	0.00190769	0.0784875	0.056726	0.00414308	0.00346051	0.0597891	0.0431706	50.5022	58.3003	137.485	16.152	66.3807	0.503916	37.85	19.0732	0.678079	561.533	86.7027	89.5062	0.779813	15.7154	12.2551	0.990568	164.789
1	Capan1	Control	0.00817439	8.57221	0.894805	1.01803	21.6995	71.8116	64.6854	220.246	0.179837	0.000674391	0.000649329	0.0893384	0.0604536	0.0043501	0.00355574	0.048972	0.0429478	49.368	52.0204	202.812	19.9047	70.5397	0.47573	25.6171	12.1868	0.647196	306.215	110.426	82.1138	0.630143	16.9048	10.6525	0.880658	148.519
1	Capan1	Control	0	10.7176	1.06232	0.985914	26.2796	83.3407	34.8105	125.447	0.166667	0.00274384	0.00241302	0.126734	0.0739639	0.00421369	0.00409687	0.078341	0.0567795	33.5329	33.8853	129.797	24.7294	84.5314	0.481372	29.6411	14.2684	0.787821	327.909	143.842	76.8519	0.772224	13.4868	10.4148	1.01364	122.236
1	Capan1	Control	0	10.7045	1.05682	1.2485	38.4049	153.905	57.3165	180.389	0.198738	0.00382707	0.00250245	0.0746242	0.0532352	0.00340778	0.00338853	0.0747219	0.0548762	50.6504	55.2498	193.753	41.233	123.272	0.413904	32.5844	13.4868	0.759333	396.745	90.6721	85.3659	0.695141	15.7684	10.9613	0.936509	154.776
1	Capan1	Control	0	7.78933	0.993305	1.03242	61.8245	121.618	51.3868	197.732	0.139986	0.00245698	0.00179366	0.0751915	0.0560604	0.00291057	0.00200051	0.0478369	0.0367956	53.4944	58.396	198.323	66.4663	117.799	0.618804	34.2388	21.1871	0.756263	602.001	164.028	81.6993	0.601477	22.1121	13.2999	0.882277	272.423
1	Capan1	Control	0	7.74603	1.10919	0.973698	17.8012	88.843	63.7135	154.554	0.119048	0.00227058	0.00177946	0.0694593	0.0505616	0.00205726	0.00187931	0.0952741	0.0513075	66.0137	60.6055	137.924	20.7849	91.2429	0.590221	20.1786	11.9098	0.854251	210.262	150.415	90	0.849403	12.5411	10.6525	0.993653	122.653
1	Capan1	Control	0	9.43178	0.949369	1.2267	22.5241	95.8296	24.2066	140.696	0.189406	0.00283855	0.00234103	0.0856794	0.061904	0.004941	0.00427843	0.064326	0.0450788	34.8903	31.4893	149.27	30.5446	78.1201	0.469636	24.7558	11.6262	0.757285	259.907	141.792	85.8586	0.724286	11.2802	8.17006	0.943471	89.6952
1	Capan1	Control	0	5.99691	1.07665	0.921249	16.7259	68.9338	25.0436	125.172	0.126739	0.00271422	0.00241043	0.0763809	0.0553248	0.00321699	0.0030068	0.0676575	0.0466632	25.6645	27.1122	122.353	29.8599	74.8265	0.70929	20.1164	14.2684	0.888939	269.92	93.56	89.7727	0.764375	13.6253	10.4148	0.937604	128.076
1	Capan1	Control	0	7.04011	1.06754	1.06337	15.5662	84.1053	27.4381	95.8977	0.172414	0.00262652	0.00211411	0.0796631	0.0609903	0.00329724	0.00320472	0.081407	0.0577865	38.933	34.3476	104.062	17.764	79.0929	0.62213	32.3015	20.0957	0.755089	592.822	158.212	93.4211	0.735824	17.3794	12.7882	0.973994	202.336
1	Capan1	Control	0.0229266	7.88941	0.755927	1.1714	29.0071	80.802	32.3708	110.876	0.259609	0.00507369	0.0038387	0.100343	0.0731071	0.00534325	0.00455335	0.0845054	0.054658	37.7006	38.9375	108.053	25.883	68.9792	0.574084	34.9324	20.0541	0.708852	618.688	97.1987	58.5366	0.891674	14.2684	12.7228	0.96633	158.114
1	Capan1	Control	0	8.66972	0.748702	1.20286	21.9256	84.9357	50.0604	127.625	0.215173	0.00683646	0.00603903	0.0881535	0.0709737	0.00791067	0.00726661	0.0893669	0.054667	43.837	44.543	122.165	23.8429	70.6114	0.549318	37.1828	20.4252	0.813405	637.879	103.294	54.7297	0.778621	16.3401	12.7228	0.990079	169.795
1	Capan1	Control	0	14.6825	0.902757	1.22608	24.2567	89.3257	54.1616	131.092	0.308605	0.00376618	0.00305344	0.108259	0.0807168	0.0060756	0.00516535	0.0873345	0.049643	56.3603	54.9114	130.136	26.009	72.8547	0.356031	50.7967	18.0852	0.647823	702.96	135.416	68.254	0.684811	15.5553	10.6525	0.975365	146.015
1	Capan1	Control	0.0359629	7.88863	1.0327	0.978507	21.7863	126.028	49.6574	150.875	0.12181	0.00115927	0.00107262	0.066108	0.0503589	0.00228075	0.00190223	0.0699751	0.0542288	46.7067	43.3567	145.527	25.0547	128.796	0.592105	26.6311	15.7684	0.85096	359.615	146.186	90.566	0.788377	16.4673	12.9824	0.975696	191.906
1	Capan1	Control	0	8.45445	0.963834	1.2102	30.6703	106.622	42.8813	137.366	0.245445	0.00345255	0.00255668	0.0900387	0.0564718	0.00454221	0.00351845	0.0642614	0.0443031	32.3092	41.5066	156.544	38.7949	88.103	0.485071	28.6826	13.9131	0.649221	389.235	140.902	89.9281	0.766965	11.9098	9.13441	0.9247	97.6217
1	Capan1	Control	0	7.92204	0.912151	0.908495	15.3573	82.1923	36.0842	191.423	0.101949	0.00169968	0.00125697	0.101133	0.0502318	0.00305121	0.0027293	0.0589091	0.0417754	42.1448	38.9854	194.466	31.8295	90.4709	0.595212	23.4756	13.973	0.870896	278.264	180.102	85.7143	0.745145	17.162	12.7882	0.960728	192.323
1	Capan1	Control	0	12.4262	1.15939	1.08693	34.2427	92.5185	43.184	118.667	0.235808	0.00374642	0.00239521	0.073489	0.0578269	0.00256347	0.00226619	0.060404	0.0425066	42.6549	47.5096	138.4	28.3182	85.1195	0.449909	38.5219	17.3313	0.706178	477.679	83.3949	93.75	0.808215	15.0787	12.1868	0.978347	156.445
1	Capan1	Control	0.0285189	19.9779	0.801974	1.24075	21.4609	79.5698	37.2424	150.212	0.310028	0.00352704	0.00306418	0.114702	0.0812921	0.00339492	0.00285308	0.080916	0.056496	48.3593	48.9923	120.049	26.6689	64.1304	0.309487	47.591	14.7288	0.56809	453.482	94.9049	72.0238	0.790986	15.4071	12.1868	0.963631	162.286
1	Capan1	Control	0	10.2082	1.09836	1.08562	25.358	86.2036	29.3236	99.991	0.208991	0.00296508	0.00246401	0.0879354	0.0588817	0.0025313	0.00224243	0.0749433	0.0493901	50.2464	40.4768	116.97	23.624	79.405	0.424817	36.7426	15.6089	0.688909	528.993	112.67	85.8065	0.792758	15.0233	11.9098	0.981542	162.286
1	Capan1	Control	0	6.61803	1.10293	1.10792	14.8399	76.9851	27.2262	119.099	0.207439	0.00304616	0.00243935	0.0961623	0.0610187	0.00338449	0.00304755	0.0650546	0.0452769	58.8065	44.2974	135.163	18.7201	69.4863	0.649587	31.0637	20.1786	0.809161	583.227	111.2	85.9155	0.808608	14.7288	11.9098	0.979911	156.862
1	Capan1	Control	0.00811595	14.2701	1.25712	1.24171	42.9679	127.702	115.171	177.939	0.293913	0.00512921	0.00476265	0.112189	0.073779	0.00602151	0.00552991	0.0925921	0.0589357	103.959	75.5969	152.975	42.4053	102.843	0.332411	50.6692	16.843	0.599879	719.647	176.367	62.7451	0.715926	17.7711	12.7228	0.953512	195.243
1	Capan1	Control	0.00557325	8.48726	1.14972	1.03724	19.3733	83.1411	63.3892	109.459	0.179936	0.00332845	0.00258384	0.0886782	0.0607155	0.0057861	0.00507049	0.0951034	0.0599107	68.7823	72.8994	124.743	21.9475	80.1564	0.586272	33.3437	19.5485	0.798179	523.987	149.924	92.6471	0.812277	14.2245	11.5542	0.972004	145.181
1	Capan1	Control	0	9.89523	1.03172	1.17465	56.6601	123.208	39.1241	96.0927	0.300349	0.00550311	0.00478254	0.0889988	0.0705431	0.00444256	0.00378076	0.0809935	0.0542299	57.1034	44.3463	111.626	51.711	104.889	0.4612	42.1075	19.42	0.635501	716.727	168.858	54.6392	0.700949	16.991	11.9098	0.952725	184.397
1	Capan1	Control	0	9.15254	1.07411	1.03263	23.2128	71.4613	40.6161	118.139	0.193503	0.00299745	0.00226727	0.085463	0.061704	0.00239738	0.00211294	0.0791582	0.049123	36.465	36.4546	121.91	20.2108	69.2035	0.528216	36.7653	19.42	0.73651	590.737	94.7237	89.6774	0.82365	16.1475	13.2999	0.960437	186.9
1	Capan1	Control	0.0366699	13.7265	0.721188	1.2634	27.5917	123.037	53.3531	134.949	0.277502	0.00718176	0.00641568	0.102203	0.0756822	0.00745805	0.0065099	0.123352	0.0635235	61.8582	63.3642	143.746	34.1197	97.3859	0.336471	53.7496	18.0852	0.709225	841.883	241.571	48.9583	0.749415	16.3529	12.2551	0.972596	180.225
1	Capan1	Control	0.0490134	8.64163	0.979489	1.13805	30.152	96.3881	44.2965	159.725	0.251432	0.00335021	0.00297005	0.0726897	0.0545636	0.00416823	0.00355612	0.0644079	0.0470977	65.7122	65.1043	178.432	30.0404	84.6955	0.611229	37.6289	22.9998	0.80151	655.4	103.425	88.8158	0.692244	15.8344	10.9613	0.984589	158.114
1	Capan1	Control	0	6.87382	0.974939	1.16612	21.7259	89.2727	54.7132	172.289	0.202448	0.00192442	0.00153763	0.0935414	0.0569639	0.00461852	0.00448541	0.0719443	0.046003	54.0239	54.486	163.951	23.8064	76.5552	0.629851	27.5929	17.3794	0.811375	443.052	183.599	85.3659	0.767378	15.2438	11.6977	0.958642	156.028
1	Capan1	Control	0	8.12821	0.868941	0.982836	16.6091	55.8942	61.7437	178.356	0.133013	0.0013908	0.00145791	0.0861199	0.066917	0.00454694	0.0032893	0.0918321	0.0545272	39.8165	53.207	184.548	15.9096	56.8704	0.529865	22.9998	12.1868	0.786	260.325	121.203	91.6667	0.601679	16.7685	10.0893	0.832309	147.684
1	Capan1	Control	0.0540153	13.2945	0.967786	1.41702	52.5066	145.293	83.3665	164.885	0.32935	0.00684612	0.00670063	0.111612	0.0774981	0.00686798	0.00600552	0.0868121	0.0587024	105.098	79.6029	156.29	54.6024	102.534	0.374661	53.8581	20.1786	0.550162	872.755	224.583	53.719	0.69972	19.0075	13.2999	0.990439	225.698
1	Capan1	Control	0	12.669	1.10721	1.17582	51.8251	153.912	52.0241	142.036	0.246441	0.00487326	0.00339963	0.0997585	0.0742415	0.00377877	0.003473	0.0806787	0.053541	47.5739	44.1255	148.463	44.4413	130.898	0.392342	38.5381	15.1201	0.620362	468.918	148.356	79.8742	0.827415	14.7288	12.1868	0.999862	147.267
1	Capan1	Control	0	7.58967	1.04936	1.08568	23.5315	95.2199	50.3082	121.9	0.188666	0.00431293	0.00356783	0.0954927	0.0670355	0.00376965	0.00299262	0.0914533	0.0576206	51.3698	55.2051	133.324	26.6106	87.7054	0.583322	33.2184	19.377	0.75223	581.558	249.486	79.4702	0.712172	17.8647	12.7228	0.964452	193.575
1	Capan1	Control	0	9.17099	1.1265	1.11181	33.0041	83.3068	55.4565	136.367	0.182632	0.00269291	0.00253306	0.0835955	0.0609996	0.00407729	0.00383078	0.0905257	0.0589999	73.5118	63.0681	142.424	31.8539	74.929	0.460887	32.6866	15.0648	0.744	465.998	227.594	80.1471	0.819572	14.8697	12.1868	0.989136	154.359
1	Capan1	Control	0.00815218	12.4837	1.08338	1.09084	28.7615	106.689	49.5524	128.78	0.175272	0.00522459	0.00449681	0.103313	0.0641878	0.00251781	0.00232533	0.0982484	0.0553384	91.3043	75.1885	165.453	35.6054	97.8052	0.356542	30.9561	11.0371	0.809366	307.049	212.968	90.1961	0.647921	14.5148	9.40445	0.92428	129.328
1	Capan1	Control	0	11.0945	1.12757	1.0757	38.3513	103.614	44.6408	153.752	0.191904	0.00306298	0.00229754	0.110356	0.057463	0.00468055	0.00435227	0.0766376	0.0503652	61.7053	55.2458	168.075	34.7536	96.3222	0.438671	27.7812	12.1868	0.780311	278.264	246.824	84	0.820716	12.6899	10.4148	0.984053	116.395
1	Capan1	Control	0	8.6933	1.04888	1.23652	19.598	100.939	32.4723	88.0843	0.314755	0.00532446	0.00465661	0.0958982	0.0668453	0.00470981	0.00434592	0.0605022	0.0461124	53.6796	46.4069	114.132	28.5085	81.6316	0.556342	53.0504	29.5142	0.655214	1294.95	107.024	58.2031	0.683412	18.9965	12.9824	0.914022	207.759
1	Capan1	Control	0.00905349	6.58436	0.93202	1.18635	34.9224	142.591	42.0711	143.648	0.212346	0.00532622	0.00489924	0.0837075	0.0722525	0.00510449	0.00509	0.100118	0.0665595	63.2322	80.805	180.719	38.3005	120.192	0.7	28.8855	20.2199	0.912352	506.882	233.01	66.3866	0.760937	16.8058	12.7882	0.954492	190.237
1	Capan1	Control	0	8.83073	1.11162	1.10445	24.2163	106.745	41.3136	115.46	0.217639	0.0034706	0.00267873	0.0981974	0.064294	0.00550775	0.00482638	0.0786731	0.0565413	55.6326	53.7043	137.431	31.7005	96.6506	0.530026	35.9854	19.0732	0.798895	586.565	290.742	72.2222	0.782624	16.3401	12.7882	0.991143	180.642
1	Capan1	Control	0	7.79201	1.01627	1.01487	29.9087	82.303	56.567	119.047	0.190344	0.00434074	0.00398377	0.0986471	0.0703161	0.0028711	0.00262991	0.0728888	0.0487958	40.5397	49.4237	122.38	28.9533	81.097	0.611301	29.5848	18.0852	0.774181	449.31	189.389	76.7442	0.824621	14.4428	11.9098	0.98271	152.69
1	Capan1	Control	0	13.7747	0.991893	1.01496	31.6174	98.8861	41.2048	121.92	0.240119	0.00274027	0.00219207	0.106391	0.0751867	0.00329843	0.00289933	0.0698856	0.0464008	43.5402	43.1162	125.445	29.7394	97.429	0.372667	38.13	14.2098	0.589686	422.193	208.056	82.8025	0.882523	13.1738	11.6262	1.00579	134.334
1	Capan1	Control	0.0331541	8.35125	1.05588	1.12106	32.2364	99.4958	55.2858	142.097	0.217742	0.00298395	0.00255307	0.0902965	0.0640099	0.00373685	0.00288132	0.105256	0.0547456	42.503	47.9983	139.33	32.8864	88.7516	0.463241	31.1776	14.4428	0.667604	465.58	205.706	82.5503	0.742256	14.8697	11.0371	0.98372	148.101
1	Capan1	Control	0	12.0538	0.990976	1.10639	34.9441	97.0552	36.1744	142.877	0.220049	0.00306534	0.0025534	0.0968977	0.0680586	0.00281566	0.00265022	0.0633925	0.0524504	36.6977	35.0415	138.231	36.9376	87.7227	0.414739	32.0681	13.2999	0.679293	341.259	206.573	92.8	0.834548	13.3156	11.1125	0.968803	135.169
1	Capan1	Control	0.0708052	9	0.766045	1.40516	24.3966	147.201	64.4902	155.701	0.341275	0.00300535	0.00241199	0.11976	0.078565	0.00333067	0.00289585	0.0750709	0.0519385	63.6647	78.6603	146.333	42.2277	104.757	0.449044	52.8889	23.7495	0.608171	1243.22	271.169	67.7903	0.758728	16.7685	12.7228	0.981964	183.145
1	Capan1	Control	0.112225	13.3387	0.586201	1.29146	34.6408	141.061	131.52	245.689	0.318637	0.00806872	0.00675818	0.110519	0.078497	0.00776982	0.00713462	0.133233	0.0595053	123.361	125.845	187.965	45.6689	109.227	0.441261	37.2612	16.4419	0.654363	416.352	299.085	58.7413	0.740233	12.3399	9.13441	0.981276	103.462
1	Capan1	Control	0	13.5558	1.02089	1.14919	30.8428	152.211	37.7176	233.358	0.223313	0.00132582	0.00136186	0.105419	0.0688049	0.00331487	0.00297969	0.0650212	0.0509607	58.3658	52.051	218.017	39.8235	132.45	0.304445	33.9451	10.3344	0.575769	340.007	334.233	92.3077	0.586195	17.6296	10.3344	0.932345	163.12
1	Capan1	Control	0	8.75486	1.17452	1.01925	22.2293	121.78	132.678	255.983	0.101167	0.00417063	0.00406718	0.067205	0.051275	0.00452811	0.00397041	0.0613539	0.0431549	253.437	197.268	296.946	30.3437	119.48	0.590292	21.6641	12.7882	0.864479	214.434	381.308	91.25	0.818161	14.2976	11.6977	0.964168	152.69
1	Capan1	Control	0	8.4657	0.996521	0.977475	19.4691	73.1467	35.1545	204.6	0.116424	0.00023411	0.000238745	0.109235	0.0909445	0.0031179	0.00279762	0.0728303	0.0456024	41.2512	37.2523	193.065	21.2749	74.8323	0.567627	20.6082	11.6977	0.84261	200.667	239.498	94.9367	0.849473	13.6864	11.6262	0.972414	136.003
1	Capan1	Control	0	9.48968	1.07535	0.934049	33.9081	103.399	39.6126	155.293	0.223782	0.00352108	0.00316154	0.0964535	0.0640298	0.00352931	0.0033123	0.0636775	0.0477605	52.6011	46.0216	154.296	35.4807	110.7	0.507514	34.6205	17.5704	0.664688	505.213	228.387	78.2051	0.691398	15.4071	10.6525	0.968111	148.936
1	Capan1	Control	0	20.4295	0.88136	1.20089	44.6099	114	48.5502	140.102	0.307639	0.00450935	0.00421268	0.0986315	0.0709435	0.00190027	0.00179237	0.0855991	0.0554293	50.3113	46.0646	119.314	41.4592	94.9298	0.271743	55.6412	15.1201	0.579959	606.172	239.566	76.5625	0.761926	15.3529	11.6977	0.990736	154.776
1	Capan1	Control	0	6.08299	0.962898	0.850928	101.383	141.449	190.313	461.159	0.120332	0.00403601	0.00464374	0.212343	0.0703855	0.00558165	0.0043438	0.0628932	0.0472108	171.607	166.741	413.443	108.201	166.229	0.731292	17.4871	12.7882	0.924695	201.084	252.806	87.6712	0.6632	14.1804	9.40445	0.907559	113.475
1	Capan1	Control	0.0686456	8.37477	0.867309	1.20473	32.7576	154.917	39.1021	145.06	0.237477	0.0063036	0.00491658	0.0863756	0.0719249	0.00670269	0.00641368	0.0952237	0.0606846	151.565	121.785	191.906	44.018	128.59	0.553716	30.6853	16.991	0.740939	449.727	270.492	62.6866	0.841085	13.8229	11.6262	0.988703	149.353
1	Capan1	Control	0	9.97231	1.05639	1.07744	19.642	102.676	32.62	120.256	0.140575	0.00272697	0.00231153	0.101064	0.0570108	0.00258217	0.00227966	0.0781909	0.0530958	43.7753	45.304	135.015	28.5167	95.297	0.499466	31.2511	15.6089	0.823258	391.738	211.354	82.4561	0.697486	16.6687	11.6262	0.957938	165.623
1	Capan1	Control	0	8.01837	0.947243	1.00503	24.825	117.731	87.7585	260.306	0.161883	0.00039272	0.00045917	0.080622	0.0576726	0.00405963	0.00335949	0.0664564	0.0502499	102.526	88.0377	235.57	32.6023	117.141	0.51551	26.989	13.9131	0.755834	363.37	308.563	89.8305	0.596285	15.6222	9.3153	0.858709	151.022
1	Capan1	Control	0	9.70043	1.02259	0.948188	22.9974	93.4429	34.6134	148.271	0.136947	0.00117674	0.00105736	0.0910722	0.0574389	0.00236844	0.00223433	0.0558751	0.0458103	36.217	35.5228	146.37	23.2492	98.5488	0.522438	26.6311	13.9131	0.804241	292.448	363.66	88	0.83891	15.2438	12.7882	0.985716	168.543
1	Capan1	Control	0.0123839	8.83798	1.08476	1.04898	43.3747	111.087	43.0657	128.585	0.20227	0.00376266	0.00383577	0.0926833	0.0653498	0.00329283	0.00303688	0.092363	0.0588319	46.1758	43.1552	133.633	40.4664	105.9	0.477421	29.8864	14.2684	0.71318	404.254	221.116	89.313	0.876537	14.5148	12.7228	0.995311	151.022
1	Capan1	Control	0.010274	9.98174	1.05123	1.04614	38.9296	113.138	36.5615	130.633	0.189498	0.00560612	0.00527213	0.11795	0.0867475	0.00749504	0.00620226	0.0999424	0.0722553	59.1023	45.8339	138.696	40.6759	108.148	0.462698	30.1988	13.973	0.708654	365.456	251.238	54.4	0.82662	14.7429	12.1868	0.979911	156.862
1	Capan1	Control	0.0316594	8.55895	1.02232	1.08439	31.5236	118.319	46.9363	179.171	0.165939	0.00460698	0.00342891	0.0759681	0.0511493	0.0046445	0.00413096	0.0949904	0.0548995	44.0819	47.9038	177.795	36.8731	109.111	0.566046	28.5952	16.1862	0.811141	382.143	306.147	90.3509	0.811197	15.0233	12.1868	0.904319	164.372
1	Capan1	Control	0	8.53873	1.15177	1.32338	37.0368	121.315	25.5438	52.192	0.278609	0.00604732	0.00457479	0.120659	0.0843832	0.00652947	0.00599043	0.0672807	0.0505978	32.7345	30.5564	70.4279	45.0368	91.6706	0.545648	44.9817	24.5442	0.830252	947.848	168.237	17.4157	0.682485	18.6418	12.7228	0.92605	206.925
1	Capan1	Control	0	16.5335	1.08308	1.18756	40.4633	129.75	54.9631	119.405	0.266014	0.00397989	0.00304044	0.0981896	0.0688192	0.00303904	0.00280219	0.0637281	0.0479392	64.2826	58.1698	133.153	38.308	109.258	0.345831	47.8359	16.5431	0.662491	553.607	283.669	77.439	0.719377	16.5557	11.9098	0.982939	178.139
1	Capan1	Control	0	10.0532	0.863259	1.10863	30.1395	188.46	40.1346	182.84	0.189369	0.0106731	0.00829443	0.0718781	0.0702688	0.00835591	0.00696472	0.0911776	0.0643063	76.0582	77.4012	193.89	46.6252	169.994	0.485071	25.1238	12.1868	0.788203	251.146	232.283	63.8298	0.75079	12.4073	9.3153	0.935849	107.217
1	Capan1	Control	0	9.62898	1.6015	1.08484	20.0248	99.5071	59.5443	117.865	0.20053	0.00241057	0.00194505	0.107392	0.0665189	0.00489607	0.00457132	0.0878123	0.0500062	155.009	89.8712	137.608	30.2355	91.7252	0.484626	33.717	16.3401	0.7373	472.255	277.932	84.058	0.754718	16.1475	12.1868	1.00163	173.133
1	Capan1	Control	0	8.66883	0.745284	1.29459	41.4454	124.355	60.1273	122.531	0.289502	0.00520008	0.00421318	0.119823	0.0892608	0.00562063	0.00494355	0.0762486	0.0548656	60.7713	54.3683	110.577	47.0376	96.0578	0.53818	40.8758	21.9986	0.680964	770.961	251.397	42.1053	0.715542	16.1475	11.5542	0.935235	149.77
1	Capan1	Control	0	10.9834	1.06378	1.21506	32.6104	133.478	55.2384	149.592	0.189638	0.00438311	0.00293704	0.0835734	0.0618288	0.00358268	0.00274807	0.0668922	0.0478269	61.2855	55.8233	170.507	38.3514	109.852	0.393974	34.2327	13.4868	0.717745	426.782	290.748	88.0597	0.747922	14.7571	11.0371	0.949992	144.347
1	Capan1	Control	0	16.5898	0.939028	1.16101	66.6056	150.68	43.6506	106.369	0.286564	0.0104618	0.00929694	0.145001	0.0857296	0.00739963	0.00694261	0.110446	0.0766617	47.035	44.6595	110.775	64.422	129.784	0.216837	38.1464	8.27156	0.563177	350.854	233.162	47.2973	0.485071	15.9787	7.7508	0.835907	120.984
1	Capan1	Control	0.0252873	9.27356	1.0581	1.09067	43.2109	135.785	51.8835	165.468	0.218966	0.00341095	0.0027159	0.0966251	0.0689775	0.00385773	0.00328358	0.061388	0.0451006	63.5755	56.6781	167.923	43.3995	124.497	0.536242	41.0235	21.9986	0.728096	725.905	183.781	87.931	0.802067	16.1862	12.9824	0.980805	188.151
1	Capan1	Control	0	12.4491	1.12021	1.04921	24.1332	85.8439	47.5409	132.318	0.202546	0.00415913	0.00344555	0.115263	0.0829526	0.00538852	0.00515833	0.0952132	0.0582951	90.2628	73.2112	164.398	25.967	81.8178	0.393325	33.4935	13.1738	0.670591	360.449	276.706	78.4615	0.772988	14.1804	10.9613	0.972414	136.003
1	Capan1	Control	0	9.68986	1.06207	0.99451	35.6777	130.008	49.2889	207.473	0.177932	0.00296247	0.00264445	0.0808786	0.0667297	0.00253473	0.00217151	0.0507915	0.0403383	54.778	52.1772	214.906	36.2779	130.726	0.452957	31.8855	14.4428	0.716752	419.69	222.987	85.7143	0.830455	14.7571	12.2551	0.960184	156.445
1	Capan1	Control	0	6.68864	1.16415	1.00621	13.3664	86.6355	32.8581	108.597	0.170859	0.00156541	0.00131252	0.083393	0.0550077	0.00199595	0.00175067	0.0655086	0.0480251	39.6087	37.7528	109.904	16.3864	86.1007	0.72878	28.3608	20.6688	0.902111	481.016	72.9492	87.1795	0.775343	16.991	13.1738	0.894262	195.243
1	Capan1	Control	0	7.56395	1.24828	1.09478	35.5794	96.997	36.7929	94.9791	0.196221	0.0050138	0.0045737	0.0771543	0.0604334	0.00311511	0.0023591	0.0602132	0.0406562	56.7157	44.8191	101.93	30.7629	88.5993	0.608674	32.9472	20.0541	0.828437	574.049	90.9834	86.2319	0.812314	16.9048	13.732	0.939538	206.507
1	Capan1	Control	0	7.58086	1.14816	1.17529	43.0419	101.578	26.1047	83.7478	0.230198	0.00426269	0.00324155	0.083128	0.0628225	0.00304473	0.00305303	0.0692599	0.0415257	37.6396	31.1924	92.537	36.6856	86.4284	0.593096	30.9561	18.3599	0.808892	505.63	78.7788	81.8182	0.823529	15.5285	12.7882	0.982798	167.709
1	Capan1	Control	0	8.01275	1.09104	0.939595	30.8933	96.5183	41.1775	153.506	0.123273	0.000901572	0.00087522	0.0807322	0.0564225	0.00161233	0.00162014	0.0617741	0.040577	41.1987	39.1713	147.447	32.6495	102.723	0.618031	28.0428	17.3313	0.79984	392.573	88.348	92.3077	0.805308	18.7756	15.1201	0.981611	240.3
1	Capan1	Control	0	12.6174	0.934291	1.34364	23.0841	109.672	47.6644	90.5484	0.295977	0.00364591	0.003174	0.0908461	0.0729655	0.00543786	0.00503721	0.0609883	0.0447706	61.9712	54.9454	105.427	31.4957	81.6229	0.389877	56.6186	22.0743	0.642341	1016.27	63.752	41.3043	0.809186	16.0438	12.9824	0.906388	184.397
1	Capan1	Control	0.00655401	15.5157	0.899659	1.32846	27.0555	99.5964	41.8748	104.114	0.270783	0.00507582	0.00465282	0.100266	0.0687796	0.00332676	0.00285685	0.0735489	0.0529273	56.9232	47.1979	111.082	29.3666	74.9712	0.335799	68.4928	22.9998	0.646633	1209.42	108.767	67.6	0.882258	17.5704	15.5016	0.974552	237.379
1	Capan1	Control	0.0369943	9.63006	1.04758	1.11882	21.5994	81.2377	51.3261	147.855	0.201734	0.00219252	0.00182128	0.0899803	0.063926	0.00301778	0.00255573	0.0606214	0.0454952	50.4132	48.6546	158.327	22.9443	72.6102	0.525919	41.6843	21.9226	0.697339	721.733	115.06	82.2222	0.822407	17.7711	14.615	0.986108	224.029
1	Capan1	Control	0.0517892	7.43126	0.779522	1.10055	19.4946	101.188	111.456	172.459	0.175141	0.0055976	0.00461197	0.0772391	0.057625	0.006664	0.00635475	0.0825254	0.0489411	83.6792	119.207	191.26	25.5971	91.9429	0.627144	28.6899	17.9927	0.796345	443.052	136.419	69.6	0.804943	15.887	12.7882	0.971251	179.808
1	Capan1	Control	0	10.0184	1.07309	0.977163	14.3183	64.4886	21.4167	95.7123	0.183824	0.00202158	0.00172875	0.0701365	0.049064	0.00252792	0.00214716	0.052267	0.0375799	23.9657	27.762	107.023	16.2323	65.9957	0.46135	33.717	15.5553	0.732252	453.899	62.8254	91.9118	0.718278	16.1862	11.6262	0.860214	160.2
1	Capan1	Control	0	10.9467	1.05354	1.05784	29.0496	120.059	34.0287	140.348	0.179509	0.00280494	0.0026437	0.0769982	0.056458	0.00195228	0.00168243	0.0617387	0.0399662	35.9595	34.9615	145.422	31.4394	113.494	0.410264	36.7199	15.0648	0.669813	492.698	115.585	89.5425	0.774962	17.162	13.2999	0.944057	197.329
1	Capan1	Control	0	11.4146	1.13184	1.15822	21.4455	95.7809	37.5292	142.433	0.197497	0.00313643	0.00270788	0.0811191	0.0605228	0.00282012	0.00241673	0.0695565	0.0502404	45.6384	41.9105	154.121	28.0831	82.6969	0.513683	46.7776	24.0289	0.723175	766.789	119.253	93.8889	0.8318	17.5704	14.615	0.957966	219.023
1	Capan1	Control	0	9.10059	1.28811	1.1308	20.6342	83.4916	27.2083	70.5687	0.230492	0.00488317	0.00460024	0.0918471	0.0671791	0.00511797	0.00483557	0.0645778	0.0471206	32.1479	33.6033	85.123	23.3642	73.8341	0.510011	45.8725	23.3955	0.787882	924.903	98.4846	59.2391	0.81942	17.0522	13.973	0.952251	205.673
1	Capan1	Control	0.0083709	11.6343	0.912888	1.0588	41.2091	103.251	42.679	110.423	0.267225	0.00932278	0.00792473	0.0902264	0.072592	0.00959329	0.00848943	0.0934585	0.068346	50.9	44.962	111.992	41.8138	97.5164	0.446371	43.4101	19.377	0.874847	647.891	145	0	0.772608	16.4673	12.7228	0.945272	176.887
1	Capan1	Control	0	10.3142	1.76445	1.09469	26.2821	88.4807	22.8195	64.3043	0.239019	0.00495023	0.00450861	0.116625	0.0795772	0.00545954	0.00543115	0.0750321	0.0481278	65.2431	59.1349	94.5541	27.1296	80.8272	0.481072	52.1382	25.0822	0.81495	1054.23	156.433	50.7853	0.876795	16.6687	14.615	1.0069	214.017
1	Capan1	Control	0.0239	9.40576	0.956192	1.25412	29.472	112.182	55.6017	120.796	0.208039	0.00403213	0.00360094	0.092992	0.0654903	0.00395032	0.00355922	0.0747061	0.0513333	47.3234	58.0471	143.995	33.0134	89.4507	0.486358	42.4971	20.6688	0.812012	768.041	155.819	67.4847	0.789189	17.6296	13.9131	0.992921	209.011
1	Capan1	Control	0.00577319	8.32	1.10355	1.16307	16.9091	73.6667	36.8267	71.7662	0.299381	0.00509769	0.00471995	0.0944357	0.0698462	0.00335246	0.00323962	0.0749952	0.0482411	42.5676	39.167	99.7174	19.4048	63.338	0.541681	45.8725	24.8483	0.705023	1011.68	148.887	52.8302	0.829599	16.843	13.973	0.983499	205.673
1	Capan1	Control	0.00347826	14.7316	0.762252	1.21487	36.3713	139.623	35.6973	176.132	0.423768	0.00790219	0.00689175	0.12562	0.0828375	0.00444999	0.00370405	0.0645071	0.0513725	63.3842	69.0655	133.796	63.4742	114.928	0.310375	51.4819	15.9787	0.535423	719.647	184.462	54.9107	0.782013	16.3529	12.7882	0.970902	169.378
1	Capan1	Control	0	9.01575	1.03168	1.04616	26.8041	121.077	69.8882	199.624	0.146654	0.00332115	0.00272697	0.0718521	0.0569732	0.00373613	0.00358819	0.0658919	0.0444614	63.446	67.8837	190.469	35.3078	115.735	0.544925	30.9089	16.843	0.747439	423.862	133.183	90.6977	0.721037	17.7358	12.7882	0.933667	198.998
1	Capan1	Control	0.0222522	7.71679	1.04515	1.10904	15.5958	77.6421	49.9267	117.787	0.172623	0.00376556	0.00301004	0.0998224	0.0631339	0.0038183	0.00335606	0.095162	0.0555898	45.397	46.1795	118.033	21.5625	70.0086	0.591209	34.5481	20.4252	0.910659	618.688	186.746	68.1818	0.878454	15.3529	13.4868	1.01578	182.728
1	Capan1	Control	0	11.2465	0.883371	1.18138	50.7205	125.095	57.0592	187.855	0.306163	0.0035399	0.00306314	0.1003	0.0727554	0.00486825	0.00433113	0.056512	0.0419918	61.8624	54.814	172.257	46.096	105.889	0.425458	48.5801	20.6688	0.633381	839.38	114.932	63.0332	0.784465	16.9541	13.2999	0.936341	189.403
1	Capan1	Control	0.00292113	9.34177	1.1872	1.28988	22.086	93.3365	31.2987	76.6346	0.212269	0.00369845	0.00303164	0.0942401	0.0729544	0.00283572	0.00210086	0.0659405	0.048648	40.4889	42.7434	99.7262	25.2242	72.3605	0.496811	44.7353	22.225	0.792838	856.902	174.183	76.7045	0.857075	17.0522	14.615	0.998708	216.937
1	Capan1	Control	0	9.25684	1.19803	1.09813	17.634	76.5121	38.6885	105.087	0.212141	0.00379668	0.00309658	0.0972856	0.0646933	0.00186692	0.00173991	0.0544736	0.0371839	53.1313	46.5967	120.182	22.9886	69.675	0.504805	38.0424	19.204	0.773632	625.363	122.788	88.2353	0.815855	16.3018	13.2999	0.99111	191.489
1	Capan1	Control	0	9.69176	1.21892	1.00357	20.9182	72.1869	25.5777	91.4091	0.153405	0.00323738	0.00291928	0.10236	0.0667367	0.00249035	0.00221725	0.0678171	0.0414853	45.4358	35.5081	100.652	21.8501	71.9299	0.564219	37.5512	21.1871	0.795182	581.976	193.035	86.8056	0.764494	17.6415	13.4868	0.987042	206.925
1	Capan1	Control	0	6.48814	1.20936	1.07044	20.3683	76.7731	29.5868	118.42	0.149962	0.00392189	0.00310004	0.0859615	0.0612227	0.00260369	0.00238616	0.0681235	0.0465215	39.762	37.6696	124.235	21.7039	71.7211	0.678511	29.7395	20.1786	0.908455	545.263	184.169	79.0323	0.834597	15.5553	12.9824	0.98978	180.225
1	Capan1	Control	0	9.47286	1.22752	1.1946	36.8238	85.4249	36.2281	79.0482	0.285045	0.0038199	0.00309759	0.105058	0.0747997	0.002507	0.00234963	0.0706789	0.0480355	77.9623	55.5965	98.0228	29.8344	71.5092	0.487942	50.3015	24.5442	0.693832	1068.42	194.499	47.5113	0.838899	17.9579	15.0648	0.991519	226.115
1	Capan1	Control	0	11.0407	1.13921	1.27004	61.1707	162.738	33.4575	101.234	0.227173	0.00513401	0.00471768	0.0980327	0.0705757	0.00326116	0.00298859	0.0873299	0.0571169	37.7693	40.8601	120.826	56.9639	128.136	0.423502	45.7542	19.377	0.77311	758.446	110.558	86.9822	0.813579	17.1011	13.9131	0.927167	207.342
1	Capan1	Control	0	7.98253	1.08596	1.07251	14.4923	67.1913	42.373	116.097	0.161572	0.00115383	0.00100539	0.0933474	0.0653731	0.0040629	0.0037648	0.076286	0.0500489	36.6439	40.8969	116.205	15.3439	62.6488	0.603418	30.8751	18.6306	0.75519	477.679	106.955	88.2353	0.779391	17.0645	13.2999	0.975547	197.329
1	Capan1	Control	0.0570498	10.0701	0.924724	1.03344	30.9752	81.8045	38.4321	153.365	0.186634	0.00326106	0.00245835	0.0986569	0.0667471	0.00493106	0.00425504	0.0754663	0.0486116	46.3839	43.1707	153.267	31.7755	79.1572	0.511442	35.8983	18.3599	0.742447	511.888	182.779	84.6154	0.848096	15.0787	12.7882	0.980877	172.298
1	Capan1	Control	0.0116239	11.3984	0.86219	1.08626	33.3204	113.295	45.0759	94.742	0.32441	0.00830862	0.00751171	0.136261	0.0822478	0.00636902	0.00554597	0.0915158	0.0601695	54.0617	47.6178	113.736	41.4387	104.299	0.438562	58.0951	25.4783	0.603909	1184.39	216.266	45.0382	0.803441	17.3914	13.973	0.97926	209.845
1	Capan1	Control	0.00669342	16.0834	1.05958	1.35338	27.154	126.798	53.0328	93.0544	0.359151	0.00332514	0.00271633	0.090938	0.0652053	0.00363333	0.00307638	0.0753185	0.051681	59.0541	52.6796	115.838	35.6974	93.6893	0.345929	93.6555	32.3982	0.541388	2181.47	154.083	77.8061	0.663664	19.269	12.7882	0.939036	217.354
1	Capan1	Control	0	6.67454	1.13344	1.07824	34.0151	79.6704	24.8321	83.2056	0.190195	0.00285446	0.00216416	0.0897556	0.068222	0.00224197	0.00218958	0.0747059	0.0561607	27.8796	30.2086	96.0633	28.9305	73.8896	0.63969	34.3301	21.9606	0.795326	706.297	104.808	85.5346	0.859396	15.9787	13.732	0.944962	192.323
1	Capan1	Control	0.0311526	15.4118	0.922065	1.00459	50.4149	120.227	74.6473	187.089	0.334579	0.0106267	0.00998835	0.123395	0.074621	0.00947047	0.00904671	0.137661	0.07311	108.358	80.477	189.646	51.0815	119.677	0.354239	50.7926	17.9927	0.661991	669.585	269.985	26.5193	0.82382	16.6687	13.732	0.985314	200.667
1	Capan1	Control	0	9.99024	1.18428	1.0579	30.1581	75.2865	51.3104	111.936	0.149268	0.00171777	0.00140676	0.0929405	0.0623224	0.00319292	0.00259248	0.0850925	0.0507098	52.8455	49.2077	118.69	28.1167	71.1659	0.49529	32.6802	16.1862	0.682289	427.616	159.321	92.8571	0.69777	19.9394	13.9131	0.951134	251.564
1	Capan1	Control	0.0229786	6.83915	1.0642	1.13143	21.1722	92.7276	50.5748	138.658	0.153191	0.00238729	0.00188708	0.0998692	0.0663409	0.00381037	0.00328691	0.0682409	0.0433687	52.9936	51.5399	134.023	25.7325	81.956	0.71533	28.9504	20.7091	0.869564	490.195	207.151	92.623	0.829599	16.843	13.973	0.983499	205.673
1	Capan1	Control	0	8.35108	1.10149	1.13765	17.9233	83.8273	13.3937	62.3686	0.198718	0.00413118	0.00348545	0.109627	0.0747253	0.00432915	0.00425264	0.0666326	0.0477935	42.2155	37.4247	88.8513	22.6195	73.6843	0.626904	42.0282	26.3477	0.818927	846.055	185.058	66.4706	0.791149	18.4732	14.615	0.974948	231.539
1	Capan1	Control	0	9.83479	0.940005	1.07425	36.528	105.619	48.0172	124.275	0.204005	0.00483337	0.00468946	0.109842	0.0731261	0.00557904	0.00517944	0.0839813	0.0578577	54.4342	52.0679	128.328	36.8565	98.3187	0.514488	40.4861	20.8296	0.746696	666.665	228.733	68.0982	0.792583	17.6296	13.973	0.982718	211.097
1	Capan1	Control	0.00286123	12.7115	1.00716	1.16761	27.2658	107.053	48.1941	107.951	0.255126	0.00574015	0.00539149	0.123538	0.0792538	0.00506271	0.00446079	0.0800963	0.0482808	72.0887	62.0428	130.794	30.305	91.6852	0.447079	52.727	23.5731	0.638765	874.841	260.369	64.486	0.676291	25.1238	16.991	0.986188	365.873
1	Capan1	Control	0.0632183	9.03271	1.04591	1.19923	38.1352	124.982	174.551	148.166	0.25641	0.0097155	0.00820308	0.106492	0.0798254	0.00970574	0.00891885	0.170937	0.0733748	123.411	127.747	141.007	39.1816	104.218	0.549792	46.1626	25.3798	0.861158	943.677	254.369	12.7907	0.789702	18.507	14.615	1.01811	230.287
1	Capan1	Control	0	11.2303	0.923314	1.08072	25.1537	91.0388	43.2047	114.069	0.25988	0.00298618	0.00251111	0.0957826	0.0698561	0.00363421	0.00289162	0.0711081	0.0447093	41.4291	42.2846	113.806	25.181	84.239	0.429272	54.1671	23.2524	0.6002	1045.05	212.608	83.4008	0.83835	18.8089	15.7684	1.02171	250.729
1	Capan1	Control	0.0783522	10.7851	0.83561	0.990386	24.1683	95.919	45.3049	192.874	0.174475	0.0038321	0.00352378	0.0914646	0.0701587	0.00481796	0.00403042	0.08656	0.0592711	48.4202	51.2201	175.465	27.566	96.8501	0.484635	37.3171	18.0852	0.722709	516.477	273.317	89.1156	0.835456	17.6296	14.7288	1.01957	218.606
1	Capan1	Control	0	8.69545	1.13648	1.25817	51.4522	120.335	35.2575	131.869	0.350568	0.00419041	0.00406364	0.106161	0.0735003	0.00522559	0.00437692	0.0624189	0.0493045	64.3769	57.2207	150.189	37.332	95.6425	0.470788	39.9519	18.8089	0.500598	734.249	285.29	73.6402	0.831973	15.8344	13.1738	0.992504	181.059
1	Capan1	Control	0	9.97915	1.19929	1.14331	27.1263	115.516	37.6768	71.1797	0.292628	0.00416188	0.00396979	0.108872	0.07798	0.00275801	0.00251353	0.0762148	0.0552164	53.9215	43.2103	89.1124	32.4788	101.036	0.536394	52.8731	28.3608	0.681298	1120.56	253.58	64.7826	0.897444	17.5704	15.7684	0.98362	241.134
1	Capan1	Control	0	10.5478	1.13781	1.22042	31.9805	111.886	23.6086	65.0696	0.276324	0.00534892	0.00472997	0.102859	0.0816935	0.00509759	0.00471859	0.0642898	0.045617	51.0607	37.1267	82.2425	33.4578	91.6782	0.451196	60.1242	27.1278	0.703569	1370.88	247.435	37.9032	0.8	18.8311	15.0648	0.978592	239.048
1	Capan1	Control	0.0738773	10.9173	0.619374	1.417	75.2622	205.63	103.495	155.046	0.312057	0.00751981	0.00655209	0.117975	0.0861543	0.00871609	0.00816804	0.112898	0.0613229	60.2304	74.8108	118.376	72.6195	145.116	0.470894	62.0736	29.2301	0.733034	1411.76	247.907	2.88066	0.814997	21.3245	17.3794	0.988107	315.81
1	Capan1	Control	0	7.09107	1.1941	1.08023	34.562	116.963	63.8098	154.183	0.181256	0.00511255	0.00482395	0.110372	0.0728801	0.00407229	0.00356125	0.0609901	0.0404268	100.496	74.5776	161.62	35.189	108.276	0.607517	28.9216	17.5704	0.783078	471.838	330.922	77.8626	0.706274	18.8311	13.2999	0.927167	207.342
1	Capan1	Control	0	8.27096	0.910581	1.43396	32.8436	119.11	52.2744	95.4247	0.299027	0.00487306	0.00412687	0.153833	0.106529	0.00367327	0.00324473	0.0545174	0.0433445	46.573	43.2353	82.3457	34.9286	83.0637	0.594393	48.01	28.5368	0.707878	1114.72	206.264	38.2883	0.754281	16.9541	12.7882	0.969092	184.397
1	Capan1	Control	0	8.51257	1.09171	1.06583	45.2993	137.21	44.8102	153.1	0.249797	0.00331134	0.00278211	0.113226	0.0725403	0.00198416	0.00178367	0.0737424	0.0486992	53.4298	45.3848	155.193	45.3183	128.736	0.554912	33.0862	18.3599	0.782761	514.391	215.119	94.1606	0.813815	15.9526	12.9824	0.981565	177.722
1	Capan1	Control	0	7.62246	1.14651	1.07779	17.987	83.7726	32.8431	100.894	0.216533	0.00379786	0.00304388	0.097259	0.0649844	0.00385899	0.0034027	0.0740147	0.0530431	63.9159	42.2411	109.628	22.6957	77.7263	0.610685	35.8983	21.9226	0.85505	676.26	69.4054	67.1233	0.632456	18.8311	11.9098	0.909145	200.667
1	Capan1	Control	0	11.0334	1.03858	1.04243	18.5866	82.8165	21.6789	108.918	0.163239	0.00263448	0.00148039	0.0775796	0.0596905	0.00334611	0.00292474	0.06404	0.0504709	21.3545	22.126	108.529	20.6547	79.4456	0.409578	29.9213	12.2551	0.750245	324.571	56.2492	89.2857	0.739171	15.7287	11.6262	0.904578	159.783
1	Capan1	Control	0.00468019	9.4883	1.1522	1.11174	21.4653	101.12	29.3368	100.248	0.197348	0.00307845	0.00228879	0.0849086	0.0599039	0.00264669	0.00252234	0.0704499	0.0558555	42.1747	35.5134	115.163	24.3019	90.9564	0.435214	35.6183	15.5016	0.732272	534.833	76.7888	87.8378	0.775738	15.3529	11.9098	0.911728	161.868
1	Capan1	Control	0	14.4573	1.14099	1.0443	9.24016	66.08	25.1032	91.552	0.196815	0.000457035	0.000417983	0.086912	0.0678244	0.00197056	0.00189964	0.0605536	0.0414749	37.6748	36.9137	110.653	14.4378	63.277	0.356601	36.4061	12.9824	0.696897	366.707	56.0166	83.4646	0.782296	16.2633	12.7228	0.85544	181.476
1	Capan1	Control	0	14.204	0.893127	1.31939	32.3201	111.721	24.1767	124.647	0.289802	0.00543062	0.00488576	0.0962451	0.064362	0.00331677	0.00266604	0.0652852	0.0465619	36.8782	39.0887	103.244	31.1077	84.6758	0.288914	44.9353	12.9824	0.640761	568.626	64.7391	78.3626	0.719066	15.2438	10.9613	0.886451	141.426
1	Capan1	Control	0	13.0983	0.901491	1.19188	24.0966	114.541	31.5649	96.8917	0.268026	0.00419784	0.00374566	0.0809819	0.0581098	0.0050188	0.00438398	0.0571623	0.044587	38.4742	29.2309	97.6733	30.5246	96.1011	0.39232	43.309	16.991	0.691376	572.797	84.79	65.2174	0.725379	17.6296	12.7882	0.914292	197.329
1	Capan1	Control	0	11.8697	1.11616	1.08678	16.3384	96.537	10.3854	72.7407	0.174185	0.00127969	0.00105278	0.062523	0.0475956	0.00215717	0.00205052	0.0703507	0.050923	43.9663	36.1648	90.7209	20.7373	88.8285	0.389906	31.4309	12.2551	0.598692	332.915	116.951	87.5912	0.714675	17.0522	12.1868	0.968094	189.403
1	Capan1	Control	0.0460159	8.844	0.861233	1.06708	32.0696	121.028	29.5406	125.64	0.186308	0.00778967	0.00607392	0.0846591	0.0567598	0.00855347	0.0078526	0.0790744	0.0609756	43.2548	37.0237	125.367	40.2963	113.42	0.527421	28.6681	15.1201	0.751359	371.713	114.679	65	0.790184	13.0785	10.3344	0.966355	121.401
1	Capan1	Control	0	8.62849	1.18693	1.0841	38.5394	107.948	26.0063	88.4851	0.162996	0.00449383	0.00355921	0.103281	0.0580595	0.00464317	0.00445079	0.081757	0.0588325	58.016	43.2547	114.346	44.1536	99.5732	0.521818	24.7558	12.918	0.818866	284.104	108.112	83.5052	0.776114	13.3156	10.3344	0.996832	118.898
1	Capan1	Control	0	10.7288	1.05419	0.947353	17.6205	69.7654	42.9991	104.556	0.107081	0.000513446	0.000597828	0.100274	0.0550609	0.00177656	0.00151751	0.0841087	0.0584995	42.3312	36.2867	102.754	18.7358	73.6425	0.467901	25.4537	11.9098	0.809959	241.551	92.2955	82.2222	0.762362	15.6222	11.9098	0.945223	166.875
1	Capan1	Control	0	8.22091	0.959979	0.950999	21.1321	72.875	36.9141	112.344	0.134122	0.00120173	0.00139052	0.106105	0.0518691	0.00362635	0.00308067	0.0622427	0.0410898	38.798	32.4422	107.11	27.526	76.6299	0.532981	20.8497	11.1125	0.798603	211.514	93.7861	85.8824	0.609131	13.5793	8.27156	0.926841	105.548
1	Capan1	Control	0	9.30192	0.84717	1.28766	119.58	271.315	61.0614	151.39	0.196335	0.00996511	0.00764183	0.0882526	0.0541736	0.00761526	0.00691747	0.0701524	0.0576262	75.5451	69.686	157.203	107.189	210.704	0.542387	33.3437	18.0852	0.803477	478.096	95.4894	61.2403	0.677439	17.162	11.6262	0.912559	186.483
1	Capan1	Control	0.0848656	17.1372	0.865299	1.1023	69.2133	167.265	91.6192	180.387	0.250354	0.0109669	0.00832722	0.154561	0.0786993	0.0109095	0.00944651	0.0823347	0.0590401	67.5463	85.2866	160.148	82.425	151.742	0.344748	35.548	12.2551	0.632043	294.951	132.813	52.8455	0.635999	13.6253	8.66566	0.938873	103.88
1	Capan1	Control	0	10.9358	1.22057	1.01734	76.4232	199.51	46.3674	168.276	0.209174	0.0114975	0.00788153	0.0944945	0.0689596	0.0102963	0.00909259	0.0576296	0.0473431	67.6489	65.9451	195.465	72.5858	196.11	0.463428	24.9321	11.5542	0.680289	227.367	96.1148	54.4554	0.683678	13.6253	9.3153	0.908222	109.72
1	Capan1	Control	0	9.32029	0.742819	1.04086	33.2193	125.559	53.1996	143.132	0.155257	0.00795257	0.00516595	0.0829026	0.0702731	0.00818202	0.00657128	0.0897312	0.0576854	61.7255	63.8651	148.869	38.3314	120.63	0.505998	28.1985	14.2684	0.83385	341.259	107.89	64.7619	0.677263	15.7287	10.6525	0.912901	143.929
1	Capan1	Control	0.0580645	10.0129	0.897926	0.957524	56.9434	126.006	77.2867	169.243	0.179355	0.00744378	0.0062503	0.113624	0.0675555	0.00726659	0.00596017	0.104508	0.0646696	84.7727	88.2853	182.947	58.4436	131.595	0.48269	28.4489	13.732	0.825499	323.32	153.41	66.9903	0.699284	13.0625	9.13441	0.966397	108.886
1	Capan1	Control	0.0916569	7.9765	0.639255	1.13675	36.731	154.913	80.3403	199.284	0.210341	0.00776593	0.00679114	0.111685	0.0674145	0.00798484	0.00788246	0.158656	0.0834689	80.1382	82.16	161.947	45.8271	136.277	0.614114	26.6076	16.3401	0.844472	355.026	113.573	64.1509	0.669534	15.5553	10.4148	0.949992	144.347
1	Capan1	Control	0.0155039	18.7368	0.96356	1.07782	40.7301	95.2443	80.1261	101.344	0.659589	0.00766654	0.00749049	0.135478	0.0844646	0.00533995	0.00487836	0.0847443	0.0537416	39.739	44.5307	75.4982	37.1552	88.3671	0.212571	76.145	16.1862	0.382277	1237.79	188.907	43.9276	0.520683	19.377	10.0893	0.897937	171.881
1	Capan1	Control	0	10.7218	0.793933	1.20627	25.5174	62.8326	35.2919	89.5021	0.297828	0.00177917	0.00164276	0.137291	0.0865971	0.00336152	0.00291094	0.0508224	0.0428162	25.3013	28.8005	77.9381	27.0899	52.0882	0.425341	39.9467	16.991	0.650034	595.326	122.686	38.1503	0.539529	18.2345	9.83806	0.938386	150.604
1	Capan1	Control	0.0294389	12.0883	0.907473	1.15872	20.3996	116.957	45.4621	127.056	0.274149	0.00930036	0.00871415	0.103782	0.0840932	0.00634276	0.00521601	0.0832676	0.0630656	81.9433	71.2499	141.251	28.4326	100.936	0.394791	37.0197	14.615	0.612142	453.482	115.297	54.4304	0.771035	15.0787	11.6262	0.949797	148.936
1	Capan1	Control	0	9.44994	0.945254	0.975595	31.9575	106.865	77.0402	168.776	0.163498	0.00227589	0.00203738	0.0884849	0.0567295	0.00382691	0.00276889	0.0923225	0.057219	77.4029	78.131	161.763	33.5248	109.538	0.524097	27.8861	14.615	0.718687	329.16	115.464	91.453	0.844317	14.5148	12.2551	0.986144	158.531
1	Capan1	Control	0.036839	10.6857	1.08422	1.1904	42.4036	112.899	68.9895	124.105	0.243018	0.00532868	0.00451781	0.0953511	0.0738653	0.00468899	0.00449091	0.103245	0.0645638	68.572	53.7343	119.241	39.5319	94.8412	0.481878	43.309	20.8697	0.713694	702.125	130.838	58.6207	0.8	16.4673	13.1738	0.995222	181.893
1	Capan1	Control	0.0124748	8.75654	0.902483	1.24863	27.8522	89.268	36.9472	90.9175	0.333199	0.00417621	0.00375737	0.113207	0.0814475	0.00383835	0.00318245	0.0809354	0.0543403	48.1235	44.9169	97.2251	29.2259	71.4925	0.543004	47.6392	25.8683	0.612036	1036.71	125.192	55.3719	0.752914	16.1862	12.1868	1.00692	169.378
1	Capan1	Control	0	10.4499	0.9241	1.19828	34.2752	131.847	55.9421	159.448	0.262789	0.00422154	0.00339298	0.0879446	0.0608576	0.00478425	0.00412974	0.0666749	0.0487266	53.6455	58.7624	169.895	36.3161	110.031	0.492432	39.4369	19.42	0.687572	595.326	111.823	87.8788	0.73799	16.606	12.2551	0.937211	174.384
1	Capan1	Control	0	9.82559	0.909626	1.12594	23.6595	103.713	10.9527	50.2592	0.253681	0.00748265	0.00590799	0.110635	0.0821765	0.00540541	0.00435089	0.0761239	0.0618152	22.6482	15.215	54.7517	31.8675	92.1121	0.531185	42.5412	22.5973	0.845775	736.752	113.024	42.8571	0.718812	16.9541	12.1868	0.946254	182.311
1	Capan1	Control	0	9.55056	0.865624	1.1894	33.7912	115.502	40.9002	85.7181	0.266854	0.00591725	0.00521231	0.0971508	0.0677587	0.00762495	0.00733646	0.10981	0.0592273	55.2356	71.8526	117.013	32.1661	97.1095	0.509902	37.6621	19.204	0.681808	594.074	136.961	63.8554	0.872172	13.973	12.1868	0.981098	152.273
1	Capan1	Control	0	8.23452	1.00642	1.15455	36.2975	102.522	28.9048	74.5719	0.232543	0.00508521	0.00422542	0.114197	0.0757936	0.0055993	0.00511973	0.0716681	0.0548389	37.8569	30.9986	82.9522	35.523	88.798	0.520922	36.1069	18.8089	0.773585	633.29	136.523	63.6364	0.851654	15.2438	12.9824	0.992979	170.629
1	Capan1	Control	0	7.6373	1.00308	0.968162	28.1195	85.671	37.675	95.7264	0.192926	0.00335549	0.00259162	0.125529	0.0790665	0.00408999	0.00321731	0.0885232	0.0630712	31.997	33.4976	91.6245	34.5552	88.4883	0.561478	35.1941	19.7607	0.790662	648.725	163.941	81.6993	0.614613	17.9579	11.0371	0.856223	186.483
1	Capan1	Control	0	10.3756	0.970019	1.18752	42.2109	106.965	28.6987	69.4	0.329663	0.00702007	0.00649786	0.123279	0.0832194	0.00438663	0.00374095	0.0936382	0.05147	36.913	33.8777	78.0594	35.0943	90.0742	0.385764	40.8758	15.7684	0.587578	644.136	162.266	58.1633	0.83891	15.2438	12.7882	0.960832	166.458
1	Capan1	Control	0	13.8895	0.94388	1.01096	28.1006	98.9037	44.5778	87.2236	0.35428	0.00714288	0.00602812	0.104187	0.0758928	0.00659789	0.00576563	0.0909983	0.0619614	40.8231	38.0946	89.4706	30.2453	97.8316	0.339771	51.7124	17.5704	0.564952	770.127	145.824	57.6577	0.807057	14.7571	11.9098	0.98432	153.108
1	Capan1	Control	0	9.80282	1.1444	1.00596	15.5063	81.5613	28.5473	79.9151	0.151408	0.00166616	0.00128553	0.0884068	0.0604071	0.00191441	0.0017351	0.077161	0.0452647	24.5037	23.9623	78.637	20.2275	81.0783	0.528861	29.5142	15.6089	0.776541	355.443	149.858	94.7368	0.747409	15.5553	11.6262	1.00463	163.537
1	Capan1	Control	0.0190511	8.54987	1.12119	1.24648	16.9826	91.3529	26.5373	63.0476	0.285021	0.00377281	0.00306483	0.119651	0.0796043	0.00437163	0.00343	0.096362	0.063208	62.1989	51.1129	88.0597	25.6245	73.289	0.528793	48.8584	25.836	0.659656	1116.81	162.649	61.0169	0.876537	14.5148	12.7228	0.990796	159.783
1	Capan1	Control	0	11.4725	1.01486	1.06385	27.9084	91.24	25.1936	86.9289	0.23489	0.00327548	0.00253745	0.1088	0.0678055	0.00348016	0.00263638	0.0833082	0.0592797	22.3915	22.4322	92.3873	28.4035	85.764	0.371391	41.7393	15.5016	0.721643	607.424	164.342	85.625	0.860979	15.0787	12.9824	0.987946	174.384
1	Capan1	Control	0	13.0624	0.995134	1.02013	30.5171	97.6503	29.6068	109.515	0.240929	0.0023161	0.00223743	0.109707	0.0665916	0.00443611	0.00336293	0.081576	0.0580198	30.8117	32.051	107.517	29.8554	95.7232	0.347691	30.6377	10.6525	0.66059	287.442	186.048	88.0342	0.537484	12.2551	6.58691	0.884596	80.9342
1	Capan1	Control	0.00664622	13.3027	1.09065	1.18218	32.5633	115.866	39.1852	110.457	0.289877	0.00276994	0.00229308	0.0864974	0.0601658	0.00433526	0.00366693	0.0812582	0.0593506	45.8534	44.1983	117.812	32.2344	98.0109	0.350688	52.0941	18.2688	0.579401	816.017	154.492	86.6071	0.685994	15.9787	10.9613	0.930904	162.703
1	Capan1	Control	0	9.74734	1.13088	1.0988	31.9085	97.4286	29.7698	82.4545	0.217656	0.0033865	0.00258738	0.0947464	0.0647877	0.00320579	0.00277986	0.100278	0.0650464	24.0865	25.4769	85.0351	29.8803	88.6678	0.474193	36.549	17.3313	0.693442	548.183	176.236	93.6306	0.73836	16.5052	12.1868	0.982798	167.709
1	Capan1	Control	0.00552486	9.60958	1.13038	1.05015	29.9223	90.9214	29.8516	100.611	0.186924	0.00140941	0.00118634	0.0873797	0.0627839	0.00449167	0.00381679	0.072259	0.0468564	34.1155	33.7238	115.341	32.1992	86.5792	0.526784	32.9915	17.3794	0.778058	453.065	158.696	88.3721	0.8144	15.6222	12.7228	0.977434	176.47
1	Capan1	Control	0.0388787	7.55515	0.995066	1.06184	43.1172	122.714	45.0342	134.541	0.169078	0.00330897	0.00248367	0.114159	0.0812592	0.00493416	0.0045623	0.0947344	0.0582917	49.6649	52.9848	132.268	47.5704	115.567	0.568858	29.5212	16.7934	0.779581	461.409	148.495	84.6154	0.6791	18.8311	12.7882	0.93951	201.084
1	Capan1	Control	0	13.6271	1.24173	1.15307	24.0165	82.5017	41.4035	78.2508	0.219162	0.00203768	0.00167741	0.133359	0.0738287	0.00350313	0.00256885	0.0829652	0.0523847	58.5285	50.2919	96.9323	26.1465	71.5496	0.36705	49.772	18.2688	0.709732	727.157	199.185	87.0787	0.784465	16.9541	13.2999	0.991986	197.329
1	Capan1	Control	0.0058997	8.69223	1.04729	1.01653	53.1343	141.433	64.9994	157.24	0.170108	0.00305694	0.00238938	0.0863968	0.0587952	0.00372055	0.00329967	0.089081	0.0537033	56.2659	57.6897	163.809	47.403	139.134	0.559573	30.3642	16.991	0.871995	424.279	191.815	91.1504	0.711325	15.6222	11.1125	0.985927	153.525
1	Capan1	Control	0	6.81048	0.982576	1.0615	24.8454	110.097	74.5029	169.335	0.138675	0.00317904	0.00245754	0.118559	0.0686099	0.00464947	0.00415674	0.075125	0.0491977	58.761	63.9221	161.899	31.0436	103.718	0.619444	21.4707	13.2999	0.914452	270.754	230.358	94.186	0.75199	14.1657	10.6525	1.00767	134.751
1	Capan1	Control	0	14.1956	1.10601	1.18193	35.3978	110.669	48.4767	100.146	0.274143	0.00353304	0.00299735	0.0977445	0.0752914	0.00333008	0.00285301	0.082671	0.0502165	42.3533	40.9602	103.731	34.7361	93.6335	0.335201	48.7473	16.3401	0.684285	669.585	320.26	72.7273	0.77079	16.843	12.9824	0.976914	186.9
1	Capan1	Control	0	10.8027	0.966951	1.10851	32.155	126.155	63.6854	162.894	0.283673	0.00392323	0.00325899	0.0968345	0.0594148	0.00470128	0.00337755	0.0782958	0.0573881	65.238	60.879	168.531	39.1807	113.805	0.425864	40.6968	17.3313	0.747596	613.265	233.702	79.4872	0.853282	13.6253	11.6262	0.995594	141.426
1	Capan1	Control	0	9.92738	0.965711	1.01197	39.2168	133.508	49.7222	135.442	0.162905	0.00553825	0.00540016	0.0941054	0.0661597	0.00524008	0.00438766	0.104127	0.0618889	67.0433	62.4081	140.66	50.171	131.928	0.444642	32.4818	14.4428	0.748774	425.113	209.632	71.3178	0.688186	16.1475	11.1125	0.916384	158.531
1	Capan1	Control	0	6.91249	1.07298	0.977907	41.169	128.328	50.1772	138.9	0.134189	0.00184911	0.00181628	0.105092	0.0619628	0.00304193	0.00265197	0.0694828	0.0434111	58.3865	46.5162	132.764	40.0931	131.227	0.69725	24.8567	17.3313	0.896494	357.529	224.908	85.1485	0.873128	13.3156	11.6262	0.999117	142.261
1	Capan1	Control	0.0297985	9.26906	1.06641	0.950016	34.4574	110.752	44.229	155.231	0.186678	0.00354927	0.00306952	0.0859351	0.0578703	0.00526713	0.00467904	0.0809335	0.0551429	47.7408	44.1827	149.883	33.2205	116.579	0.47478	33.2121	15.7684	0.787212	476.01	216.321	80.1527	0.761926	15.3529	11.6977	0.972441	159.783
1	Capan1	Control	0	8.20225	1.25628	1.04415	53.7691	140.046	33.7785	98.0287	0.157303	0.00429189	0.00296142	0.105408	0.0549922	0.00199086	0.00160866	0.0749756	0.0371845	60.7383	47.2388	107.937	49.607	134.124	0.546471	24.6798	13.4868	0.83116	297.037	252.577	88.7755	0.809239	13.732	11.1125	0.956068	132.248
1	Capan1	Control	0	7.13489	1.03812	1.02214	41.7393	156.471	62.2536	218.202	0.219621	0.00321673	0.00236773	0.0810876	0.0630539	0.00388517	0.00355135	0.0647495	0.0420927	77.819	67.8193	218.562	44.6234	153.083	0.618466	25.836	15.9787	0.84374	374.217	218.066	89.9083	0.719271	16.2633	11.6977	0.946747	172.298
1	Capan1	Control	0	9.59416	0.859564	1.06552	31.7083	90.7532	28.975	141.843	0.264589	0.0020079	0.0017115	0.0868628	0.0620373	0.00451291	0.00400633	0.0574898	0.0519777	34.426	36.01	138.451	27.6046	85.1729	0.479609	38.8454	18.6306	0.705922	629.118	232.477	63.8554	0.810998	15.7684	12.7882	0.933157	173.133
1	Capan1	Control	0	7.72425	0.939924	1.16167	210.336	191.82	78.4201	173.696	0.180666	0.00245298	0.00192504	0.121693	0.0668158	0.00424096	0.00363392	0.0595203	0.0421556	101.628	79.9963	163.852	164.903	165.124	0.60228	31.8855	19.204	0.773985	526.49	289.38	76.4286	0.59834	19.4308	11.6262	0.815805	204.422
1	Capan1	Control	0	8.39752	1.21165	0.999881	32.1267	103.373	55.0096	139.968	0.11677	0.00104381	0.00100117	0.0999043	0.0665046	0.00367176	0.00293357	0.0784904	0.0545537	66.416	57.8831	141.368	41.0948	103.385	0.537362	26.5527	14.2684	0.807976	335.835	289.953	76.6355	0.598849	17.3914	10.4148	0.903857	168.961
1	Capan1	Control	0.0144566	11.6869	0.902453	1.27744	73.117	156.713	50.3389	108.528	0.317049	0.00761835	0.00630944	0.135764	0.0740434	0.00612709	0.00550507	0.0858794	0.057696	49.3286	64.172	102.032	84.357	122.677	0.413061	49.4483	20.4252	0.654252	836.877	149.148	50.2439	0.785628	16.7685	13.1738	0.980805	188.151
1	Capan1	Control	0.0863016	17.3699	0.888918	1.24105	300.347	278.895	107.742	338.928	0.317808	0.00480166	0.00412363	0.117364	0.0568035	0.00464412	0.00387912	0.104995	0.0683221	125.962	113.403	280.892	212.141	224.726	0.277438	36.3659	10.0893	0.575698	304.546	426.708	81.4815	0.77746	9.6885	7.53242	0.999556	65.9155
1	Capan1	Control	0.0216632	14.5912	0.927077	0.968066	72.2803	153.884	47.5808	115.591	0.190077	0.00570849	0.00528898	0.109039	0.0717628	0.0033737	0.00303325	0.0975302	0.0597267	52.8533	60.6557	129.229	96.4734	158.96	0.313184	46.666	14.615	0.724755	596.994	336.361	66.4557	0.733879	16.606	12.1868	0.976054	176.053
1	Capan1	Control	0	9.41459	1.4399	1.07232	27.7904	147.131	38.6817	132.073	0.190212	0.00323646	0.00282774	0.0786041	0.0567092	0.00291286	0.00245441	0.0780523	0.0502951	180.555	123.546	184.664	36.7278	137.208	0.516499	32.61	16.843	0.688208	451.813	300.928	85.3147	0.663527	17.6296	11.6977	0.91596	172.715
1	Capan1	Control	0	6.4894	1.01957	0.971294	54.9218	191.919	154.761	320.497	0.105973	0.00428152	0.00351029	0.103046	0.0631046	0.00355344	0.00205886	0.0852956	0.0536428	261.203	187.954	331.691	59.8363	197.592	0.709622	18.7422	13.2999	0.951442	216.52	320.232	90.5405	0.686406	13.1738	9.0426	0.979612	107.217
1	Capan1	Control	0	7.92677	0.922211	0.898044	52.8966	121.275	51.4553	162.088	0.102975	0.00499141	0.00391489	0.105844	0.0775568	0.00492542	0.00475316	0.0823751	0.0596745	52.9023	49.7424	156.797	57.0324	135.043	0.560435	19.0075	10.6525	0.818792	182.311	275.797	80.5195	0.640184	14.2684	9.13441	0.904032	124.739
1	Capan1	Control	0	8.60892	1.03451	1.01171	32.2605	149.889	26.6861	140.889	0.102362	0.00174159	0.00108825	0.074769	0.078583	0.00418797	0.00298707	0.0945973	0.0706238	57.8621	49.1581	166.609	36.7708	148.155	0.488901	18.4958	9.0426	0.751791	158.948	301.427	92.2078	0.356131	18.4958	6.58691	0.816961	113.058
1	Capan1	Control	0	6.3959	0.909653	0.924234	68.5839	143.634	39.1498	141.103	0.100683	0.00256647	0.00220063	0.11136	0.0530188	0.00421461	0.00347469	0.0893312	0.0554586	55.3491	42.4816	146.806	76.2063	155.409	0.764752	19.7713	15.1201	0.872019	244.471	244.571	85.8824	0.730956	15.2027	11.1125	0.954964	145.598
1	Capan1	Control	0	21.7439	1.10774	0.93602	55.107	194.59	121.298	176.311	0.293794	0.0127745	0.0121665	0.119216	0.0783584	0.00862825	0.00753694	0.109824	0.0612048	139.353	111.23	164.218	102.651	207.891	0.265556	53.7302	14.2684	0.56947	531.079	315.726	40.1099	0.77658	16.4673	12.7882	0.940044	190.654
1	Capan1	Control	0	8.46392	1.01496	0.891704	96.8481	185.482	43.6182	150.821	0.103093	0.00848911	0.00672753	0.173957	0.0935602	0.00807541	0.00699668	0.0747512	0.0586464	58.4713	51.6881	179.243	110.623	208.009	0.558404	18.507	10.3344	0.880588	161.868	309.756	70.5882	0.690221	13.6253	9.40445	0.971122	113.892
1	Capan1	Control	0	9.2609	1.1671	1.10436	59.0405	193.467	45.1881	118.869	0.229533	0.00299984	0.00229733	0.0923079	0.0599123	0.00287132	0.00236129	0.0777958	0.0549214	57.489	53.3156	125.362	56.9563	175.185	0.506403	35.5304	17.9927	0.746732	545.263	292.134	88.4354	0.758473	19.269	14.615	0.975563	237.796
1	Capan1	Control	0	16.7597	1.03113	1.28386	152.683	304.656	73.0216	198.875	0.235294	0.0127477	0.00963118	0.141364	0.0931288	0.0103524	0.00900747	0.0942252	0.0855479	79.7478	64.5261	175.252	135.95	237.297	0.330311	32.2498	10.6525	0.634632	248.226	341.57	48.2143	0.742781	12.5411	9.3153	0.959583	107.634
1	Capan1	Control	0	12.4567	0.859656	1.38998	106.665	171.079	38.5999	115.502	0.304659	0.0101052	0.00870436	0.104639	0.0701441	0.00969664	0.00894786	0.0710092	0.0564953	55.5184	43.0118	109.262	88.6151	123.08	0.401412	50.3719	20.2199	0.712785	814.766	105.829	13.2979	0.791972	16.7934	13.2999	0.990742	196.912
1	Capan1	Control	0.0278979	13.1536	0.906042	1.08217	37.4344	90.5012	39.6657	106.695	0.326523	0.00641125	0.00600478	0.0898111	0.0675367	0.00750599	0.00700681	0.0750809	0.0547722	47.8977	44.3193	119.509	37.952	83.6295	0.429523	59.0884	25.3798	0.627174	1061.74	103.126	38.75	0.786752	16.9048	13.2999	0.971605	201.501
1	Capan1	Control	0.0107939	10.4095	0.827434	1.40374	30.509	107.122	68.5916	117.57	0.292479	0.00505337	0.00424362	0.104141	0.0737986	0.00380506	0.0031926	0.0582856	0.0457071	47.0749	46.6963	86.3341	26.8704	76.312	0.464991	55.8395	25.9649	0.698432	1198.16	94.3888	46.7811	0.672687	19.7713	13.2999	0.949049	232.79
1	Capan1	Control	0.00223547	12.6274	0.858276	1.2748	31.1337	114.255	45.0257	91.7	0.42921	0.00643498	0.00566355	0.12168	0.0768337	0.00396894	0.00355941	0.0801271	0.0569235	52.0262	43.4604	85.209	34.153	89.6255	0.432919	59.4544	25.7389	0.550329	1119.73	74.8137	39.2727	0.777332	18.2802	14.2098	0.922055	227.367
1	Capan1	Control	0	10.7384	0.986039	1.28029	43.7039	117.192	27.7512	79.6096	0.224579	0.0046395	0.00383732	0.0981389	0.0801375	0.00428655	0.0041387	0.0762783	0.0567588	37.2021	31.4633	77.7661	40.5521	91.536	0.483053	45.3834	21.9226	0.847135	767.207	121.063	41.4013	0.812456	17.1984	13.973	0.980649	216.103
1	Capan1	Control	0.0103166	11.5005	1.07444	1.19111	27.3866	126.427	25.6167	58.8012	0.251868	0.00618467	0.00546776	0.106694	0.07373	0.00606782	0.0054268	0.070609	0.0485357	64.1803	56.3729	92.2723	34.836	106.142	0.438214	58.0664	25.4455	0.761159	1172.71	114.13	46.2617	0.741009	20.9196	15.5016	0.968318	272.006
1	Capan1	Control	0	7.21896	1.00266	1.15276	29.8243	109.297	56.2213	91.7105	0.278047	0.00380321	0.00296977	0.0975704	0.0693749	0.0028164	0.00230944	0.0743231	0.0528873	50.433	39.1445	96.9436	29.1918	94.8129	0.558504	51.3562	28.6826	0.70106	1461.41	94.427	63.4241	0.812794	19.204	15.6089	0.913176	264.079
1	Capan1	Control	0	7.04673	1.25499	1.24064	34.096	105.032	21.8672	69.1959	0.205967	0.00313919	0.00270237	0.111364	0.0769132	0.0023435	0.00214091	0.0678708	0.0476909	56.0971	43.7295	94.9955	34.2341	84.6594	0.664487	45.2176	30.0465	0.786072	1160.61	98.5775	78.2609	0.858163	18.1887	15.6089	0.965081	239.465
1	Capan1	Control	0.0239643	18.0357	0.897173	1.18209	25.6671	99.3284	43.9081	85.9003	0.328188	0.00503165	0.00435997	0.108085	0.0703823	0.00468101	0.00394835	0.0955185	0.0608612	33.2929	40.7956	92.7804	31.4091	84.0281	0.332055	68.0529	22.5973	0.566138	1027.11	196.961	71.5953	0.78397	18.2002	14.2684	0.974103	225.281
1	Capan1	Control	0	9.17889	1.25744	1.09154	25.3373	103.456	22.1256	67.7647	0.195015	0.0075261	0.00693057	0.146317	0.0904028	0.0030882	0.00304989	0.0921434	0.0637556	25.2939	23.7486	71.4723	30.0584	94.7797	0.577535	36.1358	20.8697	0.797438	569.043	153.824	71.1268	0.779391	17.0645	13.2999	0.96681	199.832
1	Capan1	Control	0.00628365	10.5805	0.905955	1.33139	28.0637	116.466	31.1437	67.6761	0.276182	0.00507183	0.00433441	0.115986	0.0829243	0.00493344	0.0041569	0.101735	0.0661596	43.1611	36.5233	83.2352	33.3522	87.4767	0.525374	60.7283	31.9051	0.734653	1394.24	137.847	48.5477	0.859583	19.1278	16.4419	0.993812	264.496
1	Capan1	Control	0	8.27549	1.21769	1.05587	29.1881	84.9039	20.7732	91.2751	0.160107	0.00368687	0.00285847	0.117074	0.0788994	0.00293252	0.00263177	0.0676452	0.0444345	39.7183	31.5641	99.1388	30.2923	80.4117	0.649587	31.0637	20.1786	0.860628	466.415	158.392	78.3333	0.841438	16.606	13.973	1.00558	201.918
1	Capan1	Control	0.00426569	14.8714	1.01021	1.07404	26.1404	105.071	29.7644	79.8252	0.250457	0.00542762	0.00439304	0.103145	0.0735892	0.00490362	0.00366399	0.0743375	0.0551061	34.2625	31.7074	88.216	34.1365	97.8276	0.390008	50.4505	19.6761	0.621656	684.604	161.148	70.4663	0.780869	18.4958	14.4428	0.988276	224.864
1	Capan1	Control	0	8.21559	1.32482	1.08201	33.1573	124.893	42.9548	133.195	0.213501	0.00358418	0.00305893	0.109163	0.0718736	0.00267051	0.0024895	0.0765205	0.0535971	78.6631	68.2856	160.974	35.4423	115.427	0.619842	40.4655	25.0822	0.790831	797.244	131.432	81.1765	0.769415	20.4252	15.7154	0.961905	275.343
1	Capan1	Control	0.019307	8.08317	1.12104	1.23745	28.486	120.173	28.8157	110.942	0.222277	0.00265849	0.00198526	0.0871759	0.0655604	0.00399838	0.00338689	0.0698514	0.0480832	67.0033	71.1751	160.476	33.8591	97.1136	0.531239	41.2669	21.9226	0.649511	842.717	125.52	86.4734	0.826172	18.2345	15.0648	0.964386	233.207
1	Capan1	Control	0	6.78431	0.96498	0.927573	27.6505	71.8364	47.6683	100.255	0.122549	0.00264089	0.00187976	0.0933835	0.065081	0.00330457	0.00228702	0.103283	0.0643101	40.0942	47.2428	102.728	30.1338	77.4455	0.645124	24.0289	15.5016	0.841905	340.424	185.118	85.5769	0.782154	17.8647	13.973	0.996433	210.262
1	Capan1	Control	0.00792709	7.33413	1.26411	1.31892	50.2234	136.624	42.1287	64.0095	0.242172	0.00497672	0.00440015	0.139144	0.0824062	0.00393135	0.00363113	0.0873698	0.0565027	35.218	32.9438	64.0587	48.9841	103.587	0.693993	43.9307	30.4876	0.785806	1052.56	203.452	49.2386	0.855998	16.6687	14.2684	0.973902	213.6
1	Capan1	Control	0	6.96019	0.939025	1.23923	40.4447	115.6	28.2083	104.949	0.206273	0.00388315	0.00315343	0.113798	0.077402	0.00273147	0.00222262	0.0817631	0.049977	39.0712	32.8857	104.448	35.453	93.2838	0.642784	34.6927	22.2999	0.791308	691.696	155.648	84.1772	0.673186	18.9965	12.7882	0.915453	197.747
1	Capan1	Control	0.0132678	14.5396	1.20519	1.08469	39.0436	98.6697	25.6733	60.3211	0.207862	0.00451325	0.00419082	0.113114	0.0720143	0.0026147	0.00210222	0.100255	0.0601539	32.9651	29.4548	68.9219	32.8993	90.9657	0.345699	55.5512	19.204	0.739664	848.975	210.944	82.7957	0.678363	20.598	13.973	0.967068	240.3
1	Capan1	Control	0	11.1455	1.21526	1.09296	28.9968	81.1418	31.405	93.9923	0.224174	0.00242961	0.00203509	0.0915656	0.0673569	0.00489693	0.00452037	0.0759847	0.0544864	55.8146	54.7708	122.396	24.7653	74.2405	0.392875	40.6712	15.9787	0.696345	593.657	233.379	87.7301	0.845431	15.9526	13.4868	1.01406	187.734
1	Capan1	Control	0	9.89634	1.00067	1.2146	46.8222	113.997	37.219	87.5159	0.305908	0.005046	0.00453657	0.123673	0.0788365	0.00449254	0.00408068	0.0994036	0.0616041	52.0429	40.2305	98.9015	38.071	93.8554	0.503722	53.364	26.8806	0.564797	1151.02	227.353	63.37	0.759944	18.7756	14.2684	0.929356	236.128
1	Capan1	Control	0.0124224	12.4099	1.30948	1.08015	25.2904	92.7421	31.35	82.0287	0.208592	0.00336164	0.00287158	0.0890341	0.0652225	0.00263896	0.00204755	0.0927175	0.0619469	55.6419	44.9728	95.0789	26.2977	85.86	0.404347	50.0062	20.2199	0.67435	806.005	212.712	85.7143	0.805089	19.3878	15.6089	0.984219	266.582
1	Capan1	Control	0.00794552	9.97503	1.19349	1.3452	28.5543	92.9012	24.7314	48.6214	0.243473	0.0034558	0.00274492	0.120436	0.0818722	0.00355105	0.00333019	0.0786031	0.0564535	26.9735	30.711	70.4543	29.7962	69.0614	0.533792	42.8149	22.8543	0.80842	735.083	164.551	66.25	0.797077	16.0438	12.7882	0.981565	177.722
1	Capan1	Control	0.0316742	8.94922	0.955864	1.08906	35.3486	125.37	62.9225	150.741	0.215184	0.00288847	0.00245268	0.10027	0.0720583	0.00407987	0.00327879	0.104115	0.0618388	73.4172	69.0907	151.497	34.6112	115.118	0.510563	43.0869	21.9986	0.650876	829.785	222.537	86.3415	0.78616	18.3713	14.4428	0.983935	223.195
1	Capan1	Control	0.031503	8.32403	1.0587	0.960964	28.9596	105.081	82.8085	205.02	0.165617	0.00174866	0.00111443	0.0931384	0.0553524	0.00383672	0.00334699	0.102634	0.068359	89.8282	93.2494	215.275	30.2562	109.35	0.647059	31.057	20.0957	0.874136	463.495	204.553	88.9831	0.790076	18.2802	14.4428	0.953089	228.618
1	Capan1	Control	0	15.7312	1.049	1.09182	34.006	119.24	34.1363	78.0726	0.403242	0.00716436	0.00677854	0.106386	0.0769321	0.00562589	0.00506412	0.080875	0.0542221	44.7309	38.9932	95.5393	46.4905	109.212	0.371135	69.7004	25.8683	0.555456	1235.29	194.182	48.7805	0.794861	19.7713	15.7154	0.977517	269.92
1	Capan1	Control	0	7.06494	1.04991	1.19237	39.374	98.8012	51.9024	115.043	0.186402	0.00357281	0.0031956	0.0981011	0.0731141	0.00336183	0.0025373	0.0944323	0.0597639	45.5246	45.1955	112.804	40.5003	82.8616	0.647059	31.057	20.0957	0.804327	546.098	261.35	72.4638	0.833897	16.4673	13.732	0.989496	196.495
1	Capan1	Control	0	16.1851	1.11596	0.810807	17.1586	60.6114	41.55	84.9793	0.248347	0.00275924	0.00205882	0.0969449	0.0651886	0.00113667	0.00115068	0.0702985	0.0444365	34.499	35.5587	84.399	26.0307	74.7544	0.382829	42.2806	16.1862	0.61632	441.801	181.507	88.3871	0.86421	15.2438	13.1738	0.966471	183.562
1	Capan1	Control	0.0150111	10.9227	1.1587	1.29067	24.9985	103.463	37.3296	78.5864	0.230464	0.00398227	0.00354214	0.114976	0.0808016	0.00493519	0.00433247	0.0876008	0.0575351	46.1761	43.9477	88.4014	28.883	80.1621	0.47304	50.7967	24.0289	0.699934	944.928	263.956	85.4369	0.838133	16.9541	14.2098	1.00935	209.011
1	Capan1	Control	0.0510122	7.93522	0.940338	0.994648	29.5594	116.131	56.0659	201.974	0.173279	0.0020209	0.00182268	0.0881197	0.0662013	0.00336784	0.00302632	0.0803258	0.0508175	53.934	58.7649	201.454	37.5767	116.756	0.574279	31.9704	18.3599	0.790205	515.226	212.576	88.2353	0.787839	17.7358	13.973	0.98624	218.189
1	Capan1	Control	0	9.11099	1.21608	1.06843	23.4889	101.167	31.3	89.6492	0.186744	0.00417641	0.00360306	0.105527	0.071474	0.00317356	0.00281872	0.0790984	0.0553435	38.9424	33.4805	91.726	28.6367	94.6872	0.530806	42.502	22.5603	0.710177	793.072	191.13	87.6344	0.632456	21.3245	13.4868	0.93609	244.889
1	Capan1	Control	0.00343053	14.2887	0.989358	1.04734	29.1428	98.839	7.18242	33.8801	0.301397	0.00429271	0.00355167	0.126085	0.0819413	0.00282046	0.00248224	0.0827156	0.059219	34.1063	26.0923	50.8706	32.0481	94.3714	0.326285	77.9856	25.4455	0.572049	1702.54	239.01	71.8182	0.807903	24.0375	19.42	0.94533	383.812
1	Capan1	Control	0	8.22736	0.952932	1.05255	26.7644	125.607	90.6914	168.682	0.171183	0.00164344	0.00146869	0.0840953	0.0660085	0.00366575	0.00300314	0.0797295	0.0497184	72.6293	86.6285	174.102	31.1207	119.336	0.542535	36.0317	19.5485	0.754957	631.204	222.756	85.3503	0.854626	17.1011	14.615	0.97081	218.189
1	Capan1	Control	0	11.5517	1.03764	1.01934	68.4643	129.961	41.3955	153.965	0.218914	0.00537143	0.0041972	0.100114	0.0697781	0.00339536	0.00312602	0.086423	0.0551829	55.4809	44.4003	151.231	84.3013	127.495	0.483819	37.0929	17.9463	0.677126	476.427	318.892	83.2215	0.872531	16.3529	14.2684	0.999801	205.673
1	Capan1	Control	0	15.5169	0.983169	0.991875	31.6843	108.753	56.5722	158.428	0.25098	0.003171	0.00269842	0.0781277	0.0582439	0.00387105	0.00335304	0.07817	0.0581327	53.7537	51.6674	149.37	33.2633	109.644	0.364187	45.4247	16.5431	0.665698	531.913	327.894	85	0.861626	16.1475	13.9131	1.00177	189.403
1	Capan1	Control	0	11.1559	1.31648	1.10738	25.7982	121.541	41.6771	96.4955	0.200948	0.00263809	0.00240952	0.0925052	0.0646591	0.0025455	0.00216099	0.0990361	0.0603866	59.0625	57.6262	111.626	33.3273	109.755	0.498243	44.3042	22.0743	0.734403	703.794	310.827	90	0.801669	18.0159	14.4428	0.995829	227.784
1	Capan1	Control	0	7.97905	1.06709	1.00416	29.4286	94.9729	18.672	72.7627	0.234832	0.00389721	0.00334986	0.112949	0.0685295	0.00360137	0.00299984	0.0839864	0.0525546	50.8944	42.5707	99.9734	34.0667	94.5796	0.48523	43.664	21.1871	0.712805	955.775	269.378	71.0784	0.742016	18.8311	13.973	0.984256	235.293
1	Capan1	Control	0.0207373	9.1828	1.15941	1.13593	71.0817	216.549	56.6114	159.867	0.211982	0.00446184	0.00366287	0.0884993	0.0640855	0.00291985	0.00271883	0.0804897	0.0541855	105.182	94.8483	184.464	71.5949	190.637	0.571429	35.3125	20.1786	0.769358	543.177	253.28	91.6084	0.846296	15.7154	13.2999	0.99389	186.9
1	Capan1	Control	0.050152	7.32725	1.34675	1.01004	57.2383	168.345	48.3577	116.873	0.223404	0.00515125	0.00462964	0.0962115	0.0711682	0.00525185	0.00489612	0.0839622	0.0512984	195.436	149.171	198.584	54.3102	166.671	0.653446	38.84	25.3798	0.790002	823.527	308.484	71.6763	0.684347	20.8497	14.2684	0.922831	244.889
1	Capan1	Control	0	11.1459	1.12353	1.02991	190.067	279.448	58.7007	138.711	0.167382	0.00713398	0.0051099	0.109797	0.0633638	0.0030545	0.00224312	0.0759624	0.0459464	84.1697	76.721	156.718	218.721	271.333	0.447472	32.9156	14.7288	0.671867	388.818	240.468	82.2222	0.793892	16.3529	12.9824	0.976958	192.323
1	Capan1	Control	0.00791895	15.7023	1.02141	1.37731	91.8567	185.463	47.956	101.653	0.460114	0.00574909	0.00513241	0.139716	0.0792773	0.00502296	0.00440458	0.0843616	0.0588071	55.5073	47.6037	87.8033	72.9323	134.656	0.317216	118.587	37.6178	0.479962	3582.38	315.22	46.3196	0.818853	18.9965	15.5553	0.980876	246.14
1	Capan1	Control	0	7.40419	1.11265	1.02747	59.6569	208.837	51.71	167.138	0.249251	0.00262141	0.0022237	0.0686464	0.053928	0.00273453	0.00189788	0.0621897	0.040341	73.3955	68.8302	175.829	55.5575	203.254	0.674173	32.1201	21.6545	0.774993	557.362	301.649	90.9722	0.753151	18.4732	13.9131	0.972869	230.704
1	Capan1	Control	0	6.49799	0.980717	0.918045	18.1776	87.9818	52.973	155.691	0.0983936	0.000947156	0.00084281	0.0925872	0.0467495	0.00223923	0.00213086	0.0666853	0.0428312	54.4096	49.1219	132.369	22.6034	95.8361	0.70667	18.3713	12.9824	0.914022	207.759	112.451	92	0.743573	15.6356	11.6262	0.979911	156.862
1	Capan1	Control	0.0203505	5.51724	0.69743	1.4981	150.636	294.922	54.2338	98.5187	0.325042	0.00748234	0.00522279	0.128371	0.0602304	0.00757517	0.0060475	0.0699938	0.0515584	34.9943	40.9211	81.7461	122.996	196.863	0.729923	31.9051	23.2883	0.859353	738.003	95.5149	18.4211	0.761042	13.5793	10.3344	0.909274	121.819
1	Capan1	Control	0	9.46307	0.861717	1.10028	46.692	128.529	33.9379	104.649	0.185229	0.00513326	0.00460553	0.114193	0.0772068	0.00462157	0.00440531	0.0648905	0.0438321	34.8615	33.5133	103.451	42.9694	116.814	0.537955	29.0152	15.6089	0.677718	355.86	81.0865	89.0625	0.714871	16.2633	11.6262	0.907087	146.85
1	Capan1	Control	0.0422536	9.78548	0.948157	0.968171	61.8966	127.366	67.4222	148.888	0.170098	0.0055039	0.0050051	0.188204	0.0600575	0.00888368	0.00747747	0.085602	0.0687958	57.8021	66.3844	148.857	59.7862	131.553	0.490837	30.6921	15.0648	0.806629	385.063	91.6127	66.9565	0.83205	13.973	11.6262	0.999117	142.261
1	Capan1	Control	0	11.9938	1.19511	1.16037	42.222	151.862	31.0152	136.074	0.194745	0.00272875	0.00213556	0.073794	0.0525456	0.00364453	0.00340781	0.0554715	0.0464982	75.1706	56.6815	157.414	44.9325	130.873	0.408669	28.4489	11.6262	0.793828	269.92	102.561	94.8454	0.755087	13.6864	10.3344	0.989557	121.819
1	Capan1	Control	0.0341034	9.76238	0.962625	1.09492	41.9709	144.199	28.9215	100.416	0.224422	0.00285271	0.00229178	0.0766473	0.0576878	0.00385552	0.00333814	0.0773768	0.0499438	57.3282	53.1477	123.315	39.6645	131.699	0.48134	43.0239	20.7091	0.732685	758.446	90.6484	85.8757	0.740233	16.5557	12.2551	0.931802	172.715
1	Capan1	Control	0	15.8555	1.11953	1.03972	96.8515	205.152	31.0256	92.7353	0.216681	0.00996879	0.00918535	0.17302	0.0778632	0.00736844	0.00588727	0.0984683	0.0743628	45.562	39.6134	93.7612	92.052	197.315	0.271575	43.8547	11.9098	0.653316	485.188	100.512	44.5161	0.595573	17.4871	10.4148	0.888641	168.961
1	Capan1	Control	0.0488599	6.2671	0.888415	1.16941	46.6909	186.991	54.3912	199.139	0.117264	0.00905482	0.00807382	0.0929881	0.0581031	0.00484116	0.00421501	0.0891293	0.0565386	69.0689	60.6996	183.629	60.6004	159.903	0.663889	20.0333	13.2999	0.861498	256.153	111.059	79.5455	0.815668	14.3413	11.6977	0.933596	144.764
1	Capan1	Control	0	10.7821	0.947079	1.12929	51.0213	154.145	39.9805	77.7699	0.334512	0.00562522	0.00455563	0.105514	0.0715672	0.00473436	0.00426164	0.0686777	0.0499936	32.7976	28.3895	73.7845	47.0863	136.497	0.442052	50.4464	22.2999	0.658066	944.094	103.703	56.2212	0.802746	14.5722	11.6977	1.00024	152.273
1	Capan1	Control	0	13.9605	0.841263	0.862782	33.5184	134.052	49.7487	175.615	0.199013	0.00156491	0.00157211	0.0761563	0.0587581	0.00391706	0.00349352	0.0803231	0.0581767	46.3967	52.886	139.725	44.1605	155.372	0.370953	29.7535	11.0371	0.711688	253.65	134.729	94.1748	0.818598	12.7228	10.4148	1.00317	120.15
1	Capan1	Control	0	12.5	1.03536	1.10063	43.7272	185.451	38.6092	115.979	0.208815	0.00478216	0.00386644	0.0823654	0.063111	0.00547605	0.00441203	0.078158	0.0509048	46.846	45.3528	127.334	66.7618	168.495	0.34001	42.4774	14.4428	0.670059	577.387	114.343	80.1205	0.725691	16.7934	12.1868	0.969905	179.39
1	Capan1	Control	0	10.2198	1.00775	1.28426	81.8246	279.812	27.4913	75.1376	0.238424	0.00827257	0.00630984	0.119331	0.0771766	0.00891369	0.00799429	0.0796176	0.0624834	43.6828	34.4518	90.119	92.3496	217.877	0.478931	39.2726	18.8089	0.819153	603.669	129.805	44.0559	0.843801	14.4428	12.1868	0.977866	151.439
1	Capan1	Control	0	10.8294	0.90163	0.937996	120.084	306.407	43.5036	119.96	0.152844	0.010996	0.00947121	0.143617	0.0845171	0.00637345	0.0053136	0.131793	0.0708447	68.3482	51.4116	126.721	124.02	326.661	0.47336	30.8751	14.615	0.831238	352.106	401.069	68.2243	0.769605	14.3413	11.0371	1.02677	143.929
1	Capan1	Control	0	9.09091	1.15237	0.989828	121.245	274.794	70.0512	145.144	0.247772	0.00837093	0.00677903	0.111138	0.0694257	0.00668036	0.00604119	0.0717563	0.0509453	116.263	97.6172	179.609	135.497	277.618	0.517409	39.9467	20.6688	0.781185	702.125	374.079	45.3416	0.831022	15.6222	12.9824	0.990761	175.218
1	Capan1	Control	0.0564739	10.6667	0.790272	0.920838	140.912	257.684	70.684	203.268	0.163912	0.00932134	0.00897605	0.281867	0.0763804	0.00983753	0.00902103	0.101322	0.079794	87.4436	75.4429	201.399	156.943	279.837	0.43122	28.4196	12.2551	0.775938	302.878	235.169	46.6667	0.657159	15.3529	10.0893	0.985124	134.334
1	Capan1	Control	0	14.8907	0.730983	1.13538	77.3101	234.149	61.9762	136.762	0.266486	0.00542341	0.00487237	0.100908	0.0618641	0.00678506	0.00623992	0.0701178	0.0449767	61.3945	60.1515	116.467	98.9388	206.229	0.396539	41.4636	16.4419	0.686124	461.826	191.1	61.3793	0.758947	16.1475	12.2551	0.969469	168.961
1	Capan1	Control	0	7.94908	1.01671	0.919071	32.4071	170.618	39.9651	127.405	0.149929	0.000531101	0.000560592	0.0837384	0.0455353	0.00430463	0.00356754	0.060644	0.0432516	35.6633	39.0948	126.388	42.3713	185.642	0.536232	24.2105	12.9824	0.77213	294.951	238.09	83.6538	0.823529	15.5285	12.7882	0.99153	170.212
1	Capan1	Control	0.0592369	9.31727	0.864179	1.30951	289.559	388.487	71.9577	183.603	0.188755	0.00385498	0.0039205	0.166189	0.0673471	0.00467255	0.00362976	0.0904851	0.0582075	77.2852	67.597	158.464	246.381	296.667	0.505146	31.1107	15.7154	0.712394	415.518	389.299	78.1955	0.654023	16.991	11.1125	0.927921	176.47
1	Capan1	Control	0	13.4038	0.677478	1.25608	95.0219	233.31	28.0211	117.711	0.29661	0.005298	0.00443018	0.102956	0.0743712	0.00493055	0.00449157	0.0889351	0.0525065	51.7538	45.9612	105.049	76.1841	185.744	0.397103	52.9559	21.029	0.628676	836.877	221.415	58.9623	0.683017	19.0075	12.9824	0.97191	218.606
1	Capan1	Control	0	17.6288	0.826578	0.686808	142.029	245.203	41.8286	124.832	0.333924	0.0136309	0.0124978	0.139639	0.0921861	0.0107135	0.00977712	0.0928292	0.078735	32.9245	45.9574	95.4912	181.082	357.018	0.28176	55.776	15.7154	0.679144	705.88	296.382	21.978	0.686406	18.6306	12.7882	0.969986	206.507
1	Capan1	Control	0.075	11.9511	0.801621	1.22941	64.1409	276.4	75.3725	176.56	0.241111	0.0067463	0.00577487	0.116584	0.0776754	0.00568279	0.00515443	0.0829684	0.0587439	78.5418	74.2304	150.047	85.5257	224.824	0.329531	47.367	15.6089	0.645963	750.936	289.157	58.1633	0.849643	16.7934	14.2684	0.98113	204.839
1	Capan1	Control	0.0414386	12.9132	0.722552	1.09591	104.648	279.935	77.0434	215.733	0.258796	0.00958725	0.00894414	0.141963	0.0768624	0.00914436	0.00841127	0.089756	0.0680409	76.682	77.1958	182.87	115.598	255.436	0.442368	41.5038	18.3599	0.682123	533.582	297.686	49.6815	0.804888	16.7561	13.4868	0.998776	193.992
1	Capan1	Control	0.0293372	7.37414	0.862667	1.32126	111.5	293.058	59.1064	101.959	0.32778	0.00630248	0.00592457	0.16729	0.0858253	0.00561216	0.00496107	0.0939471	0.0612025	63.4127	49.0935	107.903	107.509	221.802	0.538498	46.0812	24.8147	0.721795	1151.85	274.484	39.6396	0.706656	18.0967	12.7882	0.991986	197.329
1	Capan1	Control	0.0163435	14.8582	0.83514	1.18051	54.9269	252.774	46.2874	72.2289	0.311669	0.00739209	0.00665607	0.112839	0.0729533	0.00804567	0.00761574	0.1273	0.0540979	64.6859	82.685	93.3274	76.6823	214.122	0.409145	63.8527	26.125	0.643126	1097.62	268.043	41.841	0.848528	16.4673	13.973	0.988954	201.918
1	Capan1	Control	0.047744	12.277	0.727898	1.04403	181.985	388.337	27.5276	107.69	0.316369	0.00923655	0.0081551	0.214177	0.0901453	0.00694105	0.00626828	0.0912767	0.0635833	52.3437	55.2162	117.968	202.491	371.959	0.447596	49.4019	22.1121	0.698089	795.158	272.207	33.3333	0.833897	16.4673	13.732	0.98288	199.832
1	Capan1	Control	0	9.50951	1.02106	1.02116	65.6847	236.03	32.321	114.624	0.128964	0.00389767	0.00309597	0.0757003	0.0493798	0.00388607	0.00314097	0.0740923	0.0575246	31.384	31.6839	114.932	67.2795	231.138	0.513058	30.6309	15.7154	0.810421	394.659	289.888	83.6207	0.722938	17.9579	12.9824	0.996198	204.422
1	Capan1	Control	0.00714286	9.15873	0.794562	1.32461	91.7383	253.363	29.92	73.3253	0.273016	0.00434734	0.00352968	0.176089	0.0766113	0.00573446	0.00515069	0.0902258	0.0558341	47.4318	36.5422	73.2779	105.073	191.274	0.542157	49.0629	26.5998	0.823491	1051.31	195.051	42.328	0.813306	16.3529	13.2999	0.978218	192.74
1	Capan1	Control	0	17.2497	1.06382	1.22209	70.0554	254.401	55.2139	104.948	0.326087	0.00783173	0.00747361	0.12809	0.0791621	0.0058183	0.00507986	0.0818997	0.0557437	61.4066	42.304	90.2599	77.642	208.168	0.31005	59.654	18.4958	0.626812	825.196	291.644	50.7109	0.787839	17.7358	13.973	0.989599	213.6
1	Capan1	Control	0.0193309	15.0677	0.675964	1.3564	121.005	280.834	27.8283	67.8571	0.479554	0.0139215	0.0134226	0.242868	0.0865357	0.0085301	0.00768072	0.106028	0.0734588	26.6673	35.1758	64.6083	131.912	207.043	0.284471	65.0181	18.4958	0.415418	1122.23	119.077	12.1739	0.647657	19.6443	12.7228	0.932569	214.851
1	Capan1	Control	0.0169122	26.0055	0.923904	1.3809	260.532	415.676	23.1023	49.1379	0.377523	0.0170566	0.0161982	0.237341	0.113112	0.0122859	0.0111752	0.108066	0.081728	30.975	34.413	58.8214	214.09	301.018	0.197322	70.5097	13.9131	0.483446	764.703	226.746	1.59363	0.4159	19.6443	8.17006	0.836286	157.279
1	Capan1	Control	0	8.23766	0.917286	1.23366	43.3521	210.534	25.0764	72.3836	0.24572	0.00417598	0.00335616	0.122094	0.0875755	0.0036403	0.00287122	0.0664034	0.0488729	35.1742	27.2657	83.7065	62.627	170.658	0.600733	41.3073	24.8147	0.777262	828.533	276.255	63.6364	0.728811	17.5466	12.7882	0.927167	207.342
1	Capan1	Control	0	13.6847	0.867231	0.974282	193.217	497.779	66.7927	104.883	0.382011	0.0176107	0.0153822	0.27329	0.102824	0.011941	0.0102754	0.231696	0.0817303	96.6558	70.9768	104.462	225.33	510.919	0.444925	51.9378	23.1084	0.645871	788.483	328.434	0	0.679232	18.7311	12.7228	0.964149	204.422
1	Capan1	Control	0.035461	16.6028	0.945699	0.992061	129.036	224.903	33.865	76.9416	0.236702	0.00950751	0.00867927	0.155072	0.0811765	0.0073013	0.006105	0.101169	0.0670146	33.3943	32.4759	73.8926	108.97	226.702	0.310709	44.1958	13.732	0.7549	470.587	207.806	53.3333	0.600788	16.7934	10.0893	0.946577	148.101
1	Capan1	Control	0	10.7142	0.936126	1.07556	395.151	328.118	53.2887	113.466	0.226687	0.00366701	0.00267306	0.119079	0.0709834	0.00640296	0.00525243	0.0622085	0.0451608	52.847	55.8763	125.837	414.972	305.067	0.468661	38.3917	17.9927	0.775342	550.269	358.864	78.3217	0.772432	16.5557	12.7882	0.966928	194.409
1	Capan1	Control	0	7.66757	0.901794	0.866939	381.725	322.763	55.4142	109.456	0.207769	0.00618911	0.00462846	0.193208	0.0639948	0.00520123	0.0043969	0.072806	0.0478256	50.3713	53.6806	109.743	463.295	372.302	0.552605	29.7535	16.4419	0.787038	461.826	417.775	58.1395	0.725155	16.8058	12.1868	0.971251	179.808
1	Capan1	Control	0	10.1391	0.769673	0.953862	55.9412	169.122	21.3572	59.4675	0.265141	0.00792535	0.00614115	0.118338	0.0779941	0.00859836	0.00739174	0.0967466	0.0589296	34.8312	35.7391	74.1938	68.8489	177.303	0.54853	48.55	26.6311	0.871114	929.909	162.411	23.6686	0.75271	17.162	12.918	0.997502	193.575
1	Capan1	Control	0	12.4986	0.880487	1.33066	69.7314	281.687	27.6735	70.8161	0.264903	0.00608179	0.00498631	0.10731	0.076456	0.00423663	0.00343457	0.086282	0.0597632	32.0538	26.966	71.4378	82.8922	211.69	0.37576	63.9474	24.0289	0.747058	1308.72	277.255	54.7826	0.831292	18.1887	15.1201	0.995125	221.526
1	Capan1	Control	0	10.0668	0.993723	1.01226	34.3758	151.154	26.727	121.559	0.136182	0.0011985	0.00132247	0.0666107	0.056646	0.00370574	0.00298563	0.0669557	0.0479931	28.0211	26.4048	121.458	33.9204	149.323	0.52117	28.0428	14.615	0.836984	312.473	219.63	95	0.879615	15.1201	13.2999	0.978813	176.887
1	Capan1	Control	0	10.087	1.07645	1.02917	19.6772	101.644	36.941	128.638	0.15942	0.00164936	0.00153369	0.0700263	0.054727	0.00284194	0.00216565	0.0654605	0.0485769	34.1954	38.7092	134.977	20.1575	98.7622	0.528861	29.5142	15.6089	0.779193	345.431	75.8679	85.7143	0.7358	16.1862	11.9098	0.927284	166.458
1	Capan1	Control	0	11.2515	1.17807	1.05473	23.4284	112.382	33.953	143.514	0.214099	0.00295451	0.00216704	0.0821296	0.0599402	0.00255359	0.00209959	0.0772198	0.0554677	49.3022	46.8768	161.985	27.882	106.55	0.42508	36.7199	15.6089	0.701923	479.348	79.0282	84.1379	0.789437	16.1991	12.7882	0.913674	176.887
1	Capan1	Control	0	8.41905	1.01306	1.02363	37.3753	134.293	36.7223	163.714	0.245503	0.00348356	0.00265966	0.0723748	0.0563097	0.00325965	0.00306214	0.0629707	0.0478578	37.3224	36.2886	160.563	38.237	131.193	0.567248	28.806	16.3401	0.778586	394.242	67.7078	90	0.773952	15.8344	12.2551	0.812936	158.531
1	Capan1	Control	0	7.23994	1.20513	1.00235	116.441	123.519	42.5307	115.566	0.132045	0.0100077	0.0064618	0.19019	0.0610492	0.00427775	0.00349419	0.0669081	0.0504488	62.4119	61.8833	130.357	137.193	123.23	0.658911	21.6545	14.2684	0.890739	259.073	171.023	20.9302	0.525226	15.5553	8.17006	0.840424	137.672
1	Capan1	Control	0	10.2533	0.971432	0.994125	14.5525	93.8667	41.8889	171.2	0.158022	0.000690934	0.00065939	0.0795954	0.0594348	0.00302053	0.00298426	0.0796855	0.0510192	39.2205	41.4416	166.662	19.2481	94.4214	0.505964	29.7745	15.0648	0.779762	345.848	66.8083	83.9286	0.7283	16.3529	11.9098	0.87911	170.629
1	Capan1	Control	0	14.6504	0.951472	0.994358	31.8439	89.1238	25.793	91.9714	0.137391	0.00173624	0.00152604	0.105169	0.064768	0.00223133	0.002246	0.107473	0.0701934	22.287	27.6665	94.7366	30.369	89.6295	0.317277	29.6411	9.40445	0.679312	239.882	94.0799	88.4615	0.551112	17.0645	9.40445	0.905515	146.433
1	Capan1	Control	0	11.1949	0.775937	1.13148	52.3666	158.976	87.7976	168.932	0.219108	0.00820282	0.00649012	0.10462	0.0672852	0.00849206	0.00783394	0.105936	0.0661786	57.8521	83.9268	164.205	59.5527	140.502	0.428821	30.2747	12.9824	0.631504	327.492	117.486	62.3077	0.769309	12.7882	9.83806	0.909617	113.892
1	Capan1	Control	0.042786	10.993	1.04136	1.05937	27.4241	106.102	48.7468	156.301	0.149254	0.00293119	0.00218538	0.0813306	0.0574536	0.00286139	0.00234852	0.0713039	0.0513813	60.6189	59.3056	169.182	29.3122	100.156	0.445429	33.9451	15.1201	0.800138	419.273	68.2846	84.2975	0.64153	18.9965	12.1868	0.829109	186.065
1	Capan1	Control	0	9.71313	0.823585	1.12925	29.9682	118.53	39.1667	110.307	0.252368	0.00363071	0.00351707	0.0996832	0.0691329	0.00431353	0.0035579	0.0796183	0.0538993	53.8838	52.071	120.636	35.4408	104.963	0.50959	38.6947	19.7185	0.65964	616.602	85.8794	70.1149	0.766152	16.606	12.7228	0.966471	183.562
1	Capan1	Control	0.0222024	6.76495	1.0261	1.1421	27.1957	122.966	56.3201	129.53	0.191533	0.00153498	0.00135416	0.0859758	0.0608776	0.00285573	0.00230118	0.0763297	0.0537636	40.9979	48.8025	134.154	41.2133	107.666	0.682865	48.82	33.3375	0.764875	1409.26	132.19	87.6068	0.72745	23.1535	16.843	0.869247	359.198
1	Capan1	Control	0.00295483	15.1034	0.956399	1.02808	56.4058	124.777	31.5314	81.5871	0.361334	0.00676068	0.00559803	0.104416	0.0762764	0.00542007	0.00456149	0.0810085	0.0609517	46.2365	43.1004	79.3059	47.9541	121.368	0.255515	61.0879	15.6089	0.476319	988.316	91.4575	57.2414	0.654774	19.4308	12.7228	0.955699	206.925
1	Capan1	Control	0.0608695	25.0457	0.918785	1.33886	94.824	210.046	77.5082	174.85	0.550543	0.0087964	0.00842963	0.132778	0.0805188	0.00742725	0.00664808	0.0846421	0.0583324	72.3473	73.4702	170.075	81.7277	156.884	0.266785	69.3283	18.4958	0.465921	767.624	122.7	62.9344	0.624695	18.4958	11.5542	0.895458	185.648
1	Capan1	Control	0	10.606	0.800319	1.06156	38.0182	190.807	35.6664	99.2798	0.277469	0.00605458	0.00533075	0.134973	0.0846958	0.00548197	0.00445265	0.0972631	0.0576276	45.2703	38.01	101.312	59.6471	179.742	0.492727	44.6466	21.9986	0.683357	751.771	203.864	59.3583	0.670512	15.887	10.6525	0.952451	154.359
1	Capan1	Control	0	8.6759	0.881693	1.11646	54.9786	183.375	47.5153	195.651	0.252078	0.00504324	0.00428231	0.10091	0.0698335	0.00644938	0.00591592	0.0744409	0.0525815	61.3803	51.6135	193.8	56.153	164.246	0.528458	31.3045	16.5431	0.68254	451.813	188.04	72.2222	0.696897	15.7287	10.9613	0.913152	162.286
1	Capan1	Control	0.0778967	12.2298	0.939475	1.36432	169.989	278.957	98.6992	237.745	0.24148	0.00931218	0.00787707	0.175477	0.0812262	0.009813	0.00904722	0.10068	0.0697504	98.6339	98.451	202.095	144.056	204.466	0.394226	36.1935	14.2684	0.738875	428.451	295.739	45.8015	0.728431	14.2976	10.4148	0.940554	133.083
1	Capan1	Control	0	8.67412	0.98888	1.03658	160.071	288.498	75.8972	189.571	0.106145	0.00718296	0.00429921	0.107993	0.0545891	0.00286551	0.00259251	0.0603505	0.0426747	96.7455	77.4074	184.694	152.715	278.317	0.552911	31.1709	17.2348	0.772885	448.059	349.737	92.2481	0.470277	24.722	11.6262	0.731857	265.331
1	Capan1	Control	0	6.79114	1.02409	1.00319	149.045	359.028	101.004	287.81	0.113924	0.00370583	0.00374846	0.095282	0.0574867	0.00238383	0.00274303	0.0642995	0.0516316	125.772	96.2468	285.837	151.923	357.887	0.735215	21.1575	15.5553	0.912317	263.662	521.3	90.5882	0.753749	14.7429	11.1125	0.973686	145.598
1	Capan1	Control	0	8.88211	0.906888	1.01689	145.088	378.283	101.961	308.566	0.119279	0.00838281	0.00792025	0.0818445	0.054891	0.00807507	0.00721874	0.109171	0.0676633	153.242	149.173	321.506	158.328	372	0.449859	25.8441	11.6262	0.764124	300.792	301.715	73.5849	0.460024	21.9321	10.0893	0.739497	191.072
1	Capan1	Control	0.0386741	9.28729	0.83242	1.10017	221.194	318.713	130.49	219.897	0.195442	0.00367378	0.002969	0.120089	0.0729569	0.00779037	0.00655461	0.128935	0.0651716	132.212	145.942	208.486	215.65	289.695	0.525382	37.4511	19.6761	0.719251	604.087	307.022	67.5	0.608328	20.0333	12.1868	0.88624	239.882
1	Capan1	Control	0	8.1374	0.999242	0.842926	216.009	347.308	160.637	229.446	0.0839695	0.0124274	0.00916591	0.164957	0.0544453	0.0057684	0.00511294	0.140223	0.0625099	168.301	173.187	240.523	250.397	412.026	0.5547	21.0884	11.6977	0.8746	218.606	326.412	57.5	0.546821	17.1984	9.40445	0.741785	155.611
1	Capan1	Control	0	7.62005	0.727831	1.05126	171.46	478.444	208.747	347	0.137203	0.00319081	0.00285632	0.0970056	0.0633965	0.00898042	0.00692756	0.107164	0.0510838	167.169	251.358	375.43	218.027	455.115	0.566859	17.3554	9.83806	0.825121	158.114	316.976	90.1408	0.662085	12.3399	8.17006	0.940743	89.278
1	Capan1	Control	0.125427	7.48005	1.02232	0.893674	343.276	322.633	61.9794	129.289	0.0912201	0.00827348	0.00602898	0.268054	0.0551194	0.00410858	0.00388067	0.080264	0.0412518	122.747	102.553	174.113	362.907	361.019	0.600812	26.157	15.7154	0.823713	365.873	464.72	68.1818	0.536049	25.6171	13.732	0.83726	277.429
[truncated: 130,001 more rows]

## Sheet: Fig2Supp2
Rep	Cell_line	Treatment	Cytoplasm_Tubulin_Mean	Actin_Filament_Cell_Area	Cytoplasm_Actin_Mean	Cell_Roundness	Tubulin_Cytoplasm_SER_Ridge_0_px	Actin_Cell_SER_Bright_4_px	Elongatedness	Cell_Area	Nucleus_Roundness	Membrane_Cytoplasm_Actin
[truncated: 240 more rows]

[truncated: 5 more sheets: Fig2Supp3 A, Fig2Supp3 C, Fig2Supp3 D, Fig2Supp3 F, Fig2Supp3 G]
