# Supplementary material for: Actin networks modulate heterogeneous NF-κB dynamics in response to TNFα
Source: eLife. 2024 Aug 7;13:e86042. doi: 10.7554/eLife.86042 (PMC11524587; doi:10.7554/eLife.86042)
Supplement: Figure 3—source data 1. — Bulk RNA-seq expression data, results from DESeq2 analysis (R), and fold-changes calculated in R for Figure 3 and Figure 3—figure supplement 1. FASTQ files and processed counts are available from GEO under accession GSE268743. Protein abundance of RELA interactors from mass spectrometry analysis of MIA PaCa2 cells expressing RELA-GFP with GFP-Trap co-immunoprecipitation, shown in Figure 3—figure supplement 1B. [file elife-86042-fig3-data1.xlsx]

## Sheet: Fig3 A,B,C,D & Fig3Supp1 A raw
Sample_ID	Cell_line	Time	TNF	TNF_dose	SR	Sample_name	A4GALT	AAAS	AACS	AADAT	AAED1	AAGAB	AAK1	AAMDC	AAMP	AAR2	AARS	AARS2	AARSD1	AASDH	AASDHPPT	AATF	AATK	ABALON	ABAT	ABBA01000935.2	ABCA1	ABCA10	ABCA11P	ABCA17P	ABCA2	ABCA3	ABCA4	ABCA5	ABCA7	ABCB10	ABCB6	ABCB7	ABCB8	ABCB9	ABCC1	ABCC10	ABCC2	ABCC3	ABCC4	ABCC5	ABCC6P1	ABCD1	ABCD3
Sample_H970001	MIA PaCa2	1	No	0	No	MIA_1hr_0TNF	67.97	1442.99	1313.48	93.6884	666.841	2483.66	1145.39	379.346	5163.89	1605.56	19107.8	784.411	2.75554	336.176	1477.89	5618.55	194.725	23.8814	10.1037	110.222	87.2588	972.706	9.18514	6.4296	2469.88	1360.32	2.75554	67.97	360.976	1874.69	12.8592	1075.58	984.647	398.635	1738.75	659.493	1445.74	39.4961	910.247	1491.67	4.59257	773.389	4033.19
Sample_H970002	MIA PaCa2	5	No	0	No	MIA_5hr_0TNF	40.5181	1445.86	1244.33	111.958	672.814	2405.5	1318.97	317.748	4897.36	1492.77	19280.2	658.953	4.26507	313.482	1523.7	5125.54	188.729	27.7229	3.1988	99.1628	105.56	1059.87	6.3976	1.06627	2773.36	1278.45	4.26507	57.5784	324.145	1934.21	10.6627	1036.41	987.363	398.784	1886.23	623.766	1701.76	25.5904	958.574	1471.45	3.1988	789.037	4236.28
Sample_H970003	MIA PaCa2	1	Yes	0.01	No	MIA_1hr_0.01TNF	51.5772	1444.16	1266.27	105.26	735.765	2446.24	1185.22	328.41	4938.78	1666.26	19555.1	809.447	9.47337	348.41	1518.9	5316.67	185.257	39.9987	8.42077	107.365	95.7863	856.814	15.789	7.36818	2312.56	1316.8	5.26298	79.9974	338.936	1736.78	6.31558	1150.49	954.705	322.095	1722.05	655.768	1538.9	24.2097	968.389	1529.42	6.31558	758.922	4345.12
Sample_H970004	MIA PaCa2	5	Yes	0.01	No	MIA_5hr_0.01TNF	36.3045	1401.76	1350.32	105.888	722.056	2438.45	1264.61	332.791	5143.13	1675.05	19039.7	720.039	4.03383	314.639	1496.55	5367.01	164.379	24.203	13.1099	103.871	70.592	1005.43	7.0592	4.03383	2765.19	1257.55	8.06766	51.4313	303.546	2016.92	6.05075	1061.91	926.773	365.062	1933.21	701.886	1708.33	34.2876	905.595	1575.21	4.03383	734.157	4208.29
Sample_H970005	MIA PaCa2	1	Yes	0.1	No	MIA_1hr_0.1TNF	49.8492	1353.86	1260.96	115.559	771.53	2400.69	1417.3	330.817	5148.06	1608.77	18664	790.789	6.79762	285.5	1432.03	5405.24	171.073	28.3234	10.1964	92.9008	108.762	868.962	13.5952	3.39881	2669.2	1292.68	11.3294	72.5079	372.736	1790.04	2.26587	1060.43	998.117	423.718	1829.69	635.577	1407.11	23.7917	879.158	1621.23	1.13294	842.904	4189.6
Sample_H970006	MIA PaCa2	5	Yes	0.1	No	MIA_5hr_0.1TNF	32.2054	1391.99	1222.02	95.7218	736.252	2359.05	1351.73	304.163	5065.2	1522.6	18010.9	647.687	4.47298	261.222	1442.98	5507.13	127.927	50.0974	10.7351	95.7218	93.038	968.847	17.8919	3.57838	2767.88	1352.63	2.68379	71.5677	334.579	1778.46	7.15677	1001.05	971.531	353.365	2149.71	650.371	1746.25	33.1	863.285	1510.97	8.05136	765.774	3893.28
Sample_H970007	MIA PaCa2	1	Yes	10	No	MIA_1hr_10TNF	59.9508	1435.19	1248.07	102.643	679.443	2452.53	1255.33	317.013	5030.42	1522.39	18720.1	812.061	7.26677	327.004	1375.24	5460.07	193.478	38.1505	5.45007	100.826	105.368	957.396	10.9001	3.63338	2689.61	1288.94	5.45007	54.5007	355.163	1842.13	8.17511	1058.22	1020.07	370.605	1707.69	716.685	1551.45	38.1505	875.645	1626.85	2.72504	782.086	3976.74
Sample_H970008	MIA PaCa2	5	Yes	10	No	MIA_5hr_10TNF	56.8403	1387.42	1184.6	127.891	776.387	2282.66	1290.53	348.793	5314.57	1464.93	19385.1	709.212	9.04278	189.898	1486.89	5738.29	105.93	33.5875	9.04278	80.0932	60.7158	1010.21	20.6692	2.58365	2928.57	1351.25	9.04278	56.8403	370.754	1698.75	14.2101	873.274	971.453	347.501	2100.51	612.325	1514.02	15.5019	861.647	1362.88	3.87548	654.955	3589.98
Sample_H970009	MIA PaCa2	1	No	0	Yes	MIA_1hr_0TNF_SR	50.9531	1323.62	1246.04	106.538	766.613	2383.22	1320.15	323.089	4805.8	1503.12	20076.7	775.877	12.7383	341.617	1298.15	5167.11	172.546	10.4222	9.2642	94.9581	113.486	1149.92	8.10618	2.31605	2779.26	1273.83	8.10618	53.2692	358.988	1842.42	9.2642	1147.6	946.107	397.203	1840.1	617.227	1680.29	22.0025	887.047	1503.12	3.47408	785.141	3623.46
Sample_H970010	MIA PaCa2	5	No	0	Yes	MIA_5hr_0TNF_SR	37.9735	1332.87	1184.77	115.819	741.433	2136.01	1422.11	305.687	4890.99	1416.41	20126	701.561	8.54405	277.207	1414.51	5019.15	166.134	5.69603	12.3414	82.5925	93.9845	1238.89	8.54405	5.69603	2949.6	1292.05	7.59471	44.6189	338.914	1718.3	6.64537	1026.24	946.491	398.722	1799.95	706.308	1766.72	17.0881	855.354	1565.46	2.84802	785.103	3750.84
Sample_H970011	MIA PaCa2	1	Yes	0.1	Yes	MIA_1hr_0.1TNF_SR	48.9406	1317.1	1147.1	109.043	698.047	2209.2	1345.44	307.381	4460.46	1488.82	19824.4	776.181	18.0307	367.484	1227.81	4892.34	216.369	12.8791	8.58607	79.8504	116.771	1224.37	17.1721	2.57582	3007.7	1222.66	9.44468	53.2336	473.092	1580.7	14.5963	986.539	980.529	351.17	1724.08	633.652	1879.49	19.748	880.072	1706.05	2.57582	768.453	3563.22
Sample_H970012	MIA PaCa2	5	Yes	0.1	Yes	MIA_5hr_0.1TNF_SR	39.9371	1321.64	1207.4	85.4468	730.941	2199.33	1382.94	299.992	4746.01	1459.1	20181.2	756.018	15.7891	284.203	1500.89	5204.82	135.6	10.2165	7.43015	67.8002	53.8686	1301.21	8.35892	1.85754	3057.51	1324.42	2.78631	52.0111	335.286	1648.57	6.50138	1021.65	943.63	355.719	1756.3	702.15	1802.74	23.2192	860.04	1611.41	3.71508	692.862	3752.23
Sample_H970013	MIA PaCa2	1	Yes	10	Yes	MIA_1hr_10TNF_SR	44.3634	1243.18	1189.74	82.6772	711.83	2227.24	1499.28	352.89	4722.68	1494.24	19526.9	768.293	8.06606	300.461	1210.92	5029.19	172.412	13.1074	9.07432	104.859	102.842	1104.04	8.06606	6.04955	2802.96	1185.71	2.01652	67.5533	403.303	1527.51	12.0991	1031.45	908.441	334.742	1866.29	681.582	1872.34	20.1652	895.333	1659.59	5.04129	714.855	3443.2
Sample_H970014	MIA PaCa2	5	Yes	10	Yes	MIA_5hr_10TNF_SR	61.61	1147.89	1031.97	89.9831	631.503	2052.59	1502.96	374.524	5009.87	1438.92	21815.6	690.681	5.67461	222.931	1411.36	5632.45	140.244	15.4025	9.7279	87.5511	41.3436	1344.07	16.2132	7.29593	2705.17	1298.67	10.5386	44.5862	374.524	1431.62	8.10658	890.914	883.618	274.813	1558.09	637.177	1318.13	12.9705	776.611	1575.92	4.05329	687.438	3125.09
Sample_H970015	PANC1	1	No	0	No	PANC1_1hr_0TNF	189.919	2284.24	1152.03	184.701	279.661	3419.58	3247.4	484.188	4931.63	1515.18	10512.3	779.502	2.08702	258.79	1585.09	1326.3	163.831	13.5656	32.3488	113.743	372.533	20.8702	16.6962	27.1312	1740.57	4355.61	170.092	118.96	1032.03	1131.16	5.21755	1527.7	1952.41	1184.38	14500.6	1207.34	17.7397	2764.26	2615.03	830.634	8.34808	3109.66	1912.75
Sample_H970016	PANC1	5	No	0	No	PANC1_5hr_0TNF	185.316	2153.99	1055.39	200.274	294.179	3661.45	3408.82	447.916	4655.34	1581.42	9387.13	608.302	4.15507	182.823	1546.52	1326.3	138.779	31.5785	24.0994	111.356	355.674	31.5785	26.5924	14.9582	1845.68	4472.52	163.71	125.483	944.863	1319.65	7.47912	1415.22	1839.03	1138.49	14429.7	1116.05	20.7753	2990.82	2841.24	823.535	8.31014	3085.55	1974.49
Sample_H970017	PANC1	1	Yes	0.01	No	PANC1_1hr_0.01TNF	198.385	2284.74	1142.85	168.01	272.423	3484.54	3575.67	495.487	4826.72	1401.03	10505.8	741.332	5.69525	217.369	1576.64	1386.79	168.01	7.59367	25.6286	107.261	376.836	23.7302	18.9842	17.0858	1828.18	4402.43	130.042	130.042	1085.89	1198.85	17.0858	1457.98	1951.57	1141.9	15100	1224.48	15.1873	2853.32	2736.57	780.249	6.64446	3093.47	2022.76
Sample_H970018	PANC1	5	Yes	0.01	No	PANC1_5hr_0.01TNF	170.909	2062	1144.63	199.548	331.656	3482.85	3551.22	379.695	4705.08	1381.13	9061.88	579.243	5.543	197.7	1473.51	1244.4	123.794	12.9337	39.7248	96.0787	373.229	14.7813	24.0197	19.4005	1714.63	4494.45	149.661	119.174	965.406	1225.93	18.4767	1368.2	1734.04	1008.83	14016.4	1152.94	29.5627	3147.5	2799.21	751.076	10.1622	3054.19	1992.71
Sample_H970019	PANC1	1	Yes	0.1	No	PANC1_1hr_0.1TNF	177.892	2130.97	1098.09	176.029	251.47	3320.33	3311.95	470.342	4610.28	1389.6	10147.3	755.341	6.51959	242.156	1597.3	1245.24	183.48	5.58822	37.2548	96.8625	419.116	30.7352	23.2842	18.6274	1815.24	4277.78	155.539	118.284	1129.75	1114.85	22.3529	1352.35	1913.97	1080.39	14480	1209.85	19.5588	3170.38	2738.23	927.644	13.0392	3036.27	1973.57
Sample_H970020	PANC1	5	Yes	0.1	No	PANC1_5hr_0.1TNF	212.32	2033.8	1037.53	203.724	358.451	3476.2	3401.42	383.379	4520.61	1463.03	9038.64	527.791	5.15757	244.125	1555.87	1193.98	113.467	15.4727	38.6818	105.73	410.027	27.507	18.0515	14.6131	1828.36	4580.78	129.799	112.607	973.061	1146.7	25.7878	1336.67	1778.5	1080.51	14563.3	1117.47	17.1919	3355.86	2691.39	902.575	6.87676	3016.32	1948.7
Sample_H970021	PANC1	1	Yes	10	No	PANC1_1hr_10TNF	158.611	2115.1	1112.05	171.902	228.612	3382.21	3341.45	420.894	4613.88	1598.51	10034.1	702.671	4.43046	256.967	1570.16	1299.01	178.991	8.86092	33.6715	105.445	407.602	31.0132	26.5828	29.241	1820.92	4043.24	128.483	121.395	1067.74	1045.59	15.9497	1388.51	1933.45	1080.15	14630.3	1127.11	31.8993	3049.04	2788.53	900.27	6.20265	2984.36	1929.02
Sample_H970022	PANC1	5	Yes	10	No	PANC1_5hr_10TNF	232.364	2070.32	920.345	177.69	388.185	3545.61	2997.04	449.238	4908.81	1587.37	9098.66	533.982	5.4674	172.223	1238.37	1344.07	148.531	20.9584	32.8044	90.212	378.162	16.4022	19.1359	26.4257	1693.98	4352.96	123.928	104.792	940.392	1004.18	6.37863	1320.38	1789.66	1039.72	13027	1197.36	21.8696	2883.14	2215.21	723.519	0.911233	2735.52	1663.91
Sample_H970023	PANC1	1	No	0	Yes	PANC1_1hr_0TNF_SR	178.491	2147.74	1148.49	155.082	283.83	3457.16	3416.2	487.924	4938.49	1482.79	10849.2	771.022	5.85216	264.81	1621.05	1289.67	207.02	10.2413	37.3075	81.9303	387.706	27.7978	27.0662	29.9923	1852.21	4024.09	157.277	131.674	1135.32	1056.32	11.7043	1464.5	1872.69	1171.9	15021.8	1227.49	32.1869	3582.99	2834.64	875.63	7.3152	2754.91	1965.59
Sample_H970024	PANC1	5	No	0	Yes	PANC1_5hr_0TNF_SR	204.126	2041.26	1061.8	185.257	352.504	3558.48	3692.28	403.964	4865.58	1542.95	9458.42	628.674	10.2921	203.268	1459.76	1269.36	144.089	9.4344	32.5916	94.344	437.413	24.8725	20.5841	14.5804	1849.14	4183.73	186.115	117.501	1021.49	1098.68	13.7228	1384.28	1826.84	1313.1	15354.9	1225.61	26.5879	3882.69	3217.13	849.096	4.28836	3013	1890.31
Sample_H970025	PANC1	1	Yes	0.1	Yes	PANC1_1hr_0.1TNF_SR	213.976	2142.22	1121.53	143.88	271.774	3213.32	3578.56	399.667	4906.68	1529.8	11013.6	779.659	2.45949	202.908	1647.86	1305.99	242.26	9.83796	27.0544	102.069	391.059	19.6759	18.4462	11.0677	2003.26	4309.03	215.205	168.475	1180.56	976.418	4.91898	1283.85	2072.12	1189.16	16098.6	1483.07	23.3652	3679.4	2837.02	890.336	8.60822	3000.58	1919.63
Sample_H970026	PANC1	5	Yes	0.1	Yes	PANC1_5hr_0.1TNF_SR	184.698	2279.18	1050.32	136.677	315.218	3520.35	3387.37	513.461	4733.2	1533	9529.2	544.244	6.15661	209.325	1494.82	1327.36	152.684	2.46264	32.0144	116.976	390.329	27.0891	19.7011	9.85057	1789.11	4038.74	194.549	120.67	916.103	1193.15	7.38793	1432.03	1802.66	1167.29	13832.7	1110.65	19.7011	3751.84	2790.18	786.815	11.0819	2836.97	1797.73
Sample_H970027	PANC1	1	Yes	10	Yes	PANC1_1hr_10TNF_SR	220.156	2287.77	1129.96	167.106	245.355	3392.53	3624.62	465.511	4749.27	1501.31	11339.4	745.348	9.28369	234.745	1596.8	1352.77	173.738	6.63121	34.4823	74.2695	377.979	26.5248	23.8724	19.8936	1852.76	3879.26	175.064	139.255	1063.65	1006.62	15.9149	1305.02	1952.23	1167.09	15099.3	1291.76	15.9149	4019.84	2718.8	917.759	7.95745	2826.22	1807.67
Sample_H970028	PANC1	5	Yes	10	Yes	PANC1_5hr_10TNF_SR	306.106	1630.57	848.138	137.374	406.15	2919.21	4239.19	436.014	4369.1	1635.05	7999.07	562.936	4.4796	158.279	1215.46	1215.46	207.555	17.9184	14.932	85.1124	510.674	28.3708	25.3844	10.4524	1548.45	3528.43	171.718	114.976	924.291	866.056	20.9048	1107.95	1585.78	1160.22	11721.6	1191.57	19.4116	3090.92	1997.9	839.178	4.4796	2635.5	1243.84
[truncated: 5,000 more columns]

## Sheet: Fig3 A,B DESeq results
	baseMean	log2FoldChange	lfcSE	stat	pvalue	padj
A1BG	1.40001	-0.949248	0.921918	-1.02964	0.303177	NA
A1BG-AS1	73.2376	0.0674469	0.164316	0.41047	0.681461	0.970436
A4GALT	125.438	-0.029676	0.166658	-0.178065	0.858672	0.988021
AAAS	1737.62	-0.0707495	0.0634243	-1.11549	0.264638	0.946269
AACS	1147.15	-0.0696655	0.0645665	-1.07897	0.2806	0.946269
AACSP1	1.69267	0.947043	0.886575	1.0682	0.285428	NA
AADAT	137.692	-0.00654932	0.106976	-0.0612224	0.951182	0.995045
AAED1	511.462	0.121456	0.111872	1.08567	0.277625	0.946269
AAGAB	2868.22	-0.0440689	0.045968	-0.958686	0.337717	0.951595
AAK1	2409.83	0.0371374	0.0613401	0.605434	0.544891	0.959293
AAMDC	387.869	-0.109719	0.083806	-1.30921	0.190465	0.946269
AAMP	4845.43	-0.004277	0.0401819	-0.106441	0.915233	0.993297
AANAT	2.8115	0.87547	0.700257	1.25021	0.211222	NA
AAR2	1517.9	-0.0279164	0.0527775	-0.528945	0.596843	0.963479
AARS	14688.9	-0.0463414	0.0663869	-0.69805	0.485146	0.955768
AARS2	702.188	-0.0519907	0.108952	-0.47719	0.633227	0.967276
AARSD1	6.94749	0.860422	0.50535	1.70263	0.0886379	NA
AASDH	257.704	-0.11316	0.145655	-0.776907	0.437214	0.952291
AASDHPPT	1464.18	-0.0684172	0.0739513	-0.925167	0.354879	0.952192
AASS	0.434591	-0.829733	2.3864	-0.347693	0.728071	NA
AATF	3307.51	-0.0053907	0.0450287	-0.119717	0.904707	0.993189
AATK	167.18	-0.162326	0.166724	-0.973622	0.330244	0.950511
ABALON	18.0988	-0.106849	0.358496	-0.298048	0.765666	0.979714
ABAT	20.3314	0.350436	0.259065	1.35269	0.176154	0.946269
ABBA01000935.2	96.0415	-0.173949	0.113418	-1.5337	0.125105	0.946269
ABCA1	244.204	0.0530851	0.170734	0.310923	0.755859	0.97951
ABCA10	550.489	-0.0786843	0.117438	-0.67001	0.502851	0.958404
ABCA11P	17.0125	0.364591	0.281913	1.29327	0.195916	0.946269
ABCA13	87.1589	-0.321141	0.260904	-1.23088	0.21837	0.946269
ABCA17P	11.4715	0.0187622	0.395572	0.0474305	0.96217	NA
ABCA2	2280.75	0.0367837	0.0582691	0.631272	0.527862	0.959034
ABCA3	2751.39	-0.0177456	0.047547	-0.373223	0.708982	0.974815
ABCA4	83.5902	-0.156005	0.208693	-0.747532	0.454742	0.952966
ABCA5	91.8198	-0.0480919	0.140743	-0.341701	0.732576	0.976599
ABCA6	1.52402	1.27972	1.08197	1.18277	0.236901	NA
ABCA7	693.767	0.0587968	0.0864529	0.680101	0.49644	0.958404
ABCA8	2.85671	0.391016	0.836402	0.467497	0.640144	NA
ABCA9	0.336557	-0.349165	2.2346	-0.156254	0.875833	NA
ABCB1	0.637849	0.512674	1.25808	0.407505	0.683637	NA
ABCB10	1421.62	-0.141793	0.0694977	-2.04025	0.0413251	0.88411
ABCB10P1	1.61019	0.0713537	0.938323	0.0760439	0.939384	NA
ABCB10P3	0.934951	-2.34063	1.1841	-1.97671	0.0480743	NA
ABCB10P4	3.88545	-0.0169569	0.586402	-0.0289169	0.976931	NA
ABCB4	1.21752	0.131304	1.06239	0.123593	0.901638	NA
ABCB6	11.364	0.381864	0.428144	0.891906	0.372443	NA
ABCB7	1198.8	-0.102518	0.0654936	-1.56531	0.117511	0.946269
ABCB8	1408.16	-0.0138415	0.0531484	-0.26043	0.794532	0.9822
ABCB9	750.545	-0.107746	0.0776839	-1.38699	0.165446	0.946269
ABCC1	8124.6	0.0357857	0.0746536	0.479357	0.631684	0.967276
ABCC10	932.741	0.0146959	0.062949	0.233456	0.815407	0.9822
ABCC11	7.40884	0.617002	0.447675	1.37824	0.168131	NA
ABCC2	830.151	0.0280974	0.128429	0.218777	0.826823	0.983582
ABCC3	1663.26	-0.00922706	0.18391	-0.0501715	0.959986	0.99557
ABCC4	1792.79	-0.0834707	0.0811929	-1.02805	0.303924	0.946269
ABCC5	1200.34	0.0554281	0.0603444	0.918529	0.358342	0.952192
ABCC6	12.771	-0.0674931	0.39821	-0.169491	0.86541	NA
ABCC6P1	5.70923	-0.166654	0.465966	-0.357652	0.720603	NA
ABCC6P2	15.1426	0.238851	0.328567	0.726947	0.467259	0.954767
ABCC8	3.79034	0.725506	0.792709	0.915224	0.360074	NA
ABCD1	1847.06	-0.0564808	0.0518389	-1.08954	0.275914	0.946269
ABCD1P2	0.376851	-0.0110005	2.28414	-0.00481605	0.996157	NA
ABCD1P3	0.430187	0.758757	2.50552	0.302834	0.762017	NA
ABCD1P5	1.03432	-2.87483	1.31511	-2.186	0.0288153	NA
ABCD3	2849.04	-0.0646649	0.0789791	-0.818759	0.412924	0.952192
ABCD4	480.079	0.0375181	0.0732415	0.512252	0.608474	0.963529
ABCE1	4872.37	-0.0473388	0.0620796	-0.76255	0.445732	0.952296
ABCF1	6019.95	0.198229	0.083031	2.38741	0.0169675	0.789942
ABCF2	5123.48	-0.027948	0.0351508	-0.795088	0.426562	0.952192
ABCF2P1	13.8615	-0.425657	0.535269	-0.79522	0.426485	0.952192
ABCF3	2022.88	-0.000607544	0.0467563	-0.0129939	0.989633	0.999851
ABCG1	32.1738	0.604015	0.23329	2.58911	0.00962233	0.708598
ABCG2	31.8941	-0.132023	0.245288	-0.538238	0.590413	0.962976
ABCG4	20.9917	0.390411	0.33706	1.15828	0.246748	0.946269
ABHD1	13.6719	-0.337643	0.332499	-1.01547	0.309882	0.946269
ABHD10	923.453	-0.177112	0.104825	-1.68959	0.0911063	0.946269
ABHD11	702.66	-0.0390596	0.0604767	-0.645861	0.518369	0.958934
ABHD11-AS1	31.3961	-0.0996411	0.239314	-0.416362	0.677145	0.970246
ABHD12	2587.55	-0.0446158	0.0458631	-0.972805	0.33065	0.950511
ABHD13	321.356	-0.0109594	0.0706989	-0.155015	0.87681	0.99054
ABHD14A	52.8267	-0.21456	0.172766	-1.24191	0.214269	0.946269
ABHD14B	2424.26	0.00118228	0.0506424	0.0233456	0.981375	0.998021
ABHD15	711.207	-0.104969	0.0812688	-1.29163	0.196486	0.946269
ABHD16A	28.9758	-0.0311994	0.225641	-0.13827	0.890027	0.991806
ABHD16B	1.30426	0.0735276	0.973562	0.0755243	0.939798	NA
ABHD17A	1223.11	0.055587	0.0637005	0.872631	0.382864	0.952192
ABHD17AP1	205.182	0.0472684	0.0862067	0.548315	0.583475	0.962684
ABHD17AP3	32.6484	-0.133333	0.225739	-0.590651	0.554754	0.959293
ABHD17AP4	3.67886	-0.107455	0.612604	-0.175407	0.86076	NA
ABHD17AP5	14.6652	0.338716	0.299402	1.13131	0.257926	0.946269
ABHD17AP6	5.67945	0.56252	0.565384	0.994933	0.319769	NA
ABHD17B	449.138	-0.0492152	0.0571904	-0.860549	0.389486	0.952192
ABHD17C	232.936	-0.130688	0.103164	-1.2668	0.205228	0.946269
ABHD18	139.762	-0.0525497	0.145033	-0.362328	0.717107	0.975609
ABHD2	2322.8	-0.0698288	0.0942007	-0.741277	0.458526	0.953463
ABHD3	580.386	-0.0323426	0.0735877	-0.439511	0.660291	0.968658
ABHD4	425.773	-0.145766	0.109678	-1.32903	0.183837	0.946269
ABHD5	483.515	-0.0625145	0.061065	-1.02374	0.305959	0.946269
ABHD6	603.24	-0.148798	0.154059	-0.965851	0.334119	0.950511
ABHD8	509.923	0.0106153	0.0828172	0.128178	0.898008	0.992143
ABI1	1441.23	0.0134376	0.0447336	0.300392	0.763878	0.97952
ABI2	2500.12	-0.0170135	0.0498769	-0.341111	0.73302	0.976599
ABI3	0.841652	-0.363579	1.25054	-0.290737	0.771253	NA
ABL1	2858.56	-0.0432942	0.0384533	-1.12589	0.260212	0.946269
ABL2	3607.96	0.342342	0.164891	2.07617	0.0378778	0.87412
ABLIM1	4588.42	-0.0647201	0.0931768	-0.694594	0.48731	0.956878
ABLIM2	48.9599	0.0803659	0.201335	0.399166	0.689771	0.971985
ABLIM3	309.928	0.0184003	0.125323	0.146823	0.883272	0.99054
ABR	5725.58	0.176783	0.0874493	2.02155	0.0432232	0.886912
ABRACL	328.746	-0.0446807	0.0774136	-0.577169	0.563826	0.959432
ABRAXAS1	576.005	-0.121529	0.116552	-1.0427	0.297086	0.946269
ABRAXAS2	1100.89	-0.019513	0.0501615	-0.389003	0.697274	0.973183
ABT1	1506.09	-0.0245051	0.0477458	-0.513241	0.607783	0.963529
ABT1P1	0.463696	0.372176	1.74347	0.213469	0.830961	NA
ABTB1	329	0.0163701	0.0920673	0.177805	0.858876	0.988105
ABTB2	1336.01	0.326377	0.165632	1.9705	0.0487815	0.899755
AC000032.1	0.426519	-0.567967	1.91331	-0.296851	0.766581	NA
AC000068.1	11.3131	-0.0482722	0.363264	-0.132884	0.894285	NA
AC000068.2	3.12117	-0.136868	0.711076	-0.19248	0.847366	NA
AC000068.3	1.62765	-0.241643	0.940303	-0.256985	0.797191	NA
AC000078.1	0.43961	0.611026	1.66706	0.36653	0.713969	NA
AC000089.1	47.7496	-0.0393355	0.308446	-0.127528	0.898523	0.992143
AC000093.1	1.9365	-0.989705	0.774289	-1.27821	0.201175	NA
AC000095.1	0.624709	-1.25853	1.69318	-0.743293	0.457305	NA
AC000123.2	1.85587	-0.767236	0.86623	-0.885719	0.375769	NA
AC000123.3	19.273	0.71202	0.331893	2.14533	0.0319262	0.854226
AC002056.1	25.0509	0.332517	0.276494	1.20262	0.229124	0.946269
AC002059.1	1.26458	0.545656	1.14665	0.47587	0.634167	NA
AC002066.1	21.2437	-0.0873462	0.268206	-0.325668	0.744675	0.977574
AC002070.1	0.374498	-0.627168	2.01752	-0.310861	0.755906	NA
AC002074.1	2.36118	-0.806334	1.00778	-0.800111	0.423647	NA
AC002075.2	44.1075	0.190084	0.257726	0.737541	0.460794	0.953463
AC002094.2	1.18558	-0.271747	1.16366	-0.233528	0.815352	NA
AC002094.4	0.408252	-0.887175	2.12058	-0.418364	0.675681	NA
AC002116.2	28.6905	0.218697	0.234271	0.933521	0.350551	0.952192
AC002310.1	12.0846	-0.220004	0.390603	-0.563241	0.573271	NA
AC002310.2	5.04543	-1.24175	0.568509	-2.18423	0.0289455	NA
AC002310.3	5.44406	-1.33548	0.558751	-2.39011	0.0168432	NA
AC002310.6	6.1517	-0.420753	0.521287	-0.807142	0.419585	NA
AC002347.1	0.739912	1.89772	1.60862	1.17971	0.238114	NA
AC002347.2	1.85979	-1.03964	0.948621	-1.09595	0.273102	NA
AC002350.1	5.18644	-0.0836291	0.50991	-0.164008	0.869725	NA
AC002367.1	2.98073	0.899509	0.797397	1.12806	0.259296	NA
AC002378.1	0.855093	1.77096	1.49069	1.18802	0.234827	NA
AC002398.2	0.54862	1.40477	1.72551	0.814122	0.415575	NA
AC002401.1	3.31077	-1.34612	0.657839	-2.04627	0.0407296	NA
AC002401.4	11.1009	-0.547304	0.367454	-1.48945	0.136369	NA
AC002454.1	3.29207	-0.0340357	0.585813	-0.0580999	0.953669	NA
AC002467.1	55.4299	-0.106224	0.188383	-0.563871	0.572842	0.961064
AC002470.1	10.3251	-0.191697	0.370027	-0.518061	0.604416	NA
AC002472.2	2.72038	-0.947293	0.853578	-1.10979	0.267089	NA
AC002472.3	1.07327	0.9813	1.2808	0.766163	0.443579	NA
AC002480.1	0.573287	-0.421583	1.68973	-0.249498	0.802976	NA
AC002480.2	87.1653	-0.189968	0.202732	-0.937039	0.348738	0.952192
AC002480.3	2.39102	0.721259	0.806653	0.894138	0.371248	NA
AC002486.2	0.944824	-2.2388	1.32443	-1.69039	0.0909541	NA
AC002504.1	1.47087	-0.766578	0.914137	-0.838582	0.401704	NA
AC002519.2	10.0336	0.285676	0.388201	0.735898	0.461793	NA
AC002524.1	60.2982	0.00682781	0.183579	0.0371928	0.970331	0.996353
AC002550.1	1.38517	-1.04743	1.17236	-0.893441	0.371621	NA
AC002550.2	1.96426	0.656326	0.849507	0.772597	0.439761	NA
AC002553.1	0.982666	0.107752	1.05089	0.102534	0.918333	NA
AC002558.1	1.43329	1.22465	1.17376	1.04335	0.296784	NA
AC002558.2	1.18869	0.193083	0.980827	0.196857	0.84394	NA
AC003002.3	1.55224	-0.157971	1.00649	-0.156953	0.875282	NA
AC003005.2	0.575752	0.405499	1.75254	0.231378	0.817022	NA
AC003070.1	0.399379	-0.405965	1.79307	-0.226408	0.820884	NA
AC003071.1	1.19661	-2.06104	1.103	-1.86858	0.0616819	NA
AC003072.1	6.57752	0.86053	0.511037	1.68389	0.0922033	NA
AC003092.1	0.531571	-1.06806	4.78481	-0.223219	0.823365	NA
AC003101.2	5.41939	1.53335	0.814985	1.88145	0.0599112	NA
AC003102.1	6.85072	0.979222	0.5054	1.93752	0.0526818	NA
AC003681.1	3.31679	-0.159573	0.560359	-0.284769	0.775821	NA
AC003965.1	3.17178	0.326175	0.712539	0.457764	0.647122	NA
AC003965.2	55.297	0.0891148	0.265508	0.335639	0.737143	0.976599
AC003984.1	0.593248	0.588447	1.86545	0.315446	0.752423	NA
AC003991.2	1.61183	-0.570326	0.952192	-0.598961	0.549199	NA
AC004024.1	1.55403	0.12202	1.17388	0.103946	0.917212	NA
AC004034.1	0.325751	-0.164674	1.98987	-0.0827564	0.934045	NA
AC004057.1	57.0264	-0.0763772	0.168601	-0.453006	0.650544	0.967896
AC004066.1	1.46757	-0.341627	0.957226	-0.356893	0.721172	NA
AC004067.1	0.751334	-0.387227	1.4037	-0.275863	0.782653	NA
AC004069.1	4.14744	-0.0729029	0.563387	-0.129401	0.89704	NA
AC004076.2	0.978438	-1.20784	1.33487	-0.904832	0.365555	NA
AC004080.2	1.70488	0.309403	0.930842	0.332391	0.739594	NA
AC004129.2	0.506374	-0.229839	2.04223	-0.112543	0.910393	NA
AC004130.1	7.15845	-0.000267692	0.474904	-0.000563675	0.99955	NA
AC004148.2	13.14	-0.136546	0.317299	-0.430339	0.666949	NA
AC004156.1	1.98206	-1.04122	0.807975	-1.28868	0.19751	NA
AC004221.1	1.33611	-2.11165	1.29307	-1.63305	0.102458	NA
AC004223.4	0.581468	0.354145	1.57366	0.225045	0.821944	NA
AC004231.1	0.450738	1.47196	1.55496	0.946622	0.343832	NA
AC004232.3	3.0172	0.871735	0.739943	1.17811	0.238752	NA
AC004233.2	2.76085	0.384283	0.695339	0.552655	0.5805	NA
AC004233.3	44.1785	0.0294513	0.226704	0.129911	0.896637	0.992143
AC004241.1	13.2371	0.154765	0.300048	0.515802	0.605992	NA
AC004241.2	2.25004	-0.0525602	0.730665	-0.0719347	0.942654	NA
AC004264.1	3.66024	0.719724	0.887077	0.811343	0.417169	NA
AC004264.2	1.47839	0.364033	1.03786	0.350753	0.725774	NA
AC004383.1	1.37007	-1.09616	1.03958	-1.05443	0.291687	NA
AC004386.1	3.11203	-0.125858	0.613427	-0.205173	0.837437	NA
AC004408.2	1.04884	-0.318084	1.37939	-0.230597	0.817628	NA
AC004449.1	0.396519	0.741282	2.28053	0.325049	0.745144	NA
AC004453.1	192.358	0.0181495	0.167764	0.108185	0.913849	0.993297
AC004466.1	4.29142	0.130691	0.547452	0.238725	0.811319	NA
AC004466.2	1.05538	2.20086	1.37596	1.59951	0.109708	NA
AC004471.1	1.07965	-0.18944	1.09785	-0.172556	0.863	NA
AC004471.2	0.541608	-1.73572	1.34272	-1.29269	0.196119	NA
AC004477.1	20.558	-0.0839504	0.378157	-0.221999	0.824315	0.983209
AC004477.2	3.191	-0.0986855	0.635804	-0.155214	0.876653	NA
AC004477.3	2.35738	0.711947	0.831673	0.856043	0.391974	NA
AC004490.1	1.33609	-0.0198855	0.938959	-0.0211782	0.983103	NA
AC004492.1	1.56004	1.41726	1.04655	1.35422	0.175665	NA
AC004494.2	2.16699	-0.375901	0.826086	-0.455038	0.649082	NA
AC004520.1	1.83617	0.0885921	0.897344	0.098727	0.921355	NA
AC004528.2	1.75438	-0.473034	0.793961	-0.59579	0.551315	NA
AC004540.1	1.74734	-0.982931	0.856935	-1.14703	0.251369	NA
AC004540.2	0.479645	-0.460196	1.73765	-0.264838	0.791134	NA
AC004542.1	0.638202	0.542038	1.59171	0.340539	0.733451	NA
AC004542.2	0.568804	-0.283282	1.26529	-0.223887	0.822845	NA
AC004552.1	13.1636	0.155369	0.395956	0.392389	0.694771	NA
AC004554.2	0.415176	0.366928	2.01829	0.181802	0.855738	NA
AC004585.1	0.55855	-0.51219	1.71246	-0.299097	0.764866	NA
AC004590.1	3.63655	0.112926	0.701891	0.160889	0.872181	NA
AC004596.1	3.12136	-0.603323	0.759665	-0.794196	0.427081	NA
AC004656.1	113.567	0.249285	0.177637	1.40334	0.160515	0.946269
AC004678.1	2.31939	0.257162	0.915132	0.281011	0.778702	NA
AC004692.1	0.793804	0.176101	1.35703	0.129769	0.896749	NA
AC004706.3	0.734269	1.69542	1.39008	1.21966	0.222595	NA
AC004706.4	74.9742	0.211592	0.251623	0.840908	0.400399	0.952192
AC004707.1	10.1155	-0.253253	0.433093	-0.584754	0.558713	NA
AC004754.1	2.14341	1.3703	0.887784	1.54351	0.122707	NA
AC004771.1	5.23079	-0.287406	0.626105	-0.459038	0.646207	NA
AC004771.2	3.47697	0.872034	0.884017	0.986445	0.323915	NA
AC004771.3	23.4401	-0.0455094	0.307901	-0.147805	0.882497	0.99054
AC004771.4	7.2266	0.297442	0.54755	0.543223	0.586976	NA
AC004801.1	0.525546	-0.0152738	1.6333	-0.0093515	0.992539	NA
AC004801.2	5.71922	-0.521194	0.553958	-0.940854	0.34678	NA
AC004801.6	6.86021	0.17226	0.496127	0.347209	0.728434	NA
AC004803.1	18.8321	0.413967	0.281195	1.47217	0.140975	0.946269
AC004812.2	93.9523	0.0135891	0.12258	0.110859	0.911728	0.993297
AC004816.1	52.1522	-0.254853	0.22657	-1.12483	0.26066	0.946269
AC004816.2	1.61482	-0.203623	0.990901	-0.205492	0.837187	NA
AC004824.1	1.8242	-0.772721	0.78929	-0.979007	0.327577	NA
AC004825.2	10.2518	0.321157	0.444436	0.722616	0.469916	NA
AC004832.5	5.9423	0.48983	0.541643	0.904342	0.365814	NA
AC004834.1	4.39972	-0.273561	0.577407	-0.473774	0.635661	NA
AC004839.1	1.97746	-0.865372	0.914949	-0.945815	0.344243	NA
AC004840.1	1.21816	1.21707	1.0891	1.1175	0.263782	NA
AC004840.2	1.38078	3.4025	1.22356	2.78081	0.00542228	NA
AC004846.1	69.6746	0.334056	0.167606	1.9931	0.0462502	0.895618
AC004846.2	3.08359	-0.0618238	0.674279	-0.0916888	0.926945	NA
AC004854.2	16.1808	-0.302556	0.37699	-0.802556	0.422231	0.952192
AC004865.2	1.95526	-0.530196	1.00997	-0.524959	0.599611	NA
AC004870.1	0.796825	0.0891882	1.4741	0.0605035	0.951755	NA
AC004870.2	0.651321	0.659914	1.57446	0.419136	0.675117	NA
AC004877.1	8.00389	0.395359	0.473169	0.835554	0.403406	NA
AC004877.2	4.43618	-0.413764	0.53494	-0.773478	0.43924	NA
AC004889.1	2.85903	0.130295	0.814043	0.160059	0.872835	NA
AC004890.1	228.092	-0.0326632	0.157794	-0.206999	0.836011	0.984449
AC004890.2	8.64732	0.517481	0.483004	1.07138	0.283999	NA
AC004895.1	1.02911	-0.743304	1.03248	-0.719923	0.471572	NA
AC004898.1	1.0793	1.63646	1.23489	1.32519	0.185109	NA
AC004899.1	0.868698	-0.644339	1.35286	-0.47628	0.633875	NA
AC004908.2	10.1018	0.581704	0.406462	1.43114	0.152391	NA
AC004908.3	0.509041	1.31764	1.54732	0.851558	0.394459	NA
AC004917.1	0.48337	-0.924026	1.8603	-0.496707	0.619396	NA
AC004918.1	6.55461	0.291473	0.485347	0.600547	0.548142	NA
AC004918.3	22.2724	0.24083	0.242622	0.992615	0.320898	0.946916
AC004923.1	3.57563	-0.160645	0.599985	-0.267749	0.788892	NA
AC004923.4	1.39925	-0.275434	1.04815	-0.262781	0.79272	NA
AC004941.2	4.36907	0.0304519	0.655544	0.0464528	0.962949	NA
AC004943.1	6.29748	0.428222	0.47838	0.89515	0.370707	NA
AC004943.2	266.228	-0.0426254	0.127866	-0.333361	0.738862	0.976823
AC004949.1	3.23578	-0.258442	0.748508	-0.345276	0.729887	NA
AC004951.1	3.82025	0.966223	0.628906	1.53636	0.124451	NA
AC004951.2	5.69996	0.455753	0.47245	0.964658	0.334716	NA
AC004951.3	0.634286	0.0439335	1.77237	0.024788	0.980224	NA
AC004951.4	0.395756	0.353475	1.70748	0.207016	0.835998	NA
AC004967.1	26.5762	0.249891	0.222056	1.12535	0.26044	0.946269
AC004975.2	1.24944	-0.480569	1.02504	-0.468828	0.639193	NA
AC004980.1	155.943	0.193077	0.149007	1.29576	0.195058	0.946269
AC004980.2	0.484886	-0.709833	2.24654	-0.315967	0.752028	NA
AC004980.3	1.6717	-0.190301	0.864207	-0.220203	0.825713	NA
AC004982.1	0.329705	-0.761834	1.85142	-0.411486	0.680716	NA
AC004982.2	6.14445	-0.131805	0.534242	-0.246713	0.80513	NA
AC004986.1	28.0788	0.656516	0.26136	2.51192	0.0120076	0.730901
AC004987.2	10.9457	0.772252	0.402241	1.91987	0.0548739	NA
AC005000.1	33.1219	-0.199051	0.266865	-0.745888	0.455735	0.952966
AC005002.1	0.455837	-0.783564	2.07017	-0.378501	0.705058	NA
AC005002.2	4.72666	-0.0824056	0.515668	-0.159804	0.873036	NA
AC005005.3	7.06348	-0.161059	0.422121	-0.381547	0.702797	NA
AC005014.1	9.30374	0.0433227	0.378211	0.114546	0.908805	NA
AC005019.1	15.7548	0.0847594	0.338034	0.250743	0.802013	0.9822
AC005020.1	6.03373	-0.320839	0.492635	-0.651271	0.514872	NA
AC005034.3	27.7105	-0.272918	0.247885	-1.10099	0.270903	0.946269
AC005034.5	11.9329	0.343498	0.339615	1.01144	0.311808	NA
AC005037.1	9.04705	-0.77963	0.380315	-2.04996	0.0403687	NA
AC005041.3	0.905506	1.64434	1.41617	1.16112	0.245592	NA
AC005042.1	1.12055	0.175889	1.16704	0.150713	0.880202	NA
AC005050.1	1.07838	0.745476	1.22598	0.608067	0.543143	NA
AC005052.1	0.818046	-0.577836	1.24646	-0.463582	0.642947	NA
AC005070.3	1.71975	2.18029	1.16616	1.86963	0.0615346	NA
AC005076.1	16.4314	-0.381878	0.28812	-1.32542	0.185033	0.946269
AC005077.2	1.54403	0.566614	0.99926	0.567033	0.570692	NA
AC005077.3	0.4881	0.378764	1.84097	0.205741	0.836993	NA
AC005077.4	315.169	0.0365208	0.24045	0.151885	0.879277	0.99054
AC005082.1	1.02575	-0.772875	1.1055	-0.699117	0.484479	NA
AC005091.1	1.47177	-0.355568	0.911182	-0.390227	0.696369	NA
AC005099.1	9.66253	-0.261554	0.410191	-0.637639	0.523709	NA
AC005104.1	0.967951	-1.07781	0.983668	-1.09571	0.273206	NA
AC005154.1	24.9182	0.478998	0.299635	1.59861	0.109908	0.946269
AC005154.3	1.2845	0.697313	1.01806	0.684945	0.493379	NA
AC005165.1	0.512161	0.84253	1.57186	0.53601	0.591952	NA
AC005165.2	12.3238	0.129602	0.413742	0.313243	0.754096	NA
AC005180.1	12.0885	0.914917	0.396758	2.30598	0.0211117	NA
AC005189.1	0.92227	0.415665	1.16858	0.355701	0.722064	NA
AC005220.1	5.78433	-0.485889	0.499027	-0.973674	0.330218	NA
AC005224.1	6.48633	0.279339	0.456939	0.611328	0.540983	NA
AC005224.4	0.887148	0.920774	1.33048	0.692061	0.488899	NA
AC005229.4	155.266	-0.118779	0.0976059	-1.21693	0.223632	0.946269
AC005244.1	1.35487	0.82422	1.15177	0.715614	0.47423	NA
AC005253.1	1.92288	-1.02886	0.756109	-1.36073	0.173599	NA
AC005253.2	2.22849	-1.38028	0.885563	-1.55865	0.11908	NA
AC005255.1	10.7958	-0.63212	0.389372	-1.62344	0.104496	NA
AC005256.1	63.0885	-0.161506	0.198831	-0.81228	0.416631	0.952192
AC005261.1	42.6207	0.358366	0.203395	1.76192	0.0780828	0.944876
AC005261.2	1.34927	0.43864	1.30974	0.334907	0.737695	NA
AC005261.3	14.747	-0.0502774	0.366274	-0.137267	0.89082	0.991858
AC005261.4	2.27488	0.662039	0.912296	0.725684	0.468032	NA
AC005262.2	1.86562	-0.511006	0.808428	-0.632098	0.527323	NA
AC005288.1	12.3352	-0.077932	0.343264	-0.227032	0.820399	NA
AC005300.1	6.51493	-0.477265	0.44527	-1.07186	0.283785	NA
AC005306.1	10.7031	0.943315	0.423553	2.22714	0.0259376	NA
AC005324.3	0.385128	0.675623	1.73163	0.390165	0.696415	NA
AC005329.1	14.8941	0.162172	0.311522	0.520582	0.602658	0.963529
AC005329.3	2.48428	-0.365699	0.760254	-0.481023	0.6305	NA
AC005332.1	1.19655	-0.725737	1.22343	-0.593197	0.553049	NA
AC005332.4	0.698241	2.4192	1.59919	1.51277	0.130338	NA
AC005332.5	53.3678	0.0748175	0.160863	0.465102	0.641859	0.967692
AC005332.6	27.6557	0.540577	0.294378	1.83634	0.0663076	0.936617
AC005332.7	446.359	-0.105944	0.0620979	-1.70608	0.087993	0.946269
AC005336.1	0.696769	0.235752	1.86262	0.12657	0.899281	NA
AC005336.2	0.369481	1.01932	1.86386	0.546885	0.584458	NA
AC005339.1	1.44139	-1.00412	0.85652	-1.17232	0.241068	NA
AC005351.1	0.53493	0.733666	1.92195	0.38173	0.702661	NA
AC005355.2	0.658875	-1.31281	1.37731	-0.953172	0.340503	NA
AC005357.2	0.882468	1.9028	1.80565	1.0538	0.291974	NA
AC005363.2	1.82072	0.0774446	0.897081	0.0863295	0.931204	NA
AC005383.1	1.14614	-0.980296	1.18192	-0.829408	0.406873	NA
AC005393.1	1.4878	1.06999	0.903158	1.18472	0.23613	NA
AC005476.1	6.06022	1.7112	0.696618	2.45644	0.0140319	NA
AC005476.2	1.05541	-1.01167	1.14879	-0.880643	0.378511	NA
AC005479.1	0.745344	1.29849	1.55229	0.836498	0.402875	NA
AC005479.2	0.492116	2.07224	1.87021	1.10802	0.267851	NA
AC005480.1	0.753155	-1.05677	1.42398	-0.742127	0.458011	NA
AC005480.2	0.92139	0.469079	1.26404	0.371096	0.710566	NA
AC005498.2	0.962614	-0.0914056	1.13555	-0.0804947	0.935844	NA
AC005498.3	1.72435	-1.11628	0.868283	-1.28561	0.198578	NA
AC005519.1	0.376848	0.372178	2.31363	0.160863	0.872201	NA
AC005520.2	4.4922	0.341874	0.602832	0.567114	0.570637	NA
AC005520.4	13.1377	0.351781	0.410461	0.857039	0.391423	NA
AC005520.5	2.01783	-0.616055	0.751422	-0.819853	0.4123	NA
AC005521.1	4.09167	0.302263	0.663912	0.455276	0.648911	NA
AC005523.1	3.10943	-0.727991	0.70073	-1.0389	0.29885	NA
AC005523.2	6.89341	-0.63732	0.494595	-1.28857	0.197548	NA
AC005531.1	1.32914	1.30224	1.45877	0.892694	0.372021	NA
AC005532.1	0.436649	-1.26619	1.59539	-0.793659	0.427394	NA
AC005534.1	1.36147	-0.646237	0.989783	-0.652908	0.513815	NA
AC005534.2	4.5831	-0.342896	0.604279	-0.567447	0.57041	NA
AC005537.1	0.754891	-0.879406	1.39313	-0.631245	0.52788	NA
AC005540.1	11.3319	0.515131	0.425085	1.21183	0.225578	NA
AC005544.2	0.399923	-0.168304	1.69552	-0.0992641	0.920929	NA
AC005546.1	0.674774	-0.749397	1.68843	-0.443844	0.657156	NA
AC005559.1	0.392244	0.55781	2.39326	0.233075	0.815703	NA
AC005562.1	19.3551	-0.296682	0.270782	-1.09565	0.273232	0.946269
AC005578.1	1.6447	0.859901	1.07042	0.803333	0.421782	NA
AC005586.1	2.24827	0.16222	0.725882	0.22348	0.823162	NA
AC005587.1	6.25282	0.675207	0.510479	1.32269	0.185937	NA
AC005593.1	6.92008	3.49285	1.40457	2.48678	NA	NA
AC005606.1	1.82344	-1.1414	0.917449	-1.2441	0.213461	NA
AC005606.2	1.48814	-0.305921	0.898341	-0.34054	0.73345	NA
AC005609.3	17.9857	-0.0241564	0.399331	-0.0604921	0.951764	0.995045
AC005609.4	6.78849	-0.340317	0.528892	-0.643453	0.519931	NA
AC005614.1	1.49159	0.675912	0.984939	0.686248	0.492557	NA
AC005618.1	4.36533	-0.224145	0.557979	-0.40171	0.687898	NA
AC005622.1	3.03499	0.639159	0.67123	0.95222	0.340985	NA
AC005632.2	4.41025	-0.336623	0.548954	-0.613208	0.539739	NA
AC005670.1	0.821447	2.25869	1.50447	1.50132	0.133273	NA
AC005674.2	12.57	0.705415	0.572454	1.23227	0.21785	NA
AC005695.3	0.863745	1.10666	1.3701	0.807718	0.419253	NA
AC005696.1	13.4354	0.0614381	0.447215	0.137379	0.890731	0.991858
AC005696.2	1.39149	1.12269	0.908898	1.23522	0.216748	NA
AC005696.3	1.37223	0.0244576	1.10939	0.022046	0.982411	NA
AC005696.4	34.4298	-0.427541	0.196892	-2.17145	0.0298973	0.854226
AC005697.2	0.456261	-0.616572	1.93591	-0.318492	0.750112	NA
AC005702.3	0.441695	1.41597	1.96463	0.720732	0.471074	NA
AC005703.6	1.02041	-0.634566	0.987792	-0.642409	0.520608	NA
AC005722.3	1.63849	-0.121553	1.14878	-0.105811	0.915733	NA
AC005726.2	4.19845	0.159302	0.63984	0.248971	0.803383	NA
AC005726.3	1.24597	1.16687	1.21264	0.962261	0.335919	NA
AC005730.2	11.1173	0.165287	0.375137	0.440606	0.659499	NA
AC005736.1	0.400867	1.59549	1.95794	0.81488	0.415141	NA
AC005736.2	0.732529	0.311395	1.44636	0.215296	0.829537	NA
AC005740.1	26.1718	-0.0801686	0.234568	-0.341772	0.732523	0.976599
AC005740.2	3.9852	0.461531	0.624505	0.739035	0.459886	NA
AC005740.3	0.600605	-0.269451	1.78387	-0.151049	0.879937	NA
AC005746.1	0.409233	0.37218	2.03385	0.182993	0.854803	NA
AC005746.2	1.10076	0.517317	1.22964	0.420708	0.673969	NA
AC005759.1	2.66763	0.441112	0.702454	0.627958	0.530031	NA
AC005775.1	6.99931	-0.0485822	0.450302	-0.107888	0.914085	NA
AC005776.1	0.668023	-0.0119173	1.33959	-0.00889624	0.992902	NA
AC005785.1	6.75097	-0.217074	0.442096	-0.49101	0.623419	NA
AC005786.1	2.20736	-0.0637672	0.822527	-0.0775259	0.938205	NA
AC005786.3	4.9263	-1.19343	0.498354	-2.39475	0.0166316	NA
AC005790.1	4.31684	0.500993	0.613579	0.816509	0.414209	NA
AC005821.1	16.4045	-0.293263	0.328131	-0.893736	0.371463	0.952192
AC005822.1	22.0324	-0.116679	0.27708	-0.421103	0.67368	0.970246
AC005828.4	0.94093	0.399731	1.16134	0.344197	0.730698	NA
AC005828.7	5.86231	-0.046771	0.516787	-0.0905035	0.927887	NA
AC005829.1	12.4404	-0.138419	0.361797	-0.382588	0.702026	NA
AC005829.2	0.359264	-0.349353	2.32423	-0.150309	0.880521	NA
AC005831.1	24.2207	0.137414	0.281958	0.487357	0.626006	0.965287
AC005832.3	2.74421	1.03349	0.900133	1.14815	0.250905	NA
AC005837.1	6.40675	-0.539154	0.557855	-0.966477	0.333806	NA
AC005838.1	0.360832	0.73285	2.26251	0.32391	0.746006	NA
AC005839.1	19.4829	0.263781	0.284012	0.928768	0.353009	0.952192
AC005840.1	35.2186	-0.0673637	0.255792	-0.263353	0.792278	0.9822
AC005840.2	5.26552	-0.68887	0.509565	-1.35188	0.176414	NA
AC005840.3	0.560417	0.733542	1.7259	0.425019	0.670823	NA
AC005840.4	0.809278	0.921148	1.48069	0.622107	0.533871	NA
AC005841.1	12.6858	-0.833535	0.357559	-2.33118	0.0197439	NA
AC005865.2	1.4977	0.889257	1.1387	0.780944	0.434836	NA
AC005884.2	0.644763	0.625595	1.48528	0.421196	0.673612	NA
AC005899.8	7.17254	0.0221778	0.617409	0.0359208	0.971346	NA
AC005906.1	2.51244	-0.18105	0.622372	-0.290904	0.771125	NA
AC005911.1	3.88692	-0.329394	0.625475	-0.526629	0.598451	NA
AC005912.1	123.921	0.242672	0.154119	1.57458	0.115354	0.946269
AC005912.2	0.336468	1.29472	2.51049	0.515725	0.606047	NA
AC005921.2	4.98263	0.0730448	0.509713	0.143306	0.886049	NA
AC005943.2	0.976609	-0.977923	1.26817	-0.771126	0.440632	NA
AC005944.1	9.8912	-0.524883	0.380573	-1.37919	0.167836	NA
AC005972.1	1.56361	1.25491	1.13747	1.10325	0.269918	NA
AC005972.4	1.0491	-1.13271	1.26314	-0.896739	0.369858	NA
AC006001.1	0.383918	0.0543365	2.22911	0.0243759	0.980553	NA
AC006001.2	46.7414	-0.0395726	0.227047	-0.174293	0.861635	0.988708
AC006001.3	350.175	0.0941865	0.0918078	1.02591	0.304934	0.946269
AC006011.2	0.562426	2.45109	1.81472	1.35067	0.176801	NA
AC006012.1	0.418915	0.316978	1.78324	0.177754	0.858916	NA
AC006015.1	0.48419	-1.11601	1.65951	-0.672498	0.501267	NA
AC006017.1	1.34022	1.05279	1.06575	0.987839	0.323231	NA
AC006026.1	10.5336	-0.106971	0.376312	-0.284262	0.77621	NA
AC006026.3	0.607552	0.513073	1.45902	0.351656	0.725097	NA
AC006027.1	0.999522	0.0668592	1.09357	0.0611387	0.951249	NA
AC006028.1	0.321107	-0.317376	2.05441	-0.154485	0.877228	NA
AC006030.1	9.56171	-0.500354	0.448243	-1.11626	0.264313	NA
AC006033.1	11.4777	-0.223335	0.340579	-0.655752	0.511983	NA
AC006042.3	0.970908	-0.38304	1.34025	-0.285797	0.775034	NA
AC006042.4	1.14266	-0.596294	1.06193	-0.561518	0.574445	NA
AC006059.1	4.68738	-0.276179	0.475303	-0.581057	0.561202	NA
AC006064.2	26.2434	-0.0762908	0.229709	-0.332119	0.739799	0.976823
AC006064.3	2.0954	-0.267549	0.887806	-0.30136	0.76314	NA
AC006064.4	467.247	-1.37815	0.317292	-4.34349	1.40239e-05	0.0175766
AC006077.2	10.1639	-0.5818	0.361787	-1.60813	0.107807	NA
AC006111.2	3.2738	0.496569	0.7935	0.625795	0.531449	NA
AC006116.1	2.9886	-0.31953	0.772583	-0.413587	0.679177	NA
AC006116.2	0.873224	0.352135	1.52351	0.231134	0.817211	NA
AC006116.8	1.50677	1.7258	1.18457	1.4569	0.145144	NA
AC006122.1	59.5555	0.112458	0.266779	0.421539	0.673362	0.970246
AC006128.1	4.159	-0.672495	0.520391	-1.29229	0.196257	NA
AC006160.1	0.381459	0.744985	2.07152	0.359633	0.719122	NA
AC006207.1	2.13399	0.00159108	0.858504	0.00185332	0.998521	NA
AC006210.1	1.98849	-0.576265	0.812296	-0.709427	0.478059	NA
AC006210.2	6.11038	-0.603078	0.479518	-1.25768	0.208509	NA
AC006213.1	3.92499	0.207324	0.585483	0.354107	0.723259	NA
AC006213.2	6.9197	-0.359417	0.467543	-0.768736	0.44205	NA
AC006213.3	1.83622	-0.641951	0.757626	-0.847319	0.396817	NA
AC006213.4	5.5144	-0.68441	0.434399	-1.57553	0.115133	NA
AC006213.5	0.913234	-0.332697	1.00529	-0.330948	0.740684	NA
AC006238.1	0.416243	0.0220334	2.10743	0.0104551	0.991658	NA
AC006252.1	19.7517	-0.0210383	0.234591	-0.0896808	0.928541	0.993749
AC006254.1	1.67887	1.60621	1.17012	1.3727	0.169847	NA
AC006273.1	4.53182	0.248924	0.559631	0.4448	0.656465	NA
AC006330.1	2.73774	1.60092	0.92872	1.72379	0.0847461	NA
AC006333.2	86.9568	-0.0610855	0.159419	-0.383176	0.701589	0.973468
AC006369.1	5.90959	-0.0184146	0.574911	-0.0320303	0.974448	NA
AC006372.2	0.308501	-0.514799	2.58031	-0.199511	0.841863	NA
AC006372.3	3.31326	-0.125459	0.654069	-0.191813	0.847889	NA
AC006380.1	1.98184	0.198877	0.836358	0.237789	0.812045	NA
AC006435.1	0.534049	-0.40027	1.47749	-0.270911	0.786459	NA
AC006435.2	1.18641	0.914778	1.01113	0.904712	0.365618	NA
AC006441.3	5.21407	-0.151921	0.482659	-0.314757	0.752946	NA
AC006449.2	1.60751	0.946118	1.02348	0.924412	0.355272	NA
AC006449.3	2.43165	0.12161	0.959729	0.126713	0.899168	NA
AC006449.5	12.333	-0.175491	0.392918	-0.446635	0.655139	NA
AC006449.6	20.9787	0.530798	0.333676	1.59076	0.111664	0.946269
AC006449.7	0.766735	-1.10569	1.36964	-0.807289	0.4195	NA
AC006453.2	44.9652	-0.134494	0.175199	-0.767662	0.442688	0.952291
AC006460.1	1.29815	-1.38509	0.999251	-1.38613	0.165707	NA
AC006460.2	13.0716	0.561849	0.379117	1.48199	0.138342	NA
AC006480.2	3.09091	0.696423	0.64647	1.07727	0.28136	NA
AC006483.1	28.1157	-0.225846	0.308899	-0.731133	0.464698	0.954025
AC006483.2	1.04704	0.186639	1.55022	0.120395	0.90417	NA
AC006486.2	2.43985	-0.91712	0.794883	-1.15378	0.248591	NA
AC006504.1	0.404571	1.035	1.86168	0.55595	0.578245	NA
AC006504.3	3.02834	1.05589	0.884101	1.19431	0.232356	NA
AC006504.5	170.899	0.0290884	0.131069	0.221931	0.824367	0.983209
AC006504.8	10.6239	0.697842	0.407563	1.71223	0.0868541	NA
AC006511.2	55.4798	0.0679876	0.191131	0.355712	0.722057	0.976599
AC006511.3	52.5101	0.0812989	0.238202	0.341302	0.732877	0.976599
AC006529.1	2.33004	2.82063	1.19133	2.36763	0.0179025	NA
AC006530.1	1.72757	-0.814368	0.87074	-0.93526	0.349654	NA
AC006538.1	22.7849	0.115624	0.263497	0.438807	0.660801	0.968658
AC006539.1	5.03828	-0.589334	0.485737	-1.21328	0.225023	NA
AC006547.2	1.28037	0.466378	1.0737	0.434364	0.664024	NA
AC006547.3	0.529553	-0.657969	1.49146	-0.441157	0.6591	NA
AC006927.1	1.64203	0.899557	1.09379	0.822424	0.410835	NA
AC006942.1	0.896721	-0.944506	0.989633	-0.9544	0.339881	NA
AC006946.2	1.05366	0.118491	1.13301	0.104581	0.916708	NA
AC006960.1	0.480535	-1.75095	1.91119	-0.916158	0.359584	NA
AC006960.3	0.449562	-0.237446	1.77142	-0.134042	0.893369	NA
AC006965.1	0.403625	-1.60227	2.15907	-0.742111	0.45802	NA
AC006970.1	6.71873	0.243075	0.593377	0.409647	0.682065	NA
AC006971.1	88.6085	0.14464	0.125765	1.15009	0.250108	0.946269
AC006978.1	37.3512	0.0571535	0.181891	0.314218	0.753355	0.97951
AC006989.1	0.33844	0.0115063	2.27096	0.00506673	0.995957	NA
AC006994.2	0.892119	-1.43046	1.22435	-1.16834	0.242668	NA
AC007000.1	14.2944	0.15776	0.331196	0.476334	0.633837	0.967276
AC007014.2	2.23694	0.399289	0.872147	0.457823	0.64708	NA
AC007029.1	0.452993	1.42103	2.03888	0.696964	0.485825	NA
AC007032.1	14.4891	0.0262684	0.414253	0.0634113	0.949439	0.994623
AC007038.1	1.04906	0.706295	1.17224	0.602519	0.546829	NA
AC007038.2	3.65432	0.714819	0.691652	1.0335	0.301372	NA
AC007040.1	1.02352	-0.569238	1.18225	-0.481487	0.63017	NA
AC007040.2	13.0314	0.041837	0.369299	0.113288	0.909803	NA
AC007041.1	10.9586	0.369541	0.395382	0.934643	0.349972	NA
AC007066.1	9.89607	0.431219	0.40567	1.06298	0.287791	NA
AC007066.2	11.8259	-0.168688	0.355147	-0.47498	0.634802	NA
AC007091.1	1.10742	-0.86815	1.21024	-0.717335	0.473167	NA
AC007099.1	1.13582	-0.503696	1.03782	-0.485338	0.627437	NA
AC007114.1	15.8441	0.505173	0.316947	1.59387	0.110965	0.946269
AC007128.1	16.6032	-0.128284	0.325689	-0.393886	0.693665	0.972935
AC007161.1	44.371	0.00856796	0.220311	0.0388902	0.968978	0.996353
AC007163.1	3.66489	-0.421575	0.651898	-0.646689	0.517833	NA
AC007182.1	0.551805	-0.943089	1.55968	-0.60467	0.545398	NA
AC007182.2	92.7537	0.0907142	0.176078	0.515195	0.606417	0.963529
AC007191.1	5.73659	0.73329	0.548507	1.33688	0.18126	NA
AC007193.3	2.77179	0.283773	0.66837	0.424574	0.671147	NA
AC007216.3	1.13257	0.451769	1.15856	0.389941	0.69658	NA
AC007216.4	0.878872	1.46778	1.48017	0.991629	0.321378	NA
AC007225.1	2.83448	0.202785	0.693067	0.292591	0.769834	NA
AC007228.2	22.1745	0.458847	0.305707	1.50094	0.133372	0.946269
AC007229.1	4.60046	-0.567291	0.55802	-1.01661	0.309337	NA
AC007238.1	29.7734	-0.16332	0.228729	-0.714035	0.475206	0.954838
AC007240.1	2.13429	0.454354	0.799435	0.568344	0.569801	NA
AC007249.1	1.28601	0.803617	1.34221	0.598727	0.549355	NA
AC007249.2	40.2161	0.206169	0.195765	1.05315	0.292274	0.946269
AC007250.1	2.08914	-0.345859	0.695933	-0.496973	0.619208	NA
AC007255.1	4.08297	0.309493	0.581841	0.53192	0.594782	NA
AC007256.1	7.2631	0.246321	0.457518	0.538385	0.590311	NA
AC007262.2	0.851642	-1.26627	1.44708	-0.875052	0.381545	NA
AC007285.1	3.23929	0.0894909	0.69141	0.129432	0.897016	NA
AC007292.1	4.07477	-0.374123	0.647911	-0.57743	0.563649	NA
AC007292.2	2.35611	-0.167851	0.759808	-0.220912	0.825161	NA
AC007298.1	0.377708	-0.350008	2.21109	-0.158296	0.874223	NA
AC007314.1	5.97319	-0.692189	0.459343	-1.50691	0.131833	NA
AC007318.1	85.1929	-0.145243	0.142533	-1.01902	0.308196	0.946269
AC007318.2	1.86402	0.107629	0.949932	0.113302	0.909791	NA
AC007319.1	6.41292	-0.329083	0.499709	-0.658549	0.510185	NA
AC007326.3	1.44997	-1.53971	1.01199	-1.52146	0.128144	NA
AC007336.1	0.809713	0.37467	1.52869	0.245092	0.806385	NA
AC007342.3	3.4107	0.591687	0.606299	0.975899	0.329114	NA
AC007342.6	3.53066	0.148852	0.643038	0.231482	0.816941	NA
AC007342.7	2.0359	1.15886	1.00291	1.15549	0.24789	NA
AC007363.1	4.25224	0.0679664	0.625509	0.108658	0.913474	NA
AC007364.1	1.44558	1.01583	0.959432	1.05878	0.289698	NA
AC007365.1	3.76758	-0.361266	0.589225	-0.61312	0.539797	NA
AC007365.2	2.51922	-0.25062	0.89169	-0.281062	0.778663	NA
AC007378.1	1.11436	-0.409697	1.28785	-0.318124	0.750391	NA
AC007382.1	29.6057	-0.0168831	0.22037	-0.0766126	0.938932	0.994176
AC007383.2	65.6074	0.130338	0.151534	0.860124	0.38972	0.952192
AC007384.1	0.5701	0.880645	1.53354	0.574257	0.565794	NA
AC007387.1	11.906	-0.501829	0.326705	-1.53603	0.12453	NA
AC007388.1	36.4142	-0.0722837	0.209431	-0.345143	0.729987	0.976599
AC007389.1	9.66535	-0.065838	0.453629	-0.145136	0.884603	NA
AC007390.2	14.2241	-0.17827	0.323871	-0.550437	0.58202	0.962103
AC007391.1	0.36182	-0.567518	2.45566	-0.231106	0.817232	NA
AC007395.1	1.8386	-0.632162	0.883173	-0.715785	0.474124	NA
AC007405.1	4.19877	0.344038	0.639799	0.537729	0.590764	NA
AC007405.2	3.69952	-0.115625	0.668364	-0.172997	0.862653	NA
AC007405.3	160.722	0.000440453	0.105284	0.00418347	0.996662	0.999851
AC007406.3	2.05844	1.13765	1.00884	1.12768	0.259457	NA
AC007406.4	0.549162	0.164527	1.49979	0.1097	0.912647	NA
AC007406.5	13.0249	-0.0917924	0.321741	-0.285299	0.775415	NA
AC007448.3	2.19695	-1.00716	0.785762	-1.28177	0.199925	NA
AC007450.4	1.44382	1.57405	1.08738	1.44756	0.147741	NA
AC007485.1	1.38084	1.60207	1.07819	1.48589	0.137308	NA
AC007485.2	17.9586	0.0558937	0.288394	0.19381	0.846324	0.985046
AC007493.2	0.981899	0.99319	1.38902	0.715028	0.474592	NA
AC007495.1	2.34165	-0.21228	0.791404	-0.268232	0.78852	NA
AC007497.1	3.71301	0.135048	0.610714	0.221131	0.824991	NA
AC007537.1	6.23016	-0.0995043	0.43347	-0.229553	0.818439	NA
AC007537.2	0.328741	0.391915	2.03734	0.192366	0.847455	NA
AC007541.1	30.8804	-0.0743164	0.209717	-0.354366	0.723065	0.976599
AC007547.1	13.2937	0.0768213	0.31158	0.246554	0.805254	0.9822
AC007559.1	0.409709	0.0115052	1.89931	0.00605758	0.995167	NA
AC007560.1	2.51332	-0.79475	0.765939	-1.03762	0.299449	NA
AC007566.1	1.70916	1.00524	1.19035	0.84449	0.398395	NA
AC007570.1	1.01043	0.970782	1.32433	0.733034	0.463538	NA
AC007610.1	2.74533	-0.433836	0.809144	-0.536166	0.591843	NA
AC007610.2	1.04509	-0.617452	1.23487	-0.500013	0.617066	NA
AC007610.4	1.15954	-0.235337	1.07445	-0.21903	0.826627	NA
AC007611.1	4.96528	0.112804	0.488807	0.230775	0.81749	NA
AC007613.1	2.47847	-0.0380356	0.663219	-0.0573499	0.954266	NA
AC007619.1	0.598178	3.11428	1.57697	1.97486	0.0482846	NA
AC007619.2	7.10091	0.0656562	0.503967	0.130279	0.896346	NA
AC007620.2	0.99126	-0.248508	1.31613	-0.188817	0.850236	NA
AC007621.1	0.584696	0.0115058	1.56617	0.00734646	0.994138	NA
AC007622.2	1.18733	0.083154	1.40915	0.0590102	0.952944	NA
AC007637.1	7.08205	-0.334491	0.471643	-0.709204	0.478198	NA
AC007639.1	2.3955	2.05706	1.162	1.77027	0.076682	NA
AC007663.1	0.469198	1.46516	1.98878	0.73671	0.461299	NA
AC007663.3	5.1112	0.161235	0.691859	0.233046	0.815726	NA
AC007663.4	1.78102	-0.552384	0.947493	-0.582995	0.559897	NA
AC007666.1	1.14116	1.45166	1.35418	1.07198	0.283727	NA
AC007673.1	0.328806	0.0115036	2.03472	0.00565367	0.995489	NA
AC007681.1	2.01845	-1.13165	0.862382	-1.31224	0.18944	NA
AC007683.1	61.6366	0.077473	0.207507	0.373352	0.708886	0.974815
AC007685.1	0.358624	1.75948	1.84768	0.952268	0.340961	NA
AC007686.1	2.66836	-0.0261854	0.727227	-0.0360072	0.971277	NA
AC007686.3	19.8992	0.236057	0.256293	0.921044	0.357027	0.952192
AC007688.1	26.552	0.132751	0.246704	0.538098	0.590509	0.962976
AC007690.1	0.496124	1.74177	2.01587	0.864029	0.387572	NA
AC007728.2	1.9225	0.364317	0.91336	0.398875	0.689985	NA
AC007731.2	6.54965	-0.339266	0.47953	-0.707497	0.479257	NA
AC007773.1	27.3157	0.189842	0.215885	0.879365	0.379203	0.952192
AC007780.1	0.676558	1.39253	1.38048	1.00872	0.313108	NA
AC007785.3	0.370559	0.640525	1.88084	0.340553	0.73344	NA
AC007786.1	0.420762	0.876341	2.04957	0.427574	0.668961	NA
AC007787.2	0.603066	-0.836638	1.57868	-0.529961	0.596139	NA
AC007823.1	3.7884	0.60928	0.655131	0.930012	0.352365	NA
AC007842.1	94.353	0.22219	0.182631	1.21661	0.223754	0.946269
AC007849.2	5.74788	-0.255198	0.466645	-0.546879	0.584462	NA
AC007878.1	1.07878	2.79747	1.32752	2.10729	0.0350922	NA
AC007881.3	3.61518	-0.877818	0.743779	-1.18021	0.237916	NA
AC007906.2	8.60004	-0.388068	0.374744	-1.03556	0.30041	NA
AC007919.1	0.497152	0.720521	1.95634	0.368301	0.712649	NA
AC007938.2	2.52049	-0.288113	0.901232	-0.319688	0.749205	NA
AC007938.3	9.75667	-0.859749	0.368578	-2.33261	0.0196687	NA
AC007950.2	1.11381	0.317846	2.01616	0.157649	0.874733	NA
AC007952.2	6.7399	-0.730023	0.531588	-1.37329	0.169663	NA
AC007952.4	0.359655	1.24884	2.45075	0.509576	0.610349	NA
AC007969.1	151.144	0.165421	0.224356	0.737315	0.460931	0.953463
AC007993.1	4.03411	-0.604945	0.524188	-1.15406	0.248476	NA
AC007996.1	97.2848	-0.0428989	0.146907	-0.292014	0.770276	0.979714
AC007998.3	0.974266	1.45004	1.25118	1.15894	0.24648	NA
AC008013.1	1.47189	-0.813314	1.12355	-0.72388	0.46914	NA
AC008014.1	100.089	0.00471627	0.145706	0.0323684	0.974178	0.996353
AC008026.1	20.9417	-0.00667838	0.271692	-0.0245807	0.980389	0.997404
AC008033.1	4.75455	-0.705178	0.535409	-1.31708	0.187811	NA
AC008035.1	10.871	0.118329	0.424885	0.278496	0.780632	NA
AC008038.1	367.202	0.00516428	0.159946	0.0322876	0.974243	0.996353
AC008040.1	22.7199	0.080949	0.230436	0.351287	0.725373	0.976599
AC008040.5	2.46838	-0.248264	0.759291	-0.326968	0.743692	NA
AC008060.3	0.333902	0.299083	2.07556	0.144098	0.885423	NA
AC008065.1	3.16165	-0.234248	0.6069	-0.385974	0.699516	NA
AC008066.1	16.4804	0.296974	0.275048	1.07972	0.280268	0.946269
AC008074.1	0.655866	0.535202	1.65692	0.323011	0.746687	NA
AC008074.3	3.39836	1.43134	0.790137	1.81151	0.0700619	NA
AC008105.1	8.99238	0.42775	0.393228	1.08779	0.276687	NA
AC008105.2	5.12532	-0.0845909	0.532239	-0.158934	0.873721	NA
AC008105.3	8.8529	0.968245	0.532379	1.81871	0.068955	NA
AC008115.1	1.32125	1.39637	1.29991	1.0742	0.282731	NA
AC008115.3	14.3724	0.45262	0.37922	1.19355	0.232652	0.946269
AC008124.1	249.887	0.159888	0.0910337	1.75636	0.0790278	0.944876
AC008126.1	3.44635	0.6684	0.75466	0.885697	0.375781	NA
AC008147.2	2.68564	0.688511	0.922987	0.74596	0.455692	NA
AC008147.3	0.544195	1.43841	1.46222	0.983714	0.325256	NA
AC008149.1	2.0732	-0.354642	0.863835	-0.410543	0.681408	NA
AC008155.1	382.941	-0.0634582	0.0667281	-0.950996	0.341606	0.952091
AC008264.2	3.14404	-0.142915	0.70692	-0.202166	0.839787	NA
AC008267.1	16.1179	-0.0537663	0.281374	-0.191085	0.848459	0.985633
AC008267.5	56.3425	-0.199058	0.191398	-1.04002	0.298329	0.946269
AC008277.1	0.485377	-3.39469	1.64973	-2.05773	0.039616	NA
AC008280.3	0.503367	1.02409	2.39093	0.428322	0.668417	NA
AC008393.1	17.41	0.192717	0.288351	0.668341	0.503916	0.958404
AC008403.2	1.29737	0.499068	1.14748	0.434925	0.663617	NA
AC008403.3	1.71872	-0.437659	0.864917	-0.506013	0.612848	NA
AC008406.3	3.20548	0.906989	0.803881	1.12826	0.259209	NA
AC008427.1	10.9863	-0.0593354	0.320742	-0.184994	0.853234	NA
AC008429.1	13.4876	0.112413	0.398335	0.282206	0.777785	0.979714
AC008429.2	33.865	-0.118336	0.200748	-0.589477	0.555541	0.959293
AC008434.1	0.882358	-0.77678	1.09682	-0.708214	0.478812	NA
AC008438.1	13.3201	-0.265978	0.324636	-0.819313	0.412608	0.952192
AC008440.1	2.84263	1.71914	0.938643	1.83151	0.0670241	NA
AC008440.2	6.50692	-0.338755	0.601236	-0.563431	0.573141	NA
AC008440.3	14.2296	-0.0635761	0.489247	-0.129947	0.896608	0.992143
AC008443.1	181.17	0.024401	0.102837	0.237278	0.812441	0.9822
AC008443.2	2.10617	-0.984974	0.864651	-1.13916	0.254638	NA
AC008443.4	1.67823	-0.0794262	0.902704	-0.087987	0.929887	NA
AC008443.5	9.23772	0.065566	0.37217	0.176172	0.860159	NA
AC008443.6	1.80526	0.200636	0.812561	0.246918	0.804972	NA
AC008443.7	0.507572	1.80711	1.64768	1.09676	0.272748	NA
AC008446.1	2.32633	1.10431	0.77193	1.43058	0.152551	NA
AC008453.1	1.72432	-0.560334	0.886109	-0.632353	0.527156	NA
AC008464.1	1.27498	-0.21901	1.00683	-0.217524	0.8278	NA
AC008467.1	1.38956	1.09596	1.31189	0.835403	0.403491	NA
AC008481.1	11.8365	0.236788	0.44593	0.530998	0.59542	NA
AC008481.2	2.24492	-1.58866	0.784922	-2.02398	0.0429724	NA
AC008494.3	7.8171	0.525235	0.48142	1.09101	0.275267	NA
AC008498.1	1.15767	0.81129	1.06982	0.75834	0.448248	NA
AC008505.1	287.344	0.00610784	0.135765	0.0449884	0.964117	0.996214
AC008507.1	11.0398	-0.676217	0.29168	-2.31835	0.0204301	NA
AC008514.2	0.522652	-1.62606	1.47288	-1.104	0.269594	NA
AC008522.1	5.66382	-0.509354	0.527142	-0.966255	0.333917	NA
AC008543.1	0.751103	2.25193	1.44364	1.5599	0.118784	NA
AC008549.3	2.50561	2.69696	1.1795	2.28652	0.0222237	NA
AC008550.1	1.30696	-1.72922	1.23284	-1.40264	0.160725	NA
AC008555.1	0.434913	0.37218	2.22308	0.167417	0.867042	NA
AC008556.1	24.9629	-0.379891	0.284374	-1.33589	0.181586	0.946269
AC008560.1	99.8377	0.10047	0.146671	0.685008	0.493339	0.958404
AC008562.1	1.15865	-0.508292	1.28236	-0.396371	0.691831	NA
AC008569.1	1.8981	0.179975	0.919433	0.195746	0.844809	NA
AC008592.3	6.83646	0.0202562	0.477472	0.0424239	0.966161	NA
AC008608.2	51.5895	0.11001	0.175398	0.627201	0.530527	0.959159
AC008610.1	3.11477	-0.0726392	0.63994	-0.113509	0.909627	NA
AC008620.2	0.847263	0.352528	1.25736	0.280371	0.779193	NA
AC008622.2	27.9156	-0.0162011	0.243177	-0.0666226	0.946882	0.994575
AC008629.1	0.471407	0.732853	2.32133	0.315704	0.752227	NA
AC008629.2	14.1881	0.304611	0.334106	0.91172	0.361916	0.952192
AC008635.1	2.55796	0.0364584	0.758191	0.048086	0.961648	NA
AC008649.1	1.02504	-0.457804	1.09061	-0.41977	0.674653	NA
AC008649.2	1.14142	-0.425729	1.15888	-0.367364	0.713348	NA
AC008669.1	5.59789	-0.0685375	0.534785	-0.128159	0.898023	NA
AC008677.1	66.8461	-0.0193694	0.181101	-0.106954	0.914826	0.993297
AC008677.2	2.16605	-0.583921	0.712343	-0.819719	0.412376	NA
AC008686.1	0.331894	-0.279833	2.19108	-0.127715	0.898375	NA
AC008687.2	0.655685	-0.548047	1.36989	-0.400068	0.689107	NA
AC008687.4	8.78739	0.0874294	0.402736	0.217088	0.828139	NA
AC008691.1	1.88533	-0.00862258	0.895925	-0.00962422	0.992321	NA
AC008696.1	0.683617	0.561844	1.90295	0.295249	0.767804	NA
AC008703.1	2.13873	-0.0992942	0.747303	-0.13287	0.894296	NA
AC008708.1	13.2661	-0.103172	0.399488	-0.258261	0.796205	NA
AC008708.2	68.5172	-0.223499	0.222164	-1.00601	0.314412	0.946612
AC008725.1	56.6483	-0.0057311	0.163173	-0.0351228	0.971982	0.996353
AC008735.1	2.03755	-0.0698199	0.877221	-0.0795922	0.936562	NA
AC008736.1	36.8671	-0.159353	0.181892	-0.876086	0.380984	0.952192
AC008738.5	0.775142	0.492707	1.34859	0.36535	0.71485	NA
AC008740.1	8.3058	0.663721	0.467428	1.41994	0.155624	NA
AC008741.1	0.407643	0.854378	1.86432	0.458278	0.646752	NA
AC008741.2	6.10293	0.958993	0.560532	1.71086	0.0871067	NA
AC008747.1	2.59796	-0.0880939	0.704613	-0.125025	0.900504	NA
AC008750.1	2.89511	0.473809	0.763902	0.620248	0.535095	NA
AC008750.2	8.74907	0.350282	0.418448	0.837097	0.402538	NA
AC008750.3	0.76947	1.0007	1.7416	0.574587	0.565571	NA
AC008750.4	2.41544	-0.254101	0.758835	-0.334856	0.737733	NA
AC008750.7	1.78513	0.65916	1.02262	0.644582	0.519198	NA
AC008752.2	0.595142	1.45535	1.51523	0.960477	0.336815	NA
AC008752.3	2.07848	0.255976	0.756534	0.338354	0.735096	NA
AC008753.1	9.71269	0.232993	0.435173	0.535404	0.59237	NA
AC008761.1	1.82821	-0.474739	0.971482	-0.488675	0.625072	NA
AC008763.1	1.41329	-0.205164	1.00728	-0.203681	0.838603	NA
AC008764.6	2.94372	0.22737	0.651612	0.348934	0.727139	NA
AC008764.8	8.99417	0.109699	0.43975	0.249457	0.803008	NA
AC008764.9	2.06077	1.75138	1.01128	1.73184	0.0833027	NA
AC008770.3	1.37549	-1.79433	1.14819	-1.56275	0.118112	NA
AC008771.1	23.6798	0.325041	0.282934	1.14882	0.250629	0.946269
AC008780.2	0.782479	0.089404	1.33723	0.0668577	0.946695	NA
AC008781.1	1.62231	-0.401176	0.914417	-0.438723	0.660862	NA
AC008799.1	1.39223	0.807042	1.27245	0.634243	0.525922	NA
AC008802.1	3.3602	-0.510298	0.613156	-0.832248	0.405269	NA
AC008813.1	5.02812	-0.620184	0.532587	-1.16448	0.244232	NA
AC008817.1	6.08316	0.764991	0.540737	1.41472	0.157151	NA
AC008840.1	0.981671	-1.53077	1.18217	-1.29488	0.195362	NA
AC008850.1	1.14396	-0.560942	1.29561	-0.432957	0.665046	NA
AC008870.2	2.84112	-0.450346	0.631488	-0.71315	0.475753	NA
AC008870.3	4.51261	-0.498435	0.506681	-0.983725	0.325251	NA
AC008875.1	1.3803	0.727299	1.14587	0.634714	0.525615	NA
AC008878.4	1.36653	0.256239	1.16597	0.219765	0.826054	NA
AC008894.2	5.13035	-0.62283	0.640919	-0.971776	0.331162	NA
AC008894.3	17.5172	-0.176587	0.297643	-0.593283	0.552992	0.959293
AC008895.1	4.11661	0.328458	0.598767	0.548557	0.58331	NA
AC008897.1	0.3357	0.732848	2.56566	0.285637	0.775156	NA
AC008897.2	2.56316	-0.34274	0.897564	-0.381856	0.702568	NA
AC008897.3	2.37994	0.892801	1.01722	0.877686	0.380114	NA
AC008906.1	4.00332	-0.471548	0.703021	-0.670746	0.502382	NA
AC008906.2	0.412002	-1.76564	1.87139	-0.943492	0.345429	NA
AC008914.1	2.02663	0.949805	0.884445	1.0739	0.282868	NA
AC008915.2	77.5004	-0.20378	0.130817	-1.55775	0.119293	0.946269
AC008937.3	1.53218	-1.27732	0.941579	-1.35657	0.174916	NA
AC008966.1	51.5059	-0.314484	0.18608	-1.69005	0.0910181	0.946269
AC008969.1	19.427	0.250231	0.256693	0.974826	0.329647	0.950511
AC008972.1	0.959076	0.260984	1.39833	0.18664	0.851943	NA
AC008972.2	7.73906	0.53258	0.426237	1.24949	0.211484	NA
AC008982.2	4.05376	0.216751	0.688507	0.314812	0.752904	NA
AC008993.2	0.395263	0.0115067	2.31961	0.00496059	0.996042	NA
AC009019.1	0.433864	-2.0122	1.62649	-1.23714	0.216036	NA
AC009022.1	10.1813	0.100389	0.358217	0.280246	0.779288	NA
AC009032.1	1.00597	1.40209	1.54166	0.909469	0.363103	NA
AC009041.2	76.0915	0.265887	0.179415	1.48197	0.138349	0.946269
AC009041.4	10.6964	-0.0530862	0.454702	-0.116749	0.907059	NA
AC009053.1	134.081	0.301037	0.153725	1.95829	0.0501964	0.899755
AC009053.2	8.81736	-0.221217	0.369706	-0.598359	0.5496	NA
AC009060.1	6.85454	-0.535214	0.513811	-1.04166	0.297571	NA
AC009061.2	25.9526	-0.39794	0.226814	-1.75447	0.0793492	0.944876
AC009065.1	4.73431	0.474573	0.621019	0.764184	0.444757	NA
AC009065.2	1.03298	-0.00490317	1.14384	-0.0042866	0.99658	NA
AC009065.4	4.83405	0.326484	0.522281	0.625111	0.531898	NA
AC009065.5	2.79444	1.70568	0.96342	1.77045	0.0766528	NA
AC009065.6	0.428524	1.09081	1.77118	0.615867	0.537983	NA
AC009078.3	8.81877	0.929094	0.493973	1.88086	0.0599909	NA
AC009086.3	4.30547	-0.559908	0.593876	-0.942803	0.345782	NA
AC009088.1	1.98353	1.10635	0.969588	1.14105	0.25385	NA
AC009088.2	8.66076	-0.548042	0.522784	-1.04831	0.294494	NA
AC009088.4	1.6571	1.89113	1.30932	1.44436	0.148638	NA
AC009090.1	0.814817	0.628853	1.56764	0.401146	0.688313	NA
AC009090.4	0.564253	0.372179	1.57075	0.236943	0.812701	NA
AC009090.5	4.20622	1.04186	0.625635	1.66529	0.0958546	NA
AC009093.4	7.26063	1.00787	0.470824	2.14066	0.0323014	NA
AC009093.6	1.01876	-0.735359	1.07421	-0.68456	0.493621	NA
AC009097.4	8.18459	-0.202855	0.450897	-0.449891	0.652789	NA
AC009102.1	0.805873	-0.246323	1.44076	-0.170967	0.86425	NA
AC009102.2	0.620781	0.278904	1.73407	0.160838	0.872221	NA
AC009107.2	1.4866	0.3706	1.02325	0.362179	0.717218	NA
AC009108.3	1.31646	-0.0112422	1.03206	-0.010893	0.991309	NA
AC009108.5	5.51916	0.46968	0.581726	0.80739	0.419442	NA
AC009113.1	39.2192	-0.238818	0.199011	-1.20002	0.23013	0.946269
AC009118.2	56.0876	-0.130413	0.194498	-0.670511	0.502532	0.958404
AC009118.3	4.70286	-0.319644	0.499538	-0.639879	0.522251	NA
AC009119.2	2.01379	0.0651602	0.892272	0.0730273	0.941784	NA
AC009120.1	2.88997	-0.692391	0.763315	-0.907085	0.364362	NA
AC009120.2	30.087	0.284078	0.302411	0.939378	0.347537	0.952192
AC009120.5	1.80795	0.272502	0.841256	0.323923	0.745996	NA
AC009121.2	1.16098	-0.979512	1.14586	-0.854824	0.392648	NA
AC009126.1	25.8463	-0.231039	0.200414	-1.15281	0.248987	0.946269
AC009127.2	0.494442	1.83838	2.07557	0.885722	0.375767	NA
AC009133.1	37.1856	-0.401427	0.245164	-1.63738	0.101551	0.946269
AC009133.2	13.0302	0.091628	0.367739	0.249166	0.803232	NA
AC009133.4	6.24669	-0.625729	0.607993	-1.02917	0.303399	NA
AC009137.1	0.379686	-0.734084	2.26465	-0.324149	0.745825	NA
AC009137.2	1.93652	0.379559	1.00589	0.377336	0.705924	NA
AC009139.1	0.434882	-0.997892	2.11045	-0.472835	0.636331	NA
AC009139.2	0.744313	-0.428725	1.37485	-0.311835	0.755166	NA
AC009148.1	1.4274	0.169263	0.961263	0.176084	0.860228	NA
AC009163.5	4.1443	2.74089	0.925551	2.96136	0.00306285	NA
AC009171.2	6.07852	-0.438643	0.431507	-1.01654	0.309374	NA
AC009220.1	0.917562	0.256012	1.25135	0.204589	0.837893	NA
AC009220.2	0.686546	0.710417	1.85764	0.382429	0.702143	NA
AC009226.1	1.55835	1.79827	1.08358	1.65956	0.0970022	NA
AC009237.14	123.157	-0.0304692	0.124299	-0.245128	0.806357	0.9822
AC009237.15	2.83667	-0.373627	0.665783	-0.561184	0.574672	NA
AC009237.3	38.6042	-0.0350519	0.18104	-0.193614	0.846478	0.985046
AC009244.1	1.66895	-0.535272	0.955685	-0.560092	0.575416	NA
AC009245.1	159.648	-0.00573162	0.157414	-0.0364111	0.970955	0.996353
AC009268.2	1.55464	1.9351	1.186	1.63162	0.10276	NA
AC009269.5	2.09901	-0.421272	1.01242	-0.416105	0.677333	NA
AC009275.1	13.1633	0.0777312	0.387432	0.200632	0.840987	NA
AC009283.1	3.72325	-0.133094	0.591515	-0.225005	0.821975	NA
AC009292.1	1.56906	-0.238382	1.04454	-0.228217	0.819478	NA
AC009299.1	0.604748	1.7378	1.65224	1.05178	0.292898	NA
AC009299.2	32.6721	-0.0855828	0.183132	-0.467329	0.640264	0.967692
AC009302.1	4.20822	0.597657	0.541514	1.10368	0.269732	NA
AC009303.2	0.540823	-1.38042	1.73574	-0.79529	0.426445	NA
AC009303.4	15.8496	-0.0768653	0.300292	-0.255968	0.797975	0.9822
AC009309.1	19.53	0.237085	0.31613	0.749958	0.45328	0.952966
AC009318.1	1.58119	-0.646181	1.07979	-0.598434	0.54955	NA
AC009318.2	5.44855	-0.805859	0.447485	-1.80086	0.0717248	NA
AC009318.3	5.73689	-0.179472	0.476233	-0.376858	0.706279	NA
AC009319.1	0.941006	-1.06276	1.36233	-0.780104	0.435329	NA
AC009336.1	0.764645	0.614915	1.28826	0.477323	0.633132	NA
AC009336.2	0.491736	-0.479567	2.0216	-0.237222	0.812485	NA
AC009362.1	18.1157	0.189652	0.367222	0.51645	0.60554	0.963529
AC009403.1	22.1137	0.290375	0.268539	1.08132	0.279557	0.946269
AC009403.2	4.03184	0.657592	0.678448	0.96926	0.332415	NA
AC009404.1	5.91718	0.484668	0.524413	0.92421	0.355377	NA
AC009413.1	12.4591	-0.128373	0.346869	-0.370091	0.711314	NA
AC009414.2	185.429	-0.246968	0.0972481	-2.53956	0.0110991	0.723637
AC009486.1	2.00884	0.78552	0.764689	1.02724	0.304307	NA
AC009487.2	50.0684	0.203477	0.179616	1.13284	0.25728	0.946269
AC009501.1	2.30176	-0.595276	0.821595	-0.724537	0.468736	NA
AC009502.1	0.425548	0.379024	2.40257	0.157758	0.874648	NA
AC009506.1	31.5036	0.121489	0.20874	0.58201	0.56056	0.959293
AC009509.1	0.486342	0.795504	4.36495	0.182248	0.855388	NA
AC009509.4	0.835744	2.30444	1.66732	1.38212	0.166934	NA
AC009511.2	1.81778	-1.23952	0.880128	-1.40834	0.159031	NA
AC009533.1	151.553	0.302848	0.149114	2.03098	0.0422574	0.886912
AC009549.1	26.6569	1.31026	0.468565	2.79631	0.00516892	0.584516
AC009570.1	9.61156	0.00949452	0.388752	0.024423	0.980515	NA
AC009630.1	9.12168	-0.206594	0.451661	-0.45741	0.647377	NA
AC009630.2	4.80075	-0.130165	0.584064	-0.222861	0.823644	NA
AC009630.3	6.36389	-0.313701	0.504311	-0.62204	0.533916	NA
AC009652.2	1.61614	0.584728	0.771035	0.758368	0.448231	NA
AC009686.2	0.715312	0.152149	1.52288	0.0999084	0.920417	NA
AC009690.2	8.38845	-0.555672	0.387074	-1.43557	0.151125	NA
AC009704.2	0.608857	2.59401	1.50974	1.71818	0.0857638	NA
AC009720.1	17.6921	-0.222195	0.271074	-0.819684	0.412396	0.952192
AC009779.1	0.351643	0	4.8388	0	1	NA
AC009779.2	136.348	0.0196679	0.153883	0.127811	0.898299	0.992143
AC009779.3	1.62399	-1.22119	0.787819	-1.55009	0.12112	NA
AC009802.1	3.29879	0.0433681	0.75055	0.0577817	0.953923	NA
AC009804.1	0.884968	-0.799532	1.18303	-0.675833	0.499147	NA
AC009812.1	27.4086	0.242842	0.253891	0.95648	0.33883	0.951723
AC009812.4	5.25887	-0.0114215	0.570401	-0.0200236	0.984025	NA
AC009831.1	19.6337	-0.200937	0.328252	-0.612145	0.540442	0.959293
AC009878.1	3.7827	-0.800237	0.611504	-1.30864	0.190657	NA
AC009902.2	2.38476	-0.102929	0.768888	-0.133867	0.893508	NA
AC009902.3	0.570132	1.05265	1.83649	0.573185	0.56652	NA
AC009927.1	3.92795	0.160058	0.718885	0.222647	0.82381	NA
AC009945.1	1.13926	0.693143	1.23449	0.561483	0.574468	NA
AC009948.1	42.4434	0.0438614	0.166535	0.263377	0.79226	0.9822
AC009948.2	15.8625	-0.132918	0.287091	-0.462981	0.643378	0.967692
AC009948.3	17.3573	0.255608	0.291063	0.878187	0.379842	0.952192
AC009948.4	9.80415	0.517241	0.410364	1.26044	0.207509	NA
AC009948.5	0.371765	0.970469	2.8475	0.340815	0.733243	NA
AC009955.1	0.468002	0.217268	1.93931	0.112033	0.910797	NA
AC009955.4	1.029	0.847461	1.13187	0.748724	0.454024	NA
AC009961.1	11.2986	0.204276	0.392572	0.520354	0.602817	NA
AC009962.1	14.7012	0.0551618	0.303267	0.181892	0.855668	0.98735
AC009963.3	1.59256	-1.00216	1.09019	-0.919248	0.357966	NA
AC009996.1	2.29207	0.749391	0.89985	0.832796	0.40496	NA
AC010095.1	1.41801	-1.89535	1.0813	-1.75285	0.0796276	NA
AC010132.2	0.700884	-0.137583	1.41088	-0.0975157	0.922317	NA
AC010148.1	0.882158	-0.236201	1.18332	-0.199608	0.841787	NA
AC010168.2	3.64011	2.77437	0.964299	2.87709	0.00401361	NA
AC010173.1	19.0376	-0.0864259	0.309967	-0.278823	0.780381	0.98038
AC010182.1	0.585299	1.31199	1.45756	0.900126	0.368053	NA
AC010186.1	0.581313	-0.187577	2.09105	-0.0897051	0.928522	NA
AC010186.2	25.3454	-0.603564	0.297833	-2.02652	0.0427116	0.886912
AC010186.3	4.10801	-0.593643	0.505265	-1.17491	0.240029	NA
AC010198.1	2.39015	-0.827063	0.693004	-1.19345	0.232695	NA
AC010200.1	1.82331	1.96911	1.09513	1.79806	0.0721672	NA
AC010201.2	0.807553	-0.826588	1.13677	-0.727139	0.467141	NA
AC010203.1	5.16761	-0.185564	0.505852	-0.366834	0.713743	NA
AC010203.2	0.745958	-0.981484	1.71091	-0.573661	0.566197	NA
AC010207.1	1.54778	-0.652124	0.830448	-0.785268	0.432297	NA
AC010210.1	1.04536	-0.941378	1.3617	-0.691327	0.48936	NA
AC010226.1	5.6098	0.0468374	0.493545	0.0948999	0.924394	NA
AC010235.1	1.03497	0.595491	1.22319	0.486834	0.626376	NA
AC010240.1	34.1374	-0.211312	0.228093	-0.926428	0.354224	0.952192
AC010240.2	3.15597	-0.0521431	0.636073	-0.0819766	0.934665	NA
AC010240.3	0.856948	0.16617	1.29917	0.127905	0.898224	NA
AC010245.2	3.38651	1.14186	0.768084	1.48663	0.137113	NA
AC010247.2	0.349548	0.0115057	2.07049	0.00555701	0.995566	NA
AC010260.1	0.418051	0.0115043	1.74898	0.00657772	0.994752	NA
AC010271.2	0.343692	0.37168	2.05249	0.181088	0.856299	NA
AC010273.1	8.61127	0.0280822	0.414717	0.0677141	0.946013	NA
AC010306.1	4.03749	0.397585	0.59881	0.66396	0.506716	NA
AC010320.2	3.26708	0.237234	0.648318	0.365923	0.714423	NA
AC010325.1	0.704732	-0.562895	1.28512	-0.438011	0.661378	NA
AC010326.4	32.8536	-0.00700925	0.200666	-0.0349299	0.972136	0.996353
AC010327.2	0.903065	-2.81166	1.26038	-2.2308	0.0256943	NA
AC010327.3	11.6626	0.237238	0.545985	0.434514	0.663915	NA
AC010327.4	5.09516	0.323823	0.503366	0.643316	0.520019	NA
AC010327.5	25.5005	0.189919	0.23245	0.817032	0.41391	0.952192
AC010328.2	14.367	0.136741	0.312682	0.437317	0.661882	0.968658
AC010331.1	9.9269	-0.202667	0.423153	-0.478946	0.631977	NA
AC010332.2	7.19377	0.674122	0.450705	1.4957	0.134731	NA
AC010335.1	0.602717	-0.379141	1.57881	-0.240143	0.810219	NA
AC010335.3	0.469142	0.0115054	1.73949	0.00661428	0.994723	NA
AC010336.1	4.69917	-0.198429	0.710933	-0.279111	0.78016	NA
AC010336.2	1.61127	0.0492525	0.78776	0.0625222	0.950147	NA
AC010336.4	0.954618	-0.722769	1.09869	-0.657846	0.510637	NA
AC010336.5	9.42528	-0.562195	0.466862	-1.2042	0.228512	NA
AC010342.1	86.0781	-0.0269744	0.128099	-0.210575	0.833219	0.983943
AC010343.1	3840.98	-0.049458	0.0428365	-1.15458	0.248264	0.946269
AC010343.2	233.201	-0.0486562	0.0772666	-0.629719	0.528879	0.959034
AC010343.3	1.89482	-0.177465	0.921184	-0.192648	0.847234	NA
AC010350.1	3.13525	-1.36202	0.650607	-2.09346	0.0363081	NA
AC010359.1	23.3287	0.153272	0.293395	0.522408	0.601386	0.963529
AC010374.2	8.79697	0.442539	0.380593	1.16276	0.244926	NA
AC010385.1	0.343903	-0.932086	1.97427	-0.472116	0.636844	NA
AC010401.1	1.43255	0.128817	1.13002	0.113996	0.909241	NA
AC010409.2	0.369693	-0.623716	1.95666	-0.318767	0.749904	NA
AC010422.1	1.27958	0.21097	1.06096	0.198849	0.842381	NA
AC010422.6	5.22845	-0.763125	0.477935	-1.59671	0.110329	NA
AC010435.1	3.35909	-0.319687	0.593936	-0.538251	0.590404	NA
AC010442.3	0.639984	0.314321	1.4005	0.224436	0.822418	NA
AC010457.1	2.78708	1.17	0.790795	1.47952	0.139001	NA
AC010460.3	2.53317	0.0166485	0.717378	0.0232075	0.981485	NA
AC010463.3	0.702511	-1.13579	1.52461	-0.744973	0.456288	NA
AC010468.1	95.9179	-0.0904081	0.144831	-0.624233	0.532474	0.959293
AC010469.1	2.4964	-0.110142	0.766412	-0.143711	0.885728	NA
AC010487.1	3.71954	0.637172	0.720506	0.884339	0.376513	NA
AC010487.2	0.436052	-1.98456	1.96123	-1.01189	0.31159	NA
AC010491.1	3.935	0.22188	0.612059	0.362514	0.716968	NA
AC010501.1	12.2586	0.148432	0.36494	0.406729	0.684207	NA
AC010503.4	0.568264	1.47513	2.12309	0.694801	0.48718	NA
AC010504.1	1.4469	-0.452413	0.997558	-0.45352	0.650174	NA
AC010530.1	0.440751	-0.573887	1.92707	-0.297803	0.765853	NA
AC010531.2	0.356362	-0.352239	2.50072	-0.140855	0.887985	NA
AC010531.6	25.6882	-0.558868	0.211638	-2.64068	0.00827402	0.648132
AC010536.1	29.447	0.272972	0.205595	1.32771	0.184273	0.946269
AC010536.2	2.85905	4.2983	1.14607	3.75047	0.000176502	NA
AC010536.3	3.88353	1.25343	0.623324	2.01089	0.0443373	NA
AC010542.2	0.640035	-1.53526	1.59484	-0.962645	0.335726	NA
AC010542.4	1.05554	0.540038	1.16988	0.461618	0.644355	NA
AC010542.5	0.472289	-2.4197	1.95664	-1.23666	0.216214	NA
AC010547.1	0.857325	0.691666	1.54911	0.446492	0.655242	NA
AC010605.1	5.74266	-0.688888	0.49265	-1.39833	0.162014	NA
AC010615.1	0.600591	-0.355481	1.33058	-0.267162	0.789344	NA
AC010615.2	15.3514	-0.33788	0.325137	-1.03919	0.298715	0.946269
AC010615.3	1.23999	-1.12166	1.08172	-1.03693	0.299771	NA
AC010616.1	14.7138	0.185501	0.369924	0.501456	0.616051	0.963767
AC010618.3	27.0281	0.0729419	0.236731	0.308122	0.75799	0.97951
AC010624.1	0.435118	-1.87764	1.84928	-1.01533	0.309948	NA
AC010624.3	0.391275	0.37218	1.87734	0.198249	0.84285	NA
AC010632.1	0.721308	1.30571	1.48224	0.8809	0.378372	NA
AC010632.3	1.74343	0.658537	0.853272	0.771779	0.440246	NA
AC010642.2	49.04	0.202299	0.178022	1.13637	0.255803	0.946269
AC010653.1	0.353461	0.0115036	2.04139	0.00563519	0.995504	NA
AC010653.2	0.579802	-0.159586	1.49724	-0.106587	0.915116	NA
AC010653.3	31.9643	-0.14359	0.340689	-0.42147	0.673412	0.970246
AC010654.1	5.28034	-0.272904	0.514377	-0.530553	0.595729	NA
AC010677.1	3.54976	-0.345882	0.686942	-0.50351	0.614606	NA
AC010680.2	19.9958	0.320099	0.280526	1.14107	0.253841	0.946269
AC010680.3	10.2825	0.720173	0.389353	1.84967	0.0643615	NA
AC010680.4	1.13633	1.00946	1.33738	0.754808	0.450364	NA
AC010733.1	3.77583	-0.368944	0.594832	-0.620249	0.535094	NA
AC010735.1	6.90005	-0.117065	0.470048	-0.249048	0.803323	NA
AC010735.2	19.5102	0.153146	0.26204	0.584437	0.558927	0.959293
AC010761.1	46.2119	-0.906433	0.371392	-2.44064	0.0146614	0.766335
AC010761.5	0.461512	1.87111	1.67019	1.1203	0.262585	NA
AC010761.6	0.831708	0.181155	1.67462	0.108176	0.913856	NA
AC010809.1	12.4226	0.199963	0.390309	0.51232	0.608427	NA
AC010809.2	7.85598	0.851099	0.436101	1.95161	0.0509848	NA
AC010834.2	1.23056	0.0323696	0.884171	0.0366101	0.970796	NA
AC010834.3	0.444994	0.360974	1.6065	0.224696	0.822216	NA
AC010864.1	12.3456	0.410073	0.395383	1.03715	0.299664	NA
AC010878.1	16.076	-0.174725	0.32165	-0.543216	0.586981	0.962976
AC010883.1	5.62638	0.194434	0.507388	0.383206	0.701567	NA
AC010884.1	0.559528	-2.8052	1.51035	-1.85732	0.0632651	NA
AC010890.1	0.480385	-1.31572	4.21357	-0.312256	0.754846	NA
AC010894.1	5.59455	-0.57059	0.489387	-1.16593	0.243643	NA
AC010894.2	2.43334	0.474588	0.764893	0.620464	0.534952	NA
AC010900.1	6.36195	0.493897	0.481093	1.02662	0.304601	NA
AC010904.1	2.69906	-0.257866	0.668457	-0.385763	0.699672	NA
AC010913.1	24.907	-0.257305	0.235116	-1.09437	0.273791	0.946269
AC010931.1	1.41424	-0.136939	0.855418	-0.160084	0.872815	NA
AC010931.2	0.467669	1.12341	1.9311	0.581746	0.560738	NA
AC010969.2	41.3057	-0.324517	0.19733	-1.64454	0.100065	0.946269
AC010973.2	10.6631	0.0163357	0.424085	0.0385198	0.969273	NA
AC010976.1	2.7989	-0.093336	0.690937	-0.135086	0.892544	NA
AC010978.1	2.57318	-0.655461	0.749723	-0.874271	0.381971	NA
AC010983.1	3.46945	-0.595348	0.6687	-0.890307	0.373301	NA
AC010997.4	0.629387	-0.678437	1.32563	-0.511785	0.608802	NA
AC010999.2	2.77874	0.597422	0.883836	0.675941	0.499078	NA
AC010999.3	38.183	-0.484942	0.194091	-2.49853	0.0124708	0.731916
AC011005.1	140.367	0.050877	0.114896	0.442807	0.657905	0.968657
AC011008.1	0.522519	-1.76516	1.80923	-0.975642	0.329242	NA
AC011195.2	1.09884	-0.474024	1.07343	-0.441599	0.658779	NA
AC011242.1	0.461415	0.0115069	2.07041	0.00555778	0.995566	NA
AC011247.2	0.417565	-1.04287	1.80196	-0.578741	0.562764	NA
AC011270.1	30.0085	-0.205632	0.2148	-0.95732	0.338406	0.951723
AC011290.1	1.21583	0.932364	1.11191	0.838524	0.401737	NA
AC011290.2	0.949272	-0.642859	1.01385	-0.634077	0.526031	NA
AC011330.1	1.64544	-0.536574	0.838438	-0.639968	0.522193	NA
AC011330.2	3.75406	0.0205075	0.57938	0.0353956	0.971764	NA
AC011337.1	0.926703	-0.498146	1.1746	-0.424099	0.671494	NA
AC011369.2	6.0327	0.73421	0.549621	1.33585	0.181599	NA
AC011374.2	0.416071	2.09064	2.04559	1.02202	0.30677	NA
AC011379.2	12.913	0.195241	0.331113	0.589651	0.555424	NA
AC011405.1	1.52825	0.715556	1.06217	0.673676	0.500517	NA
AC011406.1	0.559441	-1.99033	1.56229	-1.27398	0.202672	NA
AC011411.1	0.502911	-1.85667	1.68664	-1.10081	0.270979	NA
AC011416.3	3.18239	-0.233607	0.614129	-0.380387	0.703658	NA
AC011431.1	0.325889	-1.78706	2.5209	-0.708898	0.478388	NA
AC011444.1	4.97965	-0.0251579	0.487007	-0.0516582	0.958801	NA
AC011444.4	0.79175	0.295016	1.37561	0.214462	0.830187	NA
AC011445.1	1.41238	-0.430862	1.14193	-0.377311	0.705943	NA
AC011445.2	19.5509	-0.344237	0.381582	-0.902131	0.366987	0.952192
AC011446.1	1.33769	-0.638597	0.884944	-0.721625	0.470525	NA
AC011446.2	16.905	-0.961737	0.45958	-2.09264	0.036381	0.867669
AC011447.3	2.53747	-1.41589	0.69208	-2.04585	0.0407715	NA
AC011447.7	0.750267	0.578489	1.62667	0.355628	0.722119	NA
AC011448.1	4.69992	0.560465	0.633712	0.884416	0.376472	NA
AC011450.1	0.750245	2.36419	1.59997	1.47765	0.139502	NA
AC011455.2	2.0497	-0.166789	1.08428	-0.153825	0.877748	NA
AC011462.4	1.96566	0.412831	0.870553	0.474217	0.635345	NA
AC011466.1	0.817885	-0.371898	1.4759	-0.251981	0.801056	NA
AC011466.3	0.674637	-0.337728	1.58837	-0.212625	0.83162	NA
AC011468.1	2.98189	0.544414	0.729276	0.746513	0.455358	NA
AC011468.4	1.16777	-0.324487	1.3748	-0.236024	0.813414	NA
AC011468.5	3.97917	0.304154	0.66029	0.460637	0.645059	NA
AC011472.1	0.553955	-1.39532	1.49764	-0.931681	0.351501	NA
AC011476.3	1.59861	0.627143	0.895179	0.700579	0.483566	NA
AC011477.1	8.77855	-0.101542	0.404205	-0.251215	0.801648	NA
AC011477.2	1.16969	0.582953	1.26269	0.461677	0.644313	NA
AC011481.2	0.646041	1.64131	1.66311	0.986888	0.323698	NA
AC011481.3	0.779061	1.34707	1.36824	0.984524	0.324858	NA
AC011487.1	0.377465	-0.893175	1.93118	-0.462502	0.643721	NA
AC011487.3	5.42192	0.559058	0.532201	1.05047	0.293504	NA
AC011491.2	0.60072	2.03185	1.59864	1.27098	0.203734	NA
AC011492.1	4.36387	0.081556	0.513232	0.158907	0.873742	NA
AC011495.1	82.6879	0.0252561	0.241344	0.104647	0.916656	0.993297
AC011495.3	0.682149	1.7306	4.82189	0.358906	0.719665	NA
AC011497.2	67.9694	0.232718	0.14946	1.55706	0.119456	0.946269
AC011498.1	0.807562	0.0958959	1.33519	0.071822	0.942744	NA
AC011498.2	5.86966	-0.24888	0.599686	-0.415016	0.67813	NA
AC011498.3	0.516188	-0.504459	4.7935	-0.105238	0.916187	NA
AC011498.6	5.45268	-1.04852	0.559999	-1.87237	0.0611554	NA
AC011498.7	14.2438	0.175438	0.354627	0.49471	0.620805	0.964874
AC011500.3	1.858	0.78778	0.910775	0.864956	0.387063	NA
AC011503.1	1.32299	-0.719145	0.926995	-0.77578	0.437879	NA
AC011506.1	3.13971	0.417156	0.777681	0.53641	0.591675	NA
AC011510.1	0.604638	-0.614869	1.63193	-0.376774	0.706342	NA
AC011511.2	4.15625	-2.18381	0.585954	-3.72694	0.00019382	NA
AC011511.3	1.54317	-0.405186	1.04712	-0.386952	0.698792	NA
AC011511.5	2.00342	-0.50428	0.934324	-0.539727	0.589385	NA
AC011558.1	0.569946	0.414162	1.61275	0.256805	0.797329	NA
AC011591.1	9.89597	0.0315089	0.425531	0.0740461	0.940974	NA
AC011595.2	1.57827	0.212601	0.989794	0.214793	0.829928	NA
AC011603.1	1.0306	0.314802	1.30011	0.242135	0.808676	NA
AC011603.2	171.501	-0.458205	0.192955	-2.37468	0.0175644	0.7927
AC011604.2	2.70511	-0.15731	0.734827	-0.214078	0.830487	NA
AC011611.1	0.441587	0.0505633	1.67633	0.0301631	0.975937	NA
AC011611.2	0.60494	0.333457	1.47977	0.225344	0.821711	NA
AC011611.3	27.8868	-0.0918893	0.313445	-0.293159	0.7694	0.979714
AC011611.4	20.3096	-0.218734	0.321705	-0.679921	0.496554	0.958404
AC011611.5	1.8151	-0.471261	0.875714	-0.538145	0.590477	NA
AC011676.1	1.47129	-0.656717	0.959932	-0.684128	0.493894	NA
AC011676.5	0.469029	0.732851	4.39865	0.166608	0.867678	NA
AC011726.1	2.04321	0.743362	1.01338	0.73355	0.463223	NA
AC011731.1	1.39904	-2.20201	0.94635	-2.32685	0.0199734	NA
AC011767.1	0.347732	-1.04082	2.93492	-0.354633	0.722865	NA
AC011773.1	0.308205	1.86834	2.59752	0.719279	0.471969	NA
AC011773.4	1.05876	-0.524083	1.09093	-0.4804	0.630943	NA
AC011815.1	3.98003	-0.283356	0.71942	-0.393868	0.693679	NA
AC011825.1	0.600879	-0.822078	1.68306	-0.488443	0.625236	NA
AC011825.4	7.41666	0.0301598	0.428823	0.0703316	0.94393	NA
AC011890.1	2.37401	0.70662	0.768186	0.919856	0.357648	NA
AC011912.1	2.95737	-0.567631	0.72962	-0.777982	0.436579	NA
AC011921.1	3.29148	-0.189888	0.721061	-0.263346	0.792284	NA
AC011921.3	6.58195	0.504993	0.469644	1.07527	0.282255	NA
AC011933.1	8.99583	0.471324	0.405011	1.16373	0.244532	NA
AC011933.3	1.52441	0.759779	1.07098	0.709425	0.478061	NA
AC011939.1	2.9954	0.427567	0.818098	0.522635	0.601228	NA
AC011939.3	0.546249	2.3206	1.78159	1.30255	0.192729	NA
AC011978.1	3.63549	1.04773	0.702073	1.49234	0.135609	NA
AC011978.2	8.09536	-0.0110558	0.388882	-0.0284298	0.977319	NA
AC011979.1	6.51373	-0.449463	0.415088	-1.08281	0.278892	NA
AC011998.1	1109.12	-0.0241568	0.0560675	-0.430851	0.666576	0.969509
AC012005.1	26.8239	0.0154589	0.307696	0.0502409	0.95993	0.99557
AC012020.1	0.3683	-0.0974519	2.29892	-0.0423902	0.966188	NA
AC012044.1	1.04816	-0.55527	0.994784	-0.558181	0.57672	NA
AC012065.2	0.354174	0.372176	1.73882	0.214039	0.830517	NA
AC012065.4	0.990433	0.921205	1.3567	0.679003	0.497136	NA
AC012065.5	48.632	-0.132333	0.227787	-0.58095	0.561274	0.959293
AC012066.1	35.7225	-0.323762	0.184913	-1.75089	0.0799656	0.945613
AC012073.1	52.6085	0.146421	0.191891	0.763044	0.445437	0.952296
AC012074.1	1.48681	-0.0188052	1.01871	-0.0184599	0.985272	NA
AC012085.1	83.2108	-0.0199308	0.210237	-0.094802	0.924472	0.993553
AC012123.1	10.4522	0.00619492	0.431645	0.0143519	0.988549	NA
AC012146.1	211.621	-0.0629119	0.0917422	-0.685746	0.492873	0.958404
AC012146.3	0.64356	1.02393	2.02757	0.505002	0.613557	NA
AC012170.1	0.408416	-1.33525	1.90343	-0.7015	0.482991	NA
AC012170.2	0.642412	-1.58112	1.8605	-0.849838	0.395415	NA
AC012170.3	0.460716	-1.00032	1.73933	-0.575117	0.565212	NA
AC012173.1	3.35285	0.0184868	0.673706	0.0274404	0.978108	NA
AC012181.1	1.24122	0.590741	1.28236	0.460668	0.645037	NA
AC012182.1	0.377095	1.73974	2.26491	0.768124	0.442413	NA
AC012184.1	2.79602	-0.840323	0.656005	-1.28097	0.200205	NA
AC012184.3	15.9815	-0.297305	0.286705	-1.03697	0.29975	0.946269
AC012236.1	0.798505	-0.281532	1.22532	-0.229762	0.818277	NA
AC012306.2	75.2761	0.0252643	0.151356	0.16692	0.867433	0.989604
AC012308.1	1.38103	0.60586	0.906573	0.668297	0.503944	NA
AC012313.1	221.319	-0.214122	0.124184	-1.72423	0.0846664	0.946269
AC012313.10	2.1594	1.16327	0.963688	1.2071	0.227394	NA
AC012313.2	20.2343	0.0348204	0.341601	0.101933	0.91881	0.993297
AC012313.3	1.68306	-0.885857	0.868437	-1.02006	0.307701	NA
AC012313.4	4.53964	0.871068	0.675936	1.28868	0.197508	NA
AC012313.6	2.39212	0.0586732	0.844931	0.0694413	0.944638	NA
AC012313.7	2.23294	0.338471	1.03722	0.326323	0.74418	NA
AC012313.8	4.1987	-0.73545	0.561719	-1.30928	0.190438	NA
AC012313.9	2.94274	-0.300396	0.813618	-0.36921	0.711971	NA
AC012354.1	0.514153	-0.0284373	1.90204	-0.014951	0.988071	NA
AC012354.2	303.664	0.121879	0.0845068	1.44224	0.149235	0.946269
AC012354.3	0.458139	1.46272	1.85809	0.787217	0.431155	NA
AC012358.2	22.4087	-0.316558	0.276764	-1.14378	0.252714	0.946269
AC012358.3	3.94863	-0.677587	0.5273	-1.28501	0.198788	NA
AC012360.1	5.92997	0.393656	0.483901	0.813506	0.415928	NA
AC012360.2	4.44877	-0.429813	0.671003	-0.640554	0.521813	NA
AC012360.3	18.4476	-0.175032	0.280771	-0.623397	0.533024	0.959293
AC012370.1	2.34707	-0.139483	0.958524	-0.145519	0.884301	NA
AC012377.1	1.80159	1.73391	1.10472	1.56954	0.116522	NA
AC012414.5	2.14999	0.448846	0.739629	0.606853	0.543948	NA
AC012414.7	0.64832	-0.830105	1.66805	-0.497649	0.618732	NA
AC012435.2	0.379534	1.01163	1.89062	0.535081	0.592594	NA
AC012441.1	1.68818	0.0558255	0.91516	0.0610007	0.951359	NA
AC012441.2	2.98235	0.119632	0.730509	0.163765	0.869916	NA
AC012447.1	2.00648	0.243478	0.779349	0.312412	0.754727	NA
AC012456.2	3.58058	0.631882	0.674564	0.936726	0.348899	NA
AC012464.2	0.373601	0.544123	2.03563	0.2673	0.789238	NA
AC012467.2	24.2089	-0.262398	0.236587	-1.10909	0.26739	0.946269
AC012485.1	3.32442	-0.425514	0.564445	-0.753863	0.450932	NA
AC012485.3	1.00238	-0.397794	1.31488	-0.302534	0.762245	NA
AC012493.1	1.0463	-0.238349	1.21852	-0.195604	0.84492	NA
AC012498.1	1.94995	0.262386	1.00063	0.262222	0.793151	NA
AC012507.1	0.537048	0.441714	1.69118	0.261187	0.793949	NA
AC012508.1	0.714724	-0.332407	1.17741	-0.282321	0.777698	NA
AC012508.2	0.402032	0.0367957	2.2941	0.0160393	0.987203	NA
AC012510.1	35.7217	0.266384	0.18594	1.43263	0.151963	0.946269
AC012513.2	0.955219	-0.302608	1.35918	-0.22264	0.823815	NA
AC012513.3	10.7666	0.368752	0.390542	0.944207	0.345064	NA
AC012531.1	18.6603	0.42744	0.430801	0.992198	0.321101	0.946916
AC012531.4	0.44365	-0.174593	2.09365	-0.0833916	0.93354	NA
AC012531.5	0.425808	0.281473	2.42107	0.11626	0.907447	NA
AC012555.1	9.19869	0.202754	0.389627	0.520381	0.602798	NA
AC012557.1	0.739461	-0.776522	1.19191	-0.651495	0.514727	NA
AC012569.1	5.34809	-0.965116	0.53841	-1.79253	0.0730482	NA
AC012603.1	1.82543	-1.92345	0.872798	-2.20378	0.0275399	NA
AC012615.1	28.8598	0.19104	0.270558	0.706096	0.480128	0.955748
AC012615.2	0.768555	-1.04188	1.34404	-0.775187	0.438229	NA
AC012615.3	0.683355	1.29866	1.66254	0.781128	0.434727	NA
AC012615.5	0.361533	-2.4375	2.11335	-1.15338	0.248754	NA
AC012615.6	1.98676	0.906073	0.904009	1.00228	0.316207	NA
AC012618.1	8.24209	0.195179	0.422127	0.46237	0.643816	NA
AC012618.2	1.42655	0.361812	1.03456	0.349725	0.726545	NA
AC012618.3	2.67313	-0.0125553	0.735036	-0.0170811	0.986372	NA
AC012625.1	42.2854	0.0180516	0.214267	0.0842485	0.932859	0.993749
AC012629.2	3.38392	-0.264774	0.634086	-0.417569	0.676262	NA
AC012636.1	0.433256	-0.349166	2.03157	-0.171869	0.86354	NA
AC012640.1	0.729492	0.657565	1.54806	0.424768	0.671006	NA
AC012640.2	21.8897	0.0217277	0.24806	0.0875903	0.930202	0.993749
AC012640.4	32.1975	-0.171356	0.253388	-0.676258	0.498877	0.958404
AC012645.1	0.831131	0.877992	1.60951	0.545504	0.585407	NA
AC012645.3	0.52222	1.74292	2.18612	0.797267	0.425296	NA
AC012676.1	27.1551	-0.0746908	0.30502	-0.244872	0.806555	0.9822
AC012676.3	0.448794	0.732852	1.90221	0.385262	0.700043	NA
AC012676.5	7.46623	1.35926	0.573034	2.37205	0.0176899	NA
AC013268.3	4.56556	0.697011	0.749502	0.929966	0.352389	NA
AC013270.1	1.23627	1.27245	1.15438	1.10227	0.270344	NA
AC013275.1	0.560663	-2.13003	1.56116	-1.36439	0.172446	NA
AC013355.1	1.48889	-0.0507995	0.995556	-0.0510263	0.959305	NA
AC013356.1	5.38154	0.503551	0.521585	0.965425	0.334332	NA
AC013356.2	0.533725	-2.08883	1.58159	-1.32071	0.186596	NA
AC013394.1	0.905009	0.11333	1.29959	0.0872041	0.930509	NA
AC013400.1	1.83397	1.0412	1.00715	1.0338	0.301227	NA
AC013403.2	1.1418	-1.07856	1.10164	-0.979048	0.327556	NA
AC013451.2	4.80311	-0.449253	0.53184	-0.844715	0.39827	NA
AC013470.2	1.57435	-0.24025	0.893131	-0.268998	0.787931	NA
AC013470.3	7.21598	-0.344426	0.458222	-0.751658	0.452257	NA
AC013472.3	1.19768	0.405538	1.10381	0.367397	0.713323	NA
AC013489.3	1.86708	-2.48595	0.926622	-2.68281	0.00730062	NA
AC013565.3	0.855486	2.01978	1.54347	1.3086	0.190671	NA
AC013652.1	43.4069	-0.112543	0.239829	-0.469264	0.638881	0.967692
AC013731.1	0.421972	-1.86697	1.78786	-1.04425	0.296371	NA
AC015656.1	0.433791	-1.44937	1.92174	-0.754196	0.450731	NA
AC015674.1	85.3049	-0.0630328	0.181392	-0.347495	0.728219	0.976599
AC015689.2	12.9181	0.20003	0.299063	0.668856	0.503588	NA
AC015712.1	5.68932	-0.090099	0.477214	-0.188802	0.850248	NA
AC015712.2	126.795	-0.140171	0.131779	-1.06368	0.287474	0.946269
AC015712.6	32.2701	0.135818	0.260705	0.520966	0.60239	0.963529
AC015712.7	1.065	1.73044	1.35595	1.27619	0.201889	NA
AC015720.2	1.22199	0.940223	1.28809	0.729933	0.465431	NA
AC015726.1	1.31263	1.50996	1.22788	1.22972	0.218801	NA
AC015726.2	0.500497	0.448834	1.61606	0.277733	0.781217	NA
AC015743.1	1.36396	0.228817	1.38074	0.165721	0.868377	NA
AC015795.1	0.561865	-0.790947	1.47398	-0.536607	0.591539	NA
AC015799.1	0.461306	-2.06486	1.5354	-1.34484	0.178678	NA
AC015802.4	1.07963	1.89708	1.44539	1.3125	0.18935	NA
AC015802.6	4.11154	-0.246095	0.56425	-0.436146	0.662731	NA
AC015813.1	108.376	0.61687	0.290571	2.12296	0.0337574	0.854226
AC015813.4	0.989524	0.875766	1.26703	0.691194	0.489444	NA
AC015813.5	87.6755	-0.0761445	0.128812	-0.591128	0.554434	0.959293
AC015813.6	4.32205	0.0544168	0.665386	0.0817822	0.93482	NA
AC015818.2	0.351415	0.931075	2.50798	0.371245	0.710455	NA
AC015818.6	0.377392	-1.65676	1.92022	-0.862799	0.388248	NA
AC015819.1	0.438084	0.708983	4.24576	0.166986	0.867381	NA
AC015819.2	0.448678	-0.223121	1.907	-0.117001	0.906859	NA
AC015849.5	13.8964	0.0403757	0.41005	0.0984654	0.921563	0.993297
AC015849.6	16.0348	0.60246	0.370811	1.62471	0.104224	0.946269
AC015871.3	16.9943	0.269301	0.270241	0.996523	0.318996	0.946916
AC015909.1	0.554075	-0.551588	1.65783	-0.332717	0.739348	NA
AC015909.2	1.83237	0.974615	1.02098	0.954591	0.339785	NA
AC015909.5	4.65256	-0.247729	0.558616	-0.443469	0.657426	NA
AC015911.1	17.7952	0.703395	0.341692	2.05857	0.0395359	0.87412
AC015911.4	6.42988	0.313181	0.514817	0.608334	0.542966	NA
AC015911.7	1.07865	0.319175	1.03932	0.307099	0.758768	NA
AC015912.1	0.624739	-2.56595	1.72999	-1.48322	0.138016	NA
AC015912.3	44.2385	0.61751	0.40572	1.52201	0.128006	0.946269
AC015917.2	0.889198	-1.00627	1.27008	-0.79229	0.428192	NA
AC015921.1	0.590059	-0.356263	1.56372	-0.227831	0.819778	NA
AC015922.3	0.336745	-0.349163	2.29023	-0.152458	0.878826	NA
AC015922.4	157.228	0.0514956	0.134461	0.382979	0.701735	0.973468
AC015936.1	0.692899	1.13624	4.62113	0.245879	0.805776	NA
AC015971.1	6.135	-0.390732	0.471735	-0.828286	0.407508	NA
AC015977.1	1.60494	-0.707569	1.15961	-0.61018	0.541742	NA
AC015982.1	21.5353	0.151568	0.26489	0.57219	0.567193	0.960209
AC016026.1	0.763523	1.03832	1.42471	0.728792	0.466129	NA
AC016027.1	32.9084	-0.107441	0.222577	-0.482716	0.629297	0.96654
AC016065.1	41.4733	-0.253666	0.190956	-1.3284	0.184047	0.946269
AC016065.2	2.50005	0.742444	0.726551	1.02187	0.306841	NA
AC016205.1	4.20251	0.24427	0.636107	0.384007	0.700973	NA
AC016355.1	11.7543	-0.304219	0.326625	-0.931403	0.351645	NA
AC016394.1	30.5578	0.0741957	0.276077	0.26875	0.788122	0.982133
AC016394.2	62.7268	0.405344	0.175953	2.30371	0.0212389	0.832838
AC016397.2	0.377066	1.0069	2.03555	0.494658	0.620841	NA
AC016542.1	1.53887	-0.0873272	0.832901	-0.104847	0.916497	NA
AC016546.1	1.48675	1.18283	1.07454	1.10078	0.270991	NA
AC016575.1	0.566613	-0.069793	1.85756	-0.0375724	0.970029	NA
AC016582.2	13.485	0.280326	0.313191	0.895065	0.370753	0.952192
AC016586.1	2.38638	1.21257	1.04239	1.16325	0.244727	NA
AC016588.1	0.869753	-0.64373	1.1933	-0.539456	0.589572	NA
AC016590.2	0.569509	0.112288	2.0821	0.0539303	0.956991	NA
AC016590.3	3.62055	-0.717517	0.596873	-1.20213	0.229315	NA
AC016596.1	3.64909	0.53154	0.867411	0.61279	0.540015	NA
AC016596.2	19.0652	0.142561	0.261727	0.544696	0.585963	0.962976
AC016597.1	0.433274	0.843401	1.58643	0.531635	0.594979	NA
AC016687.1	3.44726	-0.00359939	0.620664	-0.00579926	0.995373	NA
AC016691.1	8.52756	-0.249693	0.468624	-0.532821	0.594157	NA
AC016700.1	7.48177	0.800973	0.459676	1.74247	0.0814257	NA
AC016700.2	78.4243	0.0303256	0.1806	0.167916	0.866649	0.989479
AC016700.3	0.412882	1.20087	4.31897	0.278044	0.780978	NA
AC016705.2	3.04998	-0.574473	0.762978	-0.752934	0.451489	NA
AC016708.1	10.9013	-0.0623779	0.353298	-0.176559	0.859855	NA
AC016712.1	4.44522	0.173229	0.621326	0.278806	0.780394	NA
AC016716.1	75.8165	0.0494361	0.136665	0.361733	0.717552	0.975745
AC016717.2	2.17336	0.252178	0.864461	0.291717	0.770503	NA
AC016722.2	2.00713	-1.05532	0.890065	-1.18566	0.235755	NA
AC016722.3	0.474582	-0.961589	1.61183	-0.596582	0.550787	NA
AC016724.1	0.987735	0.401353	1.09166	0.367655	0.71313	NA
AC016727.1	20.9736	-0.334407	0.24574	-1.36082	0.173572	0.946269
AC016734.1	145.397	-0.0250653	0.133383	-0.18792	0.85094	0.986097
AC016737.1	2.06274	0.248963	0.665296	0.374215	0.708245	NA
AC016738.1	3.50805	-0.545433	0.612272	-0.890834	0.373018	NA
AC016738.2	0.648634	-0.114375	1.61663	-0.0707491	0.943597	NA
AC016739.1	869.168	0.0848747	0.0752622	1.12772	0.259438	0.946269
AC016745.1	4.48943	0.028652	0.568179	0.0504278	0.959781	NA
AC016745.2	0.479398	-1.23537	1.86975	-0.660713	0.508796	NA
AC016747.1	271.302	-0.122409	0.0918255	-1.33306	0.182511	0.946269
AC016757.1	48.179	-0.308774	0.187551	-1.64635	0.0996917	0.946269
AC016769.1	2.40926	-0.669999	0.75518	-0.887204	0.374969	NA
AC016769.2	4.1639	0.145453	0.49608	0.293204	0.769366	NA
AC016769.3	0.807357	-0.127384	1.47882	-0.0861389	0.931356	NA
AC016773.1	7.4326	0.182367	0.393272	0.463716	0.642851	NA
AC016831.1	31.2194	0.620274	0.429761	1.4433	0.148936	0.946269
AC016831.5	0.858935	-0.528904	1.7149	-0.308416	0.757766	NA
AC016831.7	10.6357	1.03188	0.46806	2.20458	0.0274835	NA
AC016876.1	112.728	-0.169366	0.116089	-1.45893	0.144584	0.946269
AC016876.2	0.690552	0.10152	1.71464	0.0592077	0.952787	NA
AC016876.3	10.6183	0.245908	0.35436	0.69395	0.487714	NA
AC016877.2	0.852529	0.728935	1.49777	0.486679	0.626486	NA
AC016877.3	4.61633	-0.47937	0.492919	-0.972513	0.330795	NA
AC016888.1	2.07362	0.00609788	0.815415	0.00747826	0.994033	NA
AC016894.1	0.518278	0.399328	1.89993	0.210181	0.833527	NA
AC016949.1	1.47775	-0.167781	1.17957	-0.14224	0.886891	NA
AC016957.2	0.365797	0.732852	2.04968	0.357545	0.720684	NA
AC016999.1	7.54395	0.13205	0.769327	0.171644	0.863718	NA
AC016999.2	0.677189	0.878869	2.01084	0.437065	0.662064	NA
AC017002.1	1.94365	-0.2084	0.826717	-0.252082	0.800978	NA
AC017002.6	0.371381	-1.77321	1.74679	-1.01512	0.310046	NA
AC017007.2	2.48576	1.76356	1.03273	1.70766	0.0876988	NA
AC017007.3	0.420938	1.0012	2.02749	0.49381	0.62144	NA
AC017013.1	3.60561	0.302329	0.618686	0.488664	0.62508	NA
AC017015.1	2.90054	0.52907	0.832589	0.635451	0.525134	NA
AC017033.1	3.20564	-0.758687	0.720312	-1.05328	0.292215	NA
AC017071.1	1.21024	-0.11692	1.02859	-0.11367	0.909499	NA
AC017074.1	1.43743	-0.621744	0.981913	-0.633196	0.526606	NA
AC017076.1	0.430917	-1.8269	1.62919	-1.12136	0.262135	NA
AC017079.1	0.317934	1.10991	2.02917	0.546979	0.584393	NA
AC017083.1	3.45858	2.19458	0.960292	2.28532	0.0222941	NA
AC017083.2	9.4477	-0.525639	0.419775	-1.25219	0.2105	NA
AC017083.3	7.63529	-0.882558	0.447184	-1.97359	0.0484284	NA
AC017100.1	63.0009	-0.36672	0.193831	-1.89196	0.0584964	0.925697
AC017101.1	0.536039	-2.48789	1.47282	-1.68921	0.0911795	NA
AC017104.1	4.20408	0.199055	0.58022	0.343068	0.731547	NA
AC017104.2	0.488766	0.039731	2.13563	0.0186039	0.985157	NA
AC017104.5	8.54197	-0.315803	0.383484	-0.823511	0.410217	NA
AC018362.1	1.87325	-0.387188	1.02217	-0.37879	0.704844	NA
AC018362.2	0.598186	1.98352	1.63692	1.21174	0.22561	NA
AC018371.2	277.094	-0.0747525	0.0899494	-0.83105	0.405945	0.952192
AC018413.1	41.6666	-0.336574	0.17946	-1.87549	0.060726	0.925697
AC018445.3	0.942113	1.64454	1.59683	1.02988	0.303067	NA
AC018463.1	6.22676	-0.795498	0.446107	-1.7832	0.0745535	NA
AC018475.1	61.0349	-0.0976478	0.195195	-0.500256	0.616895	0.964043
AC018521.2	1.0894	0.25795	1.28886	0.200138	0.841372	NA
AC018521.4	0.853889	-1.09674	1.28639	-0.85257	0.393898	NA
AC018521.5	44.2137	0.164001	0.190989	0.858692	0.39051	0.952192
AC018529.1	2.49888	0.35987	0.776315	0.463561	0.642962	NA
AC018529.2	1.18187	-1.65212	1.09305	-1.51147	0.130668	NA
AC018529.3	1.7954	-0.847759	0.827088	-1.02499	0.305367	NA
AC018553.1	40.9587	0.22467	0.199452	1.12643	0.259983	0.946269
AC018553.2	35.8416	0.190407	0.223762	0.850937	0.394805	0.952192
AC018557.1	4.24032	-0.538368	0.561072	-0.959533	0.33729	NA
AC018558.1	1.21005	0.117549	1.07013	0.109846	0.912532	NA
AC018628.1	1.71847	-0.0238363	0.971953	-0.0245241	0.980435	NA
AC018634.1	0.801019	-0.30834	1.44205	-0.21382	0.830687	NA
AC018635.1	0.50873	0.206255	2.40617	0.085719	0.93169	NA
AC018638.2	55.0613	0.300487	0.191975	1.56524	0.117526	0.946269
AC018638.4	60.5949	0.252754	0.196396	1.28696	0.198108	0.946269
AC018638.5	64.3196	0.518192	0.173593	2.9851	0.00283481	0.479051
AC018638.6	0.404667	-1.1454	2.27068	-0.50443	0.613959	NA
AC018638.8	11.8076	0.240343	0.380504	0.631644	0.527619	NA
AC018641.1	3.74604	-0.265411	0.703459	-0.377294	0.705955	NA
AC018644.1	0.900395	2.36947	1.55561	1.52317	0.127716	NA
AC018645.2	43.4312	-0.0267979	0.203379	-0.131763	0.895171	0.992143
AC018647.2	93.0163	-0.0758866	0.134208	-0.565441	0.571774	0.961064
AC018648.1	28.081	-0.334027	0.20767	-1.60845	0.107736	0.946269
AC018653.1	0.783235	1.80327	1.36383	1.32221	0.186099	NA
AC018653.3	1.03256	2.14342	1.52417	1.40629	0.159639	NA
AC018665.1	0.480724	-0.2608	1.4808	-0.176121	0.860199	NA
AC018690.1	6.97959	0.0272993	0.43569	0.0626575	0.950039	NA
AC018695.1	0.391769	-1.09064	1.74696	-0.624307	0.532426	NA
AC018695.6	0.336466	-1.07638	2.87588	-0.374279	0.708197	NA
AC018712.1	0.572098	1.46274	1.64598	0.888676	0.374177	NA
AC018735.1	1.6469	-0.169765	1.07913	-0.157316	0.874996	NA
AC018738.1	10.8346	0.150231	0.338625	0.44365	0.657295	NA
AC018754.1	4.23365	-0.130575	0.578982	-0.225524	0.821571	NA
AC018755.3	3.08681	1.2081	0.798677	1.51263	0.130374	NA
AC018761.2	5.11593	-0.342938	0.566451	-0.605415	0.544903	NA
AC018766.1	0.90231	0.985107	1.44409	0.682163	0.495136	NA
AC018797.2	6.36304	-0.306437	0.519063	-0.590365	0.554946	NA
AC018797.3	3.28308	0.223213	0.659699	0.338356	0.735095	NA
AC018804.1	0.855013	-1.32508	1.15814	-1.14414	0.252565	NA
AC018809.1	0.495248	-1.03192	1.89158	-0.545531	0.585388	NA
AC018809.2	2.59761	0.868209	0.877183	0.98977	0.322287	NA
AC018816.1	11.7981	0.00387915	0.359053	0.0108038	0.99138	NA
AC018845.3	2.17654	0.0207449	0.820413	0.025286	0.979827	NA
AC018868.1	43.4824	-0.00445289	0.271296	-0.0164134	0.986905	0.999532
AC018868.2	1.14396	0.459604	1.19328	0.38516	0.700119	NA
AC018892.3	1.84526	0.816434	1.02954	0.793011	0.427771	NA
AC018926.2	1.46978	0.928605	0.989312	0.938637	0.347917	NA
AC018926.3	0.354215	1.42277	2.19335	0.648675	0.516549	NA
AC019068.1	75.9416	0.0374407	0.146655	0.255298	0.798493	0.9822
AC019069.1	81.4802	-0.137921	0.154292	-0.893896	0.371378	0.952192
AC019077.1	1.66428	0.859187	0.90917	0.945024	0.344646	NA
AC019080.1	19.4547	0.224238	0.276948	0.809674	0.418128	0.952192
AC019080.5	14.5845	0.181828	0.306764	0.59273	0.553362	0.959293
AC019097.1	6.01036	-0.429881	0.563237	-0.763234	0.445324	NA
AC019117.1	0.395754	0.372176	1.87804	0.198172	0.84291	NA
AC019129.1	17.5003	-0.391793	0.310483	-1.26188	0.206991	0.946269
AC019129.2	1.07281	-0.667008	1.20405	-0.55397	0.579599	NA
AC019131.2	2.64148	0.678877	0.782758	0.867288	0.385784	NA
AC019163.1	5.69132	-0.068974	0.449978	-0.153283	0.878175	NA
AC019171.1	9.3582	0.137644	0.396879	0.346816	0.728729	NA
AC019178.1	85.6606	0.0536529	0.123363	0.434917	0.663622	0.968658
AC019178.2	0.384822	1.09352	2.58754	0.42261	0.67258	NA
AC019186.1	0.505851	-0.857087	1.72047	-0.498172	0.618363	NA
AC019193.2	0.951697	2.03192	1.49104	1.36275	0.172961	NA
AC019205.1	19.8667	-0.0326971	0.454967	-0.0718671	0.942708	0.994575
AC019209.3	0.438776	-0.445921	1.66826	-0.267298	0.78924	NA
AC019226.1	0.429273	-0.397758	1.70217	-0.233676	0.815236	NA
AC019227.1	6.60406	-0.223139	0.482463	-0.4625	0.643723	NA
AC019294.2	2.16506	-0.4141	0.734025	-0.564149	0.572652	NA
AC019349.1	0.439128	0.427332	1.97038	0.216878	0.828304	NA
AC020549.1	1.01835	0.240986	1.22448	0.196806	0.843979	NA
AC020558.1	5.74637	0.646277	0.502145	1.28703	0.198083	NA
AC020594.1	1.27324	0.329929	1.04703	0.31511	0.752678	NA
AC020612.1	0.358886	-1.04007	1.74669	-0.595452	0.551542	NA
AC020629.1	9.73992	-0.00584502	0.372344	-0.0156979	0.987475	NA
AC020633.1	2.02871	-0.440885	0.843203	-0.522869	0.601065	NA
AC020658.1	109.131	-0.0684397	0.190631	-0.359016	0.719583	0.976463
AC020658.2	1.28649	-1.79317	0.990541	-1.8103	0.0702499	NA
AC020658.4	1.09127	0.352561	1.10776	0.318265	0.750284	NA
AC020658.5	0.711321	0.317282	1.36815	0.231907	0.816611	NA
AC020661.1	5.80448	0.635246	0.649088	0.978674	0.327741	NA
AC020663.2	3.47036	0.44924	0.62955	0.713589	0.475481	NA
AC020663.3	2.09958	1.74928	1.17474	1.48907	0.136469	NA
AC020688.1	82.0566	-0.0534389	0.153665	-0.347763	0.728018	0.976599
AC020763.2	0.448464	-0.287966	1.72805	-0.166643	0.867651	NA
AC020763.4	12.0467	-0.599974	0.347598	-1.72606	0.084337	NA
AC020765.2	11.2325	-0.0638715	0.453221	-0.140928	0.887927	NA
AC020891.2	2.23882	0.171536	0.81211	0.211222	0.832714	NA
AC020893.1	2.64473	-0.411892	0.686196	-0.600254	0.548337	NA
AC020893.2	17.4108	-0.310413	0.336961	-0.921212	0.35694	0.952192
AC020898.1	86.5199	0.0759691	0.190294	0.39922	0.689731	0.971985
AC020899.1	0.467428	0.787352	2.02161	0.389467	0.69693	NA
AC020900.1	13.0684	-0.727542	0.50209	-1.44903	0.14733	NA
AC020904.2	41.8811	-0.105832	0.237209	-0.446154	0.655486	0.968514
AC020907.3	0.482666	0.372177	2.35232	0.158217	0.874286	NA
AC020907.5	0.638738	-0.928428	1.71733	-0.540623	0.588767	NA
AC020910.4	15.1698	-0.115005	0.312464	-0.368059	0.712829	0.975495
AC020910.5	13.389	-0.390592	0.305396	-1.27897	0.200908	0.946269
AC020911.2	0.857721	0.635544	4.80317	0.132318	0.894733	NA
AC020913.1	0.978356	0.540957	1.18341	0.457116	0.647588	NA
AC020913.2	0.370939	-2.40142	1.84881	-1.2989	0.19398	NA
AC020915.1	12.6644	-0.0172442	0.374524	-0.0460429	0.963276	NA
AC020915.2	0.486436	1.45036	1.90554	0.761128	0.44658	NA
AC020915.3	94.7728	-0.0716614	0.129179	-0.554745	0.579069	0.962
AC020916.1	59.2477	1.10061	0.330764	3.32746	0.000876413	0.251637
AC020917.1	9.38423	-0.481867	0.461287	-1.04461	0.296201	NA
AC020917.4	3.48472	1.39679	0.822837	1.69754	0.0895955	NA
AC020922.3	2.83213	-0.428414	0.631122	-0.678813	0.497256	NA
AC020922.4	1.39383	-0.111684	1.05804	-0.105558	0.915933	NA
AC020923.1	30.0464	0.35064	0.219133	1.60012	0.109571	0.946269
AC020928.1	54.1297	0.0400817	0.172609	0.232211	0.816374	0.9822
AC020928.2	40.0452	-0.287015	0.232354	-1.23525	0.216738	0.946269
AC020931.1	0.938321	0.625428	1.46012	0.42834	0.668403	NA
AC020934.1	1.25818	0.57153	1.48602	0.384603	0.700531	NA
AC020934.2	1.3035	-0.735035	0.921763	-0.797423	0.425205	NA
AC020937.1	0.826494	-1.02171	1.19725	-0.853387	0.393445	NA
AC020978.2	0.428245	-0.86835	1.86376	-0.465913	0.641278	NA
AC020978.4	1.55401	-0.729668	1.33287	-0.547442	0.584075	NA
AC020978.5	53.835	-0.0616842	0.228696	-0.269722	0.787374	0.982133
AC020978.7	0.890178	0.0766196	1.27816	0.0599451	0.952199	NA
AC020978.9	1.1182	-0.619473	1.1565	-0.535644	0.592205	NA
AC021001.1	3.60831	-0.29828	0.620466	-0.480736	0.630704	NA
AC021016.1	14.4252	-0.534656	0.365226	-1.46391	0.143219	0.946269
AC021016.2	3.14913	0.227373	0.688408	0.330288	0.741182	NA
AC021016.3	6.10389	0.163688	0.450639	0.363234	0.71643	NA
AC021028.1	5.9073	-0.469229	0.493814	-0.950213	0.342004	NA
AC021054.1	33.6631	0.115825	0.18618	0.622114	0.533867	0.959293
AC021066.1	0.976398	-0.262658	1.21299	-0.216537	0.828569	NA
AC021074.1	79.9296	0.125316	0.187992	0.666605	0.505025	0.958404
AC021078.1	131.162	0.381823	0.134733	2.83392	0.0045981	0.565732
AC021086.1	1.50815	-0.571854	0.910602	-0.627996	0.530007	NA
AC021087.2	29.2009	0.141869	0.219024	0.647734	0.517157	0.958407
AC021087.3	3.47756	-0.658633	0.658758	-0.99981	0.317402	NA
AC021092.1	2.71614	-0.802116	0.637621	-1.25798	0.208398	NA
AC021097.1	9.68545	-0.342449	0.399854	-0.856434	0.391758	NA
AC021097.2	0.912236	0.921562	1.35787	0.678682	0.497339	NA
AC021106.1	3.3445	0.0110262	0.820222	0.013443	0.989274	NA
AC021127.1	37.1743	0.304567	0.257803	1.18139	0.237446	0.946269
AC021146.7	0.402047	-0.311137	2.14993	-0.144719	0.884932	NA
AC021148.1	4.48272	-0.644868	0.513317	-1.25628	0.209015	NA
AC021171.1	1.02859	-0.311497	1.32799	-0.234563	0.814548	NA
AC021188.1	10.499	-0.00130465	0.423964	-0.00307726	0.997545	NA
AC021205.3	4.36192	0.251434	0.53255	0.472132	0.636832	NA
AC021218.1	35.6555	0.587165	0.248534	2.36251	0.0181514	0.810081
AC021224.1	1.35379	1.29985	1.10221	1.17931	0.238274	NA
AC021231.2	19.5966	0.302744	0.298045	1.01576	0.309742	0.946269
AC021242.3	6.40863	-0.0976782	0.485037	-0.201383	0.840399	NA
AC021321.1	3.09706	-0.601598	0.766604	-0.784758	0.432595	NA
AC021443.1	0.510015	1.47488	1.71005	0.862478	0.388425	NA
AC021491.2	2.82065	0.374695	0.750358	0.499355	0.617529	NA
AC021613.1	1.00888	1.49171	1.46888	1.01554	0.309847	NA
AC021660.2	0.580602	0.23498	1.52747	0.153836	0.877739	NA
AC021723.1	2.35539	-1.2024	0.745079	-1.61379	0.106572	NA
AC021733.2	0.32633	1.09352	2.1012	0.520426	0.602767	NA
AC021739.2	1.3532	-0.651015	0.948934	-0.686048	0.492683	NA
AC021739.3	0.347432	-1.76501	2.19714	-0.803319	0.42179	NA
AC021755.2	0.568634	-0.33065	1.87254	-0.176579	0.859839	NA
AC021851.1	7.06792	-0.64093	0.448494	-1.42907	0.152984	NA
AC021945.1	0.427592	-1.71311	1.93924	-0.883391	0.377025	NA
AC022001.2	0.876589	1.81702	1.68689	1.07714	0.281417	NA
AC022001.3	5.62348	0.00642477	0.648052	0.00991397	0.99209	NA
AC022007.1	15.6453	-0.076779	0.350366	-0.219139	0.826541	0.98348
AC022018.1	26.8672	-0.554148	0.271464	-2.04133	0.0412176	0.883118
AC022028.2	2.4057	-0.72121	0.781006	-0.923437	0.35578	NA
AC022031.2	0.553628	0.648492	1.74328	0.371995	0.709896	NA
AC022034.1	4.0256	0.572095	0.669953	0.853932	0.393142	NA
AC022034.2	0.480575	1.863	2.27447	0.819094	0.412733	NA
AC022034.3	1.59248	-0.77698	1.02049	-0.761377	0.446432	NA
AC022079.1	1.97406	-1.22996	0.639733	-1.92261	0.054529	NA
AC022079.2	1.15492	1.40637	1.48181	0.949087	0.342576	NA
AC022098.1	30.4637	0.201291	0.255288	0.788485	0.430413	0.952291
AC022098.3	1.06771	-0.42976	1.08584	-0.395785	0.692263	NA
AC022098.4	1.96771	0.972136	1.23993	0.784025	0.433025	NA
AC022107.1	73.79	-0.262185	0.173147	-1.51424	0.129965	0.946269
AC022144.1	27.9889	0.580893	0.332999	1.74443	0.0810847	0.946269
AC022150.4	14.1858	-0.0917042	0.339168	-0.27038	0.786868	0.981952
AC022154.1	0.499474	0.0540853	1.60367	0.033726	0.973096	NA
AC022165.1	0.720662	0.0815101	1.45877	0.0558758	0.955441	NA
AC022167.1	3.19847	0.207133	0.669373	0.309444	0.756984	NA
AC022167.2	23.1162	0.273357	0.281549	0.970905	0.331596	0.950511
AC022167.4	0.694372	0.598733	1.74914	0.342302	0.732124	NA
AC022182.1	1.38557	0.891944	1.25419	0.711169	0.476979	NA
AC022182.3	56.6377	-0.140528	0.197113	-0.712932	0.475888	0.954838
AC022201.2	5.04045	-0.666682	0.463455	-1.4385	0.150291	NA
AC022210.1	78.4209	-0.0547461	0.160841	-0.340374	0.733575	0.976599
AC022211.1	2.66933	0.689385	1.01931	0.676323	0.498835	NA
AC022211.2	61.6652	-0.254394	0.194704	-1.30657	0.191359	0.946269
AC022211.4	8.75288	0.0247378	0.448526	0.0551535	0.956016	NA
AC022217.1	4.43202	0.300642	1.05586	0.284738	0.775845	NA
AC022217.3	1.13873	0.162817	1.19725	0.135992	0.891827	NA
AC022239.1	0.83286	2.44717	1.43779	1.70203	0.088749	NA
AC022240.1	1.55092	-0.0372144	1.3639	-0.0272853	0.978232	NA
AC022306.1	4.60877	0.841168	0.868364	0.968681	0.332705	NA
AC022306.2	1.33342	-0.116511	1.16807	-0.0997471	0.920545	NA
AC022336.3	1.4656	0.691151	1.09542	0.630947	0.528075	NA
AC022364.1	27.9396	0.255223	0.283617	0.899887	0.36818	0.952192
AC022382.1	1.25107	-0.618228	1.1356	-0.544405	0.586163	NA
AC022395.1	0.379913	-1.38969	1.64991	-0.842281	0.399631	NA
AC022400.5	7.04467	1.57598	0.518076	3.04199	0.00235019	NA
AC022400.6	1.23703	-0.0726171	1.02411	-0.0709076	0.943471	NA
AC022400.7	23.9792	0.103464	0.312811	0.330756	0.740829	0.976946
AC022400.8	35.194	-0.447381	0.201547	-2.21973	0.026437	0.854226
AC022413.1	45.7214	0.163167	0.178699	0.913082	0.361199	0.952192
AC022415.1	1.859	0.545432	0.888648	0.613778	0.539362	NA
AC022417.1	3.40063	0.0778382	0.659369	0.118049	0.906028	NA
AC022445.1	0.606376	0.136213	1.60138	0.0850602	0.932214	NA
AC022447.4	0.324768	-2.17826	2.38594	-0.912957	0.361265	NA
AC022483.1	6.94173	-0.864636	0.480894	-1.79797	0.072181	NA
AC022494.1	0.569508	-1.87376	1.52573	-1.2281	0.219409	NA
AC022509.1	0.932829	-0.24255	1.11615	-0.21731	0.827967	NA
AC022509.2	0.642365	0.565002	1.5808	0.357415	0.720781	NA
AC022509.3	44.8135	-0.0238383	0.219766	-0.108471	0.913622	0.993297
AC022509.4	0.41682	-0.937201	1.97981	-0.47338	0.635942	NA
AC022532.1	1.46592	0.123987	1.06938	0.115942	0.907698	NA
AC022558.3	10.3739	-0.517294	0.352194	-1.46878	0.141893	NA
AC022613.1	56.1252	-0.117218	0.16526	-0.70929	0.478144	0.955499
AC022613.2	13.1714	-0.167595	0.36722	-0.456387	0.648111	NA
AC022616.4	0.989878	-1.13813	1.27153	-0.895084	0.370742	NA
AC022748.1	1.16508	-0.700452	1.11307	-0.629299	0.529154	NA
AC022762.2	2.01628	1.04978	0.928023	1.13121	0.257969	NA
AC022784.3	1.66049	-0.591462	0.927675	-0.637574	0.523751	NA
AC022784.8	1.08482	1.94196	1.37774	1.40953	0.158678	NA
AC022795.1	16.8474	-0.500588	0.281661	-1.77727	0.0755239	0.944876
AC022809.1	0.909802	-1.13342	1.48567	-0.7629	0.445523	NA
AC022868.1	16.9154	-0.193193	0.260578	-0.741401	0.45845	0.953463
AC022893.1	0.422203	0.0115062	2.08774	0.00551131	0.995603	NA
AC022916.1	7.1826	-0.763268	0.472896	-1.61403	0.106521	NA
AC022966.1	18.3899	-0.532039	0.362238	-1.46876	0.141899	0.946269
AC022968.1	61.7279	0.0623969	0.181466	0.343849	0.73096	0.976599
AC023024.1	4.6159	0.235005	0.571799	0.410993	0.681078	NA
AC023024.2	3.99149	0.321189	0.60305	0.532608	0.594305	NA
AC023043.1	2.29203	-0.509394	1.01946	-0.499671	0.617307	NA
AC023043.2	0.398465	0.556866	2.02626	0.274824	0.783452	NA
AC023043.4	1.62752	-0.530524	0.927168	-0.572198	0.567188	NA
AC023055.1	3.28634	-0.788675	0.599429	-1.31571	0.188271	NA
AC023137.1	0.883444	1.23554	4.83109	0.255748	0.798146	NA
AC023157.1	5.75719	-0.180239	0.512705	-0.351546	0.725179	NA
AC023157.3	9.809	-0.176341	0.360917	-0.48859	0.625132	NA
AC023161.2	15.1599	-0.750626	0.286003	-2.62454	0.00867662	0.662852
AC023232.1	5.09827	1.06158	0.728655	1.45691	0.145141	NA
AC023310.2	1.34789	0.942084	1.25169	0.752648	0.451661	NA
AC023355.1	8.98214	0.147968	0.408552	0.362176	0.71722	NA
AC023389.2	0.378132	0.328383	1.85897	0.176648	0.859785	NA
AC023424.1	13.0221	0.469601	0.429831	1.09252	0.274603	NA
AC023449.2	3.04337	-0.500557	0.750317	-0.667127	0.504691	NA
AC023481.1	0.610513	-1.25684	1.49765	-0.839207	0.401353	NA
AC023509.2	0.372183	1.08822	1.71612	0.634113	0.526007	NA
AC023509.3	0.78095	-1.49905	1.37053	-1.09378	0.274052	NA
AC023509.4	14.4113	-0.320697	0.323134	-0.992459	0.320974	0.946916
AC023512.1	10.2584	0.174175	0.381083	0.457052	0.647634	NA
AC023538.1	1.59515	0.147395	0.980751	0.150288	0.880538	NA
AC023632.2	3.31076	-0.259487	0.705431	-0.367842	0.712991	NA
AC023632.6	55.9888	0.156786	0.201257	0.779035	0.435959	0.952291
AC023794.1	13.8009	0.0921657	0.325557	0.283101	0.777099	0.979714
AC023794.3	1.34894	-0.791706	1.21779	-0.650115	0.515618	NA
AC023794.5	9.61662	0.265824	0.419292	0.633985	0.526091	NA
AC023794.6	0.381296	0.372183	2.39312	0.155522	0.876409	NA
AC023796.2	1.39478	-0.45162	1.08484	-0.416301	0.67719	NA
AC023813.2	1.09289	-0.444542	1.2615	-0.352391	0.724545	NA
AC023813.3	0.70454	0.609557	1.64719	0.370059	0.711339	NA
AC023818.1	0.439774	1.36371	1.96251	0.694879	0.487131	NA
AC023830.3	0.759261	0.0443757	1.38715	0.0319905	0.97448	NA
AC023886.2	8.57381	-0.646878	0.393619	-1.64341	0.100298	NA
AC023906.1	38.6853	0.00047906	0.237926	0.00201348	0.998393	0.999851
AC023906.3	0.720591	0.102479	1.27262	0.0805256	0.935819	NA
AC023908.3	1.2625	3.23404	1.2711	2.54427	0.0109506	NA
AC023934.1	0.753888	1.08696	1.28079	0.848665	0.396068	NA
AC023968.2	8.4603	0.118514	0.408138	0.290377	0.771528	NA
AC024060.1	13.62	0.169097	0.313446	0.539476	0.589558	0.962976
AC024075.1	4.14286	0.696995	0.647438	1.07654	0.281685	NA
AC024075.2	12.333	0.343458	0.380174	0.903422	0.366302	NA
AC024243.1	2.1828	-0.150062	0.798803	-0.187858	0.850988	NA
AC024257.3	1.1797	1.33409	1.32336	1.0081	0.313404	NA
AC024293.1	101.901	-0.061174	0.148262	-0.412609	0.679893	0.970436
AC024361.2	0.945028	0.894594	1.33808	0.668566	0.503772	NA
AC024405.1	74.1954	0.00439562	0.141237	0.0311224	0.975172	0.996353
AC024451.2	2.97779	-0.632595	0.811905	-0.779149	0.435892	NA
AC024451.3	2.4342	1.00346	0.89259	1.12421	0.260925	NA
AC024451.4	0.702617	1.83009	1.43769	1.27293	0.203041	NA
AC024560.1	37.6908	-0.0205633	0.24981	-0.0823157	0.934396	0.993749
AC024560.2	0.724396	2.0996	1.49955	1.40015	0.161468	NA
AC024560.3	0.487466	0.0195231	1.87455	0.0104148	0.99169	NA
AC024568.1	0.742174	0.748037	1.53601	0.487001	0.626258	NA
AC024575.1	2.25672	-0.146467	0.77974	-0.18784	0.851002	NA
AC024580.1	0.926802	1.30545	1.54649	0.844135	0.398594	NA
AC024581.2	0.649776	0.0115045	1.5298	0.00752024	0.994	NA
AC024587.1	2.08878	-0.16964	0.769717	-0.220392	0.825566	NA
AC024619.3	1.90467	0.629716	0.911704	0.690702	0.489753	NA
AC024619.4	21.3859	0.0807977	0.266325	0.30338	0.7616	0.97952
AC024884.1	0.69504	0.355729	1.45668	0.244205	0.807072	NA
AC024884.2	0.387559	0.0115051	1.64954	0.00697471	0.994435	NA
AC024896.1	1.7782	1.81408	1.10009	1.64903	0.0991406	NA
AC024909.2	2.19902	0.731527	0.763289	0.958388	0.337867	NA
AC024933.1	0.520602	0.323207	1.66381	0.194257	0.845975	NA
AC024937.2	0.364944	-1.0041	2.21734	-0.452837	0.650666	NA
AC024940.1	3.08645	1.35806	0.859889	1.57935	0.114256	NA
AC024940.2	3.64166	0.0729478	0.748169	0.0975018	0.922328	NA
AC024940.3	117.922	0.0524664	0.206434	0.254156	0.799375	0.9822
AC024940.6	0.346426	-0.319847	2.21189	-0.144603	0.885024	NA
AC024995.1	10.981	0.066153	0.522753	0.126547	0.899299	NA
AC025031.1	1.74873	0.907541	0.93791	0.96762	0.333234	NA
AC025031.2	0.91022	-1.17595	1.53816	-0.764516	0.44456	NA
AC025031.4	8.67413	-0.376979	0.479034	-0.786955	0.431308	NA
AC025040.2	4.84985	-0.266239	0.549996	-0.484074	0.628333	NA
AC025043.1	1.78915	-1.40336	0.78688	-1.78344	0.074514	NA
AC025048.2	31.3776	0.0632124	0.218245	0.289639	0.772092	0.979714
AC025048.3	0.541634	-0.727371	1.5369	-0.473271	0.63602	NA
AC025048.4	2.92096	-0.223793	0.626414	-0.357261	0.720896	NA
AC025048.6	2.23625	-0.535731	0.662165	-0.80906	0.41848	NA
AC025062.1	0.474189	-0.349166	1.68081	-0.207737	0.835434	NA
AC025154.2	0.538565	0.958567	1.86537	0.513874	0.60734	NA
AC025161.1	31.9317	0.148485	0.223076	0.665625	0.505651	0.958404
AC025162.1	2.34969	-1.16427	0.71972	-1.61767	0.105735	NA
AC025162.2	0.548743	-1.2086	1.72798	-0.699428	0.484284	NA
AC025164.1	3.67502	2.49303	0.965502	2.58211	0.00981978	NA
AC025165.1	1.17177	-1.00446	1.00447	-0.999986	0.317317	NA
AC025165.2	2.88611	-0.852661	0.658916	-1.29404	0.195653	NA
AC025165.4	0.933944	-1.66224	1.32552	-1.25403	0.209831	NA
AC025165.5	2.16893	0.396427	0.744717	0.532319	0.594505	NA
AC025166.1	1.53586	-0.0595908	0.93917	-0.0634505	0.949408	NA
AC025171.1	156.416	-0.296225	0.105403	-2.81041	0.00494784	0.57185
AC025171.2	32.6548	0.288428	0.266401	1.08268	0.278949	0.946269
AC025171.3	0.551165	0.5012	1.375	0.364509	0.715478	NA
AC025171.4	1.79048	0.168768	1.05316	0.160249	0.872685	NA
AC025171.5	6.02273	-0.305084	0.555697	-0.549011	0.582998	NA
AC025175.1	0.421095	-1.21687	1.57464	-0.772794	0.439645	NA
AC025176.1	0.796943	-1.12787	1.29295	-0.87232	0.383034	NA
AC025178.1	0.806641	1.58372	1.60499	0.986745	0.323767	NA
AC025180.1	0.712595	-0.699727	1.63604	-0.427695	0.668874	NA
AC025181.1	1.61827	0.0235425	0.866709	0.0271631	0.97833	NA
AC025181.2	49.573	-0.102527	0.172629	-0.593914	0.55257	0.959293
AC025183.1	2.8104	-0.394721	0.799018	-0.494008	0.6213	NA
AC025183.2	0.324601	0.0945916	2.46936	0.0383061	0.969444	NA
AC025188.1	10.0511	-0.0838333	0.385684	-0.217363	0.827926	NA
AC025198.1	4.29938	0.0685529	0.591665	0.115864	0.90776	NA
AC025257.1	0.415509	0.43851	1.74903	0.250717	0.802033	NA
AC025259.1	3.06503	-0.362964	0.649367	-0.55895	0.576196	NA
AC025259.2	0.943949	-0.254368	1.39894	-0.18183	0.855717	NA
AC025262.3	1.12923	0.525358	1.14147	0.460247	0.645339	NA
AC025265.1	7.16766	0.655375	0.50106	1.30798	0.190881	NA
AC025271.1	6.09115	0.362075	0.538666	0.672169	0.501476	NA
AC025279.1	0.974362	0.144967	1.09179	0.13278	0.894368	NA
AC025283.2	10.2998	-0.347237	0.356096	-0.97512	0.329501	NA
AC025283.3	3.83355	-0.492869	0.58022	-0.849452	0.39563	NA
AC025287.2	1.97052	-0.559796	0.756184	-0.740291	0.459123	NA
AC025287.3	0.49342	-0.340838	1.55794	-0.218775	0.826825	NA
AC025423.3	1.5082	0.219578	1.09578	0.200385	0.84118	NA
AC025423.4	1.62505	1.0975	0.983772	1.11561	0.264591	NA
AC025442.1	1.05417	1.19617	1.10438	1.08311	0.278759	NA
AC025449.1	7.95584	0.265887	0.428061	0.621144	0.534505	NA
AC025458.1	7.35743	0.456969	0.592778	0.770895	0.440769	NA
AC025459.1	6.16883	-0.769891	0.558206	-1.37922	0.167826	NA
AC025470.1	0.739842	-0.0519136	1.64839	-0.0314935	0.974876	NA
AC025470.2	2.73305	-0.643102	0.732338	-0.87815	0.379862	NA
AC025518.1	4.47452	0.672659	0.599721	1.12162	0.262025	NA
AC025538.1	3.98654	-0.0811143	0.611522	-0.132643	0.894475	NA
AC025574.1	0.714413	-0.560124	1.46118	-0.383337	0.70147	NA
AC025580.2	0.791751	2.6262	1.84174	1.42594	0.153887	NA
AC025588.1	2.49867	-0.471622	0.643476	-0.732929	0.463602	NA
AC025594.1	0.418537	0.0736995	1.98017	0.0372188	0.970311	NA
AC025594.2	14.9522	-0.125622	0.333687	-0.376468	0.706569	0.974682
AC025594.3	3.5418	-0.103649	0.60461	-0.171431	0.863885	NA
AC025627.1	2.66335	-0.592145	0.770629	-0.768392	0.442254	NA
AC025678.3	7.4177	-0.345399	0.448653	-0.769858	0.441384	NA
AC025682.1	18.4511	-0.429085	0.251953	-1.70304	0.088561	0.946269
AC025750.2	4.04531	-0.197117	0.593238	-0.332273	0.739683	NA
AC025766.1	1.37376	-0.788623	0.935281	-0.843193	0.399121	NA
AC025809.1	0.436844	-0.562322	2.41591	-0.232757	0.81595	NA
AC025857.2	2.06983	-0.559567	0.812949	-0.688317	0.491253	NA
AC025884.1	22.019	0.0575826	0.285886	0.201418	0.840372	0.984573
AC025884.2	14.4889	0.133961	0.330424	0.405422	0.685167	0.970697
AC025918.1	0.698712	-0.657008	1.40462	-0.467748	0.639965	NA
AC025946.1	0.427118	-0.16445	1.64977	-0.0996805	0.920598	NA
AC026111.1	7.8173	0.101784	0.416673	0.244278	0.807015	NA
AC026124.2	6.86159	0.511806	0.469196	1.09082	0.275354	NA
AC026150.1	1.61919	-0.254144	0.967369	-0.262717	0.792769	NA
AC026191.1	1.17752	0.333123	1.01023	0.329749	0.741589	NA
AC026202.2	1.66301	-1.10423	1.01406	-1.08892	0.27619	NA
AC026202.3	1.26577	-0.153877	1.17925	-0.130487	0.896181	NA
AC026250.1	62.7168	-0.189645	0.163463	-1.16017	0.245979	0.946269
AC026254.2	1.36391	0.168236	1.03825	0.162039	0.871275	NA
AC026271.1	161.304	-0.163446	0.0992312	-1.64713	0.0995321	0.946269
AC026271.3	83.0885	0.222958	0.169489	1.31547	0.188351	0.946269
AC026304.1	10.1126	0.489608	0.389657	1.25651	0.208931	NA
AC026310.2	0.377852	-0.725868	1.87194	-0.387761	0.698193	NA
AC026316.1	5.78261	-0.629887	0.472605	-1.3328	0.182598	NA
AC026316.2	2.06558	0.622996	1.05942	0.588056	0.556495	NA
AC026356.1	39.8291	-0.0787198	0.243764	-0.322934	0.746745	0.978399
AC026356.2	4.99645	-0.0759304	0.52534	-0.144536	0.885078	NA
AC026358.1	0.364534	-0.606945	2.06085	-0.294512	0.768367	NA
AC026362.1	0.6961	-1.1613	1.62401	-0.715082	0.474558	NA
AC026367.1	3.09766	0.492957	0.762517	0.646487	0.517964	NA
AC026368.1	0.860982	1.09824	1.37011	0.801572	0.422801	NA
AC026369.2	2.27892	-0.116451	0.854699	-0.136248	0.891625	NA
AC026401.3	314.524	0.137461	0.113418	1.21199	0.225516	0.946269
AC026403.1	216.537	0.118546	0.11564	1.02513	0.305303	0.946269
AC026410.1	2.46571	-0.0324457	0.715266	-0.0453617	0.963819	NA
AC026410.2	3.76858	0.357922	0.801511	0.446559	0.655194	NA
AC026410.3	11.9133	0.44537	0.352256	1.26434	0.206109	NA
AC026412.1	356.67	-0.173059	0.0647365	-2.67328	0.0075113	0.623132
AC026412.2	0.843032	-0.431423	1.2023	-0.358831	0.719722	NA
AC026412.3	0.432391	-0.375033	1.73419	-0.216258	0.828787	NA
AC026422.1	1.58635	0.210426	3.41069	0.0616959	NA	NA
AC026436.1	12.9635	0.287807	0.305735	0.941361	0.34652	NA
AC026461.3	0.703207	0.380415	1.62577	0.233991	0.814992	NA
AC026462.1	28.5714	-0.0801943	0.268598	-0.298567	0.765271	0.979714
AC026471.1	152.051	0.201314	0.125072	1.60958	0.107489	0.946269
AC026471.2	4.23359	-0.0947857	0.664536	-0.142634	0.886579	NA
AC026471.3	13.3934	-0.490606	0.301342	-1.62807	0.103511	0.946269
AC026471.4	6.79139	0.60524	0.484102	1.25023	0.211215	NA
AC026471.6	16.0616	-0.360221	0.312851	-1.15141	0.249563	0.946269
AC026688.1	1.02837	0.248752	1.26844	0.196109	0.844525	NA
AC026691.1	10.212	0.329617	0.406015	0.811835	0.416886	NA
AC026700.1	5.28218	0.73147	0.620373	1.17908	0.238366	NA
AC026704.1	1.59901	0.0130971	0.925873	0.0141457	0.988714	NA
AC026740.1	27.6144	0.256952	0.214772	1.19639	0.231543	0.946269
AC026771.1	1.95399	-0.86385	0.971182	-0.889483	0.373744	NA
AC026774.2	3.84584	0.39627	0.672542	0.589212	0.555719	NA
AC026780.2	10.869	-0.444196	0.384722	-1.15459	0.248259	NA
AC026785.2	18.37	-0.681565	0.297019	-2.29469	0.0217511	0.832838
AC026801.2	6.46241	-0.0938777	0.391999	-0.239484	0.81073	NA
AC026803.2	3.74551	-0.656169	0.72999	-0.898875	0.368719	NA
AC026877.1	177.572	-0.145454	0.121598	-1.19619	0.231624	0.946269
AC026951.1	10.3556	0.0781725	0.382512	0.204366	0.838067	NA
AC026954.1	0.856909	-0.895445	1.57968	-0.566852	0.570815	NA
AC026956.1	0.623662	0.37032	1.29488	0.285988	0.774887	NA
AC026979.2	3.90577	-0.421465	0.706643	-0.596433	0.550886	NA
AC027020.2	1.69905	-0.321258	0.836253	-0.384164	0.700857	NA
AC027031.2	10.7493	0.244226	0.407281	0.599648	0.548741	NA
AC027097.1	59.7137	-0.0424402	0.199348	-0.212895	0.831409	0.983692
AC027097.2	26.6843	0.329582	0.249936	1.31867	0.18728	0.946269
AC027228.2	3.34055	-0.313775	0.660173	-0.475292	0.634579	NA
AC027237.3	28.8598	0.183214	0.277336	0.660619	0.508857	0.958404
AC027243.1	0.396204	-1.59437	1.72896	-0.922152	0.356449	NA
AC027243.2	0.407374	-0.915354	1.74065	-0.525868	0.59898	NA
AC027271.1	1.41802	-0.618134	0.944104	-0.654731	0.512641	NA
AC027277.1	1.12468	-0.417997	1.04311	-0.400723	0.688624	NA
AC027287.1	3.08692	0.287324	0.661197	0.434552	0.663888	NA
AC027290.1	1.83443	0.569603	0.791721	0.719449	0.471865	NA
AC027290.2	8.14609	0.571213	0.565988	1.00923	0.312864	NA
AC027307.2	206.92	0.135236	0.0988585	1.36797	0.17132	0.946269
AC027307.3	6.83887	0.115034	0.571098	0.201426	0.840366	NA
AC027309.2	47.3367	-0.00568602	0.196103	-0.0289951	0.976869	0.996353
AC027313.1	6.76992	-0.348781	0.451255	-0.772914	0.439573	NA
AC027319.1	2.53589	-0.532351	0.890679	-0.597691	0.550046	NA
AC027338.1	0.339091	-0.68996	2.2153	-0.311453	0.755456	NA
AC027373.1	3.59468	1.0331	0.738846	1.39826	0.162035	NA
AC027559.1	46.4673	0.0146019	0.173059	0.0843748	0.932758	0.993749
AC027575.2	7.29103	-0.172859	0.45444	-0.380378	0.703665	NA
AC027601.1	1.09263	0.533504	1.23805	0.430923	0.666525	NA
AC027601.2	0.616852	-2.38859	1.78899	-1.33516	0.181823	NA
AC027601.3	6.25358	0.310954	0.517108	0.601334	0.547618	NA
AC027601.4	8.95905	-0.0865587	0.432183	-0.200283	0.84126	NA
AC027601.5	0.361405	0.680319	2.28618	0.297579	0.766024	NA
AC027607.1	0.63715	1.93829	1.55904	1.24325	0.213774	NA
AC027612.1	1.87927	0.869778	0.895408	0.971376	0.331361	NA
AC027612.3	21.7397	-6.4419e-05	0.226812	-0.00028402	0.999773	0.999851
AC027644.1	3.89263	0.45754	0.725365	0.630772	0.52819	NA
AC027644.3	98.5231	0.00755488	0.154333	0.0489518	0.960958	0.995715
AC027682.1	3.26089	-0.620637	0.695587	-0.892249	0.37226	NA
AC027682.2	1.36669	-0.267696	0.946653	-0.282782	0.777344	NA
AC027682.3	0.948097	-0.889284	1.29449	-0.686975	0.492098	NA
AC027682.4	2.18057	-0.670977	0.992395	-0.676119	0.498965	NA
AC027682.5	2.24003	0.496266	0.792219	0.626425	0.531036	NA
AC027682.6	53.5318	-0.16449	0.14445	-1.13873	0.254815	0.946269
AC027796.2	0.815951	0.808911	1.50644	0.536969	0.591289	NA
AC027796.4	10.0892	0.817626	0.406869	2.00955	0.0444784	NA
AC027801.1	1.76326	-0.984418	0.940053	-1.04719	0.29501	NA
AC027801.3	5.83107	-0.178991	0.495376	-0.361324	0.717857	NA
AC032011.1	0.796796	1.22998	1.49134	0.824749	0.409514	NA
AC034102.1	10.9062	0.240706	0.344237	0.699246	0.484398	NA
AC034102.4	9.97406	-0.693394	0.395525	-1.7531	0.0795853	NA
AC034102.5	4.32922	-0.0893716	0.573171	-0.155925	0.876092	NA
AC034102.6	2.896	0.0234402	0.701286	0.0334247	0.973336	NA
AC034111.1	0.547595	1.96329	1.71351	1.14577	0.25189	NA
AC034207.1	2.95138	-0.574319	0.897082	-0.640208	0.522038	NA
AC034213.1	3.91784	1.88556	0.890117	2.11833	0.0341474	NA
AC034223.2	8.40919	-0.306744	0.426547	-0.719133	0.472059	NA
AC034229.4	0.676183	-0.625089	1.34166	-0.465907	0.641282	NA
AC034231.1	16.5121	0.532923	0.270259	1.97189	0.0486216	0.899755
AC034232.1	2.20782	-0.310381	0.853149	-0.363806	0.716003	NA
AC034236.1	165.036	0.0323594	0.132571	0.244091	0.807161	0.9822
AC034236.2	42.1833	0.188404	0.204216	0.922575	0.356229	0.952192
AC034243.1	6.12664	-0.370027	0.549571	-0.673301	0.500756	NA
AC035140.1	0.7503	-0.684249	1.33406	-0.512908	0.608016	NA
AC036103.1	0.672327	1.60622	1.63603	0.981776	0.32621	NA
AC036108.1	0.450719	-2.64521	1.37432	-1.92475	0.0542607	NA
AC036108.2	8.24034	-0.9218	0.475548	-1.9384	0.052575	NA
AC036108.3	3.79596	0.0738783	0.580648	0.127234	0.898755	NA
AC036108.4	4.41945	0.131027	0.64009	0.204702	0.837805	NA
AC036164.1	0.51915	0.732852	1.69829	0.431522	0.666089	NA
AC036176.1	8.62158	-0.240265	0.441505	-0.544196	0.586307	NA
AC036176.2	0.345936	0	4.8388	0	1	NA
AC036214.1	0.321949	-0.21123	2.29922	-0.0918703	0.926801	NA
AC036214.2	11.8696	-0.0969678	0.319482	-0.303515	0.761497	NA
AC037198.2	0.454021	-1.38556	1.66344	-0.832952	0.404872	NA
AC037459.3	84.9596	-0.0307279	0.187287	-0.164069	0.869677	0.989777
AC037459.4	4.12136	-0.348837	0.557537	-0.625674	0.531529	NA
AC037479.1	0.918548	0.909804	1.33355	0.68224	0.495087	NA
AC037487.3	1.24911	-1.29179	1.15388	-1.11952	0.26292	NA
AC039056.2	3.72844	-0.00887281	0.745135	-0.0119077	0.990499	NA
AC040160.1	1.94105	0.1214	0.968168	0.125392	0.900214	NA
AC040160.2	0.37713	0.732851	1.86523	0.392902	0.694392	NA
AC040162.1	6.70353	0.75245	0.491027	1.5324	0.125424	NA
AC040162.3	3.43725	-0.183191	0.597346	-0.306675	0.759091	NA
AC040169.1	61.5966	0.0685355	0.16688	0.410687	0.681302	0.970436
AC040169.2	0.418404	-0.0779813	1.82185	-0.0428033	0.965858	NA
AC040169.3	5.20921	-0.315106	0.456852	-0.689733	0.490362	NA
AC040904.1	11.5183	0.0835185	0.442247	0.18885	0.85021	NA
AC040918.1	0.39505	0.732218	2.18614	0.334936	0.737673	NA
AC040934.1	1.81744	-0.234811	0.851341	-0.275814	0.782691	NA
AC040970.1	30.3525	-0.178042	0.200428	-0.888306	0.374376	0.952192
AC040977.1	25.7586	0.300448	0.235543	1.27555	0.202114	0.946269
AC044787.1	73.1661	-0.279732	0.165669	-1.68849	0.0913163	0.946269
AC044797.1	5.84688	0.860876	0.52023	1.6548	0.0979653	NA
AC044802.1	6.64264	0.52621	0.513596	1.02456	0.30557	NA
AC044802.2	4.17113	-0.459464	0.663821	-0.692151	0.488843	NA
AC044810.2	0.959887	0.0451545	1.34461	0.0335819	0.973211	NA
AC044839.1	0.335418	0.800591	2.9161	0.274542	0.783668	NA
AC044849.1	5.35212	0.242689	0.641127	0.378534	0.705034	NA
AC044860.1	38.9557	0.0496171	0.206148	0.240686	0.809798	0.9822
AC044860.3	0.363007	0.179783	2.11475	0.0850138	0.93225	NA
AC044913.1	1.64778	0.227796	0.99446	0.229065	0.818818	NA
AC046130.2	0.945058	-1.85924	1.22523	-1.51747	0.129149	NA
AC046134.1	1.03064	0.0160202	1.18979	0.0134648	0.989257	NA
AC046143.1	15.381	0.0426547	0.312279	0.136592	0.891354	0.991858
AC046143.2	2.70308	1.16386	0.886496	1.31288	0.189223	NA
AC046168.2	2.31075	-0.601387	1.04371	-0.576201	0.564479	NA
AC046176.1	38.0224	0.0843341	0.234146	0.360178	0.718714	0.976256
AC046185.2	0.696332	-1.46418	1.49177	-0.981506	0.326343	NA
AC046185.3	20.888	0.122191	0.298334	0.409577	0.682116	0.970436
AC048334.1	1.38036	2.24566	1.27439	1.76215	0.078044	NA
AC048341.1	15.3253	0.351216	0.31061	1.13073	0.258169	0.946269
AC048341.2	18.8741	0.0790061	0.421115	0.187612	0.851181	0.986097
AC048344.1	2.19191	0.548462	0.93553	0.586258	0.557702	NA
AC048344.4	17.4674	0.342188	0.29996	1.14078	0.253963	0.946269
AC048351.1	1.52406	-0.995059	0.934608	-1.06468	0.287021	NA
AC048380.2	0.448383	0.957446	2.17625	0.439952	0.659972	NA
AC048382.5	7.3454	-0.17735	0.392336	-0.452036	0.651243	NA
AC048382.6	2.60835	-0.632538	0.753257	-0.839737	0.401056	NA
AC051619.5	0.657401	1.66625	1.4622	1.13955	0.254472	NA
AC051619.6	2.09282	0.685593	0.830686	0.825334	0.409182	NA
AC051619.7	0.482413	-0.35394	1.64009	-0.215806	0.829139	NA
AC051619.8	0.648218	1.09635	1.78063	0.615708	0.538087	NA
AC053481.2	1.4019	0.508289	1.02124	0.497718	0.618683	NA
AC053481.3	5.78944	-0.331185	0.452089	-0.732566	0.463823	NA
AC053503.2	3.5796	0.476171	0.775845	0.613745	0.539384	NA
AC053503.5	4.7419	-0.118323	0.55625	-0.212715	0.83155	NA
AC053527.1	3.72064	0.851465	0.793308	1.07331	0.283132	NA
AC055713.1	6.25413	-0.158681	0.498778	-0.31814	0.750379	NA
AC055716.2	5.96267	-0.312115	0.496742	-0.628325	0.529791	NA
AC055720.2	1.03918	3.2511	1.25874	2.58281	0.00979993	NA
AC055764.1	0.672892	-0.757105	1.42036	-0.533039	0.594007	NA
AC055764.2	0.438728	-0.192572	1.61864	-0.118971	0.905298	NA
AC055811.1	0.39814	0.184173	2.46341	0.0747634	0.940403	NA
AC055811.2	1.25896	0.500443	0.87845	0.569689	0.568889	NA
AC055811.3	1.05866	1.24584	3.81877	0.32624	0.744243	NA
AC055811.4	15.3599	0.662937	0.385499	1.71969	0.0854895	0.946269
AC055813.1	4.06534	-0.0817156	0.82196	-0.0994156	0.920808	NA
AC055822.1	0.341733	-0.915391	2.23363	-0.409822	0.681936	NA
AC055839.1	2.48946	-0.421631	0.867945	-0.485781	0.627123	NA
AC055855.1	0.719879	1.6452	1.66515	0.988016	0.323145	NA
AC055855.2	3.5788	0.153129	0.582322	0.262963	0.792579	NA
AC055876.1	0.590624	-1.30995	1.54478	-0.847983	0.396447	NA
AC058791.1	1.92726	0.545526	0.973262	0.560513	0.575129	NA
AC060766.1	9.98728	-0.0296281	0.464576	-0.0637744	0.94915	NA
AC060766.4	1.05192	0.469697	1.22198	0.384373	0.700702	NA
AC060766.5	1.99933	0.695557	0.89265	0.779205	0.435859	NA
AC060766.7	3.54281	-0.109013	0.649343	-0.167882	0.866676	NA
AC060780.1	2.39823	-0.277513	0.803738	-0.345278	0.729885	NA
AC060780.2	0.673296	1.60641	1.63727	0.981153	0.326517	NA
AC060780.3	1.19008	0.227417	1.07546	0.21146	0.832528	NA
AC061965.1	16.3698	-0.245759	0.337871	-0.727375	0.466996	0.954767
AC061975.1	0.842599	-0.540097	1.35624	-0.39823	0.690461	NA
AC061975.5	0.907309	0.073212	1.25927	0.0581383	0.953638	NA
AC061992.1	25.7056	-0.00165872	0.264238	-0.00627739	0.994991	0.999851
AC061999.1	0.749896	-0.728671	1.54485	-0.471678	0.637157	NA
AC062015.1	6.03461	0.0945352	0.623038	0.151733	0.879398	NA
AC062017.1	18.7104	0.0932451	0.300627	0.310168	0.756433	0.97951
AC062028.2	4.71189	-0.418663	0.564177	-0.742077	0.458041	NA
AC062029.1	16.078	0.0793811	0.311233	0.255054	0.798681	0.9822
AC062037.2	1.33472	1.24375	1.2315	1.00995	0.312517	NA
AC063943.1	1.29113	-0.684046	1.08984	-0.627659	0.530227	NA
AC063944.1	0.389139	2.29712	1.77871	1.29145	0.196547	NA
AC063944.2	0.704054	0.520143	1.81784	0.286132	0.774777	NA
AC063947.2	7.83708	-0.433751	0.415564	-1.04376	0.296595	NA
AC063952.2	0.396401	1.9074	2.16884	0.879456	0.379154	NA
AC063952.4	0.421558	-0.360102	1.84291	-0.195399	0.845081	NA
AC063965.1	1.56833	1.45746	1.14049	1.27793	0.201275	NA
AC064799.1	32.6939	-0.101551	0.261287	-0.388658	0.697529	0.973183
AC064801.1	0.625949	-0.637138	1.36754	-0.4659	0.641287	NA
AC064807.1	33.8794	0.157241	0.241222	0.651853	0.514496	0.958407
AC064836.1	4.95079	0.0312469	0.570301	0.0547902	0.956306	NA
AC064836.3	14.9255	0.0461402	0.317095	0.145509	0.884309	0.99054
AC064847.1	0.37477	0.73285	1.87155	0.391574	0.695373	NA
AC064850.1	132.18	0.011928	0.109158	0.109273	0.912986	0.993297
AC064852.1	0.6297	-0.229315	1.48779	-0.154131	0.877506	NA
AC064875.1	0.686504	-1.74814	1.47818	-1.18263	0.236956	NA
AC067735.1	12.8	-0.691697	0.349115	-1.98129	0.0475587	NA
AC067750.1	40.6385	0.472062	0.250846	1.88188	0.0598523	0.925697
AC067838.1	6.74289	0.819332	0.443063	1.84924	0.0644229	NA
AC067852.2	585.304	0.0381208	0.08691	0.438624	0.660934	0.968658
AC067852.3	0.350146	-1.02755	1.86229	-0.551768	0.581108	NA
AC067904.2	23.2128	0.205943	0.261336	0.788039	0.430674	0.952291
AC067930.3	1.71078	2.0154	1.27917	1.57555	0.11513	NA
AC067930.4	1.40422	-0.0170798	0.919435	-0.0185764	0.985179	NA
AC067930.6	20.2456	-1.0869	0.450976	-2.4101	0.015948	0.778757
AC067931.1	1.53651	-1.10738	1.02216	-1.08337	0.278645	NA
AC067942.1	0.362596	0.73285	1.82992	0.400483	0.688801	NA
AC067942.2	10.496	0.149851	0.426192	0.351603	0.725136	NA
AC067942.3	0.348646	0.73285	2.04651	0.358097	0.720271	NA
AC067945.1	2.46861	-0.0821458	0.710566	-0.115606	0.907965	NA
AC067956.1	1.36808	-0.610606	1.04614	-0.583676	0.559439	NA
AC068025.1	6.48805	-0.0353926	0.47145	-0.0750717	0.940158	NA
AC068134.1	2.18666	-0.44782	1.15175	-0.388816	0.697413	NA
AC068134.2	3.95083	0.882177	0.885457	0.996296	0.319106	NA
AC068134.3	3.19035	0.742851	0.76063	0.976626	0.328754	NA
AC068137.1	8.70434	-0.289389	0.412411	-0.7017	0.482866	NA
AC068138.1	4.53159	-0.608322	0.494828	-1.22936	0.218937	NA
AC068152.1	82.0168	-0.24426	0.123116	-1.98398	0.0472578	0.896545
AC068205.2	9.71865	-0.589566	0.394784	-1.49339	0.135335	NA
AC068234.2	1.89418	-0.191319	0.900851	-0.212376	0.831814	NA
AC068282.1	39.8716	-0.231476	0.209816	-1.10323	0.269926	0.946269
AC068305.1	0.933218	-0.250879	1.07725	-0.232888	0.815848	NA
AC068338.2	66.2234	-0.13238	0.164984	-0.802382	0.422332	0.952192
[truncated: 23,383 more rows]

## Sheet: Fig3 C,D fold changes
Sample_ID	Cell_line	Time	TNF	TNF_dose	SR	Sample_name	A4GALT	OSER1	AC079140.2	AKTIP	APAF1	RPS15A	CEBPG	CYP4V2	TMEM50B	EIF3J-AS1	HCFC1	ZNF264	ITGA6	LMO7	MOSMO	AC010374.2	AC136632.1	PRRG2	AL590399.1	CASP8AP2	SNPH	CNST	DNAJC22	FAM122A	XPOTP1	HSD17B14	KRT18P11	AL133523.1	AAAS	OSER1-AS1	AC079145.1	AL008721.2	APBA3	RPS15AP1	CEBPZ	CYP51A1	TMEM51	EIF3K	HCFC1R1	ZNF266	ITGA7	LMTK2	MOSPD1
Sample_H970001	MIA PaCa2	1	No	0	No	MIA_1hr_0TNF	0	0	0	0	0	0	0	0	0	0	0	0	0	0	0	0	0	0	0	0	0	0	0	0	0	0	0	0	0	0	0	0	0	0	0	0	0	0	0	0	0	0	0
Sample_H970002	MIA PaCa2	5	No	0	No	MIA_5hr_0TNF	0	0	0	0	0	0	0	0	0	0	0	0	0	0	0	0	0	0	0	0	0	0	0	0	0	0	0	0	0	0	0	0	0	0	0	0	0	0	0	0	0	0	0
Sample_H970003	MIA PaCa2	1	Yes	0.01	No	MIA_1hr_0.01TNF	-0.398164	0.113143	-0.388383	0.0959958	0.0330806	0.103307	-0.025015	0.148883	0.143748	-0.146905	-0.0426346	0.215076	0.079783	0.121941	0.0245559	-0.540386	-0.349614	-0.066455	-0.540386	0.181918	-0.266393	0.299587	-0.0363978	-0.10695	-0.955424	-0.0586777	-0.00115494	0.611617	0.00117667	0.329846	-0.388383	-1.80342	0.051416	0.153511	0.11113	-0.383964	-0.148871	0.0159826	0.137885	0.00858965	-0.57601	-0.0519459	-0.0355021
Sample_H970004	MIA PaCa2	5	Yes	0.01	No	MIA_5hr_0.01TNF	-0.158421	0.0470227	-0.402346	0.105632	0.0628952	0.00615563	0.0294969	-0.0312704	-0.0346144	-0.185388	0.0603612	0.00548199	-0.0200455	-0.0949177	-0.0967199	0.794051	0.150587	0.393513	-0.167881	0.0381819	-0.159645	0.0817475	-0.129566	0.182616	-0.317457	0.334619	0.039598	-0.45893	-0.0446904	-0.35172	-3.53985	-2.08042	0.137019	-0.036024	0.0900062	-0.414837	0.153125	0.0391392	-0.0719399	-0.0804181	-1.15081	0.0217623	0.151707
Sample_H970005	MIA PaCa2	1	Yes	0.1	No	MIA_1hr_0.1TNF	-0.447329	0.0289842	-0.919699	-0.183101	0.0437746	-0.0849406	5.92028e-05	-0.230431	-0.119372	-0.222398	0.184803	0.114031	-0.00920148	0.176059	-0.00809461	1.30269	-0.259988	1.41817	0.228692	-0.00327759	-0.347365	0.262406	0.0845128	-0.164812	-0.931772	-0.0487794	-0.253618	0.71773	-0.0919796	-0.329575	-1.28227	-0.697307	0.0141654	0.21523	-0.0194722	-0.163392	0.0388806	0.0267871	-0.149567	0.158647	-1.05486	0.100282	0.0500501
Sample_H970006	MIA PaCa2	5	Yes	0.1	No	MIA_5hr_0.1TNF	-0.331263	0.00777022	0.331702	-0.142761	-0.0498263	-0.0483455	0.0716074	-0.211032	-0.0836803	-0.253261	0.152795	-0.0941941	-0.153519	0.360271	0.0654219	-0.0308681	0.346029	-0.516295	0.182839	0.0316205	-0.453794	0.0706561	-0.34591	-0.190525	-0.168372	-0.0017218	-0.00113094	0.438617	-0.0547757	-0.382544	-1.71269	0.916664	0.486011	0.769107	-0.0361748	-0.444485	0.17782	0.0458713	-0.152025	-0.2221	0.0548617	0.207374	0.0592829
Sample_H970007	MIA PaCa2	1	Yes	10	No	MIA_1hr_10TNF	-0.18112	0.0726839	-0.0160603	-0.150451	0.0312454	0.00153007	-0.0836053	-0.170672	0.0335502	-0.0407223	0.0315935	0.117206	-0.0539514	0.155211	0.196714	1.46937	-0.273492	1.20633	0.519993	-0.0175198	-0.237275	0.291393	-0.0415954	-0.0585436	-0.480007	-0.470626	-0.263421	0.514454	-0.00781891	0.159026	-0.0160603	-0.0160603	0.058381	0.38833	-0.0117997	-0.0519055	0.0147184	-0.0383245	-0.22454	0.212845	-0.673173	0.0170251	0.0012177
Sample_H970008	MIA PaCa2	5	Yes	10	No	MIA_5hr_10TNF	0.488346	0.139448	-0.344646	-0.138993	-0.222209	0.255093	0.323719	-0.486551	-0.16218	-0.048253	0.0462397	-0.0384628	-0.448864	0.440341	-0.0491439	0.499235	0.368872	-0.893083	-0.225658	-0.241121	-1.39903	0.0540353	-0.649157	-0.362568	-0.519624	-0.115475	-0.123209	0.82433	-0.0595208	-0.0450857	-1.18259	0.276842	0.552644	0.634394	-0.158563	-0.148179	0.438035	0.0165468	-0.309538	-0.136097	-0.115475	0.0495395	0.214346
Sample_H970009	MIA PaCa2	1	No	0	Yes	MIA_1hr_0TNF_SR	-0.415729	-0.103294	0.74933	-0.277498	0.151429	0.154494	-0.0780861	0.133245	-0.201059	0.259005	0.0253941	0.389085	0.0471817	0.0541851	0.0373112	0.0123649	0.265306	-0.665707	-0.81771	0.0639464	-0.455489	0.212595	0.116113	-0.178441	-0.402673	0.482392	-0.102996	0.74933	-0.124565	-0.619903	-1.66571	0.334293	-0.125506	0.639148	-0.0397689	-0.0955719	-0.124167	-0.0814811	-0.280941	-0.149829	-0.438297	-0.195558	-0.401707
Sample_H970010	MIA PaCa2	5	No	0	Yes	MIA_5hr_0TNF_SR	-0.0935732	-0.0451406	0.154354	-0.0112706	0.115412	0.0990539	0.0126687	0.093078	-0.17068	-0.105646	-0.0145477	-0.0164561	-0.0141842	0.00874898	-0.0836115	0.569392	0.567663	-1.53014	-0.670074	-0.0789162	-0.156603	0.0871453	0.119421	0.000370841	0.311594	0.346999	0.0363255	-1.54609	-0.117388	-0.653001	-0.627005	0.417389	0.20352	0.613786	-0.0546918	-0.13803	0.0462331	-0.0276579	0.0208134	-0.0819651	-0.974929	0.074226	0.0115163
Sample_H970011	MIA PaCa2	1	Yes	0.1	Yes	MIA_1hr_0.1TNF_SR	-0.473867	0.0318545	-0.097304	-0.432122	0.16859	0.217282	-0.0861716	-0.169454	-0.104331	-0.134457	0.066408	0.233902	0.00673161	-0.134141	0.100922	-0.419232	0.45166	0.487659	-0.171305	0.0495845	-0.39469	0.293949	0.0123205	-0.0876753	0.10433	-0.352561	-0.165116	0.317734	-0.131689	-0.351061	-0.682266	1.36213	-0.129993	0.815233	-0.0878529	-0.491836	-0.0589322	-0.0265289	-0.0409048	0.137161	-0.596875	-0.104493	-0.0857623
Sample_H970012	MIA PaCa2	5	Yes	0.1	Yes	MIA_5hr_0.1TNF_SR	-0.0208392	0.0258659	-0.351179	-0.104274	-0.176751	0.216221	0.137391	-0.00563884	-0.13991	-0.199176	0.0175398	0.103147	-0.0471733	-0.0486167	0.00222251	0.916301	0.587044	-1.04717	0.4138	-0.0390683	-0.199176	0.11477	-0.566686	0.036891	-0.599714	0.108946	-0.0112103	0.100384	-0.129598	-0.470478	-1.33668	-1.19918	-0.0186042	0.608179	-0.0242663	-0.367858	0.172583	-0.062374	-0.242331	-0.224599	0.266487	0.0830926	0.153365
Sample_H970013	MIA PaCa2	1	Yes	10	Yes	MIA_1hr_10TNF_SR	-0.61553	0.1081	0.265736	-0.084849	0.230818	0.272328	-0.0311163	0.0374669	-0.106007	-0.0616511	0.187246	0.028292	-0.0363329	0.327136	0.123264	0.134491	0.381532	1.13449	0.456419	0.0503979	-0.318765	0.251305	0.0763884	-0.133705	0.593923	0.054321	-0.160838	0.665006	-0.215019	0.0871857	0.134491	0.134491	-0.41277	0.879919	-0.104751	0.0336907	-0.261233	-0.051122	-0.216485	0.134491	-0.830743	0.0149245	-0.107834
Sample_H970014	MIA PaCa2	5	Yes	10	Yes	MIA_5hr_10TNF_SR	0.604597	0.430092	0.282669	-0.282689	-0.2727	0.481093	0.32649	-0.652735	-0.533682	-0.19487	-0.055322	0.364394	-0.383124	0.14065	-0.038246	-0.395403	1.28698	0.292653	-0.0234338	-0.433145	-1.12504	0.105927	-0.719057	-0.233813	0.769657	1.78214	-0.163112	1.11361	-0.332938	0.119171	-0.395403	0.18956	-0.113259	0.604597	-0.204163	0.118175	0.203322	-0.0209825	-0.136626	-0.376625	0.421733	0.0240401	0.542102
Sample_H970015	PANC1	1	No	0	No	PANC1_1hr_0TNF	0	0	0	0	0	0	0	0	0	0	0	0	0	0	0	0	0	0	0	0	0	0	0	0	0	0	0	0	0	0	0	0	0	0	0	0	0	0	0	0	0	0	0
Sample_H970016	PANC1	5	No	0	No	PANC1_5hr_0TNF	0	0	0	0	0	0	0	0	0	0	0	0	0	0	0	0	0	0	0	0	0	0	0	0	0	0	0	0	0	0	0	0	0	0	0	0	0	0	0	0	0	0	0
Sample_H970017	PANC1	1	Yes	0.01	No	PANC1_1hr_0.01TNF	0.0629176	-0.0212612	0.0559982	-0.0825395	-0.106202	0.0248773	0.064339	0.658239	0.148755	0.4583	0.0564044	-0.00571604	0.0649869	-0.0538404	-0.142495	0.377926	-0.287514	0.126387	-0.613085	0.1413	0.145609	0.115627	-0.0981728	0.0418912	-0.820173	-0.0816328	-0.00525827	-0.914254	0.000317274	0.491384	-0.873613	-1.23618	-0.0405138	0.190518	0.0366847	-0.0292634	0.102758	-0.0667476	0.0778218	0.148083	0.258213	0.15667	-0.0513816
Sample_H970018	PANC1	5	Yes	0.01	No	PANC1_5hr_0.01TNF	-0.116758	-0.0466954	0.489795	0.00421269	0.182817	0.0501272	-0.041059	0.230763	0.0145376	-0.0749071	-0.0695349	0.0642914	-0.0103641	-0.0716126	0.11837	-0.195163	0.209028	0.322685	-0.0171648	0.0166235	-0.00750168	-0.0279041	0.122387	-0.0482268	0.552368	0.118583	0.0483769	0.737723	-0.0629685	0.191234	0.474688	-0.557733	-0.1323	0.15276	0.00861283	0.127043	0.046705	-0.0661408	0.0611298	0.125487	0.0226997	-0.0400059	0.000757132
Sample_H970019	PANC1	1	Yes	0.1	No	PANC1_1hr_0.1TNF	-0.0943834	-0.120669	0.144105	-0.184843	-0.177758	-0.0565861	-0.00783804	0.494366	0.0893234	0.133663	0.0144289	0.146323	-0.00861867	-0.082675	0.00331126	0.488059	0.139375	-0.900983	-0.579055	-0.0630142	0.151446	-0.017354	0.459419	-0.104778	-0.606536	0.21096	-0.112734	-0.427052	-0.100202	1.07699	0.214494	-0.164018	0.0222411	-0.217457	-0.0369222	-0.0445105	-0.00163532	-0.0768337	0.0905286	0.288242	0.0583749	0.125871	-0.118626
Sample_H970020	PANC1	5	Yes	0.1	No	PANC1_5hr_0.1TNF	0.196252	-0.135955	0.845251	-0.0544627	-0.0006488	0.0269619	-0.00563163	-0.0877174	-0.221939	-0.0492475	0.0329403	-0.0170533	0.0843856	-0.0463052	0.0839545	0.328892	-0.143861	-2.95122	0.200788	-0.130057	-0.180519	-0.0856849	-0.28825	-0.00392249	0.138052	0.114802	0.00268007	1.13625	-0.0828311	0.124733	-0.366253	0.0487846	0.0286067	0.0253256	-0.00686347	-0.188983	0.234423	-0.0461227	0.0579397	0.231263	-0.0543089	0.0325983	-0.127603
Sample_H970021	PANC1	1	Yes	10	No	PANC1_1hr_10TNF	-0.259894	0.125201	-1.1688	-0.054802	0.148895	-0.00103644	-0.0143815	0.831989	0.0626389	-0.0929568	0.0601429	-0.0437206	0.0381636	-0.0971439	0.0161842	0.416162	0.0168514	1.02712	-0.650952	-0.0214102	0.101837	0.224352	-0.744928	-0.288702	-0.919441	0.119273	-0.179044	-2.82088	-0.110988	0.696971	-0.387918	-1.82088	-0.0164383	0.211544	-0.0384101	-0.0457309	-0.059638	-0.0514794	-0.0043541	0.142597	0.199022	0.0470911	-0.187335
Sample_H970022	PANC1	5	Yes	10	No	PANC1_5hr_10TNF	0.326401	0.210115	1.17042	-0.145531	0.0708861	0.167034	0.253093	-0.627587	-0.431788	-0.183725	-0.0418008	0.20869	-0.196961	-0.386724	0.076849	-0.674408	0.467931	-0.545125	-0.0369779	-0.299055	-0.470228	0.379784	0.302872	-0.382551	0.250784	0.14735	0.121715	0.833387	-0.0571558	0.0109566	0.132947	-0.577546	0.369324	0.223145	-0.0732312	-0.0517092	0.755234	0.0656181	0.186289	0.247177	-0.477106	-0.0832463	-0.290173
Sample_H970023	PANC1	1	No	0	Yes	PANC1_1hr_0TNF_SR	-0.0895314	0.128096	0.0020991	-0.168659	-0.130285	0.129522	0.188709	0.0432238	0.16197	0.159951	0.0128924	0.131382	0.0639886	-0.0565686	0.216767	0.850096	-0.192594	0.866038	-0.020621	0.0626658	0.21889	0.134246	-0.474	-0.245127	-0.286198	-0.0987116	-0.0338107	-0.775508	-0.0888941	0.613057	0.0724884	-0.171437	-0.341983	0.0460162	0.0545093	-0.227745	-0.0851196	-0.0149241	0.043484	0.209992	0.2562	0.0150513	0.133401
Sample_H970024	PANC1	5	No	0	Yes	PANC1_5hr_0TNF_SR	0.139473	0.0435721	0.32119	-0.0268075	0.0696508	0.172189	-0.0438345	-0.217479	-0.0900324	0.0455552	0.0405859	-0.0601229	0.11924	0.058852	0.296673	0.145091	-0.214204	0.21548	0.161032	-0.0259286	0.145436	0.0469351	-0.585211	0.0584365	-0.261106	0.243618	0.062241	-0.954445	-0.077549	-0.0346152	0.367483	0.123558	-0.553134	-0.00175055	0.0437817	0.153562	-0.299321	0.0321089	0.0907608	0.1038	0.0204642	0.0665799	0.118629
Sample_H970025	PANC1	1	Yes	0.1	Yes	PANC1_1hr_0.1TNF_SR	0.172065	0.139757	-0.0679386	-0.181188	0.0196426	0.226552	0.117054	0.461789	0.0806128	-0.0812599	0.201825	0.0889149	0.0940812	0.0253304	0.102444	-0.248511	0.028102	-0.0850121	0.143807	0.195959	0.340603	0.124193	-0.018341	-0.264145	-0.169076	0.19029	0.0391716	-3.34805	-0.0926113	0.0994125	0.37442	-0.669975	-0.300412	-0.0850121	-0.0584566	0.176656	-0.102039	-0.098834	0.185221	0.249972	0.0366174	0.153775	0.00387094
Sample_H970026	PANC1	5	Yes	0.1	Yes	PANC1_5hr_0.1TNF_SR	-0.00481755	0.206674	0.711654	-0.233361	0.0720847	0.212066	0.121223	-0.126928	-0.0776414	0.00839039	-0.158752	0.0656569	0.0137861	0.0977784	0.270998	-0.432736	-0.071989	-1.43274	-0.354734	-0.183442	-0.100161	0.183635	-0.558267	-0.222409	-0.899862	0.213627	0.194893	1.15223	0.0815028	0.215791	0.567264	-0.0176988	-0.530711	0.860995	0.0577455	0.116092	-0.150656	0.015253	0.104767	0.313923	-0.0427898	-0.00420773	0.140898
Sample_H970027	PANC1	1	Yes	10	Yes	PANC1_1hr_10TNF_SR	0.213145	0.243643	-0.139527	-0.10637	0.0552536	0.115136	0.125467	0.218788	0.14957	0.433363	0.10302	0.0329609	0.0546845	0.0942876	0.0517171	0.70847	-0.33422	1.1939	-0.95366	0.00596416	0.259512	0.385776	-0.404122	-0.256444	-0.47513	0.083885	0.0750553	-0.431707	0.00222461	1.01575	0.0239721	0.0239721	-0.176706	0.0563936	0.0460227	0.0563936	0.0713618	-0.0115218	0.150013	0.156998	-0.123585	0.0981038	0.0629662
Sample_H970028	PANC1	5	Yes	10	Yes	PANC1_5hr_10TNF_SR	0.724043	0.610298	0.504426	-0.471285	0.508268	0.244773	0.246673	-0.652036	-0.371348	0.206863	0.341771	0.961353	-0.264408	-0.133905	0.296855	-0.376929	-0.187704	-0.154537	0.1991	0.0832067	-0.441556	0.521808	-0.569574	0.0779863	0.420157	0.250818	0.117174	1.65282	-0.40163	0.765293	-0.569574	-1.32446	-0.374502	0.445856	-0.0685343	-0.159644	0.28191	-0.121298	0.22368	0.268583	0.196936	0.158724	0.0745183
[truncated: 5,000 more columns]

## Sheet: Fig3Supp1B
Protein	DMSO	TNF 0.01 Rep1	TNF 0.01 Rep2	TNF 0.1 Rep1	TNF 0.1 Rep2	TNF 10
NFKBIB	109.864	110.132	-24.0331	-10.3163	-51.223	-134.424
NFKBIA	139.79	66.0714	-4.15461	-57.3832	-38.0831	-106.241
REL	24.7625	18.6326	-13.7255	16.144	-10.5455	-35.268
NFKBIE	93.248	87.274	-5.47926	-13.9978	-52.6107	-108.434
NFKB1	-17.3607	-0.0449157	-4.23799	9.1674	4.96417	7.51203
NFKB2	-28.7069	12.5187	-0.104198	23.7689	-7.8877	0.411209
RELA	0	0	0	0	0	0
