# Supplementary material for: Actin networks modulate heterogeneous NF-κB dynamics in response to TNFα
Source: eLife. 2024 Aug 7;13:e86042. doi: 10.7554/eLife.86042 (PMC11524587; doi:10.7554/eLife.86042)
Supplement: Figure 4—source data 1. — Raw data from live microscopy image analysis of nuclear RELA and the area under the curve (AUC) from Figure 4 and Figure 4—figure supplement 2. Quantification by qPCR of RNA abundance for MIA PaCa2 cells expressing RELA-GFP and treated with various siRNAs for 48 hr prior to control/TNFα treatment. [file elife-86042-fig4-data1.xlsx]

## Sheet: Fig4 A,B
siRNA	Timepoint	Time_after_TNF_min	Time_after_TNF_hr	Cell_line	Treatment	Bio_rep	Well	Well_ID	Nuc_RELA_mean	Nuc_RELA_norm	Nuc_RELA_SG
ARHGAP31	1	-120	-2	MIA PaCa2	TNF	1	4_10	Rep1_4_10	311.781	1.00833	1.01166
ARHGAP31	2	-110	-1.83333	MIA PaCa2	TNF	1	4_10	Rep1_4_10	305.835	1.01738	1.00901
ARHGAP31	3	-100	-1.66667	MIA PaCa2	TNF	1	4_10	Rep1_4_10	297.824	0.992993	1.00636
ARHGAP31	4	-90	-1.5	MIA PaCa2	TNF	1	4_10	Rep1_4_10	298.887	1.01852	1.00371
ARHGAP31	5	-80	-1.33333	MIA PaCa2	TNF	1	4_10	Rep1_4_10	290.045	0.984689	1.00437
ARHGAP31	6	-70	-1.16667	MIA PaCa2	TNF	1	4_10	Rep1_4_10	295.282	1.01834	1.00204
ARHGAP31	7	-60	-1	MIA PaCa2	TNF	1	4_10	Rep1_4_10	287.437	0.985733	1.00115
ARHGAP31	8	-50	-0.833333	MIA PaCa2	TNF	1	4_10	Rep1_4_10	292.127	1.01292	0.998211
ARHGAP31	9	-40	-0.666667	MIA PaCa2	TNF	1	4_10	Rep1_4_10	287.444	1.0011	1.00296
ARHGAP31	10	-30	-0.5	MIA PaCa2	TNF	1	4_10	Rep1_4_10	281.016	0.986741	1.00007
ARHGAP31	11	-20	-0.333333	MIA PaCa2	TNF	1	4_10	Rep1_4_10	285.552	0.997949	1.08363
ARHGAP31	12	-10	-0.166667	MIA PaCa2	TNF	1	4_10	Rep1_4_10	288.783	1.01791	1.16696
ARHGAP31	13	0	0	MIA PaCa2	TNF	1	4_10	Rep1_4_10	282.764	0.99814	1.25121
ARHGAP31	14	10	0.166667	MIA PaCa2	TNF	1	4_10	Rep1_4_10	436.639	1.57062	1.3361
ARHGAP31	15	20	0.333333	MIA PaCa2	TNF	1	4_10	Rep1_4_10	449.782	1.59626	1.42139
ARHGAP31	16	30	0.5	MIA PaCa2	TNF	1	4_10	Rep1_4_10	444.864	1.59087	1.50257
ARHGAP31	17	40	0.666667	MIA PaCa2	TNF	1	4_10	Rep1_4_10	442.72	1.58095	1.58655
ARHGAP31	18	50	0.833333	MIA PaCa2	TNF	1	4_10	Rep1_4_10	443.204	1.59498	1.58725
ARHGAP31	19	60	1	MIA PaCa2	TNF	1	4_10	Rep1_4_10	440.826	1.5862	1.58244
ARHGAP31	20	70	1.16667	MIA PaCa2	TNF	1	4_10	Rep1_4_10	438.414	1.58599	1.58021
ARHGAP31	21	80	1.33333	MIA PaCa2	TNF	1	4_10	Rep1_4_10	435.698	1.57548	1.57714
ARHGAP31	22	90	1.5	MIA PaCa2	TNF	1	4_10	Rep1_4_10	436.234	1.56258	1.57023
ARHGAP31	23	100	1.66667	MIA PaCa2	TNF	1	4_10	Rep1_4_10	434.425	1.57532	1.56499
ARHGAP31	24	110	1.83333	MIA PaCa2	TNF	1	4_10	Rep1_4_10	432.617	1.55941	1.55778
ARHGAP31	25	120	2	MIA PaCa2	TNF	1	4_10	Rep1_4_10	429.715	1.54664	1.55294
ARHGAP31	26	130	2.16667	MIA PaCa2	TNF	1	4_10	Rep1_4_10	429.757	1.5495	1.54693
ARHGAP31	27	140	2.33333	MIA PaCa2	TNF	1	4_10	Rep1_4_10	425.497	1.53554	1.54032
ARHGAP31	28	150	2.5	MIA PaCa2	TNF	1	4_10	Rep1_4_10	425.244	1.54157	1.53679
ARHGAP31	29	160	2.66667	MIA PaCa2	TNF	1	4_10	Rep1_4_10	420.168	1.5205	1.53259
ARHGAP31	30	170	2.83333	MIA PaCa2	TNF	1	4_10	Rep1_4_10	421.245	1.5291	1.52784
ARHGAP31	31	180	3	MIA PaCa2	TNF	1	4_10	Rep1_4_10	424.777	1.53471	1.5236
ARHGAP31	32	190	3.16667	MIA PaCa2	TNF	1	4_10	Rep1_4_10	420.702	1.51725	1.51979
ARHGAP31	33	200	3.33333	MIA PaCa2	TNF	1	4_10	Rep1_4_10	419.84	1.51619	1.5156
ARHGAP31	34	210	3.5	MIA PaCa2	TNF	1	4_10	Rep1_4_10	418.699	1.50592	1.50902
ARHGAP31	35	220	3.66667	MIA PaCa2	TNF	1	4_10	Rep1_4_10	418.363	1.51485	1.49534
ARHGAP31	36	230	3.83333	MIA PaCa2	TNF	1	4_10	Rep1_4_10	410.176	1.49119	1.48728
ARHGAP31	37	240	4	MIA PaCa2	TNF	1	4_10	Rep1_4_10	406.19	1.48305	1.47917
ARHGAP31	38	250	4.16667	MIA PaCa2	TNF	1	4_10	Rep1_4_10	401.57	1.43896	1.47326
ARHGAP31	39	260	4.33333	MIA PaCa2	TNF	1	4_10	Rep1_4_10	405.655	1.46081	1.46834
ARHGAP31	40	270	4.5	MIA PaCa2	TNF	1	4_10	Rep1_4_10	404.25	1.45943	1.46562
ARHGAP31	41	280	4.66667	MIA PaCa2	TNF	1	4_10	Rep1_4_10	406.228	1.46456	1.4626
ARHGAP31	42	290	4.83333	MIA PaCa2	TNF	1	4_10	Rep1_4_10	408.181	1.4804	1.46913
ARHGAP31	43	300	5	MIA PaCa2	TNF	1	4_10	Rep1_4_10	404.71	1.47211	1.46977
ARHGAP31	44	310	5.16667	MIA PaCa2	TNF	1	4_10	Rep1_4_10	407.208	1.46195	1.47401
ARHGAP31	45	320	5.33333	MIA PaCa2	TNF	1	4_10	Rep1_4_10	408.348	1.48466	1.47884
ARHGAP31	46	330	5.5	MIA PaCa2	TNF	1	4_10	Rep1_4_10	409.032	1.46532	1.47666
ARHGAP31	47	340	5.66667	MIA PaCa2	TNF	1	4_10	Rep1_4_10	412.778	1.48908	1.47652
ARHGAP31	48	350	5.83333	MIA PaCa2	TNF	1	4_10	Rep1_4_10	419.085	1.49837	1.47511
ARHGAP31	49	360	6	MIA PaCa2	TNF	1	4_10	Rep1_4_10	406.13	1.46511	1.46815
ARHGAP31	50	370	6.16667	MIA PaCa2	TNF	1	4_10	Rep1_4_10	411.502	1.47117	1.46774
ARHGAP31	51	380	6.33333	MIA PaCa2	TNF	1	4_10	Rep1_4_10	407.364	1.45208	1.45876
ARHGAP31	52	390	6.5	MIA PaCa2	TNF	1	4_10	Rep1_4_10	406.732	1.43592	1.45352
ARHGAP31	53	400	6.66667	MIA PaCa2	TNF	1	4_10	Rep1_4_10	414.954	1.46242	1.45319
ARHGAP31	54	410	6.83333	MIA PaCa2	TNF	1	4_10	Rep1_4_10	406.799	1.42624	1.45233
ARHGAP31	55	420	7	MIA PaCa2	TNF	1	4_10	Rep1_4_10	411.651	1.46167	1.45716
ARHGAP31	56	430	7.16667	MIA PaCa2	TNF	1	4_10	Rep1_4_10	415.18	1.4628	1.46447
ARHGAP31	57	440	7.33333	MIA PaCa2	TNF	1	4_10	Rep1_4_10	416.027	1.46516	1.46726
ARHGAP31	58	450	7.5	MIA PaCa2	TNF	1	4_10	Rep1_4_10	421.109	1.48593	1.47537
ARHGAP31	59	460	7.66667	MIA PaCa2	TNF	1	4_10	Rep1_4_10	420.666	1.48709	1.48213
ARHGAP31	60	470	7.83333	MIA PaCa2	TNF	1	4_10	Rep1_4_10	421.856	1.48194	1.49442
ARHGAP31	61	480	8	MIA PaCa2	TNF	1	4_10	Rep1_4_10	422.595	1.48299	1.49354
ARHGAP31	62	490	8.16667	MIA PaCa2	TNF	1	4_10	Rep1_4_10	427.337	1.50898	1.49264
ARHGAP31	63	500	8.33333	MIA PaCa2	TNF	1	4_10	Rep1_4_10	441.4	1.5489	1.49234
ARHGAP31	64	510	8.5	MIA PaCa2	TNF	1	4_10	Rep1_4_10	416.922	1.45898	1.49876
ARHGAP31	65	520	8.66667	MIA PaCa2	TNF	1	4_10	Rep1_4_10	422.626	1.47958	1.49771
ARHGAP31	66	530	8.83333	MIA PaCa2	TNF	1	4_10	Rep1_4_10	424.353	1.485	1.49496
ARHGAP31	67	540	9	MIA PaCa2	TNF	1	4_10	Rep1_4_10	438.147	1.52693	1.48406
ARHGAP31	68	550	9.16667	MIA PaCa2	TNF	1	4_10	Rep1_4_10	421.858	1.47557	1.4843
ARHGAP31	69	560	9.33333	MIA PaCa2	TNF	1	4_10	Rep1_4_10	424.74	1.48974	1.48361
ARHGAP31	70	570	9.5	MIA PaCa2	TNF	1	4_10	Rep1_4_10	421.142	1.47262	1.48168
ARHGAP31	71	580	9.66667	MIA PaCa2	TNF	1	4_10	Rep1_4_10	415.666	1.46067	1.46906
ARHGAP31	72	590	9.83333	MIA PaCa2	TNF	1	4_10	Rep1_4_10	427.658	1.47475	1.46662
ARHGAP31	73	600	10	MIA PaCa2	TNF	1	4_10	Rep1_4_10	425.546	1.47149	1.46084
ARHGAP31	74	610	10.1667	MIA PaCa2	TNF	1	4_10	Rep1_4_10	420.948	1.43859	1.46349
ARHGAP31	75	620	10.3333	MIA PaCa2	TNF	1	4_10	Rep1_4_10	422.922	1.45851	1.4568
ARHGAP31	76	630	10.5	MIA PaCa2	TNF	1	4_10	Rep1_4_10	421.271	1.44928	1.45004
ARHGAP31	77	640	10.6667	MIA PaCa2	TNF	1	4_10	Rep1_4_10	430.706	1.49116	1.4458
ARHGAP31	78	650	10.8333	MIA PaCa2	TNF	1	4_10	Rep1_4_10	409.639	1.41383	1.44626
ARHGAP31	79	660	11	MIA PaCa2	TNF	1	4_10	Rep1_4_10	412.989	1.42742	1.43579
ARHGAP31	80	670	11.1667	MIA PaCa2	TNF	1	4_10	Rep1_4_10	415.867	1.44179	1.43492
ARHGAP31	81	680	11.3333	MIA PaCa2	TNF	1	4_10	Rep1_4_10	417.757	1.44182	1.43802
ARHGAP31	82	690	11.5	MIA PaCa2	TNF	1	4_10	Rep1_4_10	401.344	1.38521	1.44245
ARHGAP31	83	700	11.6667	MIA PaCa2	TNF	1	4_10	Rep1_4_10	416.669	1.44325	1.43973
ARHGAP31	84	710	11.8333	MIA PaCa2	TNF	1	4_10	Rep1_4_10	433.703	1.51286	1.44093
ARHGAP31	85	720	12	MIA PaCa2	TNF	1	4_10	Rep1_4_10	416.335	1.44483	1.44212
ARHGAP31	86	730	12.1667	MIA PaCa2	TNF	1	4_10	Rep1_4_10	409.592	1.40837	1.44331
ARHGAP31	1	-120	-2	MIA PaCa2	TNF	1	4_11	Rep1_4_11	322.613	1.04336	1.05145
ARHGAP31	2	-110	-1.83333	MIA PaCa2	TNF	1	4_11	Rep1_4_11	318.721	1.06025	1.04607
ARHGAP31	3	-100	-1.66667	MIA PaCa2	TNF	1	4_11	Rep1_4_11	312.508	1.04195	1.0407
ARHGAP31	4	-90	-1.5	MIA PaCa2	TNF	1	4_11	Rep1_4_11	300.478	1.02394	1.03532
ARHGAP31	5	-80	-1.33333	MIA PaCa2	TNF	1	4_11	Rep1_4_11	302.142	1.02576	1.03373
ARHGAP31	6	-70	-1.16667	MIA PaCa2	TNF	1	4_11	Rep1_4_11	301.487	1.03974	1.02851
ARHGAP31	7	-60	-1	MIA PaCa2	TNF	1	4_11	Rep1_4_11	295.175	1.01227	1.02425
ARHGAP31	8	-50	-0.833333	MIA PaCa2	TNF	1	4_11	Rep1_4_11	297.698	1.03223	1.02402
ARHGAP31	9	-40	-0.666667	MIA PaCa2	TNF	1	4_11	Rep1_4_11	293.932	1.0237	1.02604
ARHGAP31	10	-30	-0.5	MIA PaCa2	TNF	1	4_11	Rep1_4_11	288.241	1.01211	1.02571
ARHGAP31	11	-20	-0.333333	MIA PaCa2	TNF	1	4_11	Rep1_4_11	292.533	1.02235	1.11145
ARHGAP31	12	-10	-0.166667	MIA PaCa2	TNF	1	4_11	Rep1_4_11	295.013	1.03987	1.19327
ARHGAP31	13	0	0	MIA PaCa2	TNF	1	4_11	Rep1_4_11	293.903	1.03746	1.2791
ARHGAP31	14	10	0.166667	MIA PaCa2	TNF	1	4_11	Rep1_4_11	448.27	1.61246	1.36534
ARHGAP31	15	20	0.333333	MIA PaCa2	TNF	1	4_11	Rep1_4_11	452.227	1.60493	1.4515
ARHGAP31	16	30	0.5	MIA PaCa2	TNF	1	4_11	Rep1_4_11	454.27	1.6245	1.53321
ARHGAP31	17	40	0.666667	MIA PaCa2	TNF	1	4_11	Rep1_4_11	452.488	1.61583	1.61568
ARHGAP31	18	50	0.833333	MIA PaCa2	TNF	1	4_11	Rep1_4_11	451.667	1.62544	1.61051
ARHGAP31	19	60	1	MIA PaCa2	TNF	1	4_11	Rep1_4_11	447.952	1.61184	1.60643
ARHGAP31	20	70	1.16667	MIA PaCa2	TNF	1	4_11	Rep1_4_11	446.359	1.61473	1.59539
ARHGAP31	21	80	1.33333	MIA PaCa2	TNF	1	4_11	Rep1_4_11	435.929	1.57632	1.58789
ARHGAP31	22	90	1.5	MIA PaCa2	TNF	1	4_11	Rep1_4_11	440.076	1.57634	1.58143
ARHGAP31	23	100	1.66667	MIA PaCa2	TNF	1	4_11	Rep1_4_11	426.671	1.54721	1.57581
ARHGAP31	24	110	1.83333	MIA PaCa2	TNF	1	4_11	Rep1_4_11	433.72	1.56339	1.56682
ARHGAP31	25	120	2	MIA PaCa2	TNF	1	4_11	Rep1_4_11	439.033	1.58017	1.56503
ARHGAP31	26	130	2.16667	MIA PaCa2	TNF	1	4_11	Rep1_4_11	436.142	1.57252	1.56336
ARHGAP31	27	140	2.33333	MIA PaCa2	TNF	1	4_11	Rep1_4_11	430.009	1.55182	1.56754
ARHGAP31	28	150	2.5	MIA PaCa2	TNF	1	4_11	Rep1_4_11	431.367	1.56376	1.56788
ARHGAP31	29	160	2.66667	MIA PaCa2	TNF	1	4_11	Rep1_4_11	432.362	1.56463	1.56002
ARHGAP31	30	170	2.83333	MIA PaCa2	TNF	1	4_11	Rep1_4_11	434.293	1.57646	1.55535
ARHGAP31	31	180	3	MIA PaCa2	TNF	1	4_11	Rep1_4_11	433.386	1.56582	1.55254
ARHGAP31	32	190	3.16667	MIA PaCa2	TNF	1	4_11	Rep1_4_11	422.885	1.52513	1.54785
ARHGAP31	33	200	3.33333	MIA PaCa2	TNF	1	4_11	Rep1_4_11	426.391	1.53985	1.54339
ARHGAP31	34	210	3.5	MIA PaCa2	TNF	1	4_11	Rep1_4_11	425.995	1.53216	1.53553
ARHGAP31	35	220	3.66667	MIA PaCa2	TNF	1	4_11	Rep1_4_11	422.798	1.5309	1.52366
ARHGAP31	36	230	3.83333	MIA PaCa2	TNF	1	4_11	Rep1_4_11	421.792	1.53342	1.51877
ARHGAP31	37	240	4	MIA PaCa2	TNF	1	4_11	Rep1_4_11	416.713	1.52147	1.51083
ARHGAP31	38	250	4.16667	MIA PaCa2	TNF	1	4_11	Rep1_4_11	413.784	1.48272	1.5039
ARHGAP31	39	260	4.33333	MIA PaCa2	TNF	1	4_11	Rep1_4_11	414.002	1.49087	1.49604
ARHGAP31	40	270	4.5	MIA PaCa2	TNF	1	4_11	Rep1_4_11	411.135	1.48428	1.48981
ARHGAP31	41	280	4.66667	MIA PaCa2	TNF	1	4_11	Rep1_4_11	411.52	1.48364	1.48127
ARHGAP31	42	290	4.83333	MIA PaCa2	TNF	1	4_11	Rep1_4_11	406.933	1.47587	1.47904
ARHGAP31	43	300	5	MIA PaCa2	TNF	1	4_11	Rep1_4_11	409.58	1.48982	1.47225
ARHGAP31	44	310	5.16667	MIA PaCa2	TNF	1	4_11	Rep1_4_11	407.139	1.46171	1.46397
ARHGAP31	45	320	5.33333	MIA PaCa2	TNF	1	4_11	Rep1_4_11	403.523	1.46711	1.45693
ARHGAP31	46	330	5.5	MIA PaCa2	TNF	1	4_11	Rep1_4_11	402.901	1.44335	1.45249
ARHGAP31	47	340	5.66667	MIA PaCa2	TNF	1	4_11	Rep1_4_11	395.372	1.42629	1.44462
ARHGAP31	48	350	5.83333	MIA PaCa2	TNF	1	4_11	Rep1_4_11	401.188	1.43438	1.44087
ARHGAP31	49	360	6	MIA PaCa2	TNF	1	4_11	Rep1_4_11	400.496	1.44479	1.43265
ARHGAP31	50	370	6.16667	MIA PaCa2	TNF	1	4_11	Rep1_4_11	401.312	1.43474	1.42714
ARHGAP31	51	380	6.33333	MIA PaCa2	TNF	1	4_11	Rep1_4_11	402.688	1.43541	1.42546
ARHGAP31	52	390	6.5	MIA PaCa2	TNF	1	4_11	Rep1_4_11	399.282	1.40962	1.42069
ARHGAP31	53	400	6.66667	MIA PaCa2	TNF	1	4_11	Rep1_4_11	398.587	1.40474	1.41576
ARHGAP31	54	410	6.83333	MIA PaCa2	TNF	1	4_11	Rep1_4_11	403.469	1.41457	1.41076
ARHGAP31	55	420	7	MIA PaCa2	TNF	1	4_11	Rep1_4_11	394.551	1.40095	1.4073
ARHGAP31	56	430	7.16667	MIA PaCa2	TNF	1	4_11	Rep1_4_11	400.286	1.41033	1.40622
ARHGAP31	57	440	7.33333	MIA PaCa2	TNF	1	4_11	Rep1_4_11	397.454	1.39974	1.40476
ARHGAP31	58	450	7.5	MIA PaCa2	TNF	1	4_11	Rep1_4_11	399.908	1.41112	1.40422
ARHGAP31	59	460	7.66667	MIA PaCa2	TNF	1	4_11	Rep1_4_11	396.627	1.40211	1.40521
ARHGAP31	60	470	7.83333	MIA PaCa2	TNF	1	4_11	Rep1_4_11	396.973	1.39453	1.40465
ARHGAP31	61	480	8	MIA PaCa2	TNF	1	4_11	Rep1_4_11	402.019	1.41078	1.40331
ARHGAP31	62	490	8.16667	MIA PaCa2	TNF	1	4_11	Rep1_4_11	398.709	1.40789	1.40369
ARHGAP31	63	500	8.33333	MIA PaCa2	TNF	1	4_11	Rep1_4_11	400.784	1.40637	1.40231
ARHGAP31	64	510	8.5	MIA PaCa2	TNF	1	4_11	Rep1_4_11	397.306	1.39034	1.40137
ARHGAP31	65	520	8.66667	MIA PaCa2	TNF	1	4_11	Rep1_4_11	403.848	1.41385	1.39775
ARHGAP31	66	530	8.83333	MIA PaCa2	TNF	1	4_11	Rep1_4_11	397.889	1.39239	1.3926
ARHGAP31	67	540	9	MIA PaCa2	TNF	1	4_11	Rep1_4_11	398.27	1.38796	1.38638
ARHGAP31	68	550	9.16667	MIA PaCa2	TNF	1	4_11	Rep1_4_11	396.087	1.38543	1.38493
ARHGAP31	69	560	9.33333	MIA PaCa2	TNF	1	4_11	Rep1_4_11	391.13	1.37185	1.37738
ARHGAP31	70	570	9.5	MIA PaCa2	TNF	1	4_11	Rep1_4_11	389.747	1.36284	1.37627
ARHGAP31	71	580	9.66667	MIA PaCa2	TNF	1	4_11	Rep1_4_11	392.759	1.38017	1.37122
ARHGAP31	72	590	9.83333	MIA PaCa2	TNF	1	4_11	Rep1_4_11	394.682	1.36103	1.36721
ARHGAP31	73	600	10	MIA PaCa2	TNF	1	4_11	Rep1_4_11	400.414	1.38459	1.3605
ARHGAP31	74	610	10.1667	MIA PaCa2	TNF	1	4_11	Rep1_4_11	395.793	1.35262	1.36232
ARHGAP31	75	620	10.3333	MIA PaCa2	TNF	1	4_11	Rep1_4_11	393.594	1.35737	1.35759
ARHGAP31	76	630	10.5	MIA PaCa2	TNF	1	4_11	Rep1_4_11	385.107	1.32487	1.35902
ARHGAP31	77	640	10.6667	MIA PaCa2	TNF	1	4_11	Rep1_4_11	397.329	1.3756	1.35533
ARHGAP31	78	650	10.8333	MIA PaCa2	TNF	1	4_11	Rep1_4_11	390.286	1.34703	1.35303
ARHGAP31	79	660	11	MIA PaCa2	TNF	1	4_11	Rep1_4_11	396.682	1.37105	1.35188
ARHGAP31	80	670	11.1667	MIA PaCa2	TNF	1	4_11	Rep1_4_11	391.929	1.35879	1.35023
ARHGAP31	81	680	11.3333	MIA PaCa2	TNF	1	4_11	Rep1_4_11	387.236	1.33648	1.3448
ARHGAP31	82	690	11.5	MIA PaCa2	TNF	1	4_11	Rep1_4_11	390.943	1.34931	1.34513
ARHGAP31	83	700	11.6667	MIA PaCa2	TNF	1	4_11	Rep1_4_11	379.157	1.31331	1.34097
ARHGAP31	84	710	11.8333	MIA PaCa2	TNF	1	4_11	Rep1_4_11	383.46	1.3376	1.33966
ARHGAP31	85	720	12	MIA PaCa2	TNF	1	4_11	Rep1_4_11	388.82	1.34935	1.33836
ARHGAP31	86	730	12.1667	MIA PaCa2	TNF	1	4_11	Rep1_4_11	390.27	1.34193	1.33705
ARHGAP31	1	-120	-2	MIA PaCa2	Control	1	4_3	Rep1_4_3	329.767	1.0665	1.04534
ARHGAP31	2	-110	-1.83333	MIA PaCa2	Control	1	4_3	Rep1_4_3	310.866	1.03412	1.03897
ARHGAP31	3	-100	-1.66667	MIA PaCa2	Control	1	4_3	Rep1_4_3	302.391	1.00822	1.0326
ARHGAP31	4	-90	-1.5	MIA PaCa2	Control	1	4_3	Rep1_4_3	299.207	1.01961	1.02623
ARHGAP31	5	-80	-1.33333	MIA PaCa2	Control	1	4_3	Rep1_4_3	300.641	1.02066	1.01862
ARHGAP31	6	-70	-1.16667	MIA PaCa2	Control	1	4_3	Rep1_4_3	297.659	1.02654	1.01581
ARHGAP31	7	-60	-1	MIA PaCa2	Control	1	4_3	Rep1_4_3	293.918	1.00796	1.02105
ARHGAP31	8	-50	-0.833333	MIA PaCa2	Control	1	4_3	Rep1_4_3	292.217	1.01323	1.02007
ARHGAP31	9	-40	-0.666667	MIA PaCa2	Control	1	4_3	Rep1_4_3	291.286	1.01448	1.02513
ARHGAP31	10	-30	-0.5	MIA PaCa2	Control	1	4_3	Rep1_4_3	297.566	1.04486	1.02527
ARHGAP31	11	-20	-0.333333	MIA PaCa2	Control	1	4_3	Rep1_4_3	289.798	1.01279	1.02926
ARHGAP31	12	-10	-0.166667	MIA PaCa2	Control	1	4_3	Rep1_4_3	299.609	1.05607	1.03253
ARHGAP31	13	0	0	MIA PaCa2	Control	1	4_3	Rep1_4_3	291.083	1.02751	1.03649
ARHGAP31	14	10	0.166667	MIA PaCa2	Control	1	4_3	Rep1_4_3	287.985	1.0359	1.03416
ARHGAP31	15	20	0.333333	MIA PaCa2	Control	1	4_3	Rep1_4_3	291.947	1.03611	1.03634
ARHGAP31	16	30	0.5	MIA PaCa2	Control	1	4_3	Rep1_4_3	291.433	1.04219	1.03282
ARHGAP31	17	40	0.666667	MIA PaCa2	Control	1	4_3	Rep1_4_3	288.04	1.02859	1.03182
ARHGAP31	18	50	0.833333	MIA PaCa2	Control	1	4_3	Rep1_4_3	285.653	1.02799	1.03185
ARHGAP31	19	60	1	MIA PaCa2	Control	1	4_3	Rep1_4_3	286.645	1.03142	1.02749
ARHGAP31	20	70	1.16667	MIA PaCa2	Control	1	4_3	Rep1_4_3	282.116	1.02057	1.02442
ARHGAP31	21	80	1.33333	MIA PaCa2	Control	1	4_3	Rep1_4_3	286.535	1.03611	1.02359
ARHGAP31	22	90	1.5	MIA PaCa2	Control	1	4_3	Rep1_4_3	280.723	1.00554	1.02188
ARHGAP31	23	100	1.66667	MIA PaCa2	Control	1	4_3	Rep1_4_3	281.49	1.02075	1.01945
ARHGAP31	24	110	1.83333	MIA PaCa2	Control	1	4_3	Rep1_4_3	283.739	1.02276	1.02031
ARHGAP31	25	120	2	MIA PaCa2	Control	1	4_3	Rep1_4_3	282.291	1.01603	1.02
ARHGAP31	26	130	2.16667	MIA PaCa2	Control	1	4_3	Rep1_4_3	281.34	1.01438	1.02364
ARHGAP31	27	140	2.33333	MIA PaCa2	Control	1	4_3	Rep1_4_3	284.476	1.02662	1.02771
ARHGAP31	28	150	2.5	MIA PaCa2	Control	1	4_3	Rep1_4_3	285.202	1.03389	1.02774
ARHGAP31	29	160	2.66667	MIA PaCa2	Control	1	4_3	Rep1_4_3	284.915	1.03105	1.02795
ARHGAP31	30	170	2.83333	MIA PaCa2	Control	1	4_3	Rep1_4_3	289.05	1.04923	1.02788
ARHGAP31	31	180	3	MIA PaCa2	Control	1	4_3	Rep1_4_3	283.142	1.02299	1.0266
ARHGAP31	32	190	3.16667	MIA PaCa2	Control	1	4_3	Rep1_4_3	282.127	1.01748	1.02606
ARHGAP31	33	200	3.33333	MIA PaCa2	Control	1	4_3	Rep1_4_3	280.749	1.01388	1.02545
ARHGAP31	34	210	3.5	MIA PaCa2	Control	1	4_3	Rep1_4_3	282.956	1.0177	1.02482
ARHGAP31	35	220	3.66667	MIA PaCa2	Control	1	4_3	Rep1_4_3	284.479	1.03007	1.02502
ARHGAP31	36	230	3.83333	MIA PaCa2	Control	1	4_3	Rep1_4_3	282.44	1.02681	1.02603
ARHGAP31	37	240	4	MIA PaCa2	Control	1	4_3	Rep1_4_3	286.163	1.04482	1.0267
ARHGAP31	38	250	4.16667	MIA PaCa2	Control	1	4_3	Rep1_4_3	285.868	1.02436	1.02846
ARHGAP31	39	260	4.33333	MIA PaCa2	Control	1	4_3	Rep1_4_3	284.521	1.02459	1.02883
ARHGAP31	40	270	4.5	MIA PaCa2	Control	1	4_3	Rep1_4_3	282.134	1.01856	1.03082
ARHGAP31	41	280	4.66667	MIA PaCa2	Control	1	4_3	Rep1_4_3	285.7	1.03002	1.02864
ARHGAP31	42	290	4.83333	MIA PaCa2	Control	1	4_3	Rep1_4_3	284.726	1.03265	1.02834
ARHGAP31	43	300	5	MIA PaCa2	Control	1	4_3	Rep1_4_3	286.111	1.04071	1.02703
ARHGAP31	44	310	5.16667	MIA PaCa2	Control	1	4_3	Rep1_4_3	286.783	1.0296	1.02556
ARHGAP31	45	320	5.33333	MIA PaCa2	Control	1	4_3	Rep1_4_3	281.157	1.02222	1.02335
ARHGAP31	46	330	5.5	MIA PaCa2	Control	1	4_3	Rep1_4_3	283.453	1.01544	1.02063
ARHGAP31	47	340	5.66667	MIA PaCa2	Control	1	4_3	Rep1_4_3	279.497	1.00827	1.0164
ARHGAP31	48	350	5.83333	MIA PaCa2	Control	1	4_3	Rep1_4_3	283.773	1.01458	1.01349
ARHGAP31	49	360	6	MIA PaCa2	Control	1	4_3	Rep1_4_3	280.967	1.01359	1.01302
ARHGAP31	50	370	6.16667	MIA PaCa2	Control	1	4_3	Rep1_4_3	282.815	1.0111	1.01071
ARHGAP31	51	380	6.33333	MIA PaCa2	Control	1	4_3	Rep1_4_3	283.13	1.00924	1.00974
ARHGAP31	52	390	6.5	MIA PaCa2	Control	1	4_3	Rep1_4_3	288.606	1.01889	1.01118
ARHGAP31	53	400	6.66667	MIA PaCa2	Control	1	4_3	Rep1_4_3	283.539	0.999275	1.01102
ARHGAP31	54	410	6.83333	MIA PaCa2	Control	1	4_3	Rep1_4_3	285.647	1.00148	1.00845
ARHGAP31	55	420	7	MIA PaCa2	Control	1	4_3	Rep1_4_3	288.58	1.02467	1.00592
ARHGAP31	56	430	7.16667	MIA PaCa2	Control	1	4_3	Rep1_4_3	287.36	1.01245	1.00283
ARHGAP31	57	440	7.33333	MIA PaCa2	Control	1	4_3	Rep1_4_3	282.002	0.993149	1.00422
ARHGAP31	58	450	7.5	MIA PaCa2	Control	1	4_3	Rep1_4_3	280.998	0.991531	1.00527
ARHGAP31	59	460	7.66667	MIA PaCa2	Control	1	4_3	Rep1_4_3	282.1	0.997247	1.00297
ARHGAP31	60	470	7.83333	MIA PaCa2	Control	1	4_3	Rep1_4_3	287.222	1.00898	1.00297
ARHGAP31	61	480	8	MIA PaCa2	Control	1	4_3	Rep1_4_3	287.475	1.00882	1.00448
ARHGAP31	62	490	8.16667	MIA PaCa2	Control	1	4_3	Rep1_4_3	285.64	1.00863	1.007
ARHGAP31	63	500	8.33333	MIA PaCa2	Control	1	4_3	Rep1_4_3	288.52	1.01243	1.01034
ARHGAP31	64	510	8.5	MIA PaCa2	Control	1	4_3	Rep1_4_3	286.828	1.00373	1.01247
ARHGAP31	65	520	8.66667	MIA PaCa2	Control	1	4_3	Rep1_4_3	288.26	1.00918	1.01145
ARHGAP31	66	530	8.83333	MIA PaCa2	Control	1	4_3	Rep1_4_3	291.659	1.02064	1.01257
ARHGAP31	67	540	9	MIA PaCa2	Control	1	4_3	Rep1_4_3	293.798	1.02387	1.01313
ARHGAP31	68	550	9.16667	MIA PaCa2	Control	1	4_3	Rep1_4_3	286.365	1.00165	1.01679
ARHGAP31	69	560	9.33333	MIA PaCa2	Control	1	4_3	Rep1_4_3	289.807	1.01647	1.0147
ARHGAP31	70	570	9.5	MIA PaCa2	Control	1	4_3	Rep1_4_3	290.666	1.01638	1.0118
ARHGAP31	71	580	9.66667	MIA PaCa2	Control	1	4_3	Rep1_4_3	292.918	1.02933	1.00876
ARHGAP31	72	590	9.83333	MIA PaCa2	Control	1	4_3	Rep1_4_3	288.399	0.994526	1.00793
ARHGAP31	73	600	10	MIA PaCa2	Control	1	4_3	Rep1_4_3	289.306	1.00039	1.00598
ARHGAP31	74	610	10.1667	MIA PaCa2	Control	1	4_3	Rep1_4_3	293.373	1.0026	1.00755
ARHGAP31	75	620	10.3333	MIA PaCa2	Control	1	4_3	Rep1_4_3	288.763	0.995845	1.00566
ARHGAP31	76	630	10.5	MIA PaCa2	Control	1	4_3	Rep1_4_3	291.478	1.00276	1.00811
ARHGAP31	77	640	10.6667	MIA PaCa2	Control	1	4_3	Rep1_4_3	296.759	1.02742	1.01007
ARHGAP31	78	650	10.8333	MIA PaCa2	Control	1	4_3	Rep1_4_3	294.404	1.0161	1.01081
ARHGAP31	79	660	11	MIA PaCa2	Control	1	4_3	Rep1_4_3	292.705	1.01168	1.00901
ARHGAP31	80	670	11.1667	MIA PaCa2	Control	1	4_3	Rep1_4_3	292.497	1.01407	1.00885
ARHGAP31	81	680	11.3333	MIA PaCa2	Control	1	4_3	Rep1_4_3	291.998	1.00778	1.0095
ARHGAP31	82	690	11.5	MIA PaCa2	Control	1	4_3	Rep1_4_3	284.881	0.983246	1.01175
ARHGAP31	83	700	11.6667	MIA PaCa2	Control	1	4_3	Rep1_4_3	289.184	1.00167	1.01392
ARHGAP31	84	710	11.8333	MIA PaCa2	Control	1	4_3	Rep1_4_3	295.831	1.03193	1.01875
ARHGAP31	85	720	12	MIA PaCa2	Control	1	4_3	Rep1_4_3	297.331	1.03185	1.02358
ARHGAP31	86	730	12.1667	MIA PaCa2	Control	1	4_3	Rep1_4_3	298.647	1.02689	1.02841
ARHGAP31	1	-120	-2	MIA PaCa2	Control	1	4_4	Rep1_4_4	341.802	1.10542	1.11082
ARHGAP31	2	-110	-1.83333	MIA PaCa2	Control	1	4_4	Rep1_4_4	331.436	1.10255	1.10802
ARHGAP31	3	-100	-1.66667	MIA PaCa2	Control	1	4_4	Rep1_4_4	329.411	1.09831	1.10522
ARHGAP31	4	-90	-1.5	MIA PaCa2	Control	1	4_4	Rep1_4_4	331.314	1.12902	1.10241
ARHGAP31	5	-80	-1.33333	MIA PaCa2	Control	1	4_4	Rep1_4_4	324.676	1.10226	1.09632
ARHGAP31	6	-70	-1.16667	MIA PaCa2	Control	1	4_4	Rep1_4_4	318.694	1.09908	1.09301
ARHGAP31	7	-60	-1	MIA PaCa2	Control	1	4_4	Rep1_4_4	315.002	1.08026	1.09148
ARHGAP31	8	-50	-0.833333	MIA PaCa2	Control	1	4_4	Rep1_4_4	306.508	1.06278	1.08662
ARHGAP31	9	-40	-0.666667	MIA PaCa2	Control	1	4_4	Rep1_4_4	309.915	1.07937	1.08546
ARHGAP31	10	-30	-0.5	MIA PaCa2	Control	1	4_4	Rep1_4_4	309.737	1.08759	1.08672
ARHGAP31	11	-20	-0.333333	MIA PaCa2	Control	1	4_4	Rep1_4_4	313.314	1.09497	1.08671
ARHGAP31	12	-10	-0.166667	MIA PaCa2	Control	1	4_4	Rep1_4_4	310.423	1.09419	1.08781
ARHGAP31	13	0	0	MIA PaCa2	Control	1	4_4	Rep1_4_4	313.851	1.10788	1.09119
ARHGAP31	14	10	0.166667	MIA PaCa2	Control	1	4_4	Rep1_4_4	300.302	1.08021	1.0911
ARHGAP31	15	20	0.333333	MIA PaCa2	Control	1	4_4	Rep1_4_4	301.636	1.07049	1.09179
ARHGAP31	16	30	0.5	MIA PaCa2	Control	1	4_4	Rep1_4_4	308.447	1.10303	1.09192
ARHGAP31	17	40	0.666667	MIA PaCa2	Control	1	4_4	Rep1_4_4	304.385	1.08696	1.08901
ARHGAP31	18	50	0.833333	MIA PaCa2	Control	1	4_4	Rep1_4_4	305.598	1.09977	1.08785
ARHGAP31	19	60	1	MIA PaCa2	Control	1	4_4	Rep1_4_4	304.347	1.09512	1.08824
ARHGAP31	20	70	1.16667	MIA PaCa2	Control	1	4_4	Rep1_4_4	300.625	1.08753	1.08686
ARHGAP31	21	80	1.33333	MIA PaCa2	Control	1	4_4	Rep1_4_4	296.472	1.07204	1.08796
ARHGAP31	22	90	1.5	MIA PaCa2	Control	1	4_4	Rep1_4_4	299.619	1.07323	1.08546
ARHGAP31	23	100	1.66667	MIA PaCa2	Control	1	4_4	Rep1_4_4	301.518	1.09337	1.08296
ARHGAP31	24	110	1.83333	MIA PaCa2	Control	1	4_4	Rep1_4_4	303.687	1.09467	1.08087
ARHGAP31	25	120	2	MIA PaCa2	Control	1	4_4	Rep1_4_4	300.687	1.08224	1.08611
ARHGAP31	26	130	2.16667	MIA PaCa2	Control	1	4_4	Rep1_4_4	298.876	1.0776	1.08905
ARHGAP31	27	140	2.33333	MIA PaCa2	Control	1	4_4	Rep1_4_4	297.299	1.0729	1.09035
ARHGAP31	28	150	2.5	MIA PaCa2	Control	1	4_4	Rep1_4_4	305.849	1.10874	1.08638
ARHGAP31	29	160	2.66667	MIA PaCa2	Control	1	4_4	Rep1_4_4	302.269	1.09385	1.08705
ARHGAP31	30	170	2.83333	MIA PaCa2	Control	1	4_4	Rep1_4_4	303.702	1.10242	1.08683
ARHGAP31	31	180	3	MIA PaCa2	Control	1	4_4	Rep1_4_4	295.291	1.06688	1.08919
ARHGAP31	32	190	3.16667	MIA PaCa2	Control	1	4_4	Rep1_4_4	301.392	1.08696	1.08886
ARHGAP31	33	200	3.33333	MIA PaCa2	Control	1	4_4	Rep1_4_4	297.956	1.07602	1.08994
ARHGAP31	34	210	3.5	MIA PaCa2	Control	1	4_4	Rep1_4_4	302.905	1.08944	1.08651
ARHGAP31	35	220	3.66667	MIA PaCa2	Control	1	4_4	Rep1_4_4	305.564	1.10641	1.0836
ARHGAP31	36	230	3.83333	MIA PaCa2	Control	1	4_4	Rep1_4_4	302.972	1.10145	1.07836
ARHGAP31	37	240	4	MIA PaCa2	Control	1	4_4	Rep1_4_4	295.35	1.07836	1.07253
ARHGAP31	38	250	4.16667	MIA PaCa2	Control	1	4_4	Rep1_4_4	292.061	1.04655	1.0727
ARHGAP31	39	260	4.33333	MIA PaCa2	Control	1	4_4	Rep1_4_4	291.644	1.05024	1.06817
ARHGAP31	40	270	4.5	MIA PaCa2	Control	1	4_4	Rep1_4_4	286.751	1.03523	1.06312
ARHGAP31	41	280	4.66667	MIA PaCa2	Control	1	4_4	Rep1_4_4	302.518	1.09066	1.059
ARHGAP31	42	290	4.83333	MIA PaCa2	Control	1	4_4	Rep1_4_4	296.323	1.07471	1.06783
ARHGAP31	43	300	5	MIA PaCa2	Control	1	4_4	Rep1_4_4	293.094	1.06611	1.07352
ARHGAP31	44	310	5.16667	MIA PaCa2	Control	1	4_4	Rep1_4_4	292.325	1.0495	1.08074
ARHGAP31	45	320	5.33333	MIA PaCa2	Control	1	4_4	Rep1_4_4	304.843	1.10834	1.07462
ARHGAP31	46	330	5.5	MIA PaCa2	Control	1	4_4	Rep1_4_4	304.294	1.0901	1.07757
ARHGAP31	47	340	5.66667	MIA PaCa2	Control	1	4_4	Rep1_4_4	300.972	1.08574	1.07947
ARHGAP31	48	350	5.83333	MIA PaCa2	Control	1	4_4	Rep1_4_4	293.075	1.04784	1.08352
ARHGAP31	49	360	6	MIA PaCa2	Control	1	4_4	Rep1_4_4	303.628	1.09534	1.07986
ARHGAP31	50	370	6.16667	MIA PaCa2	Control	1	4_4	Rep1_4_4	301.923	1.07941	1.07936
ARHGAP31	51	380	6.33333	MIA PaCa2	Control	1	4_4	Rep1_4_4	302.381	1.07786	1.07741
ARHGAP31	52	390	6.5	MIA PaCa2	Control	1	4_4	Rep1_4_4	306.682	1.08271	1.08292
ARHGAP31	53	400	6.66667	MIA PaCa2	Control	1	4_4	Rep1_4_4	308.319	1.08661	1.07983
ARHGAP31	54	410	6.83333	MIA PaCa2	Control	1	4_4	Rep1_4_4	305.79	1.0721	1.08048
ARHGAP31	55	420	7	MIA PaCa2	Control	1	4_4	Rep1_4_4	305.973	1.08643	1.08315
ARHGAP31	56	430	7.16667	MIA PaCa2	Control	1	4_4	Rep1_4_4	304.738	1.07368	1.0849
ARHGAP31	57	440	7.33333	MIA PaCa2	Control	1	4_4	Rep1_4_4	307.79	1.08397	1.08835
ARHGAP31	58	450	7.5	MIA PaCa2	Control	1	4_4	Rep1_4_4	310.76	1.09655	1.09139
ARHGAP31	59	460	7.66667	MIA PaCa2	Control	1	4_4	Rep1_4_4	309.732	1.09493	1.09231
ARHGAP31	60	470	7.83333	MIA PaCa2	Control	1	4_4	Rep1_4_4	316.198	1.11077	1.09291
ARHGAP31	61	480	8	MIA PaCa2	Control	1	4_4	Rep1_4_4	311.584	1.09342	1.0942
ARHGAP31	62	490	8.16667	MIA PaCa2	Control	1	4_4	Rep1_4_4	309.483	1.09282	1.09174
ARHGAP31	63	500	8.33333	MIA PaCa2	Control	1	4_4	Rep1_4_4	307.185	1.07793	1.09048
ARHGAP31	64	510	8.5	MIA PaCa2	Control	1	4_4	Rep1_4_4	312.335	1.09299	1.08665
ARHGAP31	65	520	8.66667	MIA PaCa2	Control	1	4_4	Rep1_4_4	308.3	1.07934	1.08397
ARHGAP31	66	530	8.83333	MIA PaCa2	Control	1	4_4	Rep1_4_4	310.354	1.08607	1.08521
ARHGAP31	67	540	9	MIA PaCa2	Control	1	4_4	Rep1_4_4	311.038	1.08396	1.08542
ARHGAP31	68	550	9.16667	MIA PaCa2	Control	1	4_4	Rep1_4_4	307.251	1.0747	1.08583
ARHGAP31	69	560	9.33333	MIA PaCa2	Control	1	4_4	Rep1_4_4	314.038	1.10146	1.08629
ARHGAP31	70	570	9.5	MIA PaCa2	Control	1	4_4	Rep1_4_4	308.704	1.07946	1.08511
ARHGAP31	71	580	9.66667	MIA PaCa2	Control	1	4_4	Rep1_4_4	311.838	1.09581	1.08198
ARHGAP31	72	590	9.83333	MIA PaCa2	Control	1	4_4	Rep1_4_4	313.94	1.0826	1.08425
ARHGAP31	73	600	10	MIA PaCa2	Control	1	4_4	Rep1_4_4	311.694	1.0778	1.07933
ARHGAP31	74	610	10.1667	MIA PaCa2	Control	1	4_4	Rep1_4_4	310.768	1.06205	1.07757
ARHGAP31	75	620	10.3333	MIA PaCa2	Control	1	4_4	Rep1_4_4	316.239	1.0906	1.07477
ARHGAP31	76	630	10.5	MIA PaCa2	Control	1	4_4	Rep1_4_4	310.152	1.067	1.07672
ARHGAP31	77	640	10.6667	MIA PaCa2	Control	1	4_4	Rep1_4_4	308.229	1.06713	1.07398
ARHGAP31	78	650	10.8333	MIA PaCa2	Control	1	4_4	Rep1_4_4	311.809	1.07618	1.07369
ARHGAP31	79	660	11	MIA PaCa2	Control	1	4_4	Rep1_4_4	317.176	1.09626	1.0721
ARHGAP31	80	670	11.1667	MIA PaCa2	Control	1	4_4	Rep1_4_4	305.349	1.05863	1.07157
ARHGAP31	81	680	11.3333	MIA PaCa2	Control	1	4_4	Rep1_4_4	307.129	1.06001	1.07655
ARHGAP31	82	690	11.5	MIA PaCa2	Control	1	4_4	Rep1_4_4	312.773	1.07951	1.07724
ARHGAP31	83	700	11.6667	MIA PaCa2	Control	1	4_4	Rep1_4_4	306.981	1.06331	1.07252
ARHGAP31	84	710	11.8333	MIA PaCa2	Control	1	4_4	Rep1_4_4	315.91	1.10197	1.07531
ARHGAP31	85	720	12	MIA PaCa2	Control	1	4_4	Rep1_4_4	311.503	1.08103	1.0781
ARHGAP31	86	730	12.1667	MIA PaCa2	Control	1	4_4	Rep1_4_4	309.199	1.06317	1.08089
ARHGAP31	1	-120	-2	MIA PaCa2	Control	1	4_5	Rep1_4_5	302.521	0.978381	0.999926
ARHGAP31	2	-110	-1.83333	MIA PaCa2	Control	1	4_5	Rep1_4_5	302.656	1.00681	1.00269
ARHGAP31	3	-100	-1.66667	MIA PaCa2	Control	1	4_5	Rep1_4_5	307.231	1.02436	1.00546
ARHGAP31	4	-90	-1.5	MIA PaCa2	Control	1	4_5	Rep1_4_5	298.407	1.01688	1.00822
ARHGAP31	5	-80	-1.33333	MIA PaCa2	Control	1	4_5	Rep1_4_5	297.335	1.00944	1.01163
ARHGAP31	6	-70	-1.16667	MIA PaCa2	Control	1	4_5	Rep1_4_5	296.902	1.02393	1.0126
ARHGAP31	7	-60	-1	MIA PaCa2	Control	1	4_5	Rep1_4_5	290.939	0.997742	1.00904
ARHGAP31	8	-50	-0.833333	MIA PaCa2	Control	1	4_5	Rep1_4_5	289.058	1.00228	1.00904
ARHGAP31	9	-40	-0.666667	MIA PaCa2	Control	1	4_5	Rep1_4_5	291.027	1.01358	1.0104
ARHGAP31	10	-30	-0.5	MIA PaCa2	Control	1	4_5	Rep1_4_5	284.637	0.999459	1.00937
ARHGAP31	11	-20	-0.333333	MIA PaCa2	Control	1	4_5	Rep1_4_5	290.952	1.01682	1.01184
ARHGAP31	12	-10	-0.166667	MIA PaCa2	Control	1	4_5	Rep1_4_5	289.092	1.019	1.01488
ARHGAP31	13	0	0	MIA PaCa2	Control	1	4_5	Rep1_4_5	288.022	1.0167	1.01614
ARHGAP31	14	10	0.166667	MIA PaCa2	Control	1	4_5	Rep1_4_5	282.18	1.01502	1.01602
ARHGAP31	15	20	0.333333	MIA PaCa2	Control	1	4_5	Rep1_4_5	288.42	1.02359	1.01678
ARHGAP31	16	30	0.5	MIA PaCa2	Control	1	4_5	Rep1_4_5	285.903	1.02241	1.01697
ARHGAP31	17	40	0.666667	MIA PaCa2	Control	1	4_5	Rep1_4_5	279.645	0.998611	1.01832
ARHGAP31	18	50	0.833333	MIA PaCa2	Control	1	4_5	Rep1_4_5	284.017	1.0221	1.02001
ARHGAP31	19	60	1	MIA PaCa2	Control	1	4_5	Rep1_4_5	283.57	1.02035	1.01945
ARHGAP31	20	70	1.16667	MIA PaCa2	Control	1	4_5	Rep1_4_5	283.659	1.02615	1.02012
ARHGAP31	21	80	1.33333	MIA PaCa2	Control	1	4_5	Rep1_4_5	283.983	1.02688	1.02091
ARHGAP31	22	90	1.5	MIA PaCa2	Control	1	4_5	Rep1_4_5	284.655	1.01963	1.02098
ARHGAP31	23	100	1.66667	MIA PaCa2	Control	1	4_5	Rep1_4_5	283.25	1.02713	1.02084
ARHGAP31	24	110	1.83333	MIA PaCa2	Control	1	4_5	Rep1_4_5	278.566	1.00412	1.01738
ARHGAP31	25	120	2	MIA PaCa2	Control	1	4_5	Rep1_4_5	284.122	1.02262	1.01674
ARHGAP31	26	130	2.16667	MIA PaCa2	Control	1	4_5	Rep1_4_5	282.718	1.01935	1.01724
ARHGAP31	27	140	2.33333	MIA PaCa2	Control	1	4_5	Rep1_4_5	277.629	1.00191	1.01704
ARHGAP31	28	150	2.5	MIA PaCa2	Control	1	4_5	Rep1_4_5	282.044	1.02245	1.01918
ARHGAP31	29	160	2.66667	MIA PaCa2	Control	1	4_5	Rep1_4_5	282.729	1.02314	1.01957
ARHGAP31	30	170	2.83333	MIA PaCa2	Control	1	4_5	Rep1_4_5	282.56	1.02568	1.02212
ARHGAP31	31	180	3	MIA PaCa2	Control	1	4_5	Rep1_4_5	282.07	1.01912	1.02599
ARHGAP31	32	190	3.16667	MIA PaCa2	Control	1	4_5	Rep1_4_5	284.306	1.02534	1.02704
ARHGAP31	33	200	3.33333	MIA PaCa2	Control	1	4_5	Rep1_4_5	287.202	1.03719	1.03017
ARHGAP31	34	210	3.5	MIA PaCa2	Control	1	4_5	Rep1_4_5	286.11	1.02904	1.03115
ARHGAP31	35	220	3.66667	MIA PaCa2	Control	1	4_5	Rep1_4_5	284.406	1.0298	1.03001
ARHGAP31	36	230	3.83333	MIA PaCa2	Control	1	4_5	Rep1_4_5	287.46	1.04506	1.03123
ARHGAP31	37	240	4	MIA PaCa2	Control	1	4_5	Rep1_4_5	282.799	1.03253	1.02816
ARHGAP31	38	250	4.16667	MIA PaCa2	Control	1	4_5	Rep1_4_5	282.165	1.01109	1.02555
ARHGAP31	39	260	4.33333	MIA PaCa2	Control	1	4_5	Rep1_4_5	287.099	1.03388	1.02694
ARHGAP31	40	270	4.5	MIA PaCa2	Control	1	4_5	Rep1_4_5	281.353	1.01574	1.02458
ARHGAP31	41	280	4.66667	MIA PaCa2	Control	1	4_5	Rep1_4_5	280.346	1.01072	1.0225
ARHGAP31	42	290	4.83333	MIA PaCa2	Control	1	4_5	Rep1_4_5	286.622	1.03953	1.02408
ARHGAP31	43	300	5	MIA PaCa2	Control	1	4_5	Rep1_4_5	282.773	1.02857	1.0231
ARHGAP31	44	310	5.16667	MIA PaCa2	Control	1	4_5	Rep1_4_5	283.533	1.01794	1.02398
ARHGAP31	45	320	5.33333	MIA PaCa2	Control	1	4_5	Rep1_4_5	281.141	1.02216	1.02722
ARHGAP31	46	330	5.5	MIA PaCa2	Control	1	4_5	Rep1_4_5	286.682	1.02701	1.02794
ARHGAP31	47	340	5.66667	MIA PaCa2	Control	1	4_5	Rep1_4_5	283.275	1.0219	1.0279
ARHGAP31	48	350	5.83333	MIA PaCa2	Control	1	4_5	Rep1_4_5	289.049	1.03345	1.02808
ARHGAP31	49	360	6	MIA PaCa2	Control	1	4_5	Rep1_4_5	289.554	1.04457	1.0286
ARHGAP31	50	370	6.16667	MIA PaCa2	Control	1	4_5	Rep1_4_5	287.617	1.02826	1.0282
ARHGAP31	51	380	6.33333	MIA PaCa2	Control	1	4_5	Rep1_4_5	285.923	1.01919	1.02625
ARHGAP31	52	390	6.5	MIA PaCa2	Control	1	4_5	Rep1_4_5	290.577	1.02585	1.02264
ARHGAP31	53	400	6.66667	MIA PaCa2	Control	1	4_5	Rep1_4_5	290.605	1.02418	1.01911
ARHGAP31	54	410	6.83333	MIA PaCa2	Control	1	4_5	Rep1_4_5	287.581	1.00826	1.01859
ARHGAP31	55	420	7	MIA PaCa2	Control	1	4_5	Rep1_4_5	283.923	1.00814	1.02083
ARHGAP31	56	430	7.16667	MIA PaCa2	Control	1	4_5	Rep1_4_5	289.471	1.01989	1.01978
ARHGAP31	57	440	7.33333	MIA PaCa2	Control	1	4_5	Rep1_4_5	290.931	1.02459	1.01847
ARHGAP31	58	450	7.5	MIA PaCa2	Control	1	4_5	Rep1_4_5	293.29	1.03491	1.0192
ARHGAP31	59	460	7.66667	MIA PaCa2	Control	1	4_5	Rep1_4_5	288.115	1.01851	1.02208
ARHGAP31	60	470	7.83333	MIA PaCa2	Control	1	4_5	Rep1_4_5	288.94	1.01502	1.02332
ARHGAP31	61	480	8	MIA PaCa2	Control	1	4_5	Rep1_4_5	288.763	1.01334	1.0194
ARHGAP31	62	490	8.16667	MIA PaCa2	Control	1	4_5	Rep1_4_5	291.205	1.02828	1.01767
ARHGAP31	63	500	8.33333	MIA PaCa2	Control	1	4_5	Rep1_4_5	293.129	1.0286	1.01706
ARHGAP31	64	510	8.5	MIA PaCa2	Control	1	4_5	Rep1_4_5	284.94	0.997124	1.01749
ARHGAP31	65	520	8.66667	MIA PaCa2	Control	1	4_5	Rep1_4_5	292.148	1.02279	1.01852
ARHGAP31	66	530	8.83333	MIA PaCa2	Control	1	4_5	Rep1_4_5	289.845	1.01429	1.01668
ARHGAP31	67	540	9	MIA PaCa2	Control	1	4_5	Rep1_4_5	292.104	1.01797	1.01494
ARHGAP31	68	550	9.16667	MIA PaCa2	Control	1	4_5	Rep1_4_5	291.768	1.02054	1.01771
ARHGAP31	69	560	9.33333	MIA PaCa2	Control	1	4_5	Rep1_4_5	289.516	1.01545	1.01512
ARHGAP31	70	570	9.5	MIA PaCa2	Control	1	4_5	Rep1_4_5	290.676	1.01642	1.01362
ARHGAP31	71	580	9.66667	MIA PaCa2	Control	1	4_5	Rep1_4_5	289.271	1.01651	1.01142
ARHGAP31	72	590	9.83333	MIA PaCa2	Control	1	4_5	Rep1_4_5	291.325	1.00462	1.00949
ARHGAP31	73	600	10	MIA PaCa2	Control	1	4_5	Rep1_4_5	290.309	1.00386	1.00832
ARHGAP31	74	610	10.1667	MIA PaCa2	Control	1	4_5	Rep1_4_5	293.357	1.00255	1.00931
ARHGAP31	75	620	10.3333	MIA PaCa2	Control	1	4_5	Rep1_4_5	292.005	1.00702	1.00795
ARHGAP31	76	630	10.5	MIA PaCa2	Control	1	4_5	Rep1_4_5	292.779	1.00724	1.01073
ARHGAP31	77	640	10.6667	MIA PaCa2	Control	1	4_5	Rep1_4_5	295.593	1.02338	1.01306
ARHGAP31	78	650	10.8333	MIA PaCa2	Control	1	4_5	Rep1_4_5	291.756	1.00697	1.01225
ARHGAP31	79	660	11	MIA PaCa2	Control	1	4_5	Rep1_4_5	296.291	1.02407	1.01393
ARHGAP31	80	670	11.1667	MIA PaCa2	Control	1	4_5	Rep1_4_5	294.254	1.02016	1.01683
ARHGAP31	81	680	11.3333	MIA PaCa2	Control	1	4_5	Rep1_4_5	288.847	0.996909	1.01553
ARHGAP31	82	690	11.5	MIA PaCa2	Control	1	4_5	Rep1_4_5	295.176	1.01878	1.01711
ARHGAP31	83	700	11.6667	MIA PaCa2	Control	1	4_5	Rep1_4_5	296.649	1.02752	1.01487
ARHGAP31	84	710	11.8333	MIA PaCa2	Control	1	4_5	Rep1_4_5	290.778	1.0143	1.01496
ARHGAP31	85	720	12	MIA PaCa2	Control	1	4_5	Rep1_4_5	293.349	1.01803	1.01504
ARHGAP31	86	730	12.1667	MIA PaCa2	Control	1	4_5	Rep1_4_5	293.264	1.00838	1.01513
ARHGAP31	1	-120	-2	MIA PaCa2	TNF	1	4_9	Rep1_4_9	312.88	1.01188	1.00752
ARHGAP31	2	-110	-1.83333	MIA PaCa2	TNF	1	4_9	Rep1_4_9	298.262	0.992194	1.00087
ARHGAP31	3	-100	-1.66667	MIA PaCa2	TNF	1	4_9	Rep1_4_9	294.739	0.982708	0.994214
ARHGAP31	4	-90	-1.5	MIA PaCa2	TNF	1	4_9	Rep1_4_9	297.31	1.01314	0.987562
ARHGAP31	5	-80	-1.33333	MIA PaCa2	TNF	1	4_9	Rep1_4_9	288.373	0.979013	0.986592
ARHGAP31	6	-70	-1.16667	MIA PaCa2	TNF	1	4_9	Rep1_4_9	279.675	0.964518	0.988
ARHGAP31	7	-60	-1	MIA PaCa2	TNF	1	4_9	Rep1_4_9	282.697	0.969477	0.995288
ARHGAP31	8	-50	-0.833333	MIA PaCa2	TNF	1	4_9	Rep1_4_9	289.871	1.0051	0.993312
ARHGAP31	9	-40	-0.666667	MIA PaCa2	TNF	1	4_9	Rep1_4_9	287.715	1.00205	0.996251
ARHGAP31	10	-30	-0.5	MIA PaCa2	TNF	1	4_9	Rep1_4_9	294.396	1.03372	1.00106
ARHGAP31	11	-20	-0.333333	MIA PaCa2	TNF	1	4_9	Rep1_4_9	285.94	0.999304	1.08449
ARHGAP31	12	-10	-0.166667	MIA PaCa2	TNF	1	4_9	Rep1_4_9	283.585	0.999591	1.16802
ARHGAP31	13	0	0	MIA PaCa2	TNF	1	4_9	Rep1_4_9	282.772	0.99817	1.25203
ARHGAP31	14	10	0.166667	MIA PaCa2	TNF	1	4_9	Rep1_4_9	431.875	1.55349	1.32998
ARHGAP31	15	20	0.333333	MIA PaCa2	TNF	1	4_9	Rep1_4_9	447.962	1.5898	1.41293
ARHGAP31	16	30	0.5	MIA PaCa2	TNF	1	4_9	Rep1_4_9	444.654	1.59012	1.49671
ARHGAP31	17	40	0.666667	MIA PaCa2	TNF	1	4_9	Rep1_4_9	442.287	1.57941	1.58168
ARHGAP31	18	50	0.833333	MIA PaCa2	TNF	1	4_9	Rep1_4_9	439.019	1.57992	1.58715
ARHGAP31	19	60	1	MIA PaCa2	TNF	1	4_9	Rep1_4_9	440.792	1.58608	1.58393
ARHGAP31	20	70	1.16667	MIA PaCa2	TNF	1	4_9	Rep1_4_9	440.336	1.59294	1.58265
ARHGAP31	21	80	1.33333	MIA PaCa2	TNF	1	4_9	Rep1_4_9	440.207	1.59179	1.58073
ARHGAP31	22	90	1.5	MIA PaCa2	TNF	1	4_9	Rep1_4_9	437.546	1.56728	1.57894
ARHGAP31	23	100	1.66667	MIA PaCa2	TNF	1	4_9	Rep1_4_9	436.033	1.58116	1.57403
ARHGAP31	24	110	1.83333	MIA PaCa2	TNF	1	4_9	Rep1_4_9	434.438	1.56597	1.56844
ARHGAP31	25	120	2	MIA PaCa2	TNF	1	4_9	Rep1_4_9	435.476	1.56737	1.56444
ARHGAP31	26	130	2.16667	MIA PaCa2	TNF	1	4_9	Rep1_4_9	430.376	1.55173	1.56384
ARHGAP31	27	140	2.33333	MIA PaCa2	TNF	1	4_9	Rep1_4_9	430.543	1.55375	1.55737
ARHGAP31	28	150	2.5	MIA PaCa2	TNF	1	4_9	Rep1_4_9	431.374	1.56379	1.54777
ARHGAP31	29	160	2.66667	MIA PaCa2	TNF	1	4_9	Rep1_4_9	431.945	1.56312	1.54142
ARHGAP31	30	170	2.83333	MIA PaCa2	TNF	1	4_9	Rep1_4_9	423.105	1.53585	1.5345
ARHGAP31	31	180	3	MIA PaCa2	TNF	1	4_9	Rep1_4_9	414.843	1.49882	1.52725
ARHGAP31	32	190	3.16667	MIA PaCa2	TNF	1	4_9	Rep1_4_9	422.271	1.52291	1.51898
ARHGAP31	33	200	3.33333	MIA PaCa2	TNF	1	4_9	Rep1_4_9	416.268	1.50329	1.51122
ARHGAP31	34	210	3.5	MIA PaCa2	TNF	1	4_9	Rep1_4_9	417.884	1.50298	1.50395
ARHGAP31	35	220	3.66667	MIA PaCa2	TNF	1	4_9	Rep1_4_9	415.883	1.50587	1.49714
ARHGAP31	36	230	3.83333	MIA PaCa2	TNF	1	4_9	Rep1_4_9	415.021	1.50881	1.48748
ARHGAP31	37	240	4	MIA PaCa2	TNF	1	4_9	Rep1_4_9	406.719	1.48498	1.47914
ARHGAP31	38	250	4.16667	MIA PaCa2	TNF	1	4_9	Rep1_4_9	404.972	1.45115	1.46973
ARHGAP31	39	260	4.33333	MIA PaCa2	TNF	1	4_9	Rep1_4_9	404.12	1.45528	1.46236
ARHGAP31	40	270	4.5	MIA PaCa2	TNF	1	4_9	Rep1_4_9	400.234	1.44493	1.45321
ARHGAP31	41	280	4.66667	MIA PaCa2	TNF	1	4_9	Rep1_4_9	398.618	1.43712	1.44532
ARHGAP31	42	290	4.83333	MIA PaCa2	TNF	1	4_9	Rep1_4_9	400.964	1.45423	1.44318
ARHGAP31	43	300	5	MIA PaCa2	TNF	1	4_9	Rep1_4_9	397.199	1.44478	1.43863
ARHGAP31	44	310	5.16667	MIA PaCa2	TNF	1	4_9	Rep1_4_9	398.244	1.42977	1.44068
ARHGAP31	45	320	5.33333	MIA PaCa2	TNF	1	4_9	Rep1_4_9	395.004	1.43614	1.43984
ARHGAP31	46	330	5.5	MIA PaCa2	TNF	1	4_9	Rep1_4_9	397.335	1.42341	1.43545
ARHGAP31	47	340	5.66667	MIA PaCa2	TNF	1	4_9	Rep1_4_9	404.528	1.45931	1.43486
ARHGAP31	48	350	5.83333	MIA PaCa2	TNF	1	4_9	Rep1_4_9	400.311	1.43125	1.43497
ARHGAP31	49	360	6	MIA PaCa2	TNF	1	4_9	Rep1_4_9	394.589	1.42348	1.43108
ARHGAP31	50	370	6.16667	MIA PaCa2	TNF	1	4_9	Rep1_4_9	402.976	1.44069	1.42802
ARHGAP31	51	380	6.33333	MIA PaCa2	TNF	1	4_9	Rep1_4_9	401.324	1.43054	1.42315
ARHGAP31	52	390	6.5	MIA PaCa2	TNF	1	4_9	Rep1_4_9	399.081	1.40891	1.42071
ARHGAP31	53	400	6.66667	MIA PaCa2	TNF	1	4_9	Rep1_4_9	397.8	1.40197	1.41788
ARHGAP31	54	410	6.83333	MIA PaCa2	TNF	1	4_9	Rep1_4_9	406.501	1.4252	1.41588
ARHGAP31	55	420	7	MIA PaCa2	TNF	1	4_9	Rep1_4_9	398.277	1.41418	1.41894
ARHGAP31	56	430	7.16667	MIA PaCa2	TNF	1	4_9	Rep1_4_9	398.403	1.40369	1.42508
ARHGAP31	57	440	7.33333	MIA PaCa2	TNF	1	4_9	Rep1_4_9	405.102	1.42668	1.42739
ARHGAP31	58	450	7.5	MIA PaCa2	TNF	1	4_9	Rep1_4_9	411.488	1.45198	1.42394
ARHGAP31	59	460	7.66667	MIA PaCa2	TNF	1	4_9	Rep1_4_9	410.705	1.45188	1.42326
ARHGAP31	60	470	7.83333	MIA PaCa2	TNF	1	4_9	Rep1_4_9	403.694	1.41814	1.42555
ARHGAP31	61	480	8	MIA PaCa2	TNF	1	4_9	Rep1_4_9	399.245	1.40105	1.42727
ARHGAP31	62	490	8.16667	MIA PaCa2	TNF	1	4_9	Rep1_4_9	399.131	1.40938	1.421
ARHGAP31	63	500	8.33333	MIA PaCa2	TNF	1	4_9	Rep1_4_9	404.6	1.41976	1.41559
ARHGAP31	64	510	8.5	MIA PaCa2	TNF	1	4_9	Rep1_4_9	411.118	1.43867	1.41145
ARHGAP31	65	520	8.66667	MIA PaCa2	TNF	1	4_9	Rep1_4_9	402.222	1.40815	1.4113
ARHGAP31	66	530	8.83333	MIA PaCa2	TNF	1	4_9	Rep1_4_9	404.062	1.41399	1.40999
ARHGAP31	67	540	9	MIA PaCa2	TNF	1	4_9	Rep1_4_9	398.618	1.38917	1.40544
ARHGAP31	68	550	9.16667	MIA PaCa2	TNF	1	4_9	Rep1_4_9	400.24	1.39996	1.3971
ARHGAP31	69	560	9.33333	MIA PaCa2	TNF	1	4_9	Rep1_4_9	399.209	1.40019	1.39514
ARHGAP31	70	570	9.5	MIA PaCa2	TNF	1	4_9	Rep1_4_9	396.915	1.38791	1.3898
ARHGAP31	71	580	9.66667	MIA PaCa2	TNF	1	4_9	Rep1_4_9	392.801	1.38032	1.39328
ARHGAP31	72	590	9.83333	MIA PaCa2	TNF	1	4_9	Rep1_4_9	404.374	1.39446	1.3839
ARHGAP31	73	600	10	MIA PaCa2	TNF	1	4_9	Rep1_4_9	398.108	1.37661	1.37224
ARHGAP31	74	610	10.1667	MIA PaCa2	TNF	1	4_9	Rep1_4_9	413.608	1.41351	1.36774
ARHGAP31	75	620	10.3333	MIA PaCa2	TNF	1	4_9	Rep1_4_9	386.896	1.33427	1.36393
ARHGAP31	76	630	10.5	MIA PaCa2	TNF	1	4_9	Rep1_4_9	383.294	1.31863	1.358
ARHGAP31	77	640	10.6667	MIA PaCa2	TNF	1	4_9	Rep1_4_9	391.77	1.35636	1.35147
ARHGAP31	78	650	10.8333	MIA PaCa2	TNF	1	4_9	Rep1_4_9	392.219	1.35371	1.338
ARHGAP31	79	660	11	MIA PaCa2	TNF	1	4_9	Rep1_4_9	391.425	1.35288	1.34074
ARHGAP31	80	670	11.1667	MIA PaCa2	TNF	1	4_9	Rep1_4_9	383.894	1.33094	1.33877
ARHGAP31	81	680	11.3333	MIA PaCa2	TNF	1	4_9	Rep1_4_9	382.231	1.31921	1.33802
ARHGAP31	82	690	11.5	MIA PaCa2	TNF	1	4_9	Rep1_4_9	392.149	1.35348	1.33393
ARHGAP31	83	700	11.6667	MIA PaCa2	TNF	1	4_9	Rep1_4_9	376.71	1.30484	1.32711
ARHGAP31	84	710	11.8333	MIA PaCa2	TNF	1	4_9	Rep1_4_9	387.331	1.3511	1.32469
ARHGAP31	85	720	12	MIA PaCa2	TNF	1	4_9	Rep1_4_9	381.822	1.32506	1.32226
ARHGAP31	86	730	12.1667	MIA PaCa2	TNF	1	4_9	Rep1_4_9	379.583	1.30518	1.31984
NFKB2	1	-120	-2	MIA PaCa2	TNF	1	11_10	Rep1_11_10	332.442	1.07515	1.09253
NFKB2	2	-110	-1.83333	MIA PaCa2	TNF	1	11_10	Rep1_11_10	335.179	1.115	1.08803
NFKB2	3	-100	-1.66667	MIA PaCa2	TNF	1	11_10	Rep1_11_10	321.355	1.07145	1.08352
NFKB2	4	-90	-1.5	MIA PaCa2	TNF	1	11_10	Rep1_11_10	321.284	1.09484	1.07901
NFKB2	5	-80	-1.33333	MIA PaCa2	TNF	1	11_10	Rep1_11_10	311.255	1.0567	1.07914
NFKB2	6	-70	-1.16667	MIA PaCa2	TNF	1	11_10	Rep1_11_10	311.965	1.07588	1.07507
NFKB2	7	-60	-1	MIA PaCa2	TNF	1	11_10	Rep1_11_10	310.283	1.06408	1.07558
NFKB2	8	-50	-0.833333	MIA PaCa2	TNF	1	11_10	Rep1_11_10	310.337	1.07606	1.07344
NFKB2	9	-40	-0.666667	MIA PaCa2	TNF	1	11_10	Rep1_11_10	311.966	1.08651	1.07635
NFKB2	10	-30	-0.5	MIA PaCa2	TNF	1	11_10	Rep1_11_10	306.15	1.075	1.07518
NFKB2	11	-20	-0.333333	MIA PaCa2	TNF	1	11_10	Rep1_11_10	308.983	1.07983	1.158
NFKB2	12	-10	-0.166667	MIA PaCa2	TNF	1	11_10	Rep1_11_10	305.577	1.07711	1.24135
NFKB2	13	0	0	MIA PaCa2	TNF	1	11_10	Rep1_11_10	302.471	1.06771	1.32343
NFKB2	14	10	0.166667	MIA PaCa2	TNF	1	11_10	Rep1_11_10	456.971	1.64376	1.40633
NFKB2	15	20	0.333333	MIA PaCa2	TNF	1	11_10	Rep1_11_10	467.615	1.65955	1.48764
NFKB2	16	30	0.5	MIA PaCa2	TNF	1	11_10	Rep1_11_10	464.488	1.66104	1.56806
NFKB2	17	40	0.666667	MIA PaCa2	TNF	1	11_10	Rep1_11_10	463.541	1.65531	1.64999
NFKB2	18	50	0.833333	MIA PaCa2	TNF	1	11_10	Rep1_11_10	458.218	1.64901	1.64923
NFKB2	19	60	1	MIA PaCa2	TNF	1	11_10	Rep1_11_10	455.788	1.64004	1.64239
NFKB2	20	70	1.16667	MIA PaCa2	TNF	1	11_10	Rep1_11_10	453.678	1.6412	1.6341
NFKB2	21	80	1.33333	MIA PaCa2	TNF	1	11_10	Rep1_11_10	453.111	1.63845	1.62701
NFKB2	22	90	1.5	MIA PaCa2	TNF	1	11_10	Rep1_11_10	449.941	1.61168	1.61898
NFKB2	23	100	1.66667	MIA PaCa2	TNF	1	11_10	Rep1_11_10	442.066	1.60303	1.61085
NFKB2	24	110	1.83333	MIA PaCa2	TNF	1	11_10	Rep1_11_10	445.453	1.60568	1.60322
NFKB2	25	120	2	MIA PaCa2	TNF	1	11_10	Rep1_11_10	442.543	1.59281	1.59573
NFKB2	26	130	2.16667	MIA PaCa2	TNF	1	11_10	Rep1_11_10	439.082	1.58312	1.59029
NFKB2	27	140	2.33333	MIA PaCa2	TNF	1	11_10	Rep1_11_10	439.976	1.58779	1.58435
NFKB2	28	150	2.5	MIA PaCa2	TNF	1	11_10	Rep1_11_10	437.51	1.58603	1.57607
NFKB2	29	160	2.66667	MIA PaCa2	TNF	1	11_10	Rep1_11_10	434.829	1.57356	1.56813
NFKB2	30	170	2.83333	MIA PaCa2	TNF	1	11_10	Rep1_11_10	430.169	1.56149	1.5596
NFKB2	31	180	3	MIA PaCa2	TNF	1	11_10	Rep1_11_10	428.378	1.54772	1.54786
NFKB2	32	190	3.16667	MIA PaCa2	TNF	1	11_10	Rep1_11_10	426.233	1.5372	1.53006
NFKB2	33	200	3.33333	MIA PaCa2	TNF	1	11_10	Rep1_11_10	421.849	1.52344	1.51897
NFKB2	34	210	3.5	MIA PaCa2	TNF	1	11_10	Rep1_11_10	418.614	1.50561	1.50653
NFKB2	35	220	3.66667	MIA PaCa2	TNF	1	11_10	Rep1_11_10	403.602	1.4614	1.4911
NFKB2	36	230	3.83333	MIA PaCa2	TNF	1	11_10	Rep1_11_10	411.482	1.49594	1.47623
NFKB2	37	240	4	MIA PaCa2	TNF	1	11_10	Rep1_11_10	403.83	1.47443	1.46294
NFKB2	38	250	4.16667	MIA PaCa2	TNF	1	11_10	Rep1_11_10	401.772	1.43968	1.45169
NFKB2	39	260	4.33333	MIA PaCa2	TNF	1	11_10	Rep1_11_10	397.967	1.43312	1.44572
NFKB2	40	270	4.5	MIA PaCa2	TNF	1	11_10	Rep1_11_10	396.212	1.43041	1.43508
NFKB2	41	280	4.66667	MIA PaCa2	TNF	1	11_10	Rep1_11_10	395.759	1.42681	1.42607
NFKB2	42	290	4.83333	MIA PaCa2	TNF	1	11_10	Rep1_11_10	391.42	1.41961	1.41977
NFKB2	43	300	5	MIA PaCa2	TNF	1	11_10	Rep1_11_10	390.795	1.42149	1.4131
NFKB2	44	310	5.16667	MIA PaCa2	TNF	1	11_10	Rep1_11_10	393.114	1.41135	1.40632
NFKB2	45	320	5.33333	MIA PaCa2	TNF	1	11_10	Rep1_11_10	383.858	1.39562	1.39763
NFKB2	46	330	5.5	MIA PaCa2	TNF	1	11_10	Rep1_11_10	387.005	1.38641	1.3941
NFKB2	47	340	5.66667	MIA PaCa2	TNF	1	11_10	Rep1_11_10	383.358	1.38295	1.38482
NFKB2	48	350	5.83333	MIA PaCa2	TNF	1	11_10	Rep1_11_10	382.057	1.36598	1.37583
NFKB2	49	360	6	MIA PaCa2	TNF	1	11_10	Rep1_11_10	386.67	1.39491	1.36693
NFKB2	50	370	6.16667	MIA PaCa2	TNF	1	11_10	Rep1_11_10	379.432	1.35651	1.36178
NFKB2	51	380	6.33333	MIA PaCa2	TNF	1	11_10	Rep1_11_10	378.28	1.3484	1.35155
NFKB2	52	390	6.5	MIA PaCa2	TNF	1	11_10	Rep1_11_10	377.671	1.33332	1.34665
NFKB2	53	400	6.66667	MIA PaCa2	TNF	1	11_10	Rep1_11_10	383.156	1.35036	1.33584
NFKB2	54	410	6.83333	MIA PaCa2	TNF	1	11_10	Rep1_11_10	374.04	1.31139	1.32928
NFKB2	55	420	7	MIA PaCa2	TNF	1	11_10	Rep1_11_10	375.027	1.33163	1.32532
NFKB2	56	430	7.16667	MIA PaCa2	TNF	1	11_10	Rep1_11_10	374.45	1.3193	1.32243
NFKB2	57	440	7.33333	MIA PaCa2	TNF	1	11_10	Rep1_11_10	372.127	1.31055	1.31596
NFKB2	58	450	7.5	MIA PaCa2	TNF	1	11_10	Rep1_11_10	374.285	1.3207	1.31453
NFKB2	59	460	7.66667	MIA PaCa2	TNF	1	11_10	Rep1_11_10	371.436	1.31306	1.30949
NFKB2	60	470	7.83333	MIA PaCa2	TNF	1	11_10	Rep1_11_10	371.52	1.30511	1.30629
NFKB2	61	480	8	MIA PaCa2	TNF	1	11_10	Rep1_11_10	370.845	1.30139	1.30354
NFKB2	62	490	8.16667	MIA PaCa2	TNF	1	11_10	Rep1_11_10	367.114	1.29633	1.30117
NFKB2	63	500	8.33333	MIA PaCa2	TNF	1	11_10	Rep1_11_10	369.586	1.2969	1.29849
NFKB2	64	510	8.5	MIA PaCa2	TNF	1	11_10	Rep1_11_10	369.003	1.29129	1.29515
NFKB2	65	520	8.66667	MIA PaCa2	TNF	1	11_10	Rep1_11_10	372.506	1.30412	1.29314
NFKB2	66	530	8.83333	MIA PaCa2	TNF	1	11_10	Rep1_11_10	369.867	1.29433	1.29155
NFKB2	67	540	9	MIA PaCa2	TNF	1	11_10	Rep1_11_10	367.775	1.28168	1.28813
NFKB2	68	550	9.16667	MIA PaCa2	TNF	1	11_10	Rep1_11_10	368.045	1.28735	1.28609
NFKB2	69	560	9.33333	MIA PaCa2	TNF	1	11_10	Rep1_11_10	366.413	1.28516	1.27961
NFKB2	70	570	9.5	MIA PaCa2	TNF	1	11_10	Rep1_11_10	364.043	1.27296	1.27203
NFKB2	71	580	9.66667	MIA PaCa2	TNF	1	11_10	Rep1_11_10	363.4	1.277	1.26584
NFKB2	72	590	9.83333	MIA PaCa2	TNF	1	11_10	Rep1_11_10	365.035	1.2588	1.26093
NFKB2	73	600	10	MIA PaCa2	TNF	1	11_10	Rep1_11_10	358.955	1.24122	1.25413
NFKB2	74	610	10.1667	MIA PaCa2	TNF	1	11_10	Rep1_11_10	362.356	1.23835	1.25204
NFKB2	75	620	10.3333	MIA PaCa2	TNF	1	11_10	Rep1_11_10	363.339	1.25303	1.24551
NFKB2	76	630	10.5	MIA PaCa2	TNF	1	11_10	Rep1_11_10	359.714	1.23751	1.24342
NFKB2	77	640	10.6667	MIA PaCa2	TNF	1	11_10	Rep1_11_10	363.474	1.25839	1.24373
NFKB2	78	650	10.8333	MIA PaCa2	TNF	1	11_10	Rep1_11_10	356.738	1.23124	1.24481
NFKB2	79	660	11	MIA PaCa2	TNF	1	11_10	Rep1_11_10	359.966	1.24415	1.24218
NFKB2	80	670	11.1667	MIA PaCa2	TNF	1	11_10	Rep1_11_10	358.644	1.24339	1.2396
NFKB2	81	680	11.3333	MIA PaCa2	TNF	1	11_10	Rep1_11_10	361.01	1.24597	1.23713
NFKB2	82	690	11.5	MIA PaCa2	TNF	1	11_10	Rep1_11_10	357.714	1.23463	1.23951
NFKB2	83	700	11.6667	MIA PaCa2	TNF	1	11_10	Rep1_11_10	352.048	1.21941	1.23728
NFKB2	84	710	11.8333	MIA PaCa2	TNF	1	11_10	Rep1_11_10	355.79	1.24108	1.23606
NFKB2	85	720	12	MIA PaCa2	TNF	1	11_10	Rep1_11_10	359.604	1.24796	1.23484
NFKB2	86	730	12.1667	MIA PaCa2	TNF	1	11_10	Rep1_11_10	357.285	1.22851	1.23361
NFKB2	1	-120	-2	MIA PaCa2	TNF	1	11_11	Rep1_11_11	321.037	1.03826	1.05192
NFKB2	2	-110	-1.83333	MIA PaCa2	TNF	1	11_11	Rep1_11_11	316.123	1.05161	1.05167
NFKB2	3	-100	-1.66667	MIA PaCa2	TNF	1	11_11	Rep1_11_11	318	1.06026	1.05141
NFKB2	4	-90	-1.5	MIA PaCa2	TNF	1	11_11	Rep1_11_11	311.057	1.05999	1.05115
NFKB2	5	-80	-1.33333	MIA PaCa2	TNF	1	11_11	Rep1_11_11	311.446	1.05734	1.05089
NFKB2	6	-70	-1.16667	MIA PaCa2	TNF	1	11_11	Rep1_11_11	306.8	1.05806	1.04513
NFKB2	7	-60	-1	MIA PaCa2	TNF	1	11_11	Rep1_11_11	301.084	1.03253	1.04087
NFKB2	8	-50	-0.833333	MIA PaCa2	TNF	1	11_11	Rep1_11_11	298.905	1.03642	1.03949
NFKB2	9	-40	-0.666667	MIA PaCa2	TNF	1	11_11	Rep1_11_11	290.362	1.01127	1.03684
NFKB2	10	-30	-0.5	MIA PaCa2	TNF	1	11_11	Rep1_11_11	293.478	1.0305	1.03643
NFKB2	11	-20	-0.333333	MIA PaCa2	TNF	1	11_11	Rep1_11_11	300.53	1.05029	1.13089
NFKB2	12	-10	-0.166667	MIA PaCa2	TNF	1	11_11	Rep1_11_11	294.714	1.03882	1.21854
NFKB2	13	0	0	MIA PaCa2	TNF	1	11_11	Rep1_11_11	298.929	1.0552	1.30994
NFKB2	14	10	0.166667	MIA PaCa2	TNF	1	11_11	Rep1_11_11	470.86	1.69372	1.39621
NFKB2	15	20	0.333333	MIA PaCa2	TNF	1	11_11	Rep1_11_11	464.921	1.64998	1.48084
NFKB2	16	30	0.5	MIA PaCa2	TNF	1	11_11	Rep1_11_11	461.695	1.65106	1.56639
NFKB2	17	40	0.666667	MIA PaCa2	TNF	1	11_11	Rep1_11_11	457.682	1.63438	1.65112
NFKB2	18	50	0.833333	MIA PaCa2	TNF	1	11_11	Rep1_11_11	456.476	1.64274	1.64478
NFKB2	19	60	1	MIA PaCa2	TNF	1	11_11	Rep1_11_11	455.125	1.63765	1.63903
NFKB2	20	70	1.16667	MIA PaCa2	TNF	1	11_11	Rep1_11_11	455.643	1.64831	1.63756
NFKB2	21	80	1.33333	MIA PaCa2	TNF	1	11_11	Rep1_11_11	456.111	1.6493	1.63447
NFKB2	22	90	1.5	MIA PaCa2	TNF	1	11_11	Rep1_11_11	449.405	1.60976	1.6289
NFKB2	23	100	1.66667	MIA PaCa2	TNF	1	11_11	Rep1_11_11	452.476	1.64078	1.62561
NFKB2	24	110	1.83333	MIA PaCa2	TNF	1	11_11	Rep1_11_11	447.42	1.61277	1.61795
NFKB2	25	120	2	MIA PaCa2	TNF	1	11_11	Rep1_11_11	445.568	1.6037	1.61077
NFKB2	26	130	2.16667	MIA PaCa2	TNF	1	11_11	Rep1_11_11	447.834	1.61468	1.60689
NFKB2	27	140	2.33333	MIA PaCa2	TNF	1	11_11	Rep1_11_11	441.877	1.59465	1.59683
NFKB2	28	150	2.5	MIA PaCa2	TNF	1	11_11	Rep1_11_11	441.109	1.59908	1.59061
NFKB2	29	160	2.66667	MIA PaCa2	TNF	1	11_11	Rep1_11_11	437.322	1.58258	1.58275
NFKB2	30	170	2.83333	MIA PaCa2	TNF	1	11_11	Rep1_11_11	432.615	1.57037	1.56814
NFKB2	31	180	3	MIA PaCa2	TNF	1	11_11	Rep1_11_11	434.322	1.5692	1.55818
NFKB2	32	190	3.16667	MIA PaCa2	TNF	1	11_11	Rep1_11_11	429.425	1.54871	1.54632
NFKB2	33	200	3.33333	MIA PaCa2	TNF	1	11_11	Rep1_11_11	418.795	1.51241	1.53808
NFKB2	34	210	3.5	MIA PaCa2	TNF	1	11_11	Rep1_11_11	423.985	1.52493	1.52791
NFKB2	35	220	3.66667	MIA PaCa2	TNF	1	11_11	Rep1_11_11	418.691	1.51604	1.51334
NFKB2	36	230	3.83333	MIA PaCa2	TNF	1	11_11	Rep1_11_11	419.442	1.52488	1.50173
NFKB2	37	240	4	MIA PaCa2	TNF	1	11_11	Rep1_11_11	410.622	1.49923	1.49254
NFKB2	38	250	4.16667	MIA PaCa2	TNF	1	11_11	Rep1_11_11	409.453	1.46721	1.47949
NFKB2	39	260	4.33333	MIA PaCa2	TNF	1	11_11	Rep1_11_11	407.493	1.46743	1.4695
NFKB2	40	270	4.5	MIA PaCa2	TNF	1	11_11	Rep1_11_11	401.096	1.44804	1.45631
NFKB2	41	280	4.66667	MIA PaCa2	TNF	1	11_11	Rep1_11_11	397.634	1.43358	1.44578
NFKB2	42	290	4.83333	MIA PaCa2	TNF	1	11_11	Rep1_11_11	398.726	1.44611	1.44063
NFKB2	43	300	5	MIA PaCa2	TNF	1	11_11	Rep1_11_11	393.849	1.4326	1.42853
NFKB2	44	310	5.16667	MIA PaCa2	TNF	1	11_11	Rep1_11_11	397.064	1.42554	1.4237
NFKB2	45	320	5.33333	MIA PaCa2	TNF	1	11_11	Rep1_11_11	393.627	1.43113	1.4173
NFKB2	46	330	5.5	MIA PaCa2	TNF	1	11_11	Rep1_11_11	385.98	1.38273	1.40921
NFKB2	47	340	5.66667	MIA PaCa2	TNF	1	11_11	Rep1_11_11	392.019	1.41419	1.4004
NFKB2	48	350	5.83333	MIA PaCa2	TNF	1	11_11	Rep1_11_11	388.45	1.38884	1.39488
NFKB2	49	360	6	MIA PaCa2	TNF	1	11_11	Rep1_11_11	385.154	1.38944	1.38818
NFKB2	50	370	6.16667	MIA PaCa2	TNF	1	11_11	Rep1_11_11	383.474	1.37096	1.38708
NFKB2	51	380	6.33333	MIA PaCa2	TNF	1	11_11	Rep1_11_11	389.06	1.38683	1.3813
NFKB2	52	390	6.5	MIA PaCa2	TNF	1	11_11	Rep1_11_11	392.108	1.38429	1.37989
NFKB2	53	400	6.66667	MIA PaCa2	TNF	1	11_11	Rep1_11_11	390.143	1.37498	1.37635
NFKB2	54	410	6.83333	MIA PaCa2	TNF	1	11_11	Rep1_11_11	391.826	1.37375	1.36784
NFKB2	55	420	7	MIA PaCa2	TNF	1	11_11	Rep1_11_11	388.36	1.37897	1.36271
NFKB2	56	430	7.16667	MIA PaCa2	TNF	1	11_11	Rep1_11_11	387.318	1.36464	1.35685
NFKB2	57	440	7.33333	MIA PaCa2	TNF	1	11_11	Rep1_11_11	372.373	1.31142	1.35224
NFKB2	58	450	7.5	MIA PaCa2	TNF	1	11_11	Rep1_11_11	382.85	1.35093	1.34494
NFKB2	59	460	7.66667	MIA PaCa2	TNF	1	11_11	Rep1_11_11	379.991	1.3433	1.34137
NFKB2	60	470	7.83333	MIA PaCa2	TNF	1	11_11	Rep1_11_11	382.217	1.34269	1.33863
NFKB2	61	480	8	MIA PaCa2	TNF	1	11_11	Rep1_11_11	376.901	1.32264	1.34095
NFKB2	62	490	8.16667	MIA PaCa2	TNF	1	11_11	Rep1_11_11	383.443	1.35398	1.33725
NFKB2	63	500	8.33333	MIA PaCa2	TNF	1	11_11	Rep1_11_11	383.431	1.34548	1.33125
NFKB2	64	510	8.5	MIA PaCa2	TNF	1	11_11	Rep1_11_11	379.388	1.32764	1.32294
NFKB2	65	520	8.66667	MIA PaCa2	TNF	1	11_11	Rep1_11_11	378.478	1.32502	1.31915
NFKB2	66	530	8.83333	MIA PaCa2	TNF	1	11_11	Rep1_11_11	371.854	1.30128	1.31022
NFKB2	67	540	9	MIA PaCa2	TNF	1	11_11	Rep1_11_11	368.587	1.28451	1.30664
NFKB2	68	550	9.16667	MIA PaCa2	TNF	1	11_11	Rep1_11_11	370.562	1.29615	1.29914
NFKB2	69	560	9.33333	MIA PaCa2	TNF	1	11_11	Rep1_11_11	368.216	1.29148	1.29081
NFKB2	70	570	9.5	MIA PaCa2	TNF	1	11_11	Rep1_11_11	377.616	1.32042	1.28923
NFKB2	71	580	9.66667	MIA PaCa2	TNF	1	11_11	Rep1_11_11	362.865	1.27512	1.28126
NFKB2	72	590	9.83333	MIA PaCa2	TNF	1	11_11	Rep1_11_11	367.326	1.2667	1.27539
NFKB2	73	600	10	MIA PaCa2	TNF	1	11_11	Rep1_11_11	373.132	1.29025	1.26758
NFKB2	74	610	10.1667	MIA PaCa2	TNF	1	11_11	Rep1_11_11	359.528	1.22869	1.25734
NFKB2	75	620	10.3333	MIA PaCa2	TNF	1	11_11	Rep1_11_11	363.939	1.2551	1.25108
NFKB2	76	630	10.5	MIA PaCa2	TNF	1	11_11	Rep1_11_11	359.498	1.23677	1.2471
NFKB2	77	640	10.6667	MIA PaCa2	TNF	1	11_11	Rep1_11_11	360.697	1.24878	1.23777
NFKB2	78	650	10.8333	MIA PaCa2	TNF	1	11_11	Rep1_11_11	356.74	1.23125	1.23732
NFKB2	79	660	11	MIA PaCa2	TNF	1	11_11	Rep1_11_11	358.434	1.23886	1.23735
NFKB2	80	670	11.1667	MIA PaCa2	TNF	1	11_11	Rep1_11_11	353.327	1.22496	1.23956
NFKB2	81	680	11.3333	MIA PaCa2	TNF	1	11_11	Rep1_11_11	355.081	1.22551	1.2385
NFKB2	82	690	11.5	MIA PaCa2	TNF	1	11_11	Rep1_11_11	363.717	1.25535	1.23726
NFKB2	83	700	11.6667	MIA PaCa2	TNF	1	11_11	Rep1_11_11	361.522	1.25223	1.23486
NFKB2	84	710	11.8333	MIA PaCa2	TNF	1	11_11	Rep1_11_11	355.876	1.24138	1.23385
NFKB2	85	720	12	MIA PaCa2	TNF	1	11_11	Rep1_11_11	352.272	1.22251	1.23283
NFKB2	86	730	12.1667	MIA PaCa2	TNF	1	11_11	Rep1_11_11	355.426	1.22212	1.23181
NFKB2	1	-120	-2	MIA PaCa2	Control	1	11_3	Rep1_11_3	337.449	1.09134	1.08523
NFKB2	2	-110	-1.83333	MIA PaCa2	Control	1	11_3	Rep1_11_3	322.592	1.07313	1.08112
NFKB2	3	-100	-1.66667	MIA PaCa2	Control	1	11_3	Rep1_11_3	319.114	1.06398	1.07702
NFKB2	4	-90	-1.5	MIA PaCa2	Control	1	11_3	Rep1_11_3	318.397	1.085	1.07292
NFKB2	5	-80	-1.33333	MIA PaCa2	Control	1	11_3	Rep1_11_3	318.361	1.08082	1.06649
NFKB2	6	-70	-1.16667	MIA PaCa2	Control	1	11_3	Rep1_11_3	307.344	1.05994	1.06412
NFKB2	7	-60	-1	MIA PaCa2	Control	1	11_3	Rep1_11_3	307.993	1.05623	1.06188
NFKB2	8	-50	-0.833333	MIA PaCa2	Control	1	11_3	Rep1_11_3	301.764	1.04633	1.05739
NFKB2	9	-40	-0.666667	MIA PaCa2	Control	1	11_3	Rep1_11_3	303.356	1.05652	1.05277
NFKB2	10	-30	-0.5	MIA PaCa2	Control	1	11_3	Rep1_11_3	298.552	1.04832	1.05355
NFKB2	11	-20	-0.333333	MIA PaCa2	Control	1	11_3	Rep1_11_3	301.459	1.05354	1.05774
NFKB2	12	-10	-0.166667	MIA PaCa2	Control	1	11_3	Rep1_11_3	297.455	1.04848	1.05715
NFKB2	13	0	0	MIA PaCa2	Control	1	11_3	Rep1_11_3	301.824	1.06542	1.0558
NFKB2	14	10	0.166667	MIA PaCa2	Control	1	11_3	Rep1_11_3	301.793	1.08557	1.05716
NFKB2	15	20	0.333333	MIA PaCa2	Control	1	11_3	Rep1_11_3	293.658	1.04218	1.05893
NFKB2	16	30	0.5	MIA PaCa2	Control	1	11_3	Rep1_11_3	292.812	1.04712	1.0613
NFKB2	17	40	0.666667	MIA PaCa2	Control	1	11_3	Rep1_11_3	296.222	1.05781	1.05728
NFKB2	18	50	0.833333	MIA PaCa2	Control	1	11_3	Rep1_11_3	296.187	1.0659	1.05143
NFKB2	19	60	1	MIA PaCa2	Control	1	11_3	Rep1_11_3	296.008	1.06511	1.04987
NFKB2	20	70	1.16667	MIA PaCa2	Control	1	11_3	Rep1_11_3	286.734	1.03727	1.048
NFKB2	21	80	1.33333	MIA PaCa2	Control	1	11_3	Rep1_11_3	288.888	1.04462	1.04466
NFKB2	22	90	1.5	MIA PaCa2	Control	1	11_3	Rep1_11_3	287.902	1.03126	1.04263
NFKB2	23	100	1.66667	MIA PaCa2	Control	1	11_3	Rep1_11_3	285.154	1.03403	1.04089
NFKB2	24	110	1.83333	MIA PaCa2	Control	1	11_3	Rep1_11_3	286.983	1.03446	1.04211
NFKB2	25	120	2	MIA PaCa2	Control	1	11_3	Rep1_11_3	292.194	1.05167	1.04073
NFKB2	26	130	2.16667	MIA PaCa2	Control	1	11_3	Rep1_11_3	292.034	1.05294	1.04095
NFKB2	27	140	2.33333	MIA PaCa2	Control	1	11_3	Rep1_11_3	289.788	1.04579	1.04088
NFKB2	28	150	2.5	MIA PaCa2	Control	1	11_3	Rep1_11_3	285.503	1.03498	1.0418
NFKB2	29	160	2.66667	MIA PaCa2	Control	1	11_3	Rep1_11_3	285.387	1.03276	1.04137
NFKB2	30	170	2.83333	MIA PaCa2	Control	1	11_3	Rep1_11_3	284.732	1.03356	1.03851
NFKB2	31	180	3	MIA PaCa2	Control	1	11_3	Rep1_11_3	288.108	1.04093	1.03873
NFKB2	32	190	3.16667	MIA PaCa2	Control	1	11_3	Rep1_11_3	290.76	1.04862	1.04032
NFKB2	33	200	3.33333	MIA PaCa2	Control	1	11_3	Rep1_11_3	286.025	1.03294	1.04508
NFKB2	34	210	3.5	MIA PaCa2	Control	1	11_3	Rep1_11_3	291.185	1.04729	1.0488
NFKB2	35	220	3.66667	MIA PaCa2	Control	1	11_3	Rep1_11_3	288.919	1.04614	1.04903
NFKB2	36	230	3.83333	MIA PaCa2	Control	1	11_3	Rep1_11_3	293.235	1.06606	1.04882
NFKB2	37	240	4	MIA PaCa2	Control	1	11_3	Rep1_11_3	290.215	1.05961	1.05122
NFKB2	38	250	4.16667	MIA PaCa2	Control	1	11_3	Rep1_11_3	290.953	1.04258	1.05137
NFKB2	39	260	4.33333	MIA PaCa2	Control	1	11_3	Rep1_11_3	290.771	1.0471	1.0532
NFKB2	40	270	4.5	MIA PaCa2	Control	1	11_3	Rep1_11_3	290.772	1.04975	1.05068
NFKB2	41	280	4.66667	MIA PaCa2	Control	1	11_3	Rep1_11_3	290.777	1.04833	1.04915
NFKB2	42	290	4.83333	MIA PaCa2	Control	1	11_3	Rep1_11_3	291.994	1.05901	1.05188
NFKB2	43	300	5	MIA PaCa2	Control	1	11_3	Rep1_11_3	288.213	1.04836	1.05012
NFKB2	44	310	5.16667	MIA PaCa2	Control	1	11_3	Rep1_11_3	292.167	1.04894	1.04885
NFKB2	45	320	5.33333	MIA PaCa2	Control	1	11_3	Rep1_11_3	292.009	1.06168	1.04747
NFKB2	46	330	5.5	MIA PaCa2	Control	1	11_3	Rep1_11_3	288.856	1.0348	1.04785
NFKB2	47	340	5.66667	MIA PaCa2	Control	1	11_3	Rep1_11_3	288.518	1.04082	1.04781
NFKB2	48	350	5.83333	MIA PaCa2	Control	1	11_3	Rep1_11_3	290.519	1.0387	1.04743
NFKB2	49	360	6	MIA PaCa2	Control	1	11_3	Rep1_11_3	294.297	1.06168	1.04677
NFKB2	50	370	6.16667	MIA PaCa2	Control	1	11_3	Rep1_11_3	293.158	1.04807	1.04906
NFKB2	51	380	6.33333	MIA PaCa2	Control	1	11_3	Rep1_11_3	293.529	1.0463	1.04969
NFKB2	52	390	6.5	MIA PaCa2	Control	1	11_3	Rep1_11_3	299.401	1.057	1.05415
NFKB2	53	400	6.66667	MIA PaCa2	Control	1	11_3	Rep1_11_3	298.166	1.05082	1.05104
NFKB2	54	410	6.83333	MIA PaCa2	Control	1	11_3	Rep1_11_3	298.137	1.04527	1.05166
NFKB2	55	420	7	MIA PaCa2	Control	1	11_3	Rep1_11_3	301.325	1.06993	1.05263
NFKB2	56	430	7.16667	MIA PaCa2	Control	1	11_3	Rep1_11_3	295.151	1.03991	1.0513
NFKB2	57	440	7.33333	MIA PaCa2	Control	1	11_3	Rep1_11_3	298.823	1.05239	1.05265
NFKB2	58	450	7.5	MIA PaCa2	Control	1	11_3	Rep1_11_3	298.444	1.05309	1.05282
NFKB2	59	460	7.66667	MIA PaCa2	Control	1	11_3	Rep1_11_3	296.366	1.04768	1.04974
NFKB2	60	470	7.83333	MIA PaCa2	Control	1	11_3	Rep1_11_3	301.824	1.06028	1.05138
NFKB2	61	480	8	MIA PaCa2	Control	1	11_3	Rep1_11_3	298.205	1.04647	1.05211
NFKB2	62	490	8.16667	MIA PaCa2	Control	1	11_3	Rep1_11_3	296.9	1.04839	1.05267
NFKB2	63	500	8.33333	MIA PaCa2	Control	1	11_3	Rep1_11_3	299.616	1.05137	1.0561
NFKB2	64	510	8.5	MIA PaCa2	Control	1	11_3	Rep1_11_3	302.19	1.05749	1.05634
NFKB2	65	520	8.66667	MIA PaCa2	Control	1	11_3	Rep1_11_3	301.915	1.05698	1.05962
NFKB2	66	530	8.83333	MIA PaCa2	Control	1	11_3	Rep1_11_3	306.254	1.07172	1.05993
NFKB2	67	540	9	MIA PaCa2	Control	1	11_3	Rep1_11_3	304.724	1.06195	1.06364
NFKB2	68	550	9.16667	MIA PaCa2	Control	1	11_3	Rep1_11_3	305.739	1.06941	1.06546
NFKB2	69	560	9.33333	MIA PaCa2	Control	1	11_3	Rep1_11_3	299.53	1.05058	1.06435
NFKB2	70	570	9.5	MIA PaCa2	Control	1	11_3	Rep1_11_3	308.11	1.07738	1.0625
NFKB2	71	580	9.66667	MIA PaCa2	Control	1	11_3	Rep1_11_3	304.547	1.07019	1.05872
NFKB2	72	590	9.83333	MIA PaCa2	Control	1	11_3	Rep1_11_3	304.269	1.04925	1.05816
NFKB2	73	600	10	MIA PaCa2	Control	1	11_3	Rep1_11_3	306.175	1.05872	1.05719
NFKB2	74	610	10.1667	MIA PaCa2	Control	1	11_3	Rep1_11_3	303.008	1.03553	1.0569
NFKB2	75	620	10.3333	MIA PaCa2	Control	1	11_3	Rep1_11_3	308.959	1.06549	1.05835
NFKB2	76	630	10.5	MIA PaCa2	Control	1	11_3	Rep1_11_3	303.393	1.04375	1.06148
NFKB2	77	640	10.6667	MIA PaCa2	Control	1	11_3	Rep1_11_3	310.601	1.07534	1.06353
NFKB2	78	650	10.8333	MIA PaCa2	Control	1	11_3	Rep1_11_3	313.02	1.08036	1.06683
NFKB2	79	660	11	MIA PaCa2	Control	1	11_3	Rep1_11_3	309.926	1.0712	1.06616
NFKB2	80	670	11.1667	MIA PaCa2	Control	1	11_3	Rep1_11_3	309.503	1.07303	1.07092
NFKB2	81	680	11.3333	MIA PaCa2	Control	1	11_3	Rep1_11_3	306.734	1.05864	1.07221
NFKB2	82	690	11.5	MIA PaCa2	Control	1	11_3	Rep1_11_3	307.347	1.06079	1.0706
NFKB2	83	700	11.6667	MIA PaCa2	Control	1	11_3	Rep1_11_3	310.958	1.07708	1.07067
NFKB2	84	710	11.8333	MIA PaCa2	Control	1	11_3	Rep1_11_3	310.867	1.08438	1.07211
NFKB2	85	720	12	MIA PaCa2	Control	1	11_3	Rep1_11_3	308.058	1.06907	1.07356
NFKB2	86	730	12.1667	MIA PaCa2	Control	1	11_3	Rep1_11_3	311.677	1.07169	1.075
NFKB2	1	-120	-2	MIA PaCa2	Control	1	11_4	Rep1_11_4	324.672	1.05002	1.06295
NFKB2	2	-110	-1.83333	MIA PaCa2	Control	1	11_4	Rep1_11_4	314.085	1.04483	1.0565
NFKB2	3	-100	-1.66667	MIA PaCa2	Control	1	11_4	Rep1_11_4	320.178	1.06752	1.05005
NFKB2	4	-90	-1.5	MIA PaCa2	Control	1	11_4	Rep1_11_4	312.954	1.06645	1.0436
NFKB2	5	-80	-1.33333	MIA PaCa2	Control	1	11_4	Rep1_11_4	307.27	1.04317	1.03829
NFKB2	6	-70	-1.16667	MIA PaCa2	Control	1	11_4	Rep1_11_4	294.661	1.0162	1.03469
NFKB2	7	-60	-1	MIA PaCa2	Control	1	11_4	Rep1_11_4	296.556	1.017	1.02747
NFKB2	8	-50	-0.833333	MIA PaCa2	Control	1	11_4	Rep1_11_4	292.11	1.01286	1.02213
NFKB2	9	-40	-0.666667	MIA PaCa2	Control	1	11_4	Rep1_11_4	292.753	1.01959	1.02189
NFKB2	10	-30	-0.5	MIA PaCa2	Control	1	11_4	Rep1_11_4	289.64	1.01703	1.02383
NFKB2	11	-20	-0.333333	MIA PaCa2	Control	1	11_4	Rep1_11_4	294.453	1.02906	1.0284
NFKB2	12	-10	-0.166667	MIA PaCa2	Control	1	11_4	Rep1_11_4	295.477	1.04151	1.02941
NFKB2	13	0	0	MIA PaCa2	Control	1	11_4	Rep1_11_4	291.723	1.02976	1.0281
NFKB2	14	10	0.166667	MIA PaCa2	Control	1	11_4	Rep1_11_4	291.624	1.04899	1.02988
NFKB2	15	20	0.333333	MIA PaCa2	Control	1	11_4	Rep1_11_4	287.385	1.01992	1.03047
NFKB2	16	30	0.5	MIA PaCa2	Control	1	11_4	Rep1_11_4	282.556	1.01044	1.03054
NFKB2	17	40	0.666667	MIA PaCa2	Control	1	11_4	Rep1_11_4	288.288	1.02948	1.03136
NFKB2	18	50	0.833333	MIA PaCa2	Control	1	11_4	Rep1_11_4	287.093	1.03318	1.02858
NFKB2	19	60	1	MIA PaCa2	Control	1	11_4	Rep1_11_4	289.597	1.04204	1.02763
NFKB2	20	70	1.16667	MIA PaCa2	Control	1	11_4	Rep1_11_4	286.23	1.03545	1.03098
NFKB2	21	80	1.33333	MIA PaCa2	Control	1	11_4	Rep1_11_4	284.713	1.02952	1.03041
NFKB2	22	90	1.5	MIA PaCa2	Control	1	11_4	Rep1_11_4	282.885	1.01329	1.02876
NFKB2	23	100	1.66667	MIA PaCa2	Control	1	11_4	Rep1_11_4	285.119	1.03391	1.02629
NFKB2	24	110	1.83333	MIA PaCa2	Control	1	11_4	Rep1_11_4	284.49	1.02547	1.02526
NFKB2	25	120	2	MIA PaCa2	Control	1	11_4	Rep1_11_4	283.85	1.02164	1.02469
NFKB2	26	130	2.16667	MIA PaCa2	Control	1	11_4	Rep1_11_4	284.225	1.02478	1.0274
NFKB2	27	140	2.33333	MIA PaCa2	Control	1	11_4	Rep1_11_4	284.923	1.02823	1.02704
NFKB2	28	150	2.5	MIA PaCa2	Control	1	11_4	Rep1_11_4	282.891	1.02552	1.02656
NFKB2	29	160	2.66667	MIA PaCa2	Control	1	11_4	Rep1_11_4	285.239	1.03222	1.02752
NFKB2	30	170	2.83333	MIA PaCa2	Control	1	11_4	Rep1_11_4	284.136	1.03139	1.02694
NFKB2	31	180	3	MIA PaCa2	Control	1	11_4	Rep1_11_4	282.914	1.02216	1.02547
NFKB2	32	190	3.16667	MIA PaCa2	Control	1	11_4	Rep1_11_4	285.126	1.0283	1.02455
NFKB2	33	200	3.33333	MIA PaCa2	Control	1	11_4	Rep1_11_4	282.652	1.02075	1.02383
NFKB2	34	210	3.5	MIA PaCa2	Control	1	11_4	Rep1_11_4	283.03	1.01796	1.02331
NFKB2	35	220	3.66667	MIA PaCa2	Control	1	11_4	Rep1_11_4	281.432	1.01904	1.02454
NFKB2	36	230	3.83333	MIA PaCa2	Control	1	11_4	Rep1_11_4	282.541	1.02718	1.02283
NFKB2	37	240	4	MIA PaCa2	Control	1	11_4	Rep1_11_4	281.501	1.02779	1.025
NFKB2	38	250	4.16667	MIA PaCa2	Control	1	11_4	Rep1_11_4	287.646	1.03073	1.02646
NFKB2	39	260	4.33333	MIA PaCa2	Control	1	11_4	Rep1_11_4	282.239	1.01637	1.03082
NFKB2	40	270	4.5	MIA PaCa2	Control	1	11_4	Rep1_11_4	286.949	1.03595	1.03319
NFKB2	41	280	4.66667	MIA PaCa2	Control	1	11_4	Rep1_11_4	285.187	1.02817	1.03229
NFKB2	42	290	4.83333	MIA PaCa2	Control	1	11_4	Rep1_11_4	289.392	1.04957	1.03051
NFKB2	43	300	5	MIA PaCa2	Control	1	11_4	Rep1_11_4	286.938	1.04372	1.02975
NFKB2	44	310	5.16667	MIA PaCa2	Control	1	11_4	Rep1_11_4	284.524	1.0215	1.02628
NFKB2	45	320	5.33333	MIA PaCa2	Control	1	11_4	Rep1_11_4	280.067	1.01826	1.02391
NFKB2	46	330	5.5	MIA PaCa2	Control	1	11_4	Rep1_11_4	282.241	1.0111	1.02123
NFKB2	47	340	5.66667	MIA PaCa2	Control	1	11_4	Rep1_11_4	280.435	1.01166	1.01676
NFKB2	48	350	5.83333	MIA PaCa2	Control	1	11_4	Rep1_11_4	282.935	1.01159	1.01632
NFKB2	49	360	6	MIA PaCa2	Control	1	11_4	Rep1_11_4	285.728	1.03076	1.01415
NFKB2	50	370	6.16667	MIA PaCa2	Control	1	11_4	Rep1_11_4	283.2	1.01247	1.01492
NFKB2	51	380	6.33333	MIA PaCa2	Control	1	11_4	Rep1_11_4	285.703	1.01841	1.01693
NFKB2	52	390	6.5	MIA PaCa2	Control	1	11_4	Rep1_11_4	284.117	1.00304	1.01856
NFKB2	53	400	6.66667	MIA PaCa2	Control	1	11_4	Rep1_11_4	288.434	1.01653	1.01819
NFKB2	54	410	6.83333	MIA PaCa2	Control	1	11_4	Rep1_11_4	292.552	1.02569	1.01874
NFKB2	55	420	7	MIA PaCa2	Control	1	11_4	Rep1_11_4	288.118	1.02303	1.01909
NFKB2	56	430	7.16667	MIA PaCa2	Control	1	11_4	Rep1_11_4	291.807	1.02812	1.02171
NFKB2	57	440	7.33333	MIA PaCa2	Control	1	11_4	Rep1_11_4	288.593	1.01636	1.02418
NFKB2	58	450	7.5	MIA PaCa2	Control	1	11_4	Rep1_11_4	289.305	1.02084	1.02399
NFKB2	59	460	7.66667	MIA PaCa2	Control	1	11_4	Rep1_11_4	288.926	1.02138	1.02598
NFKB2	60	470	7.83333	MIA PaCa2	Control	1	11_4	Rep1_11_4	294.303	1.03386	1.02319
NFKB2	61	480	8	MIA PaCa2	Control	1	11_4	Rep1_11_4	291.904	1.02436	1.02184
NFKB2	62	490	8.16667	MIA PaCa2	Control	1	11_4	Rep1_11_4	293.663	1.03696	1.02096
NFKB2	63	500	8.33333	MIA PaCa2	Control	1	11_4	Rep1_11_4	287.428	1.0086	1.02032
NFKB2	64	510	8.5	MIA PaCa2	Control	1	11_4	Rep1_11_4	287.725	1.00687	1.01567
NFKB2	65	520	8.66667	MIA PaCa2	Control	1	11_4	Rep1_11_4	289.826	1.01466	1.01514
NFKB2	66	530	8.83333	MIA PaCa2	Control	1	11_4	Rep1_11_4	290.593	1.01691	1.01328
NFKB2	67	540	9	MIA PaCa2	Control	1	11_4	Rep1_11_4	287.333	1.00135	1.01538
NFKB2	68	550	9.16667	MIA PaCa2	Control	1	11_4	Rep1_11_4	291.785	1.0206	1.02015
NFKB2	69	560	9.33333	MIA PaCa2	Control	1	11_4	Rep1_11_4	291.944	1.02397	1.02181
NFKB2	70	570	9.5	MIA PaCa2	Control	1	11_4	Rep1_11_4	292.648	1.02331	1.02323
NFKB2	71	580	9.66667	MIA PaCa2	Control	1	11_4	Rep1_11_4	296.015	1.04021	1.02321
NFKB2	72	590	9.83333	MIA PaCa2	Control	1	11_4	Rep1_11_4	297.621	1.02633	1.0214
NFKB2	73	600	10	MIA PaCa2	Control	1	11_4	Rep1_11_4	296.952	1.02683	1.01953
NFKB2	74	610	10.1667	MIA PaCa2	Control	1	11_4	Rep1_11_4	292.972	1.00123	1.01835
NFKB2	75	620	10.3333	MIA PaCa2	Control	1	11_4	Rep1_11_4	292.265	1.00792	1.01451
NFKB2	76	630	10.5	MIA PaCa2	Control	1	11_4	Rep1_11_4	293.842	1.01089	1.01501
NFKB2	77	640	10.6667	MIA PaCa2	Control	1	11_4	Rep1_11_4	293.186	1.01505	1.01709
NFKB2	78	650	10.8333	MIA PaCa2	Control	1	11_4	Rep1_11_4	293.606	1.01335	1.02075
NFKB2	79	660	11	MIA PaCa2	Control	1	11_4	Rep1_11_4	297.946	1.02979	1.02008
NFKB2	80	670	11.1667	MIA PaCa2	Control	1	11_4	Rep1_11_4	300.383	1.04141	1.02223
NFKB2	81	680	11.3333	MIA PaCa2	Control	1	11_4	Rep1_11_4	297.522	1.02685	1.02364
NFKB2	82	690	11.5	MIA PaCa2	Control	1	11_4	Rep1_11_4	290.673	1.00324	1.02645
NFKB2	83	700	11.6667	MIA PaCa2	Control	1	11_4	Rep1_11_4	296.194	1.02595	1.02378
NFKB2	84	710	11.8333	MIA PaCa2	Control	1	11_4	Rep1_11_4	293.811	1.02488	1.02175
NFKB2	85	720	12	MIA PaCa2	Control	1	11_4	Rep1_11_4	297.683	1.03307	1.01972
NFKB2	86	730	12.1667	MIA PaCa2	Control	1	11_4	Rep1_11_4	294.05	1.01108	1.01769
NFKB2	1	-120	-2	MIA PaCa2	Control	1	11_5	Rep1_11_5	328.581	1.06266	1.06
NFKB2	2	-110	-1.83333	MIA PaCa2	Control	1	11_5	Rep1_11_5	321.725	1.07024	1.05387
NFKB2	3	-100	-1.66667	MIA PaCa2	Control	1	11_5	Rep1_11_5	304.989	1.01688	1.04774
NFKB2	4	-90	-1.5	MIA PaCa2	Control	1	11_5	Rep1_11_5	307.542	1.04801	1.0416
NFKB2	5	-80	-1.33333	MIA PaCa2	Control	1	11_5	Rep1_11_5	302.535	1.02709	1.03998
NFKB2	6	-70	-1.16667	MIA PaCa2	Control	1	11_5	Rep1_11_5	305.178	1.05247	1.0351
NFKB2	7	-60	-1	MIA PaCa2	Control	1	11_5	Rep1_11_5	295.64	1.01386	1.03876
NFKB2	8	-50	-0.833333	MIA PaCa2	Control	1	11_5	Rep1_11_5	303.191	1.05128	1.03604
NFKB2	9	-40	-0.666667	MIA PaCa2	Control	1	11_5	Rep1_11_5	297.499	1.03612	1.03798
NFKB2	10	-30	-0.5	MIA PaCa2	Control	1	11_5	Rep1_11_5	296.881	1.04245	1.03511
NFKB2	11	-20	-0.333333	MIA PaCa2	Control	1	11_5	Rep1_11_5	294.438	1.02901	1.0393
NFKB2	12	-10	-0.166667	MIA PaCa2	Control	1	11_5	Rep1_11_5	295.231	1.04064	1.03389
NFKB2	13	0	0	MIA PaCa2	Control	1	11_5	Rep1_11_5	292.468	1.03239	1.03459
NFKB2	14	10	0.166667	MIA PaCa2	Control	1	11_5	Rep1_11_5	290.008	1.04318	1.03035
NFKB2	15	20	0.333333	MIA PaCa2	Control	1	11_5	Rep1_11_5	285.562	1.01345	1.03268
NFKB2	16	30	0.5	MIA PaCa2	Control	1	11_5	Rep1_11_5	291.098	1.04099	1.03384
NFKB2	17	40	0.666667	MIA PaCa2	Control	1	11_5	Rep1_11_5	283.612	1.01278	1.03597
NFKB2	18	50	0.833333	MIA PaCa2	Control	1	11_5	Rep1_11_5	290.472	1.04533	1.03834
NFKB2	19	60	1	MIA PaCa2	Control	1	11_5	Rep1_11_5	291.469	1.04878	1.04234
NFKB2	20	70	1.16667	MIA PaCa2	Control	1	11_5	Rep1_11_5	289.503	1.04729	1.04217
NFKB2	21	80	1.33333	MIA PaCa2	Control	1	11_5	Rep1_11_5	293.067	1.05973	1.04484
NFKB2	22	90	1.5	MIA PaCa2	Control	1	11_5	Rep1_11_5	290.751	1.04146	1.04568
NFKB2	23	100	1.66667	MIA PaCa2	Control	1	11_5	Rep1_11_5	286.752	1.03983	1.04565
NFKB2	24	110	1.83333	MIA PaCa2	Control	1	11_5	Rep1_11_5	286.151	1.03146	1.0442
NFKB2	25	120	2	MIA PaCa2	Control	1	11_5	Rep1_11_5	292.063	1.0512	1.0427
NFKB2	26	130	2.16667	MIA PaCa2	Control	1	11_5	Rep1_11_5	290.817	1.04855	1.04315
NFKB2	27	140	2.33333	MIA PaCa2	Control	1	11_5	Rep1_11_5	287.405	1.03719	1.04294
NFKB2	28	150	2.5	MIA PaCa2	Control	1	11_5	Rep1_11_5	289.431	1.04922	1.04369
NFKB2	29	160	2.66667	MIA PaCa2	Control	1	11_5	Rep1_11_5	288.658	1.04459	1.04272
NFKB2	30	170	2.83333	MIA PaCa2	Control	1	11_5	Rep1_11_5	286.051	1.03835	1.0407
NFKB2	31	180	3	MIA PaCa2	Control	1	11_5	Rep1_11_5	286.944	1.03672	1.04105
NFKB2	32	190	3.16667	MIA PaCa2	Control	1	11_5	Rep1_11_5	289.591	1.0444	1.03856
NFKB2	33	200	3.33333	MIA PaCa2	Control	1	11_5	Rep1_11_5	286.437	1.03442	1.03965
NFKB2	34	210	3.5	MIA PaCa2	Control	1	11_5	Rep1_11_5	289.051	1.03962	1.04172
NFKB2	35	220	3.66667	MIA PaCa2	Control	1	11_5	Rep1_11_5	284.952	1.03178	1.04398
NFKB2	36	230	3.83333	MIA PaCa2	Control	1	11_5	Rep1_11_5	289.436	1.05224	1.04442
NFKB2	37	240	4	MIA PaCa2	Control	1	11_5	Rep1_11_5	288.368	1.05286	1.04428
NFKB2	38	250	4.16667	MIA PaCa2	Control	1	11_5	Rep1_11_5	293.725	1.05251	1.04353
NFKB2	39	260	4.33333	MIA PaCa2	Control	1	11_5	Rep1_11_5	290.872	1.04746	1.04414
NFKB2	40	270	4.5	MIA PaCa2	Control	1	11_5	Rep1_11_5	286.271	1.0335	1.04469
NFKB2	41	280	4.66667	MIA PaCa2	Control	1	11_5	Rep1_11_5	286.89	1.03432	1.04613
NFKB2	42	290	4.83333	MIA PaCa2	Control	1	11_5	Rep1_11_5	285.678	1.0361	1.04798
NFKB2	43	300	5	MIA PaCa2	Control	1	11_5	Rep1_11_5	290.338	1.05609	1.0449
NFKB2	44	310	5.16667	MIA PaCa2	Control	1	11_5	Rep1_11_5	296.065	1.06293	1.04582
NFKB2	45	320	5.33333	MIA PaCa2	Control	1	11_5	Rep1_11_5	293.06	1.0655	1.04776
NFKB2	46	330	5.5	MIA PaCa2	Control	1	11_5	Rep1_11_5	286.37	1.02589	1.05092
NFKB2	47	340	5.66667	MIA PaCa2	Control	1	11_5	Rep1_11_5	288.263	1.03989	1.04844
NFKB2	48	350	5.83333	MIA PaCa2	Control	1	11_5	Rep1_11_5	293.097	1.04792	1.04536
NFKB2	49	360	6	MIA PaCa2	Control	1	11_5	Rep1_11_5	293.345	1.05824	1.04116
NFKB2	50	370	6.16667	MIA PaCa2	Control	1	11_5	Rep1_11_5	290.541	1.03872	1.04399
NFKB2	51	380	6.33333	MIA PaCa2	Control	1	11_5	Rep1_11_5	292.136	1.04134	1.04498
NFKB2	52	390	6.5	MIA PaCa2	Control	1	11_5	Rep1_11_5	293.488	1.03613	1.04513
NFKB2	53	400	6.66667	MIA PaCa2	Control	1	11_5	Rep1_11_5	296.712	1.0457	1.04228
NFKB2	54	410	6.83333	MIA PaCa2	Control	1	11_5	Rep1_11_5	298.575	1.04681	1.04425
NFKB2	55	420	7	MIA PaCa2	Control	1	11_5	Rep1_11_5	295.426	1.04898	1.04431
NFKB2	56	430	7.16667	MIA PaCa2	Control	1	11_5	Rep1_11_5	294.694	1.03829	1.04375
NFKB2	57	440	7.33333	MIA PaCa2	Control	1	11_5	Rep1_11_5	298.854	1.0525	1.04131
NFKB2	58	450	7.5	MIA PaCa2	Control	1	11_5	Rep1_11_5	295.223	1.04173	1.04081
NFKB2	59	460	7.66667	MIA PaCa2	Control	1	11_5	Rep1_11_5	292.002	1.03225	1.04159
NFKB2	60	470	7.83333	MIA PaCa2	Control	1	11_5	Rep1_11_5	292.808	1.02861	1.04283
NFKB2	61	480	8	MIA PaCa2	Control	1	11_5	Rep1_11_5	297.296	1.04328	1.03923
NFKB2	62	490	8.16667	MIA PaCa2	Control	1	11_5	Rep1_11_5	298.625	1.05448	1.03905
NFKB2	63	500	8.33333	MIA PaCa2	Control	1	11_5	Rep1_11_5	298.36	1.04696	1.03916
NFKB2	64	510	8.5	MIA PaCa2	Control	1	11_5	Rep1_11_5	293.57	1.02732	1.0405
NFKB2	65	520	8.66667	MIA PaCa2	Control	1	11_5	Rep1_11_5	297.2	1.04048	1.03761
NFKB2	66	530	8.83333	MIA PaCa2	Control	1	11_5	Rep1_11_5	295.195	1.03302	1.03669
NFKB2	67	540	9	MIA PaCa2	Control	1	11_5	Rep1_11_5	297.836	1.03795	1.03683
NFKB2	68	550	9.16667	MIA PaCa2	Control	1	11_5	Rep1_11_5	292.491	1.02307	1.04384
NFKB2	69	560	9.33333	MIA PaCa2	Control	1	11_5	Rep1_11_5	298.805	1.04803	1.0452
NFKB2	70	570	9.5	MIA PaCa2	Control	1	11_5	Rep1_11_5	299.694	1.04795	1.04532
NFKB2	71	580	9.66667	MIA PaCa2	Control	1	11_5	Rep1_11_5	306.3	1.07635	1.04373
NFKB2	72	590	9.83333	MIA PaCa2	Control	1	11_5	Rep1_11_5	304.495	1.05003	1.04434
NFKB2	73	600	10	MIA PaCa2	Control	1	11_5	Rep1_11_5	298.993	1.03388	1.04192
NFKB2	74	610	10.1667	MIA PaCa2	Control	1	11_5	Rep1_11_5	300.456	1.02681	1.04552
NFKB2	75	620	10.3333	MIA PaCa2	Control	1	11_5	Rep1_11_5	297.89	1.02732	1.0416
NFKB2	76	630	10.5	MIA PaCa2	Control	1	11_5	Rep1_11_5	299.715	1.0311	1.04085
NFKB2	77	640	10.6667	MIA PaCa2	Control	1	11_5	Rep1_11_5	309.962	1.07313	1.04264
NFKB2	78	650	10.8333	MIA PaCa2	Control	1	11_5	Rep1_11_5	303.915	1.04893	1.04677
NFKB2	79	660	11	MIA PaCa2	Control	1	11_5	Rep1_11_5	302.274	1.04475	1.04994
NFKB2	80	670	11.1667	MIA PaCa2	Control	1	11_5	Rep1_11_5	301.839	1.04646	1.05123
NFKB2	81	680	11.3333	MIA PaCa2	Control	1	11_5	Rep1_11_5	305.884	1.05571	1.04935
NFKB2	82	690	11.5	MIA PaCa2	Control	1	11_5	Rep1_11_5	304.069	1.04948	1.04994
NFKB2	83	700	11.6667	MIA PaCa2	Control	1	11_5	Rep1_11_5	300.305	1.04019	1.04769
NFKB2	84	710	11.8333	MIA PaCa2	Control	1	11_5	Rep1_11_5	303.858	1.05993	1.04601
NFKB2	85	720	12	MIA PaCa2	Control	1	11_5	Rep1_11_5	303.448	1.05307	1.04433
NFKB2	86	730	12.1667	MIA PaCa2	Control	1	11_5	Rep1_11_5	299.27	1.02903	1.04265
NFKB2	1	-120	-2	MIA PaCa2	TNF	1	11_9	Rep1_11_9	337.835	1.09259	1.09543
NFKB2	2	-110	-1.83333	MIA PaCa2	TNF	1	11_9	Rep1_11_9	325.93	1.08423	1.07846
NFKB2	3	-100	-1.66667	MIA PaCa2	TNF	1	11_9	Rep1_11_9	314.033	1.04704	1.06148
NFKB2	4	-90	-1.5	MIA PaCa2	TNF	1	11_9	Rep1_11_9	311.753	1.06236	1.04451
NFKB2	5	-80	-1.33333	MIA PaCa2	TNF	1	11_9	Rep1_11_9	299.473	1.0167	1.02688
NFKB2	6	-70	-1.16667	MIA PaCa2	TNF	1	11_9	Rep1_11_9	297.113	1.02465	1.01277
NFKB2	7	-60	-1	MIA PaCa2	TNF	1	11_9	Rep1_11_9	286.933	0.984004	1.00536
NFKB2	8	-50	-0.833333	MIA PaCa2	TNF	1	11_9	Rep1_11_9	279.509	0.969166	0.997147
NFKB2	9	-40	-0.666667	MIA PaCa2	TNF	1	11_9	Rep1_11_9	282.954	0.985468	0.993938
NFKB2	10	-30	-0.5	MIA PaCa2	TNF	1	11_9	Rep1_11_9	283.415	0.995166	0.989635
NFKB2	11	-20	-0.333333	MIA PaCa2	TNF	1	11_9	Rep1_11_9	287.533	1.00487	1.0814
NFKB2	12	-10	-0.166667	MIA PaCa2	TNF	1	11_9	Rep1_11_9	282.066	0.994235	1.17587
NFKB2	13	0	0	MIA PaCa2	TNF	1	11_9	Rep1_11_9	281.743	0.994536	1.26694
NFKB2	14	10	0.166667	MIA PaCa2	TNF	1	11_9	Rep1_11_9	452.125	1.62633	1.35776
NFKB2	15	20	0.333333	MIA PaCa2	TNF	1	11_9	Rep1_11_9	459.423	1.63047	1.44698
NFKB2	16	30	0.5	MIA PaCa2	TNF	1	11_9	Rep1_11_9	453.85	1.623	1.53513
NFKB2	17	40	0.666667	MIA PaCa2	TNF	1	11_9	Rep1_11_9	456.694	1.63085	1.62322
NFKB2	18	50	0.833333	MIA PaCa2	TNF	1	11_9	Rep1_11_9	452.777	1.62943	1.62005
NFKB2	19	60	1	MIA PaCa2	TNF	1	11_9	Rep1_11_9	447.81	1.61133	1.61202
NFKB2	20	70	1.16667	MIA PaCa2	TNF	1	11_9	Rep1_11_9	445.36	1.61111	1.60677
NFKB2	21	80	1.33333	MIA PaCa2	TNF	1	11_9	Rep1_11_9	443.62	1.60413	1.59632
NFKB2	22	90	1.5	MIA PaCa2	TNF	1	11_9	Rep1_11_9	439.496	1.57426	1.58472
NFKB2	23	100	1.66667	MIA PaCa2	TNF	1	11_9	Rep1_11_9	437.446	1.58628	1.57538
NFKB2	24	110	1.83333	MIA PaCa2	TNF	1	11_9	Rep1_11_9	432.134	1.55767	1.56774
NFKB2	25	120	2	MIA PaCa2	TNF	1	11_9	Rep1_11_9	430.16	1.54824	1.55957
NFKB2	26	130	2.16667	MIA PaCa2	TNF	1	11_9	Rep1_11_9	428.767	1.54593	1.55299
NFKB2	27	140	2.33333	MIA PaCa2	TNF	1	11_9	Rep1_11_9	431.624	1.55765	1.54576
NFKB2	28	150	2.5	MIA PaCa2	TNF	1	11_9	Rep1_11_9	426.725	1.54694	1.53799
NFKB2	29	160	2.66667	MIA PaCa2	TNF	1	11_9	Rep1_11_9	422.298	1.52821	1.5314
NFKB2	30	170	2.83333	MIA PaCa2	TNF	1	11_9	Rep1_11_9	423.063	1.53569	1.5248
NFKB2	31	180	3	MIA PaCa2	TNF	1	11_9	Rep1_11_9	416.086	1.50331	1.515
NFKB2	32	190	3.16667	MIA PaCa2	TNF	1	11_9	Rep1_11_9	416.491	1.50207	1.50443
NFKB2	33	200	3.33333	MIA PaCa2	TNF	1	11_9	Rep1_11_9	415.289	1.49975	1.49751
NFKB2	34	210	3.5	MIA PaCa2	TNF	1	11_9	Rep1_11_9	414.013	1.48906	1.48835
NFKB2	35	220	3.66667	MIA PaCa2	TNF	1	11_9	Rep1_11_9	406.781	1.47291	1.47739
NFKB2	36	230	3.83333	MIA PaCa2	TNF	1	11_9	Rep1_11_9	407.031	1.47976	1.46756
NFKB2	37	240	4	MIA PaCa2	TNF	1	11_9	Rep1_11_9	403.044	1.47156	1.45618
NFKB2	38	250	4.16667	MIA PaCa2	TNF	1	11_9	Rep1_11_9	398.131	1.42664	1.44476
NFKB2	39	260	4.33333	MIA PaCa2	TNF	1	11_9	Rep1_11_9	397.999	1.43324	1.43779
NFKB2	40	270	4.5	MIA PaCa2	TNF	1	11_9	Rep1_11_9	393.355	1.42009	1.42643
NFKB2	41	280	4.66667	MIA PaCa2	TNF	1	11_9	Rep1_11_9	390.847	1.40911	1.41385
NFKB2	42	290	4.83333	MIA PaCa2	TNF	1	11_9	Rep1_11_9	392.663	1.42412	1.41103
NFKB2	43	300	5	MIA PaCa2	TNF	1	11_9	Rep1_11_9	384.958	1.40026	1.40293
NFKB2	44	310	5.16667	MIA PaCa2	TNF	1	11_9	Rep1_11_9	385.365	1.38353	1.40058
NFKB2	45	320	5.33333	MIA PaCa2	TNF	1	11_9	Rep1_11_9	386.948	1.40685	1.39647
NFKB2	46	330	5.5	MIA PaCa2	TNF	1	11_9	Rep1_11_9	384.258	1.37656	1.3919
NFKB2	47	340	5.66667	MIA PaCa2	TNF	1	11_9	Rep1_11_9	389.097	1.40365	1.38531
NFKB2	48	350	5.83333	MIA PaCa2	TNF	1	11_9	Rep1_11_9	386.074	1.38035	1.38109
NFKB2	49	360	6	MIA PaCa2	TNF	1	11_9	Rep1_11_9	385.898	1.39213	1.37146
NFKB2	50	370	6.16667	MIA PaCa2	TNF	1	11_9	Rep1_11_9	378.747	1.35406	1.36583
NFKB2	51	380	6.33333	MIA PaCa2	TNF	1	11_9	Rep1_11_9	379.851	1.354	1.35504
NFKB2	52	390	6.5	MIA PaCa2	TNF	1	11_9	Rep1_11_9	379.42	1.3395	1.34968
NFKB2	53	400	6.66667	MIA PaCa2	TNF	1	11_9	Rep1_11_9	379.392	1.33709	1.342
NFKB2	54	410	6.83333	MIA PaCa2	TNF	1	11_9	Rep1_11_9	378.81	1.32811	1.33715
NFKB2	55	420	7	MIA PaCa2	TNF	1	11_9	Rep1_11_9	378.186	1.34284	1.33088
NFKB2	56	430	7.16667	MIA PaCa2	TNF	1	11_9	Rep1_11_9	379.858	1.33835	1.32554
NFKB2	57	440	7.33333	MIA PaCa2	TNF	1	11_9	Rep1_11_9	374.857	1.32016	1.32058
NFKB2	58	450	7.5	MIA PaCa2	TNF	1	11_9	Rep1_11_9	371.287	1.31013	1.31771
NFKB2	59	460	7.66667	MIA PaCa2	TNF	1	11_9	Rep1_11_9	368.34	1.30211	1.31199
NFKB2	60	470	7.83333	MIA PaCa2	TNF	1	11_9	Rep1_11_9	370.727	1.30233	1.30873
NFKB2	61	480	8	MIA PaCa2	TNF	1	11_9	Rep1_11_9	372.752	1.30808	1.30424
NFKB2	62	490	8.16667	MIA PaCa2	TNF	1	11_9	Rep1_11_9	368.945	1.30279	1.29971
NFKB2	63	500	8.33333	MIA PaCa2	TNF	1	11_9	Rep1_11_9	374.89	1.31551	1.29631
NFKB2	64	510	8.5	MIA PaCa2	TNF	1	11_9	Rep1_11_9	368.273	1.28874	1.29283
NFKB2	65	520	8.66667	MIA PaCa2	TNF	1	11_9	Rep1_11_9	365.158	1.27839	1.28992
NFKB2	66	530	8.83333	MIA PaCa2	TNF	1	11_9	Rep1_11_9	365.29	1.27831	1.29037
NFKB2	67	540	9	MIA PaCa2	TNF	1	11_9	Rep1_11_9	366.709	1.27797	1.28779
NFKB2	68	550	9.16667	MIA PaCa2	TNF	1	11_9	Rep1_11_9	368.158	1.28774	1.28774
NFKB2	69	560	9.33333	MIA PaCa2	TNF	1	11_9	Rep1_11_9	372.339	1.30595	1.28242
NFKB2	70	570	9.5	MIA PaCa2	TNF	1	11_9	Rep1_11_9	371.043	1.29744	1.27978
NFKB2	71	580	9.66667	MIA PaCa2	TNF	1	11_9	Rep1_11_9	366.634	1.28837	1.27545
NFKB2	72	590	9.83333	MIA PaCa2	TNF	1	11_9	Rep1_11_9	359.922	1.24117	1.26801
NFKB2	73	600	10	MIA PaCa2	TNF	1	11_9	Rep1_11_9	364.331	1.25981	1.2607
NFKB2	74	610	10.1667	MIA PaCa2	TNF	1	11_9	Rep1_11_9	365.086	1.24768	1.26026
NFKB2	75	620	10.3333	MIA PaCa2	TNF	1	11_9	Rep1_11_9	358.301	1.23565	1.2568
NFKB2	76	630	10.5	MIA PaCa2	TNF	1	11_9	Rep1_11_9	364.728	1.25476	1.26215
NFKB2	77	640	10.6667	MIA PaCa2	TNF	1	11_9	Rep1_11_9	373.865	1.29437	1.25832
NFKB2	78	650	10.8333	MIA PaCa2	TNF	1	11_9	Rep1_11_9	366.281	1.26418	1.25723
NFKB2	79	660	11	MIA PaCa2	TNF	1	11_9	Rep1_11_9	369.926	1.27858	1.2573
NFKB2	80	670	11.1667	MIA PaCa2	TNF	1	11_9	Rep1_11_9	355.661	1.23305	1.2577
NFKB2	81	680	11.3333	MIA PaCa2	TNF	1	11_9	Rep1_11_9	359.279	1.23999	1.24987
NFKB2	82	690	11.5	MIA PaCa2	TNF	1	11_9	Rep1_11_9	358.162	1.23617	1.24627
NFKB2	83	700	11.6667	MIA PaCa2	TNF	1	11_9	Rep1_11_9	363.064	1.25757	1.23968
NFKB2	84	710	11.8333	MIA PaCa2	TNF	1	11_9	Rep1_11_9	355.355	1.23956	1.23966
NFKB2	85	720	12	MIA PaCa2	TNF	1	11_9	Rep1_11_9	357.005	1.23894	1.23964
NFKB2	86	730	12.1667	MIA PaCa2	TNF	1	11_9	Rep1_11_9	358.428	1.23244	1.23962
NFKBIA	1	-120	-2	MIA PaCa2	TNF	1	6_10	Rep1_6_10	317.938	1.02824	1.04196
NFKBIA	2	-110	-1.83333	MIA PaCa2	TNF	1	6_10	Rep1_6_10	321.727	1.07025	1.04876
NFKBIA	3	-100	-1.66667	MIA PaCa2	TNF	1	6_10	Rep1_6_10	313.47	1.04516	1.05556
NFKBIA	4	-90	-1.5	MIA PaCa2	TNF	1	6_10	Rep1_6_10	312.571	1.06515	1.06237
NFKBIA	5	-80	-1.33333	MIA PaCa2	TNF	1	6_10	Rep1_6_10	313.717	1.06505	1.06987
NFKBIA	6	-70	-1.16667	MIA PaCa2	TNF	1	6_10	Rep1_6_10	316.741	1.09235	1.06844
NFKBIA	7	-60	-1	MIA PaCa2	TNF	1	6_10	Rep1_6_10	312.119	1.07037	1.07381
NFKBIA	8	-50	-0.833333	MIA PaCa2	TNF	1	6_10	Rep1_6_10	311.684	1.08073	1.07497
NFKBIA	9	-40	-0.666667	MIA PaCa2	TNF	1	6_10	Rep1_6_10	304.431	1.06027	1.07495
NFKBIA	10	-30	-0.5	MIA PaCa2	TNF	1	6_10	Rep1_6_10	308.356	1.08274	1.0728
NFKBIA	11	-20	-0.333333	MIA PaCa2	TNF	1	6_10	Rep1_6_10	307.106	1.07328	1.14706
NFKBIA	12	-10	-0.166667	MIA PaCa2	TNF	1	6_10	Rep1_6_10	302.121	1.06493	1.22345
NFKBIA	13	0	0	MIA PaCa2	TNF	1	6_10	Rep1_6_10	305.178	1.07726	1.30509
NFKBIA	14	10	0.166667	MIA PaCa2	TNF	1	6_10	Rep1_6_10	442.09	1.59023	1.38235
NFKBIA	15	20	0.333333	MIA PaCa2	TNF	1	6_10	Rep1_6_10	455.192	1.61546	1.46432
NFKBIA	16	30	0.5	MIA PaCa2	TNF	1	6_10	Rep1_6_10	456.298	1.63176	1.54647
NFKBIA	17	40	0.666667	MIA PaCa2	TNF	1	6_10	Rep1_6_10	454.654	1.62357	1.62973
NFKBIA	18	50	0.833333	MIA PaCa2	TNF	1	6_10	Rep1_6_10	457.664	1.64702	1.63728
NFKBIA	19	60	1	MIA PaCa2	TNF	1	6_10	Rep1_6_10	455.778	1.64	1.63877
NFKBIA	20	70	1.16667	MIA PaCa2	TNF	1	6_10	Rep1_6_10	458.903	1.66011	1.64036
NFKBIA	21	80	1.33333	MIA PaCa2	TNF	1	6_10	Rep1_6_10	454.382	1.64305	1.6398
NFKBIA	22	90	1.5	MIA PaCa2	TNF	1	6_10	Rep1_6_10	453.912	1.6259	1.63704
NFKBIA	23	100	1.66667	MIA PaCa2	TNF	1	6_10	Rep1_6_10	453.046	1.64285	1.63485
NFKBIA	24	110	1.83333	MIA PaCa2	TNF	1	6_10	Rep1_6_10	449.341	1.61969	1.63018
NFKBIA	25	120	2	MIA PaCa2	TNF	1	6_10	Rep1_6_10	452.228	1.62767	1.62915
NFKBIA	26	130	2.16667	MIA PaCa2	TNF	1	6_10	Rep1_6_10	450.601	1.62465	1.62853
NFKBIA	27	140	2.33333	MIA PaCa2	TNF	1	6_10	Rep1_6_10	450.964	1.62745	1.624
NFKBIA	28	150	2.5	MIA PaCa2	TNF	1	6_10	Rep1_6_10	451.253	1.63585	1.62087
NFKBIA	29	160	2.66667	MIA PaCa2	TNF	1	6_10	Rep1_6_10	448.088	1.62154	1.61611
NFKBIA	30	170	2.83333	MIA PaCa2	TNF	1	6_10	Rep1_6_10	443.856	1.61117	1.61105
NFKBIA	31	180	3	MIA PaCa2	TNF	1	6_10	Rep1_6_10	442.22	1.59773	1.60401
NFKBIA	32	190	3.16667	MIA PaCa2	TNF	1	6_10	Rep1_6_10	442.087	1.59438	1.59727
NFKBIA	33	200	3.33333	MIA PaCa2	TNF	1	6_10	Rep1_6_10	440.06	1.58921	1.59305
NFKBIA	34	210	3.5	MIA PaCa2	TNF	1	6_10	Rep1_6_10	438.803	1.57822	1.59013
NFKBIA	35	220	3.66667	MIA PaCa2	TNF	1	6_10	Rep1_6_10	438.736	1.58862	1.58396
NFKBIA	36	230	3.83333	MIA PaCa2	TNF	1	6_10	Rep1_6_10	437.911	1.59202	1.58232
NFKBIA	37	240	4	MIA PaCa2	TNF	1	6_10	Rep1_6_10	435.686	1.59074	1.57728
NFKBIA	38	250	4.16667	MIA PaCa2	TNF	1	6_10	Rep1_6_10	433.817	1.55451	1.57546
NFKBIA	39	260	4.33333	MIA PaCa2	TNF	1	6_10	Rep1_6_10	439.57	1.58294	1.57158
NFKBIA	40	270	4.5	MIA PaCa2	TNF	1	6_10	Rep1_6_10	430.425	1.55392	1.56715
NFKBIA	41	280	4.66667	MIA PaCa2	TNF	1	6_10	Rep1_6_10	434.208	1.56544	1.56151
NFKBIA	42	290	4.83333	MIA PaCa2	TNF	1	6_10	Rep1_6_10	430.546	1.56151	1.5617
NFKBIA	43	300	5	MIA PaCa2	TNF	1	6_10	Rep1_6_10	429.149	1.561	1.55543
NFKBIA	44	310	5.16667	MIA PaCa2	TNF	1	6_10	Rep1_6_10	432.086	1.55127	1.55395
NFKBIA	45	320	5.33333	MIA PaCa2	TNF	1	6_10	Rep1_6_10	427.929	1.55585	1.54762
NFKBIA	46	330	5.5	MIA PaCa2	TNF	1	6_10	Rep1_6_10	429.615	1.53905	1.54337
NFKBIA	47	340	5.66667	MIA PaCa2	TNF	1	6_10	Rep1_6_10	427.869	1.54352	1.53322
NFKBIA	48	350	5.83333	MIA PaCa2	TNF	1	6_10	Rep1_6_10	425.463	1.52117	1.5236
NFKBIA	49	360	6	MIA PaCa2	TNF	1	6_10	Rep1_6_10	424.589	1.5317	1.51502
NFKBIA	50	370	6.16667	MIA PaCa2	TNF	1	6_10	Rep1_6_10	416.756	1.48995	1.50433
NFKBIA	51	380	6.33333	MIA PaCa2	TNF	1	6_10	Rep1_6_10	416.311	1.48397	1.49214
NFKBIA	52	390	6.5	MIA PaCa2	TNF	1	6_10	Rep1_6_10	423.693	1.4958	1.48539
NFKBIA	53	400	6.66667	MIA PaCa2	TNF	1	6_10	Rep1_6_10	415.464	1.46422	1.47377
NFKBIA	54	410	6.83333	MIA PaCa2	TNF	1	6_10	Rep1_6_10	415.895	1.45813	1.46648
NFKBIA	55	420	7	MIA PaCa2	TNF	1	6_10	Rep1_6_10	415.102	1.47392	1.45854
NFKBIA	56	430	7.16667	MIA PaCa2	TNF	1	6_10	Rep1_6_10	411.661	1.45041	1.44872
NFKBIA	57	440	7.33333	MIA PaCa2	TNF	1	6_10	Rep1_6_10	408.569	1.43889	1.44333
NFKBIA	58	450	7.5	MIA PaCa2	TNF	1	6_10	Rep1_6_10	404.804	1.4284	1.43795
NFKBIA	59	460	7.66667	MIA PaCa2	TNF	1	6_10	Rep1_6_10	403.687	1.42707	1.42976
NFKBIA	60	470	7.83333	MIA PaCa2	TNF	1	6_10	Rep1_6_10	406.07	1.42648	1.42587
NFKBIA	61	480	8	MIA PaCa2	TNF	1	6_10	Rep1_6_10	404.783	1.42048	1.42159
NFKBIA	62	490	8.16667	MIA PaCa2	TNF	1	6_10	Rep1_6_10	401.175	1.4166	1.41652
NFKBIA	63	500	8.33333	MIA PaCa2	TNF	1	6_10	Rep1_6_10	405.562	1.42314	1.41106
NFKBIA	64	510	8.5	MIA PaCa2	TNF	1	6_10	Rep1_6_10	402.629	1.40897	1.40256
NFKBIA	65	520	8.66667	MIA PaCa2	TNF	1	6_10	Rep1_6_10	397.856	1.39287	1.39355
NFKBIA	66	530	8.83333	MIA PaCa2	TNF	1	6_10	Rep1_6_10	396.887	1.38888	1.38557
NFKBIA	67	540	9	MIA PaCa2	TNF	1	6_10	Rep1_6_10	392.261	1.36701	1.37504
NFKBIA	68	550	9.16667	MIA PaCa2	TNF	1	6_10	Rep1_6_10	388.061	1.35736	1.36292
NFKBIA	69	560	9.33333	MIA PaCa2	TNF	1	6_10	Rep1_6_10	387.967	1.36076	1.34987
NFKBIA	70	570	9.5	MIA PaCa2	TNF	1	6_10	Rep1_6_10	385.914	1.34944	1.33776
NFKBIA	71	580	9.66667	MIA PaCa2	TNF	1	6_10	Rep1_6_10	376.8	1.32409	1.32634
NFKBIA	72	590	9.83333	MIA PaCa2	TNF	1	6_10	Rep1_6_10	377.437	1.30157	1.31698
NFKBIA	73	600	10	MIA PaCa2	TNF	1	6_10	Rep1_6_10	377.128	1.30406	1.30627
NFKBIA	74	610	10.1667	MIA PaCa2	TNF	1	6_10	Rep1_6_10	376.624	1.28711	1.29451
NFKBIA	75	620	10.3333	MIA PaCa2	TNF	1	6_10	Rep1_6_10	374.591	1.29184	1.28543
NFKBIA	76	630	10.5	MIA PaCa2	TNF	1	6_10	Rep1_6_10	373.753	1.28581	1.28169
NFKBIA	77	640	10.6667	MIA PaCa2	TNF	1	6_10	Rep1_6_10	365.996	1.26712	1.27531
NFKBIA	78	650	10.8333	MIA PaCa2	TNF	1	6_10	Rep1_6_10	365.204	1.26046	1.26884
NFKBIA	79	660	11	MIA PaCa2	TNF	1	6_10	Rep1_6_10	369.003	1.27539	1.26531
NFKBIA	80	670	11.1667	MIA PaCa2	TNF	1	6_10	Rep1_6_10	363.262	1.25941	1.26181
NFKBIA	81	680	11.3333	MIA PaCa2	TNF	1	6_10	Rep1_6_10	359.828	1.24189	1.26454
NFKBIA	82	690	11.5	MIA PaCa2	TNF	1	6_10	Rep1_6_10	367.113	1.26707	1.26333
NFKBIA	83	700	11.6667	MIA PaCa2	TNF	1	6_10	Rep1_6_10	364.155	1.26135	1.25776
NFKBIA	84	710	11.8333	MIA PaCa2	TNF	1	6_10	Rep1_6_10	368.737	1.28624	1.2567
NFKBIA	85	720	12	MIA PaCa2	TNF	1	6_10	Rep1_6_10	360.754	1.25195	1.25563
NFKBIA	86	730	12.1667	MIA PaCa2	TNF	1	6_10	Rep1_6_10	359.579	1.2364	1.25457
NFKBIA	1	-120	-2	MIA PaCa2	TNF	1	6_11	Rep1_6_11	328.143	1.06124	1.06963
NFKBIA	2	-110	-1.83333	MIA PaCa2	TNF	1	6_11	Rep1_6_11	327.346	1.08894	1.07394
NFKBIA	3	-100	-1.66667	MIA PaCa2	TNF	1	6_11	Rep1_6_11	319.143	1.06407	1.07826
NFKBIA	4	-90	-1.5	MIA PaCa2	TNF	1	6_11	Rep1_6_11	318.957	1.08691	1.08258
NFKBIA	5	-80	-1.33333	MIA PaCa2	TNF	1	6_11	Rep1_6_11	320.108	1.08675	1.08711
NFKBIA	6	-70	-1.16667	MIA PaCa2	TNF	1	6_11	Rep1_6_11	322.021	1.11056	1.08623
NFKBIA	7	-60	-1	MIA PaCa2	TNF	1	6_11	Rep1_6_11	314.796	1.07955	1.08898
NFKBIA	8	-50	-0.833333	MIA PaCa2	TNF	1	6_11	Rep1_6_11	315.214	1.09297	1.0858
NFKBIA	9	-40	-0.666667	MIA PaCa2	TNF	1	6_11	Rep1_6_11	310.897	1.08279	1.08157
NFKBIA	10	-30	-0.5	MIA PaCa2	TNF	1	6_11	Rep1_6_11	308.518	1.08331	1.0781
NFKBIA	11	-20	-0.333333	MIA PaCa2	TNF	1	6_11	Rep1_6_11	304.648	1.06469	1.15582
NFKBIA	12	-10	-0.166667	MIA PaCa2	TNF	1	6_11	Rep1_6_11	299.913	1.05714	1.23611
NFKBIA	13	0	0	MIA PaCa2	TNF	1	6_11	Rep1_6_11	307.727	1.08626	1.3185
NFKBIA	14	10	0.166667	MIA PaCa2	TNF	1	6_11	Rep1_6_11	451.358	1.62357	1.39919
NFKBIA	15	20	0.333333	MIA PaCa2	TNF	1	6_11	Rep1_6_11	466.348	1.65505	1.48358
NFKBIA	16	30	0.5	MIA PaCa2	TNF	1	6_11	Rep1_6_11	464.056	1.6595	1.56771
NFKBIA	17	40	0.666667	MIA PaCa2	TNF	1	6_11	Rep1_6_11	461.527	1.64811	1.64978
NFKBIA	18	50	0.833333	MIA PaCa2	TNF	1	6_11	Rep1_6_11	460.005	1.65544	1.65114
NFKBIA	19	60	1	MIA PaCa2	TNF	1	6_11	Rep1_6_11	457.447	1.64601	1.64592
NFKBIA	20	70	1.16667	MIA PaCa2	TNF	1	6_11	Rep1_6_11	459.096	1.66081	1.64278
NFKBIA	21	80	1.33333	MIA PaCa2	TNF	1	6_11	Rep1_6_11	451.625	1.63308	1.64171
NFKBIA	22	90	1.5	MIA PaCa2	TNF	1	6_11	Rep1_6_11	451.85	1.61852	1.63736
NFKBIA	23	100	1.66667	MIA PaCa2	TNF	1	6_11	Rep1_6_11	451.562	1.63747	1.63425
NFKBIA	24	110	1.83333	MIA PaCa2	TNF	1	6_11	Rep1_6_11	455.151	1.64064	1.6271
NFKBIA	25	120	2	MIA PaCa2	TNF	1	6_11	Rep1_6_11	451.495	1.62503	1.62459
NFKBIA	26	130	2.16667	MIA PaCa2	TNF	1	6_11	Rep1_6_11	450.476	1.6242	1.62502
NFKBIA	27	140	2.33333	MIA PaCa2	TNF	1	6_11	Rep1_6_11	446.337	1.61075	1.62375
NFKBIA	28	150	2.5	MIA PaCa2	TNF	1	6_11	Rep1_6_11	445.641	1.61551	1.61977
NFKBIA	29	160	2.66667	MIA PaCa2	TNF	1	6_11	Rep1_6_11	448.095	1.62156	1.61637
NFKBIA	30	170	2.83333	MIA PaCa2	TNF	1	6_11	Rep1_6_11	448.644	1.62855	1.61106
NFKBIA	31	180	3	MIA PaCa2	TNF	1	6_11	Rep1_6_11	446.393	1.61281	1.60793
NFKBIA	32	190	3.16667	MIA PaCa2	TNF	1	6_11	Rep1_6_11	443.986	1.60123	1.60399
NFKBIA	33	200	3.33333	MIA PaCa2	TNF	1	6_11	Rep1_6_11	439.447	1.58699	1.60168
NFKBIA	34	210	3.5	MIA PaCa2	TNF	1	6_11	Rep1_6_11	441.765	1.58888	1.59909
NFKBIA	35	220	3.66667	MIA PaCa2	TNF	1	6_11	Rep1_6_11	438.55	1.58794	1.59491
NFKBIA	36	230	3.83333	MIA PaCa2	TNF	1	6_11	Rep1_6_11	441.581	1.60536	1.59494
NFKBIA	37	240	4	MIA PaCa2	TNF	1	6_11	Rep1_6_11	441.076	1.61042	1.59368
NFKBIA	38	250	4.16667	MIA PaCa2	TNF	1	6_11	Rep1_6_11	441.919	1.58354	1.59329
NFKBIA	39	260	4.33333	MIA PaCa2	TNF	1	6_11	Rep1_6_11	444.712	1.60146	1.59459
NFKBIA	40	270	4.5	MIA PaCa2	TNF	1	6_11	Rep1_6_11	437.138	1.57816	1.59206
NFKBIA	41	280	4.66667	MIA PaCa2	TNF	1	6_11	Rep1_6_11	439.949	1.58613	1.5854
NFKBIA	42	290	4.83333	MIA PaCa2	TNF	1	6_11	Rep1_6_11	440.337	1.59703	1.58294
NFKBIA	43	300	5	MIA PaCa2	TNF	1	6_11	Rep1_6_11	436.479	1.58766	1.57668
NFKBIA	44	310	5.16667	MIA PaCa2	TNF	1	6_11	Rep1_6_11	435.572	1.56379	1.57585
NFKBIA	45	320	5.33333	MIA PaCa2	TNF	1	6_11	Rep1_6_11	430.824	1.56637	1.56816
NFKBIA	46	330	5.5	MIA PaCa2	TNF	1	6_11	Rep1_6_11	434.79	1.55759	1.56137
NFKBIA	47	340	5.66667	MIA PaCa2	TNF	1	6_11	Rep1_6_11	435.865	1.57236	1.54923
NFKBIA	48	350	5.83333	MIA PaCa2	TNF	1	6_11	Rep1_6_11	428.574	1.5323	1.54235
NFKBIA	49	360	6	MIA PaCa2	TNF	1	6_11	Rep1_6_11	429.524	1.54951	1.52766
NFKBIA	50	370	6.16667	MIA PaCa2	TNF	1	6_11	Rep1_6_11	420.319	1.50269	1.51979
NFKBIA	51	380	6.33333	MIA PaCa2	TNF	1	6_11	Rep1_6_11	425.189	1.51561	1.50623
NFKBIA	52	390	6.5	MIA PaCa2	TNF	1	6_11	Rep1_6_11	414.57	1.46359	1.5
NFKBIA	53	400	6.66667	MIA PaCa2	TNF	1	6_11	Rep1_6_11	426.322	1.50249	1.48856
NFKBIA	54	410	6.83333	MIA PaCa2	TNF	1	6_11	Rep1_6_11	421.398	1.47743	1.48173
NFKBIA	55	420	7	MIA PaCa2	TNF	1	6_11	Rep1_6_11	419.259	1.48868	1.47086
NFKBIA	56	430	7.16667	MIA PaCa2	TNF	1	6_11	Rep1_6_11	417.066	1.46945	1.46826
NFKBIA	57	440	7.33333	MIA PaCa2	TNF	1	6_11	Rep1_6_11	413.112	1.45489	1.45892
NFKBIA	58	450	7.5	MIA PaCa2	TNF	1	6_11	Rep1_6_11	407.946	1.43948	1.45442
NFKBIA	59	460	7.66667	MIA PaCa2	TNF	1	6_11	Rep1_6_11	408.875	1.44541	1.44484
NFKBIA	60	470	7.83333	MIA PaCa2	TNF	1	6_11	Rep1_6_11	409.089	1.43709	1.43527
NFKBIA	61	480	8	MIA PaCa2	TNF	1	6_11	Rep1_6_11	412.045	1.44597	1.42995
NFKBIA	62	490	8.16667	MIA PaCa2	TNF	1	6_11	Rep1_6_11	402.59	1.42159	1.42783
NFKBIA	63	500	8.33333	MIA PaCa2	TNF	1	6_11	Rep1_6_11	399.661	1.40243	1.42286
NFKBIA	64	510	8.5	MIA PaCa2	TNF	1	6_11	Rep1_6_11	405.117	1.41767	1.41495
NFKBIA	65	520	8.66667	MIA PaCa2	TNF	1	6_11	Rep1_6_11	406.93	1.42463	1.40752
NFKBIA	66	530	8.83333	MIA PaCa2	TNF	1	6_11	Rep1_6_11	403.098	1.41062	1.40395
NFKBIA	67	540	9	MIA PaCa2	TNF	1	6_11	Rep1_6_11	396.475	1.3817	1.40181
NFKBIA	68	550	9.16667	MIA PaCa2	TNF	1	6_11	Rep1_6_11	398.539	1.39401	1.39541
NFKBIA	69	560	9.33333	MIA PaCa2	TNF	1	6_11	Rep1_6_11	398.175	1.39656	1.38276
NFKBIA	70	570	9.5	MIA PaCa2	TNF	1	6_11	Rep1_6_11	396.792	1.38748	1.37121
NFKBIA	71	580	9.66667	MIA PaCa2	TNF	1	6_11	Rep1_6_11	390.679	1.37286	1.36233
NFKBIA	72	590	9.83333	MIA PaCa2	TNF	1	6_11	Rep1_6_11	387.458	1.33612	1.35384
NFKBIA	73	600	10	MIA PaCa2	TNF	1	6_11	Rep1_6_11	384.544	1.32971	1.34294
NFKBIA	74	610	10.1667	MIA PaCa2	TNF	1	6_11	Rep1_6_11	386.113	1.31954	1.33192
NFKBIA	75	620	10.3333	MIA PaCa2	TNF	1	6_11	Rep1_6_11	386.997	1.33462	1.32433
NFKBIA	76	630	10.5	MIA PaCa2	TNF	1	6_11	Rep1_6_11	383.769	1.32027	1.32152
NFKBIA	77	640	10.6667	MIA PaCa2	TNF	1	6_11	Rep1_6_11	378.475	1.31033	1.31553
NFKBIA	78	650	10.8333	MIA PaCa2	TNF	1	6_11	Rep1_6_11	382.369	1.31971	1.31031
NFKBIA	79	660	11	MIA PaCa2	TNF	1	6_11	Rep1_6_11	380.899	1.3165	1.30178
NFKBIA	80	670	11.1667	MIA PaCa2	TNF	1	6_11	Rep1_6_11	371.427	1.28771	1.29495
NFKBIA	81	680	11.3333	MIA PaCa2	TNF	1	6_11	Rep1_6_11	371.752	1.28304	1.29133
NFKBIA	82	690	11.5	MIA PaCa2	TNF	1	6_11	Rep1_6_11	369.386	1.27491	1.28586
NFKBIA	83	700	11.6667	MIA PaCa2	TNF	1	6_11	Rep1_6_11	367.368	1.27248	1.27901
NFKBIA	84	710	11.8333	MIA PaCa2	TNF	1	6_11	Rep1_6_11	368.362	1.28493	1.2772
NFKBIA	85	720	12	MIA PaCa2	TNF	1	6_11	Rep1_6_11	369.255	1.28145	1.27539
NFKBIA	86	730	12.1667	MIA PaCa2	TNF	1	6_11	Rep1_6_11	368.928	1.26855	1.27358
NFKBIA	1	-120	-2	MIA PaCa2	Control	1	6_3	Rep1_6_3	318.856	1.03121	1.03634
NFKBIA	2	-110	-1.83333	MIA PaCa2	Control	1	6_3	Rep1_6_3	315.079	1.04813	1.03995
NFKBIA	3	-100	-1.66667	MIA PaCa2	Control	1	6_3	Rep1_6_3	307.682	1.02586	1.04355
NFKBIA	4	-90	-1.5	MIA PaCa2	Control	1	6_3	Rep1_6_3	312.759	1.06579	1.04715
NFKBIA	5	-80	-1.33333	MIA PaCa2	Control	1	6_3	Rep1_6_3	309.116	1.04944	1.05127
NFKBIA	6	-70	-1.16667	MIA PaCa2	Control	1	6_3	Rep1_6_3	307.856	1.06171	1.05131
NFKBIA	7	-60	-1	MIA PaCa2	Control	1	6_3	Rep1_6_3	305.576	1.04794	1.05657
NFKBIA	8	-50	-0.833333	MIA PaCa2	Control	1	6_3	Rep1_6_3	305.713	1.06002	1.05325
NFKBIA	9	-40	-0.666667	MIA PaCa2	Control	1	6_3	Rep1_6_3	301.029	1.04842	1.05243
NFKBIA	10	-30	-0.5	MIA PaCa2	Control	1	6_3	Rep1_6_3	302.651	1.06271	1.05146
NFKBIA	11	-20	-0.333333	MIA PaCa2	Control	1	6_3	Rep1_6_3	298.314	1.04255	1.05377
NFKBIA	12	-10	-0.166667	MIA PaCa2	Control	1	6_3	Rep1_6_3	296.079	1.04363	1.0501
NFKBIA	13	0	0	MIA PaCa2	Control	1	6_3	Rep1_6_3	298.864	1.05497	1.04783
NFKBIA	14	10	0.166667	MIA PaCa2	Control	1	6_3	Rep1_6_3	295.814	1.06407	1.04435
NFKBIA	15	20	0.333333	MIA PaCa2	Control	1	6_3	Rep1_6_3	291.456	1.03436	1.04359
NFKBIA	16	30	0.5	MIA PaCa2	Control	1	6_3	Rep1_6_3	288.727	1.03251	1.0447
NFKBIA	17	40	0.666667	MIA PaCa2	Control	1	6_3	Rep1_6_3	290.782	1.03838	1.04453
NFKBIA	18	50	0.833333	MIA PaCa2	Control	1	6_3	Rep1_6_3	288.222	1.03724	1.03964
NFKBIA	19	60	1	MIA PaCa2	Control	1	6_3	Rep1_6_3	292.195	1.05139	1.03877
NFKBIA	20	70	1.16667	MIA PaCa2	Control	1	6_3	Rep1_6_3	291.288	1.05375	1.04069
NFKBIA	21	80	1.33333	MIA PaCa2	Control	1	6_3	Rep1_6_3	284.806	1.02986	1.04081
NFKBIA	22	90	1.5	MIA PaCa2	Control	1	6_3	Rep1_6_3	287.071	1.02828	1.04247
NFKBIA	23	100	1.66667	MIA PaCa2	Control	1	6_3	Rep1_6_3	288.426	1.0459	1.03925
NFKBIA	24	110	1.83333	MIA PaCa2	Control	1	6_3	Rep1_6_3	288.31	1.03924	1.03488
NFKBIA	25	120	2	MIA PaCa2	Control	1	6_3	Rep1_6_3	291.416	1.04887	1.0348
NFKBIA	26	130	2.16667	MIA PaCa2	Control	1	6_3	Rep1_6_3	285.353	1.02885	1.03587
NFKBIA	27	140	2.33333	MIA PaCa2	Control	1	6_3	Rep1_6_3	283.508	1.02313	1.03213
NFKBIA	28	150	2.5	MIA PaCa2	Control	1	6_3	Rep1_6_3	283.941	1.02932	1.02921
NFKBIA	29	160	2.66667	MIA PaCa2	Control	1	6_3	Rep1_6_3	286.228	1.0358	1.02444
NFKBIA	30	170	2.83333	MIA PaCa2	Control	1	6_3	Rep1_6_3	280.909	1.01968	1.0242
NFKBIA	31	180	3	MIA PaCa2	Control	1	6_3	Rep1_6_3	281.993	1.01884	1.02323
NFKBIA	32	190	3.16667	MIA PaCa2	Control	1	6_3	Rep1_6_3	281.565	1.01546	1.02296
NFKBIA	33	200	3.33333	MIA PaCa2	Control	1	6_3	Rep1_6_3	284.435	1.02719	1.02029
NFKBIA	34	210	3.5	MIA PaCa2	Control	1	6_3	Rep1_6_3	282.572	1.01631	1.02107
NFKBIA	35	220	3.66667	MIA PaCa2	Control	1	6_3	Rep1_6_3	283.755	1.02745	1.01811
NFKBIA	36	230	3.83333	MIA PaCa2	Control	1	6_3	Rep1_6_3	279.764	1.01708	1.01702
NFKBIA	37	240	4	MIA PaCa2	Control	1	6_3	Rep1_6_3	280.781	1.02516	1.01229
NFKBIA	38	250	4.16667	MIA PaCa2	Control	1	6_3	Rep1_6_3	278.547	0.998125	1.01012
NFKBIA	39	260	4.33333	MIA PaCa2	Control	1	6_3	Rep1_6_3	279.87	1.00784	1.00884
NFKBIA	40	270	4.5	MIA PaCa2	Control	1	6_3	Rep1_6_3	275.351	0.994073	1.00937
NFKBIA	41	280	4.66667	MIA PaCa2	Control	1	6_3	Rep1_6_3	277.672	1.00108	1.00778
NFKBIA	42	290	4.83333	MIA PaCa2	Control	1	6_3	Rep1_6_3	280.835	1.01854	1.01316
NFKBIA	43	300	5	MIA PaCa2	Control	1	6_3	Rep1_6_3	280.626	1.02076	1.01729
NFKBIA	44	310	5.16667	MIA PaCa2	Control	1	6_3	Rep1_6_3	282.442	1.01402	1.02326
NFKBIA	45	320	5.33333	MIA PaCa2	Control	1	6_3	Rep1_6_3	284.891	1.03579	1.02534
NFKBIA	46	330	5.5	MIA PaCa2	Control	1	6_3	Rep1_6_3	289.411	1.03679	1.02559
NFKBIA	47	340	5.66667	MIA PaCa2	Control	1	6_3	Rep1_6_3	287.131	1.03581	1.02444
NFKBIA	48	350	5.83333	MIA PaCa2	Control	1	6_3	Rep1_6_3	284.086	1.0157	1.02522
NFKBIA	49	360	6	MIA PaCa2	Control	1	6_3	Rep1_6_3	282.825	1.02029	1.0221
NFKBIA	50	370	6.16667	MIA PaCa2	Control	1	6_3	Rep1_6_3	283.263	1.0127	1.017
NFKBIA	51	380	6.33333	MIA PaCa2	Control	1	6_3	Rep1_6_3	285.99	1.01943	1.01132
NFKBIA	52	390	6.5	MIA PaCa2	Control	1	6_3	Rep1_6_3	287.214	1.01398	1.00942
NFKBIA	53	400	6.66667	MIA PaCa2	Control	1	6_3	Rep1_6_3	284.047	1.00107	1.00643
NFKBIA	54	410	6.83333	MIA PaCa2	Control	1	6_3	Rep1_6_3	284.102	0.996067	1.00646
NFKBIA	55	420	7	MIA PaCa2	Control	1	6_3	Rep1_6_3	282.316	1.00243	1.00599
NFKBIA	56	430	7.16667	MIA PaCa2	Control	1	6_3	Rep1_6_3	283.641	0.999352	1.00776
NFKBIA	57	440	7.33333	MIA PaCa2	Control	1	6_3	Rep1_6_3	287.602	1.01287	1.00944
NFKBIA	58	450	7.5	MIA PaCa2	Control	1	6_3	Rep1_6_3	287.97	1.01613	1.01122
NFKBIA	59	460	7.66667	MIA PaCa2	Control	1	6_3	Rep1_6_3	290.353	1.02642	1.0116
NFKBIA	60	470	7.83333	MIA PaCa2	Control	1	6_3	Rep1_6_3	288.316	1.01282	1.01248
NFKBIA	61	480	8	MIA PaCa2	Control	1	6_3	Rep1_6_3	287.395	1.00854	1.01281
NFKBIA	62	490	8.16667	MIA PaCa2	Control	1	6_3	Rep1_6_3	284.628	1.00506	1.01076
NFKBIA	63	500	8.33333	MIA PaCa2	Control	1	6_3	Rep1_6_3	286.542	1.00549	1.01223
NFKBIA	64	510	8.5	MIA PaCa2	Control	1	6_3	Rep1_6_3	290.117	1.01524	1.01328
NFKBIA	65	520	8.66667	MIA PaCa2	Control	1	6_3	Rep1_6_3	286.135	1.00174	1.01535
NFKBIA	66	530	8.83333	MIA PaCa2	Control	1	6_3	Rep1_6_3	296.246	1.0367	1.01779
NFKBIA	67	540	9	MIA PaCa2	Control	1	6_3	Rep1_6_3	292.745	1.02021	1.01801
NFKBIA	68	550	9.16667	MIA PaCa2	Control	1	6_3	Rep1_6_3	292.468	1.02299	1.01861
NFKBIA	69	560	9.33333	MIA PaCa2	Control	1	6_3	Rep1_6_3	291.423	1.02214	1.01736
NFKBIA	70	570	9.5	MIA PaCa2	Control	1	6_3	Rep1_6_3	287.991	1.00703	1.0126
NFKBIA	71	580	9.66667	MIA PaCa2	Control	1	6_3	Rep1_6_3	290.119	1.01949	1.00805
NFKBIA	72	590	9.83333	MIA PaCa2	Control	1	6_3	Rep1_6_3	287.953	0.992986	1.00405
NFKBIA	73	600	10	MIA PaCa2	Control	1	6_3	Rep1_6_3	290.169	1.00337	1.00277
NFKBIA	74	610	10.1667	MIA PaCa2	Control	1	6_3	Rep1_6_3	289.208	0.98837	1.00285
NFKBIA	75	620	10.3333	MIA PaCa2	Control	1	6_3	Rep1_6_3	288.499	0.994934	1.00153
NFKBIA	76	630	10.5	MIA PaCa2	Control	1	6_3	Rep1_6_3	294.508	1.01318	1.0036
NFKBIA	77	640	10.6667	MIA PaCa2	Control	1	6_3	Rep1_6_3	291.038	1.00761	1.00462
NFKBIA	78	650	10.8333	MIA PaCa2	Control	1	6_3	Rep1_6_3	292.699	1.01022	1.00436
NFKBIA	79	660	11	MIA PaCa2	Control	1	6_3	Rep1_6_3	291.502	1.00752	1.00632
NFKBIA	80	670	11.1667	MIA PaCa2	Control	1	6_3	Rep1_6_3	291.46	1.01047	1.00602
NFKBIA	81	680	11.3333	MIA PaCa2	Control	1	6_3	Rep1_6_3	285.852	0.986572	1.00578
NFKBIA	82	690	11.5	MIA PaCa2	Control	1	6_3	Rep1_6_3	292.239	1.00864	1.00565
NFKBIA	83	700	11.6667	MIA PaCa2	Control	1	6_3	Rep1_6_3	291.902	1.01108	1.00671
NFKBIA	84	710	11.8333	MIA PaCa2	Control	1	6_3	Rep1_6_3	288.386	1.00596	1.00871
NFKBIA	85	720	12	MIA PaCa2	Control	1	6_3	Rep1_6_3	290.838	1.00931	1.01072
NFKBIA	86	730	12.1667	MIA PaCa2	Control	1	6_3	Rep1_6_3	295.165	1.01491	1.01272
NFKBIA	1	-120	-2	MIA PaCa2	Control	1	6_4	Rep1_6_4	334.533	1.08191	1.08011
NFKBIA	2	-110	-1.83333	MIA PaCa2	Control	1	6_4	Rep1_6_4	326.172	1.08504	1.07801
NFKBIA	3	-100	-1.66667	MIA PaCa2	Control	1	6_4	Rep1_6_4	320.715	1.06932	1.07591
NFKBIA	4	-90	-1.5	MIA PaCa2	Control	1	6_4	Rep1_6_4	316.389	1.07816	1.07381
NFKBIA	5	-80	-1.33333	MIA PaCa2	Control	1	6_4	Rep1_6_4	312.276	1.06016	1.07281
NFKBIA	6	-70	-1.16667	MIA PaCa2	Control	1	6_4	Rep1_6_4	307.387	1.06009	1.07076
NFKBIA	7	-60	-1	MIA PaCa2	Control	1	6_4	Rep1_6_4	315.509	1.082	1.07334
NFKBIA	8	-50	-0.833333	MIA PaCa2	Control	1	6_4	Rep1_6_4	310	1.07489	1.07333
NFKBIA	9	-40	-0.666667	MIA PaCa2	Control	1	6_4	Rep1_6_4	307.426	1.0707	1.07633
NFKBIA	10	-30	-0.5	MIA PaCa2	Control	1	6_4	Rep1_6_4	309.684	1.08741	1.07912
NFKBIA	11	-20	-0.333333	MIA PaCa2	Control	1	6_4	Rep1_6_4	308.475	1.07806	1.07784
NFKBIA	12	-10	-0.166667	MIA PaCa2	Control	1	6_4	Rep1_6_4	306.722	1.08114	1.07638
NFKBIA	13	0	0	MIA PaCa2	Control	1	6_4	Rep1_6_4	305.85	1.07963	1.07433
NFKBIA	14	10	0.166667	MIA PaCa2	Control	1	6_4	Rep1_6_4	298.318	1.07307	1.06924
NFKBIA	15	20	0.333333	MIA PaCa2	Control	1	6_4	Rep1_6_4	299.999	1.06468	1.06477
NFKBIA	16	30	0.5	MIA PaCa2	Control	1	6_4	Rep1_6_4	295.393	1.05635	1.05766
NFKBIA	17	40	0.666667	MIA PaCa2	Control	1	6_4	Rep1_6_4	294.528	1.05176	1.05613
NFKBIA	18	50	0.833333	MIA PaCa2	Control	1	6_4	Rep1_6_4	290.871	1.04677	1.05554
NFKBIA	19	60	1	MIA PaCa2	Control	1	6_4	Rep1_6_4	286.625	1.03135	1.05423
NFKBIA	20	70	1.16667	MIA PaCa2	Control	1	6_4	Rep1_6_4	295.476	1.0689	1.05645
NFKBIA	21	80	1.33333	MIA PaCa2	Control	1	6_4	Rep1_6_4	295.619	1.06896	1.05742
NFKBIA	22	90	1.5	MIA PaCa2	Control	1	6_4	Rep1_6_4	294.674	1.05552	1.0583
NFKBIA	23	100	1.66667	MIA PaCa2	Control	1	6_4	Rep1_6_4	295.593	1.07189	1.06184
NFKBIA	24	110	1.83333	MIA PaCa2	Control	1	6_4	Rep1_6_4	293.662	1.05853	1.05813
NFKBIA	25	120	2	MIA PaCa2	Control	1	6_4	Rep1_6_4	292.561	1.05299	1.05628
NFKBIA	26	130	2.16667	MIA PaCa2	Control	1	6_4	Rep1_6_4	292.909	1.05609	1.05496
NFKBIA	27	140	2.33333	MIA PaCa2	Control	1	6_4	Rep1_6_4	288.997	1.04294	1.05058
NFKBIA	28	150	2.5	MIA PaCa2	Control	1	6_4	Rep1_6_4	291.303	1.05601	1.04645
NFKBIA	29	160	2.66667	MIA PaCa2	Control	1	6_4	Rep1_6_4	289.116	1.04625	1.04566
NFKBIA	30	170	2.83333	MIA PaCa2	Control	1	6_4	Rep1_6_4	286.848	1.04124	1.04304
NFKBIA	31	180	3	MIA PaCa2	Control	1	6_4	Rep1_6_4	284.977	1.02962	1.04126
NFKBIA	32	190	3.16667	MIA PaCa2	Control	1	6_4	Rep1_6_4	290.447	1.04749	1.03664
NFKBIA	33	200	3.33333	MIA PaCa2	Control	1	6_4	Rep1_6_4	287.343	1.03769	1.03607
NFKBIA	34	210	3.5	MIA PaCa2	Control	1	6_4	Rep1_6_4	286.52	1.03051	1.03558
NFKBIA	35	220	3.66667	MIA PaCa2	Control	1	6_4	Rep1_6_4	282.708	1.02366	1.03463
NFKBIA	36	230	3.83333	MIA PaCa2	Control	1	6_4	Rep1_6_4	286.694	1.04228	1.03108
NFKBIA	37	240	4	MIA PaCa2	Control	1	6_4	Rep1_6_4	284.251	1.03783	1.02884
NFKBIA	38	250	4.16667	MIA PaCa2	Control	1	6_4	Rep1_6_4	285.481	1.02297	1.03199
NFKBIA	39	260	4.33333	MIA PaCa2	Control	1	6_4	Rep1_6_4	283.975	1.02263	1.03441
NFKBIA	40	270	4.5	MIA PaCa2	Control	1	6_4	Rep1_6_4	283.09	1.02201	1.03547
NFKBIA	41	280	4.66667	MIA PaCa2	Control	1	6_4	Rep1_6_4	291.956	1.05258	1.03365
NFKBIA	42	290	4.83333	MIA PaCa2	Control	1	6_4	Rep1_6_4	286.908	1.04056	1.03613
NFKBIA	43	300	5	MIA PaCa2	Control	1	6_4	Rep1_6_4	288.586	1.04971	1.03678
NFKBIA	44	310	5.16667	MIA PaCa2	Control	1	6_4	Rep1_6_4	285.518	1.02507	1.03999
NFKBIA	45	320	5.33333	MIA PaCa2	Control	1	6_4	Rep1_6_4	286.151	1.04038	1.03507
NFKBIA	46	330	5.5	MIA PaCa2	Control	1	6_4	Rep1_6_4	286.721	1.02715	1.0363
NFKBIA	47	340	5.66667	MIA PaCa2	Control	1	6_4	Rep1_6_4	289.53	1.04446	1.03299
NFKBIA	48	350	5.83333	MIA PaCa2	Control	1	6_4	Rep1_6_4	284.767	1.01814	1.03412
NFKBIA	49	360	6	MIA PaCa2	Control	1	6_4	Rep1_6_4	290.835	1.04919	1.03346
NFKBIA	50	370	6.16667	MIA PaCa2	Control	1	6_4	Rep1_6_4	287.146	1.02658	1.03448
NFKBIA	51	380	6.33333	MIA PaCa2	Control	1	6_4	Rep1_6_4	289.787	1.03297	1.03058
NFKBIA	52	390	6.5	MIA PaCa2	Control	1	6_4	Rep1_6_4	293.368	1.0357	1.03486
NFKBIA	53	400	6.66667	MIA PaCa2	Control	1	6_4	Rep1_6_4	293.477	1.0343	1.03213
NFKBIA	54	410	6.83333	MIA PaCa2	Control	1	6_4	Rep1_6_4	290.124	1.01718	1.03546
NFKBIA	55	420	7	MIA PaCa2	Control	1	6_4	Rep1_6_4	295.17	1.04807	1.0378
NFKBIA	56	430	7.16667	MIA PaCa2	Control	1	6_4	Rep1_6_4	292.365	1.03009	1.03958
NFKBIA	57	440	7.33333	MIA PaCa2	Control	1	6_4	Rep1_6_4	298.119	1.04991	1.03888
NFKBIA	58	450	7.5	MIA PaCa2	Control	1	6_4	Rep1_6_4	297.382	1.04935	1.04085
NFKBIA	59	460	7.66667	MIA PaCa2	Control	1	6_4	Rep1_6_4	296.494	1.04813	1.044
NFKBIA	60	470	7.83333	MIA PaCa2	Control	1	6_4	Rep1_6_4	293.034	1.0294	1.04933
NFKBIA	61	480	8	MIA PaCa2	Control	1	6_4	Rep1_6_4	293.787	1.03097	1.04802
NFKBIA	62	490	8.16667	MIA PaCa2	Control	1	6_4	Rep1_6_4	303.062	1.07015	1.04926
NFKBIA	63	500	8.33333	MIA PaCa2	Control	1	6_4	Rep1_6_4	304.192	1.06743	1.04759
NFKBIA	64	510	8.5	MIA PaCa2	Control	1	6_4	Rep1_6_4	297.396	1.04071	1.05037
NFKBIA	65	520	8.66667	MIA PaCa2	Control	1	6_4	Rep1_6_4	302.216	1.05804	1.0523
NFKBIA	66	530	8.83333	MIA PaCa2	Control	1	6_4	Rep1_6_4	296.166	1.03642	1.04935
NFKBIA	67	540	9	MIA PaCa2	Control	1	6_4	Rep1_6_4	300.969	1.04887	1.04722
NFKBIA	68	550	9.16667	MIA PaCa2	Control	1	6_4	Rep1_6_4	298.62	1.04451	1.05023
NFKBIA	69	560	9.33333	MIA PaCa2	Control	1	6_4	Rep1_6_4	299.227	1.04951	1.04712
NFKBIA	70	570	9.5	MIA PaCa2	Control	1	6_4	Rep1_6_4	300.987	1.05247	1.04769
NFKBIA	71	580	9.66667	MIA PaCa2	Control	1	6_4	Rep1_6_4	302.149	1.06176	1.04403
NFKBIA	72	590	9.83333	MIA PaCa2	Control	1	6_4	Rep1_6_4	300.506	1.03628	1.04311
NFKBIA	73	600	10	MIA PaCa2	Control	1	6_4	Rep1_6_4	300.894	1.04046	1.04188
NFKBIA	74	610	10.1667	MIA PaCa2	Control	1	6_4	Rep1_6_4	299.405	1.02322	1.04083
NFKBIA	75	620	10.3333	MIA PaCa2	Control	1	6_4	Rep1_6_4	301.015	1.0381	1.03811
NFKBIA	76	630	10.5	MIA PaCa2	Control	1	6_4	Rep1_6_4	302.556	1.04087	1.04027
NFKBIA	77	640	10.6667	MIA PaCa2	Control	1	6_4	Rep1_6_4	301.868	1.04511	1.04111
NFKBIA	78	650	10.8333	MIA PaCa2	Control	1	6_4	Rep1_6_4	302.127	1.04276	1.04285
NFKBIA	79	660	11	MIA PaCa2	Control	1	6_4	Rep1_6_4	304.191	1.05138	1.04713
NFKBIA	80	670	11.1667	MIA PaCa2	Control	1	6_4	Rep1_6_4	301.802	1.04633	1.04741
NFKBIA	81	680	11.3333	MIA PaCa2	Control	1	6_4	Rep1_6_4	300	1.0354	1.04724
NFKBIA	82	690	11.5	MIA PaCa2	Control	1	6_4	Rep1_6_4	309.453	1.06806	1.04784
NFKBIA	83	700	11.6667	MIA PaCa2	Control	1	6_4	Rep1_6_4	301.074	1.04285	1.04496
NFKBIA	84	710	11.8333	MIA PaCa2	Control	1	6_4	Rep1_6_4	299.265	1.04391	1.0433
NFKBIA	85	720	12	MIA PaCa2	Control	1	6_4	Rep1_6_4	301.685	1.04696	1.04165
NFKBIA	86	730	12.1667	MIA PaCa2	Control	1	6_4	Rep1_6_4	299.906	1.03122	1.03999
NFKBIA	1	-120	-2	MIA PaCa2	Control	1	6_5	Rep1_6_5	311.409	1.00712	1.04131
NFKBIA	2	-110	-1.83333	MIA PaCa2	Control	1	6_5	Rep1_6_5	320.021	1.06458	1.04688
NFKBIA	3	-100	-1.66667	MIA PaCa2	Control	1	6_5	Rep1_6_5	321.129	1.0707	1.05245
NFKBIA	4	-90	-1.5	MIA PaCa2	Control	1	6_5	Rep1_6_5	315.096	1.07375	1.05803
NFKBIA	5	-80	-1.33333	MIA PaCa2	Control	1	6_5	Rep1_6_5	313.608	1.06469	1.06578
NFKBIA	6	-70	-1.16667	MIA PaCa2	Control	1	6_5	Rep1_6_5	308.36	1.06344	1.06391
NFKBIA	7	-60	-1	MIA PaCa2	Control	1	6_5	Rep1_6_5	309.647	1.0619	1.05938
NFKBIA	8	-50	-0.833333	MIA PaCa2	Control	1	6_5	Rep1_6_5	306.11	1.0614	1.05537
NFKBIA	9	-40	-0.666667	MIA PaCa2	Control	1	6_5	Rep1_6_5	301.922	1.05153	1.05008
NFKBIA	10	-30	-0.5	MIA PaCa2	Control	1	6_5	Rep1_6_5	295.892	1.03898	1.04705
NFKBIA	11	-20	-0.333333	MIA PaCa2	Control	1	6_5	Rep1_6_5	299.198	1.04564	1.04735
NFKBIA	12	-10	-0.166667	MIA PaCa2	Control	1	6_5	Rep1_6_5	291.55	1.02766	1.04194
NFKBIA	13	0	0	MIA PaCa2	Control	1	6_5	Rep1_6_5	295.267	1.04228	1.04055
NFKBIA	14	10	0.166667	MIA PaCa2	Control	1	6_5	Rep1_6_5	295.795	1.064	1.03855
NFKBIA	15	20	0.333333	MIA PaCa2	Control	1	6_5	Rep1_6_5	288.403	1.02353	1.03731
NFKBIA	16	30	0.5	MIA PaCa2	Control	1	6_5	Rep1_6_5	291.323	1.04179	1.03753
NFKBIA	17	40	0.666667	MIA PaCa2	Control	1	6_5	Rep1_6_5	287.025	1.02497	1.03829
NFKBIA	18	50	0.833333	MIA PaCa2	Control	1	6_5	Rep1_6_5	288.145	1.03696	1.03667
NFKBIA	19	60	1	MIA PaCa2	Control	1	6_5	Rep1_6_5	286.025	1.02919	1.03596
NFKBIA	20	70	1.16667	MIA PaCa2	Control	1	6_5	Rep1_6_5	289.595	1.04763	1.03593
NFKBIA	21	80	1.33333	MIA PaCa2	Control	1	6_5	Rep1_6_5	291.106	1.05264	1.0376
NFKBIA	22	90	1.5	MIA PaCa2	Control	1	6_5	Rep1_6_5	284.359	1.01857	1.03788
NFKBIA	23	100	1.66667	MIA PaCa2	Control	1	6_5	Rep1_6_5	287.233	1.04157	1.03829
NFKBIA	24	110	1.83333	MIA PaCa2	Control	1	6_5	Rep1_6_5	287.584	1.03663	1.03581
NFKBIA	25	120	2	MIA PaCa2	Control	1	6_5	Rep1_6_5	288.665	1.03897	1.03347
NFKBIA	26	130	2.16667	MIA PaCa2	Control	1	6_5	Rep1_6_5	286.246	1.03207	1.03598
NFKBIA	27	140	2.33333	MIA PaCa2	Control	1	6_5	Rep1_6_5	285.469	1.03021	1.0367
NFKBIA	28	150	2.5	MIA PaCa2	Control	1	6_5	Rep1_6_5	285.864	1.03629	1.03793
NFKBIA	29	160	2.66667	MIA PaCa2	Control	1	6_5	Rep1_6_5	286.321	1.03614	1.03838
NFKBIA	30	170	2.83333	MIA PaCa2	Control	1	6_5	Rep1_6_5	288.325	1.0466	1.04002
NFKBIA	31	180	3	MIA PaCa2	Control	1	6_5	Rep1_6_5	289.303	1.04524	1.0402
NFKBIA	32	190	3.16667	MIA PaCa2	Control	1	6_5	Rep1_6_5	288.964	1.04214	1.04042
NFKBIA	33	200	3.33333	MIA PaCa2	Control	1	6_5	Rep1_6_5	288.947	1.04349	1.04114
NFKBIA	34	210	3.5	MIA PaCa2	Control	1	6_5	Rep1_6_5	286.788	1.03148	1.04113
NFKBIA	35	220	3.66667	MIA PaCa2	Control	1	6_5	Rep1_6_5	286.625	1.03784	1.03705
NFKBIA	36	230	3.83333	MIA PaCa2	Control	1	6_5	Rep1_6_5	286.401	1.04121	1.03503
NFKBIA	37	240	4	MIA PaCa2	Control	1	6_5	Rep1_6_5	286.621	1.04649	1.03598
NFKBIA	38	250	4.16667	MIA PaCa2	Control	1	6_5	Rep1_6_5	283.723	1.01667	1.03842
NFKBIA	39	260	4.33333	MIA PaCa2	Control	1	6_5	Rep1_6_5	285.469	1.02801	1.03725
NFKBIA	40	270	4.5	MIA PaCa2	Control	1	6_5	Rep1_6_5	290.889	1.05017	1.03825
NFKBIA	41	280	4.66667	MIA PaCa2	Control	1	6_5	Rep1_6_5	290.836	1.04854	1.03504
NFKBIA	42	290	4.83333	MIA PaCa2	Control	1	6_5	Rep1_6_5	283.896	1.02964	1.04
NFKBIA	43	300	5	MIA PaCa2	Control	1	6_5	Rep1_6_5	288.175	1.04822	1.03984
NFKBIA	44	310	5.16667	MIA PaCa2	Control	1	6_5	Rep1_6_5	285.23	1.02403	1.03856
NFKBIA	45	320	5.33333	MIA PaCa2	Control	1	6_5	Rep1_6_5	289.184	1.05141	1.0342
NFKBIA	46	330	5.5	MIA PaCa2	Control	1	6_5	Rep1_6_5	286.649	1.02689	1.03713
NFKBIA	47	340	5.66667	MIA PaCa2	Control	1	6_5	Rep1_6_5	288.618	1.04118	1.03649
NFKBIA	48	350	5.83333	MIA PaCa2	Control	1	6_5	Rep1_6_5	284.743	1.01805	1.04002
NFKBIA	49	360	6	MIA PaCa2	Control	1	6_5	Rep1_6_5	291.097	1.05013	1.03869
NFKBIA	50	370	6.16667	MIA PaCa2	Control	1	6_5	Rep1_6_5	291.945	1.04374	1.03723
NFKBIA	51	380	6.33333	MIA PaCa2	Control	1	6_5	Rep1_6_5	294.222	1.04877	1.03461
NFKBIA	52	390	6.5	MIA PaCa2	Control	1	6_5	Rep1_6_5	295.175	1.04208	1.03712
NFKBIA	53	400	6.66667	MIA PaCa2	Control	1	6_5	Rep1_6_5	288.466	1.01664	1.03179
NFKBIA	54	410	6.83333	MIA PaCa2	Control	1	6_5	Rep1_6_5	291.737	1.02283	1.02878
NFKBIA	55	420	7	MIA PaCa2	Control	1	6_5	Rep1_6_5	291.667	1.03563	1.02861
NFKBIA	56	430	7.16667	MIA PaCa2	Control	1	6_5	Rep1_6_5	287.475	1.01286	1.02826
NFKBIA	57	440	7.33333	MIA PaCa2	Control	1	6_5	Rep1_6_5	290.373	1.02263	1.03029
NFKBIA	58	450	7.5	MIA PaCa2	Control	1	6_5	Rep1_6_5	296.875	1.04756	1.03092
NFKBIA	59	460	7.66667	MIA PaCa2	Control	1	6_5	Rep1_6_5	294.105	1.03969	1.0323
NFKBIA	60	470	7.83333	MIA PaCa2	Control	1	6_5	Rep1_6_5	293.431	1.0308	1.03546
NFKBIA	61	480	8	MIA PaCa2	Control	1	6_5	Rep1_6_5	292.74	1.0273	1.03614
NFKBIA	62	490	8.16667	MIA PaCa2	Control	1	6_5	Rep1_6_5	296.009	1.04524	1.03551
NFKBIA	63	500	8.33333	MIA PaCa2	Control	1	6_5	Rep1_6_5	294.951	1.035	1.03236
NFKBIA	64	510	8.5	MIA PaCa2	Control	1	6_5	Rep1_6_5	293.602	1.02744	1.03128
NFKBIA	65	520	8.66667	MIA PaCa2	Control	1	6_5	Rep1_6_5	297.956	1.04312	1.03113
NFKBIA	66	530	8.83333	MIA PaCa2	Control	1	6_5	Rep1_6_5	290.79	1.0176	1.03197
NFKBIA	67	540	9	MIA PaCa2	Control	1	6_5	Rep1_6_5	293.612	1.02323	1.03084
NFKBIA	68	550	9.16667	MIA PaCa2	Control	1	6_5	Rep1_6_5	293.41	1.02629	1.03308
NFKBIA	69	560	9.33333	MIA PaCa2	Control	1	6_5	Rep1_6_5	299.678	1.05109	1.03144
NFKBIA	70	570	9.5	MIA PaCa2	Control	1	6_5	Rep1_6_5	293.744	1.02715	1.03197
NFKBIA	71	580	9.66667	MIA PaCa2	Control	1	6_5	Rep1_6_5	296.839	1.04311	1.03105
NFKBIA	72	590	9.83333	MIA PaCa2	Control	1	6_5	Rep1_6_5	299.158	1.03163	1.03262
NFKBIA	73	600	10	MIA PaCa2	Control	1	6_5	Rep1_6_5	295.355	1.0213	1.03073
NFKBIA	74	610	10.1667	MIA PaCa2	Control	1	6_5	Rep1_6_5	297.518	1.01677	1.03521
NFKBIA	75	620	10.3333	MIA PaCa2	Control	1	6_5	Rep1_6_5	300.787	1.03731	1.03381
NFKBIA	76	630	10.5	MIA PaCa2	Control	1	6_5	Rep1_6_5	301.672	1.03783	1.03407
NFKBIA	77	640	10.6667	MIA PaCa2	Control	1	6_5	Rep1_6_5	305.741	1.05852	1.03561
NFKBIA	78	650	10.8333	MIA PaCa2	Control	1	6_5	Rep1_6_5	299.387	1.0333	1.04032
NFKBIA	79	660	11	MIA PaCa2	Control	1	6_5	Rep1_6_5	299.013	1.03348	1.03976
NFKBIA	80	670	11.1667	MIA PaCa2	Control	1	6_5	Rep1_6_5	297.694	1.03209	1.03793
NFKBIA	81	680	11.3333	MIA PaCa2	Control	1	6_5	Rep1_6_5	304.144	1.0497	1.03778
NFKBIA	82	690	11.5	MIA PaCa2	Control	1	6_5	Rep1_6_5	299.411	1.0334	1.03951
NFKBIA	83	700	11.6667	MIA PaCa2	Control	1	6_5	Rep1_6_5	295.921	1.025	1.03777
NFKBIA	84	710	11.8333	MIA PaCa2	Control	1	6_5	Rep1_6_5	303.167	1.05752	1.03717
NFKBIA	85	720	12	MIA PaCa2	Control	1	6_5	Rep1_6_5	301.239	1.04541	1.03657
NFKBIA	86	730	12.1667	MIA PaCa2	Control	1	6_5	Rep1_6_5	297.023	1.0213	1.03597
NFKBIA	1	-120	-2	MIA PaCa2	TNF	1	6_9	Rep1_6_9	322.507	1.04302	1.06109
NFKBIA	2	-110	-1.83333	MIA PaCa2	TNF	1	6_9	Rep1_6_9	323.009	1.07452	1.06458
NFKBIA	3	-100	-1.66667	MIA PaCa2	TNF	1	6_9	Rep1_6_9	321.197	1.07092	1.06807
NFKBIA	4	-90	-1.5	MIA PaCa2	TNF	1	6_9	Rep1_6_9	319.494	1.08874	1.07156
NFKBIA	5	-80	-1.33333	MIA PaCa2	TNF	1	6_9	Rep1_6_9	315.82	1.07219	1.07339
NFKBIA	6	-70	-1.16667	MIA PaCa2	TNF	1	6_9	Rep1_6_9	313.16	1.08	1.07345
NFKBIA	7	-60	-1	MIA PaCa2	TNF	1	6_9	Rep1_6_9	312.454	1.07152	1.07256
NFKBIA	8	-50	-0.833333	MIA PaCa2	TNF	1	6_9	Rep1_6_9	304.498	1.05581	1.06894
NFKBIA	9	-40	-0.666667	MIA PaCa2	TNF	1	6_9	Rep1_6_9	308.659	1.07499	1.06931
NFKBIA	10	-30	-0.5	MIA PaCa2	TNF	1	6_9	Rep1_6_9	303.212	1.06468	1.06826
NFKBIA	11	-20	-0.333333	MIA PaCa2	TNF	1	6_9	Rep1_6_9	304.274	1.06338	1.13481
NFKBIA	12	-10	-0.166667	MIA PaCa2	TNF	1	6_9	Rep1_6_9	304.912	1.07476	1.21453
NFKBIA	13	0	0	MIA PaCa2	TNF	1	6_9	Rep1_6_9	303.884	1.07269	1.29198
NFKBIA	14	10	0.166667	MIA PaCa2	TNF	1	6_9	Rep1_6_9	427.378	1.53731	1.36829
NFKBIA	15	20	0.333333	MIA PaCa2	TNF	1	6_9	Rep1_6_9	454.756	1.61391	1.44753
NFKBIA	16	30	0.5	MIA PaCa2	TNF	1	6_9	Rep1_6_9	452.198	1.61709	1.52597
NFKBIA	17	40	0.666667	MIA PaCa2	TNF	1	6_9	Rep1_6_9	447.737	1.59887	1.60442
NFKBIA	18	50	0.833333	MIA PaCa2	TNF	1	6_9	Rep1_6_9	449.619	1.61806	1.6147
NFKBIA	19	60	1	MIA PaCa2	TNF	1	6_9	Rep1_6_9	451.29	1.62385	1.6126
NFKBIA	20	70	1.16667	MIA PaCa2	TNF	1	6_9	Rep1_6_9	448.322	1.62183	1.61181
NFKBIA	21	80	1.33333	MIA PaCa2	TNF	1	6_9	Rep1_6_9	445.046	1.60929	1.61526
NFKBIA	22	90	1.5	MIA PaCa2	TNF	1	6_9	Rep1_6_9	446.459	1.59921	1.61323
NFKBIA	23	100	1.66667	MIA PaCa2	TNF	1	6_9	Rep1_6_9	444.418	1.61156	1.60912
NFKBIA	24	110	1.83333	MIA PaCa2	TNF	1	6_9	Rep1_6_9	450.267	1.62303	1.60628
NFKBIA	25	120	2	MIA PaCa2	TNF	1	6_9	Rep1_6_9	445.616	1.60387	1.60518
NFKBIA	26	130	2.16667	MIA PaCa2	TNF	1	6_9	Rep1_6_9	442.394	1.59506	1.60315
NFKBIA	27	140	2.33333	MIA PaCa2	TNF	1	6_9	Rep1_6_9	443.898	1.60195	1.60065
NFKBIA	28	150	2.5	MIA PaCa2	TNF	1	6_9	Rep1_6_9	441.798	1.60158	1.59469
NFKBIA	29	160	2.66667	MIA PaCa2	TNF	1	6_9	Rep1_6_9	438.002	1.58504	1.59067
NFKBIA	30	170	2.83333	MIA PaCa2	TNF	1	6_9	Rep1_6_9	439.139	1.59405	1.58985
NFKBIA	31	180	3	MIA PaCa2	TNF	1	6_9	Rep1_6_9	437.67	1.58129	1.58493
NFKBIA	32	190	3.16667	MIA PaCa2	TNF	1	6_9	Rep1_6_9	436.918	1.57573	1.58049
NFKBIA	33	200	3.33333	MIA PaCa2	TNF	1	6_9	Rep1_6_9	440.088	1.58931	1.58059
NFKBIA	34	210	3.5	MIA PaCa2	TNF	1	6_9	Rep1_6_9	435.828	1.56752	1.57965
NFKBIA	35	220	3.66667	MIA PaCa2	TNF	1	6_9	Rep1_6_9	433.725	1.57047	1.57702
NFKBIA	36	230	3.83333	MIA PaCa2	TNF	1	6_9	Rep1_6_9	436.187	1.58575	1.57466
NFKBIA	37	240	4	MIA PaCa2	TNF	1	6_9	Rep1_6_9	434.797	1.58749	1.56928
NFKBIA	38	250	4.16667	MIA PaCa2	TNF	1	6_9	Rep1_6_9	436.147	1.56286	1.56543
NFKBIA	39	260	4.33333	MIA PaCa2	TNF	1	6_9	Rep1_6_9	432.977	1.5592	1.56147
NFKBIA	40	270	4.5	MIA PaCa2	TNF	1	6_9	Rep1_6_9	429.797	1.55165	1.5558
NFKBIA	41	280	4.66667	MIA PaCa2	TNF	1	6_9	Rep1_6_9	427.316	1.54059	1.54663
NFKBIA	42	290	4.83333	MIA PaCa2	TNF	1	6_9	Rep1_6_9	425.367	1.54273	1.54135
NFKBIA	43	300	5	MIA PaCa2	TNF	1	6_9	Rep1_6_9	425.049	1.54609	1.53385
NFKBIA	44	310	5.16667	MIA PaCa2	TNF	1	6_9	Rep1_6_9	424.303	1.52333	1.52804
NFKBIA	45	320	5.33333	MIA PaCa2	TNF	1	6_9	Rep1_6_9	419.682	1.52586	1.52025
NFKBIA	46	330	5.5	MIA PaCa2	TNF	1	6_9	Rep1_6_9	420.592	1.50673	1.51043
NFKBIA	47	340	5.66667	MIA PaCa2	TNF	1	6_9	Rep1_6_9	418.85	1.51098	1.5002
NFKBIA	48	350	5.83333	MIA PaCa2	TNF	1	6_9	Rep1_6_9	415.638	1.48605	1.48956
NFKBIA	49	360	6	MIA PaCa2	TNF	1	6_9	Rep1_6_9	408.58	1.47395	1.47881
NFKBIA	50	370	6.16667	MIA PaCa2	TNF	1	6_9	Rep1_6_9	412.43	1.47448	1.46789
NFKBIA	51	380	6.33333	MIA PaCa2	TNF	1	6_9	Rep1_6_9	406.462	1.44886	1.45421
NFKBIA	52	390	6.5	MIA PaCa2	TNF	1	6_9	Rep1_6_9	410.894	1.45061	1.44542
NFKBIA	53	400	6.66667	MIA PaCa2	TNF	1	6_9	Rep1_6_9	405.842	1.43031	1.43493
NFKBIA	54	410	6.83333	MIA PaCa2	TNF	1	6_9	Rep1_6_9	403.648	1.41519	1.42483
NFKBIA	55	420	7	MIA PaCa2	TNF	1	6_9	Rep1_6_9	401.184	1.4245	1.4181
NFKBIA	56	430	7.16667	MIA PaCa2	TNF	1	6_9	Rep1_6_9	397.506	1.40053	1.40939
NFKBIA	57	440	7.33333	MIA PaCa2	TNF	1	6_9	Rep1_6_9	398.602	1.40379	1.40028
NFKBIA	58	450	7.5	MIA PaCa2	TNF	1	6_9	Rep1_6_9	397.256	1.40176	1.39477
NFKBIA	59	460	7.66667	MIA PaCa2	TNF	1	6_9	Rep1_6_9	393.103	1.38965	1.39072
NFKBIA	60	470	7.83333	MIA PaCa2	TNF	1	6_9	Rep1_6_9	388.997	1.36651	1.38364
NFKBIA	61	480	8	MIA PaCa2	TNF	1	6_9	Rep1_6_9	392.299	1.37667	1.37829
NFKBIA	62	490	8.16667	MIA PaCa2	TNF	1	6_9	Rep1_6_9	395.378	1.39613	1.37224
NFKBIA	63	500	8.33333	MIA PaCa2	TNF	1	6_9	Rep1_6_9	384.991	1.35095	1.36634
NFKBIA	64	510	8.5	MIA PaCa2	TNF	1	6_9	Rep1_6_9	390.454	1.36636	1.36201
NFKBIA	65	520	8.66667	MIA PaCa2	TNF	1	6_9	Rep1_6_9	388.302	1.35942	1.35704
NFKBIA	66	530	8.83333	MIA PaCa2	TNF	1	6_9	Rep1_6_9	385.292	1.34831	1.34708
NFKBIA	67	540	9	MIA PaCa2	TNF	1	6_9	Rep1_6_9	383.428	1.33623	1.34318
NFKBIA	68	550	9.16667	MIA PaCa2	TNF	1	6_9	Rep1_6_9	383.633	1.34187	1.33628
NFKBIA	69	560	9.33333	MIA PaCa2	TNF	1	6_9	Rep1_6_9	378.167	1.32639	1.32861
NFKBIA	70	570	9.5	MIA PaCa2	TNF	1	6_9	Rep1_6_9	378.54	1.32365	1.31889
NFKBIA	71	580	9.66667	MIA PaCa2	TNF	1	6_9	Rep1_6_9	375.085	1.31806	1.30934
NFKBIA	72	590	9.83333	MIA PaCa2	TNF	1	6_9	Rep1_6_9	378.656	1.30577	1.29939
NFKBIA	73	600	10	MIA PaCa2	TNF	1	6_9	Rep1_6_9	370.242	1.28025	1.29457
NFKBIA	74	610	10.1667	MIA PaCa2	TNF	1	6_9	Rep1_6_9	371.433	1.26937	1.2896
NFKBIA	75	620	10.3333	MIA PaCa2	TNF	1	6_9	Rep1_6_9	368.915	1.27226	1.27997
NFKBIA	76	630	10.5	MIA PaCa2	TNF	1	6_9	Rep1_6_9	375.737	1.29264	1.27172
NFKBIA	77	640	10.6667	MIA PaCa2	TNF	1	6_9	Rep1_6_9	372.278	1.28888	1.27129
NFKBIA	78	650	10.8333	MIA PaCa2	TNF	1	6_9	Rep1_6_9	362.356	1.25063	1.26936
NFKBIA	79	660	11	MIA PaCa2	TNF	1	6_9	Rep1_6_9	361.087	1.24802	1.26344
NFKBIA	80	670	11.1667	MIA PaCa2	TNF	1	6_9	Rep1_6_9	368.403	1.27723	1.2595
NFKBIA	81	680	11.3333	MIA PaCa2	TNF	1	6_9	Rep1_6_9	363.867	1.25583	1.25471
NFKBIA	82	690	11.5	MIA PaCa2	TNF	1	6_9	Rep1_6_9	356.63	1.23088	1.25563
NFKBIA	83	700	11.6667	MIA PaCa2	TNF	1	6_9	Rep1_6_9	365.206	1.26499	1.24995
NFKBIA	84	710	11.8333	MIA PaCa2	TNF	1	6_9	Rep1_6_9	359.896	1.2554	1.24353
NFKBIA	85	720	12	MIA PaCa2	TNF	1	6_9	Rep1_6_9	362.222	1.25704	1.2371
NFKBIA	86	730	12.1667	MIA PaCa2	TNF	1	6_9	Rep1_6_9	351.403	1.20829	1.23068
NFKBIB	1	-120	-2	MIA PaCa2	TNF	1	7_10	Rep1_7_10	323.12	1.045	1.03418
NFKBIB	2	-110	-1.83333	MIA PaCa2	TNF	1	7_10	Rep1_7_10	309.366	1.02913	1.03316
NFKBIB	3	-100	-1.66667	MIA PaCa2	TNF	1	7_10	Rep1_7_10	308.323	1.028	1.03213
NFKBIB	4	-90	-1.5	MIA PaCa2	TNF	1	7_10	Rep1_7_10	301.299	1.02673	1.03111
NFKBIB	5	-80	-1.33333	MIA PaCa2	TNF	1	7_10	Rep1_7_10	300.097	1.01881	1.02982
NFKBIB	6	-70	-1.16667	MIA PaCa2	TNF	1	7_10	Rep1_7_10	300.552	1.03652	1.02822
NFKBIB	7	-60	-1	MIA PaCa2	TNF	1	7_10	Rep1_7_10	301.392	1.03359	1.02688
NFKBIB	8	-50	-0.833333	MIA PaCa2	TNF	1	7_10	Rep1_7_10	298.768	1.03594	1.02515
NFKBIB	9	-40	-0.666667	MIA PaCa2	TNF	1	7_10	Rep1_7_10	292.271	1.01792	1.02657
NFKBIB	10	-30	-0.5	MIA PaCa2	TNF	1	7_10	Rep1_7_10	290.108	1.01867	1.02707
NFKBIB	11	-20	-0.333333	MIA PaCa2	TNF	1	7_10	Rep1_7_10	290.315	1.0146	1.11082
NFKBIB	12	-10	-0.166667	MIA PaCa2	TNF	1	7_10	Rep1_7_10	291.869	1.02879	1.19377
NFKBIB	13	0	0	MIA PaCa2	TNF	1	7_10	Rep1_7_10	294.629	1.04002	1.28082
NFKBIB	14	10	0.166667	MIA PaCa2	TNF	1	7_10	Rep1_7_10	450.311	1.6198	1.36742
NFKBIB	15	20	0.333333	MIA PaCa2	TNF	1	7_10	Rep1_7_10	455.516	1.61661	1.45588
NFKBIB	16	30	0.5	MIA PaCa2	TNF	1	7_10	Rep1_7_10	455.044	1.62727	1.54014
NFKBIB	17	40	0.666667	MIA PaCa2	TNF	1	7_10	Rep1_7_10	455.016	1.62486	1.62207
NFKBIB	18	50	0.833333	MIA PaCa2	TNF	1	7_10	Rep1_7_10	453.993	1.6338	1.62233
NFKBIB	19	60	1	MIA PaCa2	TNF	1	7_10	Rep1_7_10	449.838	1.61863	1.61943
NFKBIB	20	70	1.16667	MIA PaCa2	TNF	1	7_10	Rep1_7_10	446.016	1.61349	1.61738
NFKBIB	21	80	1.33333	MIA PaCa2	TNF	1	7_10	Rep1_7_10	448.474	1.62168	1.61541
NFKBIB	22	90	1.5	MIA PaCa2	TNF	1	7_10	Rep1_7_10	445.639	1.59627	1.60868
NFKBIB	23	100	1.66667	MIA PaCa2	TNF	1	7_10	Rep1_7_10	444.798	1.61294	1.60694
NFKBIB	24	110	1.83333	MIA PaCa2	TNF	1	7_10	Rep1_7_10	446.953	1.61109	1.60555
NFKBIB	25	120	2	MIA PaCa2	TNF	1	7_10	Rep1_7_10	440.838	1.58667	1.6019
NFKBIB	26	130	2.16667	MIA PaCa2	TNF	1	7_10	Rep1_7_10	445.551	1.60644	1.60196
NFKBIB	27	140	2.33333	MIA PaCa2	TNF	1	7_10	Rep1_7_10	444.398	1.60375	1.59672
NFKBIB	28	150	2.5	MIA PaCa2	TNF	1	7_10	Rep1_7_10	440.294	1.59612	1.59057
NFKBIB	29	160	2.66667	MIA PaCa2	TNF	1	7_10	Rep1_7_10	441.233	1.59673	1.58826
NFKBIB	30	170	2.83333	MIA PaCa2	TNF	1	7_10	Rep1_7_10	434.229	1.57622	1.58418
NFKBIB	31	180	3	MIA PaCa2	TNF	1	7_10	Rep1_7_10	434.005	1.56805	1.57954
NFKBIB	32	190	3.16667	MIA PaCa2	TNF	1	7_10	Rep1_7_10	435.456	1.57046	1.57398
NFKBIB	33	200	3.33333	MIA PaCa2	TNF	1	7_10	Rep1_7_10	436.93	1.57791	1.57271
NFKBIB	34	210	3.5	MIA PaCa2	TNF	1	7_10	Rep1_7_10	436.871	1.57127	1.57424
NFKBIB	35	220	3.66667	MIA PaCa2	TNF	1	7_10	Rep1_7_10	430.063	1.55721	1.57258
NFKBIB	36	230	3.83333	MIA PaCa2	TNF	1	7_10	Rep1_7_10	436.756	1.58783	1.57185
NFKBIB	37	240	4	MIA PaCa2	TNF	1	7_10	Rep1_7_10	434.654	1.58697	1.57092
NFKBIB	38	250	4.16667	MIA PaCa2	TNF	1	7_10	Rep1_7_10	434.348	1.55641	1.57072
NFKBIB	39	260	4.33333	MIA PaCa2	TNF	1	7_10	Rep1_7_10	434.679	1.56533	1.57328
NFKBIB	40	270	4.5	MIA PaCa2	TNF	1	7_10	Rep1_7_10	435.271	1.57142	1.57111
NFKBIB	41	280	4.66667	MIA PaCa2	TNF	1	7_10	Rep1_7_10	435.448	1.5699	1.56935
NFKBIB	42	290	4.83333	MIA PaCa2	TNF	1	7_10	Rep1_7_10	434.296	1.57512	1.57409
NFKBIB	43	300	5	MIA PaCa2	TNF	1	7_10	Rep1_7_10	432.334	1.57259	1.58037
NFKBIB	44	310	5.16667	MIA PaCa2	TNF	1	7_10	Rep1_7_10	438.606	1.57468	1.58561
NFKBIB	45	320	5.33333	MIA PaCa2	TNF	1	7_10	Rep1_7_10	437.213	1.5896	1.59227
NFKBIB	46	330	5.5	MIA PaCa2	TNF	1	7_10	Rep1_7_10	449.221	1.60929	1.59208
NFKBIB	47	340	5.66667	MIA PaCa2	TNF	1	7_10	Rep1_7_10	445.767	1.60808	1.59058
NFKBIB	48	350	5.83333	MIA PaCa2	TNF	1	7_10	Rep1_7_10	452.143	1.61657	1.59093
NFKBIB	49	360	6	MIA PaCa2	TNF	1	7_10	Rep1_7_10	436.256	1.57379	1.58817
NFKBIB	50	370	6.16667	MIA PaCa2	TNF	1	7_10	Rep1_7_10	436.925	1.56206	1.58377
NFKBIB	51	380	6.33333	MIA PaCa2	TNF	1	7_10	Rep1_7_10	442.445	1.57712	1.578
NFKBIB	52	390	6.5	MIA PaCa2	TNF	1	7_10	Rep1_7_10	444.793	1.57029	1.57242
NFKBIB	53	400	6.66667	MIA PaCa2	TNF	1	7_10	Rep1_7_10	447.89	1.5785	1.56947
NFKBIB	54	410	6.83333	MIA PaCa2	TNF	1	7_10	Rep1_7_10	447.132	1.56765	1.57158
NFKBIB	55	420	7	MIA PaCa2	TNF	1	7_10	Rep1_7_10	444.271	1.57749	1.57002
NFKBIB	56	430	7.16667	MIA PaCa2	TNF	1	7_10	Rep1_7_10	440.831	1.55318	1.57297
NFKBIB	57	440	7.33333	MIA PaCa2	TNF	1	7_10	Rep1_7_10	447.736	1.57683	1.56852
NFKBIB	58	450	7.5	MIA PaCa2	TNF	1	7_10	Rep1_7_10	443.868	1.56624	1.56826
NFKBIB	59	460	7.66667	MIA PaCa2	TNF	1	7_10	Rep1_7_10	450.043	1.59094	1.57148
NFKBIB	60	470	7.83333	MIA PaCa2	TNF	1	7_10	Rep1_7_10	440.459	1.54729	1.57132
NFKBIB	61	480	8	MIA PaCa2	TNF	1	7_10	Rep1_7_10	446.221	1.5659	1.56595
NFKBIB	62	490	8.16667	MIA PaCa2	TNF	1	7_10	Rep1_7_10	453.104	1.59996	1.5613
NFKBIB	63	500	8.33333	MIA PaCa2	TNF	1	7_10	Rep1_7_10	442.317	1.55211	1.54645
NFKBIB	64	510	8.5	MIA PaCa2	TNF	1	7_10	Rep1_7_10	439.849	1.53921	1.54531
NFKBIB	65	520	8.66667	MIA PaCa2	TNF	1	7_10	Rep1_7_10	438.08	1.53369	1.54172
NFKBIB	66	530	8.83333	MIA PaCa2	TNF	1	7_10	Rep1_7_10	424.918	1.48697	1.52756
NFKBIB	67	540	9	MIA PaCa2	TNF	1	7_10	Rep1_7_10	441.707	1.53933	1.51824
NFKBIB	68	550	9.16667	MIA PaCa2	TNF	1	7_10	Rep1_7_10	440.494	1.54076	1.5177
NFKBIB	69	560	9.33333	MIA PaCa2	TNF	1	7_10	Rep1_7_10	427.912	1.50086	1.51241
NFKBIB	70	570	9.5	MIA PaCa2	TNF	1	7_10	Rep1_7_10	425.214	1.48686	1.51363
NFKBIB	71	580	9.66667	MIA PaCa2	TNF	1	7_10	Rep1_7_10	436.932	1.5354	1.50528
NFKBIB	72	590	9.83333	MIA PaCa2	TNF	1	7_10	Rep1_7_10	434.017	1.49668	1.48804
NFKBIB	73	600	10	MIA PaCa2	TNF	1	7_10	Rep1_7_10	432.501	1.49554	1.48318
NFKBIB	74	610	10.1667	MIA PaCa2	TNF	1	7_10	Rep1_7_10	433.307	1.48083	1.47799
NFKBIB	75	620	10.3333	MIA PaCa2	TNF	1	7_10	Rep1_7_10	411.796	1.42014	1.46321
NFKBIB	76	630	10.5	MIA PaCa2	TNF	1	7_10	Rep1_7_10	426.356	1.46678	1.45612
NFKBIB	77	640	10.6667	MIA PaCa2	TNF	1	7_10	Rep1_7_10	418.975	1.45055	1.44692
NFKBIB	78	650	10.8333	MIA PaCa2	TNF	1	7_10	Rep1_7_10	414.894	1.43196	1.4407
NFKBIB	79	660	11	MIA PaCa2	TNF	1	7_10	Rep1_7_10	418.674	1.44706	1.44327
NFKBIB	80	670	11.1667	MIA PaCa2	TNF	1	7_10	Rep1_7_10	412.791	1.43112	1.43975
NFKBIB	81	680	11.3333	MIA PaCa2	TNF	1	7_10	Rep1_7_10	416.45	1.43731	1.4375
NFKBIB	82	690	11.5	MIA PaCa2	TNF	1	7_10	Rep1_7_10	416.669	1.4381	1.43788
NFKBIB	83	700	11.6667	MIA PaCa2	TNF	1	7_10	Rep1_7_10	416.352	1.44215	1.4319
NFKBIB	84	710	11.8333	MIA PaCa2	TNF	1	7_10	Rep1_7_10	411.329	1.43481	1.42881
NFKBIB	85	720	12	MIA PaCa2	TNF	1	7_10	Rep1_7_10	413.387	1.4346	1.42572
NFKBIB	86	730	12.1667	MIA PaCa2	TNF	1	7_10	Rep1_7_10	408.664	1.40518	1.42262
NFKBIB	1	-120	-2	MIA PaCa2	TNF	1	7_11	Rep1_7_11	317.419	1.02656	1.02829
NFKBIB	2	-110	-1.83333	MIA PaCa2	TNF	1	7_11	Rep1_7_11	312.027	1.03798	1.02448
NFKBIB	3	-100	-1.66667	MIA PaCa2	TNF	1	7_11	Rep1_7_11	306.287	1.02121	1.02067
NFKBIB	4	-90	-1.5	MIA PaCa2	TNF	1	7_11	Rep1_7_11	290.895	0.991282	1.01685
NFKBIB	5	-80	-1.33333	MIA PaCa2	TNF	1	7_11	Rep1_7_11	298.999	1.01509	1.0166
NFKBIB	6	-70	-1.16667	MIA PaCa2	TNF	1	7_11	Rep1_7_11	296.498	1.02253	1.01404
NFKBIB	7	-60	-1	MIA PaCa2	TNF	1	7_11	Rep1_7_11	292.565	1.00332	1.01504
NFKBIB	8	-50	-0.833333	MIA PaCa2	TNF	1	7_11	Rep1_7_11	295.54	1.02475	1.01957
NFKBIB	9	-40	-0.666667	MIA PaCa2	TNF	1	7_11	Rep1_7_11	292.897	1.0201	1.02353
NFKBIB	10	-30	-0.5	MIA PaCa2	TNF	1	7_11	Rep1_7_11	292.833	1.02824	1.02749
NFKBIB	11	-20	-0.333333	MIA PaCa2	TNF	1	7_11	Rep1_7_11	292.712	1.02297	1.11686
NFKBIB	12	-10	-0.166667	MIA PaCa2	TNF	1	7_11	Rep1_7_11	295.843	1.0428	1.20207
NFKBIB	13	0	0	MIA PaCa2	TNF	1	7_11	Rep1_7_11	297.531	1.05027	1.28926
NFKBIB	14	10	0.166667	MIA PaCa2	TNF	1	7_11	Rep1_7_11	452.835	1.62888	1.37352
NFKBIB	15	20	0.333333	MIA PaCa2	TNF	1	7_11	Rep1_7_11	456.819	1.62123	1.45716
NFKBIB	16	30	0.5	MIA PaCa2	TNF	1	7_11	Rep1_7_11	455.934	1.63045	1.5387
NFKBIB	17	40	0.666667	MIA PaCa2	TNF	1	7_11	Rep1_7_11	453.104	1.61803	1.61562
NFKBIB	18	50	0.833333	MIA PaCa2	TNF	1	7_11	Rep1_7_11	446.956	1.60848	1.61262
NFKBIB	19	60	1	MIA PaCa2	TNF	1	7_11	Rep1_7_11	448.43	1.61356	1.60332
NFKBIB	20	70	1.16667	MIA PaCa2	TNF	1	7_11	Rep1_7_11	439.17	1.58872	1.59885
NFKBIB	21	80	1.33333	MIA PaCa2	TNF	1	7_11	Rep1_7_11	444.649	1.60785	1.59518
NFKBIB	22	90	1.5	MIA PaCa2	TNF	1	7_11	Rep1_7_11	434.432	1.55612	1.59236
NFKBIB	23	100	1.66667	MIA PaCa2	TNF	1	7_11	Rep1_7_11	440.995	1.59915	1.58925
NFKBIB	24	110	1.83333	MIA PaCa2	TNF	1	7_11	Rep1_7_11	441.762	1.59238	1.58894
NFKBIB	25	120	2	MIA PaCa2	TNF	1	7_11	Rep1_7_11	441.418	1.58876	1.58754
NFKBIB	26	130	2.16667	MIA PaCa2	TNF	1	7_11	Rep1_7_11	441.484	1.59178	1.59305
NFKBIB	27	140	2.33333	MIA PaCa2	TNF	1	7_11	Rep1_7_11	439.631	1.58655	1.59233
NFKBIB	28	150	2.5	MIA PaCa2	TNF	1	7_11	Rep1_7_11	440.821	1.59803	1.59121
NFKBIB	29	160	2.66667	MIA PaCa2	TNF	1	7_11	Rep1_7_11	440.669	1.59469	1.58741
NFKBIB	30	170	2.83333	MIA PaCa2	TNF	1	7_11	Rep1_7_11	439.166	1.59415	1.584
NFKBIB	31	180	3	MIA PaCa2	TNF	1	7_11	Rep1_7_11	438.558	1.5845	1.57943
NFKBIB	32	190	3.16667	MIA PaCa2	TNF	1	7_11	Rep1_7_11	433.156	1.56217	1.5746
NFKBIB	33	200	3.33333	MIA PaCa2	TNF	1	7_11	Rep1_7_11	434.157	1.56789	1.57042
NFKBIB	34	210	3.5	MIA PaCa2	TNF	1	7_11	Rep1_7_11	432.237	1.55461	1.56782
NFKBIB	35	220	3.66667	MIA PaCa2	TNF	1	7_11	Rep1_7_11	431.991	1.56419	1.56288
NFKBIB	36	230	3.83333	MIA PaCa2	TNF	1	7_11	Rep1_7_11	430.604	1.56546	1.55717
NFKBIB	37	240	4	MIA PaCa2	TNF	1	7_11	Rep1_7_11	431.631	1.57594	1.55371
NFKBIB	38	250	4.16667	MIA PaCa2	TNF	1	7_11	Rep1_7_11	432.524	1.54988	1.55171
NFKBIB	39	260	4.33333	MIA PaCa2	TNF	1	7_11	Rep1_7_11	422.719	1.52226	1.54884
NFKBIB	40	270	4.5	MIA PaCa2	TNF	1	7_11	Rep1_7_11	427.576	1.54364	1.54707
NFKBIB	41	280	4.66667	MIA PaCa2	TNF	1	7_11	Rep1_7_11	427.321	1.54061	1.54024
NFKBIB	42	290	4.83333	MIA PaCa2	TNF	1	7_11	Rep1_7_11	425.746	1.5441	1.53902
NFKBIB	43	300	5	MIA PaCa2	TNF	1	7_11	Rep1_7_11	426.967	1.55307	1.54147
NFKBIB	44	310	5.16667	MIA PaCa2	TNF	1	7_11	Rep1_7_11	425.645	1.52815	1.54243
NFKBIB	45	320	5.33333	MIA PaCa2	TNF	1	7_11	Rep1_7_11	423.938	1.54134	1.54003
NFKBIB	46	330	5.5	MIA PaCa2	TNF	1	7_11	Rep1_7_11	429.717	1.53942	1.54162
NFKBIB	47	340	5.66667	MIA PaCa2	TNF	1	7_11	Rep1_7_11	429.764	1.55035	1.54023
NFKBIB	48	350	5.83333	MIA PaCa2	TNF	1	7_11	Rep1_7_11	426.188	1.52377	1.54214
NFKBIB	49	360	6	MIA PaCa2	TNF	1	7_11	Rep1_7_11	431.117	1.55525	1.53883
NFKBIB	50	370	6.16667	MIA PaCa2	TNF	1	7_11	Rep1_7_11	431.68	1.54331	1.53708
NFKBIB	51	380	6.33333	MIA PaCa2	TNF	1	7_11	Rep1_7_11	432.467	1.54156	1.53418
NFKBIB	52	390	6.5	MIA PaCa2	TNF	1	7_11	Rep1_7_11	430.02	1.51814	1.53813
NFKBIB	53	400	6.66667	MIA PaCa2	TNF	1	7_11	Rep1_7_11	433.327	1.52717	1.53472
NFKBIB	54	410	6.83333	MIA PaCa2	TNF	1	7_11	Rep1_7_11	436.415	1.53008	1.53565
NFKBIB	55	420	7	MIA PaCa2	TNF	1	7_11	Rep1_7_11	436.925	1.55141	1.53502
NFKBIB	56	430	7.16667	MIA PaCa2	TNF	1	7_11	Rep1_7_11	434.645	1.53138	1.53727
NFKBIB	57	440	7.33333	MIA PaCa2	TNF	1	7_11	Rep1_7_11	440.065	1.54981	1.53712
NFKBIB	58	450	7.5	MIA PaCa2	TNF	1	7_11	Rep1_7_11	435.63	1.53717	1.53766
NFKBIB	59	460	7.66667	MIA PaCa2	TNF	1	7_11	Rep1_7_11	433.9	1.53387	1.53053
NFKBIB	60	470	7.83333	MIA PaCa2	TNF	1	7_11	Rep1_7_11	434.433	1.52612	1.52425
NFKBIB	61	480	8	MIA PaCa2	TNF	1	7_11	Rep1_7_11	437.081	1.53382	1.51508
NFKBIB	62	490	8.16667	MIA PaCa2	TNF	1	7_11	Rep1_7_11	425.224	1.50152	1.5067
NFKBIB	63	500	8.33333	MIA PaCa2	TNF	1	7_11	Rep1_7_11	423.886	1.48744	1.50017
NFKBIB	64	510	8.5	MIA PaCa2	TNF	1	7_11	Rep1_7_11	424.528	1.4856	1.48665
NFKBIB	65	520	8.66667	MIA PaCa2	TNF	1	7_11	Rep1_7_11	422.333	1.47856	1.47309
NFKBIB	66	530	8.83333	MIA PaCa2	TNF	1	7_11	Rep1_7_11	425.246	1.48812	1.46439
NFKBIB	67	540	9	MIA PaCa2	TNF	1	7_11	Rep1_7_11	410.758	1.43148	1.45575
NFKBIB	68	550	9.16667	MIA PaCa2	TNF	1	7_11	Rep1_7_11	411.383	1.43893	1.44925
NFKBIB	69	560	9.33333	MIA PaCa2	TNF	1	7_11	Rep1_7_11	410.719	1.44056	1.43716
NFKBIB	70	570	9.5	MIA PaCa2	TNF	1	7_11	Rep1_7_11	408.097	1.42701	1.42383
NFKBIB	71	580	9.66667	MIA PaCa2	TNF	1	7_11	Rep1_7_11	409.811	1.44009	1.41501
NFKBIB	72	590	9.83333	MIA PaCa2	TNF	1	7_11	Rep1_7_11	404.216	1.39391	1.40683
NFKBIB	73	600	10	MIA PaCa2	TNF	1	7_11	Rep1_7_11	403.373	1.39482	1.39399
NFKBIB	74	610	10.1667	MIA PaCa2	TNF	1	7_11	Rep1_7_11	400.811	1.36977	1.38201
NFKBIB	75	620	10.3333	MIA PaCa2	TNF	1	7_11	Rep1_7_11	400.627	1.38162	1.36718
NFKBIB	76	630	10.5	MIA PaCa2	TNF	1	7_11	Rep1_7_11	392.607	1.35067	1.36059
NFKBIB	77	640	10.6667	MIA PaCa2	TNF	1	7_11	Rep1_7_11	387.973	1.34321	1.3555
NFKBIB	78	650	10.8333	MIA PaCa2	TNF	1	7_11	Rep1_7_11	387.167	1.33627	1.35401
NFKBIB	79	660	11	MIA PaCa2	TNF	1	7_11	Rep1_7_11	389.954	1.3478	1.3506
NFKBIB	80	670	11.1667	MIA PaCa2	TNF	1	7_11	Rep1_7_11	392.034	1.35916	1.35356
NFKBIB	81	680	11.3333	MIA PaCa2	TNF	1	7_11	Rep1_7_11	393.861	1.35935	1.35318
NFKBIB	82	690	11.5	MIA PaCa2	TNF	1	7_11	Rep1_7_11	393.392	1.35777	1.3556
NFKBIB	83	700	11.6667	MIA PaCa2	TNF	1	7_11	Rep1_7_11	395.914	1.37135	1.35531
NFKBIB	84	710	11.8333	MIA PaCa2	TNF	1	7_11	Rep1_7_11	384.319	1.34059	1.35283
NFKBIB	85	720	12	MIA PaCa2	TNF	1	7_11	Rep1_7_11	389.931	1.3532	1.35034
NFKBIB	86	730	12.1667	MIA PaCa2	TNF	1	7_11	Rep1_7_11	391.387	1.34577	1.34785
NFKBIB	1	-120	-2	MIA PaCa2	Control	1	7_3	Rep1_7_3	319.133	1.0321	1.02899
NFKBIB	2	-110	-1.83333	MIA PaCa2	Control	1	7_3	Rep1_7_3	307.128	1.02169	1.02715
NFKBIB	3	-100	-1.66667	MIA PaCa2	Control	1	7_3	Rep1_7_3	307.152	1.02409	1.02531
NFKBIB	4	-90	-1.5	MIA PaCa2	Control	1	7_3	Rep1_7_3	299.712	1.02133	1.02347
NFKBIB	5	-80	-1.33333	MIA PaCa2	Control	1	7_3	Rep1_7_3	302.473	1.02688	1.02427
NFKBIB	6	-70	-1.16667	MIA PaCa2	Control	1	7_3	Rep1_7_3	298.426	1.02918	1.02572
NFKBIB	7	-60	-1	MIA PaCa2	Control	1	7_3	Rep1_7_3	294.221	1.009	1.02879
NFKBIB	8	-50	-0.833333	MIA PaCa2	Control	1	7_3	Rep1_7_3	299.278	1.03771	1.029
NFKBIB	9	-40	-0.666667	MIA PaCa2	Control	1	7_3	Rep1_7_3	296.269	1.03184	1.03002
NFKBIB	10	-30	-0.5	MIA PaCa2	Control	1	7_3	Rep1_7_3	297.767	1.04556	1.03185
NFKBIB	11	-20	-0.333333	MIA PaCa2	Control	1	7_3	Rep1_7_3	292.668	1.02282	1.03999
NFKBIB	12	-10	-0.166667	MIA PaCa2	Control	1	7_3	Rep1_7_3	293.352	1.03402	1.04103
NFKBIB	13	0	0	MIA PaCa2	Control	1	7_3	Rep1_7_3	295.191	1.04201	1.04233
NFKBIB	14	10	0.166667	MIA PaCa2	Control	1	7_3	Rep1_7_3	296.341	1.06596	1.04076
NFKBIB	15	20	0.333333	MIA PaCa2	Control	1	7_3	Rep1_7_3	294.463	1.04503	1.04412
NFKBIB	16	30	0.5	MIA PaCa2	Control	1	7_3	Rep1_7_3	291.083	1.04093	1.04495
NFKBIB	17	40	0.666667	MIA PaCa2	Control	1	7_3	Rep1_7_3	289.714	1.03457	1.04434
NFKBIB	18	50	0.833333	MIA PaCa2	Control	1	7_3	Rep1_7_3	290.75	1.04634	1.04014
NFKBIB	19	60	1	MIA PaCa2	Control	1	7_3	Rep1_7_3	288.986	1.03984	1.03741
NFKBIB	20	70	1.16667	MIA PaCa2	Control	1	7_3	Rep1_7_3	286.853	1.03771	1.03926
NFKBIB	21	80	1.33333	MIA PaCa2	Control	1	7_3	Rep1_7_3	286.668	1.03659	1.03963
NFKBIB	22	90	1.5	MIA PaCa2	Control	1	7_3	Rep1_7_3	286.398	1.02587	1.0376
NFKBIB	23	100	1.66667	MIA PaCa2	Control	1	7_3	Rep1_7_3	290.639	1.05392	1.03464
NFKBIB	24	110	1.83333	MIA PaCa2	Control	1	7_3	Rep1_7_3	287.73	1.03715	1.03453
NFKBIB	25	120	2	MIA PaCa2	Control	1	7_3	Rep1_7_3	286.76	1.03211	1.03602
NFKBIB	26	130	2.16667	MIA PaCa2	Control	1	7_3	Rep1_7_3	282.652	1.01911	1.03761
NFKBIB	27	140	2.33333	MIA PaCa2	Control	1	7_3	Rep1_7_3	287.341	1.03696	1.03629
NFKBIB	28	150	2.5	MIA PaCa2	Control	1	7_3	Rep1_7_3	288.815	1.04699	1.03656
NFKBIB	29	160	2.66667	MIA PaCa2	Control	1	7_3	Rep1_7_3	286.571	1.03704	1.03703
NFKBIB	30	170	2.83333	MIA PaCa2	Control	1	7_3	Rep1_7_3	287.792	1.04467	1.0406
NFKBIB	31	180	3	MIA PaCa2	Control	1	7_3	Rep1_7_3	287.582	1.03903	1.03902
NFKBIB	32	190	3.16667	MIA PaCa2	Control	1	7_3	Rep1_7_3	287.102	1.03543	1.03833
NFKBIB	33	200	3.33333	MIA PaCa2	Control	1	7_3	Rep1_7_3	289.115	1.04409	1.03781
NFKBIB	34	210	3.5	MIA PaCa2	Control	1	7_3	Rep1_7_3	285.227	1.02586	1.03975
NFKBIB	35	220	3.66667	MIA PaCa2	Control	1	7_3	Rep1_7_3	287.828	1.0422	1.03761
NFKBIB	36	230	3.83333	MIA PaCa2	Control	1	7_3	Rep1_7_3	284.255	1.03341	1.03798
NFKBIB	37	240	4	MIA PaCa2	Control	1	7_3	Rep1_7_3	289.834	1.05822	1.03701
NFKBIB	38	250	4.16667	MIA PaCa2	Control	1	7_3	Rep1_7_3	285.784	1.02406	1.03828
NFKBIB	39	260	4.33333	MIA PaCa2	Control	1	7_3	Rep1_7_3	288.258	1.03805	1.03903
NFKBIB	40	270	4.5	MIA PaCa2	Control	1	7_3	Rep1_7_3	287.324	1.0373	1.04176
NFKBIB	41	280	4.66667	MIA PaCa2	Control	1	7_3	Rep1_7_3	286.997	1.0347	1.0377
NFKBIB	42	290	4.83333	MIA PaCa2	Control	1	7_3	Rep1_7_3	288.805	1.04745	1.04085
NFKBIB	43	300	5	MIA PaCa2	Control	1	7_3	Rep1_7_3	289.366	1.05255	1.0393
NFKBIB	44	310	5.16667	MIA PaCa2	Control	1	7_3	Rep1_7_3	286.836	1.0298	1.04127
NFKBIB	45	320	5.33333	MIA PaCa2	Control	1	7_3	Rep1_7_3	287.736	1.04614	1.04048
NFKBIB	46	330	5.5	MIA PaCa2	Control	1	7_3	Rep1_7_3	286.722	1.02715	1.03857
NFKBIB	47	340	5.66667	MIA PaCa2	Control	1	7_3	Rep1_7_3	291.377	1.05113	1.03476
NFKBIB	48	350	5.83333	MIA PaCa2	Control	1	7_3	Rep1_7_3	287.856	1.02918	1.03341
NFKBIB	49	360	6	MIA PaCa2	Control	1	7_3	Rep1_7_3	286.646	1.03407	1.03077
NFKBIB	50	370	6.16667	MIA PaCa2	Control	1	7_3	Rep1_7_3	286.946	1.02586	1.02958
NFKBIB	51	380	6.33333	MIA PaCa2	Control	1	7_3	Rep1_7_3	286.239	1.02032	1.02491
NFKBIB	52	390	6.5	MIA PaCa2	Control	1	7_3	Rep1_7_3	291.098	1.02769	1.02447
NFKBIB	53	400	6.66667	MIA PaCa2	Control	1	7_3	Rep1_7_3	289.088	1.01883	1.02306
NFKBIB	54	410	6.83333	MIA PaCa2	Control	1	7_3	Rep1_7_3	290.471	1.0184	1.02124
NFKBIB	55	420	7	MIA PaCa2	Control	1	7_3	Rep1_7_3	288.987	1.02612	1.02278
NFKBIB	56	430	7.16667	MIA PaCa2	Control	1	7_3	Rep1_7_3	290.688	1.02418	1.02426
NFKBIB	57	440	7.33333	MIA PaCa2	Control	1	7_3	Rep1_7_3	287.686	1.01317	1.0239
NFKBIB	58	450	7.5	MIA PaCa2	Control	1	7_3	Rep1_7_3	292.21	1.03109	1.02462
NFKBIB	59	460	7.66667	MIA PaCa2	Control	1	7_3	Rep1_7_3	293.632	1.03801	1.02376
NFKBIB	60	470	7.83333	MIA PaCa2	Control	1	7_3	Rep1_7_3	289.312	1.01632	1.02364
NFKBIB	61	480	8	MIA PaCa2	Control	1	7_3	Rep1_7_3	291.646	1.02346	1.02321
NFKBIB	62	490	8.16667	MIA PaCa2	Control	1	7_3	Rep1_7_3	288.881	1.02007	1.01946
NFKBIB	63	500	8.33333	MIA PaCa2	Control	1	7_3	Rep1_7_3	291.639	1.02337	1.01752
NFKBIB	64	510	8.5	MIA PaCa2	Control	1	7_3	Rep1_7_3	288.657	1.01013	1.01536
NFKBIB	65	520	8.66667	MIA PaCa2	Control	1	7_3	Rep1_7_3	287.029	1.00487	1.01188
NFKBIB	66	530	8.83333	MIA PaCa2	Control	1	7_3	Rep1_7_3	292.737	1.02442	1.01072
NFKBIB	67	540	9	MIA PaCa2	Control	1	7_3	Rep1_7_3	287.292	1.0012	1.00809
NFKBIB	68	550	9.16667	MIA PaCa2	Control	1	7_3	Rep1_7_3	285.637	0.999099	1.00895
NFKBIB	69	560	9.33333	MIA PaCa2	Control	1	7_3	Rep1_7_3	288.508	1.01192	1.00935
NFKBIB	70	570	9.5	MIA PaCa2	Control	1	7_3	Rep1_7_3	287.406	1.00498	1.00738
NFKBIB	71	580	9.66667	MIA PaCa2	Control	1	7_3	Rep1_7_3	289.165	1.01614	1.00762
NFKBIB	72	590	9.83333	MIA PaCa2	Control	1	7_3	Rep1_7_3	292.217	1.00769	1.00904
NFKBIB	73	600	10	MIA PaCa2	Control	1	7_3	Rep1_7_3	292.271	1.01064	1.00792
NFKBIB	74	610	10.1667	MIA PaCa2	Control	1	7_3	Rep1_7_3	293.444	1.00285	1.00987
NFKBIB	75	620	10.3333	MIA PaCa2	Control	1	7_3	Rep1_7_3	292.59	1.00904	1.01021
NFKBIB	76	630	10.5	MIA PaCa2	Control	1	7_3	Rep1_7_3	291.876	1.00413	1.0117
NFKBIB	77	640	10.6667	MIA PaCa2	Control	1	7_3	Rep1_7_3	294.22	1.01863	1.01314
NFKBIB	78	650	10.8333	MIA PaCa2	Control	1	7_3	Rep1_7_3	295.089	1.01847	1.01463
NFKBIB	79	660	11	MIA PaCa2	Control	1	7_3	Rep1_7_3	294.568	1.01811	1.01585
NFKBIB	80	670	11.1667	MIA PaCa2	Control	1	7_3	Rep1_7_3	294.434	1.02078	1.01581
NFKBIB	81	680	11.3333	MIA PaCa2	Control	1	7_3	Rep1_7_3	293.584	1.01326	1.01526
NFKBIB	82	690	11.5	MIA PaCa2	Control	1	7_3	Rep1_7_3	294.826	1.01757	1.01595
NFKBIB	83	700	11.6667	MIA PaCa2	Control	1	7_3	Rep1_7_3	289.805	1.00382	1.01558
NFKBIB	84	710	11.8333	MIA PaCa2	Control	1	7_3	Rep1_7_3	290.931	1.01483	1.01563
NFKBIB	85	720	12	MIA PaCa2	Control	1	7_3	Rep1_7_3	294.854	1.02325	1.01569
NFKBIB	86	730	12.1667	MIA PaCa2	Control	1	7_3	Rep1_7_3	295.348	1.01554	1.01574
NFKBIB	1	-120	-2	MIA PaCa2	Control	1	7_4	Rep1_7_4	316.564	1.0238	1.03192
NFKBIB	2	-110	-1.83333	MIA PaCa2	Control	1	7_4	Rep1_7_4	308.5	1.02625	1.03037
NFKBIB	3	-100	-1.66667	MIA PaCa2	Control	1	7_4	Rep1_7_4	310.9	1.03659	1.02882
NFKBIB	4	-90	-1.5	MIA PaCa2	Control	1	7_4	Rep1_7_4	305.254	1.04021	1.02727
NFKBIB	5	-80	-1.33333	MIA PaCa2	Control	1	7_4	Rep1_7_4	302.913	1.02837	1.0259
NFKBIB	6	-70	-1.16667	MIA PaCa2	Control	1	7_4	Rep1_7_4	295.247	1.01822	1.02653
NFKBIB	7	-60	-1	MIA PaCa2	Control	1	7_4	Rep1_7_4	296.675	1.01741	1.02839
NFKBIB	8	-50	-0.833333	MIA PaCa2	Control	1	7_4	Rep1_7_4	292.518	1.01427	1.02716
NFKBIB	9	-40	-0.666667	MIA PaCa2	Control	1	7_4	Rep1_7_4	295.912	1.0306	1.02976
NFKBIB	10	-30	-0.5	MIA PaCa2	Control	1	7_4	Rep1_7_4	298.937	1.04967	1.03386
NFKBIB	11	-20	-0.333333	MIA PaCa2	Control	1	7_4	Rep1_7_4	295.174	1.03158	1.04154
NFKBIB	12	-10	-0.166667	MIA PaCa2	Control	1	7_4	Rep1_7_4	296.922	1.0466	1.0444
NFKBIB	13	0	0	MIA PaCa2	Control	1	7_4	Rep1_7_4	296.566	1.04686	1.04325
NFKBIB	14	10	0.166667	MIA PaCa2	Control	1	7_4	Rep1_7_4	297.802	1.07121	1.04134
NFKBIB	15	20	0.333333	MIA PaCa2	Control	1	7_4	Rep1_7_4	291.423	1.03425	1.04279
NFKBIB	16	30	0.5	MIA PaCa2	Control	1	7_4	Rep1_7_4	285.944	1.02256	1.04088
NFKBIB	17	40	0.666667	MIA PaCa2	Control	1	7_4	Rep1_7_4	290.199	1.0363	1.04067
NFKBIB	18	50	0.833333	MIA PaCa2	Control	1	7_4	Rep1_7_4	289.467	1.04172	1.03646
NFKBIB	19	60	1	MIA PaCa2	Control	1	7_4	Rep1_7_4	287.161	1.03328	1.03623
NFKBIB	20	70	1.16667	MIA PaCa2	Control	1	7_4	Rep1_7_4	288.978	1.04539	1.03752
NFKBIB	21	80	1.33333	MIA PaCa2	Control	1	7_4	Rep1_7_4	288.081	1.0417	1.03662
NFKBIB	22	90	1.5	MIA PaCa2	Control	1	7_4	Rep1_7_4	288.302	1.03269	1.03675
NFKBIB	23	100	1.66667	MIA PaCa2	Control	1	7_4	Rep1_7_4	284.469	1.03155	1.03761
NFKBIB	24	110	1.83333	MIA PaCa2	Control	1	7_4	Rep1_7_4	285.745	1.02999	1.03637
NFKBIB	25	120	2	MIA PaCa2	Control	1	7_4	Rep1_7_4	289.694	1.04267	1.03709
NFKBIB	26	130	2.16667	MIA PaCa2	Control	1	7_4	Rep1_7_4	288.247	1.03928	1.03874
NFKBIB	27	140	2.33333	MIA PaCa2	Control	1	7_4	Rep1_7_4	287.266	1.03669	1.04105
NFKBIB	28	150	2.5	MIA PaCa2	Control	1	7_4	Rep1_7_4	288.746	1.04674	1.04471
NFKBIB	29	160	2.66667	MIA PaCa2	Control	1	7_4	Rep1_7_4	288.568	1.04427	1.04636
NFKBIB	30	170	2.83333	MIA PaCa2	Control	1	7_4	Rep1_7_4	288.623	1.04768	1.0484
NFKBIB	31	180	3	MIA PaCa2	Control	1	7_4	Rep1_7_4	292.185	1.05566	1.05006
NFKBIB	32	190	3.16667	MIA PaCa2	Control	1	7_4	Rep1_7_4	292.315	1.05423	1.05135
NFKBIB	33	200	3.33333	MIA PaCa2	Control	1	7_4	Rep1_7_4	291.732	1.05355	1.05061
NFKBIB	34	210	3.5	MIA PaCa2	Control	1	7_4	Rep1_7_4	291.468	1.04831	1.04863
NFKBIB	35	220	3.66667	MIA PaCa2	Control	1	7_4	Rep1_7_4	291.575	1.05576	1.04368
NFKBIB	36	230	3.83333	MIA PaCa2	Control	1	7_4	Rep1_7_4	285.806	1.03905	1.03926
NFKBIB	37	240	4	MIA PaCa2	Control	1	7_4	Rep1_7_4	283.171	1.03389	1.03523
NFKBIB	38	250	4.16667	MIA PaCa2	Control	1	7_4	Rep1_7_4	284.923	1.02097	1.03305
NFKBIB	39	260	4.33333	MIA PaCa2	Control	1	7_4	Rep1_7_4	284.158	1.02329	1.02983
NFKBIB	40	270	4.5	MIA PaCa2	Control	1	7_4	Rep1_7_4	284.019	1.02537	1.03148
NFKBIB	41	280	4.66667	MIA PaCa2	Control	1	7_4	Rep1_7_4	286.524	1.03299	1.03253
NFKBIB	42	290	4.83333	MIA PaCa2	Control	1	7_4	Rep1_7_4	284.893	1.03326	1.03745
NFKBIB	43	300	5	MIA PaCa2	Control	1	7_4	Rep1_7_4	288.825	1.05058	1.03638
NFKBIB	44	310	5.16667	MIA PaCa2	Control	1	7_4	Rep1_7_4	290.034	1.04128	1.03785
NFKBIB	45	320	5.33333	MIA PaCa2	Control	1	7_4	Rep1_7_4	290.275	1.05537	1.03812
NFKBIB	46	330	5.5	MIA PaCa2	Control	1	7_4	Rep1_7_4	283.554	1.0158	1.04073
NFKBIB	47	340	5.66667	MIA PaCa2	Control	1	7_4	Rep1_7_4	287.093	1.03567	1.03949
NFKBIB	48	350	5.83333	MIA PaCa2	Control	1	7_4	Rep1_7_4	289.458	1.03491	1.03955
NFKBIB	49	360	6	MIA PaCa2	Control	1	7_4	Rep1_7_4	291.477	1.0515	1.03464
NFKBIB	50	370	6.16667	MIA PaCa2	Control	1	7_4	Rep1_7_4	291.423	1.04187	1.03519
NFKBIB	51	380	6.33333	MIA PaCa2	Control	1	7_4	Rep1_7_4	292.25	1.04174	1.03164
NFKBIB	52	390	6.5	MIA PaCa2	Control	1	7_4	Rep1_7_4	289.189	1.02095	1.03169
NFKBIB	53	400	6.66667	MIA PaCa2	Control	1	7_4	Rep1_7_4	289.33	1.01969	1.02913
NFKBIB	54	410	6.83333	MIA PaCa2	Control	1	7_4	Rep1_7_4	288.312	1.01083	1.02789
NFKBIB	55	420	7	MIA PaCa2	Control	1	7_4	Rep1_7_4	291.566	1.03528	1.02608
NFKBIB	56	430	7.16667	MIA PaCa2	Control	1	7_4	Rep1_7_4	293.347	1.03355	1.02852
NFKBIB	57	440	7.33333	MIA PaCa2	Control	1	7_4	Rep1_7_4	293.366	1.03317	1.02965
NFKBIB	58	450	7.5	MIA PaCa2	Control	1	7_4	Rep1_7_4	291.654	1.02913	1.03151
NFKBIB	59	460	7.66667	MIA PaCa2	Control	1	7_4	Rep1_7_4	293.62	1.03797	1.03172
NFKBIB	60	470	7.83333	MIA PaCa2	Control	1	7_4	Rep1_7_4	292.522	1.0276	1.0302
NFKBIB	61	480	8	MIA PaCa2	Control	1	7_4	Rep1_7_4	291.758	1.02385	1.02818
NFKBIB	62	490	8.16667	MIA PaCa2	Control	1	7_4	Rep1_7_4	293.616	1.03679	1.02832
NFKBIB	63	500	8.33333	MIA PaCa2	Control	1	7_4	Rep1_7_4	291.496	1.02287	1.02711
NFKBIB	64	510	8.5	MIA PaCa2	Control	1	7_4	Rep1_7_4	291.198	1.01902	1.02757
NFKBIB	65	520	8.66667	MIA PaCa2	Control	1	7_4	Rep1_7_4	294.248	1.03014	1.02721
NFKBIB	66	530	8.83333	MIA PaCa2	Control	1	7_4	Rep1_7_4	294.185	1.02948	1.02722
NFKBIB	67	540	9	MIA PaCa2	Control	1	7_4	Rep1_7_4	295.785	1.0308	1.02694
NFKBIB	68	550	9.16667	MIA PaCa2	Control	1	7_4	Rep1_7_4	292.008	1.02138	1.02672
NFKBIB	69	560	9.33333	MIA PaCa2	Control	1	7_4	Rep1_7_4	295.613	1.03684	1.02367
NFKBIB	70	570	9.5	MIA PaCa2	Control	1	7_4	Rep1_7_4	291.962	1.02092	1.02089
NFKBIB	71	580	9.66667	MIA PaCa2	Control	1	7_4	Rep1_7_4	289.538	1.01745	1.01527
NFKBIB	72	590	9.83333	MIA PaCa2	Control	1	7_4	Rep1_7_4	292.549	1.00883	1.01341
NFKBIB	73	600	10	MIA PaCa2	Control	1	7_4	Rep1_7_4	292.098	1.01004	1.00835
NFKBIB	74	610	10.1667	MIA PaCa2	Control	1	7_4	Rep1_7_4	290.096	0.991404	1.00681
NFKBIB	75	620	10.3333	MIA PaCa2	Control	1	7_4	Rep1_7_4	292.408	1.00841	1.00569
NFKBIB	76	630	10.5	MIA PaCa2	Control	1	7_4	Rep1_7_4	291.078	1.00138	1.00558
NFKBIB	77	640	10.6667	MIA PaCa2	Control	1	7_4	Rep1_7_4	291.768	1.01014	1.00352
NFKBIB	78	650	10.8333	MIA PaCa2	Control	1	7_4	Rep1_7_4	292.531	1.00964	1.00556
NFKBIB	79	660	11	MIA PaCa2	Control	1	7_4	Rep1_7_4	291.662	1.00807	1.00523
NFKBIB	80	670	11.1667	MIA PaCa2	Control	1	7_4	Rep1_7_4	287.157	0.995554	1.00851
NFKBIB	81	680	11.3333	MIA PaCa2	Control	1	7_4	Rep1_7_4	291.405	1.00574	1.01026
NFKBIB	82	690	11.5	MIA PaCa2	Control	1	7_4	Rep1_7_4	291.497	1.00608	1.01147
NFKBIB	83	700	11.6667	MIA PaCa2	Control	1	7_4	Rep1_7_4	295.727	1.02433	1.01358
NFKBIB	84	710	11.8333	MIA PaCa2	Control	1	7_4	Rep1_7_4	293.098	1.02239	1.01798
NFKBIB	85	720	12	MIA PaCa2	Control	1	7_4	Rep1_7_4	293.377	1.01813	1.02237
NFKBIB	86	730	12.1667	MIA PaCa2	Control	1	7_4	Rep1_7_4	297.476	1.02286	1.02676
NFKBIB	1	-120	-2	MIA PaCa2	Control	1	7_5	Rep1_7_5	319.206	1.03234	1.04035
NFKBIB	2	-110	-1.83333	MIA PaCa2	Control	1	7_5	Rep1_7_5	315.37	1.0491	1.03131
NFKBIB	3	-100	-1.66667	MIA PaCa2	Control	1	7_5	Rep1_7_5	303.412	1.01162	1.02227
NFKBIB	4	-90	-1.5	MIA PaCa2	Control	1	7_5	Rep1_7_5	300.465	1.02389	1.01322
NFKBIB	5	-80	-1.33333	MIA PaCa2	Control	1	7_5	Rep1_7_5	292.096	0.991653	1.00734
NFKBIB	6	-70	-1.16667	MIA PaCa2	Control	1	7_5	Rep1_7_5	287.026	0.989867	0.999023
NFKBIB	7	-60	-1	MIA PaCa2	Control	1	7_5	Rep1_7_5	289.872	0.994081	1.00107
NFKBIB	8	-50	-0.833333	MIA PaCa2	Control	1	7_5	Rep1_7_5	285.856	0.991172	0.998818
NFKBIB	9	-40	-0.666667	MIA PaCa2	Control	1	7_5	Rep1_7_5	284.505	0.990867	1.00027
NFKBIB	10	-30	-0.5	MIA PaCa2	Control	1	7_5	Rep1_7_5	292.182	1.02595	1.0034
NFKBIB	11	-20	-0.333333	MIA PaCa2	Control	1	7_5	Rep1_7_5	288.466	1.00813	1.00793
NFKBIB	12	-10	-0.166667	MIA PaCa2	Control	1	7_5	Rep1_7_5	284.215	1.00181	1.01213
NFKBIB	13	0	0	MIA PaCa2	Control	1	7_5	Rep1_7_5	286.638	1.01182	1.01692
NFKBIB	14	10	0.166667	MIA PaCa2	Control	1	7_5	Rep1_7_5	285.166	1.02576	1.01463
NFKBIB	15	20	0.333333	MIA PaCa2	Control	1	7_5	Rep1_7_5	287.559	1.02054	1.01407
NFKBIB	16	30	0.5	MIA PaCa2	Control	1	7_5	Rep1_7_5	286.473	1.02445	1.0129
NFKBIB	17	40	0.666667	MIA PaCa2	Control	1	7_5	Rep1_7_5	282.812	1.00992	1.01244
NFKBIB	18	50	0.833333	MIA PaCa2	Control	1	7_5	Rep1_7_5	279.038	1.00419	1.00749
NFKBIB	19	60	1	MIA PaCa2	Control	1	7_5	Rep1_7_5	276.137	0.993609	1.00142
NFKBIB	20	70	1.16667	MIA PaCa2	Control	1	7_5	Rep1_7_5	278.811	1.00861	0.997521
NFKBIB	21	80	1.33333	MIA PaCa2	Control	1	7_5	Rep1_7_5	274.096	0.991131	0.996833
NFKBIB	22	90	1.5	MIA PaCa2	Control	1	7_5	Rep1_7_5	273.033	0.977998	0.994457
NFKBIB	23	100	1.66667	MIA PaCa2	Control	1	7_5	Rep1_7_5	274.993	0.997187	0.997544
NFKBIB	24	110	1.83333	MIA PaCa2	Control	1	7_5	Rep1_7_5	278.84	1.00511	0.999648
NFKBIB	25	120	2	MIA PaCa2	Control	1	7_5	Rep1_7_5	274.381	0.987555	1.00239
NFKBIB	26	130	2.16667	MIA PaCa2	Control	1	7_5	Rep1_7_5	281.574	1.01522	1.00776
NFKBIB	27	140	2.33333	MIA PaCa2	Control	1	7_5	Rep1_7_5	283.566	1.02334	1.01055
NFKBIB	28	150	2.5	MIA PaCa2	Control	1	7_5	Rep1_7_5	278.7	1.01032	1.0111
NFKBIB	29	160	2.66667	MIA PaCa2	Control	1	7_5	Rep1_7_5	280.642	1.01559	1.01472
NFKBIB	30	170	2.83333	MIA PaCa2	Control	1	7_5	Rep1_7_5	280.096	1.01673	1.01487
NFKBIB	31	180	3	MIA PaCa2	Control	1	7_5	Rep1_7_5	279.25	1.00893	1.01486
NFKBIB	32	190	3.16667	MIA PaCa2	Control	1	7_5	Rep1_7_5	280.861	1.01292	1.01483
NFKBIB	33	200	3.33333	MIA PaCa2	Control	1	7_5	Rep1_7_5	281.413	1.01628	1.01624
NFKBIB	34	210	3.5	MIA PaCa2	Control	1	7_5	Rep1_7_5	284.509	1.02328	1.01866
NFKBIB	35	220	3.66667	MIA PaCa2	Control	1	7_5	Rep1_7_5	278.969	1.01012	1.01862
NFKBIB	36	230	3.83333	MIA PaCa2	Control	1	7_5	Rep1_7_5	282.062	1.02544	1.01784
NFKBIB	37	240	4	MIA PaCa2	Control	1	7_5	Rep1_7_5	283.103	1.03364	1.01584
NFKBIB	38	250	4.16667	MIA PaCa2	Control	1	7_5	Rep1_7_5	281.482	1.00864	1.01111
NFKBIB	39	260	4.33333	MIA PaCa2	Control	1	7_5	Rep1_7_5	279.775	1.0075	1.01076
NFKBIB	40	270	4.5	MIA PaCa2	Control	1	7_5	Rep1_7_5	277.621	1.00227	1.00911
NFKBIB	41	280	4.66667	MIA PaCa2	Control	1	7_5	Rep1_7_5	274.642	0.990157	1.00566
NFKBIB	42	290	4.83333	MIA PaCa2	Control	1	7_5	Rep1_7_5	277.838	1.00767	1.0079
NFKBIB	43	300	5	MIA PaCa2	Control	1	7_5	Rep1_7_5	278.732	1.01387	1.00656
NFKBIB	44	310	5.16667	MIA PaCa2	Control	1	7_5	Rep1_7_5	281.185	1.00951	1.00668
NFKBIB	45	320	5.33333	MIA PaCa2	Control	1	7_5	Rep1_7_5	281.736	1.02432	1.00824
NFKBIB	46	330	5.5	MIA PaCa2	Control	1	7_5	Rep1_7_5	278.612	0.998098	1.00929
NFKBIB	47	340	5.66667	MIA PaCa2	Control	1	7_5	Rep1_7_5	278.077	1.00315	1.00887
NFKBIB	48	350	5.83333	MIA PaCa2	Control	1	7_5	Rep1_7_5	279.995	1.00108	1.00795
NFKBIB	49	360	6	MIA PaCa2	Control	1	7_5	Rep1_7_5	281.361	1.01501	1.00406
NFKBIB	50	370	6.16667	MIA PaCa2	Control	1	7_5	Rep1_7_5	282.772	1.01094	1.00483
NFKBIB	51	380	6.33333	MIA PaCa2	Control	1	7_5	Rep1_7_5	281.387	1.00302	1.00353
NFKBIB	52	390	6.5	MIA PaCa2	Control	1	7_5	Rep1_7_5	282.437	0.997113	1.00318
NFKBIB	53	400	6.66667	MIA PaCa2	Control	1	7_5	Rep1_7_5	284.738	1.0035	0.99864
NFKBIB	54	410	6.83333	MIA PaCa2	Control	1	7_5	Rep1_7_5	283.533	0.994069	0.996335
NFKBIB	55	420	7	MIA PaCa2	Control	1	7_5	Rep1_7_5	281.243	0.998623	0.997081
NFKBIB	56	430	7.16667	MIA PaCa2	Control	1	7_5	Rep1_7_5	279.059	0.983209	0.996453
NFKBIB	57	440	7.33333	MIA PaCa2	Control	1	7_5	Rep1_7_5	282.473	0.994807	0.996791
NFKBIB	58	450	7.5	MIA PaCa2	Control	1	7_5	Rep1_7_5	285.735	1.00825	0.998367
NFKBIB	59	460	7.66667	MIA PaCa2	Control	1	7_5	Rep1_7_5	280.818	0.992714	0.999807
NFKBIB	60	470	7.83333	MIA PaCa2	Control	1	7_5	Rep1_7_5	286.336	1.00587	1.00262
NFKBIB	61	480	8	MIA PaCa2	Control	1	7_5	Rep1_7_5	286.414	1.0051	1.00432
NFKBIB	62	490	8.16667	MIA PaCa2	Control	1	7_5	Rep1_7_5	285.662	1.00871	1.00431
NFKBIB	63	500	8.33333	MIA PaCa2	Control	1	7_5	Rep1_7_5	285.801	1.00289	1.00595
NFKBIB	64	510	8.5	MIA PaCa2	Control	1	7_5	Rep1_7_5	287.68	1.00671	1.00503
NFKBIB	65	520	8.66667	MIA PaCa2	Control	1	7_5	Rep1_7_5	287.969	1.00816	1.00314
NFKBIB	66	530	8.83333	MIA PaCa2	Control	1	7_5	Rep1_7_5	286.962	1.00421	1.00146
NFKBIB	67	540	9	MIA PaCa2	Control	1	7_5	Rep1_7_5	286.782	0.999424	1.00155
NFKBIB	68	550	9.16667	MIA PaCa2	Control	1	7_5	Rep1_7_5	283.578	0.991899	1.00192
NFKBIB	69	560	9.33333	MIA PaCa2	Control	1	7_5	Rep1_7_5	284.24	0.996948	0.999431
NFKBIB	70	570	9.5	MIA PaCa2	Control	1	7_5	Rep1_7_5	286.983	1.0035	0.995895
NFKBIB	71	580	9.66667	MIA PaCa2	Control	1	7_5	Rep1_7_5	287.211	1.00927	0.990996
NFKBIB	72	590	9.83333	MIA PaCa2	Control	1	7_5	Rep1_7_5	287.308	0.990763	0.98771
NFKBIB	73	600	10	MIA PaCa2	Control	1	7_5	Rep1_7_5	283.253	0.979455	0.984123
NFKBIB	74	610	10.1667	MIA PaCa2	Control	1	7_5	Rep1_7_5	282.41	0.965136	0.982412
NFKBIB	75	620	10.3333	MIA PaCa2	Control	1	7_5	Rep1_7_5	280.949	0.968895	0.980062
NFKBIB	76	630	10.5	MIA PaCa2	Control	1	7_5	Rep1_7_5	282.489	0.971835	0.980258
NFKBIB	77	640	10.6667	MIA PaCa2	Control	1	7_5	Rep1_7_5	286.393	0.991529	0.981036
NFKBIB	78	650	10.8333	MIA PaCa2	Control	1	7_5	Rep1_7_5	287.657	0.99282	0.983984
NFKBIB	79	660	11	MIA PaCa2	Control	1	7_5	Rep1_7_5	287.05	0.992133	0.986922
NFKBIB	80	670	11.1667	MIA PaCa2	Control	1	7_5	Rep1_7_5	284.085	0.984903	0.989749
NFKBIB	81	680	11.3333	MIA PaCa2	Control	1	7_5	Rep1_7_5	285.621	0.985774	0.990806
NFKBIB	82	690	11.5	MIA PaCa2	Control	1	7_5	Rep1_7_5	286.68	0.989456	0.992047
NFKBIB	83	700	11.6667	MIA PaCa2	Control	1	7_5	Rep1_7_5	286.287	0.99163	0.991497
NFKBIB	84	710	11.8333	MIA PaCa2	Control	1	7_5	Rep1_7_5	286.37	0.998925	0.993321
NFKBIB	85	720	12	MIA PaCa2	Control	1	7_5	Rep1_7_5	288.588	1.00151	0.995145
NFKBIB	86	730	12.1667	MIA PaCa2	Control	1	7_5	Rep1_7_5	287.42	0.988286	0.99697
NFKBIB	1	-120	-2	MIA PaCa2	TNF	1	7_9	Rep1_7_9	316.424	1.02334	1.03499
NFKBIB	2	-110	-1.83333	MIA PaCa2	TNF	1	7_9	Rep1_7_9	311.629	1.03666	1.03289
NFKBIB	3	-100	-1.66667	MIA PaCa2	TNF	1	7_9	Rep1_7_9	311.847	1.03975	1.03079
NFKBIB	4	-90	-1.5	MIA PaCa2	TNF	1	7_9	Rep1_7_9	300.4	1.02367	1.02869
NFKBIB	5	-80	-1.33333	MIA PaCa2	TNF	1	7_9	Rep1_7_9	305.024	1.03554	1.02822
NFKBIB	6	-70	-1.16667	MIA PaCa2	TNF	1	7_9	Rep1_7_9	300.649	1.03685	1.02154
NFKBIB	7	-60	-1	MIA PaCa2	TNF	1	7_9	Rep1_7_9	293.057	1.005	1.02082
NFKBIB	8	-50	-0.833333	MIA PaCa2	TNF	1	7_9	Rep1_7_9	294.187	1.02006	1.02116
NFKBIB	9	-40	-0.666667	MIA PaCa2	TNF	1	7_9	Rep1_7_9	284.222	0.989882	1.02056
NFKBIB	10	-30	-0.5	MIA PaCa2	TNF	1	7_9	Rep1_7_9	294.68	1.03472	1.01663
NFKBIB	11	-20	-0.333333	MIA PaCa2	TNF	1	7_9	Rep1_7_9	293.593	1.02605	1.10349
NFKBIB	12	-10	-0.166667	MIA PaCa2	TNF	1	7_9	Rep1_7_9	292.591	1.03133	1.18942
NFKBIB	13	0	0	MIA PaCa2	TNF	1	7_9	Rep1_7_9	285.936	1.00934	1.28029
NFKBIB	14	10	0.166667	MIA PaCa2	TNF	1	7_9	Rep1_7_9	448.423	1.61301	1.36263
NFKBIB	15	20	0.333333	MIA PaCa2	TNF	1	7_9	Rep1_7_9	456.929	1.62162	1.44821
NFKBIB	16	30	0.5	MIA PaCa2	TNF	1	7_9	Rep1_7_9	454.667	1.62592	1.52988
NFKBIB	17	40	0.666667	MIA PaCa2	TNF	1	7_9	Rep1_7_9	451.165	1.61111	1.61511
NFKBIB	18	50	0.833333	MIA PaCa2	TNF	1	7_9	Rep1_7_9	451.578	1.62511	1.61397
NFKBIB	19	60	1	MIA PaCa2	TNF	1	7_9	Rep1_7_9	445.511	1.60306	1.60791
NFKBIB	20	70	1.16667	MIA PaCa2	TNF	1	7_9	Rep1_7_9	443.938	1.60597	1.60554
NFKBIB	21	80	1.33333	MIA PaCa2	TNF	1	7_9	Rep1_7_9	443.863	1.60501	1.60217
[truncated: 16,577 more rows]

## Sheet: Fig4 B
Well_ID	siRNA	Cell_line	Treatment	Bio_rep	Well	AUC
Rep1_10_10	RELB	MIA PaCa2	TNF	1	10_10	121.712
Rep1_10_11	RELB	MIA PaCa2	TNF	1	10_11	122.522
Rep1_10_12	RELB	PANC1	TNF	1	10_12	111.547
Rep1_10_13	RELB	PANC1	TNF	1	10_13	115.807
Rep1_10_14	RELB	PANC1	TNF	1	10_14	110.813
Rep1_10_3	RELB	MIA PaCa2	Control	1	10_3	86.0859
Rep1_10_4	RELB	MIA PaCa2	Control	1	10_4	86.6305
Rep1_10_5	RELB	MIA PaCa2	Control	1	10_5	86.2248
Rep1_10_6	RELB	PANC1	Control	1	10_6	88.0033
Rep1_10_7	RELB	PANC1	Control	1	10_7	88.5045
Rep1_10_8	RELB	PANC1	Control	1	10_8	88.5296
Rep1_10_9	RELB	MIA PaCa2	TNF	1	10_9	122.746
Rep1_11_10	NFKB2	MIA PaCa2	TNF	1	11_10	115.219
Rep1_11_11	NFKB2	MIA PaCa2	TNF	1	11_11	115.962
Rep1_11_12	NFKB2	PANC1	TNF	1	11_12	98.7369
Rep1_11_13	NFKB2	PANC1	TNF	1	11_13	97.356
Rep1_11_14	NFKB2	PANC1	TNF	1	11_14	101.001
Rep1_11_3	NFKB2	MIA PaCa2	Control	1	11_3	89.6871
Rep1_11_4	NFKB2	MIA PaCa2	Control	1	11_4	87.1171
Rep1_11_5	NFKB2	MIA PaCa2	Control	1	11_5	88.6262
Rep1_11_6	NFKB2	PANC1	Control	1	11_6	83.2063
Rep1_11_7	NFKB2	PANC1	Control	1	11_7	83.6472
Rep1_11_8	NFKB2	PANC1	Control	1	11_8	83.6189
Rep1_11_9	NFKB2	MIA PaCa2	TNF	1	11_9	113.956
Rep1_3_10	NT	MIA PaCa2	TNF	1	3_10	113.066
Rep1_3_11	NT	MIA PaCa2	TNF	1	3_11	113.836
Rep1_3_12	NT	PANC1	TNF	1	3_12	107.412
Rep1_3_13	NT	PANC1	TNF	1	3_13	105.78
Rep1_3_14	NT	PANC1	TNF	1	3_14	108.693
Rep1_3_3	NT	MIA PaCa2	Control	1	3_3	84.522
Rep1_3_4	NT	MIA PaCa2	Control	1	3_4	82.4704
Rep1_3_5	NT	MIA PaCa2	Control	1	3_5	88.1291
Rep1_3_6	NT	PANC1	Control	1	3_6	84.5474
Rep1_3_7	NT	PANC1	Control	1	3_7	86.7649
Rep1_3_8	NT	PANC1	Control	1	3_8	83.5528
Rep1_3_9	NT	MIA PaCa2	TNF	1	3_9	109.45
Rep1_4_10	ARHGAP31	MIA PaCa2	TNF	1	4_10	120.812
Rep1_4_11	ARHGAP31	MIA PaCa2	TNF	1	4_11	118.634
Rep1_4_12	ARHGAP31	PANC1	TNF	1	4_12	109.086
Rep1_4_13	ARHGAP31	PANC1	TNF	1	4_13	109.712
Rep1_4_14	ARHGAP31	PANC1	TNF	1	4_14	113.057
Rep1_4_3	ARHGAP31	MIA PaCa2	Control	1	4_3	86.6333
Rep1_4_4	ARHGAP31	MIA PaCa2	Control	1	4_4	92.1292
Rep1_4_5	ARHGAP31	MIA PaCa2	Control	1	4_5	86.5605
Rep1_4_6	ARHGAP31	PANC1	Control	1	4_6	86.9272
Rep1_4_7	ARHGAP31	PANC1	Control	1	4_7	87.2605
Rep1_4_8	ARHGAP31	PANC1	Control	1	4_8	86.734
Rep1_4_9	ARHGAP31	MIA PaCa2	TNF	1	4_9	117.64
Rep1_5_10	NUAK2	MIA PaCa2	TNF	1	5_10	111.077
Rep1_5_11	NUAK2	MIA PaCa2	TNF	1	5_11	111.065
Rep1_5_12	NUAK2	PANC1	TNF	1	5_12	97.6903
Rep1_5_13	NUAK2	PANC1	TNF	1	5_13	100.912
Rep1_5_14	NUAK2	PANC1	TNF	1	5_14	104.92
Rep1_5_3	NUAK2	MIA PaCa2	Control	1	5_3	86.183
Rep1_5_4	NUAK2	MIA PaCa2	Control	1	5_4	89.0069
Rep1_5_5	NUAK2	MIA PaCa2	Control	1	5_5	87.3621
Rep1_5_6	NUAK2	PANC1	Control	1	5_6	79.9135
Rep1_5_7	NUAK2	PANC1	Control	1	5_7	81.5714
Rep1_5_8	NUAK2	PANC1	Control	1	5_8	78.8054
Rep1_5_9	NUAK2	MIA PaCa2	TNF	1	5_9	110.222
Rep1_6_10	NFKBIA	MIA PaCa2	TNF	1	6_10	120.477
Rep1_6_11	NFKBIA	MIA PaCa2	TNF	1	6_11	121.927
Rep1_6_12	NFKBIA	PANC1	TNF	1	6_12	111.335
Rep1_6_13	NFKBIA	PANC1	TNF	1	6_13	118.144
Rep1_6_14	NFKBIA	PANC1	TNF	1	6_14	115.648
Rep1_6_3	NFKBIA	MIA PaCa2	Control	1	6_3	86.9446
Rep1_6_4	NFKBIA	MIA PaCa2	Control	1	6_4	89.1315
Rep1_6_5	NFKBIA	MIA PaCa2	Control	1	6_5	88.2455
Rep1_6_6	NFKBIA	PANC1	Control	1	6_6	87.5907
Rep1_6_7	NFKBIA	PANC1	Control	1	6_7	92.7381
Rep1_6_8	NFKBIA	PANC1	Control	1	6_8	90.3266
Rep1_6_9	NFKBIA	MIA PaCa2	TNF	1	6_9	118.792
Rep1_7_10	NFKBIB	MIA PaCa2	TNF	1	7_10	125.368
Rep1_7_11	NFKBIB	MIA PaCa2	TNF	1	7_11	122.256
Rep1_7_12	NFKBIB	PANC1	TNF	1	7_12	129.055
Rep1_7_13	NFKBIB	PANC1	TNF	1	7_13	125.74
Rep1_7_14	NFKBIB	PANC1	TNF	1	7_14	121.058
Rep1_7_3	NFKBIB	MIA PaCa2	Control	1	7_3	87.3685
Rep1_7_4	NFKBIB	MIA PaCa2	Control	1	7_4	87.5965
Rep1_7_5	NFKBIB	MIA PaCa2	Control	1	7_5	85.2867
Rep1_7_6	NFKBIB	PANC1	Control	1	7_6	89.2274
Rep1_7_7	NFKBIB	PANC1	Control	1	7_7	89.4444
Rep1_7_8	NFKBIB	PANC1	Control	1	7_8	90.4504
Rep1_7_9	NFKBIB	MIA PaCa2	TNF	1	7_9	122.006
Rep1_8_10	NFKBIE	MIA PaCa2	TNF	1	8_10	114.651
Rep1_8_11	NFKBIE	MIA PaCa2	TNF	1	8_11	114.285
Rep1_8_12	NFKBIE	PANC1	TNF	1	8_12	106.688
Rep1_8_13	NFKBIE	PANC1	TNF	1	8_13	98.0015
Rep1_8_14	NFKBIE	PANC1	TNF	1	8_14	104.899
Rep1_8_3	NFKBIE	MIA PaCa2	Control	1	8_3	84.7151
Rep1_8_4	NFKBIE	MIA PaCa2	Control	1	8_4	84.9209
Rep1_8_5	NFKBIE	MIA PaCa2	Control	1	8_5	84.2527
Rep1_8_6	NFKBIE	PANC1	Control	1	8_6	80.2481
Rep1_8_7	NFKBIE	PANC1	Control	1	8_7	81.8784
Rep1_8_8	NFKBIE	PANC1	Control	1	8_8	81.9433
Rep1_8_9	NFKBIE	MIA PaCa2	TNF	1	8_9	116.214
Rep1_9_10	RELA	MIA PaCa2	TNF	1	9_10	77.4289
Rep1_9_11	RELA	MIA PaCa2	TNF	1	9_11	78.3359
Rep1_9_12	RELA	PANC1	TNF	1	9_12	72.1298
Rep1_9_13	RELA	PANC1	TNF	1	9_13	72.0627
Rep1_9_14	RELA	PANC1	TNF	1	9_14	75.9018
Rep1_9_3	RELA	MIA PaCa2	Control	1	9_3	72.8954
Rep1_9_4	RELA	MIA PaCa2	Control	1	9_4	70.699
Rep1_9_5	RELA	MIA PaCa2	Control	1	9_5	71.5489
Rep1_9_6	RELA	PANC1	Control	1	9_6	69.2167
Rep1_9_7	RELA	PANC1	Control	1	9_7	67.9089
Rep1_9_8	RELA	PANC1	Control	1	9_8	68.3732
Rep1_9_9	RELA	MIA PaCa2	TNF	1	9_9	77.4053
Rep2_10_10	RELB	MIA PaCa2	TNF	2	10_10	117.094
Rep2_10_11	RELB	MIA PaCa2	TNF	2	10_11	120.342
Rep2_10_12	RELB	PANC1	TNF	2	10_12	109.874
Rep2_10_13	RELB	PANC1	TNF	2	10_13	115.197
Rep2_10_14	RELB	PANC1	TNF	2	10_14	109.292
Rep2_10_3	RELB	MIA PaCa2	Control	2	10_3	85.8711
Rep2_10_4	RELB	MIA PaCa2	Control	2	10_4	85.7553
Rep2_10_5	RELB	MIA PaCa2	Control	2	10_5	88.1941
Rep2_10_6	RELB	PANC1	Control	2	10_6	86.9141
Rep2_10_7	RELB	PANC1	Control	2	10_7	87.6164
Rep2_10_8	RELB	PANC1	Control	2	10_8	88.1666
Rep2_10_9	RELB	MIA PaCa2	TNF	2	10_9	115.329
Rep2_11_10	NFKB2	MIA PaCa2	TNF	2	11_10	111.736
Rep2_11_11	NFKB2	MIA PaCa2	TNF	2	11_11	109.838
Rep2_11_12	NFKB2	PANC1	TNF	2	11_12	93.5922
Rep2_11_13	NFKB2	PANC1	TNF	2	11_13	93.4381
Rep2_11_14	NFKB2	PANC1	TNF	2	11_14	98.0564
Rep2_11_3	NFKB2	MIA PaCa2	Control	2	11_3	88.7969
Rep2_11_4	NFKB2	MIA PaCa2	Control	2	11_4	86.7359
Rep2_11_5	NFKB2	MIA PaCa2	Control	2	11_5	89.0642
Rep2_11_6	NFKB2	PANC1	Control	2	11_6	80.6269
Rep2_11_7	NFKB2	PANC1	Control	2	11_7	82.5432
Rep2_11_8	NFKB2	PANC1	Control	2	11_8	80.2003
Rep2_11_9	NFKB2	MIA PaCa2	TNF	2	11_9	111.26
Rep2_3_10	NT	MIA PaCa2	TNF	2	3_10	110.539
Rep2_3_11	NT	MIA PaCa2	TNF	2	3_11	106.964
Rep2_3_12	NT	PANC1	TNF	2	3_12	105.051
Rep2_3_13	NT	PANC1	TNF	2	3_13	102.454
Rep2_3_14	NT	PANC1	TNF	2	3_14	100.807
Rep2_3_3	NT	MIA PaCa2	Control	2	3_3	85.2653
Rep2_3_4	NT	MIA PaCa2	Control	2	3_4	84.1145
Rep2_3_5	NT	MIA PaCa2	Control	2	3_5	85.7679
Rep2_3_6	NT	PANC1	Control	2	3_6	85.1266
Rep2_3_7	NT	PANC1	Control	2	3_7	85.6613
Rep2_3_8	NT	PANC1	Control	2	3_8	84.1156
Rep2_3_9	NT	MIA PaCa2	TNF	2	3_9	113.915
Rep2_4_10	ARHGAP31	MIA PaCa2	TNF	2	4_10	114.572
Rep2_4_11	ARHGAP31	MIA PaCa2	TNF	2	4_11	116.353
Rep2_4_12	ARHGAP31	PANC1	TNF	2	4_12	109.55
Rep2_4_13	ARHGAP31	PANC1	TNF	2	4_13	117.561
Rep2_4_14	ARHGAP31	PANC1	TNF	2	4_14	117.038
Rep2_4_3	ARHGAP31	MIA PaCa2	Control	2	4_3	86.6977
Rep2_4_4	ARHGAP31	MIA PaCa2	Control	2	4_4	86.5382
Rep2_4_5	ARHGAP31	MIA PaCa2	Control	2	4_5	86.4984
Rep2_4_6	ARHGAP31	PANC1	Control	2	4_6	87.5721
Rep2_4_7	ARHGAP31	PANC1	Control	2	4_7	88.362
Rep2_4_8	ARHGAP31	PANC1	Control	2	4_8	88.1143
Rep2_4_9	ARHGAP31	MIA PaCa2	TNF	2	4_9	115.342
Rep2_5_10	NUAK2	MIA PaCa2	TNF	2	5_10	110.268
Rep2_5_11	NUAK2	MIA PaCa2	TNF	2	5_11	112.751
Rep2_5_12	NUAK2	PANC1	TNF	2	5_12	102.005
Rep2_5_13	NUAK2	PANC1	TNF	2	5_13	104.379
Rep2_5_14	NUAK2	PANC1	TNF	2	5_14	110.095
Rep2_5_3	NUAK2	MIA PaCa2	Control	2	5_3	85.2813
Rep2_5_4	NUAK2	MIA PaCa2	Control	2	5_4	86.7132
Rep2_5_5	NUAK2	MIA PaCa2	Control	2	5_5	86.5217
Rep2_5_6	NUAK2	PANC1	Control	2	5_6	81.2702
Rep2_5_7	NUAK2	PANC1	Control	2	5_7	84.1433
Rep2_5_8	NUAK2	PANC1	Control	2	5_8	82.2453
Rep2_5_9	NUAK2	MIA PaCa2	TNF	2	5_9	115.431
Rep2_6_10	NFKBIA	MIA PaCa2	TNF	2	6_10	114.737
Rep2_6_11	NFKBIA	MIA PaCa2	TNF	2	6_11	116.774
Rep2_6_12	NFKBIA	PANC1	TNF	2	6_12	118.124
Rep2_6_13	NFKBIA	PANC1	TNF	2	6_13	116.865
Rep2_6_14	NFKBIA	PANC1	TNF	2	6_14	117.85
Rep2_6_3	NFKBIA	MIA PaCa2	Control	2	6_3	86.6993
Rep2_6_4	NFKBIA	MIA PaCa2	Control	2	6_4	86.1408
Rep2_6_5	NFKBIA	MIA PaCa2	Control	2	6_5	88.6808
Rep2_6_6	NFKBIA	PANC1	Control	2	6_6	88.5312
Rep2_6_7	NFKBIA	PANC1	Control	2	6_7	92.1568
Rep2_6_8	NFKBIA	PANC1	Control	2	6_8	89.9768
Rep2_6_9	NFKBIA	MIA PaCa2	TNF	2	6_9	111.23
Rep2_7_10	NFKBIB	MIA PaCa2	TNF	2	7_10	122.082
Rep2_7_11	NFKBIB	MIA PaCa2	TNF	2	7_11	122.791
Rep2_7_12	NFKBIB	PANC1	TNF	2	7_12	123.618
Rep2_7_13	NFKBIB	PANC1	TNF	2	7_13	122.302
Rep2_7_14	NFKBIB	PANC1	TNF	2	7_14	126.209
Rep2_7_3	NFKBIB	MIA PaCa2	Control	2	7_3	88.0469
Rep2_7_4	NFKBIB	MIA PaCa2	Control	2	7_4	84.9743
Rep2_7_5	NFKBIB	MIA PaCa2	Control	2	7_5	83.2378
Rep2_7_6	NFKBIB	PANC1	Control	2	7_6	94.153
Rep2_7_7	NFKBIB	PANC1	Control	2	7_7	89.5396
Rep2_7_8	NFKBIB	PANC1	Control	2	7_8	90.2114
Rep2_7_9	NFKBIB	MIA PaCa2	TNF	2	7_9	122.655
Rep2_8_10	NFKBIE	MIA PaCa2	TNF	2	8_10	111.154
Rep2_8_11	NFKBIE	MIA PaCa2	TNF	2	8_11	113.631
Rep2_8_12	NFKBIE	PANC1	TNF	2	8_12	102.758
Rep2_8_13	NFKBIE	PANC1	TNF	2	8_13	104.255
Rep2_8_14	NFKBIE	PANC1	TNF	2	8_14	100.486
Rep2_8_3	NFKBIE	MIA PaCa2	Control	2	8_3	82.8383
Rep2_8_4	NFKBIE	MIA PaCa2	Control	2	8_4	84.1125
Rep2_8_5	NFKBIE	MIA PaCa2	Control	2	8_5	80.7694
Rep2_8_6	NFKBIE	PANC1	Control	2	8_6	81.7248
Rep2_8_7	NFKBIE	PANC1	Control	2	8_7	81.7184
Rep2_8_8	NFKBIE	PANC1	Control	2	8_8	82.2858
Rep2_8_9	NFKBIE	MIA PaCa2	TNF	2	8_9	113.313
Rep2_9_10	RELA	MIA PaCa2	TNF	2	9_10	75.9236
Rep2_9_11	RELA	MIA PaCa2	TNF	2	9_11	76.2012
Rep2_9_12	RELA	PANC1	TNF	2	9_12	65.7055
Rep2_9_13	RELA	PANC1	TNF	2	9_13	66.0274
Rep2_9_14	RELA	PANC1	TNF	2	9_14	66.7316
Rep2_9_3	RELA	MIA PaCa2	Control	2	9_3	67.8113
Rep2_9_4	RELA	MIA PaCa2	Control	2	9_4	68.3023
Rep2_9_5	RELA	MIA PaCa2	Control	2	9_5	71.2095
Rep2_9_6	RELA	PANC1	Control	2	9_6	62.1463
Rep2_9_7	RELA	PANC1	Control	2	9_7	62.2927
Rep2_9_8	RELA	PANC1	Control	2	9_8	61.6592
Rep2_9_9	RELA	MIA PaCa2	TNF	2	9_9	76.3693

## Sheet: Fig4Supp1
probed_gene	siRNA	TNF_ngml	normalised_RNA_abundance
RELA	NT	0	1
RELA	NT	10	1.47
RELA	RELA	10	0.0521
RELB	NT	0	1
RELB	NT	10	4.54
RELB	RELB	10	2.06
NFKB2	NT	0	1
NFKB2	NT	10	2.07
NFKB2	NFKB2	10	0.976
NFKBIA	NT	0	1
NFKBIA	NT	10	12.9
NFKBIA	NFKBIA	10	1.8
NFKBIB	NT	0	1
NFKBIB	NT	10	2.53
NFKBIB	NFKBIB	10	0.0994
NFKBIE	NT	0	1
NFKBIE	NT	10	4.2
NFKBIE	NFKBIE	10	1.07
ARHGAP31	NT	0	1
ARHGAP31	NT	10
ARHGAP31	ARHGAP31	10	0.566
NUAK2	NT	0	1
NUAK2	NT	10	3.04
NUAK2	NUAK2	10	1.63

## Sheet: Fig4Supp2
siRNA	Timepoint	Time_after_TNF_min	Time_after_TNF_hr	Cell_line	Treatment	Bio_rep	Well	Well_ID	Nuc_RELA_mean	Nuc_RELA_norm	Nuc_RELA_SG
ARHGAP31	1	-120	-2	MIA PaCa2	TNF	1	4_10	Rep1_4_10	311.781	1.00833	1.01166
ARHGAP31	2	-110	-1.83333	MIA PaCa2	TNF	1	4_10	Rep1_4_10	305.835	1.01738	1.00901
ARHGAP31	3	-100	-1.66667	MIA PaCa2	TNF	1	4_10	Rep1_4_10	297.824	0.992993	1.00636
ARHGAP31	4	-90	-1.5	MIA PaCa2	TNF	1	4_10	Rep1_4_10	298.887	1.01852	1.00371
ARHGAP31	5	-80	-1.33333	MIA PaCa2	TNF	1	4_10	Rep1_4_10	290.045	0.984689	1.00437
ARHGAP31	6	-70	-1.16667	MIA PaCa2	TNF	1	4_10	Rep1_4_10	295.282	1.01834	1.00204
ARHGAP31	7	-60	-1	MIA PaCa2	TNF	1	4_10	Rep1_4_10	287.437	0.985733	1.00115
ARHGAP31	8	-50	-0.833333	MIA PaCa2	TNF	1	4_10	Rep1_4_10	292.127	1.01292	0.998211
ARHGAP31	9	-40	-0.666667	MIA PaCa2	TNF	1	4_10	Rep1_4_10	287.444	1.0011	1.00296
ARHGAP31	10	-30	-0.5	MIA PaCa2	TNF	1	4_10	Rep1_4_10	281.016	0.986741	1.00007
ARHGAP31	11	-20	-0.333333	MIA PaCa2	TNF	1	4_10	Rep1_4_10	285.552	0.997949	1.08363
ARHGAP31	12	-10	-0.166667	MIA PaCa2	TNF	1	4_10	Rep1_4_10	288.783	1.01791	1.16696
ARHGAP31	13	0	0	MIA PaCa2	TNF	1	4_10	Rep1_4_10	282.764	0.99814	1.25121
ARHGAP31	14	10	0.166667	MIA PaCa2	TNF	1	4_10	Rep1_4_10	436.639	1.57062	1.3361
ARHGAP31	15	20	0.333333	MIA PaCa2	TNF	1	4_10	Rep1_4_10	449.782	1.59626	1.42139
ARHGAP31	16	30	0.5	MIA PaCa2	TNF	1	4_10	Rep1_4_10	444.864	1.59087	1.50257
ARHGAP31	17	40	0.666667	MIA PaCa2	TNF	1	4_10	Rep1_4_10	442.72	1.58095	1.58655
ARHGAP31	18	50	0.833333	MIA PaCa2	TNF	1	4_10	Rep1_4_10	443.204	1.59498	1.58725
ARHGAP31	19	60	1	MIA PaCa2	TNF	1	4_10	Rep1_4_10	440.826	1.5862	1.58244
ARHGAP31	20	70	1.16667	MIA PaCa2	TNF	1	4_10	Rep1_4_10	438.414	1.58599	1.58021
ARHGAP31	21	80	1.33333	MIA PaCa2	TNF	1	4_10	Rep1_4_10	435.698	1.57548	1.57714
ARHGAP31	22	90	1.5	MIA PaCa2	TNF	1	4_10	Rep1_4_10	436.234	1.56258	1.57023
ARHGAP31	23	100	1.66667	MIA PaCa2	TNF	1	4_10	Rep1_4_10	434.425	1.57532	1.56499
ARHGAP31	24	110	1.83333	MIA PaCa2	TNF	1	4_10	Rep1_4_10	432.617	1.55941	1.55778
ARHGAP31	25	120	2	MIA PaCa2	TNF	1	4_10	Rep1_4_10	429.715	1.54664	1.55294
ARHGAP31	26	130	2.16667	MIA PaCa2	TNF	1	4_10	Rep1_4_10	429.757	1.5495	1.54693
ARHGAP31	27	140	2.33333	MIA PaCa2	TNF	1	4_10	Rep1_4_10	425.497	1.53554	1.54032
ARHGAP31	28	150	2.5	MIA PaCa2	TNF	1	4_10	Rep1_4_10	425.244	1.54157	1.53679
ARHGAP31	29	160	2.66667	MIA PaCa2	TNF	1	4_10	Rep1_4_10	420.168	1.5205	1.53259
ARHGAP31	30	170	2.83333	MIA PaCa2	TNF	1	4_10	Rep1_4_10	421.245	1.5291	1.52784
ARHGAP31	31	180	3	MIA PaCa2	TNF	1	4_10	Rep1_4_10	424.777	1.53471	1.5236
ARHGAP31	32	190	3.16667	MIA PaCa2	TNF	1	4_10	Rep1_4_10	420.702	1.51725	1.51979
ARHGAP31	33	200	3.33333	MIA PaCa2	TNF	1	4_10	Rep1_4_10	419.84	1.51619	1.5156
ARHGAP31	34	210	3.5	MIA PaCa2	TNF	1	4_10	Rep1_4_10	418.699	1.50592	1.50902
ARHGAP31	35	220	3.66667	MIA PaCa2	TNF	1	4_10	Rep1_4_10	418.363	1.51485	1.49534
ARHGAP31	36	230	3.83333	MIA PaCa2	TNF	1	4_10	Rep1_4_10	410.176	1.49119	1.48728
ARHGAP31	37	240	4	MIA PaCa2	TNF	1	4_10	Rep1_4_10	406.19	1.48305	1.47917
ARHGAP31	38	250	4.16667	MIA PaCa2	TNF	1	4_10	Rep1_4_10	401.57	1.43896	1.47326
ARHGAP31	39	260	4.33333	MIA PaCa2	TNF	1	4_10	Rep1_4_10	405.655	1.46081	1.46834
ARHGAP31	40	270	4.5	MIA PaCa2	TNF	1	4_10	Rep1_4_10	404.25	1.45943	1.46562
ARHGAP31	41	280	4.66667	MIA PaCa2	TNF	1	4_10	Rep1_4_10	406.228	1.46456	1.4626
ARHGAP31	42	290	4.83333	MIA PaCa2	TNF	1	4_10	Rep1_4_10	408.181	1.4804	1.46913
ARHGAP31	43	300	5	MIA PaCa2	TNF	1	4_10	Rep1_4_10	404.71	1.47211	1.46977
ARHGAP31	44	310	5.16667	MIA PaCa2	TNF	1	4_10	Rep1_4_10	407.208	1.46195	1.47401
ARHGAP31	45	320	5.33333	MIA PaCa2	TNF	1	4_10	Rep1_4_10	408.348	1.48466	1.47884
ARHGAP31	46	330	5.5	MIA PaCa2	TNF	1	4_10	Rep1_4_10	409.032	1.46532	1.47666
ARHGAP31	47	340	5.66667	MIA PaCa2	TNF	1	4_10	Rep1_4_10	412.778	1.48908	1.47652
ARHGAP31	48	350	5.83333	MIA PaCa2	TNF	1	4_10	Rep1_4_10	419.085	1.49837	1.47511
ARHGAP31	49	360	6	MIA PaCa2	TNF	1	4_10	Rep1_4_10	406.13	1.46511	1.46815
ARHGAP31	50	370	6.16667	MIA PaCa2	TNF	1	4_10	Rep1_4_10	411.502	1.47117	1.46774
ARHGAP31	51	380	6.33333	MIA PaCa2	TNF	1	4_10	Rep1_4_10	407.364	1.45208	1.45876
ARHGAP31	52	390	6.5	MIA PaCa2	TNF	1	4_10	Rep1_4_10	406.732	1.43592	1.45352
ARHGAP31	53	400	6.66667	MIA PaCa2	TNF	1	4_10	Rep1_4_10	414.954	1.46242	1.45319
ARHGAP31	54	410	6.83333	MIA PaCa2	TNF	1	4_10	Rep1_4_10	406.799	1.42624	1.45233
ARHGAP31	55	420	7	MIA PaCa2	TNF	1	4_10	Rep1_4_10	411.651	1.46167	1.45716
ARHGAP31	56	430	7.16667	MIA PaCa2	TNF	1	4_10	Rep1_4_10	415.18	1.4628	1.46447
ARHGAP31	57	440	7.33333	MIA PaCa2	TNF	1	4_10	Rep1_4_10	416.027	1.46516	1.46726
ARHGAP31	58	450	7.5	MIA PaCa2	TNF	1	4_10	Rep1_4_10	421.109	1.48593	1.47537
ARHGAP31	59	460	7.66667	MIA PaCa2	TNF	1	4_10	Rep1_4_10	420.666	1.48709	1.48213
ARHGAP31	60	470	7.83333	MIA PaCa2	TNF	1	4_10	Rep1_4_10	421.856	1.48194	1.49442
ARHGAP31	61	480	8	MIA PaCa2	TNF	1	4_10	Rep1_4_10	422.595	1.48299	1.49354
ARHGAP31	62	490	8.16667	MIA PaCa2	TNF	1	4_10	Rep1_4_10	427.337	1.50898	1.49264
ARHGAP31	63	500	8.33333	MIA PaCa2	TNF	1	4_10	Rep1_4_10	441.4	1.5489	1.49234
ARHGAP31	64	510	8.5	MIA PaCa2	TNF	1	4_10	Rep1_4_10	416.922	1.45898	1.49876
ARHGAP31	65	520	8.66667	MIA PaCa2	TNF	1	4_10	Rep1_4_10	422.626	1.47958	1.49771
ARHGAP31	66	530	8.83333	MIA PaCa2	TNF	1	4_10	Rep1_4_10	424.353	1.485	1.49496
ARHGAP31	67	540	9	MIA PaCa2	TNF	1	4_10	Rep1_4_10	438.147	1.52693	1.48406
ARHGAP31	68	550	9.16667	MIA PaCa2	TNF	1	4_10	Rep1_4_10	421.858	1.47557	1.4843
ARHGAP31	69	560	9.33333	MIA PaCa2	TNF	1	4_10	Rep1_4_10	424.74	1.48974	1.48361
ARHGAP31	70	570	9.5	MIA PaCa2	TNF	1	4_10	Rep1_4_10	421.142	1.47262	1.48168
ARHGAP31	71	580	9.66667	MIA PaCa2	TNF	1	4_10	Rep1_4_10	415.666	1.46067	1.46906
ARHGAP31	72	590	9.83333	MIA PaCa2	TNF	1	4_10	Rep1_4_10	427.658	1.47475	1.46662
ARHGAP31	73	600	10	MIA PaCa2	TNF	1	4_10	Rep1_4_10	425.546	1.47149	1.46084
ARHGAP31	74	610	10.1667	MIA PaCa2	TNF	1	4_10	Rep1_4_10	420.948	1.43859	1.46349
ARHGAP31	75	620	10.3333	MIA PaCa2	TNF	1	4_10	Rep1_4_10	422.922	1.45851	1.4568
ARHGAP31	76	630	10.5	MIA PaCa2	TNF	1	4_10	Rep1_4_10	421.271	1.44928	1.45004
ARHGAP31	77	640	10.6667	MIA PaCa2	TNF	1	4_10	Rep1_4_10	430.706	1.49116	1.4458
ARHGAP31	78	650	10.8333	MIA PaCa2	TNF	1	4_10	Rep1_4_10	409.639	1.41383	1.44626
ARHGAP31	79	660	11	MIA PaCa2	TNF	1	4_10	Rep1_4_10	412.989	1.42742	1.43579
ARHGAP31	80	670	11.1667	MIA PaCa2	TNF	1	4_10	Rep1_4_10	415.867	1.44179	1.43492
ARHGAP31	81	680	11.3333	MIA PaCa2	TNF	1	4_10	Rep1_4_10	417.757	1.44182	1.43802
ARHGAP31	82	690	11.5	MIA PaCa2	TNF	1	4_10	Rep1_4_10	401.344	1.38521	1.44245
ARHGAP31	83	700	11.6667	MIA PaCa2	TNF	1	4_10	Rep1_4_10	416.669	1.44325	1.43973
ARHGAP31	84	710	11.8333	MIA PaCa2	TNF	1	4_10	Rep1_4_10	433.703	1.51286	1.44093
ARHGAP31	85	720	12	MIA PaCa2	TNF	1	4_10	Rep1_4_10	416.335	1.44483	1.44212
ARHGAP31	86	730	12.1667	MIA PaCa2	TNF	1	4_10	Rep1_4_10	409.592	1.40837	1.44331
ARHGAP31	1	-120	-2	MIA PaCa2	TNF	1	4_11	Rep1_4_11	322.613	1.04336	1.05145
ARHGAP31	2	-110	-1.83333	MIA PaCa2	TNF	1	4_11	Rep1_4_11	318.721	1.06025	1.04607
ARHGAP31	3	-100	-1.66667	MIA PaCa2	TNF	1	4_11	Rep1_4_11	312.508	1.04195	1.0407
ARHGAP31	4	-90	-1.5	MIA PaCa2	TNF	1	4_11	Rep1_4_11	300.478	1.02394	1.03532
ARHGAP31	5	-80	-1.33333	MIA PaCa2	TNF	1	4_11	Rep1_4_11	302.142	1.02576	1.03373
ARHGAP31	6	-70	-1.16667	MIA PaCa2	TNF	1	4_11	Rep1_4_11	301.487	1.03974	1.02851
ARHGAP31	7	-60	-1	MIA PaCa2	TNF	1	4_11	Rep1_4_11	295.175	1.01227	1.02425
ARHGAP31	8	-50	-0.833333	MIA PaCa2	TNF	1	4_11	Rep1_4_11	297.698	1.03223	1.02402
ARHGAP31	9	-40	-0.666667	MIA PaCa2	TNF	1	4_11	Rep1_4_11	293.932	1.0237	1.02604
ARHGAP31	10	-30	-0.5	MIA PaCa2	TNF	1	4_11	Rep1_4_11	288.241	1.01211	1.02571
ARHGAP31	11	-20	-0.333333	MIA PaCa2	TNF	1	4_11	Rep1_4_11	292.533	1.02235	1.11145
ARHGAP31	12	-10	-0.166667	MIA PaCa2	TNF	1	4_11	Rep1_4_11	295.013	1.03987	1.19327
ARHGAP31	13	0	0	MIA PaCa2	TNF	1	4_11	Rep1_4_11	293.903	1.03746	1.2791
ARHGAP31	14	10	0.166667	MIA PaCa2	TNF	1	4_11	Rep1_4_11	448.27	1.61246	1.36534
ARHGAP31	15	20	0.333333	MIA PaCa2	TNF	1	4_11	Rep1_4_11	452.227	1.60493	1.4515
ARHGAP31	16	30	0.5	MIA PaCa2	TNF	1	4_11	Rep1_4_11	454.27	1.6245	1.53321
ARHGAP31	17	40	0.666667	MIA PaCa2	TNF	1	4_11	Rep1_4_11	452.488	1.61583	1.61568
ARHGAP31	18	50	0.833333	MIA PaCa2	TNF	1	4_11	Rep1_4_11	451.667	1.62544	1.61051
ARHGAP31	19	60	1	MIA PaCa2	TNF	1	4_11	Rep1_4_11	447.952	1.61184	1.60643
ARHGAP31	20	70	1.16667	MIA PaCa2	TNF	1	4_11	Rep1_4_11	446.359	1.61473	1.59539
ARHGAP31	21	80	1.33333	MIA PaCa2	TNF	1	4_11	Rep1_4_11	435.929	1.57632	1.58789
ARHGAP31	22	90	1.5	MIA PaCa2	TNF	1	4_11	Rep1_4_11	440.076	1.57634	1.58143
ARHGAP31	23	100	1.66667	MIA PaCa2	TNF	1	4_11	Rep1_4_11	426.671	1.54721	1.57581
ARHGAP31	24	110	1.83333	MIA PaCa2	TNF	1	4_11	Rep1_4_11	433.72	1.56339	1.56682
ARHGAP31	25	120	2	MIA PaCa2	TNF	1	4_11	Rep1_4_11	439.033	1.58017	1.56503
ARHGAP31	26	130	2.16667	MIA PaCa2	TNF	1	4_11	Rep1_4_11	436.142	1.57252	1.56336
ARHGAP31	27	140	2.33333	MIA PaCa2	TNF	1	4_11	Rep1_4_11	430.009	1.55182	1.56754
ARHGAP31	28	150	2.5	MIA PaCa2	TNF	1	4_11	Rep1_4_11	431.367	1.56376	1.56788
ARHGAP31	29	160	2.66667	MIA PaCa2	TNF	1	4_11	Rep1_4_11	432.362	1.56463	1.56002
ARHGAP31	30	170	2.83333	MIA PaCa2	TNF	1	4_11	Rep1_4_11	434.293	1.57646	1.55535
ARHGAP31	31	180	3	MIA PaCa2	TNF	1	4_11	Rep1_4_11	433.386	1.56582	1.55254
ARHGAP31	32	190	3.16667	MIA PaCa2	TNF	1	4_11	Rep1_4_11	422.885	1.52513	1.54785
ARHGAP31	33	200	3.33333	MIA PaCa2	TNF	1	4_11	Rep1_4_11	426.391	1.53985	1.54339
ARHGAP31	34	210	3.5	MIA PaCa2	TNF	1	4_11	Rep1_4_11	425.995	1.53216	1.53553
ARHGAP31	35	220	3.66667	MIA PaCa2	TNF	1	4_11	Rep1_4_11	422.798	1.5309	1.52366
ARHGAP31	36	230	3.83333	MIA PaCa2	TNF	1	4_11	Rep1_4_11	421.792	1.53342	1.51877
ARHGAP31	37	240	4	MIA PaCa2	TNF	1	4_11	Rep1_4_11	416.713	1.52147	1.51083
ARHGAP31	38	250	4.16667	MIA PaCa2	TNF	1	4_11	Rep1_4_11	413.784	1.48272	1.5039
ARHGAP31	39	260	4.33333	MIA PaCa2	TNF	1	4_11	Rep1_4_11	414.002	1.49087	1.49604
ARHGAP31	40	270	4.5	MIA PaCa2	TNF	1	4_11	Rep1_4_11	411.135	1.48428	1.48981
ARHGAP31	41	280	4.66667	MIA PaCa2	TNF	1	4_11	Rep1_4_11	411.52	1.48364	1.48127
ARHGAP31	42	290	4.83333	MIA PaCa2	TNF	1	4_11	Rep1_4_11	406.933	1.47587	1.47904
ARHGAP31	43	300	5	MIA PaCa2	TNF	1	4_11	Rep1_4_11	409.58	1.48982	1.47225
ARHGAP31	44	310	5.16667	MIA PaCa2	TNF	1	4_11	Rep1_4_11	407.139	1.46171	1.46397
ARHGAP31	45	320	5.33333	MIA PaCa2	TNF	1	4_11	Rep1_4_11	403.523	1.46711	1.45693
ARHGAP31	46	330	5.5	MIA PaCa2	TNF	1	4_11	Rep1_4_11	402.901	1.44335	1.45249
ARHGAP31	47	340	5.66667	MIA PaCa2	TNF	1	4_11	Rep1_4_11	395.372	1.42629	1.44462
ARHGAP31	48	350	5.83333	MIA PaCa2	TNF	1	4_11	Rep1_4_11	401.188	1.43438	1.44087
ARHGAP31	49	360	6	MIA PaCa2	TNF	1	4_11	Rep1_4_11	400.496	1.44479	1.43265
ARHGAP31	50	370	6.16667	MIA PaCa2	TNF	1	4_11	Rep1_4_11	401.312	1.43474	1.42714
ARHGAP31	51	380	6.33333	MIA PaCa2	TNF	1	4_11	Rep1_4_11	402.688	1.43541	1.42546
ARHGAP31	52	390	6.5	MIA PaCa2	TNF	1	4_11	Rep1_4_11	399.282	1.40962	1.42069
ARHGAP31	53	400	6.66667	MIA PaCa2	TNF	1	4_11	Rep1_4_11	398.587	1.40474	1.41576
ARHGAP31	54	410	6.83333	MIA PaCa2	TNF	1	4_11	Rep1_4_11	403.469	1.41457	1.41076
ARHGAP31	55	420	7	MIA PaCa2	TNF	1	4_11	Rep1_4_11	394.551	1.40095	1.4073
ARHGAP31	56	430	7.16667	MIA PaCa2	TNF	1	4_11	Rep1_4_11	400.286	1.41033	1.40622
ARHGAP31	57	440	7.33333	MIA PaCa2	TNF	1	4_11	Rep1_4_11	397.454	1.39974	1.40476
ARHGAP31	58	450	7.5	MIA PaCa2	TNF	1	4_11	Rep1_4_11	399.908	1.41112	1.40422
ARHGAP31	59	460	7.66667	MIA PaCa2	TNF	1	4_11	Rep1_4_11	396.627	1.40211	1.40521
ARHGAP31	60	470	7.83333	MIA PaCa2	TNF	1	4_11	Rep1_4_11	396.973	1.39453	1.40465
ARHGAP31	61	480	8	MIA PaCa2	TNF	1	4_11	Rep1_4_11	402.019	1.41078	1.40331
ARHGAP31	62	490	8.16667	MIA PaCa2	TNF	1	4_11	Rep1_4_11	398.709	1.40789	1.40369
ARHGAP31	63	500	8.33333	MIA PaCa2	TNF	1	4_11	Rep1_4_11	400.784	1.40637	1.40231
ARHGAP31	64	510	8.5	MIA PaCa2	TNF	1	4_11	Rep1_4_11	397.306	1.39034	1.40137
ARHGAP31	65	520	8.66667	MIA PaCa2	TNF	1	4_11	Rep1_4_11	403.848	1.41385	1.39775
ARHGAP31	66	530	8.83333	MIA PaCa2	TNF	1	4_11	Rep1_4_11	397.889	1.39239	1.3926
ARHGAP31	67	540	9	MIA PaCa2	TNF	1	4_11	Rep1_4_11	398.27	1.38796	1.38638
ARHGAP31	68	550	9.16667	MIA PaCa2	TNF	1	4_11	Rep1_4_11	396.087	1.38543	1.38493
ARHGAP31	69	560	9.33333	MIA PaCa2	TNF	1	4_11	Rep1_4_11	391.13	1.37185	1.37738
ARHGAP31	70	570	9.5	MIA PaCa2	TNF	1	4_11	Rep1_4_11	389.747	1.36284	1.37627
ARHGAP31	71	580	9.66667	MIA PaCa2	TNF	1	4_11	Rep1_4_11	392.759	1.38017	1.37122
ARHGAP31	72	590	9.83333	MIA PaCa2	TNF	1	4_11	Rep1_4_11	394.682	1.36103	1.36721
ARHGAP31	73	600	10	MIA PaCa2	TNF	1	4_11	Rep1_4_11	400.414	1.38459	1.3605
ARHGAP31	74	610	10.1667	MIA PaCa2	TNF	1	4_11	Rep1_4_11	395.793	1.35262	1.36232
ARHGAP31	75	620	10.3333	MIA PaCa2	TNF	1	4_11	Rep1_4_11	393.594	1.35737	1.35759
ARHGAP31	76	630	10.5	MIA PaCa2	TNF	1	4_11	Rep1_4_11	385.107	1.32487	1.35902
ARHGAP31	77	640	10.6667	MIA PaCa2	TNF	1	4_11	Rep1_4_11	397.329	1.3756	1.35533
ARHGAP31	78	650	10.8333	MIA PaCa2	TNF	1	4_11	Rep1_4_11	390.286	1.34703	1.35303
ARHGAP31	79	660	11	MIA PaCa2	TNF	1	4_11	Rep1_4_11	396.682	1.37105	1.35188
ARHGAP31	80	670	11.1667	MIA PaCa2	TNF	1	4_11	Rep1_4_11	391.929	1.35879	1.35023
ARHGAP31	81	680	11.3333	MIA PaCa2	TNF	1	4_11	Rep1_4_11	387.236	1.33648	1.3448
ARHGAP31	82	690	11.5	MIA PaCa2	TNF	1	4_11	Rep1_4_11	390.943	1.34931	1.34513
ARHGAP31	83	700	11.6667	MIA PaCa2	TNF	1	4_11	Rep1_4_11	379.157	1.31331	1.34097
ARHGAP31	84	710	11.8333	MIA PaCa2	TNF	1	4_11	Rep1_4_11	383.46	1.3376	1.33966
ARHGAP31	85	720	12	MIA PaCa2	TNF	1	4_11	Rep1_4_11	388.82	1.34935	1.33836
ARHGAP31	86	730	12.1667	MIA PaCa2	TNF	1	4_11	Rep1_4_11	390.27	1.34193	1.33705
ARHGAP31	1	-120	-2	MIA PaCa2	Control	1	4_3	Rep1_4_3	329.767	1.0665	1.04534
ARHGAP31	2	-110	-1.83333	MIA PaCa2	Control	1	4_3	Rep1_4_3	310.866	1.03412	1.03897
ARHGAP31	3	-100	-1.66667	MIA PaCa2	Control	1	4_3	Rep1_4_3	302.391	1.00822	1.0326
ARHGAP31	4	-90	-1.5	MIA PaCa2	Control	1	4_3	Rep1_4_3	299.207	1.01961	1.02623
ARHGAP31	5	-80	-1.33333	MIA PaCa2	Control	1	4_3	Rep1_4_3	300.641	1.02066	1.01862
ARHGAP31	6	-70	-1.16667	MIA PaCa2	Control	1	4_3	Rep1_4_3	297.659	1.02654	1.01581
ARHGAP31	7	-60	-1	MIA PaCa2	Control	1	4_3	Rep1_4_3	293.918	1.00796	1.02105
ARHGAP31	8	-50	-0.833333	MIA PaCa2	Control	1	4_3	Rep1_4_3	292.217	1.01323	1.02007
ARHGAP31	9	-40	-0.666667	MIA PaCa2	Control	1	4_3	Rep1_4_3	291.286	1.01448	1.02513
ARHGAP31	10	-30	-0.5	MIA PaCa2	Control	1	4_3	Rep1_4_3	297.566	1.04486	1.02527
ARHGAP31	11	-20	-0.333333	MIA PaCa2	Control	1	4_3	Rep1_4_3	289.798	1.01279	1.02926
ARHGAP31	12	-10	-0.166667	MIA PaCa2	Control	1	4_3	Rep1_4_3	299.609	1.05607	1.03253
ARHGAP31	13	0	0	MIA PaCa2	Control	1	4_3	Rep1_4_3	291.083	1.02751	1.03649
ARHGAP31	14	10	0.166667	MIA PaCa2	Control	1	4_3	Rep1_4_3	287.985	1.0359	1.03416
ARHGAP31	15	20	0.333333	MIA PaCa2	Control	1	4_3	Rep1_4_3	291.947	1.03611	1.03634
ARHGAP31	16	30	0.5	MIA PaCa2	Control	1	4_3	Rep1_4_3	291.433	1.04219	1.03282
ARHGAP31	17	40	0.666667	MIA PaCa2	Control	1	4_3	Rep1_4_3	288.04	1.02859	1.03182
ARHGAP31	18	50	0.833333	MIA PaCa2	Control	1	4_3	Rep1_4_3	285.653	1.02799	1.03185
ARHGAP31	19	60	1	MIA PaCa2	Control	1	4_3	Rep1_4_3	286.645	1.03142	1.02749
ARHGAP31	20	70	1.16667	MIA PaCa2	Control	1	4_3	Rep1_4_3	282.116	1.02057	1.02442
ARHGAP31	21	80	1.33333	MIA PaCa2	Control	1	4_3	Rep1_4_3	286.535	1.03611	1.02359
ARHGAP31	22	90	1.5	MIA PaCa2	Control	1	4_3	Rep1_4_3	280.723	1.00554	1.02188
ARHGAP31	23	100	1.66667	MIA PaCa2	Control	1	4_3	Rep1_4_3	281.49	1.02075	1.01945
ARHGAP31	24	110	1.83333	MIA PaCa2	Control	1	4_3	Rep1_4_3	283.739	1.02276	1.02031
ARHGAP31	25	120	2	MIA PaCa2	Control	1	4_3	Rep1_4_3	282.291	1.01603	1.02
ARHGAP31	26	130	2.16667	MIA PaCa2	Control	1	4_3	Rep1_4_3	281.34	1.01438	1.02364
ARHGAP31	27	140	2.33333	MIA PaCa2	Control	1	4_3	Rep1_4_3	284.476	1.02662	1.02771
ARHGAP31	28	150	2.5	MIA PaCa2	Control	1	4_3	Rep1_4_3	285.202	1.03389	1.02774
ARHGAP31	29	160	2.66667	MIA PaCa2	Control	1	4_3	Rep1_4_3	284.915	1.03105	1.02795
ARHGAP31	30	170	2.83333	MIA PaCa2	Control	1	4_3	Rep1_4_3	289.05	1.04923	1.02788
ARHGAP31	31	180	3	MIA PaCa2	Control	1	4_3	Rep1_4_3	283.142	1.02299	1.0266
ARHGAP31	32	190	3.16667	MIA PaCa2	Control	1	4_3	Rep1_4_3	282.127	1.01748	1.02606
ARHGAP31	33	200	3.33333	MIA PaCa2	Control	1	4_3	Rep1_4_3	280.749	1.01388	1.02545
ARHGAP31	34	210	3.5	MIA PaCa2	Control	1	4_3	Rep1_4_3	282.956	1.0177	1.02482
ARHGAP31	35	220	3.66667	MIA PaCa2	Control	1	4_3	Rep1_4_3	284.479	1.03007	1.02502
ARHGAP31	36	230	3.83333	MIA PaCa2	Control	1	4_3	Rep1_4_3	282.44	1.02681	1.02603
ARHGAP31	37	240	4	MIA PaCa2	Control	1	4_3	Rep1_4_3	286.163	1.04482	1.0267
ARHGAP31	38	250	4.16667	MIA PaCa2	Control	1	4_3	Rep1_4_3	285.868	1.02436	1.02846
ARHGAP31	39	260	4.33333	MIA PaCa2	Control	1	4_3	Rep1_4_3	284.521	1.02459	1.02883
ARHGAP31	40	270	4.5	MIA PaCa2	Control	1	4_3	Rep1_4_3	282.134	1.01856	1.03082
ARHGAP31	41	280	4.66667	MIA PaCa2	Control	1	4_3	Rep1_4_3	285.7	1.03002	1.02864
ARHGAP31	42	290	4.83333	MIA PaCa2	Control	1	4_3	Rep1_4_3	284.726	1.03265	1.02834
ARHGAP31	43	300	5	MIA PaCa2	Control	1	4_3	Rep1_4_3	286.111	1.04071	1.02703
ARHGAP31	44	310	5.16667	MIA PaCa2	Control	1	4_3	Rep1_4_3	286.783	1.0296	1.02556
ARHGAP31	45	320	5.33333	MIA PaCa2	Control	1	4_3	Rep1_4_3	281.157	1.02222	1.02335
ARHGAP31	46	330	5.5	MIA PaCa2	Control	1	4_3	Rep1_4_3	283.453	1.01544	1.02063
ARHGAP31	47	340	5.66667	MIA PaCa2	Control	1	4_3	Rep1_4_3	279.497	1.00827	1.0164
ARHGAP31	48	350	5.83333	MIA PaCa2	Control	1	4_3	Rep1_4_3	283.773	1.01458	1.01349
ARHGAP31	49	360	6	MIA PaCa2	Control	1	4_3	Rep1_4_3	280.967	1.01359	1.01302
ARHGAP31	50	370	6.16667	MIA PaCa2	Control	1	4_3	Rep1_4_3	282.815	1.0111	1.01071
ARHGAP31	51	380	6.33333	MIA PaCa2	Control	1	4_3	Rep1_4_3	283.13	1.00924	1.00974
ARHGAP31	52	390	6.5	MIA PaCa2	Control	1	4_3	Rep1_4_3	288.606	1.01889	1.01118
ARHGAP31	53	400	6.66667	MIA PaCa2	Control	1	4_3	Rep1_4_3	283.539	0.999275	1.01102
ARHGAP31	54	410	6.83333	MIA PaCa2	Control	1	4_3	Rep1_4_3	285.647	1.00148	1.00845
ARHGAP31	55	420	7	MIA PaCa2	Control	1	4_3	Rep1_4_3	288.58	1.02467	1.00592
ARHGAP31	56	430	7.16667	MIA PaCa2	Control	1	4_3	Rep1_4_3	287.36	1.01245	1.00283
ARHGAP31	57	440	7.33333	MIA PaCa2	Control	1	4_3	Rep1_4_3	282.002	0.993149	1.00422
ARHGAP31	58	450	7.5	MIA PaCa2	Control	1	4_3	Rep1_4_3	280.998	0.991531	1.00527
ARHGAP31	59	460	7.66667	MIA PaCa2	Control	1	4_3	Rep1_4_3	282.1	0.997247	1.00297
ARHGAP31	60	470	7.83333	MIA PaCa2	Control	1	4_3	Rep1_4_3	287.222	1.00898	1.00297
ARHGAP31	61	480	8	MIA PaCa2	Control	1	4_3	Rep1_4_3	287.475	1.00882	1.00448
ARHGAP31	62	490	8.16667	MIA PaCa2	Control	1	4_3	Rep1_4_3	285.64	1.00863	1.007
ARHGAP31	63	500	8.33333	MIA PaCa2	Control	1	4_3	Rep1_4_3	288.52	1.01243	1.01034
ARHGAP31	64	510	8.5	MIA PaCa2	Control	1	4_3	Rep1_4_3	286.828	1.00373	1.01247
ARHGAP31	65	520	8.66667	MIA PaCa2	Control	1	4_3	Rep1_4_3	288.26	1.00918	1.01145
ARHGAP31	66	530	8.83333	MIA PaCa2	Control	1	4_3	Rep1_4_3	291.659	1.02064	1.01257
ARHGAP31	67	540	9	MIA PaCa2	Control	1	4_3	Rep1_4_3	293.798	1.02387	1.01313
ARHGAP31	68	550	9.16667	MIA PaCa2	Control	1	4_3	Rep1_4_3	286.365	1.00165	1.01679
ARHGAP31	69	560	9.33333	MIA PaCa2	Control	1	4_3	Rep1_4_3	289.807	1.01647	1.0147
ARHGAP31	70	570	9.5	MIA PaCa2	Control	1	4_3	Rep1_4_3	290.666	1.01638	1.0118
ARHGAP31	71	580	9.66667	MIA PaCa2	Control	1	4_3	Rep1_4_3	292.918	1.02933	1.00876
ARHGAP31	72	590	9.83333	MIA PaCa2	Control	1	4_3	Rep1_4_3	288.399	0.994526	1.00793
ARHGAP31	73	600	10	MIA PaCa2	Control	1	4_3	Rep1_4_3	289.306	1.00039	1.00598
ARHGAP31	74	610	10.1667	MIA PaCa2	Control	1	4_3	Rep1_4_3	293.373	1.0026	1.00755
ARHGAP31	75	620	10.3333	MIA PaCa2	Control	1	4_3	Rep1_4_3	288.763	0.995845	1.00566
ARHGAP31	76	630	10.5	MIA PaCa2	Control	1	4_3	Rep1_4_3	291.478	1.00276	1.00811
ARHGAP31	77	640	10.6667	MIA PaCa2	Control	1	4_3	Rep1_4_3	296.759	1.02742	1.01007
ARHGAP31	78	650	10.8333	MIA PaCa2	Control	1	4_3	Rep1_4_3	294.404	1.0161	1.01081
ARHGAP31	79	660	11	MIA PaCa2	Control	1	4_3	Rep1_4_3	292.705	1.01168	1.00901
ARHGAP31	80	670	11.1667	MIA PaCa2	Control	1	4_3	Rep1_4_3	292.497	1.01407	1.00885
ARHGAP31	81	680	11.3333	MIA PaCa2	Control	1	4_3	Rep1_4_3	291.998	1.00778	1.0095
ARHGAP31	82	690	11.5	MIA PaCa2	Control	1	4_3	Rep1_4_3	284.881	0.983246	1.01175
ARHGAP31	83	700	11.6667	MIA PaCa2	Control	1	4_3	Rep1_4_3	289.184	1.00167	1.01392
ARHGAP31	84	710	11.8333	MIA PaCa2	Control	1	4_3	Rep1_4_3	295.831	1.03193	1.01875
ARHGAP31	85	720	12	MIA PaCa2	Control	1	4_3	Rep1_4_3	297.331	1.03185	1.02358
ARHGAP31	86	730	12.1667	MIA PaCa2	Control	1	4_3	Rep1_4_3	298.647	1.02689	1.02841
ARHGAP31	1	-120	-2	MIA PaCa2	Control	1	4_4	Rep1_4_4	341.802	1.10542	1.11082
ARHGAP31	2	-110	-1.83333	MIA PaCa2	Control	1	4_4	Rep1_4_4	331.436	1.10255	1.10802
ARHGAP31	3	-100	-1.66667	MIA PaCa2	Control	1	4_4	Rep1_4_4	329.411	1.09831	1.10522
ARHGAP31	4	-90	-1.5	MIA PaCa2	Control	1	4_4	Rep1_4_4	331.314	1.12902	1.10241
ARHGAP31	5	-80	-1.33333	MIA PaCa2	Control	1	4_4	Rep1_4_4	324.676	1.10226	1.09632
ARHGAP31	6	-70	-1.16667	MIA PaCa2	Control	1	4_4	Rep1_4_4	318.694	1.09908	1.09301
ARHGAP31	7	-60	-1	MIA PaCa2	Control	1	4_4	Rep1_4_4	315.002	1.08026	1.09148
ARHGAP31	8	-50	-0.833333	MIA PaCa2	Control	1	4_4	Rep1_4_4	306.508	1.06278	1.08662
ARHGAP31	9	-40	-0.666667	MIA PaCa2	Control	1	4_4	Rep1_4_4	309.915	1.07937	1.08546
ARHGAP31	10	-30	-0.5	MIA PaCa2	Control	1	4_4	Rep1_4_4	309.737	1.08759	1.08672
ARHGAP31	11	-20	-0.333333	MIA PaCa2	Control	1	4_4	Rep1_4_4	313.314	1.09497	1.08671
ARHGAP31	12	-10	-0.166667	MIA PaCa2	Control	1	4_4	Rep1_4_4	310.423	1.09419	1.08781
ARHGAP31	13	0	0	MIA PaCa2	Control	1	4_4	Rep1_4_4	313.851	1.10788	1.09119
ARHGAP31	14	10	0.166667	MIA PaCa2	Control	1	4_4	Rep1_4_4	300.302	1.08021	1.0911
ARHGAP31	15	20	0.333333	MIA PaCa2	Control	1	4_4	Rep1_4_4	301.636	1.07049	1.09179
ARHGAP31	16	30	0.5	MIA PaCa2	Control	1	4_4	Rep1_4_4	308.447	1.10303	1.09192
ARHGAP31	17	40	0.666667	MIA PaCa2	Control	1	4_4	Rep1_4_4	304.385	1.08696	1.08901
ARHGAP31	18	50	0.833333	MIA PaCa2	Control	1	4_4	Rep1_4_4	305.598	1.09977	1.08785
ARHGAP31	19	60	1	MIA PaCa2	Control	1	4_4	Rep1_4_4	304.347	1.09512	1.08824
ARHGAP31	20	70	1.16667	MIA PaCa2	Control	1	4_4	Rep1_4_4	300.625	1.08753	1.08686
ARHGAP31	21	80	1.33333	MIA PaCa2	Control	1	4_4	Rep1_4_4	296.472	1.07204	1.08796
ARHGAP31	22	90	1.5	MIA PaCa2	Control	1	4_4	Rep1_4_4	299.619	1.07323	1.08546
ARHGAP31	23	100	1.66667	MIA PaCa2	Control	1	4_4	Rep1_4_4	301.518	1.09337	1.08296
ARHGAP31	24	110	1.83333	MIA PaCa2	Control	1	4_4	Rep1_4_4	303.687	1.09467	1.08087
ARHGAP31	25	120	2	MIA PaCa2	Control	1	4_4	Rep1_4_4	300.687	1.08224	1.08611
ARHGAP31	26	130	2.16667	MIA PaCa2	Control	1	4_4	Rep1_4_4	298.876	1.0776	1.08905
ARHGAP31	27	140	2.33333	MIA PaCa2	Control	1	4_4	Rep1_4_4	297.299	1.0729	1.09035
ARHGAP31	28	150	2.5	MIA PaCa2	Control	1	4_4	Rep1_4_4	305.849	1.10874	1.08638
ARHGAP31	29	160	2.66667	MIA PaCa2	Control	1	4_4	Rep1_4_4	302.269	1.09385	1.08705
ARHGAP31	30	170	2.83333	MIA PaCa2	Control	1	4_4	Rep1_4_4	303.702	1.10242	1.08683
ARHGAP31	31	180	3	MIA PaCa2	Control	1	4_4	Rep1_4_4	295.291	1.06688	1.08919
ARHGAP31	32	190	3.16667	MIA PaCa2	Control	1	4_4	Rep1_4_4	301.392	1.08696	1.08886
ARHGAP31	33	200	3.33333	MIA PaCa2	Control	1	4_4	Rep1_4_4	297.956	1.07602	1.08994
ARHGAP31	34	210	3.5	MIA PaCa2	Control	1	4_4	Rep1_4_4	302.905	1.08944	1.08651
ARHGAP31	35	220	3.66667	MIA PaCa2	Control	1	4_4	Rep1_4_4	305.564	1.10641	1.0836
ARHGAP31	36	230	3.83333	MIA PaCa2	Control	1	4_4	Rep1_4_4	302.972	1.10145	1.07836
ARHGAP31	37	240	4	MIA PaCa2	Control	1	4_4	Rep1_4_4	295.35	1.07836	1.07253
ARHGAP31	38	250	4.16667	MIA PaCa2	Control	1	4_4	Rep1_4_4	292.061	1.04655	1.0727
ARHGAP31	39	260	4.33333	MIA PaCa2	Control	1	4_4	Rep1_4_4	291.644	1.05024	1.06817
ARHGAP31	40	270	4.5	MIA PaCa2	Control	1	4_4	Rep1_4_4	286.751	1.03523	1.06312
ARHGAP31	41	280	4.66667	MIA PaCa2	Control	1	4_4	Rep1_4_4	302.518	1.09066	1.059
ARHGAP31	42	290	4.83333	MIA PaCa2	Control	1	4_4	Rep1_4_4	296.323	1.07471	1.06783
ARHGAP31	43	300	5	MIA PaCa2	Control	1	4_4	Rep1_4_4	293.094	1.06611	1.07352
ARHGAP31	44	310	5.16667	MIA PaCa2	Control	1	4_4	Rep1_4_4	292.325	1.0495	1.08074
ARHGAP31	45	320	5.33333	MIA PaCa2	Control	1	4_4	Rep1_4_4	304.843	1.10834	1.07462
ARHGAP31	46	330	5.5	MIA PaCa2	Control	1	4_4	Rep1_4_4	304.294	1.0901	1.07757
ARHGAP31	47	340	5.66667	MIA PaCa2	Control	1	4_4	Rep1_4_4	300.972	1.08574	1.07947
ARHGAP31	48	350	5.83333	MIA PaCa2	Control	1	4_4	Rep1_4_4	293.075	1.04784	1.08352
ARHGAP31	49	360	6	MIA PaCa2	Control	1	4_4	Rep1_4_4	303.628	1.09534	1.07986
ARHGAP31	50	370	6.16667	MIA PaCa2	Control	1	4_4	Rep1_4_4	301.923	1.07941	1.07936
ARHGAP31	51	380	6.33333	MIA PaCa2	Control	1	4_4	Rep1_4_4	302.381	1.07786	1.07741
ARHGAP31	52	390	6.5	MIA PaCa2	Control	1	4_4	Rep1_4_4	306.682	1.08271	1.08292
ARHGAP31	53	400	6.66667	MIA PaCa2	Control	1	4_4	Rep1_4_4	308.319	1.08661	1.07983
ARHGAP31	54	410	6.83333	MIA PaCa2	Control	1	4_4	Rep1_4_4	305.79	1.0721	1.08048
ARHGAP31	55	420	7	MIA PaCa2	Control	1	4_4	Rep1_4_4	305.973	1.08643	1.08315
ARHGAP31	56	430	7.16667	MIA PaCa2	Control	1	4_4	Rep1_4_4	304.738	1.07368	1.0849
ARHGAP31	57	440	7.33333	MIA PaCa2	Control	1	4_4	Rep1_4_4	307.79	1.08397	1.08835
ARHGAP31	58	450	7.5	MIA PaCa2	Control	1	4_4	Rep1_4_4	310.76	1.09655	1.09139
ARHGAP31	59	460	7.66667	MIA PaCa2	Control	1	4_4	Rep1_4_4	309.732	1.09493	1.09231
ARHGAP31	60	470	7.83333	MIA PaCa2	Control	1	4_4	Rep1_4_4	316.198	1.11077	1.09291
ARHGAP31	61	480	8	MIA PaCa2	Control	1	4_4	Rep1_4_4	311.584	1.09342	1.0942
ARHGAP31	62	490	8.16667	MIA PaCa2	Control	1	4_4	Rep1_4_4	309.483	1.09282	1.09174
ARHGAP31	63	500	8.33333	MIA PaCa2	Control	1	4_4	Rep1_4_4	307.185	1.07793	1.09048
ARHGAP31	64	510	8.5	MIA PaCa2	Control	1	4_4	Rep1_4_4	312.335	1.09299	1.08665
ARHGAP31	65	520	8.66667	MIA PaCa2	Control	1	4_4	Rep1_4_4	308.3	1.07934	1.08397
ARHGAP31	66	530	8.83333	MIA PaCa2	Control	1	4_4	Rep1_4_4	310.354	1.08607	1.08521
ARHGAP31	67	540	9	MIA PaCa2	Control	1	4_4	Rep1_4_4	311.038	1.08396	1.08542
ARHGAP31	68	550	9.16667	MIA PaCa2	Control	1	4_4	Rep1_4_4	307.251	1.0747	1.08583
ARHGAP31	69	560	9.33333	MIA PaCa2	Control	1	4_4	Rep1_4_4	314.038	1.10146	1.08629
ARHGAP31	70	570	9.5	MIA PaCa2	Control	1	4_4	Rep1_4_4	308.704	1.07946	1.08511
ARHGAP31	71	580	9.66667	MIA PaCa2	Control	1	4_4	Rep1_4_4	311.838	1.09581	1.08198
ARHGAP31	72	590	9.83333	MIA PaCa2	Control	1	4_4	Rep1_4_4	313.94	1.0826	1.08425
ARHGAP31	73	600	10	MIA PaCa2	Control	1	4_4	Rep1_4_4	311.694	1.0778	1.07933
ARHGAP31	74	610	10.1667	MIA PaCa2	Control	1	4_4	Rep1_4_4	310.768	1.06205	1.07757
ARHGAP31	75	620	10.3333	MIA PaCa2	Control	1	4_4	Rep1_4_4	316.239	1.0906	1.07477
ARHGAP31	76	630	10.5	MIA PaCa2	Control	1	4_4	Rep1_4_4	310.152	1.067	1.07672
ARHGAP31	77	640	10.6667	MIA PaCa2	Control	1	4_4	Rep1_4_4	308.229	1.06713	1.07398
ARHGAP31	78	650	10.8333	MIA PaCa2	Control	1	4_4	Rep1_4_4	311.809	1.07618	1.07369
ARHGAP31	79	660	11	MIA PaCa2	Control	1	4_4	Rep1_4_4	317.176	1.09626	1.0721
ARHGAP31	80	670	11.1667	MIA PaCa2	Control	1	4_4	Rep1_4_4	305.349	1.05863	1.07157
ARHGAP31	81	680	11.3333	MIA PaCa2	Control	1	4_4	Rep1_4_4	307.129	1.06001	1.07655
ARHGAP31	82	690	11.5	MIA PaCa2	Control	1	4_4	Rep1_4_4	312.773	1.07951	1.07724
ARHGAP31	83	700	11.6667	MIA PaCa2	Control	1	4_4	Rep1_4_4	306.981	1.06331	1.07252
ARHGAP31	84	710	11.8333	MIA PaCa2	Control	1	4_4	Rep1_4_4	315.91	1.10197	1.07531
ARHGAP31	85	720	12	MIA PaCa2	Control	1	4_4	Rep1_4_4	311.503	1.08103	1.0781
ARHGAP31	86	730	12.1667	MIA PaCa2	Control	1	4_4	Rep1_4_4	309.199	1.06317	1.08089
ARHGAP31	1	-120	-2	MIA PaCa2	Control	1	4_5	Rep1_4_5	302.521	0.978381	0.999926
ARHGAP31	2	-110	-1.83333	MIA PaCa2	Control	1	4_5	Rep1_4_5	302.656	1.00681	1.00269
ARHGAP31	3	-100	-1.66667	MIA PaCa2	Control	1	4_5	Rep1_4_5	307.231	1.02436	1.00546
ARHGAP31	4	-90	-1.5	MIA PaCa2	Control	1	4_5	Rep1_4_5	298.407	1.01688	1.00822
ARHGAP31	5	-80	-1.33333	MIA PaCa2	Control	1	4_5	Rep1_4_5	297.335	1.00944	1.01163
ARHGAP31	6	-70	-1.16667	MIA PaCa2	Control	1	4_5	Rep1_4_5	296.902	1.02393	1.0126
ARHGAP31	7	-60	-1	MIA PaCa2	Control	1	4_5	Rep1_4_5	290.939	0.997742	1.00904
ARHGAP31	8	-50	-0.833333	MIA PaCa2	Control	1	4_5	Rep1_4_5	289.058	1.00228	1.00904
ARHGAP31	9	-40	-0.666667	MIA PaCa2	Control	1	4_5	Rep1_4_5	291.027	1.01358	1.0104
ARHGAP31	10	-30	-0.5	MIA PaCa2	Control	1	4_5	Rep1_4_5	284.637	0.999459	1.00937
ARHGAP31	11	-20	-0.333333	MIA PaCa2	Control	1	4_5	Rep1_4_5	290.952	1.01682	1.01184
ARHGAP31	12	-10	-0.166667	MIA PaCa2	Control	1	4_5	Rep1_4_5	289.092	1.019	1.01488
ARHGAP31	13	0	0	MIA PaCa2	Control	1	4_5	Rep1_4_5	288.022	1.0167	1.01614
ARHGAP31	14	10	0.166667	MIA PaCa2	Control	1	4_5	Rep1_4_5	282.18	1.01502	1.01602
ARHGAP31	15	20	0.333333	MIA PaCa2	Control	1	4_5	Rep1_4_5	288.42	1.02359	1.01678
ARHGAP31	16	30	0.5	MIA PaCa2	Control	1	4_5	Rep1_4_5	285.903	1.02241	1.01697
ARHGAP31	17	40	0.666667	MIA PaCa2	Control	1	4_5	Rep1_4_5	279.645	0.998611	1.01832
ARHGAP31	18	50	0.833333	MIA PaCa2	Control	1	4_5	Rep1_4_5	284.017	1.0221	1.02001
ARHGAP31	19	60	1	MIA PaCa2	Control	1	4_5	Rep1_4_5	283.57	1.02035	1.01945
ARHGAP31	20	70	1.16667	MIA PaCa2	Control	1	4_5	Rep1_4_5	283.659	1.02615	1.02012
ARHGAP31	21	80	1.33333	MIA PaCa2	Control	1	4_5	Rep1_4_5	283.983	1.02688	1.02091
ARHGAP31	22	90	1.5	MIA PaCa2	Control	1	4_5	Rep1_4_5	284.655	1.01963	1.02098
ARHGAP31	23	100	1.66667	MIA PaCa2	Control	1	4_5	Rep1_4_5	283.25	1.02713	1.02084
ARHGAP31	24	110	1.83333	MIA PaCa2	Control	1	4_5	Rep1_4_5	278.566	1.00412	1.01738
ARHGAP31	25	120	2	MIA PaCa2	Control	1	4_5	Rep1_4_5	284.122	1.02262	1.01674
ARHGAP31	26	130	2.16667	MIA PaCa2	Control	1	4_5	Rep1_4_5	282.718	1.01935	1.01724
ARHGAP31	27	140	2.33333	MIA PaCa2	Control	1	4_5	Rep1_4_5	277.629	1.00191	1.01704
ARHGAP31	28	150	2.5	MIA PaCa2	Control	1	4_5	Rep1_4_5	282.044	1.02245	1.01918
ARHGAP31	29	160	2.66667	MIA PaCa2	Control	1	4_5	Rep1_4_5	282.729	1.02314	1.01957
ARHGAP31	30	170	2.83333	MIA PaCa2	Control	1	4_5	Rep1_4_5	282.56	1.02568	1.02212
ARHGAP31	31	180	3	MIA PaCa2	Control	1	4_5	Rep1_4_5	282.07	1.01912	1.02599
ARHGAP31	32	190	3.16667	MIA PaCa2	Control	1	4_5	Rep1_4_5	284.306	1.02534	1.02704
ARHGAP31	33	200	3.33333	MIA PaCa2	Control	1	4_5	Rep1_4_5	287.202	1.03719	1.03017
ARHGAP31	34	210	3.5	MIA PaCa2	Control	1	4_5	Rep1_4_5	286.11	1.02904	1.03115
ARHGAP31	35	220	3.66667	MIA PaCa2	Control	1	4_5	Rep1_4_5	284.406	1.0298	1.03001
ARHGAP31	36	230	3.83333	MIA PaCa2	Control	1	4_5	Rep1_4_5	287.46	1.04506	1.03123
ARHGAP31	37	240	4	MIA PaCa2	Control	1	4_5	Rep1_4_5	282.799	1.03253	1.02816
ARHGAP31	38	250	4.16667	MIA PaCa2	Control	1	4_5	Rep1_4_5	282.165	1.01109	1.02555
ARHGAP31	39	260	4.33333	MIA PaCa2	Control	1	4_5	Rep1_4_5	287.099	1.03388	1.02694
ARHGAP31	40	270	4.5	MIA PaCa2	Control	1	4_5	Rep1_4_5	281.353	1.01574	1.02458
ARHGAP31	41	280	4.66667	MIA PaCa2	Control	1	4_5	Rep1_4_5	280.346	1.01072	1.0225
ARHGAP31	42	290	4.83333	MIA PaCa2	Control	1	4_5	Rep1_4_5	286.622	1.03953	1.02408
ARHGAP31	43	300	5	MIA PaCa2	Control	1	4_5	Rep1_4_5	282.773	1.02857	1.0231
ARHGAP31	44	310	5.16667	MIA PaCa2	Control	1	4_5	Rep1_4_5	283.533	1.01794	1.02398
ARHGAP31	45	320	5.33333	MIA PaCa2	Control	1	4_5	Rep1_4_5	281.141	1.02216	1.02722
ARHGAP31	46	330	5.5	MIA PaCa2	Control	1	4_5	Rep1_4_5	286.682	1.02701	1.02794
ARHGAP31	47	340	5.66667	MIA PaCa2	Control	1	4_5	Rep1_4_5	283.275	1.0219	1.0279
ARHGAP31	48	350	5.83333	MIA PaCa2	Control	1	4_5	Rep1_4_5	289.049	1.03345	1.02808
ARHGAP31	49	360	6	MIA PaCa2	Control	1	4_5	Rep1_4_5	289.554	1.04457	1.0286
ARHGAP31	50	370	6.16667	MIA PaCa2	Control	1	4_5	Rep1_4_5	287.617	1.02826	1.0282
ARHGAP31	51	380	6.33333	MIA PaCa2	Control	1	4_5	Rep1_4_5	285.923	1.01919	1.02625
ARHGAP31	52	390	6.5	MIA PaCa2	Control	1	4_5	Rep1_4_5	290.577	1.02585	1.02264
ARHGAP31	53	400	6.66667	MIA PaCa2	Control	1	4_5	Rep1_4_5	290.605	1.02418	1.01911
ARHGAP31	54	410	6.83333	MIA PaCa2	Control	1	4_5	Rep1_4_5	287.581	1.00826	1.01859
ARHGAP31	55	420	7	MIA PaCa2	Control	1	4_5	Rep1_4_5	283.923	1.00814	1.02083
ARHGAP31	56	430	7.16667	MIA PaCa2	Control	1	4_5	Rep1_4_5	289.471	1.01989	1.01978
ARHGAP31	57	440	7.33333	MIA PaCa2	Control	1	4_5	Rep1_4_5	290.931	1.02459	1.01847
ARHGAP31	58	450	7.5	MIA PaCa2	Control	1	4_5	Rep1_4_5	293.29	1.03491	1.0192
ARHGAP31	59	460	7.66667	MIA PaCa2	Control	1	4_5	Rep1_4_5	288.115	1.01851	1.02208
ARHGAP31	60	470	7.83333	MIA PaCa2	Control	1	4_5	Rep1_4_5	288.94	1.01502	1.02332
ARHGAP31	61	480	8	MIA PaCa2	Control	1	4_5	Rep1_4_5	288.763	1.01334	1.0194
ARHGAP31	62	490	8.16667	MIA PaCa2	Control	1	4_5	Rep1_4_5	291.205	1.02828	1.01767
ARHGAP31	63	500	8.33333	MIA PaCa2	Control	1	4_5	Rep1_4_5	293.129	1.0286	1.01706
ARHGAP31	64	510	8.5	MIA PaCa2	Control	1	4_5	Rep1_4_5	284.94	0.997124	1.01749
ARHGAP31	65	520	8.66667	MIA PaCa2	Control	1	4_5	Rep1_4_5	292.148	1.02279	1.01852
ARHGAP31	66	530	8.83333	MIA PaCa2	Control	1	4_5	Rep1_4_5	289.845	1.01429	1.01668
ARHGAP31	67	540	9	MIA PaCa2	Control	1	4_5	Rep1_4_5	292.104	1.01797	1.01494
ARHGAP31	68	550	9.16667	MIA PaCa2	Control	1	4_5	Rep1_4_5	291.768	1.02054	1.01771
ARHGAP31	69	560	9.33333	MIA PaCa2	Control	1	4_5	Rep1_4_5	289.516	1.01545	1.01512
ARHGAP31	70	570	9.5	MIA PaCa2	Control	1	4_5	Rep1_4_5	290.676	1.01642	1.01362
ARHGAP31	71	580	9.66667	MIA PaCa2	Control	1	4_5	Rep1_4_5	289.271	1.01651	1.01142
ARHGAP31	72	590	9.83333	MIA PaCa2	Control	1	4_5	Rep1_4_5	291.325	1.00462	1.00949
ARHGAP31	73	600	10	MIA PaCa2	Control	1	4_5	Rep1_4_5	290.309	1.00386	1.00832
ARHGAP31	74	610	10.1667	MIA PaCa2	Control	1	4_5	Rep1_4_5	293.357	1.00255	1.00931
ARHGAP31	75	620	10.3333	MIA PaCa2	Control	1	4_5	Rep1_4_5	292.005	1.00702	1.00795
ARHGAP31	76	630	10.5	MIA PaCa2	Control	1	4_5	Rep1_4_5	292.779	1.00724	1.01073
ARHGAP31	77	640	10.6667	MIA PaCa2	Control	1	4_5	Rep1_4_5	295.593	1.02338	1.01306
ARHGAP31	78	650	10.8333	MIA PaCa2	Control	1	4_5	Rep1_4_5	291.756	1.00697	1.01225
ARHGAP31	79	660	11	MIA PaCa2	Control	1	4_5	Rep1_4_5	296.291	1.02407	1.01393
ARHGAP31	80	670	11.1667	MIA PaCa2	Control	1	4_5	Rep1_4_5	294.254	1.02016	1.01683
ARHGAP31	81	680	11.3333	MIA PaCa2	Control	1	4_5	Rep1_4_5	288.847	0.996909	1.01553
ARHGAP31	82	690	11.5	MIA PaCa2	Control	1	4_5	Rep1_4_5	295.176	1.01878	1.01711
ARHGAP31	83	700	11.6667	MIA PaCa2	Control	1	4_5	Rep1_4_5	296.649	1.02752	1.01487
ARHGAP31	84	710	11.8333	MIA PaCa2	Control	1	4_5	Rep1_4_5	290.778	1.0143	1.01496
ARHGAP31	85	720	12	MIA PaCa2	Control	1	4_5	Rep1_4_5	293.349	1.01803	1.01504
ARHGAP31	86	730	12.1667	MIA PaCa2	Control	1	4_5	Rep1_4_5	293.264	1.00838	1.01513
ARHGAP31	1	-120	-2	MIA PaCa2	TNF	1	4_9	Rep1_4_9	312.88	1.01188	1.00752
ARHGAP31	2	-110	-1.83333	MIA PaCa2	TNF	1	4_9	Rep1_4_9	298.262	0.992194	1.00087
ARHGAP31	3	-100	-1.66667	MIA PaCa2	TNF	1	4_9	Rep1_4_9	294.739	0.982708	0.994214
ARHGAP31	4	-90	-1.5	MIA PaCa2	TNF	1	4_9	Rep1_4_9	297.31	1.01314	0.987562
ARHGAP31	5	-80	-1.33333	MIA PaCa2	TNF	1	4_9	Rep1_4_9	288.373	0.979013	0.986592
ARHGAP31	6	-70	-1.16667	MIA PaCa2	TNF	1	4_9	Rep1_4_9	279.675	0.964518	0.988
ARHGAP31	7	-60	-1	MIA PaCa2	TNF	1	4_9	Rep1_4_9	282.697	0.969477	0.995288
ARHGAP31	8	-50	-0.833333	MIA PaCa2	TNF	1	4_9	Rep1_4_9	289.871	1.0051	0.993312
ARHGAP31	9	-40	-0.666667	MIA PaCa2	TNF	1	4_9	Rep1_4_9	287.715	1.00205	0.996251
ARHGAP31	10	-30	-0.5	MIA PaCa2	TNF	1	4_9	Rep1_4_9	294.396	1.03372	1.00106
ARHGAP31	11	-20	-0.333333	MIA PaCa2	TNF	1	4_9	Rep1_4_9	285.94	0.999304	1.08449
ARHGAP31	12	-10	-0.166667	MIA PaCa2	TNF	1	4_9	Rep1_4_9	283.585	0.999591	1.16802
ARHGAP31	13	0	0	MIA PaCa2	TNF	1	4_9	Rep1_4_9	282.772	0.99817	1.25203
ARHGAP31	14	10	0.166667	MIA PaCa2	TNF	1	4_9	Rep1_4_9	431.875	1.55349	1.32998
ARHGAP31	15	20	0.333333	MIA PaCa2	TNF	1	4_9	Rep1_4_9	447.962	1.5898	1.41293
ARHGAP31	16	30	0.5	MIA PaCa2	TNF	1	4_9	Rep1_4_9	444.654	1.59012	1.49671
ARHGAP31	17	40	0.666667	MIA PaCa2	TNF	1	4_9	Rep1_4_9	442.287	1.57941	1.58168
ARHGAP31	18	50	0.833333	MIA PaCa2	TNF	1	4_9	Rep1_4_9	439.019	1.57992	1.58715
ARHGAP31	19	60	1	MIA PaCa2	TNF	1	4_9	Rep1_4_9	440.792	1.58608	1.58393
ARHGAP31	20	70	1.16667	MIA PaCa2	TNF	1	4_9	Rep1_4_9	440.336	1.59294	1.58265
ARHGAP31	21	80	1.33333	MIA PaCa2	TNF	1	4_9	Rep1_4_9	440.207	1.59179	1.58073
ARHGAP31	22	90	1.5	MIA PaCa2	TNF	1	4_9	Rep1_4_9	437.546	1.56728	1.57894
ARHGAP31	23	100	1.66667	MIA PaCa2	TNF	1	4_9	Rep1_4_9	436.033	1.58116	1.57403
ARHGAP31	24	110	1.83333	MIA PaCa2	TNF	1	4_9	Rep1_4_9	434.438	1.56597	1.56844
ARHGAP31	25	120	2	MIA PaCa2	TNF	1	4_9	Rep1_4_9	435.476	1.56737	1.56444
ARHGAP31	26	130	2.16667	MIA PaCa2	TNF	1	4_9	Rep1_4_9	430.376	1.55173	1.56384
ARHGAP31	27	140	2.33333	MIA PaCa2	TNF	1	4_9	Rep1_4_9	430.543	1.55375	1.55737
ARHGAP31	28	150	2.5	MIA PaCa2	TNF	1	4_9	Rep1_4_9	431.374	1.56379	1.54777
ARHGAP31	29	160	2.66667	MIA PaCa2	TNF	1	4_9	Rep1_4_9	431.945	1.56312	1.54142
ARHGAP31	30	170	2.83333	MIA PaCa2	TNF	1	4_9	Rep1_4_9	423.105	1.53585	1.5345
ARHGAP31	31	180	3	MIA PaCa2	TNF	1	4_9	Rep1_4_9	414.843	1.49882	1.52725
ARHGAP31	32	190	3.16667	MIA PaCa2	TNF	1	4_9	Rep1_4_9	422.271	1.52291	1.51898
ARHGAP31	33	200	3.33333	MIA PaCa2	TNF	1	4_9	Rep1_4_9	416.268	1.50329	1.51122
ARHGAP31	34	210	3.5	MIA PaCa2	TNF	1	4_9	Rep1_4_9	417.884	1.50298	1.50395
ARHGAP31	35	220	3.66667	MIA PaCa2	TNF	1	4_9	Rep1_4_9	415.883	1.50587	1.49714
ARHGAP31	36	230	3.83333	MIA PaCa2	TNF	1	4_9	Rep1_4_9	415.021	1.50881	1.48748
ARHGAP31	37	240	4	MIA PaCa2	TNF	1	4_9	Rep1_4_9	406.719	1.48498	1.47914
ARHGAP31	38	250	4.16667	MIA PaCa2	TNF	1	4_9	Rep1_4_9	404.972	1.45115	1.46973
ARHGAP31	39	260	4.33333	MIA PaCa2	TNF	1	4_9	Rep1_4_9	404.12	1.45528	1.46236
ARHGAP31	40	270	4.5	MIA PaCa2	TNF	1	4_9	Rep1_4_9	400.234	1.44493	1.45321
ARHGAP31	41	280	4.66667	MIA PaCa2	TNF	1	4_9	Rep1_4_9	398.618	1.43712	1.44532
ARHGAP31	42	290	4.83333	MIA PaCa2	TNF	1	4_9	Rep1_4_9	400.964	1.45423	1.44318
ARHGAP31	43	300	5	MIA PaCa2	TNF	1	4_9	Rep1_4_9	397.199	1.44478	1.43863
ARHGAP31	44	310	5.16667	MIA PaCa2	TNF	1	4_9	Rep1_4_9	398.244	1.42977	1.44068
ARHGAP31	45	320	5.33333	MIA PaCa2	TNF	1	4_9	Rep1_4_9	395.004	1.43614	1.43984
ARHGAP31	46	330	5.5	MIA PaCa2	TNF	1	4_9	Rep1_4_9	397.335	1.42341	1.43545
ARHGAP31	47	340	5.66667	MIA PaCa2	TNF	1	4_9	Rep1_4_9	404.528	1.45931	1.43486
ARHGAP31	48	350	5.83333	MIA PaCa2	TNF	1	4_9	Rep1_4_9	400.311	1.43125	1.43497
ARHGAP31	49	360	6	MIA PaCa2	TNF	1	4_9	Rep1_4_9	394.589	1.42348	1.43108
ARHGAP31	50	370	6.16667	MIA PaCa2	TNF	1	4_9	Rep1_4_9	402.976	1.44069	1.42802
ARHGAP31	51	380	6.33333	MIA PaCa2	TNF	1	4_9	Rep1_4_9	401.324	1.43054	1.42315
ARHGAP31	52	390	6.5	MIA PaCa2	TNF	1	4_9	Rep1_4_9	399.081	1.40891	1.42071
ARHGAP31	53	400	6.66667	MIA PaCa2	TNF	1	4_9	Rep1_4_9	397.8	1.40197	1.41788
ARHGAP31	54	410	6.83333	MIA PaCa2	TNF	1	4_9	Rep1_4_9	406.501	1.4252	1.41588
ARHGAP31	55	420	7	MIA PaCa2	TNF	1	4_9	Rep1_4_9	398.277	1.41418	1.41894
ARHGAP31	56	430	7.16667	MIA PaCa2	TNF	1	4_9	Rep1_4_9	398.403	1.40369	1.42508
ARHGAP31	57	440	7.33333	MIA PaCa2	TNF	1	4_9	Rep1_4_9	405.102	1.42668	1.42739
ARHGAP31	58	450	7.5	MIA PaCa2	TNF	1	4_9	Rep1_4_9	411.488	1.45198	1.42394
ARHGAP31	59	460	7.66667	MIA PaCa2	TNF	1	4_9	Rep1_4_9	410.705	1.45188	1.42326
ARHGAP31	60	470	7.83333	MIA PaCa2	TNF	1	4_9	Rep1_4_9	403.694	1.41814	1.42555
ARHGAP31	61	480	8	MIA PaCa2	TNF	1	4_9	Rep1_4_9	399.245	1.40105	1.42727
ARHGAP31	62	490	8.16667	MIA PaCa2	TNF	1	4_9	Rep1_4_9	399.131	1.40938	1.421
ARHGAP31	63	500	8.33333	MIA PaCa2	TNF	1	4_9	Rep1_4_9	404.6	1.41976	1.41559
ARHGAP31	64	510	8.5	MIA PaCa2	TNF	1	4_9	Rep1_4_9	411.118	1.43867	1.41145
ARHGAP31	65	520	8.66667	MIA PaCa2	TNF	1	4_9	Rep1_4_9	402.222	1.40815	1.4113
ARHGAP31	66	530	8.83333	MIA PaCa2	TNF	1	4_9	Rep1_4_9	404.062	1.41399	1.40999
ARHGAP31	67	540	9	MIA PaCa2	TNF	1	4_9	Rep1_4_9	398.618	1.38917	1.40544
ARHGAP31	68	550	9.16667	MIA PaCa2	TNF	1	4_9	Rep1_4_9	400.24	1.39996	1.3971
ARHGAP31	69	560	9.33333	MIA PaCa2	TNF	1	4_9	Rep1_4_9	399.209	1.40019	1.39514
ARHGAP31	70	570	9.5	MIA PaCa2	TNF	1	4_9	Rep1_4_9	396.915	1.38791	1.3898
ARHGAP31	71	580	9.66667	MIA PaCa2	TNF	1	4_9	Rep1_4_9	392.801	1.38032	1.39328
ARHGAP31	72	590	9.83333	MIA PaCa2	TNF	1	4_9	Rep1_4_9	404.374	1.39446	1.3839
ARHGAP31	73	600	10	MIA PaCa2	TNF	1	4_9	Rep1_4_9	398.108	1.37661	1.37224
ARHGAP31	74	610	10.1667	MIA PaCa2	TNF	1	4_9	Rep1_4_9	413.608	1.41351	1.36774
ARHGAP31	75	620	10.3333	MIA PaCa2	TNF	1	4_9	Rep1_4_9	386.896	1.33427	1.36393
ARHGAP31	76	630	10.5	MIA PaCa2	TNF	1	4_9	Rep1_4_9	383.294	1.31863	1.358
ARHGAP31	77	640	10.6667	MIA PaCa2	TNF	1	4_9	Rep1_4_9	391.77	1.35636	1.35147
ARHGAP31	78	650	10.8333	MIA PaCa2	TNF	1	4_9	Rep1_4_9	392.219	1.35371	1.338
ARHGAP31	79	660	11	MIA PaCa2	TNF	1	4_9	Rep1_4_9	391.425	1.35288	1.34074
ARHGAP31	80	670	11.1667	MIA PaCa2	TNF	1	4_9	Rep1_4_9	383.894	1.33094	1.33877
ARHGAP31	81	680	11.3333	MIA PaCa2	TNF	1	4_9	Rep1_4_9	382.231	1.31921	1.33802
ARHGAP31	82	690	11.5	MIA PaCa2	TNF	1	4_9	Rep1_4_9	392.149	1.35348	1.33393
ARHGAP31	83	700	11.6667	MIA PaCa2	TNF	1	4_9	Rep1_4_9	376.71	1.30484	1.32711
ARHGAP31	84	710	11.8333	MIA PaCa2	TNF	1	4_9	Rep1_4_9	387.331	1.3511	1.32469
ARHGAP31	85	720	12	MIA PaCa2	TNF	1	4_9	Rep1_4_9	381.822	1.32506	1.32226
ARHGAP31	86	730	12.1667	MIA PaCa2	TNF	1	4_9	Rep1_4_9	379.583	1.30518	1.31984
NFKB2	1	-120	-2	MIA PaCa2	TNF	1	11_10	Rep1_11_10	332.442	1.07515	1.09253
NFKB2	2	-110	-1.83333	MIA PaCa2	TNF	1	11_10	Rep1_11_10	335.179	1.115	1.08803
NFKB2	3	-100	-1.66667	MIA PaCa2	TNF	1	11_10	Rep1_11_10	321.355	1.07145	1.08352
NFKB2	4	-90	-1.5	MIA PaCa2	TNF	1	11_10	Rep1_11_10	321.284	1.09484	1.07901
NFKB2	5	-80	-1.33333	MIA PaCa2	TNF	1	11_10	Rep1_11_10	311.255	1.0567	1.07914
NFKB2	6	-70	-1.16667	MIA PaCa2	TNF	1	11_10	Rep1_11_10	311.965	1.07588	1.07507
NFKB2	7	-60	-1	MIA PaCa2	TNF	1	11_10	Rep1_11_10	310.283	1.06408	1.07558
NFKB2	8	-50	-0.833333	MIA PaCa2	TNF	1	11_10	Rep1_11_10	310.337	1.07606	1.07344
NFKB2	9	-40	-0.666667	MIA PaCa2	TNF	1	11_10	Rep1_11_10	311.966	1.08651	1.07635
NFKB2	10	-30	-0.5	MIA PaCa2	TNF	1	11_10	Rep1_11_10	306.15	1.075	1.07518
NFKB2	11	-20	-0.333333	MIA PaCa2	TNF	1	11_10	Rep1_11_10	308.983	1.07983	1.158
NFKB2	12	-10	-0.166667	MIA PaCa2	TNF	1	11_10	Rep1_11_10	305.577	1.07711	1.24135
NFKB2	13	0	0	MIA PaCa2	TNF	1	11_10	Rep1_11_10	302.471	1.06771	1.32343
NFKB2	14	10	0.166667	MIA PaCa2	TNF	1	11_10	Rep1_11_10	456.971	1.64376	1.40633
NFKB2	15	20	0.333333	MIA PaCa2	TNF	1	11_10	Rep1_11_10	467.615	1.65955	1.48764
NFKB2	16	30	0.5	MIA PaCa2	TNF	1	11_10	Rep1_11_10	464.488	1.66104	1.56806
NFKB2	17	40	0.666667	MIA PaCa2	TNF	1	11_10	Rep1_11_10	463.541	1.65531	1.64999
NFKB2	18	50	0.833333	MIA PaCa2	TNF	1	11_10	Rep1_11_10	458.218	1.64901	1.64923
NFKB2	19	60	1	MIA PaCa2	TNF	1	11_10	Rep1_11_10	455.788	1.64004	1.64239
NFKB2	20	70	1.16667	MIA PaCa2	TNF	1	11_10	Rep1_11_10	453.678	1.6412	1.6341
NFKB2	21	80	1.33333	MIA PaCa2	TNF	1	11_10	Rep1_11_10	453.111	1.63845	1.62701
NFKB2	22	90	1.5	MIA PaCa2	TNF	1	11_10	Rep1_11_10	449.941	1.61168	1.61898
NFKB2	23	100	1.66667	MIA PaCa2	TNF	1	11_10	Rep1_11_10	442.066	1.60303	1.61085
NFKB2	24	110	1.83333	MIA PaCa2	TNF	1	11_10	Rep1_11_10	445.453	1.60568	1.60322
NFKB2	25	120	2	MIA PaCa2	TNF	1	11_10	Rep1_11_10	442.543	1.59281	1.59573
NFKB2	26	130	2.16667	MIA PaCa2	TNF	1	11_10	Rep1_11_10	439.082	1.58312	1.59029
NFKB2	27	140	2.33333	MIA PaCa2	TNF	1	11_10	Rep1_11_10	439.976	1.58779	1.58435
NFKB2	28	150	2.5	MIA PaCa2	TNF	1	11_10	Rep1_11_10	437.51	1.58603	1.57607
NFKB2	29	160	2.66667	MIA PaCa2	TNF	1	11_10	Rep1_11_10	434.829	1.57356	1.56813
NFKB2	30	170	2.83333	MIA PaCa2	TNF	1	11_10	Rep1_11_10	430.169	1.56149	1.5596
NFKB2	31	180	3	MIA PaCa2	TNF	1	11_10	Rep1_11_10	428.378	1.54772	1.54786
NFKB2	32	190	3.16667	MIA PaCa2	TNF	1	11_10	Rep1_11_10	426.233	1.5372	1.53006
NFKB2	33	200	3.33333	MIA PaCa2	TNF	1	11_10	Rep1_11_10	421.849	1.52344	1.51897
NFKB2	34	210	3.5	MIA PaCa2	TNF	1	11_10	Rep1_11_10	418.614	1.50561	1.50653
NFKB2	35	220	3.66667	MIA PaCa2	TNF	1	11_10	Rep1_11_10	403.602	1.4614	1.4911
NFKB2	36	230	3.83333	MIA PaCa2	TNF	1	11_10	Rep1_11_10	411.482	1.49594	1.47623
NFKB2	37	240	4	MIA PaCa2	TNF	1	11_10	Rep1_11_10	403.83	1.47443	1.46294
NFKB2	38	250	4.16667	MIA PaCa2	TNF	1	11_10	Rep1_11_10	401.772	1.43968	1.45169
NFKB2	39	260	4.33333	MIA PaCa2	TNF	1	11_10	Rep1_11_10	397.967	1.43312	1.44572
NFKB2	40	270	4.5	MIA PaCa2	TNF	1	11_10	Rep1_11_10	396.212	1.43041	1.43508
NFKB2	41	280	4.66667	MIA PaCa2	TNF	1	11_10	Rep1_11_10	395.759	1.42681	1.42607
NFKB2	42	290	4.83333	MIA PaCa2	TNF	1	11_10	Rep1_11_10	391.42	1.41961	1.41977
NFKB2	43	300	5	MIA PaCa2	TNF	1	11_10	Rep1_11_10	390.795	1.42149	1.4131
NFKB2	44	310	5.16667	MIA PaCa2	TNF	1	11_10	Rep1_11_10	393.114	1.41135	1.40632
NFKB2	45	320	5.33333	MIA PaCa2	TNF	1	11_10	Rep1_11_10	383.858	1.39562	1.39763
NFKB2	46	330	5.5	MIA PaCa2	TNF	1	11_10	Rep1_11_10	387.005	1.38641	1.3941
NFKB2	47	340	5.66667	MIA PaCa2	TNF	1	11_10	Rep1_11_10	383.358	1.38295	1.38482
NFKB2	48	350	5.83333	MIA PaCa2	TNF	1	11_10	Rep1_11_10	382.057	1.36598	1.37583
NFKB2	49	360	6	MIA PaCa2	TNF	1	11_10	Rep1_11_10	386.67	1.39491	1.36693
NFKB2	50	370	6.16667	MIA PaCa2	TNF	1	11_10	Rep1_11_10	379.432	1.35651	1.36178
NFKB2	51	380	6.33333	MIA PaCa2	TNF	1	11_10	Rep1_11_10	378.28	1.3484	1.35155
NFKB2	52	390	6.5	MIA PaCa2	TNF	1	11_10	Rep1_11_10	377.671	1.33332	1.34665
NFKB2	53	400	6.66667	MIA PaCa2	TNF	1	11_10	Rep1_11_10	383.156	1.35036	1.33584
NFKB2	54	410	6.83333	MIA PaCa2	TNF	1	11_10	Rep1_11_10	374.04	1.31139	1.32928
NFKB2	55	420	7	MIA PaCa2	TNF	1	11_10	Rep1_11_10	375.027	1.33163	1.32532
NFKB2	56	430	7.16667	MIA PaCa2	TNF	1	11_10	Rep1_11_10	374.45	1.3193	1.32243
NFKB2	57	440	7.33333	MIA PaCa2	TNF	1	11_10	Rep1_11_10	372.127	1.31055	1.31596
NFKB2	58	450	7.5	MIA PaCa2	TNF	1	11_10	Rep1_11_10	374.285	1.3207	1.31453
NFKB2	59	460	7.66667	MIA PaCa2	TNF	1	11_10	Rep1_11_10	371.436	1.31306	1.30949
NFKB2	60	470	7.83333	MIA PaCa2	TNF	1	11_10	Rep1_11_10	371.52	1.30511	1.30629
NFKB2	61	480	8	MIA PaCa2	TNF	1	11_10	Rep1_11_10	370.845	1.30139	1.30354
NFKB2	62	490	8.16667	MIA PaCa2	TNF	1	11_10	Rep1_11_10	367.114	1.29633	1.30117
NFKB2	63	500	8.33333	MIA PaCa2	TNF	1	11_10	Rep1_11_10	369.586	1.2969	1.29849
NFKB2	64	510	8.5	MIA PaCa2	TNF	1	11_10	Rep1_11_10	369.003	1.29129	1.29515
NFKB2	65	520	8.66667	MIA PaCa2	TNF	1	11_10	Rep1_11_10	372.506	1.30412	1.29314
NFKB2	66	530	8.83333	MIA PaCa2	TNF	1	11_10	Rep1_11_10	369.867	1.29433	1.29155
NFKB2	67	540	9	MIA PaCa2	TNF	1	11_10	Rep1_11_10	367.775	1.28168	1.28813
NFKB2	68	550	9.16667	MIA PaCa2	TNF	1	11_10	Rep1_11_10	368.045	1.28735	1.28609
NFKB2	69	560	9.33333	MIA PaCa2	TNF	1	11_10	Rep1_11_10	366.413	1.28516	1.27961
NFKB2	70	570	9.5	MIA PaCa2	TNF	1	11_10	Rep1_11_10	364.043	1.27296	1.27203
NFKB2	71	580	9.66667	MIA PaCa2	TNF	1	11_10	Rep1_11_10	363.4	1.277	1.26584
NFKB2	72	590	9.83333	MIA PaCa2	TNF	1	11_10	Rep1_11_10	365.035	1.2588	1.26093
NFKB2	73	600	10	MIA PaCa2	TNF	1	11_10	Rep1_11_10	358.955	1.24122	1.25413
NFKB2	74	610	10.1667	MIA PaCa2	TNF	1	11_10	Rep1_11_10	362.356	1.23835	1.25204
NFKB2	75	620	10.3333	MIA PaCa2	TNF	1	11_10	Rep1_11_10	363.339	1.25303	1.24551
NFKB2	76	630	10.5	MIA PaCa2	TNF	1	11_10	Rep1_11_10	359.714	1.23751	1.24342
NFKB2	77	640	10.6667	MIA PaCa2	TNF	1	11_10	Rep1_11_10	363.474	1.25839	1.24373
NFKB2	78	650	10.8333	MIA PaCa2	TNF	1	11_10	Rep1_11_10	356.738	1.23124	1.24481
NFKB2	79	660	11	MIA PaCa2	TNF	1	11_10	Rep1_11_10	359.966	1.24415	1.24218
NFKB2	80	670	11.1667	MIA PaCa2	TNF	1	11_10	Rep1_11_10	358.644	1.24339	1.2396
NFKB2	81	680	11.3333	MIA PaCa2	TNF	1	11_10	Rep1_11_10	361.01	1.24597	1.23713
NFKB2	82	690	11.5	MIA PaCa2	TNF	1	11_10	Rep1_11_10	357.714	1.23463	1.23951
NFKB2	83	700	11.6667	MIA PaCa2	TNF	1	11_10	Rep1_11_10	352.048	1.21941	1.23728
NFKB2	84	710	11.8333	MIA PaCa2	TNF	1	11_10	Rep1_11_10	355.79	1.24108	1.23606
NFKB2	85	720	12	MIA PaCa2	TNF	1	11_10	Rep1_11_10	359.604	1.24796	1.23484
NFKB2	86	730	12.1667	MIA PaCa2	TNF	1	11_10	Rep1_11_10	357.285	1.22851	1.23361
NFKB2	1	-120	-2	MIA PaCa2	TNF	1	11_11	Rep1_11_11	321.037	1.03826	1.05192
NFKB2	2	-110	-1.83333	MIA PaCa2	TNF	1	11_11	Rep1_11_11	316.123	1.05161	1.05167
NFKB2	3	-100	-1.66667	MIA PaCa2	TNF	1	11_11	Rep1_11_11	318	1.06026	1.05141
NFKB2	4	-90	-1.5	MIA PaCa2	TNF	1	11_11	Rep1_11_11	311.057	1.05999	1.05115
NFKB2	5	-80	-1.33333	MIA PaCa2	TNF	1	11_11	Rep1_11_11	311.446	1.05734	1.05089
NFKB2	6	-70	-1.16667	MIA PaCa2	TNF	1	11_11	Rep1_11_11	306.8	1.05806	1.04513
NFKB2	7	-60	-1	MIA PaCa2	TNF	1	11_11	Rep1_11_11	301.084	1.03253	1.04087
NFKB2	8	-50	-0.833333	MIA PaCa2	TNF	1	11_11	Rep1_11_11	298.905	1.03642	1.03949
NFKB2	9	-40	-0.666667	MIA PaCa2	TNF	1	11_11	Rep1_11_11	290.362	1.01127	1.03684
NFKB2	10	-30	-0.5	MIA PaCa2	TNF	1	11_11	Rep1_11_11	293.478	1.0305	1.03643
NFKB2	11	-20	-0.333333	MIA PaCa2	TNF	1	11_11	Rep1_11_11	300.53	1.05029	1.13089
NFKB2	12	-10	-0.166667	MIA PaCa2	TNF	1	11_11	Rep1_11_11	294.714	1.03882	1.21854
NFKB2	13	0	0	MIA PaCa2	TNF	1	11_11	Rep1_11_11	298.929	1.0552	1.30994
NFKB2	14	10	0.166667	MIA PaCa2	TNF	1	11_11	Rep1_11_11	470.86	1.69372	1.39621
NFKB2	15	20	0.333333	MIA PaCa2	TNF	1	11_11	Rep1_11_11	464.921	1.64998	1.48084
NFKB2	16	30	0.5	MIA PaCa2	TNF	1	11_11	Rep1_11_11	461.695	1.65106	1.56639
NFKB2	17	40	0.666667	MIA PaCa2	TNF	1	11_11	Rep1_11_11	457.682	1.63438	1.65112
NFKB2	18	50	0.833333	MIA PaCa2	TNF	1	11_11	Rep1_11_11	456.476	1.64274	1.64478
NFKB2	19	60	1	MIA PaCa2	TNF	1	11_11	Rep1_11_11	455.125	1.63765	1.63903
NFKB2	20	70	1.16667	MIA PaCa2	TNF	1	11_11	Rep1_11_11	455.643	1.64831	1.63756
NFKB2	21	80	1.33333	MIA PaCa2	TNF	1	11_11	Rep1_11_11	456.111	1.6493	1.63447
NFKB2	22	90	1.5	MIA PaCa2	TNF	1	11_11	Rep1_11_11	449.405	1.60976	1.6289
NFKB2	23	100	1.66667	MIA PaCa2	TNF	1	11_11	Rep1_11_11	452.476	1.64078	1.62561
NFKB2	24	110	1.83333	MIA PaCa2	TNF	1	11_11	Rep1_11_11	447.42	1.61277	1.61795
NFKB2	25	120	2	MIA PaCa2	TNF	1	11_11	Rep1_11_11	445.568	1.6037	1.61077
NFKB2	26	130	2.16667	MIA PaCa2	TNF	1	11_11	Rep1_11_11	447.834	1.61468	1.60689
NFKB2	27	140	2.33333	MIA PaCa2	TNF	1	11_11	Rep1_11_11	441.877	1.59465	1.59683
NFKB2	28	150	2.5	MIA PaCa2	TNF	1	11_11	Rep1_11_11	441.109	1.59908	1.59061
NFKB2	29	160	2.66667	MIA PaCa2	TNF	1	11_11	Rep1_11_11	437.322	1.58258	1.58275
NFKB2	30	170	2.83333	MIA PaCa2	TNF	1	11_11	Rep1_11_11	432.615	1.57037	1.56814
NFKB2	31	180	3	MIA PaCa2	TNF	1	11_11	Rep1_11_11	434.322	1.5692	1.55818
NFKB2	32	190	3.16667	MIA PaCa2	TNF	1	11_11	Rep1_11_11	429.425	1.54871	1.54632
NFKB2	33	200	3.33333	MIA PaCa2	TNF	1	11_11	Rep1_11_11	418.795	1.51241	1.53808
NFKB2	34	210	3.5	MIA PaCa2	TNF	1	11_11	Rep1_11_11	423.985	1.52493	1.52791
NFKB2	35	220	3.66667	MIA PaCa2	TNF	1	11_11	Rep1_11_11	418.691	1.51604	1.51334
NFKB2	36	230	3.83333	MIA PaCa2	TNF	1	11_11	Rep1_11_11	419.442	1.52488	1.50173
NFKB2	37	240	4	MIA PaCa2	TNF	1	11_11	Rep1_11_11	410.622	1.49923	1.49254
NFKB2	38	250	4.16667	MIA PaCa2	TNF	1	11_11	Rep1_11_11	409.453	1.46721	1.47949
NFKB2	39	260	4.33333	MIA PaCa2	TNF	1	11_11	Rep1_11_11	407.493	1.46743	1.4695
NFKB2	40	270	4.5	MIA PaCa2	TNF	1	11_11	Rep1_11_11	401.096	1.44804	1.45631
NFKB2	41	280	4.66667	MIA PaCa2	TNF	1	11_11	Rep1_11_11	397.634	1.43358	1.44578
NFKB2	42	290	4.83333	MIA PaCa2	TNF	1	11_11	Rep1_11_11	398.726	1.44611	1.44063
NFKB2	43	300	5	MIA PaCa2	TNF	1	11_11	Rep1_11_11	393.849	1.4326	1.42853
NFKB2	44	310	5.16667	MIA PaCa2	TNF	1	11_11	Rep1_11_11	397.064	1.42554	1.4237
NFKB2	45	320	5.33333	MIA PaCa2	TNF	1	11_11	Rep1_11_11	393.627	1.43113	1.4173
NFKB2	46	330	5.5	MIA PaCa2	TNF	1	11_11	Rep1_11_11	385.98	1.38273	1.40921
NFKB2	47	340	5.66667	MIA PaCa2	TNF	1	11_11	Rep1_11_11	392.019	1.41419	1.4004
NFKB2	48	350	5.83333	MIA PaCa2	TNF	1	11_11	Rep1_11_11	388.45	1.38884	1.39488
NFKB2	49	360	6	MIA PaCa2	TNF	1	11_11	Rep1_11_11	385.154	1.38944	1.38818
NFKB2	50	370	6.16667	MIA PaCa2	TNF	1	11_11	Rep1_11_11	383.474	1.37096	1.38708
NFKB2	51	380	6.33333	MIA PaCa2	TNF	1	11_11	Rep1_11_11	389.06	1.38683	1.3813
NFKB2	52	390	6.5	MIA PaCa2	TNF	1	11_11	Rep1_11_11	392.108	1.38429	1.37989
NFKB2	53	400	6.66667	MIA PaCa2	TNF	1	11_11	Rep1_11_11	390.143	1.37498	1.37635
NFKB2	54	410	6.83333	MIA PaCa2	TNF	1	11_11	Rep1_11_11	391.826	1.37375	1.36784
NFKB2	55	420	7	MIA PaCa2	TNF	1	11_11	Rep1_11_11	388.36	1.37897	1.36271
NFKB2	56	430	7.16667	MIA PaCa2	TNF	1	11_11	Rep1_11_11	387.318	1.36464	1.35685
NFKB2	57	440	7.33333	MIA PaCa2	TNF	1	11_11	Rep1_11_11	372.373	1.31142	1.35224
NFKB2	58	450	7.5	MIA PaCa2	TNF	1	11_11	Rep1_11_11	382.85	1.35093	1.34494
NFKB2	59	460	7.66667	MIA PaCa2	TNF	1	11_11	Rep1_11_11	379.991	1.3433	1.34137
NFKB2	60	470	7.83333	MIA PaCa2	TNF	1	11_11	Rep1_11_11	382.217	1.34269	1.33863
NFKB2	61	480	8	MIA PaCa2	TNF	1	11_11	Rep1_11_11	376.901	1.32264	1.34095
NFKB2	62	490	8.16667	MIA PaCa2	TNF	1	11_11	Rep1_11_11	383.443	1.35398	1.33725
NFKB2	63	500	8.33333	MIA PaCa2	TNF	1	11_11	Rep1_11_11	383.431	1.34548	1.33125
NFKB2	64	510	8.5	MIA PaCa2	TNF	1	11_11	Rep1_11_11	379.388	1.32764	1.32294
NFKB2	65	520	8.66667	MIA PaCa2	TNF	1	11_11	Rep1_11_11	378.478	1.32502	1.31915
NFKB2	66	530	8.83333	MIA PaCa2	TNF	1	11_11	Rep1_11_11	371.854	1.30128	1.31022
NFKB2	67	540	9	MIA PaCa2	TNF	1	11_11	Rep1_11_11	368.587	1.28451	1.30664
NFKB2	68	550	9.16667	MIA PaCa2	TNF	1	11_11	Rep1_11_11	370.562	1.29615	1.29914
NFKB2	69	560	9.33333	MIA PaCa2	TNF	1	11_11	Rep1_11_11	368.216	1.29148	1.29081
NFKB2	70	570	9.5	MIA PaCa2	TNF	1	11_11	Rep1_11_11	377.616	1.32042	1.28923
NFKB2	71	580	9.66667	MIA PaCa2	TNF	1	11_11	Rep1_11_11	362.865	1.27512	1.28126
NFKB2	72	590	9.83333	MIA PaCa2	TNF	1	11_11	Rep1_11_11	367.326	1.2667	1.27539
NFKB2	73	600	10	MIA PaCa2	TNF	1	11_11	Rep1_11_11	373.132	1.29025	1.26758
NFKB2	74	610	10.1667	MIA PaCa2	TNF	1	11_11	Rep1_11_11	359.528	1.22869	1.25734
NFKB2	75	620	10.3333	MIA PaCa2	TNF	1	11_11	Rep1_11_11	363.939	1.2551	1.25108
NFKB2	76	630	10.5	MIA PaCa2	TNF	1	11_11	Rep1_11_11	359.498	1.23677	1.2471
NFKB2	77	640	10.6667	MIA PaCa2	TNF	1	11_11	Rep1_11_11	360.697	1.24878	1.23777
NFKB2	78	650	10.8333	MIA PaCa2	TNF	1	11_11	Rep1_11_11	356.74	1.23125	1.23732
NFKB2	79	660	11	MIA PaCa2	TNF	1	11_11	Rep1_11_11	358.434	1.23886	1.23735
NFKB2	80	670	11.1667	MIA PaCa2	TNF	1	11_11	Rep1_11_11	353.327	1.22496	1.23956
NFKB2	81	680	11.3333	MIA PaCa2	TNF	1	11_11	Rep1_11_11	355.081	1.22551	1.2385
NFKB2	82	690	11.5	MIA PaCa2	TNF	1	11_11	Rep1_11_11	363.717	1.25535	1.23726
NFKB2	83	700	11.6667	MIA PaCa2	TNF	1	11_11	Rep1_11_11	361.522	1.25223	1.23486
NFKB2	84	710	11.8333	MIA PaCa2	TNF	1	11_11	Rep1_11_11	355.876	1.24138	1.23385
NFKB2	85	720	12	MIA PaCa2	TNF	1	11_11	Rep1_11_11	352.272	1.22251	1.23283
NFKB2	86	730	12.1667	MIA PaCa2	TNF	1	11_11	Rep1_11_11	355.426	1.22212	1.23181
NFKB2	1	-120	-2	MIA PaCa2	Control	1	11_3	Rep1_11_3	337.449	1.09134	1.08523
NFKB2	2	-110	-1.83333	MIA PaCa2	Control	1	11_3	Rep1_11_3	322.592	1.07313	1.08112
NFKB2	3	-100	-1.66667	MIA PaCa2	Control	1	11_3	Rep1_11_3	319.114	1.06398	1.07702
NFKB2	4	-90	-1.5	MIA PaCa2	Control	1	11_3	Rep1_11_3	318.397	1.085	1.07292
NFKB2	5	-80	-1.33333	MIA PaCa2	Control	1	11_3	Rep1_11_3	318.361	1.08082	1.06649
NFKB2	6	-70	-1.16667	MIA PaCa2	Control	1	11_3	Rep1_11_3	307.344	1.05994	1.06412
NFKB2	7	-60	-1	MIA PaCa2	Control	1	11_3	Rep1_11_3	307.993	1.05623	1.06188
NFKB2	8	-50	-0.833333	MIA PaCa2	Control	1	11_3	Rep1_11_3	301.764	1.04633	1.05739
NFKB2	9	-40	-0.666667	MIA PaCa2	Control	1	11_3	Rep1_11_3	303.356	1.05652	1.05277
NFKB2	10	-30	-0.5	MIA PaCa2	Control	1	11_3	Rep1_11_3	298.552	1.04832	1.05355
NFKB2	11	-20	-0.333333	MIA PaCa2	Control	1	11_3	Rep1_11_3	301.459	1.05354	1.05774
NFKB2	12	-10	-0.166667	MIA PaCa2	Control	1	11_3	Rep1_11_3	297.455	1.04848	1.05715
NFKB2	13	0	0	MIA PaCa2	Control	1	11_3	Rep1_11_3	301.824	1.06542	1.0558
NFKB2	14	10	0.166667	MIA PaCa2	Control	1	11_3	Rep1_11_3	301.793	1.08557	1.05716
NFKB2	15	20	0.333333	MIA PaCa2	Control	1	11_3	Rep1_11_3	293.658	1.04218	1.05893
NFKB2	16	30	0.5	MIA PaCa2	Control	1	11_3	Rep1_11_3	292.812	1.04712	1.0613
NFKB2	17	40	0.666667	MIA PaCa2	Control	1	11_3	Rep1_11_3	296.222	1.05781	1.05728
NFKB2	18	50	0.833333	MIA PaCa2	Control	1	11_3	Rep1_11_3	296.187	1.0659	1.05143
NFKB2	19	60	1	MIA PaCa2	Control	1	11_3	Rep1_11_3	296.008	1.06511	1.04987
NFKB2	20	70	1.16667	MIA PaCa2	Control	1	11_3	Rep1_11_3	286.734	1.03727	1.048
NFKB2	21	80	1.33333	MIA PaCa2	Control	1	11_3	Rep1_11_3	288.888	1.04462	1.04466
NFKB2	22	90	1.5	MIA PaCa2	Control	1	11_3	Rep1_11_3	287.902	1.03126	1.04263
NFKB2	23	100	1.66667	MIA PaCa2	Control	1	11_3	Rep1_11_3	285.154	1.03403	1.04089
NFKB2	24	110	1.83333	MIA PaCa2	Control	1	11_3	Rep1_11_3	286.983	1.03446	1.04211
NFKB2	25	120	2	MIA PaCa2	Control	1	11_3	Rep1_11_3	292.194	1.05167	1.04073
NFKB2	26	130	2.16667	MIA PaCa2	Control	1	11_3	Rep1_11_3	292.034	1.05294	1.04095
NFKB2	27	140	2.33333	MIA PaCa2	Control	1	11_3	Rep1_11_3	289.788	1.04579	1.04088
NFKB2	28	150	2.5	MIA PaCa2	Control	1	11_3	Rep1_11_3	285.503	1.03498	1.0418
NFKB2	29	160	2.66667	MIA PaCa2	Control	1	11_3	Rep1_11_3	285.387	1.03276	1.04137
NFKB2	30	170	2.83333	MIA PaCa2	Control	1	11_3	Rep1_11_3	284.732	1.03356	1.03851
NFKB2	31	180	3	MIA PaCa2	Control	1	11_3	Rep1_11_3	288.108	1.04093	1.03873
NFKB2	32	190	3.16667	MIA PaCa2	Control	1	11_3	Rep1_11_3	290.76	1.04862	1.04032
NFKB2	33	200	3.33333	MIA PaCa2	Control	1	11_3	Rep1_11_3	286.025	1.03294	1.04508
NFKB2	34	210	3.5	MIA PaCa2	Control	1	11_3	Rep1_11_3	291.185	1.04729	1.0488
NFKB2	35	220	3.66667	MIA PaCa2	Control	1	11_3	Rep1_11_3	288.919	1.04614	1.04903
NFKB2	36	230	3.83333	MIA PaCa2	Control	1	11_3	Rep1_11_3	293.235	1.06606	1.04882
NFKB2	37	240	4	MIA PaCa2	Control	1	11_3	Rep1_11_3	290.215	1.05961	1.05122
NFKB2	38	250	4.16667	MIA PaCa2	Control	1	11_3	Rep1_11_3	290.953	1.04258	1.05137
NFKB2	39	260	4.33333	MIA PaCa2	Control	1	11_3	Rep1_11_3	290.771	1.0471	1.0532
NFKB2	40	270	4.5	MIA PaCa2	Control	1	11_3	Rep1_11_3	290.772	1.04975	1.05068
NFKB2	41	280	4.66667	MIA PaCa2	Control	1	11_3	Rep1_11_3	290.777	1.04833	1.04915
NFKB2	42	290	4.83333	MIA PaCa2	Control	1	11_3	Rep1_11_3	291.994	1.05901	1.05188
NFKB2	43	300	5	MIA PaCa2	Control	1	11_3	Rep1_11_3	288.213	1.04836	1.05012
NFKB2	44	310	5.16667	MIA PaCa2	Control	1	11_3	Rep1_11_3	292.167	1.04894	1.04885
NFKB2	45	320	5.33333	MIA PaCa2	Control	1	11_3	Rep1_11_3	292.009	1.06168	1.04747
NFKB2	46	330	5.5	MIA PaCa2	Control	1	11_3	Rep1_11_3	288.856	1.0348	1.04785
NFKB2	47	340	5.66667	MIA PaCa2	Control	1	11_3	Rep1_11_3	288.518	1.04082	1.04781
NFKB2	48	350	5.83333	MIA PaCa2	Control	1	11_3	Rep1_11_3	290.519	1.0387	1.04743
NFKB2	49	360	6	MIA PaCa2	Control	1	11_3	Rep1_11_3	294.297	1.06168	1.04677
NFKB2	50	370	6.16667	MIA PaCa2	Control	1	11_3	Rep1_11_3	293.158	1.04807	1.04906
NFKB2	51	380	6.33333	MIA PaCa2	Control	1	11_3	Rep1_11_3	293.529	1.0463	1.04969
NFKB2	52	390	6.5	MIA PaCa2	Control	1	11_3	Rep1_11_3	299.401	1.057	1.05415
NFKB2	53	400	6.66667	MIA PaCa2	Control	1	11_3	Rep1_11_3	298.166	1.05082	1.05104
NFKB2	54	410	6.83333	MIA PaCa2	Control	1	11_3	Rep1_11_3	298.137	1.04527	1.05166
NFKB2	55	420	7	MIA PaCa2	Control	1	11_3	Rep1_11_3	301.325	1.06993	1.05263
NFKB2	56	430	7.16667	MIA PaCa2	Control	1	11_3	Rep1_11_3	295.151	1.03991	1.0513
NFKB2	57	440	7.33333	MIA PaCa2	Control	1	11_3	Rep1_11_3	298.823	1.05239	1.05265
NFKB2	58	450	7.5	MIA PaCa2	Control	1	11_3	Rep1_11_3	298.444	1.05309	1.05282
NFKB2	59	460	7.66667	MIA PaCa2	Control	1	11_3	Rep1_11_3	296.366	1.04768	1.04974
NFKB2	60	470	7.83333	MIA PaCa2	Control	1	11_3	Rep1_11_3	301.824	1.06028	1.05138
NFKB2	61	480	8	MIA PaCa2	Control	1	11_3	Rep1_11_3	298.205	1.04647	1.05211
NFKB2	62	490	8.16667	MIA PaCa2	Control	1	11_3	Rep1_11_3	296.9	1.04839	1.05267
NFKB2	63	500	8.33333	MIA PaCa2	Control	1	11_3	Rep1_11_3	299.616	1.05137	1.0561
NFKB2	64	510	8.5	MIA PaCa2	Control	1	11_3	Rep1_11_3	302.19	1.05749	1.05634
NFKB2	65	520	8.66667	MIA PaCa2	Control	1	11_3	Rep1_11_3	301.915	1.05698	1.05962
NFKB2	66	530	8.83333	MIA PaCa2	Control	1	11_3	Rep1_11_3	306.254	1.07172	1.05993
NFKB2	67	540	9	MIA PaCa2	Control	1	11_3	Rep1_11_3	304.724	1.06195	1.06364
NFKB2	68	550	9.16667	MIA PaCa2	Control	1	11_3	Rep1_11_3	305.739	1.06941	1.06546
NFKB2	69	560	9.33333	MIA PaCa2	Control	1	11_3	Rep1_11_3	299.53	1.05058	1.06435
NFKB2	70	570	9.5	MIA PaCa2	Control	1	11_3	Rep1_11_3	308.11	1.07738	1.0625
NFKB2	71	580	9.66667	MIA PaCa2	Control	1	11_3	Rep1_11_3	304.547	1.07019	1.05872
NFKB2	72	590	9.83333	MIA PaCa2	Control	1	11_3	Rep1_11_3	304.269	1.04925	1.05816
NFKB2	73	600	10	MIA PaCa2	Control	1	11_3	Rep1_11_3	306.175	1.05872	1.05719
NFKB2	74	610	10.1667	MIA PaCa2	Control	1	11_3	Rep1_11_3	303.008	1.03553	1.0569
NFKB2	75	620	10.3333	MIA PaCa2	Control	1	11_3	Rep1_11_3	308.959	1.06549	1.05835
NFKB2	76	630	10.5	MIA PaCa2	Control	1	11_3	Rep1_11_3	303.393	1.04375	1.06148
NFKB2	77	640	10.6667	MIA PaCa2	Control	1	11_3	Rep1_11_3	310.601	1.07534	1.06353
NFKB2	78	650	10.8333	MIA PaCa2	Control	1	11_3	Rep1_11_3	313.02	1.08036	1.06683
NFKB2	79	660	11	MIA PaCa2	Control	1	11_3	Rep1_11_3	309.926	1.0712	1.06616
NFKB2	80	670	11.1667	MIA PaCa2	Control	1	11_3	Rep1_11_3	309.503	1.07303	1.07092
NFKB2	81	680	11.3333	MIA PaCa2	Control	1	11_3	Rep1_11_3	306.734	1.05864	1.07221
NFKB2	82	690	11.5	MIA PaCa2	Control	1	11_3	Rep1_11_3	307.347	1.06079	1.0706
NFKB2	83	700	11.6667	MIA PaCa2	Control	1	11_3	Rep1_11_3	310.958	1.07708	1.07067
NFKB2	84	710	11.8333	MIA PaCa2	Control	1	11_3	Rep1_11_3	310.867	1.08438	1.07211
NFKB2	85	720	12	MIA PaCa2	Control	1	11_3	Rep1_11_3	308.058	1.06907	1.07356
NFKB2	86	730	12.1667	MIA PaCa2	Control	1	11_3	Rep1_11_3	311.677	1.07169	1.075
NFKB2	1	-120	-2	MIA PaCa2	Control	1	11_4	Rep1_11_4	324.672	1.05002	1.06295
NFKB2	2	-110	-1.83333	MIA PaCa2	Control	1	11_4	Rep1_11_4	314.085	1.04483	1.0565
NFKB2	3	-100	-1.66667	MIA PaCa2	Control	1	11_4	Rep1_11_4	320.178	1.06752	1.05005
NFKB2	4	-90	-1.5	MIA PaCa2	Control	1	11_4	Rep1_11_4	312.954	1.06645	1.0436
NFKB2	5	-80	-1.33333	MIA PaCa2	Control	1	11_4	Rep1_11_4	307.27	1.04317	1.03829
NFKB2	6	-70	-1.16667	MIA PaCa2	Control	1	11_4	Rep1_11_4	294.661	1.0162	1.03469
NFKB2	7	-60	-1	MIA PaCa2	Control	1	11_4	Rep1_11_4	296.556	1.017	1.02747
NFKB2	8	-50	-0.833333	MIA PaCa2	Control	1	11_4	Rep1_11_4	292.11	1.01286	1.02213
NFKB2	9	-40	-0.666667	MIA PaCa2	Control	1	11_4	Rep1_11_4	292.753	1.01959	1.02189
NFKB2	10	-30	-0.5	MIA PaCa2	Control	1	11_4	Rep1_11_4	289.64	1.01703	1.02383
NFKB2	11	-20	-0.333333	MIA PaCa2	Control	1	11_4	Rep1_11_4	294.453	1.02906	1.0284
NFKB2	12	-10	-0.166667	MIA PaCa2	Control	1	11_4	Rep1_11_4	295.477	1.04151	1.02941
NFKB2	13	0	0	MIA PaCa2	Control	1	11_4	Rep1_11_4	291.723	1.02976	1.0281
NFKB2	14	10	0.166667	MIA PaCa2	Control	1	11_4	Rep1_11_4	291.624	1.04899	1.02988
NFKB2	15	20	0.333333	MIA PaCa2	Control	1	11_4	Rep1_11_4	287.385	1.01992	1.03047
NFKB2	16	30	0.5	MIA PaCa2	Control	1	11_4	Rep1_11_4	282.556	1.01044	1.03054
NFKB2	17	40	0.666667	MIA PaCa2	Control	1	11_4	Rep1_11_4	288.288	1.02948	1.03136
NFKB2	18	50	0.833333	MIA PaCa2	Control	1	11_4	Rep1_11_4	287.093	1.03318	1.02858
NFKB2	19	60	1	MIA PaCa2	Control	1	11_4	Rep1_11_4	289.597	1.04204	1.02763
NFKB2	20	70	1.16667	MIA PaCa2	Control	1	11_4	Rep1_11_4	286.23	1.03545	1.03098
NFKB2	21	80	1.33333	MIA PaCa2	Control	1	11_4	Rep1_11_4	284.713	1.02952	1.03041
NFKB2	22	90	1.5	MIA PaCa2	Control	1	11_4	Rep1_11_4	282.885	1.01329	1.02876
NFKB2	23	100	1.66667	MIA PaCa2	Control	1	11_4	Rep1_11_4	285.119	1.03391	1.02629
NFKB2	24	110	1.83333	MIA PaCa2	Control	1	11_4	Rep1_11_4	284.49	1.02547	1.02526
NFKB2	25	120	2	MIA PaCa2	Control	1	11_4	Rep1_11_4	283.85	1.02164	1.02469
NFKB2	26	130	2.16667	MIA PaCa2	Control	1	11_4	Rep1_11_4	284.225	1.02478	1.0274
NFKB2	27	140	2.33333	MIA PaCa2	Control	1	11_4	Rep1_11_4	284.923	1.02823	1.02704
NFKB2	28	150	2.5	MIA PaCa2	Control	1	11_4	Rep1_11_4	282.891	1.02552	1.02656
NFKB2	29	160	2.66667	MIA PaCa2	Control	1	11_4	Rep1_11_4	285.239	1.03222	1.02752
NFKB2	30	170	2.83333	MIA PaCa2	Control	1	11_4	Rep1_11_4	284.136	1.03139	1.02694
NFKB2	31	180	3	MIA PaCa2	Control	1	11_4	Rep1_11_4	282.914	1.02216	1.02547
NFKB2	32	190	3.16667	MIA PaCa2	Control	1	11_4	Rep1_11_4	285.126	1.0283	1.02455
NFKB2	33	200	3.33333	MIA PaCa2	Control	1	11_4	Rep1_11_4	282.652	1.02075	1.02383
NFKB2	34	210	3.5	MIA PaCa2	Control	1	11_4	Rep1_11_4	283.03	1.01796	1.02331
NFKB2	35	220	3.66667	MIA PaCa2	Control	1	11_4	Rep1_11_4	281.432	1.01904	1.02454
NFKB2	36	230	3.83333	MIA PaCa2	Control	1	11_4	Rep1_11_4	282.541	1.02718	1.02283
NFKB2	37	240	4	MIA PaCa2	Control	1	11_4	Rep1_11_4	281.501	1.02779	1.025
NFKB2	38	250	4.16667	MIA PaCa2	Control	1	11_4	Rep1_11_4	287.646	1.03073	1.02646
NFKB2	39	260	4.33333	MIA PaCa2	Control	1	11_4	Rep1_11_4	282.239	1.01637	1.03082
NFKB2	40	270	4.5	MIA PaCa2	Control	1	11_4	Rep1_11_4	286.949	1.03595	1.03319
NFKB2	41	280	4.66667	MIA PaCa2	Control	1	11_4	Rep1_11_4	285.187	1.02817	1.03229
NFKB2	42	290	4.83333	MIA PaCa2	Control	1	11_4	Rep1_11_4	289.392	1.04957	1.03051
NFKB2	43	300	5	MIA PaCa2	Control	1	11_4	Rep1_11_4	286.938	1.04372	1.02975
NFKB2	44	310	5.16667	MIA PaCa2	Control	1	11_4	Rep1_11_4	284.524	1.0215	1.02628
NFKB2	45	320	5.33333	MIA PaCa2	Control	1	11_4	Rep1_11_4	280.067	1.01826	1.02391
NFKB2	46	330	5.5	MIA PaCa2	Control	1	11_4	Rep1_11_4	282.241	1.0111	1.02123
NFKB2	47	340	5.66667	MIA PaCa2	Control	1	11_4	Rep1_11_4	280.435	1.01166	1.01676
NFKB2	48	350	5.83333	MIA PaCa2	Control	1	11_4	Rep1_11_4	282.935	1.01159	1.01632
NFKB2	49	360	6	MIA PaCa2	Control	1	11_4	Rep1_11_4	285.728	1.03076	1.01415
NFKB2	50	370	6.16667	MIA PaCa2	Control	1	11_4	Rep1_11_4	283.2	1.01247	1.01492
NFKB2	51	380	6.33333	MIA PaCa2	Control	1	11_4	Rep1_11_4	285.703	1.01841	1.01693
NFKB2	52	390	6.5	MIA PaCa2	Control	1	11_4	Rep1_11_4	284.117	1.00304	1.01856
NFKB2	53	400	6.66667	MIA PaCa2	Control	1	11_4	Rep1_11_4	288.434	1.01653	1.01819
NFKB2	54	410	6.83333	MIA PaCa2	Control	1	11_4	Rep1_11_4	292.552	1.02569	1.01874
NFKB2	55	420	7	MIA PaCa2	Control	1	11_4	Rep1_11_4	288.118	1.02303	1.01909
NFKB2	56	430	7.16667	MIA PaCa2	Control	1	11_4	Rep1_11_4	291.807	1.02812	1.02171
NFKB2	57	440	7.33333	MIA PaCa2	Control	1	11_4	Rep1_11_4	288.593	1.01636	1.02418
NFKB2	58	450	7.5	MIA PaCa2	Control	1	11_4	Rep1_11_4	289.305	1.02084	1.02399
NFKB2	59	460	7.66667	MIA PaCa2	Control	1	11_4	Rep1_11_4	288.926	1.02138	1.02598
NFKB2	60	470	7.83333	MIA PaCa2	Control	1	11_4	Rep1_11_4	294.303	1.03386	1.02319
NFKB2	61	480	8	MIA PaCa2	Control	1	11_4	Rep1_11_4	291.904	1.02436	1.02184
NFKB2	62	490	8.16667	MIA PaCa2	Control	1	11_4	Rep1_11_4	293.663	1.03696	1.02096
NFKB2	63	500	8.33333	MIA PaCa2	Control	1	11_4	Rep1_11_4	287.428	1.0086	1.02032
NFKB2	64	510	8.5	MIA PaCa2	Control	1	11_4	Rep1_11_4	287.725	1.00687	1.01567
NFKB2	65	520	8.66667	MIA PaCa2	Control	1	11_4	Rep1_11_4	289.826	1.01466	1.01514
NFKB2	66	530	8.83333	MIA PaCa2	Control	1	11_4	Rep1_11_4	290.593	1.01691	1.01328
NFKB2	67	540	9	MIA PaCa2	Control	1	11_4	Rep1_11_4	287.333	1.00135	1.01538
NFKB2	68	550	9.16667	MIA PaCa2	Control	1	11_4	Rep1_11_4	291.785	1.0206	1.02015
NFKB2	69	560	9.33333	MIA PaCa2	Control	1	11_4	Rep1_11_4	291.944	1.02397	1.02181
NFKB2	70	570	9.5	MIA PaCa2	Control	1	11_4	Rep1_11_4	292.648	1.02331	1.02323
NFKB2	71	580	9.66667	MIA PaCa2	Control	1	11_4	Rep1_11_4	296.015	1.04021	1.02321
NFKB2	72	590	9.83333	MIA PaCa2	Control	1	11_4	Rep1_11_4	297.621	1.02633	1.0214
NFKB2	73	600	10	MIA PaCa2	Control	1	11_4	Rep1_11_4	296.952	1.02683	1.01953
NFKB2	74	610	10.1667	MIA PaCa2	Control	1	11_4	Rep1_11_4	292.972	1.00123	1.01835
NFKB2	75	620	10.3333	MIA PaCa2	Control	1	11_4	Rep1_11_4	292.265	1.00792	1.01451
NFKB2	76	630	10.5	MIA PaCa2	Control	1	11_4	Rep1_11_4	293.842	1.01089	1.01501
NFKB2	77	640	10.6667	MIA PaCa2	Control	1	11_4	Rep1_11_4	293.186	1.01505	1.01709
NFKB2	78	650	10.8333	MIA PaCa2	Control	1	11_4	Rep1_11_4	293.606	1.01335	1.02075
NFKB2	79	660	11	MIA PaCa2	Control	1	11_4	Rep1_11_4	297.946	1.02979	1.02008
NFKB2	80	670	11.1667	MIA PaCa2	Control	1	11_4	Rep1_11_4	300.383	1.04141	1.02223
NFKB2	81	680	11.3333	MIA PaCa2	Control	1	11_4	Rep1_11_4	297.522	1.02685	1.02364
NFKB2	82	690	11.5	MIA PaCa2	Control	1	11_4	Rep1_11_4	290.673	1.00324	1.02645
NFKB2	83	700	11.6667	MIA PaCa2	Control	1	11_4	Rep1_11_4	296.194	1.02595	1.02378
NFKB2	84	710	11.8333	MIA PaCa2	Control	1	11_4	Rep1_11_4	293.811	1.02488	1.02175
NFKB2	85	720	12	MIA PaCa2	Control	1	11_4	Rep1_11_4	297.683	1.03307	1.01972
NFKB2	86	730	12.1667	MIA PaCa2	Control	1	11_4	Rep1_11_4	294.05	1.01108	1.01769
NFKB2	1	-120	-2	MIA PaCa2	Control	1	11_5	Rep1_11_5	328.581	1.06266	1.06
NFKB2	2	-110	-1.83333	MIA PaCa2	Control	1	11_5	Rep1_11_5	321.725	1.07024	1.05387
NFKB2	3	-100	-1.66667	MIA PaCa2	Control	1	11_5	Rep1_11_5	304.989	1.01688	1.04774
NFKB2	4	-90	-1.5	MIA PaCa2	Control	1	11_5	Rep1_11_5	307.542	1.04801	1.0416
NFKB2	5	-80	-1.33333	MIA PaCa2	Control	1	11_5	Rep1_11_5	302.535	1.02709	1.03998
NFKB2	6	-70	-1.16667	MIA PaCa2	Control	1	11_5	Rep1_11_5	305.178	1.05247	1.0351
NFKB2	7	-60	-1	MIA PaCa2	Control	1	11_5	Rep1_11_5	295.64	1.01386	1.03876
NFKB2	8	-50	-0.833333	MIA PaCa2	Control	1	11_5	Rep1_11_5	303.191	1.05128	1.03604
NFKB2	9	-40	-0.666667	MIA PaCa2	Control	1	11_5	Rep1_11_5	297.499	1.03612	1.03798
NFKB2	10	-30	-0.5	MIA PaCa2	Control	1	11_5	Rep1_11_5	296.881	1.04245	1.03511
NFKB2	11	-20	-0.333333	MIA PaCa2	Control	1	11_5	Rep1_11_5	294.438	1.02901	1.0393
NFKB2	12	-10	-0.166667	MIA PaCa2	Control	1	11_5	Rep1_11_5	295.231	1.04064	1.03389
NFKB2	13	0	0	MIA PaCa2	Control	1	11_5	Rep1_11_5	292.468	1.03239	1.03459
NFKB2	14	10	0.166667	MIA PaCa2	Control	1	11_5	Rep1_11_5	290.008	1.04318	1.03035
NFKB2	15	20	0.333333	MIA PaCa2	Control	1	11_5	Rep1_11_5	285.562	1.01345	1.03268
NFKB2	16	30	0.5	MIA PaCa2	Control	1	11_5	Rep1_11_5	291.098	1.04099	1.03384
NFKB2	17	40	0.666667	MIA PaCa2	Control	1	11_5	Rep1_11_5	283.612	1.01278	1.03597
NFKB2	18	50	0.833333	MIA PaCa2	Control	1	11_5	Rep1_11_5	290.472	1.04533	1.03834
NFKB2	19	60	1	MIA PaCa2	Control	1	11_5	Rep1_11_5	291.469	1.04878	1.04234
NFKB2	20	70	1.16667	MIA PaCa2	Control	1	11_5	Rep1_11_5	289.503	1.04729	1.04217
NFKB2	21	80	1.33333	MIA PaCa2	Control	1	11_5	Rep1_11_5	293.067	1.05973	1.04484
NFKB2	22	90	1.5	MIA PaCa2	Control	1	11_5	Rep1_11_5	290.751	1.04146	1.04568
NFKB2	23	100	1.66667	MIA PaCa2	Control	1	11_5	Rep1_11_5	286.752	1.03983	1.04565
NFKB2	24	110	1.83333	MIA PaCa2	Control	1	11_5	Rep1_11_5	286.151	1.03146	1.0442
NFKB2	25	120	2	MIA PaCa2	Control	1	11_5	Rep1_11_5	292.063	1.0512	1.0427
NFKB2	26	130	2.16667	MIA PaCa2	Control	1	11_5	Rep1_11_5	290.817	1.04855	1.04315
NFKB2	27	140	2.33333	MIA PaCa2	Control	1	11_5	Rep1_11_5	287.405	1.03719	1.04294
NFKB2	28	150	2.5	MIA PaCa2	Control	1	11_5	Rep1_11_5	289.431	1.04922	1.04369
NFKB2	29	160	2.66667	MIA PaCa2	Control	1	11_5	Rep1_11_5	288.658	1.04459	1.04272
NFKB2	30	170	2.83333	MIA PaCa2	Control	1	11_5	Rep1_11_5	286.051	1.03835	1.0407
NFKB2	31	180	3	MIA PaCa2	Control	1	11_5	Rep1_11_5	286.944	1.03672	1.04105
NFKB2	32	190	3.16667	MIA PaCa2	Control	1	11_5	Rep1_11_5	289.591	1.0444	1.03856
NFKB2	33	200	3.33333	MIA PaCa2	Control	1	11_5	Rep1_11_5	286.437	1.03442	1.03965
NFKB2	34	210	3.5	MIA PaCa2	Control	1	11_5	Rep1_11_5	289.051	1.03962	1.04172
NFKB2	35	220	3.66667	MIA PaCa2	Control	1	11_5	Rep1_11_5	284.952	1.03178	1.04398
NFKB2	36	230	3.83333	MIA PaCa2	Control	1	11_5	Rep1_11_5	289.436	1.05224	1.04442
NFKB2	37	240	4	MIA PaCa2	Control	1	11_5	Rep1_11_5	288.368	1.05286	1.04428
NFKB2	38	250	4.16667	MIA PaCa2	Control	1	11_5	Rep1_11_5	293.725	1.05251	1.04353
NFKB2	39	260	4.33333	MIA PaCa2	Control	1	11_5	Rep1_11_5	290.872	1.04746	1.04414
NFKB2	40	270	4.5	MIA PaCa2	Control	1	11_5	Rep1_11_5	286.271	1.0335	1.04469
NFKB2	41	280	4.66667	MIA PaCa2	Control	1	11_5	Rep1_11_5	286.89	1.03432	1.04613
NFKB2	42	290	4.83333	MIA PaCa2	Control	1	11_5	Rep1_11_5	285.678	1.0361	1.04798
NFKB2	43	300	5	MIA PaCa2	Control	1	11_5	Rep1_11_5	290.338	1.05609	1.0449
NFKB2	44	310	5.16667	MIA PaCa2	Control	1	11_5	Rep1_11_5	296.065	1.06293	1.04582
NFKB2	45	320	5.33333	MIA PaCa2	Control	1	11_5	Rep1_11_5	293.06	1.0655	1.04776
NFKB2	46	330	5.5	MIA PaCa2	Control	1	11_5	Rep1_11_5	286.37	1.02589	1.05092
NFKB2	47	340	5.66667	MIA PaCa2	Control	1	11_5	Rep1_11_5	288.263	1.03989	1.04844
NFKB2	48	350	5.83333	MIA PaCa2	Control	1	11_5	Rep1_11_5	293.097	1.04792	1.04536
NFKB2	49	360	6	MIA PaCa2	Control	1	11_5	Rep1_11_5	293.345	1.05824	1.04116
NFKB2	50	370	6.16667	MIA PaCa2	Control	1	11_5	Rep1_11_5	290.541	1.03872	1.04399
NFKB2	51	380	6.33333	MIA PaCa2	Control	1	11_5	Rep1_11_5	292.136	1.04134	1.04498
NFKB2	52	390	6.5	MIA PaCa2	Control	1	11_5	Rep1_11_5	293.488	1.03613	1.04513
NFKB2	53	400	6.66667	MIA PaCa2	Control	1	11_5	Rep1_11_5	296.712	1.0457	1.04228
NFKB2	54	410	6.83333	MIA PaCa2	Control	1	11_5	Rep1_11_5	298.575	1.04681	1.04425
NFKB2	55	420	7	MIA PaCa2	Control	1	11_5	Rep1_11_5	295.426	1.04898	1.04431
NFKB2	56	430	7.16667	MIA PaCa2	Control	1	11_5	Rep1_11_5	294.694	1.03829	1.04375
NFKB2	57	440	7.33333	MIA PaCa2	Control	1	11_5	Rep1_11_5	298.854	1.0525	1.04131
NFKB2	58	450	7.5	MIA PaCa2	Control	1	11_5	Rep1_11_5	295.223	1.04173	1.04081
NFKB2	59	460	7.66667	MIA PaCa2	Control	1	11_5	Rep1_11_5	292.002	1.03225	1.04159
NFKB2	60	470	7.83333	MIA PaCa2	Control	1	11_5	Rep1_11_5	292.808	1.02861	1.04283
NFKB2	61	480	8	MIA PaCa2	Control	1	11_5	Rep1_11_5	297.296	1.04328	1.03923
NFKB2	62	490	8.16667	MIA PaCa2	Control	1	11_5	Rep1_11_5	298.625	1.05448	1.03905
NFKB2	63	500	8.33333	MIA PaCa2	Control	1	11_5	Rep1_11_5	298.36	1.04696	1.03916
NFKB2	64	510	8.5	MIA PaCa2	Control	1	11_5	Rep1_11_5	293.57	1.02732	1.0405
NFKB2	65	520	8.66667	MIA PaCa2	Control	1	11_5	Rep1_11_5	297.2	1.04048	1.03761
NFKB2	66	530	8.83333	MIA PaCa2	Control	1	11_5	Rep1_11_5	295.195	1.03302	1.03669
NFKB2	67	540	9	MIA PaCa2	Control	1	11_5	Rep1_11_5	297.836	1.03795	1.03683
NFKB2	68	550	9.16667	MIA PaCa2	Control	1	11_5	Rep1_11_5	292.491	1.02307	1.04384
NFKB2	69	560	9.33333	MIA PaCa2	Control	1	11_5	Rep1_11_5	298.805	1.04803	1.0452
NFKB2	70	570	9.5	MIA PaCa2	Control	1	11_5	Rep1_11_5	299.694	1.04795	1.04532
NFKB2	71	580	9.66667	MIA PaCa2	Control	1	11_5	Rep1_11_5	306.3	1.07635	1.04373
NFKB2	72	590	9.83333	MIA PaCa2	Control	1	11_5	Rep1_11_5	304.495	1.05003	1.04434
NFKB2	73	600	10	MIA PaCa2	Control	1	11_5	Rep1_11_5	298.993	1.03388	1.04192
NFKB2	74	610	10.1667	MIA PaCa2	Control	1	11_5	Rep1_11_5	300.456	1.02681	1.04552
NFKB2	75	620	10.3333	MIA PaCa2	Control	1	11_5	Rep1_11_5	297.89	1.02732	1.0416
NFKB2	76	630	10.5	MIA PaCa2	Control	1	11_5	Rep1_11_5	299.715	1.0311	1.04085
NFKB2	77	640	10.6667	MIA PaCa2	Control	1	11_5	Rep1_11_5	309.962	1.07313	1.04264
NFKB2	78	650	10.8333	MIA PaCa2	Control	1	11_5	Rep1_11_5	303.915	1.04893	1.04677
NFKB2	79	660	11	MIA PaCa2	Control	1	11_5	Rep1_11_5	302.274	1.04475	1.04994
NFKB2	80	670	11.1667	MIA PaCa2	Control	1	11_5	Rep1_11_5	301.839	1.04646	1.05123
NFKB2	81	680	11.3333	MIA PaCa2	Control	1	11_5	Rep1_11_5	305.884	1.05571	1.04935
NFKB2	82	690	11.5	MIA PaCa2	Control	1	11_5	Rep1_11_5	304.069	1.04948	1.04994
NFKB2	83	700	11.6667	MIA PaCa2	Control	1	11_5	Rep1_11_5	300.305	1.04019	1.04769
NFKB2	84	710	11.8333	MIA PaCa2	Control	1	11_5	Rep1_11_5	303.858	1.05993	1.04601
NFKB2	85	720	12	MIA PaCa2	Control	1	11_5	Rep1_11_5	303.448	1.05307	1.04433
NFKB2	86	730	12.1667	MIA PaCa2	Control	1	11_5	Rep1_11_5	299.27	1.02903	1.04265
NFKB2	1	-120	-2	MIA PaCa2	TNF	1	11_9	Rep1_11_9	337.835	1.09259	1.09543
NFKB2	2	-110	-1.83333	MIA PaCa2	TNF	1	11_9	Rep1_11_9	325.93	1.08423	1.07846
NFKB2	3	-100	-1.66667	MIA PaCa2	TNF	1	11_9	Rep1_11_9	314.033	1.04704	1.06148
NFKB2	4	-90	-1.5	MIA PaCa2	TNF	1	11_9	Rep1_11_9	311.753	1.06236	1.04451
NFKB2	5	-80	-1.33333	MIA PaCa2	TNF	1	11_9	Rep1_11_9	299.473	1.0167	1.02688
NFKB2	6	-70	-1.16667	MIA PaCa2	TNF	1	11_9	Rep1_11_9	297.113	1.02465	1.01277
NFKB2	7	-60	-1	MIA PaCa2	TNF	1	11_9	Rep1_11_9	286.933	0.984004	1.00536
NFKB2	8	-50	-0.833333	MIA PaCa2	TNF	1	11_9	Rep1_11_9	279.509	0.969166	0.997147
NFKB2	9	-40	-0.666667	MIA PaCa2	TNF	1	11_9	Rep1_11_9	282.954	0.985468	0.993938
NFKB2	10	-30	-0.5	MIA PaCa2	TNF	1	11_9	Rep1_11_9	283.415	0.995166	0.989635
NFKB2	11	-20	-0.333333	MIA PaCa2	TNF	1	11_9	Rep1_11_9	287.533	1.00487	1.0814
NFKB2	12	-10	-0.166667	MIA PaCa2	TNF	1	11_9	Rep1_11_9	282.066	0.994235	1.17587
NFKB2	13	0	0	MIA PaCa2	TNF	1	11_9	Rep1_11_9	281.743	0.994536	1.26694
NFKB2	14	10	0.166667	MIA PaCa2	TNF	1	11_9	Rep1_11_9	452.125	1.62633	1.35776
NFKB2	15	20	0.333333	MIA PaCa2	TNF	1	11_9	Rep1_11_9	459.423	1.63047	1.44698
NFKB2	16	30	0.5	MIA PaCa2	TNF	1	11_9	Rep1_11_9	453.85	1.623	1.53513
NFKB2	17	40	0.666667	MIA PaCa2	TNF	1	11_9	Rep1_11_9	456.694	1.63085	1.62322
NFKB2	18	50	0.833333	MIA PaCa2	TNF	1	11_9	Rep1_11_9	452.777	1.62943	1.62005
NFKB2	19	60	1	MIA PaCa2	TNF	1	11_9	Rep1_11_9	447.81	1.61133	1.61202
NFKB2	20	70	1.16667	MIA PaCa2	TNF	1	11_9	Rep1_11_9	445.36	1.61111	1.60677
NFKB2	21	80	1.33333	MIA PaCa2	TNF	1	11_9	Rep1_11_9	443.62	1.60413	1.59632
NFKB2	22	90	1.5	MIA PaCa2	TNF	1	11_9	Rep1_11_9	439.496	1.57426	1.58472
NFKB2	23	100	1.66667	MIA PaCa2	TNF	1	11_9	Rep1_11_9	437.446	1.58628	1.57538
NFKB2	24	110	1.83333	MIA PaCa2	TNF	1	11_9	Rep1_11_9	432.134	1.55767	1.56774
NFKB2	25	120	2	MIA PaCa2	TNF	1	11_9	Rep1_11_9	430.16	1.54824	1.55957
NFKB2	26	130	2.16667	MIA PaCa2	TNF	1	11_9	Rep1_11_9	428.767	1.54593	1.55299
NFKB2	27	140	2.33333	MIA PaCa2	TNF	1	11_9	Rep1_11_9	431.624	1.55765	1.54576
NFKB2	28	150	2.5	MIA PaCa2	TNF	1	11_9	Rep1_11_9	426.725	1.54694	1.53799
NFKB2	29	160	2.66667	MIA PaCa2	TNF	1	11_9	Rep1_11_9	422.298	1.52821	1.5314
NFKB2	30	170	2.83333	MIA PaCa2	TNF	1	11_9	Rep1_11_9	423.063	1.53569	1.5248
NFKB2	31	180	3	MIA PaCa2	TNF	1	11_9	Rep1_11_9	416.086	1.50331	1.515
NFKB2	32	190	3.16667	MIA PaCa2	TNF	1	11_9	Rep1_11_9	416.491	1.50207	1.50443
NFKB2	33	200	3.33333	MIA PaCa2	TNF	1	11_9	Rep1_11_9	415.289	1.49975	1.49751
NFKB2	34	210	3.5	MIA PaCa2	TNF	1	11_9	Rep1_11_9	414.013	1.48906	1.48835
NFKB2	35	220	3.66667	MIA PaCa2	TNF	1	11_9	Rep1_11_9	406.781	1.47291	1.47739
NFKB2	36	230	3.83333	MIA PaCa2	TNF	1	11_9	Rep1_11_9	407.031	1.47976	1.46756
NFKB2	37	240	4	MIA PaCa2	TNF	1	11_9	Rep1_11_9	403.044	1.47156	1.45618
NFKB2	38	250	4.16667	MIA PaCa2	TNF	1	11_9	Rep1_11_9	398.131	1.42664	1.44476
NFKB2	39	260	4.33333	MIA PaCa2	TNF	1	11_9	Rep1_11_9	397.999	1.43324	1.43779
NFKB2	40	270	4.5	MIA PaCa2	TNF	1	11_9	Rep1_11_9	393.355	1.42009	1.42643
NFKB2	41	280	4.66667	MIA PaCa2	TNF	1	11_9	Rep1_11_9	390.847	1.40911	1.41385
NFKB2	42	290	4.83333	MIA PaCa2	TNF	1	11_9	Rep1_11_9	392.663	1.42412	1.41103
NFKB2	43	300	5	MIA PaCa2	TNF	1	11_9	Rep1_11_9	384.958	1.40026	1.40293
NFKB2	44	310	5.16667	MIA PaCa2	TNF	1	11_9	Rep1_11_9	385.365	1.38353	1.40058
NFKB2	45	320	5.33333	MIA PaCa2	TNF	1	11_9	Rep1_11_9	386.948	1.40685	1.39647
NFKB2	46	330	5.5	MIA PaCa2	TNF	1	11_9	Rep1_11_9	384.258	1.37656	1.3919
NFKB2	47	340	5.66667	MIA PaCa2	TNF	1	11_9	Rep1_11_9	389.097	1.40365	1.38531
NFKB2	48	350	5.83333	MIA PaCa2	TNF	1	11_9	Rep1_11_9	386.074	1.38035	1.38109
NFKB2	49	360	6	MIA PaCa2	TNF	1	11_9	Rep1_11_9	385.898	1.39213	1.37146
NFKB2	50	370	6.16667	MIA PaCa2	TNF	1	11_9	Rep1_11_9	378.747	1.35406	1.36583
NFKB2	51	380	6.33333	MIA PaCa2	TNF	1	11_9	Rep1_11_9	379.851	1.354	1.35504
NFKB2	52	390	6.5	MIA PaCa2	TNF	1	11_9	Rep1_11_9	379.42	1.3395	1.34968
NFKB2	53	400	6.66667	MIA PaCa2	TNF	1	11_9	Rep1_11_9	379.392	1.33709	1.342
NFKB2	54	410	6.83333	MIA PaCa2	TNF	1	11_9	Rep1_11_9	378.81	1.32811	1.33715
NFKB2	55	420	7	MIA PaCa2	TNF	1	11_9	Rep1_11_9	378.186	1.34284	1.33088
NFKB2	56	430	7.16667	MIA PaCa2	TNF	1	11_9	Rep1_11_9	379.858	1.33835	1.32554
NFKB2	57	440	7.33333	MIA PaCa2	TNF	1	11_9	Rep1_11_9	374.857	1.32016	1.32058
NFKB2	58	450	7.5	MIA PaCa2	TNF	1	11_9	Rep1_11_9	371.287	1.31013	1.31771
NFKB2	59	460	7.66667	MIA PaCa2	TNF	1	11_9	Rep1_11_9	368.34	1.30211	1.31199
NFKB2	60	470	7.83333	MIA PaCa2	TNF	1	11_9	Rep1_11_9	370.727	1.30233	1.30873
NFKB2	61	480	8	MIA PaCa2	TNF	1	11_9	Rep1_11_9	372.752	1.30808	1.30424
NFKB2	62	490	8.16667	MIA PaCa2	TNF	1	11_9	Rep1_11_9	368.945	1.30279	1.29971
NFKB2	63	500	8.33333	MIA PaCa2	TNF	1	11_9	Rep1_11_9	374.89	1.31551	1.29631
NFKB2	64	510	8.5	MIA PaCa2	TNF	1	11_9	Rep1_11_9	368.273	1.28874	1.29283
NFKB2	65	520	8.66667	MIA PaCa2	TNF	1	11_9	Rep1_11_9	365.158	1.27839	1.28992
NFKB2	66	530	8.83333	MIA PaCa2	TNF	1	11_9	Rep1_11_9	365.29	1.27831	1.29037
NFKB2	67	540	9	MIA PaCa2	TNF	1	11_9	Rep1_11_9	366.709	1.27797	1.28779
NFKB2	68	550	9.16667	MIA PaCa2	TNF	1	11_9	Rep1_11_9	368.158	1.28774	1.28774
NFKB2	69	560	9.33333	MIA PaCa2	TNF	1	11_9	Rep1_11_9	372.339	1.30595	1.28242
NFKB2	70	570	9.5	MIA PaCa2	TNF	1	11_9	Rep1_11_9	371.043	1.29744	1.27978
NFKB2	71	580	9.66667	MIA PaCa2	TNF	1	11_9	Rep1_11_9	366.634	1.28837	1.27545
NFKB2	72	590	9.83333	MIA PaCa2	TNF	1	11_9	Rep1_11_9	359.922	1.24117	1.26801
NFKB2	73	600	10	MIA PaCa2	TNF	1	11_9	Rep1_11_9	364.331	1.25981	1.2607
NFKB2	74	610	10.1667	MIA PaCa2	TNF	1	11_9	Rep1_11_9	365.086	1.24768	1.26026
NFKB2	75	620	10.3333	MIA PaCa2	TNF	1	11_9	Rep1_11_9	358.301	1.23565	1.2568
NFKB2	76	630	10.5	MIA PaCa2	TNF	1	11_9	Rep1_11_9	364.728	1.25476	1.26215
NFKB2	77	640	10.6667	MIA PaCa2	TNF	1	11_9	Rep1_11_9	373.865	1.29437	1.25832
NFKB2	78	650	10.8333	MIA PaCa2	TNF	1	11_9	Rep1_11_9	366.281	1.26418	1.25723
NFKB2	79	660	11	MIA PaCa2	TNF	1	11_9	Rep1_11_9	369.926	1.27858	1.2573
NFKB2	80	670	11.1667	MIA PaCa2	TNF	1	11_9	Rep1_11_9	355.661	1.23305	1.2577
NFKB2	81	680	11.3333	MIA PaCa2	TNF	1	11_9	Rep1_11_9	359.279	1.23999	1.24987
NFKB2	82	690	11.5	MIA PaCa2	TNF	1	11_9	Rep1_11_9	358.162	1.23617	1.24627
NFKB2	83	700	11.6667	MIA PaCa2	TNF	1	11_9	Rep1_11_9	363.064	1.25757	1.23968
NFKB2	84	710	11.8333	MIA PaCa2	TNF	1	11_9	Rep1_11_9	355.355	1.23956	1.23966
NFKB2	85	720	12	MIA PaCa2	TNF	1	11_9	Rep1_11_9	357.005	1.23894	1.23964
NFKB2	86	730	12.1667	MIA PaCa2	TNF	1	11_9	Rep1_11_9	358.428	1.23244	1.23962
NFKBIA	1	-120	-2	MIA PaCa2	TNF	1	6_10	Rep1_6_10	317.938	1.02824	1.04196
NFKBIA	2	-110	-1.83333	MIA PaCa2	TNF	1	6_10	Rep1_6_10	321.727	1.07025	1.04876
NFKBIA	3	-100	-1.66667	MIA PaCa2	TNF	1	6_10	Rep1_6_10	313.47	1.04516	1.05556
NFKBIA	4	-90	-1.5	MIA PaCa2	TNF	1	6_10	Rep1_6_10	312.571	1.06515	1.06237
NFKBIA	5	-80	-1.33333	MIA PaCa2	TNF	1	6_10	Rep1_6_10	313.717	1.06505	1.06987
NFKBIA	6	-70	-1.16667	MIA PaCa2	TNF	1	6_10	Rep1_6_10	316.741	1.09235	1.06844
NFKBIA	7	-60	-1	MIA PaCa2	TNF	1	6_10	Rep1_6_10	312.119	1.07037	1.07381
NFKBIA	8	-50	-0.833333	MIA PaCa2	TNF	1	6_10	Rep1_6_10	311.684	1.08073	1.07497
NFKBIA	9	-40	-0.666667	MIA PaCa2	TNF	1	6_10	Rep1_6_10	304.431	1.06027	1.07495
NFKBIA	10	-30	-0.5	MIA PaCa2	TNF	1	6_10	Rep1_6_10	308.356	1.08274	1.0728
NFKBIA	11	-20	-0.333333	MIA PaCa2	TNF	1	6_10	Rep1_6_10	307.106	1.07328	1.14706
NFKBIA	12	-10	-0.166667	MIA PaCa2	TNF	1	6_10	Rep1_6_10	302.121	1.06493	1.22345
NFKBIA	13	0	0	MIA PaCa2	TNF	1	6_10	Rep1_6_10	305.178	1.07726	1.30509
NFKBIA	14	10	0.166667	MIA PaCa2	TNF	1	6_10	Rep1_6_10	442.09	1.59023	1.38235
NFKBIA	15	20	0.333333	MIA PaCa2	TNF	1	6_10	Rep1_6_10	455.192	1.61546	1.46432
NFKBIA	16	30	0.5	MIA PaCa2	TNF	1	6_10	Rep1_6_10	456.298	1.63176	1.54647
NFKBIA	17	40	0.666667	MIA PaCa2	TNF	1	6_10	Rep1_6_10	454.654	1.62357	1.62973
NFKBIA	18	50	0.833333	MIA PaCa2	TNF	1	6_10	Rep1_6_10	457.664	1.64702	1.63728
NFKBIA	19	60	1	MIA PaCa2	TNF	1	6_10	Rep1_6_10	455.778	1.64	1.63877
NFKBIA	20	70	1.16667	MIA PaCa2	TNF	1	6_10	Rep1_6_10	458.903	1.66011	1.64036
NFKBIA	21	80	1.33333	MIA PaCa2	TNF	1	6_10	Rep1_6_10	454.382	1.64305	1.6398
NFKBIA	22	90	1.5	MIA PaCa2	TNF	1	6_10	Rep1_6_10	453.912	1.6259	1.63704
NFKBIA	23	100	1.66667	MIA PaCa2	TNF	1	6_10	Rep1_6_10	453.046	1.64285	1.63485
NFKBIA	24	110	1.83333	MIA PaCa2	TNF	1	6_10	Rep1_6_10	449.341	1.61969	1.63018
NFKBIA	25	120	2	MIA PaCa2	TNF	1	6_10	Rep1_6_10	452.228	1.62767	1.62915
NFKBIA	26	130	2.16667	MIA PaCa2	TNF	1	6_10	Rep1_6_10	450.601	1.62465	1.62853
NFKBIA	27	140	2.33333	MIA PaCa2	TNF	1	6_10	Rep1_6_10	450.964	1.62745	1.624
NFKBIA	28	150	2.5	MIA PaCa2	TNF	1	6_10	Rep1_6_10	451.253	1.63585	1.62087
NFKBIA	29	160	2.66667	MIA PaCa2	TNF	1	6_10	Rep1_6_10	448.088	1.62154	1.61611
NFKBIA	30	170	2.83333	MIA PaCa2	TNF	1	6_10	Rep1_6_10	443.856	1.61117	1.61105
NFKBIA	31	180	3	MIA PaCa2	TNF	1	6_10	Rep1_6_10	442.22	1.59773	1.60401
NFKBIA	32	190	3.16667	MIA PaCa2	TNF	1	6_10	Rep1_6_10	442.087	1.59438	1.59727
NFKBIA	33	200	3.33333	MIA PaCa2	TNF	1	6_10	Rep1_6_10	440.06	1.58921	1.59305
NFKBIA	34	210	3.5	MIA PaCa2	TNF	1	6_10	Rep1_6_10	438.803	1.57822	1.59013
NFKBIA	35	220	3.66667	MIA PaCa2	TNF	1	6_10	Rep1_6_10	438.736	1.58862	1.58396
NFKBIA	36	230	3.83333	MIA PaCa2	TNF	1	6_10	Rep1_6_10	437.911	1.59202	1.58232
NFKBIA	37	240	4	MIA PaCa2	TNF	1	6_10	Rep1_6_10	435.686	1.59074	1.57728
NFKBIA	38	250	4.16667	MIA PaCa2	TNF	1	6_10	Rep1_6_10	433.817	1.55451	1.57546
NFKBIA	39	260	4.33333	MIA PaCa2	TNF	1	6_10	Rep1_6_10	439.57	1.58294	1.57158
NFKBIA	40	270	4.5	MIA PaCa2	TNF	1	6_10	Rep1_6_10	430.425	1.55392	1.56715
NFKBIA	41	280	4.66667	MIA PaCa2	TNF	1	6_10	Rep1_6_10	434.208	1.56544	1.56151
NFKBIA	42	290	4.83333	MIA PaCa2	TNF	1	6_10	Rep1_6_10	430.546	1.56151	1.5617
NFKBIA	43	300	5	MIA PaCa2	TNF	1	6_10	Rep1_6_10	429.149	1.561	1.55543
NFKBIA	44	310	5.16667	MIA PaCa2	TNF	1	6_10	Rep1_6_10	432.086	1.55127	1.55395
NFKBIA	45	320	5.33333	MIA PaCa2	TNF	1	6_10	Rep1_6_10	427.929	1.55585	1.54762
NFKBIA	46	330	5.5	MIA PaCa2	TNF	1	6_10	Rep1_6_10	429.615	1.53905	1.54337
NFKBIA	47	340	5.66667	MIA PaCa2	TNF	1	6_10	Rep1_6_10	427.869	1.54352	1.53322
NFKBIA	48	350	5.83333	MIA PaCa2	TNF	1	6_10	Rep1_6_10	425.463	1.52117	1.5236
NFKBIA	49	360	6	MIA PaCa2	TNF	1	6_10	Rep1_6_10	424.589	1.5317	1.51502
NFKBIA	50	370	6.16667	MIA PaCa2	TNF	1	6_10	Rep1_6_10	416.756	1.48995	1.50433
NFKBIA	51	380	6.33333	MIA PaCa2	TNF	1	6_10	Rep1_6_10	416.311	1.48397	1.49214
NFKBIA	52	390	6.5	MIA PaCa2	TNF	1	6_10	Rep1_6_10	423.693	1.4958	1.48539
NFKBIA	53	400	6.66667	MIA PaCa2	TNF	1	6_10	Rep1_6_10	415.464	1.46422	1.47377
NFKBIA	54	410	6.83333	MIA PaCa2	TNF	1	6_10	Rep1_6_10	415.895	1.45813	1.46648
NFKBIA	55	420	7	MIA PaCa2	TNF	1	6_10	Rep1_6_10	415.102	1.47392	1.45854
NFKBIA	56	430	7.16667	MIA PaCa2	TNF	1	6_10	Rep1_6_10	411.661	1.45041	1.44872
NFKBIA	57	440	7.33333	MIA PaCa2	TNF	1	6_10	Rep1_6_10	408.569	1.43889	1.44333
NFKBIA	58	450	7.5	MIA PaCa2	TNF	1	6_10	Rep1_6_10	404.804	1.4284	1.43795
NFKBIA	59	460	7.66667	MIA PaCa2	TNF	1	6_10	Rep1_6_10	403.687	1.42707	1.42976
NFKBIA	60	470	7.83333	MIA PaCa2	TNF	1	6_10	Rep1_6_10	406.07	1.42648	1.42587
NFKBIA	61	480	8	MIA PaCa2	TNF	1	6_10	Rep1_6_10	404.783	1.42048	1.42159
NFKBIA	62	490	8.16667	MIA PaCa2	TNF	1	6_10	Rep1_6_10	401.175	1.4166	1.41652
NFKBIA	63	500	8.33333	MIA PaCa2	TNF	1	6_10	Rep1_6_10	405.562	1.42314	1.41106
NFKBIA	64	510	8.5	MIA PaCa2	TNF	1	6_10	Rep1_6_10	402.629	1.40897	1.40256
NFKBIA	65	520	8.66667	MIA PaCa2	TNF	1	6_10	Rep1_6_10	397.856	1.39287	1.39355
NFKBIA	66	530	8.83333	MIA PaCa2	TNF	1	6_10	Rep1_6_10	396.887	1.38888	1.38557
NFKBIA	67	540	9	MIA PaCa2	TNF	1	6_10	Rep1_6_10	392.261	1.36701	1.37504
NFKBIA	68	550	9.16667	MIA PaCa2	TNF	1	6_10	Rep1_6_10	388.061	1.35736	1.36292
NFKBIA	69	560	9.33333	MIA PaCa2	TNF	1	6_10	Rep1_6_10	387.967	1.36076	1.34987
NFKBIA	70	570	9.5	MIA PaCa2	TNF	1	6_10	Rep1_6_10	385.914	1.34944	1.33776
NFKBIA	71	580	9.66667	MIA PaCa2	TNF	1	6_10	Rep1_6_10	376.8	1.32409	1.32634
NFKBIA	72	590	9.83333	MIA PaCa2	TNF	1	6_10	Rep1_6_10	377.437	1.30157	1.31698
NFKBIA	73	600	10	MIA PaCa2	TNF	1	6_10	Rep1_6_10	377.128	1.30406	1.30627
NFKBIA	74	610	10.1667	MIA PaCa2	TNF	1	6_10	Rep1_6_10	376.624	1.28711	1.29451
NFKBIA	75	620	10.3333	MIA PaCa2	TNF	1	6_10	Rep1_6_10	374.591	1.29184	1.28543
NFKBIA	76	630	10.5	MIA PaCa2	TNF	1	6_10	Rep1_6_10	373.753	1.28581	1.28169
NFKBIA	77	640	10.6667	MIA PaCa2	TNF	1	6_10	Rep1_6_10	365.996	1.26712	1.27531
NFKBIA	78	650	10.8333	MIA PaCa2	TNF	1	6_10	Rep1_6_10	365.204	1.26046	1.26884
NFKBIA	79	660	11	MIA PaCa2	TNF	1	6_10	Rep1_6_10	369.003	1.27539	1.26531
NFKBIA	80	670	11.1667	MIA PaCa2	TNF	1	6_10	Rep1_6_10	363.262	1.25941	1.26181
NFKBIA	81	680	11.3333	MIA PaCa2	TNF	1	6_10	Rep1_6_10	359.828	1.24189	1.26454
NFKBIA	82	690	11.5	MIA PaCa2	TNF	1	6_10	Rep1_6_10	367.113	1.26707	1.26333
NFKBIA	83	700	11.6667	MIA PaCa2	TNF	1	6_10	Rep1_6_10	364.155	1.26135	1.25776
NFKBIA	84	710	11.8333	MIA PaCa2	TNF	1	6_10	Rep1_6_10	368.737	1.28624	1.2567
NFKBIA	85	720	12	MIA PaCa2	TNF	1	6_10	Rep1_6_10	360.754	1.25195	1.25563
NFKBIA	86	730	12.1667	MIA PaCa2	TNF	1	6_10	Rep1_6_10	359.579	1.2364	1.25457
NFKBIA	1	-120	-2	MIA PaCa2	TNF	1	6_11	Rep1_6_11	328.143	1.06124	1.06963
NFKBIA	2	-110	-1.83333	MIA PaCa2	TNF	1	6_11	Rep1_6_11	327.346	1.08894	1.07394
NFKBIA	3	-100	-1.66667	MIA PaCa2	TNF	1	6_11	Rep1_6_11	319.143	1.06407	1.07826
NFKBIA	4	-90	-1.5	MIA PaCa2	TNF	1	6_11	Rep1_6_11	318.957	1.08691	1.08258
NFKBIA	5	-80	-1.33333	MIA PaCa2	TNF	1	6_11	Rep1_6_11	320.108	1.08675	1.08711
NFKBIA	6	-70	-1.16667	MIA PaCa2	TNF	1	6_11	Rep1_6_11	322.021	1.11056	1.08623
NFKBIA	7	-60	-1	MIA PaCa2	TNF	1	6_11	Rep1_6_11	314.796	1.07955	1.08898
NFKBIA	8	-50	-0.833333	MIA PaCa2	TNF	1	6_11	Rep1_6_11	315.214	1.09297	1.0858
NFKBIA	9	-40	-0.666667	MIA PaCa2	TNF	1	6_11	Rep1_6_11	310.897	1.08279	1.08157
NFKBIA	10	-30	-0.5	MIA PaCa2	TNF	1	6_11	Rep1_6_11	308.518	1.08331	1.0781
NFKBIA	11	-20	-0.333333	MIA PaCa2	TNF	1	6_11	Rep1_6_11	304.648	1.06469	1.15582
NFKBIA	12	-10	-0.166667	MIA PaCa2	TNF	1	6_11	Rep1_6_11	299.913	1.05714	1.23611
NFKBIA	13	0	0	MIA PaCa2	TNF	1	6_11	Rep1_6_11	307.727	1.08626	1.3185
NFKBIA	14	10	0.166667	MIA PaCa2	TNF	1	6_11	Rep1_6_11	451.358	1.62357	1.39919
NFKBIA	15	20	0.333333	MIA PaCa2	TNF	1	6_11	Rep1_6_11	466.348	1.65505	1.48358
NFKBIA	16	30	0.5	MIA PaCa2	TNF	1	6_11	Rep1_6_11	464.056	1.6595	1.56771
NFKBIA	17	40	0.666667	MIA PaCa2	TNF	1	6_11	Rep1_6_11	461.527	1.64811	1.64978
NFKBIA	18	50	0.833333	MIA PaCa2	TNF	1	6_11	Rep1_6_11	460.005	1.65544	1.65114
NFKBIA	19	60	1	MIA PaCa2	TNF	1	6_11	Rep1_6_11	457.447	1.64601	1.64592
NFKBIA	20	70	1.16667	MIA PaCa2	TNF	1	6_11	Rep1_6_11	459.096	1.66081	1.64278
NFKBIA	21	80	1.33333	MIA PaCa2	TNF	1	6_11	Rep1_6_11	451.625	1.63308	1.64171
NFKBIA	22	90	1.5	MIA PaCa2	TNF	1	6_11	Rep1_6_11	451.85	1.61852	1.63736
NFKBIA	23	100	1.66667	MIA PaCa2	TNF	1	6_11	Rep1_6_11	451.562	1.63747	1.63425
NFKBIA	24	110	1.83333	MIA PaCa2	TNF	1	6_11	Rep1_6_11	455.151	1.64064	1.6271
NFKBIA	25	120	2	MIA PaCa2	TNF	1	6_11	Rep1_6_11	451.495	1.62503	1.62459
NFKBIA	26	130	2.16667	MIA PaCa2	TNF	1	6_11	Rep1_6_11	450.476	1.6242	1.62502
NFKBIA	27	140	2.33333	MIA PaCa2	TNF	1	6_11	Rep1_6_11	446.337	1.61075	1.62375
NFKBIA	28	150	2.5	MIA PaCa2	TNF	1	6_11	Rep1_6_11	445.641	1.61551	1.61977
NFKBIA	29	160	2.66667	MIA PaCa2	TNF	1	6_11	Rep1_6_11	448.095	1.62156	1.61637
NFKBIA	30	170	2.83333	MIA PaCa2	TNF	1	6_11	Rep1_6_11	448.644	1.62855	1.61106
NFKBIA	31	180	3	MIA PaCa2	TNF	1	6_11	Rep1_6_11	446.393	1.61281	1.60793
NFKBIA	32	190	3.16667	MIA PaCa2	TNF	1	6_11	Rep1_6_11	443.986	1.60123	1.60399
NFKBIA	33	200	3.33333	MIA PaCa2	TNF	1	6_11	Rep1_6_11	439.447	1.58699	1.60168
NFKBIA	34	210	3.5	MIA PaCa2	TNF	1	6_11	Rep1_6_11	441.765	1.58888	1.59909
NFKBIA	35	220	3.66667	MIA PaCa2	TNF	1	6_11	Rep1_6_11	438.55	1.58794	1.59491
NFKBIA	36	230	3.83333	MIA PaCa2	TNF	1	6_11	Rep1_6_11	441.581	1.60536	1.59494
NFKBIA	37	240	4	MIA PaCa2	TNF	1	6_11	Rep1_6_11	441.076	1.61042	1.59368
NFKBIA	38	250	4.16667	MIA PaCa2	TNF	1	6_11	Rep1_6_11	441.919	1.58354	1.59329
NFKBIA	39	260	4.33333	MIA PaCa2	TNF	1	6_11	Rep1_6_11	444.712	1.60146	1.59459
NFKBIA	40	270	4.5	MIA PaCa2	TNF	1	6_11	Rep1_6_11	437.138	1.57816	1.59206
NFKBIA	41	280	4.66667	MIA PaCa2	TNF	1	6_11	Rep1_6_11	439.949	1.58613	1.5854
NFKBIA	42	290	4.83333	MIA PaCa2	TNF	1	6_11	Rep1_6_11	440.337	1.59703	1.58294
NFKBIA	43	300	5	MIA PaCa2	TNF	1	6_11	Rep1_6_11	436.479	1.58766	1.57668
NFKBIA	44	310	5.16667	MIA PaCa2	TNF	1	6_11	Rep1_6_11	435.572	1.56379	1.57585
NFKBIA	45	320	5.33333	MIA PaCa2	TNF	1	6_11	Rep1_6_11	430.824	1.56637	1.56816
NFKBIA	46	330	5.5	MIA PaCa2	TNF	1	6_11	Rep1_6_11	434.79	1.55759	1.56137
NFKBIA	47	340	5.66667	MIA PaCa2	TNF	1	6_11	Rep1_6_11	435.865	1.57236	1.54923
NFKBIA	48	350	5.83333	MIA PaCa2	TNF	1	6_11	Rep1_6_11	428.574	1.5323	1.54235
NFKBIA	49	360	6	MIA PaCa2	TNF	1	6_11	Rep1_6_11	429.524	1.54951	1.52766
NFKBIA	50	370	6.16667	MIA PaCa2	TNF	1	6_11	Rep1_6_11	420.319	1.50269	1.51979
NFKBIA	51	380	6.33333	MIA PaCa2	TNF	1	6_11	Rep1_6_11	425.189	1.51561	1.50623
NFKBIA	52	390	6.5	MIA PaCa2	TNF	1	6_11	Rep1_6_11	414.57	1.46359	1.5
NFKBIA	53	400	6.66667	MIA PaCa2	TNF	1	6_11	Rep1_6_11	426.322	1.50249	1.48856
NFKBIA	54	410	6.83333	MIA PaCa2	TNF	1	6_11	Rep1_6_11	421.398	1.47743	1.48173
NFKBIA	55	420	7	MIA PaCa2	TNF	1	6_11	Rep1_6_11	419.259	1.48868	1.47086
NFKBIA	56	430	7.16667	MIA PaCa2	TNF	1	6_11	Rep1_6_11	417.066	1.46945	1.46826
NFKBIA	57	440	7.33333	MIA PaCa2	TNF	1	6_11	Rep1_6_11	413.112	1.45489	1.45892
NFKBIA	58	450	7.5	MIA PaCa2	TNF	1	6_11	Rep1_6_11	407.946	1.43948	1.45442
NFKBIA	59	460	7.66667	MIA PaCa2	TNF	1	6_11	Rep1_6_11	408.875	1.44541	1.44484
NFKBIA	60	470	7.83333	MIA PaCa2	TNF	1	6_11	Rep1_6_11	409.089	1.43709	1.43527
NFKBIA	61	480	8	MIA PaCa2	TNF	1	6_11	Rep1_6_11	412.045	1.44597	1.42995
NFKBIA	62	490	8.16667	MIA PaCa2	TNF	1	6_11	Rep1_6_11	402.59	1.42159	1.42783
NFKBIA	63	500	8.33333	MIA PaCa2	TNF	1	6_11	Rep1_6_11	399.661	1.40243	1.42286
NFKBIA	64	510	8.5	MIA PaCa2	TNF	1	6_11	Rep1_6_11	405.117	1.41767	1.41495
NFKBIA	65	520	8.66667	MIA PaCa2	TNF	1	6_11	Rep1_6_11	406.93	1.42463	1.40752
NFKBIA	66	530	8.83333	MIA PaCa2	TNF	1	6_11	Rep1_6_11	403.098	1.41062	1.40395
NFKBIA	67	540	9	MIA PaCa2	TNF	1	6_11	Rep1_6_11	396.475	1.3817	1.40181
NFKBIA	68	550	9.16667	MIA PaCa2	TNF	1	6_11	Rep1_6_11	398.539	1.39401	1.39541
NFKBIA	69	560	9.33333	MIA PaCa2	TNF	1	6_11	Rep1_6_11	398.175	1.39656	1.38276
NFKBIA	70	570	9.5	MIA PaCa2	TNF	1	6_11	Rep1_6_11	396.792	1.38748	1.37121
NFKBIA	71	580	9.66667	MIA PaCa2	TNF	1	6_11	Rep1_6_11	390.679	1.37286	1.36233
NFKBIA	72	590	9.83333	MIA PaCa2	TNF	1	6_11	Rep1_6_11	387.458	1.33612	1.35384
NFKBIA	73	600	10	MIA PaCa2	TNF	1	6_11	Rep1_6_11	384.544	1.32971	1.34294
NFKBIA	74	610	10.1667	MIA PaCa2	TNF	1	6_11	Rep1_6_11	386.113	1.31954	1.33192
NFKBIA	75	620	10.3333	MIA PaCa2	TNF	1	6_11	Rep1_6_11	386.997	1.33462	1.32433
NFKBIA	76	630	10.5	MIA PaCa2	TNF	1	6_11	Rep1_6_11	383.769	1.32027	1.32152
NFKBIA	77	640	10.6667	MIA PaCa2	TNF	1	6_11	Rep1_6_11	378.475	1.31033	1.31553
NFKBIA	78	650	10.8333	MIA PaCa2	TNF	1	6_11	Rep1_6_11	382.369	1.31971	1.31031
NFKBIA	79	660	11	MIA PaCa2	TNF	1	6_11	Rep1_6_11	380.899	1.3165	1.30178
NFKBIA	80	670	11.1667	MIA PaCa2	TNF	1	6_11	Rep1_6_11	371.427	1.28771	1.29495
NFKBIA	81	680	11.3333	MIA PaCa2	TNF	1	6_11	Rep1_6_11	371.752	1.28304	1.29133
NFKBIA	82	690	11.5	MIA PaCa2	TNF	1	6_11	Rep1_6_11	369.386	1.27491	1.28586
NFKBIA	83	700	11.6667	MIA PaCa2	TNF	1	6_11	Rep1_6_11	367.368	1.27248	1.27901
NFKBIA	84	710	11.8333	MIA PaCa2	TNF	1	6_11	Rep1_6_11	368.362	1.28493	1.2772
NFKBIA	85	720	12	MIA PaCa2	TNF	1	6_11	Rep1_6_11	369.255	1.28145	1.27539
NFKBIA	86	730	12.1667	MIA PaCa2	TNF	1	6_11	Rep1_6_11	368.928	1.26855	1.27358
NFKBIA	1	-120	-2	MIA PaCa2	Control	1	6_3	Rep1_6_3	318.856	1.03121	1.03634
NFKBIA	2	-110	-1.83333	MIA PaCa2	Control	1	6_3	Rep1_6_3	315.079	1.04813	1.03995
NFKBIA	3	-100	-1.66667	MIA PaCa2	Control	1	6_3	Rep1_6_3	307.682	1.02586	1.04355
NFKBIA	4	-90	-1.5	MIA PaCa2	Control	1	6_3	Rep1_6_3	312.759	1.06579	1.04715
NFKBIA	5	-80	-1.33333	MIA PaCa2	Control	1	6_3	Rep1_6_3	309.116	1.04944	1.05127
NFKBIA	6	-70	-1.16667	MIA PaCa2	Control	1	6_3	Rep1_6_3	307.856	1.06171	1.05131
NFKBIA	7	-60	-1	MIA PaCa2	Control	1	6_3	Rep1_6_3	305.576	1.04794	1.05657
NFKBIA	8	-50	-0.833333	MIA PaCa2	Control	1	6_3	Rep1_6_3	305.713	1.06002	1.05325
NFKBIA	9	-40	-0.666667	MIA PaCa2	Control	1	6_3	Rep1_6_3	301.029	1.04842	1.05243
NFKBIA	10	-30	-0.5	MIA PaCa2	Control	1	6_3	Rep1_6_3	302.651	1.06271	1.05146
NFKBIA	11	-20	-0.333333	MIA PaCa2	Control	1	6_3	Rep1_6_3	298.314	1.04255	1.05377
NFKBIA	12	-10	-0.166667	MIA PaCa2	Control	1	6_3	Rep1_6_3	296.079	1.04363	1.0501
NFKBIA	13	0	0	MIA PaCa2	Control	1	6_3	Rep1_6_3	298.864	1.05497	1.04783
NFKBIA	14	10	0.166667	MIA PaCa2	Control	1	6_3	Rep1_6_3	295.814	1.06407	1.04435
NFKBIA	15	20	0.333333	MIA PaCa2	Control	1	6_3	Rep1_6_3	291.456	1.03436	1.04359
NFKBIA	16	30	0.5	MIA PaCa2	Control	1	6_3	Rep1_6_3	288.727	1.03251	1.0447
NFKBIA	17	40	0.666667	MIA PaCa2	Control	1	6_3	Rep1_6_3	290.782	1.03838	1.04453
NFKBIA	18	50	0.833333	MIA PaCa2	Control	1	6_3	Rep1_6_3	288.222	1.03724	1.03964
NFKBIA	19	60	1	MIA PaCa2	Control	1	6_3	Rep1_6_3	292.195	1.05139	1.03877
NFKBIA	20	70	1.16667	MIA PaCa2	Control	1	6_3	Rep1_6_3	291.288	1.05375	1.04069
NFKBIA	21	80	1.33333	MIA PaCa2	Control	1	6_3	Rep1_6_3	284.806	1.02986	1.04081
NFKBIA	22	90	1.5	MIA PaCa2	Control	1	6_3	Rep1_6_3	287.071	1.02828	1.04247
NFKBIA	23	100	1.66667	MIA PaCa2	Control	1	6_3	Rep1_6_3	288.426	1.0459	1.03925
NFKBIA	24	110	1.83333	MIA PaCa2	Control	1	6_3	Rep1_6_3	288.31	1.03924	1.03488
NFKBIA	25	120	2	MIA PaCa2	Control	1	6_3	Rep1_6_3	291.416	1.04887	1.0348
NFKBIA	26	130	2.16667	MIA PaCa2	Control	1	6_3	Rep1_6_3	285.353	1.02885	1.03587
NFKBIA	27	140	2.33333	MIA PaCa2	Control	1	6_3	Rep1_6_3	283.508	1.02313	1.03213
NFKBIA	28	150	2.5	MIA PaCa2	Control	1	6_3	Rep1_6_3	283.941	1.02932	1.02921
NFKBIA	29	160	2.66667	MIA PaCa2	Control	1	6_3	Rep1_6_3	286.228	1.0358	1.02444
NFKBIA	30	170	2.83333	MIA PaCa2	Control	1	6_3	Rep1_6_3	280.909	1.01968	1.0242
NFKBIA	31	180	3	MIA PaCa2	Control	1	6_3	Rep1_6_3	281.993	1.01884	1.02323
NFKBIA	32	190	3.16667	MIA PaCa2	Control	1	6_3	Rep1_6_3	281.565	1.01546	1.02296
NFKBIA	33	200	3.33333	MIA PaCa2	Control	1	6_3	Rep1_6_3	284.435	1.02719	1.02029
NFKBIA	34	210	3.5	MIA PaCa2	Control	1	6_3	Rep1_6_3	282.572	1.01631	1.02107
NFKBIA	35	220	3.66667	MIA PaCa2	Control	1	6_3	Rep1_6_3	283.755	1.02745	1.01811
NFKBIA	36	230	3.83333	MIA PaCa2	Control	1	6_3	Rep1_6_3	279.764	1.01708	1.01702
NFKBIA	37	240	4	MIA PaCa2	Control	1	6_3	Rep1_6_3	280.781	1.02516	1.01229
NFKBIA	38	250	4.16667	MIA PaCa2	Control	1	6_3	Rep1_6_3	278.547	0.998125	1.01012
NFKBIA	39	260	4.33333	MIA PaCa2	Control	1	6_3	Rep1_6_3	279.87	1.00784	1.00884
NFKBIA	40	270	4.5	MIA PaCa2	Control	1	6_3	Rep1_6_3	275.351	0.994073	1.00937
NFKBIA	41	280	4.66667	MIA PaCa2	Control	1	6_3	Rep1_6_3	277.672	1.00108	1.00778
NFKBIA	42	290	4.83333	MIA PaCa2	Control	1	6_3	Rep1_6_3	280.835	1.01854	1.01316
NFKBIA	43	300	5	MIA PaCa2	Control	1	6_3	Rep1_6_3	280.626	1.02076	1.01729
NFKBIA	44	310	5.16667	MIA PaCa2	Control	1	6_3	Rep1_6_3	282.442	1.01402	1.02326
NFKBIA	45	320	5.33333	MIA PaCa2	Control	1	6_3	Rep1_6_3	284.891	1.03579	1.02534
NFKBIA	46	330	5.5	MIA PaCa2	Control	1	6_3	Rep1_6_3	289.411	1.03679	1.02559
NFKBIA	47	340	5.66667	MIA PaCa2	Control	1	6_3	Rep1_6_3	287.131	1.03581	1.02444
NFKBIA	48	350	5.83333	MIA PaCa2	Control	1	6_3	Rep1_6_3	284.086	1.0157	1.02522
NFKBIA	49	360	6	MIA PaCa2	Control	1	6_3	Rep1_6_3	282.825	1.02029	1.0221
NFKBIA	50	370	6.16667	MIA PaCa2	Control	1	6_3	Rep1_6_3	283.263	1.0127	1.017
NFKBIA	51	380	6.33333	MIA PaCa2	Control	1	6_3	Rep1_6_3	285.99	1.01943	1.01132
NFKBIA	52	390	6.5	MIA PaCa2	Control	1	6_3	Rep1_6_3	287.214	1.01398	1.00942
NFKBIA	53	400	6.66667	MIA PaCa2	Control	1	6_3	Rep1_6_3	284.047	1.00107	1.00643
NFKBIA	54	410	6.83333	MIA PaCa2	Control	1	6_3	Rep1_6_3	284.102	0.996067	1.00646
NFKBIA	55	420	7	MIA PaCa2	Control	1	6_3	Rep1_6_3	282.316	1.00243	1.00599
NFKBIA	56	430	7.16667	MIA PaCa2	Control	1	6_3	Rep1_6_3	283.641	0.999352	1.00776
NFKBIA	57	440	7.33333	MIA PaCa2	Control	1	6_3	Rep1_6_3	287.602	1.01287	1.00944
NFKBIA	58	450	7.5	MIA PaCa2	Control	1	6_3	Rep1_6_3	287.97	1.01613	1.01122
NFKBIA	59	460	7.66667	MIA PaCa2	Control	1	6_3	Rep1_6_3	290.353	1.02642	1.0116
NFKBIA	60	470	7.83333	MIA PaCa2	Control	1	6_3	Rep1_6_3	288.316	1.01282	1.01248
NFKBIA	61	480	8	MIA PaCa2	Control	1	6_3	Rep1_6_3	287.395	1.00854	1.01281
NFKBIA	62	490	8.16667	MIA PaCa2	Control	1	6_3	Rep1_6_3	284.628	1.00506	1.01076
NFKBIA	63	500	8.33333	MIA PaCa2	Control	1	6_3	Rep1_6_3	286.542	1.00549	1.01223
NFKBIA	64	510	8.5	MIA PaCa2	Control	1	6_3	Rep1_6_3	290.117	1.01524	1.01328
NFKBIA	65	520	8.66667	MIA PaCa2	Control	1	6_3	Rep1_6_3	286.135	1.00174	1.01535
NFKBIA	66	530	8.83333	MIA PaCa2	Control	1	6_3	Rep1_6_3	296.246	1.0367	1.01779
NFKBIA	67	540	9	MIA PaCa2	Control	1	6_3	Rep1_6_3	292.745	1.02021	1.01801
NFKBIA	68	550	9.16667	MIA PaCa2	Control	1	6_3	Rep1_6_3	292.468	1.02299	1.01861
NFKBIA	69	560	9.33333	MIA PaCa2	Control	1	6_3	Rep1_6_3	291.423	1.02214	1.01736
NFKBIA	70	570	9.5	MIA PaCa2	Control	1	6_3	Rep1_6_3	287.991	1.00703	1.0126
NFKBIA	71	580	9.66667	MIA PaCa2	Control	1	6_3	Rep1_6_3	290.119	1.01949	1.00805
NFKBIA	72	590	9.83333	MIA PaCa2	Control	1	6_3	Rep1_6_3	287.953	0.992986	1.00405
NFKBIA	73	600	10	MIA PaCa2	Control	1	6_3	Rep1_6_3	290.169	1.00337	1.00277
NFKBIA	74	610	10.1667	MIA PaCa2	Control	1	6_3	Rep1_6_3	289.208	0.98837	1.00285
NFKBIA	75	620	10.3333	MIA PaCa2	Control	1	6_3	Rep1_6_3	288.499	0.994934	1.00153
NFKBIA	76	630	10.5	MIA PaCa2	Control	1	6_3	Rep1_6_3	294.508	1.01318	1.0036
NFKBIA	77	640	10.6667	MIA PaCa2	Control	1	6_3	Rep1_6_3	291.038	1.00761	1.00462
NFKBIA	78	650	10.8333	MIA PaCa2	Control	1	6_3	Rep1_6_3	292.699	1.01022	1.00436
NFKBIA	79	660	11	MIA PaCa2	Control	1	6_3	Rep1_6_3	291.502	1.00752	1.00632
NFKBIA	80	670	11.1667	MIA PaCa2	Control	1	6_3	Rep1_6_3	291.46	1.01047	1.00602
NFKBIA	81	680	11.3333	MIA PaCa2	Control	1	6_3	Rep1_6_3	285.852	0.986572	1.00578
NFKBIA	82	690	11.5	MIA PaCa2	Control	1	6_3	Rep1_6_3	292.239	1.00864	1.00565
NFKBIA	83	700	11.6667	MIA PaCa2	Control	1	6_3	Rep1_6_3	291.902	1.01108	1.00671
NFKBIA	84	710	11.8333	MIA PaCa2	Control	1	6_3	Rep1_6_3	288.386	1.00596	1.00871
NFKBIA	85	720	12	MIA PaCa2	Control	1	6_3	Rep1_6_3	290.838	1.00931	1.01072
NFKBIA	86	730	12.1667	MIA PaCa2	Control	1	6_3	Rep1_6_3	295.165	1.01491	1.01272
NFKBIA	1	-120	-2	MIA PaCa2	Control	1	6_4	Rep1_6_4	334.533	1.08191	1.08011
NFKBIA	2	-110	-1.83333	MIA PaCa2	Control	1	6_4	Rep1_6_4	326.172	1.08504	1.07801
NFKBIA	3	-100	-1.66667	MIA PaCa2	Control	1	6_4	Rep1_6_4	320.715	1.06932	1.07591
NFKBIA	4	-90	-1.5	MIA PaCa2	Control	1	6_4	Rep1_6_4	316.389	1.07816	1.07381
NFKBIA	5	-80	-1.33333	MIA PaCa2	Control	1	6_4	Rep1_6_4	312.276	1.06016	1.07281
NFKBIA	6	-70	-1.16667	MIA PaCa2	Control	1	6_4	Rep1_6_4	307.387	1.06009	1.07076
NFKBIA	7	-60	-1	MIA PaCa2	Control	1	6_4	Rep1_6_4	315.509	1.082	1.07334
NFKBIA	8	-50	-0.833333	MIA PaCa2	Control	1	6_4	Rep1_6_4	310	1.07489	1.07333
NFKBIA	9	-40	-0.666667	MIA PaCa2	Control	1	6_4	Rep1_6_4	307.426	1.0707	1.07633
NFKBIA	10	-30	-0.5	MIA PaCa2	Control	1	6_4	Rep1_6_4	309.684	1.08741	1.07912
NFKBIA	11	-20	-0.333333	MIA PaCa2	Control	1	6_4	Rep1_6_4	308.475	1.07806	1.07784
NFKBIA	12	-10	-0.166667	MIA PaCa2	Control	1	6_4	Rep1_6_4	306.722	1.08114	1.07638
NFKBIA	13	0	0	MIA PaCa2	Control	1	6_4	Rep1_6_4	305.85	1.07963	1.07433
NFKBIA	14	10	0.166667	MIA PaCa2	Control	1	6_4	Rep1_6_4	298.318	1.07307	1.06924
NFKBIA	15	20	0.333333	MIA PaCa2	Control	1	6_4	Rep1_6_4	299.999	1.06468	1.06477
NFKBIA	16	30	0.5	MIA PaCa2	Control	1	6_4	Rep1_6_4	295.393	1.05635	1.05766
NFKBIA	17	40	0.666667	MIA PaCa2	Control	1	6_4	Rep1_6_4	294.528	1.05176	1.05613
NFKBIA	18	50	0.833333	MIA PaCa2	Control	1	6_4	Rep1_6_4	290.871	1.04677	1.05554
NFKBIA	19	60	1	MIA PaCa2	Control	1	6_4	Rep1_6_4	286.625	1.03135	1.05423
NFKBIA	20	70	1.16667	MIA PaCa2	Control	1	6_4	Rep1_6_4	295.476	1.0689	1.05645
NFKBIA	21	80	1.33333	MIA PaCa2	Control	1	6_4	Rep1_6_4	295.619	1.06896	1.05742
NFKBIA	22	90	1.5	MIA PaCa2	Control	1	6_4	Rep1_6_4	294.674	1.05552	1.0583
NFKBIA	23	100	1.66667	MIA PaCa2	Control	1	6_4	Rep1_6_4	295.593	1.07189	1.06184
NFKBIA	24	110	1.83333	MIA PaCa2	Control	1	6_4	Rep1_6_4	293.662	1.05853	1.05813
NFKBIA	25	120	2	MIA PaCa2	Control	1	6_4	Rep1_6_4	292.561	1.05299	1.05628
NFKBIA	26	130	2.16667	MIA PaCa2	Control	1	6_4	Rep1_6_4	292.909	1.05609	1.05496
NFKBIA	27	140	2.33333	MIA PaCa2	Control	1	6_4	Rep1_6_4	288.997	1.04294	1.05058
NFKBIA	28	150	2.5	MIA PaCa2	Control	1	6_4	Rep1_6_4	291.303	1.05601	1.04645
NFKBIA	29	160	2.66667	MIA PaCa2	Control	1	6_4	Rep1_6_4	289.116	1.04625	1.04566
NFKBIA	30	170	2.83333	MIA PaCa2	Control	1	6_4	Rep1_6_4	286.848	1.04124	1.04304
NFKBIA	31	180	3	MIA PaCa2	Control	1	6_4	Rep1_6_4	284.977	1.02962	1.04126
NFKBIA	32	190	3.16667	MIA PaCa2	Control	1	6_4	Rep1_6_4	290.447	1.04749	1.03664
NFKBIA	33	200	3.33333	MIA PaCa2	Control	1	6_4	Rep1_6_4	287.343	1.03769	1.03607
NFKBIA	34	210	3.5	MIA PaCa2	Control	1	6_4	Rep1_6_4	286.52	1.03051	1.03558
NFKBIA	35	220	3.66667	MIA PaCa2	Control	1	6_4	Rep1_6_4	282.708	1.02366	1.03463
NFKBIA	36	230	3.83333	MIA PaCa2	Control	1	6_4	Rep1_6_4	286.694	1.04228	1.03108
NFKBIA	37	240	4	MIA PaCa2	Control	1	6_4	Rep1_6_4	284.251	1.03783	1.02884
NFKBIA	38	250	4.16667	MIA PaCa2	Control	1	6_4	Rep1_6_4	285.481	1.02297	1.03199
NFKBIA	39	260	4.33333	MIA PaCa2	Control	1	6_4	Rep1_6_4	283.975	1.02263	1.03441
NFKBIA	40	270	4.5	MIA PaCa2	Control	1	6_4	Rep1_6_4	283.09	1.02201	1.03547
NFKBIA	41	280	4.66667	MIA PaCa2	Control	1	6_4	Rep1_6_4	291.956	1.05258	1.03365
NFKBIA	42	290	4.83333	MIA PaCa2	Control	1	6_4	Rep1_6_4	286.908	1.04056	1.03613
NFKBIA	43	300	5	MIA PaCa2	Control	1	6_4	Rep1_6_4	288.586	1.04971	1.03678
NFKBIA	44	310	5.16667	MIA PaCa2	Control	1	6_4	Rep1_6_4	285.518	1.02507	1.03999
NFKBIA	45	320	5.33333	MIA PaCa2	Control	1	6_4	Rep1_6_4	286.151	1.04038	1.03507
NFKBIA	46	330	5.5	MIA PaCa2	Control	1	6_4	Rep1_6_4	286.721	1.02715	1.0363
NFKBIA	47	340	5.66667	MIA PaCa2	Control	1	6_4	Rep1_6_4	289.53	1.04446	1.03299
NFKBIA	48	350	5.83333	MIA PaCa2	Control	1	6_4	Rep1_6_4	284.767	1.01814	1.03412
NFKBIA	49	360	6	MIA PaCa2	Control	1	6_4	Rep1_6_4	290.835	1.04919	1.03346
NFKBIA	50	370	6.16667	MIA PaCa2	Control	1	6_4	Rep1_6_4	287.146	1.02658	1.03448
NFKBIA	51	380	6.33333	MIA PaCa2	Control	1	6_4	Rep1_6_4	289.787	1.03297	1.03058
NFKBIA	52	390	6.5	MIA PaCa2	Control	1	6_4	Rep1_6_4	293.368	1.0357	1.03486
NFKBIA	53	400	6.66667	MIA PaCa2	Control	1	6_4	Rep1_6_4	293.477	1.0343	1.03213
NFKBIA	54	410	6.83333	MIA PaCa2	Control	1	6_4	Rep1_6_4	290.124	1.01718	1.03546
NFKBIA	55	420	7	MIA PaCa2	Control	1	6_4	Rep1_6_4	295.17	1.04807	1.0378
NFKBIA	56	430	7.16667	MIA PaCa2	Control	1	6_4	Rep1_6_4	292.365	1.03009	1.03958
NFKBIA	57	440	7.33333	MIA PaCa2	Control	1	6_4	Rep1_6_4	298.119	1.04991	1.03888
NFKBIA	58	450	7.5	MIA PaCa2	Control	1	6_4	Rep1_6_4	297.382	1.04935	1.04085
NFKBIA	59	460	7.66667	MIA PaCa2	Control	1	6_4	Rep1_6_4	296.494	1.04813	1.044
NFKBIA	60	470	7.83333	MIA PaCa2	Control	1	6_4	Rep1_6_4	293.034	1.0294	1.04933
NFKBIA	61	480	8	MIA PaCa2	Control	1	6_4	Rep1_6_4	293.787	1.03097	1.04802
NFKBIA	62	490	8.16667	MIA PaCa2	Control	1	6_4	Rep1_6_4	303.062	1.07015	1.04926
NFKBIA	63	500	8.33333	MIA PaCa2	Control	1	6_4	Rep1_6_4	304.192	1.06743	1.04759
NFKBIA	64	510	8.5	MIA PaCa2	Control	1	6_4	Rep1_6_4	297.396	1.04071	1.05037
NFKBIA	65	520	8.66667	MIA PaCa2	Control	1	6_4	Rep1_6_4	302.216	1.05804	1.0523
NFKBIA	66	530	8.83333	MIA PaCa2	Control	1	6_4	Rep1_6_4	296.166	1.03642	1.04935
NFKBIA	67	540	9	MIA PaCa2	Control	1	6_4	Rep1_6_4	300.969	1.04887	1.04722
NFKBIA	68	550	9.16667	MIA PaCa2	Control	1	6_4	Rep1_6_4	298.62	1.04451	1.05023
NFKBIA	69	560	9.33333	MIA PaCa2	Control	1	6_4	Rep1_6_4	299.227	1.04951	1.04712
NFKBIA	70	570	9.5	MIA PaCa2	Control	1	6_4	Rep1_6_4	300.987	1.05247	1.04769
NFKBIA	71	580	9.66667	MIA PaCa2	Control	1	6_4	Rep1_6_4	302.149	1.06176	1.04403
NFKBIA	72	590	9.83333	MIA PaCa2	Control	1	6_4	Rep1_6_4	300.506	1.03628	1.04311
NFKBIA	73	600	10	MIA PaCa2	Control	1	6_4	Rep1_6_4	300.894	1.04046	1.04188
NFKBIA	74	610	10.1667	MIA PaCa2	Control	1	6_4	Rep1_6_4	299.405	1.02322	1.04083
NFKBIA	75	620	10.3333	MIA PaCa2	Control	1	6_4	Rep1_6_4	301.015	1.0381	1.03811
NFKBIA	76	630	10.5	MIA PaCa2	Control	1	6_4	Rep1_6_4	302.556	1.04087	1.04027
NFKBIA	77	640	10.6667	MIA PaCa2	Control	1	6_4	Rep1_6_4	301.868	1.04511	1.04111
NFKBIA	78	650	10.8333	MIA PaCa2	Control	1	6_4	Rep1_6_4	302.127	1.04276	1.04285
NFKBIA	79	660	11	MIA PaCa2	Control	1	6_4	Rep1_6_4	304.191	1.05138	1.04713
NFKBIA	80	670	11.1667	MIA PaCa2	Control	1	6_4	Rep1_6_4	301.802	1.04633	1.04741
NFKBIA	81	680	11.3333	MIA PaCa2	Control	1	6_4	Rep1_6_4	300	1.0354	1.04724
NFKBIA	82	690	11.5	MIA PaCa2	Control	1	6_4	Rep1_6_4	309.453	1.06806	1.04784
NFKBIA	83	700	11.6667	MIA PaCa2	Control	1	6_4	Rep1_6_4	301.074	1.04285	1.04496
NFKBIA	84	710	11.8333	MIA PaCa2	Control	1	6_4	Rep1_6_4	299.265	1.04391	1.0433
NFKBIA	85	720	12	MIA PaCa2	Control	1	6_4	Rep1_6_4	301.685	1.04696	1.04165
NFKBIA	86	730	12.1667	MIA PaCa2	Control	1	6_4	Rep1_6_4	299.906	1.03122	1.03999
NFKBIA	1	-120	-2	MIA PaCa2	Control	1	6_5	Rep1_6_5	311.409	1.00712	1.04131
NFKBIA	2	-110	-1.83333	MIA PaCa2	Control	1	6_5	Rep1_6_5	320.021	1.06458	1.04688
NFKBIA	3	-100	-1.66667	MIA PaCa2	Control	1	6_5	Rep1_6_5	321.129	1.0707	1.05245
NFKBIA	4	-90	-1.5	MIA PaCa2	Control	1	6_5	Rep1_6_5	315.096	1.07375	1.05803
NFKBIA	5	-80	-1.33333	MIA PaCa2	Control	1	6_5	Rep1_6_5	313.608	1.06469	1.06578
NFKBIA	6	-70	-1.16667	MIA PaCa2	Control	1	6_5	Rep1_6_5	308.36	1.06344	1.06391
NFKBIA	7	-60	-1	MIA PaCa2	Control	1	6_5	Rep1_6_5	309.647	1.0619	1.05938
NFKBIA	8	-50	-0.833333	MIA PaCa2	Control	1	6_5	Rep1_6_5	306.11	1.0614	1.05537
NFKBIA	9	-40	-0.666667	MIA PaCa2	Control	1	6_5	Rep1_6_5	301.922	1.05153	1.05008
NFKBIA	10	-30	-0.5	MIA PaCa2	Control	1	6_5	Rep1_6_5	295.892	1.03898	1.04705
NFKBIA	11	-20	-0.333333	MIA PaCa2	Control	1	6_5	Rep1_6_5	299.198	1.04564	1.04735
NFKBIA	12	-10	-0.166667	MIA PaCa2	Control	1	6_5	Rep1_6_5	291.55	1.02766	1.04194
NFKBIA	13	0	0	MIA PaCa2	Control	1	6_5	Rep1_6_5	295.267	1.04228	1.04055
NFKBIA	14	10	0.166667	MIA PaCa2	Control	1	6_5	Rep1_6_5	295.795	1.064	1.03855
NFKBIA	15	20	0.333333	MIA PaCa2	Control	1	6_5	Rep1_6_5	288.403	1.02353	1.03731
NFKBIA	16	30	0.5	MIA PaCa2	Control	1	6_5	Rep1_6_5	291.323	1.04179	1.03753
NFKBIA	17	40	0.666667	MIA PaCa2	Control	1	6_5	Rep1_6_5	287.025	1.02497	1.03829
NFKBIA	18	50	0.833333	MIA PaCa2	Control	1	6_5	Rep1_6_5	288.145	1.03696	1.03667
NFKBIA	19	60	1	MIA PaCa2	Control	1	6_5	Rep1_6_5	286.025	1.02919	1.03596
NFKBIA	20	70	1.16667	MIA PaCa2	Control	1	6_5	Rep1_6_5	289.595	1.04763	1.03593
NFKBIA	21	80	1.33333	MIA PaCa2	Control	1	6_5	Rep1_6_5	291.106	1.05264	1.0376
NFKBIA	22	90	1.5	MIA PaCa2	Control	1	6_5	Rep1_6_5	284.359	1.01857	1.03788
NFKBIA	23	100	1.66667	MIA PaCa2	Control	1	6_5	Rep1_6_5	287.233	1.04157	1.03829
NFKBIA	24	110	1.83333	MIA PaCa2	Control	1	6_5	Rep1_6_5	287.584	1.03663	1.03581
NFKBIA	25	120	2	MIA PaCa2	Control	1	6_5	Rep1_6_5	288.665	1.03897	1.03347
NFKBIA	26	130	2.16667	MIA PaCa2	Control	1	6_5	Rep1_6_5	286.246	1.03207	1.03598
NFKBIA	27	140	2.33333	MIA PaCa2	Control	1	6_5	Rep1_6_5	285.469	1.03021	1.0367
NFKBIA	28	150	2.5	MIA PaCa2	Control	1	6_5	Rep1_6_5	285.864	1.03629	1.03793
NFKBIA	29	160	2.66667	MIA PaCa2	Control	1	6_5	Rep1_6_5	286.321	1.03614	1.03838
NFKBIA	30	170	2.83333	MIA PaCa2	Control	1	6_5	Rep1_6_5	288.325	1.0466	1.04002
NFKBIA	31	180	3	MIA PaCa2	Control	1	6_5	Rep1_6_5	289.303	1.04524	1.0402
NFKBIA	32	190	3.16667	MIA PaCa2	Control	1	6_5	Rep1_6_5	288.964	1.04214	1.04042
NFKBIA	33	200	3.33333	MIA PaCa2	Control	1	6_5	Rep1_6_5	288.947	1.04349	1.04114
NFKBIA	34	210	3.5	MIA PaCa2	Control	1	6_5	Rep1_6_5	286.788	1.03148	1.04113
NFKBIA	35	220	3.66667	MIA PaCa2	Control	1	6_5	Rep1_6_5	286.625	1.03784	1.03705
NFKBIA	36	230	3.83333	MIA PaCa2	Control	1	6_5	Rep1_6_5	286.401	1.04121	1.03503
NFKBIA	37	240	4	MIA PaCa2	Control	1	6_5	Rep1_6_5	286.621	1.04649	1.03598
NFKBIA	38	250	4.16667	MIA PaCa2	Control	1	6_5	Rep1_6_5	283.723	1.01667	1.03842
NFKBIA	39	260	4.33333	MIA PaCa2	Control	1	6_5	Rep1_6_5	285.469	1.02801	1.03725
NFKBIA	40	270	4.5	MIA PaCa2	Control	1	6_5	Rep1_6_5	290.889	1.05017	1.03825
NFKBIA	41	280	4.66667	MIA PaCa2	Control	1	6_5	Rep1_6_5	290.836	1.04854	1.03504
NFKBIA	42	290	4.83333	MIA PaCa2	Control	1	6_5	Rep1_6_5	283.896	1.02964	1.04
NFKBIA	43	300	5	MIA PaCa2	Control	1	6_5	Rep1_6_5	288.175	1.04822	1.03984
NFKBIA	44	310	5.16667	MIA PaCa2	Control	1	6_5	Rep1_6_5	285.23	1.02403	1.03856
NFKBIA	45	320	5.33333	MIA PaCa2	Control	1	6_5	Rep1_6_5	289.184	1.05141	1.0342
NFKBIA	46	330	5.5	MIA PaCa2	Control	1	6_5	Rep1_6_5	286.649	1.02689	1.03713
NFKBIA	47	340	5.66667	MIA PaCa2	Control	1	6_5	Rep1_6_5	288.618	1.04118	1.03649
NFKBIA	48	350	5.83333	MIA PaCa2	Control	1	6_5	Rep1_6_5	284.743	1.01805	1.04002
NFKBIA	49	360	6	MIA PaCa2	Control	1	6_5	Rep1_6_5	291.097	1.05013	1.03869
NFKBIA	50	370	6.16667	MIA PaCa2	Control	1	6_5	Rep1_6_5	291.945	1.04374	1.03723
NFKBIA	51	380	6.33333	MIA PaCa2	Control	1	6_5	Rep1_6_5	294.222	1.04877	1.03461
NFKBIA	52	390	6.5	MIA PaCa2	Control	1	6_5	Rep1_6_5	295.175	1.04208	1.03712
NFKBIA	53	400	6.66667	MIA PaCa2	Control	1	6_5	Rep1_6_5	288.466	1.01664	1.03179
NFKBIA	54	410	6.83333	MIA PaCa2	Control	1	6_5	Rep1_6_5	291.737	1.02283	1.02878
NFKBIA	55	420	7	MIA PaCa2	Control	1	6_5	Rep1_6_5	291.667	1.03563	1.02861
NFKBIA	56	430	7.16667	MIA PaCa2	Control	1	6_5	Rep1_6_5	287.475	1.01286	1.02826
NFKBIA	57	440	7.33333	MIA PaCa2	Control	1	6_5	Rep1_6_5	290.373	1.02263	1.03029
NFKBIA	58	450	7.5	MIA PaCa2	Control	1	6_5	Rep1_6_5	296.875	1.04756	1.03092
NFKBIA	59	460	7.66667	MIA PaCa2	Control	1	6_5	Rep1_6_5	294.105	1.03969	1.0323
NFKBIA	60	470	7.83333	MIA PaCa2	Control	1	6_5	Rep1_6_5	293.431	1.0308	1.03546
NFKBIA	61	480	8	MIA PaCa2	Control	1	6_5	Rep1_6_5	292.74	1.0273	1.03614
NFKBIA	62	490	8.16667	MIA PaCa2	Control	1	6_5	Rep1_6_5	296.009	1.04524	1.03551
NFKBIA	63	500	8.33333	MIA PaCa2	Control	1	6_5	Rep1_6_5	294.951	1.035	1.03236
NFKBIA	64	510	8.5	MIA PaCa2	Control	1	6_5	Rep1_6_5	293.602	1.02744	1.03128
NFKBIA	65	520	8.66667	MIA PaCa2	Control	1	6_5	Rep1_6_5	297.956	1.04312	1.03113
NFKBIA	66	530	8.83333	MIA PaCa2	Control	1	6_5	Rep1_6_5	290.79	1.0176	1.03197
NFKBIA	67	540	9	MIA PaCa2	Control	1	6_5	Rep1_6_5	293.612	1.02323	1.03084
NFKBIA	68	550	9.16667	MIA PaCa2	Control	1	6_5	Rep1_6_5	293.41	1.02629	1.03308
NFKBIA	69	560	9.33333	MIA PaCa2	Control	1	6_5	Rep1_6_5	299.678	1.05109	1.03144
NFKBIA	70	570	9.5	MIA PaCa2	Control	1	6_5	Rep1_6_5	293.744	1.02715	1.03197
NFKBIA	71	580	9.66667	MIA PaCa2	Control	1	6_5	Rep1_6_5	296.839	1.04311	1.03105
NFKBIA	72	590	9.83333	MIA PaCa2	Control	1	6_5	Rep1_6_5	299.158	1.03163	1.03262
NFKBIA	73	600	10	MIA PaCa2	Control	1	6_5	Rep1_6_5	295.355	1.0213	1.03073
NFKBIA	74	610	10.1667	MIA PaCa2	Control	1	6_5	Rep1_6_5	297.518	1.01677	1.03521
NFKBIA	75	620	10.3333	MIA PaCa2	Control	1	6_5	Rep1_6_5	300.787	1.03731	1.03381
NFKBIA	76	630	10.5	MIA PaCa2	Control	1	6_5	Rep1_6_5	301.672	1.03783	1.03407
NFKBIA	77	640	10.6667	MIA PaCa2	Control	1	6_5	Rep1_6_5	305.741	1.05852	1.03561
NFKBIA	78	650	10.8333	MIA PaCa2	Control	1	6_5	Rep1_6_5	299.387	1.0333	1.04032
NFKBIA	79	660	11	MIA PaCa2	Control	1	6_5	Rep1_6_5	299.013	1.03348	1.03976
NFKBIA	80	670	11.1667	MIA PaCa2	Control	1	6_5	Rep1_6_5	297.694	1.03209	1.03793
NFKBIA	81	680	11.3333	MIA PaCa2	Control	1	6_5	Rep1_6_5	304.144	1.0497	1.03778
NFKBIA	82	690	11.5	MIA PaCa2	Control	1	6_5	Rep1_6_5	299.411	1.0334	1.03951
NFKBIA	83	700	11.6667	MIA PaCa2	Control	1	6_5	Rep1_6_5	295.921	1.025	1.03777
NFKBIA	84	710	11.8333	MIA PaCa2	Control	1	6_5	Rep1_6_5	303.167	1.05752	1.03717
NFKBIA	85	720	12	MIA PaCa2	Control	1	6_5	Rep1_6_5	301.239	1.04541	1.03657
NFKBIA	86	730	12.1667	MIA PaCa2	Control	1	6_5	Rep1_6_5	297.023	1.0213	1.03597
NFKBIA	1	-120	-2	MIA PaCa2	TNF	1	6_9	Rep1_6_9	322.507	1.04302	1.06109
NFKBIA	2	-110	-1.83333	MIA PaCa2	TNF	1	6_9	Rep1_6_9	323.009	1.07452	1.06458
NFKBIA	3	-100	-1.66667	MIA PaCa2	TNF	1	6_9	Rep1_6_9	321.197	1.07092	1.06807
NFKBIA	4	-90	-1.5	MIA PaCa2	TNF	1	6_9	Rep1_6_9	319.494	1.08874	1.07156
NFKBIA	5	-80	-1.33333	MIA PaCa2	TNF	1	6_9	Rep1_6_9	315.82	1.07219	1.07339
NFKBIA	6	-70	-1.16667	MIA PaCa2	TNF	1	6_9	Rep1_6_9	313.16	1.08	1.07345
NFKBIA	7	-60	-1	MIA PaCa2	TNF	1	6_9	Rep1_6_9	312.454	1.07152	1.07256
NFKBIA	8	-50	-0.833333	MIA PaCa2	TNF	1	6_9	Rep1_6_9	304.498	1.05581	1.06894
NFKBIA	9	-40	-0.666667	MIA PaCa2	TNF	1	6_9	Rep1_6_9	308.659	1.07499	1.06931
NFKBIA	10	-30	-0.5	MIA PaCa2	TNF	1	6_9	Rep1_6_9	303.212	1.06468	1.06826
NFKBIA	11	-20	-0.333333	MIA PaCa2	TNF	1	6_9	Rep1_6_9	304.274	1.06338	1.13481
NFKBIA	12	-10	-0.166667	MIA PaCa2	TNF	1	6_9	Rep1_6_9	304.912	1.07476	1.21453
NFKBIA	13	0	0	MIA PaCa2	TNF	1	6_9	Rep1_6_9	303.884	1.07269	1.29198
NFKBIA	14	10	0.166667	MIA PaCa2	TNF	1	6_9	Rep1_6_9	427.378	1.53731	1.36829
NFKBIA	15	20	0.333333	MIA PaCa2	TNF	1	6_9	Rep1_6_9	454.756	1.61391	1.44753
NFKBIA	16	30	0.5	MIA PaCa2	TNF	1	6_9	Rep1_6_9	452.198	1.61709	1.52597
NFKBIA	17	40	0.666667	MIA PaCa2	TNF	1	6_9	Rep1_6_9	447.737	1.59887	1.60442
NFKBIA	18	50	0.833333	MIA PaCa2	TNF	1	6_9	Rep1_6_9	449.619	1.61806	1.6147
NFKBIA	19	60	1	MIA PaCa2	TNF	1	6_9	Rep1_6_9	451.29	1.62385	1.6126
NFKBIA	20	70	1.16667	MIA PaCa2	TNF	1	6_9	Rep1_6_9	448.322	1.62183	1.61181
NFKBIA	21	80	1.33333	MIA PaCa2	TNF	1	6_9	Rep1_6_9	445.046	1.60929	1.61526
NFKBIA	22	90	1.5	MIA PaCa2	TNF	1	6_9	Rep1_6_9	446.459	1.59921	1.61323
NFKBIA	23	100	1.66667	MIA PaCa2	TNF	1	6_9	Rep1_6_9	444.418	1.61156	1.60912
NFKBIA	24	110	1.83333	MIA PaCa2	TNF	1	6_9	Rep1_6_9	450.267	1.62303	1.60628
NFKBIA	25	120	2	MIA PaCa2	TNF	1	6_9	Rep1_6_9	445.616	1.60387	1.60518
NFKBIA	26	130	2.16667	MIA PaCa2	TNF	1	6_9	Rep1_6_9	442.394	1.59506	1.60315
NFKBIA	27	140	2.33333	MIA PaCa2	TNF	1	6_9	Rep1_6_9	443.898	1.60195	1.60065
NFKBIA	28	150	2.5	MIA PaCa2	TNF	1	6_9	Rep1_6_9	441.798	1.60158	1.59469
NFKBIA	29	160	2.66667	MIA PaCa2	TNF	1	6_9	Rep1_6_9	438.002	1.58504	1.59067
NFKBIA	30	170	2.83333	MIA PaCa2	TNF	1	6_9	Rep1_6_9	439.139	1.59405	1.58985
NFKBIA	31	180	3	MIA PaCa2	TNF	1	6_9	Rep1_6_9	437.67	1.58129	1.58493
NFKBIA	32	190	3.16667	MIA PaCa2	TNF	1	6_9	Rep1_6_9	436.918	1.57573	1.58049
NFKBIA	33	200	3.33333	MIA PaCa2	TNF	1	6_9	Rep1_6_9	440.088	1.58931	1.58059
NFKBIA	34	210	3.5	MIA PaCa2	TNF	1	6_9	Rep1_6_9	435.828	1.56752	1.57965
NFKBIA	35	220	3.66667	MIA PaCa2	TNF	1	6_9	Rep1_6_9	433.725	1.57047	1.57702
NFKBIA	36	230	3.83333	MIA PaCa2	TNF	1	6_9	Rep1_6_9	436.187	1.58575	1.57466
NFKBIA	37	240	4	MIA PaCa2	TNF	1	6_9	Rep1_6_9	434.797	1.58749	1.56928
NFKBIA	38	250	4.16667	MIA PaCa2	TNF	1	6_9	Rep1_6_9	436.147	1.56286	1.56543
NFKBIA	39	260	4.33333	MIA PaCa2	TNF	1	6_9	Rep1_6_9	432.977	1.5592	1.56147
NFKBIA	40	270	4.5	MIA PaCa2	TNF	1	6_9	Rep1_6_9	429.797	1.55165	1.5558
NFKBIA	41	280	4.66667	MIA PaCa2	TNF	1	6_9	Rep1_6_9	427.316	1.54059	1.54663
NFKBIA	42	290	4.83333	MIA PaCa2	TNF	1	6_9	Rep1_6_9	425.367	1.54273	1.54135
NFKBIA	43	300	5	MIA PaCa2	TNF	1	6_9	Rep1_6_9	425.049	1.54609	1.53385
NFKBIA	44	310	5.16667	MIA PaCa2	TNF	1	6_9	Rep1_6_9	424.303	1.52333	1.52804
NFKBIA	45	320	5.33333	MIA PaCa2	TNF	1	6_9	Rep1_6_9	419.682	1.52586	1.52025
NFKBIA	46	330	5.5	MIA PaCa2	TNF	1	6_9	Rep1_6_9	420.592	1.50673	1.51043
NFKBIA	47	340	5.66667	MIA PaCa2	TNF	1	6_9	Rep1_6_9	418.85	1.51098	1.5002
NFKBIA	48	350	5.83333	MIA PaCa2	TNF	1	6_9	Rep1_6_9	415.638	1.48605	1.48956
NFKBIA	49	360	6	MIA PaCa2	TNF	1	6_9	Rep1_6_9	408.58	1.47395	1.47881
NFKBIA	50	370	6.16667	MIA PaCa2	TNF	1	6_9	Rep1_6_9	412.43	1.47448	1.46789
NFKBIA	51	380	6.33333	MIA PaCa2	TNF	1	6_9	Rep1_6_9	406.462	1.44886	1.45421
NFKBIA	52	390	6.5	MIA PaCa2	TNF	1	6_9	Rep1_6_9	410.894	1.45061	1.44542
NFKBIA	53	400	6.66667	MIA PaCa2	TNF	1	6_9	Rep1_6_9	405.842	1.43031	1.43493
NFKBIA	54	410	6.83333	MIA PaCa2	TNF	1	6_9	Rep1_6_9	403.648	1.41519	1.42483
NFKBIA	55	420	7	MIA PaCa2	TNF	1	6_9	Rep1_6_9	401.184	1.4245	1.4181
NFKBIA	56	430	7.16667	MIA PaCa2	TNF	1	6_9	Rep1_6_9	397.506	1.40053	1.40939
NFKBIA	57	440	7.33333	MIA PaCa2	TNF	1	6_9	Rep1_6_9	398.602	1.40379	1.40028
NFKBIA	58	450	7.5	MIA PaCa2	TNF	1	6_9	Rep1_6_9	397.256	1.40176	1.39477
NFKBIA	59	460	7.66667	MIA PaCa2	TNF	1	6_9	Rep1_6_9	393.103	1.38965	1.39072
NFKBIA	60	470	7.83333	MIA PaCa2	TNF	1	6_9	Rep1_6_9	388.997	1.36651	1.38364
NFKBIA	61	480	8	MIA PaCa2	TNF	1	6_9	Rep1_6_9	392.299	1.37667	1.37829
NFKBIA	62	490	8.16667	MIA PaCa2	TNF	1	6_9	Rep1_6_9	395.378	1.39613	1.37224
NFKBIA	63	500	8.33333	MIA PaCa2	TNF	1	6_9	Rep1_6_9	384.991	1.35095	1.36634
NFKBIA	64	510	8.5	MIA PaCa2	TNF	1	6_9	Rep1_6_9	390.454	1.36636	1.36201
NFKBIA	65	520	8.66667	MIA PaCa2	TNF	1	6_9	Rep1_6_9	388.302	1.35942	1.35704
NFKBIA	66	530	8.83333	MIA PaCa2	TNF	1	6_9	Rep1_6_9	385.292	1.34831	1.34708
NFKBIA	67	540	9	MIA PaCa2	TNF	1	6_9	Rep1_6_9	383.428	1.33623	1.34318
NFKBIA	68	550	9.16667	MIA PaCa2	TNF	1	6_9	Rep1_6_9	383.633	1.34187	1.33628
NFKBIA	69	560	9.33333	MIA PaCa2	TNF	1	6_9	Rep1_6_9	378.167	1.32639	1.32861
NFKBIA	70	570	9.5	MIA PaCa2	TNF	1	6_9	Rep1_6_9	378.54	1.32365	1.31889
NFKBIA	71	580	9.66667	MIA PaCa2	TNF	1	6_9	Rep1_6_9	375.085	1.31806	1.30934
NFKBIA	72	590	9.83333	MIA PaCa2	TNF	1	6_9	Rep1_6_9	378.656	1.30577	1.29939
NFKBIA	73	600	10	MIA PaCa2	TNF	1	6_9	Rep1_6_9	370.242	1.28025	1.29457
NFKBIA	74	610	10.1667	MIA PaCa2	TNF	1	6_9	Rep1_6_9	371.433	1.26937	1.2896
NFKBIA	75	620	10.3333	MIA PaCa2	TNF	1	6_9	Rep1_6_9	368.915	1.27226	1.27997
NFKBIA	76	630	10.5	MIA PaCa2	TNF	1	6_9	Rep1_6_9	375.737	1.29264	1.27172
NFKBIA	77	640	10.6667	MIA PaCa2	TNF	1	6_9	Rep1_6_9	372.278	1.28888	1.27129
NFKBIA	78	650	10.8333	MIA PaCa2	TNF	1	6_9	Rep1_6_9	362.356	1.25063	1.26936
NFKBIA	79	660	11	MIA PaCa2	TNF	1	6_9	Rep1_6_9	361.087	1.24802	1.26344
NFKBIA	80	670	11.1667	MIA PaCa2	TNF	1	6_9	Rep1_6_9	368.403	1.27723	1.2595
NFKBIA	81	680	11.3333	MIA PaCa2	TNF	1	6_9	Rep1_6_9	363.867	1.25583	1.25471
NFKBIA	82	690	11.5	MIA PaCa2	TNF	1	6_9	Rep1_6_9	356.63	1.23088	1.25563
NFKBIA	83	700	11.6667	MIA PaCa2	TNF	1	6_9	Rep1_6_9	365.206	1.26499	1.24995
NFKBIA	84	710	11.8333	MIA PaCa2	TNF	1	6_9	Rep1_6_9	359.896	1.2554	1.24353
NFKBIA	85	720	12	MIA PaCa2	TNF	1	6_9	Rep1_6_9	362.222	1.25704	1.2371
NFKBIA	86	730	12.1667	MIA PaCa2	TNF	1	6_9	Rep1_6_9	351.403	1.20829	1.23068
NFKBIB	1	-120	-2	MIA PaCa2	TNF	1	7_10	Rep1_7_10	323.12	1.045	1.03418
NFKBIB	2	-110	-1.83333	MIA PaCa2	TNF	1	7_10	Rep1_7_10	309.366	1.02913	1.03316
NFKBIB	3	-100	-1.66667	MIA PaCa2	TNF	1	7_10	Rep1_7_10	308.323	1.028	1.03213
NFKBIB	4	-90	-1.5	MIA PaCa2	TNF	1	7_10	Rep1_7_10	301.299	1.02673	1.03111
NFKBIB	5	-80	-1.33333	MIA PaCa2	TNF	1	7_10	Rep1_7_10	300.097	1.01881	1.02982
NFKBIB	6	-70	-1.16667	MIA PaCa2	TNF	1	7_10	Rep1_7_10	300.552	1.03652	1.02822
NFKBIB	7	-60	-1	MIA PaCa2	TNF	1	7_10	Rep1_7_10	301.392	1.03359	1.02688
NFKBIB	8	-50	-0.833333	MIA PaCa2	TNF	1	7_10	Rep1_7_10	298.768	1.03594	1.02515
NFKBIB	9	-40	-0.666667	MIA PaCa2	TNF	1	7_10	Rep1_7_10	292.271	1.01792	1.02657
NFKBIB	10	-30	-0.5	MIA PaCa2	TNF	1	7_10	Rep1_7_10	290.108	1.01867	1.02707
NFKBIB	11	-20	-0.333333	MIA PaCa2	TNF	1	7_10	Rep1_7_10	290.315	1.0146	1.11082
NFKBIB	12	-10	-0.166667	MIA PaCa2	TNF	1	7_10	Rep1_7_10	291.869	1.02879	1.19377
NFKBIB	13	0	0	MIA PaCa2	TNF	1	7_10	Rep1_7_10	294.629	1.04002	1.28082
NFKBIB	14	10	0.166667	MIA PaCa2	TNF	1	7_10	Rep1_7_10	450.311	1.6198	1.36742
NFKBIB	15	20	0.333333	MIA PaCa2	TNF	1	7_10	Rep1_7_10	455.516	1.61661	1.45588
NFKBIB	16	30	0.5	MIA PaCa2	TNF	1	7_10	Rep1_7_10	455.044	1.62727	1.54014
NFKBIB	17	40	0.666667	MIA PaCa2	TNF	1	7_10	Rep1_7_10	455.016	1.62486	1.62207
NFKBIB	18	50	0.833333	MIA PaCa2	TNF	1	7_10	Rep1_7_10	453.993	1.6338	1.62233
NFKBIB	19	60	1	MIA PaCa2	TNF	1	7_10	Rep1_7_10	449.838	1.61863	1.61943
NFKBIB	20	70	1.16667	MIA PaCa2	TNF	1	7_10	Rep1_7_10	446.016	1.61349	1.61738
NFKBIB	21	80	1.33333	MIA PaCa2	TNF	1	7_10	Rep1_7_10	448.474	1.62168	1.61541
NFKBIB	22	90	1.5	MIA PaCa2	TNF	1	7_10	Rep1_7_10	445.639	1.59627	1.60868
NFKBIB	23	100	1.66667	MIA PaCa2	TNF	1	7_10	Rep1_7_10	444.798	1.61294	1.60694
NFKBIB	24	110	1.83333	MIA PaCa2	TNF	1	7_10	Rep1_7_10	446.953	1.61109	1.60555
NFKBIB	25	120	2	MIA PaCa2	TNF	1	7_10	Rep1_7_10	440.838	1.58667	1.6019
NFKBIB	26	130	2.16667	MIA PaCa2	TNF	1	7_10	Rep1_7_10	445.551	1.60644	1.60196
NFKBIB	27	140	2.33333	MIA PaCa2	TNF	1	7_10	Rep1_7_10	444.398	1.60375	1.59672
NFKBIB	28	150	2.5	MIA PaCa2	TNF	1	7_10	Rep1_7_10	440.294	1.59612	1.59057
NFKBIB	29	160	2.66667	MIA PaCa2	TNF	1	7_10	Rep1_7_10	441.233	1.59673	1.58826
NFKBIB	30	170	2.83333	MIA PaCa2	TNF	1	7_10	Rep1_7_10	434.229	1.57622	1.58418
NFKBIB	31	180	3	MIA PaCa2	TNF	1	7_10	Rep1_7_10	434.005	1.56805	1.57954
NFKBIB	32	190	3.16667	MIA PaCa2	TNF	1	7_10	Rep1_7_10	435.456	1.57046	1.57398
NFKBIB	33	200	3.33333	MIA PaCa2	TNF	1	7_10	Rep1_7_10	436.93	1.57791	1.57271
NFKBIB	34	210	3.5	MIA PaCa2	TNF	1	7_10	Rep1_7_10	436.871	1.57127	1.57424
NFKBIB	35	220	3.66667	MIA PaCa2	TNF	1	7_10	Rep1_7_10	430.063	1.55721	1.57258
NFKBIB	36	230	3.83333	MIA PaCa2	TNF	1	7_10	Rep1_7_10	436.756	1.58783	1.57185
NFKBIB	37	240	4	MIA PaCa2	TNF	1	7_10	Rep1_7_10	434.654	1.58697	1.57092
NFKBIB	38	250	4.16667	MIA PaCa2	TNF	1	7_10	Rep1_7_10	434.348	1.55641	1.57072
NFKBIB	39	260	4.33333	MIA PaCa2	TNF	1	7_10	Rep1_7_10	434.679	1.56533	1.57328
NFKBIB	40	270	4.5	MIA PaCa2	TNF	1	7_10	Rep1_7_10	435.271	1.57142	1.57111
NFKBIB	41	280	4.66667	MIA PaCa2	TNF	1	7_10	Rep1_7_10	435.448	1.5699	1.56935
NFKBIB	42	290	4.83333	MIA PaCa2	TNF	1	7_10	Rep1_7_10	434.296	1.57512	1.57409
NFKBIB	43	300	5	MIA PaCa2	TNF	1	7_10	Rep1_7_10	432.334	1.57259	1.58037
NFKBIB	44	310	5.16667	MIA PaCa2	TNF	1	7_10	Rep1_7_10	438.606	1.57468	1.58561
NFKBIB	45	320	5.33333	MIA PaCa2	TNF	1	7_10	Rep1_7_10	437.213	1.5896	1.59227
NFKBIB	46	330	5.5	MIA PaCa2	TNF	1	7_10	Rep1_7_10	449.221	1.60929	1.59208
NFKBIB	47	340	5.66667	MIA PaCa2	TNF	1	7_10	Rep1_7_10	445.767	1.60808	1.59058
NFKBIB	48	350	5.83333	MIA PaCa2	TNF	1	7_10	Rep1_7_10	452.143	1.61657	1.59093
NFKBIB	49	360	6	MIA PaCa2	TNF	1	7_10	Rep1_7_10	436.256	1.57379	1.58817
NFKBIB	50	370	6.16667	MIA PaCa2	TNF	1	7_10	Rep1_7_10	436.925	1.56206	1.58377
NFKBIB	51	380	6.33333	MIA PaCa2	TNF	1	7_10	Rep1_7_10	442.445	1.57712	1.578
NFKBIB	52	390	6.5	MIA PaCa2	TNF	1	7_10	Rep1_7_10	444.793	1.57029	1.57242
NFKBIB	53	400	6.66667	MIA PaCa2	TNF	1	7_10	Rep1_7_10	447.89	1.5785	1.56947
NFKBIB	54	410	6.83333	MIA PaCa2	TNF	1	7_10	Rep1_7_10	447.132	1.56765	1.57158
NFKBIB	55	420	7	MIA PaCa2	TNF	1	7_10	Rep1_7_10	444.271	1.57749	1.57002
NFKBIB	56	430	7.16667	MIA PaCa2	TNF	1	7_10	Rep1_7_10	440.831	1.55318	1.57297
NFKBIB	57	440	7.33333	MIA PaCa2	TNF	1	7_10	Rep1_7_10	447.736	1.57683	1.56852
NFKBIB	58	450	7.5	MIA PaCa2	TNF	1	7_10	Rep1_7_10	443.868	1.56624	1.56826
NFKBIB	59	460	7.66667	MIA PaCa2	TNF	1	7_10	Rep1_7_10	450.043	1.59094	1.57148
NFKBIB	60	470	7.83333	MIA PaCa2	TNF	1	7_10	Rep1_7_10	440.459	1.54729	1.57132
NFKBIB	61	480	8	MIA PaCa2	TNF	1	7_10	Rep1_7_10	446.221	1.5659	1.56595
NFKBIB	62	490	8.16667	MIA PaCa2	TNF	1	7_10	Rep1_7_10	453.104	1.59996	1.5613
NFKBIB	63	500	8.33333	MIA PaCa2	TNF	1	7_10	Rep1_7_10	442.317	1.55211	1.54645
NFKBIB	64	510	8.5	MIA PaCa2	TNF	1	7_10	Rep1_7_10	439.849	1.53921	1.54531
NFKBIB	65	520	8.66667	MIA PaCa2	TNF	1	7_10	Rep1_7_10	438.08	1.53369	1.54172
NFKBIB	66	530	8.83333	MIA PaCa2	TNF	1	7_10	Rep1_7_10	424.918	1.48697	1.52756
NFKBIB	67	540	9	MIA PaCa2	TNF	1	7_10	Rep1_7_10	441.707	1.53933	1.51824
NFKBIB	68	550	9.16667	MIA PaCa2	TNF	1	7_10	Rep1_7_10	440.494	1.54076	1.5177
NFKBIB	69	560	9.33333	MIA PaCa2	TNF	1	7_10	Rep1_7_10	427.912	1.50086	1.51241
NFKBIB	70	570	9.5	MIA PaCa2	TNF	1	7_10	Rep1_7_10	425.214	1.48686	1.51363
NFKBIB	71	580	9.66667	MIA PaCa2	TNF	1	7_10	Rep1_7_10	436.932	1.5354	1.50528
NFKBIB	72	590	9.83333	MIA PaCa2	TNF	1	7_10	Rep1_7_10	434.017	1.49668	1.48804
NFKBIB	73	600	10	MIA PaCa2	TNF	1	7_10	Rep1_7_10	432.501	1.49554	1.48318
NFKBIB	74	610	10.1667	MIA PaCa2	TNF	1	7_10	Rep1_7_10	433.307	1.48083	1.47799
NFKBIB	75	620	10.3333	MIA PaCa2	TNF	1	7_10	Rep1_7_10	411.796	1.42014	1.46321
NFKBIB	76	630	10.5	MIA PaCa2	TNF	1	7_10	Rep1_7_10	426.356	1.46678	1.45612
NFKBIB	77	640	10.6667	MIA PaCa2	TNF	1	7_10	Rep1_7_10	418.975	1.45055	1.44692
NFKBIB	78	650	10.8333	MIA PaCa2	TNF	1	7_10	Rep1_7_10	414.894	1.43196	1.4407
NFKBIB	79	660	11	MIA PaCa2	TNF	1	7_10	Rep1_7_10	418.674	1.44706	1.44327
NFKBIB	80	670	11.1667	MIA PaCa2	TNF	1	7_10	Rep1_7_10	412.791	1.43112	1.43975
NFKBIB	81	680	11.3333	MIA PaCa2	TNF	1	7_10	Rep1_7_10	416.45	1.43731	1.4375
NFKBIB	82	690	11.5	MIA PaCa2	TNF	1	7_10	Rep1_7_10	416.669	1.4381	1.43788
NFKBIB	83	700	11.6667	MIA PaCa2	TNF	1	7_10	Rep1_7_10	416.352	1.44215	1.4319
NFKBIB	84	710	11.8333	MIA PaCa2	TNF	1	7_10	Rep1_7_10	411.329	1.43481	1.42881
NFKBIB	85	720	12	MIA PaCa2	TNF	1	7_10	Rep1_7_10	413.387	1.4346	1.42572
NFKBIB	86	730	12.1667	MIA PaCa2	TNF	1	7_10	Rep1_7_10	408.664	1.40518	1.42262
NFKBIB	1	-120	-2	MIA PaCa2	TNF	1	7_11	Rep1_7_11	317.419	1.02656	1.02829
NFKBIB	2	-110	-1.83333	MIA PaCa2	TNF	1	7_11	Rep1_7_11	312.027	1.03798	1.02448
NFKBIB	3	-100	-1.66667	MIA PaCa2	TNF	1	7_11	Rep1_7_11	306.287	1.02121	1.02067
NFKBIB	4	-90	-1.5	MIA PaCa2	TNF	1	7_11	Rep1_7_11	290.895	0.991282	1.01685
NFKBIB	5	-80	-1.33333	MIA PaCa2	TNF	1	7_11	Rep1_7_11	298.999	1.01509	1.0166
NFKBIB	6	-70	-1.16667	MIA PaCa2	TNF	1	7_11	Rep1_7_11	296.498	1.02253	1.01404
NFKBIB	7	-60	-1	MIA PaCa2	TNF	1	7_11	Rep1_7_11	292.565	1.00332	1.01504
NFKBIB	8	-50	-0.833333	MIA PaCa2	TNF	1	7_11	Rep1_7_11	295.54	1.02475	1.01957
NFKBIB	9	-40	-0.666667	MIA PaCa2	TNF	1	7_11	Rep1_7_11	292.897	1.0201	1.02353
NFKBIB	10	-30	-0.5	MIA PaCa2	TNF	1	7_11	Rep1_7_11	292.833	1.02824	1.02749
NFKBIB	11	-20	-0.333333	MIA PaCa2	TNF	1	7_11	Rep1_7_11	292.712	1.02297	1.11686
NFKBIB	12	-10	-0.166667	MIA PaCa2	TNF	1	7_11	Rep1_7_11	295.843	1.0428	1.20207
NFKBIB	13	0	0	MIA PaCa2	TNF	1	7_11	Rep1_7_11	297.531	1.05027	1.28926
NFKBIB	14	10	0.166667	MIA PaCa2	TNF	1	7_11	Rep1_7_11	452.835	1.62888	1.37352
NFKBIB	15	20	0.333333	MIA PaCa2	TNF	1	7_11	Rep1_7_11	456.819	1.62123	1.45716
NFKBIB	16	30	0.5	MIA PaCa2	TNF	1	7_11	Rep1_7_11	455.934	1.63045	1.5387
NFKBIB	17	40	0.666667	MIA PaCa2	TNF	1	7_11	Rep1_7_11	453.104	1.61803	1.61562
NFKBIB	18	50	0.833333	MIA PaCa2	TNF	1	7_11	Rep1_7_11	446.956	1.60848	1.61262
NFKBIB	19	60	1	MIA PaCa2	TNF	1	7_11	Rep1_7_11	448.43	1.61356	1.60332
NFKBIB	20	70	1.16667	MIA PaCa2	TNF	1	7_11	Rep1_7_11	439.17	1.58872	1.59885
NFKBIB	21	80	1.33333	MIA PaCa2	TNF	1	7_11	Rep1_7_11	444.649	1.60785	1.59518
NFKBIB	22	90	1.5	MIA PaCa2	TNF	1	7_11	Rep1_7_11	434.432	1.55612	1.59236
NFKBIB	23	100	1.66667	MIA PaCa2	TNF	1	7_11	Rep1_7_11	440.995	1.59915	1.58925
NFKBIB	24	110	1.83333	MIA PaCa2	TNF	1	7_11	Rep1_7_11	441.762	1.59238	1.58894
NFKBIB	25	120	2	MIA PaCa2	TNF	1	7_11	Rep1_7_11	441.418	1.58876	1.58754
NFKBIB	26	130	2.16667	MIA PaCa2	TNF	1	7_11	Rep1_7_11	441.484	1.59178	1.59305
NFKBIB	27	140	2.33333	MIA PaCa2	TNF	1	7_11	Rep1_7_11	439.631	1.58655	1.59233
NFKBIB	28	150	2.5	MIA PaCa2	TNF	1	7_11	Rep1_7_11	440.821	1.59803	1.59121
NFKBIB	29	160	2.66667	MIA PaCa2	TNF	1	7_11	Rep1_7_11	440.669	1.59469	1.58741
NFKBIB	30	170	2.83333	MIA PaCa2	TNF	1	7_11	Rep1_7_11	439.166	1.59415	1.584
NFKBIB	31	180	3	MIA PaCa2	TNF	1	7_11	Rep1_7_11	438.558	1.5845	1.57943
NFKBIB	32	190	3.16667	MIA PaCa2	TNF	1	7_11	Rep1_7_11	433.156	1.56217	1.5746
NFKBIB	33	200	3.33333	MIA PaCa2	TNF	1	7_11	Rep1_7_11	434.157	1.56789	1.57042
NFKBIB	34	210	3.5	MIA PaCa2	TNF	1	7_11	Rep1_7_11	432.237	1.55461	1.56782
NFKBIB	35	220	3.66667	MIA PaCa2	TNF	1	7_11	Rep1_7_11	431.991	1.56419	1.56288
NFKBIB	36	230	3.83333	MIA PaCa2	TNF	1	7_11	Rep1_7_11	430.604	1.56546	1.55717
NFKBIB	37	240	4	MIA PaCa2	TNF	1	7_11	Rep1_7_11	431.631	1.57594	1.55371
NFKBIB	38	250	4.16667	MIA PaCa2	TNF	1	7_11	Rep1_7_11	432.524	1.54988	1.55171
NFKBIB	39	260	4.33333	MIA PaCa2	TNF	1	7_11	Rep1_7_11	422.719	1.52226	1.54884
NFKBIB	40	270	4.5	MIA PaCa2	TNF	1	7_11	Rep1_7_11	427.576	1.54364	1.54707
NFKBIB	41	280	4.66667	MIA PaCa2	TNF	1	7_11	Rep1_7_11	427.321	1.54061	1.54024
NFKBIB	42	290	4.83333	MIA PaCa2	TNF	1	7_11	Rep1_7_11	425.746	1.5441	1.53902
NFKBIB	43	300	5	MIA PaCa2	TNF	1	7_11	Rep1_7_11	426.967	1.55307	1.54147
NFKBIB	44	310	5.16667	MIA PaCa2	TNF	1	7_11	Rep1_7_11	425.645	1.52815	1.54243
NFKBIB	45	320	5.33333	MIA PaCa2	TNF	1	7_11	Rep1_7_11	423.938	1.54134	1.54003
NFKBIB	46	330	5.5	MIA PaCa2	TNF	1	7_11	Rep1_7_11	429.717	1.53942	1.54162
NFKBIB	47	340	5.66667	MIA PaCa2	TNF	1	7_11	Rep1_7_11	429.764	1.55035	1.54023
NFKBIB	48	350	5.83333	MIA PaCa2	TNF	1	7_11	Rep1_7_11	426.188	1.52377	1.54214
NFKBIB	49	360	6	MIA PaCa2	TNF	1	7_11	Rep1_7_11	431.117	1.55525	1.53883
NFKBIB	50	370	6.16667	MIA PaCa2	TNF	1	7_11	Rep1_7_11	431.68	1.54331	1.53708
NFKBIB	51	380	6.33333	MIA PaCa2	TNF	1	7_11	Rep1_7_11	432.467	1.54156	1.53418
NFKBIB	52	390	6.5	MIA PaCa2	TNF	1	7_11	Rep1_7_11	430.02	1.51814	1.53813
NFKBIB	53	400	6.66667	MIA PaCa2	TNF	1	7_11	Rep1_7_11	433.327	1.52717	1.53472
NFKBIB	54	410	6.83333	MIA PaCa2	TNF	1	7_11	Rep1_7_11	436.415	1.53008	1.53565
NFKBIB	55	420	7	MIA PaCa2	TNF	1	7_11	Rep1_7_11	436.925	1.55141	1.53502
NFKBIB	56	430	7.16667	MIA PaCa2	TNF	1	7_11	Rep1_7_11	434.645	1.53138	1.53727
NFKBIB	57	440	7.33333	MIA PaCa2	TNF	1	7_11	Rep1_7_11	440.065	1.54981	1.53712
NFKBIB	58	450	7.5	MIA PaCa2	TNF	1	7_11	Rep1_7_11	435.63	1.53717	1.53766
NFKBIB	59	460	7.66667	MIA PaCa2	TNF	1	7_11	Rep1_7_11	433.9	1.53387	1.53053
NFKBIB	60	470	7.83333	MIA PaCa2	TNF	1	7_11	Rep1_7_11	434.433	1.52612	1.52425
NFKBIB	61	480	8	MIA PaCa2	TNF	1	7_11	Rep1_7_11	437.081	1.53382	1.51508
NFKBIB	62	490	8.16667	MIA PaCa2	TNF	1	7_11	Rep1_7_11	425.224	1.50152	1.5067
NFKBIB	63	500	8.33333	MIA PaCa2	TNF	1	7_11	Rep1_7_11	423.886	1.48744	1.50017
NFKBIB	64	510	8.5	MIA PaCa2	TNF	1	7_11	Rep1_7_11	424.528	1.4856	1.48665
NFKBIB	65	520	8.66667	MIA PaCa2	TNF	1	7_11	Rep1_7_11	422.333	1.47856	1.47309
NFKBIB	66	530	8.83333	MIA PaCa2	TNF	1	7_11	Rep1_7_11	425.246	1.48812	1.46439
NFKBIB	67	540	9	MIA PaCa2	TNF	1	7_11	Rep1_7_11	410.758	1.43148	1.45575
NFKBIB	68	550	9.16667	MIA PaCa2	TNF	1	7_11	Rep1_7_11	411.383	1.43893	1.44925
NFKBIB	69	560	9.33333	MIA PaCa2	TNF	1	7_11	Rep1_7_11	410.719	1.44056	1.43716
NFKBIB	70	570	9.5	MIA PaCa2	TNF	1	7_11	Rep1_7_11	408.097	1.42701	1.42383
NFKBIB	71	580	9.66667	MIA PaCa2	TNF	1	7_11	Rep1_7_11	409.811	1.44009	1.41501
NFKBIB	72	590	9.83333	MIA PaCa2	TNF	1	7_11	Rep1_7_11	404.216	1.39391	1.40683
NFKBIB	73	600	10	MIA PaCa2	TNF	1	7_11	Rep1_7_11	403.373	1.39482	1.39399
NFKBIB	74	610	10.1667	MIA PaCa2	TNF	1	7_11	Rep1_7_11	400.811	1.36977	1.38201
NFKBIB	75	620	10.3333	MIA PaCa2	TNF	1	7_11	Rep1_7_11	400.627	1.38162	1.36718
NFKBIB	76	630	10.5	MIA PaCa2	TNF	1	7_11	Rep1_7_11	392.607	1.35067	1.36059
NFKBIB	77	640	10.6667	MIA PaCa2	TNF	1	7_11	Rep1_7_11	387.973	1.34321	1.3555
NFKBIB	78	650	10.8333	MIA PaCa2	TNF	1	7_11	Rep1_7_11	387.167	1.33627	1.35401
NFKBIB	79	660	11	MIA PaCa2	TNF	1	7_11	Rep1_7_11	389.954	1.3478	1.3506
NFKBIB	80	670	11.1667	MIA PaCa2	TNF	1	7_11	Rep1_7_11	392.034	1.35916	1.35356
NFKBIB	81	680	11.3333	MIA PaCa2	TNF	1	7_11	Rep1_7_11	393.861	1.35935	1.35318
NFKBIB	82	690	11.5	MIA PaCa2	TNF	1	7_11	Rep1_7_11	393.392	1.35777	1.3556
NFKBIB	83	700	11.6667	MIA PaCa2	TNF	1	7_11	Rep1_7_11	395.914	1.37135	1.35531
NFKBIB	84	710	11.8333	MIA PaCa2	TNF	1	7_11	Rep1_7_11	384.319	1.34059	1.35283
NFKBIB	85	720	12	MIA PaCa2	TNF	1	7_11	Rep1_7_11	389.931	1.3532	1.35034
NFKBIB	86	730	12.1667	MIA PaCa2	TNF	1	7_11	Rep1_7_11	391.387	1.34577	1.34785
NFKBIB	1	-120	-2	MIA PaCa2	Control	1	7_3	Rep1_7_3	319.133	1.0321	1.02899
NFKBIB	2	-110	-1.83333	MIA PaCa2	Control	1	7_3	Rep1_7_3	307.128	1.02169	1.02715
NFKBIB	3	-100	-1.66667	MIA PaCa2	Control	1	7_3	Rep1_7_3	307.152	1.02409	1.02531
NFKBIB	4	-90	-1.5	MIA PaCa2	Control	1	7_3	Rep1_7_3	299.712	1.02133	1.02347
NFKBIB	5	-80	-1.33333	MIA PaCa2	Control	1	7_3	Rep1_7_3	302.473	1.02688	1.02427
NFKBIB	6	-70	-1.16667	MIA PaCa2	Control	1	7_3	Rep1_7_3	298.426	1.02918	1.02572
NFKBIB	7	-60	-1	MIA PaCa2	Control	1	7_3	Rep1_7_3	294.221	1.009	1.02879
NFKBIB	8	-50	-0.833333	MIA PaCa2	Control	1	7_3	Rep1_7_3	299.278	1.03771	1.029
NFKBIB	9	-40	-0.666667	MIA PaCa2	Control	1	7_3	Rep1_7_3	296.269	1.03184	1.03002
NFKBIB	10	-30	-0.5	MIA PaCa2	Control	1	7_3	Rep1_7_3	297.767	1.04556	1.03185
NFKBIB	11	-20	-0.333333	MIA PaCa2	Control	1	7_3	Rep1_7_3	292.668	1.02282	1.03999
NFKBIB	12	-10	-0.166667	MIA PaCa2	Control	1	7_3	Rep1_7_3	293.352	1.03402	1.04103
NFKBIB	13	0	0	MIA PaCa2	Control	1	7_3	Rep1_7_3	295.191	1.04201	1.04233
NFKBIB	14	10	0.166667	MIA PaCa2	Control	1	7_3	Rep1_7_3	296.341	1.06596	1.04076
NFKBIB	15	20	0.333333	MIA PaCa2	Control	1	7_3	Rep1_7_3	294.463	1.04503	1.04412
NFKBIB	16	30	0.5	MIA PaCa2	Control	1	7_3	Rep1_7_3	291.083	1.04093	1.04495
NFKBIB	17	40	0.666667	MIA PaCa2	Control	1	7_3	Rep1_7_3	289.714	1.03457	1.04434
NFKBIB	18	50	0.833333	MIA PaCa2	Control	1	7_3	Rep1_7_3	290.75	1.04634	1.04014
NFKBIB	19	60	1	MIA PaCa2	Control	1	7_3	Rep1_7_3	288.986	1.03984	1.03741
NFKBIB	20	70	1.16667	MIA PaCa2	Control	1	7_3	Rep1_7_3	286.853	1.03771	1.03926
NFKBIB	21	80	1.33333	MIA PaCa2	Control	1	7_3	Rep1_7_3	286.668	1.03659	1.03963
NFKBIB	22	90	1.5	MIA PaCa2	Control	1	7_3	Rep1_7_3	286.398	1.02587	1.0376
NFKBIB	23	100	1.66667	MIA PaCa2	Control	1	7_3	Rep1_7_3	290.639	1.05392	1.03464
NFKBIB	24	110	1.83333	MIA PaCa2	Control	1	7_3	Rep1_7_3	287.73	1.03715	1.03453
NFKBIB	25	120	2	MIA PaCa2	Control	1	7_3	Rep1_7_3	286.76	1.03211	1.03602
NFKBIB	26	130	2.16667	MIA PaCa2	Control	1	7_3	Rep1_7_3	282.652	1.01911	1.03761
NFKBIB	27	140	2.33333	MIA PaCa2	Control	1	7_3	Rep1_7_3	287.341	1.03696	1.03629
NFKBIB	28	150	2.5	MIA PaCa2	Control	1	7_3	Rep1_7_3	288.815	1.04699	1.03656
NFKBIB	29	160	2.66667	MIA PaCa2	Control	1	7_3	Rep1_7_3	286.571	1.03704	1.03703
NFKBIB	30	170	2.83333	MIA PaCa2	Control	1	7_3	Rep1_7_3	287.792	1.04467	1.0406
NFKBIB	31	180	3	MIA PaCa2	Control	1	7_3	Rep1_7_3	287.582	1.03903	1.03902
NFKBIB	32	190	3.16667	MIA PaCa2	Control	1	7_3	Rep1_7_3	287.102	1.03543	1.03833
NFKBIB	33	200	3.33333	MIA PaCa2	Control	1	7_3	Rep1_7_3	289.115	1.04409	1.03781
NFKBIB	34	210	3.5	MIA PaCa2	Control	1	7_3	Rep1_7_3	285.227	1.02586	1.03975
NFKBIB	35	220	3.66667	MIA PaCa2	Control	1	7_3	Rep1_7_3	287.828	1.0422	1.03761
NFKBIB	36	230	3.83333	MIA PaCa2	Control	1	7_3	Rep1_7_3	284.255	1.03341	1.03798
NFKBIB	37	240	4	MIA PaCa2	Control	1	7_3	Rep1_7_3	289.834	1.05822	1.03701
NFKBIB	38	250	4.16667	MIA PaCa2	Control	1	7_3	Rep1_7_3	285.784	1.02406	1.03828
NFKBIB	39	260	4.33333	MIA PaCa2	Control	1	7_3	Rep1_7_3	288.258	1.03805	1.03903
NFKBIB	40	270	4.5	MIA PaCa2	Control	1	7_3	Rep1_7_3	287.324	1.0373	1.04176
NFKBIB	41	280	4.66667	MIA PaCa2	Control	1	7_3	Rep1_7_3	286.997	1.0347	1.0377
NFKBIB	42	290	4.83333	MIA PaCa2	Control	1	7_3	Rep1_7_3	288.805	1.04745	1.04085
NFKBIB	43	300	5	MIA PaCa2	Control	1	7_3	Rep1_7_3	289.366	1.05255	1.0393
NFKBIB	44	310	5.16667	MIA PaCa2	Control	1	7_3	Rep1_7_3	286.836	1.0298	1.04127
NFKBIB	45	320	5.33333	MIA PaCa2	Control	1	7_3	Rep1_7_3	287.736	1.04614	1.04048
NFKBIB	46	330	5.5	MIA PaCa2	Control	1	7_3	Rep1_7_3	286.722	1.02715	1.03857
NFKBIB	47	340	5.66667	MIA PaCa2	Control	1	7_3	Rep1_7_3	291.377	1.05113	1.03476
NFKBIB	48	350	5.83333	MIA PaCa2	Control	1	7_3	Rep1_7_3	287.856	1.02918	1.03341
NFKBIB	49	360	6	MIA PaCa2	Control	1	7_3	Rep1_7_3	286.646	1.03407	1.03077
NFKBIB	50	370	6.16667	MIA PaCa2	Control	1	7_3	Rep1_7_3	286.946	1.02586	1.02958
NFKBIB	51	380	6.33333	MIA PaCa2	Control	1	7_3	Rep1_7_3	286.239	1.02032	1.02491
NFKBIB	52	390	6.5	MIA PaCa2	Control	1	7_3	Rep1_7_3	291.098	1.02769	1.02447
NFKBIB	53	400	6.66667	MIA PaCa2	Control	1	7_3	Rep1_7_3	289.088	1.01883	1.02306
NFKBIB	54	410	6.83333	MIA PaCa2	Control	1	7_3	Rep1_7_3	290.471	1.0184	1.02124
NFKBIB	55	420	7	MIA PaCa2	Control	1	7_3	Rep1_7_3	288.987	1.02612	1.02278
NFKBIB	56	430	7.16667	MIA PaCa2	Control	1	7_3	Rep1_7_3	290.688	1.02418	1.02426
NFKBIB	57	440	7.33333	MIA PaCa2	Control	1	7_3	Rep1_7_3	287.686	1.01317	1.0239
NFKBIB	58	450	7.5	MIA PaCa2	Control	1	7_3	Rep1_7_3	292.21	1.03109	1.02462
NFKBIB	59	460	7.66667	MIA PaCa2	Control	1	7_3	Rep1_7_3	293.632	1.03801	1.02376
NFKBIB	60	470	7.83333	MIA PaCa2	Control	1	7_3	Rep1_7_3	289.312	1.01632	1.02364
NFKBIB	61	480	8	MIA PaCa2	Control	1	7_3	Rep1_7_3	291.646	1.02346	1.02321
NFKBIB	62	490	8.16667	MIA PaCa2	Control	1	7_3	Rep1_7_3	288.881	1.02007	1.01946
NFKBIB	63	500	8.33333	MIA PaCa2	Control	1	7_3	Rep1_7_3	291.639	1.02337	1.01752
NFKBIB	64	510	8.5	MIA PaCa2	Control	1	7_3	Rep1_7_3	288.657	1.01013	1.01536
NFKBIB	65	520	8.66667	MIA PaCa2	Control	1	7_3	Rep1_7_3	287.029	1.00487	1.01188
NFKBIB	66	530	8.83333	MIA PaCa2	Control	1	7_3	Rep1_7_3	292.737	1.02442	1.01072
NFKBIB	67	540	9	MIA PaCa2	Control	1	7_3	Rep1_7_3	287.292	1.0012	1.00809
NFKBIB	68	550	9.16667	MIA PaCa2	Control	1	7_3	Rep1_7_3	285.637	0.999099	1.00895
NFKBIB	69	560	9.33333	MIA PaCa2	Control	1	7_3	Rep1_7_3	288.508	1.01192	1.00935
NFKBIB	70	570	9.5	MIA PaCa2	Control	1	7_3	Rep1_7_3	287.406	1.00498	1.00738
NFKBIB	71	580	9.66667	MIA PaCa2	Control	1	7_3	Rep1_7_3	289.165	1.01614	1.00762
NFKBIB	72	590	9.83333	MIA PaCa2	Control	1	7_3	Rep1_7_3	292.217	1.00769	1.00904
NFKBIB	73	600	10	MIA PaCa2	Control	1	7_3	Rep1_7_3	292.271	1.01064	1.00792
NFKBIB	74	610	10.1667	MIA PaCa2	Control	1	7_3	Rep1_7_3	293.444	1.00285	1.00987
NFKBIB	75	620	10.3333	MIA PaCa2	Control	1	7_3	Rep1_7_3	292.59	1.00904	1.01021
NFKBIB	76	630	10.5	MIA PaCa2	Control	1	7_3	Rep1_7_3	291.876	1.00413	1.0117
NFKBIB	77	640	10.6667	MIA PaCa2	Control	1	7_3	Rep1_7_3	294.22	1.01863	1.01314
NFKBIB	78	650	10.8333	MIA PaCa2	Control	1	7_3	Rep1_7_3	295.089	1.01847	1.01463
NFKBIB	79	660	11	MIA PaCa2	Control	1	7_3	Rep1_7_3	294.568	1.01811	1.01585
NFKBIB	80	670	11.1667	MIA PaCa2	Control	1	7_3	Rep1_7_3	294.434	1.02078	1.01581
NFKBIB	81	680	11.3333	MIA PaCa2	Control	1	7_3	Rep1_7_3	293.584	1.01326	1.01526
NFKBIB	82	690	11.5	MIA PaCa2	Control	1	7_3	Rep1_7_3	294.826	1.01757	1.01595
NFKBIB	83	700	11.6667	MIA PaCa2	Control	1	7_3	Rep1_7_3	289.805	1.00382	1.01558
NFKBIB	84	710	11.8333	MIA PaCa2	Control	1	7_3	Rep1_7_3	290.931	1.01483	1.01563
NFKBIB	85	720	12	MIA PaCa2	Control	1	7_3	Rep1_7_3	294.854	1.02325	1.01569
NFKBIB	86	730	12.1667	MIA PaCa2	Control	1	7_3	Rep1_7_3	295.348	1.01554	1.01574
NFKBIB	1	-120	-2	MIA PaCa2	Control	1	7_4	Rep1_7_4	316.564	1.0238	1.03192
NFKBIB	2	-110	-1.83333	MIA PaCa2	Control	1	7_4	Rep1_7_4	308.5	1.02625	1.03037
NFKBIB	3	-100	-1.66667	MIA PaCa2	Control	1	7_4	Rep1_7_4	310.9	1.03659	1.02882
NFKBIB	4	-90	-1.5	MIA PaCa2	Control	1	7_4	Rep1_7_4	305.254	1.04021	1.02727
NFKBIB	5	-80	-1.33333	MIA PaCa2	Control	1	7_4	Rep1_7_4	302.913	1.02837	1.0259
NFKBIB	6	-70	-1.16667	MIA PaCa2	Control	1	7_4	Rep1_7_4	295.247	1.01822	1.02653
NFKBIB	7	-60	-1	MIA PaCa2	Control	1	7_4	Rep1_7_4	296.675	1.01741	1.02839
NFKBIB	8	-50	-0.833333	MIA PaCa2	Control	1	7_4	Rep1_7_4	292.518	1.01427	1.02716
NFKBIB	9	-40	-0.666667	MIA PaCa2	Control	1	7_4	Rep1_7_4	295.912	1.0306	1.02976
NFKBIB	10	-30	-0.5	MIA PaCa2	Control	1	7_4	Rep1_7_4	298.937	1.04967	1.03386
NFKBIB	11	-20	-0.333333	MIA PaCa2	Control	1	7_4	Rep1_7_4	295.174	1.03158	1.04154
NFKBIB	12	-10	-0.166667	MIA PaCa2	Control	1	7_4	Rep1_7_4	296.922	1.0466	1.0444
NFKBIB	13	0	0	MIA PaCa2	Control	1	7_4	Rep1_7_4	296.566	1.04686	1.04325
NFKBIB	14	10	0.166667	MIA PaCa2	Control	1	7_4	Rep1_7_4	297.802	1.07121	1.04134
NFKBIB	15	20	0.333333	MIA PaCa2	Control	1	7_4	Rep1_7_4	291.423	1.03425	1.04279
NFKBIB	16	30	0.5	MIA PaCa2	Control	1	7_4	Rep1_7_4	285.944	1.02256	1.04088
NFKBIB	17	40	0.666667	MIA PaCa2	Control	1	7_4	Rep1_7_4	290.199	1.0363	1.04067
NFKBIB	18	50	0.833333	MIA PaCa2	Control	1	7_4	Rep1_7_4	289.467	1.04172	1.03646
NFKBIB	19	60	1	MIA PaCa2	Control	1	7_4	Rep1_7_4	287.161	1.03328	1.03623
NFKBIB	20	70	1.16667	MIA PaCa2	Control	1	7_4	Rep1_7_4	288.978	1.04539	1.03752
NFKBIB	21	80	1.33333	MIA PaCa2	Control	1	7_4	Rep1_7_4	288.081	1.0417	1.03662
NFKBIB	22	90	1.5	MIA PaCa2	Control	1	7_4	Rep1_7_4	288.302	1.03269	1.03675
NFKBIB	23	100	1.66667	MIA PaCa2	Control	1	7_4	Rep1_7_4	284.469	1.03155	1.03761
NFKBIB	24	110	1.83333	MIA PaCa2	Control	1	7_4	Rep1_7_4	285.745	1.02999	1.03637
NFKBIB	25	120	2	MIA PaCa2	Control	1	7_4	Rep1_7_4	289.694	1.04267	1.03709
NFKBIB	26	130	2.16667	MIA PaCa2	Control	1	7_4	Rep1_7_4	288.247	1.03928	1.03874
NFKBIB	27	140	2.33333	MIA PaCa2	Control	1	7_4	Rep1_7_4	287.266	1.03669	1.04105
NFKBIB	28	150	2.5	MIA PaCa2	Control	1	7_4	Rep1_7_4	288.746	1.04674	1.04471
NFKBIB	29	160	2.66667	MIA PaCa2	Control	1	7_4	Rep1_7_4	288.568	1.04427	1.04636
NFKBIB	30	170	2.83333	MIA PaCa2	Control	1	7_4	Rep1_7_4	288.623	1.04768	1.0484
NFKBIB	31	180	3	MIA PaCa2	Control	1	7_4	Rep1_7_4	292.185	1.05566	1.05006
NFKBIB	32	190	3.16667	MIA PaCa2	Control	1	7_4	Rep1_7_4	292.315	1.05423	1.05135
NFKBIB	33	200	3.33333	MIA PaCa2	Control	1	7_4	Rep1_7_4	291.732	1.05355	1.05061
NFKBIB	34	210	3.5	MIA PaCa2	Control	1	7_4	Rep1_7_4	291.468	1.04831	1.04863
NFKBIB	35	220	3.66667	MIA PaCa2	Control	1	7_4	Rep1_7_4	291.575	1.05576	1.04368
NFKBIB	36	230	3.83333	MIA PaCa2	Control	1	7_4	Rep1_7_4	285.806	1.03905	1.03926
NFKBIB	37	240	4	MIA PaCa2	Control	1	7_4	Rep1_7_4	283.171	1.03389	1.03523
NFKBIB	38	250	4.16667	MIA PaCa2	Control	1	7_4	Rep1_7_4	284.923	1.02097	1.03305
NFKBIB	39	260	4.33333	MIA PaCa2	Control	1	7_4	Rep1_7_4	284.158	1.02329	1.02983
NFKBIB	40	270	4.5	MIA PaCa2	Control	1	7_4	Rep1_7_4	284.019	1.02537	1.03148
NFKBIB	41	280	4.66667	MIA PaCa2	Control	1	7_4	Rep1_7_4	286.524	1.03299	1.03253
NFKBIB	42	290	4.83333	MIA PaCa2	Control	1	7_4	Rep1_7_4	284.893	1.03326	1.03745
NFKBIB	43	300	5	MIA PaCa2	Control	1	7_4	Rep1_7_4	288.825	1.05058	1.03638
NFKBIB	44	310	5.16667	MIA PaCa2	Control	1	7_4	Rep1_7_4	290.034	1.04128	1.03785
NFKBIB	45	320	5.33333	MIA PaCa2	Control	1	7_4	Rep1_7_4	290.275	1.05537	1.03812
NFKBIB	46	330	5.5	MIA PaCa2	Control	1	7_4	Rep1_7_4	283.554	1.0158	1.04073
NFKBIB	47	340	5.66667	MIA PaCa2	Control	1	7_4	Rep1_7_4	287.093	1.03567	1.03949
NFKBIB	48	350	5.83333	MIA PaCa2	Control	1	7_4	Rep1_7_4	289.458	1.03491	1.03955
NFKBIB	49	360	6	MIA PaCa2	Control	1	7_4	Rep1_7_4	291.477	1.0515	1.03464
NFKBIB	50	370	6.16667	MIA PaCa2	Control	1	7_4	Rep1_7_4	291.423	1.04187	1.03519
NFKBIB	51	380	6.33333	MIA PaCa2	Control	1	7_4	Rep1_7_4	292.25	1.04174	1.03164
NFKBIB	52	390	6.5	MIA PaCa2	Control	1	7_4	Rep1_7_4	289.189	1.02095	1.03169
NFKBIB	53	400	6.66667	MIA PaCa2	Control	1	7_4	Rep1_7_4	289.33	1.01969	1.02913
NFKBIB	54	410	6.83333	MIA PaCa2	Control	1	7_4	Rep1_7_4	288.312	1.01083	1.02789
NFKBIB	55	420	7	MIA PaCa2	Control	1	7_4	Rep1_7_4	291.566	1.03528	1.02608
NFKBIB	56	430	7.16667	MIA PaCa2	Control	1	7_4	Rep1_7_4	293.347	1.03355	1.02852
NFKBIB	57	440	7.33333	MIA PaCa2	Control	1	7_4	Rep1_7_4	293.366	1.03317	1.02965
NFKBIB	58	450	7.5	MIA PaCa2	Control	1	7_4	Rep1_7_4	291.654	1.02913	1.03151
NFKBIB	59	460	7.66667	MIA PaCa2	Control	1	7_4	Rep1_7_4	293.62	1.03797	1.03172
NFKBIB	60	470	7.83333	MIA PaCa2	Control	1	7_4	Rep1_7_4	292.522	1.0276	1.0302
NFKBIB	61	480	8	MIA PaCa2	Control	1	7_4	Rep1_7_4	291.758	1.02385	1.02818
NFKBIB	62	490	8.16667	MIA PaCa2	Control	1	7_4	Rep1_7_4	293.616	1.03679	1.02832
NFKBIB	63	500	8.33333	MIA PaCa2	Control	1	7_4	Rep1_7_4	291.496	1.02287	1.02711
NFKBIB	64	510	8.5	MIA PaCa2	Control	1	7_4	Rep1_7_4	291.198	1.01902	1.02757
NFKBIB	65	520	8.66667	MIA PaCa2	Control	1	7_4	Rep1_7_4	294.248	1.03014	1.02721
NFKBIB	66	530	8.83333	MIA PaCa2	Control	1	7_4	Rep1_7_4	294.185	1.02948	1.02722
NFKBIB	67	540	9	MIA PaCa2	Control	1	7_4	Rep1_7_4	295.785	1.0308	1.02694
NFKBIB	68	550	9.16667	MIA PaCa2	Control	1	7_4	Rep1_7_4	292.008	1.02138	1.02672
NFKBIB	69	560	9.33333	MIA PaCa2	Control	1	7_4	Rep1_7_4	295.613	1.03684	1.02367
NFKBIB	70	570	9.5	MIA PaCa2	Control	1	7_4	Rep1_7_4	291.962	1.02092	1.02089
NFKBIB	71	580	9.66667	MIA PaCa2	Control	1	7_4	Rep1_7_4	289.538	1.01745	1.01527
NFKBIB	72	590	9.83333	MIA PaCa2	Control	1	7_4	Rep1_7_4	292.549	1.00883	1.01341
NFKBIB	73	600	10	MIA PaCa2	Control	1	7_4	Rep1_7_4	292.098	1.01004	1.00835
NFKBIB	74	610	10.1667	MIA PaCa2	Control	1	7_4	Rep1_7_4	290.096	0.991404	1.00681
NFKBIB	75	620	10.3333	MIA PaCa2	Control	1	7_4	Rep1_7_4	292.408	1.00841	1.00569
NFKBIB	76	630	10.5	MIA PaCa2	Control	1	7_4	Rep1_7_4	291.078	1.00138	1.00558
NFKBIB	77	640	10.6667	MIA PaCa2	Control	1	7_4	Rep1_7_4	291.768	1.01014	1.00352
NFKBIB	78	650	10.8333	MIA PaCa2	Control	1	7_4	Rep1_7_4	292.531	1.00964	1.00556
NFKBIB	79	660	11	MIA PaCa2	Control	1	7_4	Rep1_7_4	291.662	1.00807	1.00523
NFKBIB	80	670	11.1667	MIA PaCa2	Control	1	7_4	Rep1_7_4	287.157	0.995554	1.00851
NFKBIB	81	680	11.3333	MIA PaCa2	Control	1	7_4	Rep1_7_4	291.405	1.00574	1.01026
NFKBIB	82	690	11.5	MIA PaCa2	Control	1	7_4	Rep1_7_4	291.497	1.00608	1.01147
NFKBIB	83	700	11.6667	MIA PaCa2	Control	1	7_4	Rep1_7_4	295.727	1.02433	1.01358
NFKBIB	84	710	11.8333	MIA PaCa2	Control	1	7_4	Rep1_7_4	293.098	1.02239	1.01798
NFKBIB	85	720	12	MIA PaCa2	Control	1	7_4	Rep1_7_4	293.377	1.01813	1.02237
NFKBIB	86	730	12.1667	MIA PaCa2	Control	1	7_4	Rep1_7_4	297.476	1.02286	1.02676
NFKBIB	1	-120	-2	MIA PaCa2	Control	1	7_5	Rep1_7_5	319.206	1.03234	1.04035
NFKBIB	2	-110	-1.83333	MIA PaCa2	Control	1	7_5	Rep1_7_5	315.37	1.0491	1.03131
NFKBIB	3	-100	-1.66667	MIA PaCa2	Control	1	7_5	Rep1_7_5	303.412	1.01162	1.02227
NFKBIB	4	-90	-1.5	MIA PaCa2	Control	1	7_5	Rep1_7_5	300.465	1.02389	1.01322
NFKBIB	5	-80	-1.33333	MIA PaCa2	Control	1	7_5	Rep1_7_5	292.096	0.991653	1.00734
NFKBIB	6	-70	-1.16667	MIA PaCa2	Control	1	7_5	Rep1_7_5	287.026	0.989867	0.999023
NFKBIB	7	-60	-1	MIA PaCa2	Control	1	7_5	Rep1_7_5	289.872	0.994081	1.00107
NFKBIB	8	-50	-0.833333	MIA PaCa2	Control	1	7_5	Rep1_7_5	285.856	0.991172	0.998818
NFKBIB	9	-40	-0.666667	MIA PaCa2	Control	1	7_5	Rep1_7_5	284.505	0.990867	1.00027
NFKBIB	10	-30	-0.5	MIA PaCa2	Control	1	7_5	Rep1_7_5	292.182	1.02595	1.0034
NFKBIB	11	-20	-0.333333	MIA PaCa2	Control	1	7_5	Rep1_7_5	288.466	1.00813	1.00793
NFKBIB	12	-10	-0.166667	MIA PaCa2	Control	1	7_5	Rep1_7_5	284.215	1.00181	1.01213
NFKBIB	13	0	0	MIA PaCa2	Control	1	7_5	Rep1_7_5	286.638	1.01182	1.01692
NFKBIB	14	10	0.166667	MIA PaCa2	Control	1	7_5	Rep1_7_5	285.166	1.02576	1.01463
NFKBIB	15	20	0.333333	MIA PaCa2	Control	1	7_5	Rep1_7_5	287.559	1.02054	1.01407
NFKBIB	16	30	0.5	MIA PaCa2	Control	1	7_5	Rep1_7_5	286.473	1.02445	1.0129
NFKBIB	17	40	0.666667	MIA PaCa2	Control	1	7_5	Rep1_7_5	282.812	1.00992	1.01244
NFKBIB	18	50	0.833333	MIA PaCa2	Control	1	7_5	Rep1_7_5	279.038	1.00419	1.00749
NFKBIB	19	60	1	MIA PaCa2	Control	1	7_5	Rep1_7_5	276.137	0.993609	1.00142
NFKBIB	20	70	1.16667	MIA PaCa2	Control	1	7_5	Rep1_7_5	278.811	1.00861	0.997521
NFKBIB	21	80	1.33333	MIA PaCa2	Control	1	7_5	Rep1_7_5	274.096	0.991131	0.996833
NFKBIB	22	90	1.5	MIA PaCa2	Control	1	7_5	Rep1_7_5	273.033	0.977998	0.994457
NFKBIB	23	100	1.66667	MIA PaCa2	Control	1	7_5	Rep1_7_5	274.993	0.997187	0.997544
NFKBIB	24	110	1.83333	MIA PaCa2	Control	1	7_5	Rep1_7_5	278.84	1.00511	0.999648
NFKBIB	25	120	2	MIA PaCa2	Control	1	7_5	Rep1_7_5	274.381	0.987555	1.00239
NFKBIB	26	130	2.16667	MIA PaCa2	Control	1	7_5	Rep1_7_5	281.574	1.01522	1.00776
NFKBIB	27	140	2.33333	MIA PaCa2	Control	1	7_5	Rep1_7_5	283.566	1.02334	1.01055
NFKBIB	28	150	2.5	MIA PaCa2	Control	1	7_5	Rep1_7_5	278.7	1.01032	1.0111
NFKBIB	29	160	2.66667	MIA PaCa2	Control	1	7_5	Rep1_7_5	280.642	1.01559	1.01472
NFKBIB	30	170	2.83333	MIA PaCa2	Control	1	7_5	Rep1_7_5	280.096	1.01673	1.01487
NFKBIB	31	180	3	MIA PaCa2	Control	1	7_5	Rep1_7_5	279.25	1.00893	1.01486
NFKBIB	32	190	3.16667	MIA PaCa2	Control	1	7_5	Rep1_7_5	280.861	1.01292	1.01483
NFKBIB	33	200	3.33333	MIA PaCa2	Control	1	7_5	Rep1_7_5	281.413	1.01628	1.01624
NFKBIB	34	210	3.5	MIA PaCa2	Control	1	7_5	Rep1_7_5	284.509	1.02328	1.01866
NFKBIB	35	220	3.66667	MIA PaCa2	Control	1	7_5	Rep1_7_5	278.969	1.01012	1.01862
NFKBIB	36	230	3.83333	MIA PaCa2	Control	1	7_5	Rep1_7_5	282.062	1.02544	1.01784
NFKBIB	37	240	4	MIA PaCa2	Control	1	7_5	Rep1_7_5	283.103	1.03364	1.01584
NFKBIB	38	250	4.16667	MIA PaCa2	Control	1	7_5	Rep1_7_5	281.482	1.00864	1.01111
NFKBIB	39	260	4.33333	MIA PaCa2	Control	1	7_5	Rep1_7_5	279.775	1.0075	1.01076
NFKBIB	40	270	4.5	MIA PaCa2	Control	1	7_5	Rep1_7_5	277.621	1.00227	1.00911
NFKBIB	41	280	4.66667	MIA PaCa2	Control	1	7_5	Rep1_7_5	274.642	0.990157	1.00566
NFKBIB	42	290	4.83333	MIA PaCa2	Control	1	7_5	Rep1_7_5	277.838	1.00767	1.0079
NFKBIB	43	300	5	MIA PaCa2	Control	1	7_5	Rep1_7_5	278.732	1.01387	1.00656
NFKBIB	44	310	5.16667	MIA PaCa2	Control	1	7_5	Rep1_7_5	281.185	1.00951	1.00668
NFKBIB	45	320	5.33333	MIA PaCa2	Control	1	7_5	Rep1_7_5	281.736	1.02432	1.00824
NFKBIB	46	330	5.5	MIA PaCa2	Control	1	7_5	Rep1_7_5	278.612	0.998098	1.00929
NFKBIB	47	340	5.66667	MIA PaCa2	Control	1	7_5	Rep1_7_5	278.077	1.00315	1.00887
NFKBIB	48	350	5.83333	MIA PaCa2	Control	1	7_5	Rep1_7_5	279.995	1.00108	1.00795
NFKBIB	49	360	6	MIA PaCa2	Control	1	7_5	Rep1_7_5	281.361	1.01501	1.00406
NFKBIB	50	370	6.16667	MIA PaCa2	Control	1	7_5	Rep1_7_5	282.772	1.01094	1.00483
NFKBIB	51	380	6.33333	MIA PaCa2	Control	1	7_5	Rep1_7_5	281.387	1.00302	1.00353
NFKBIB	52	390	6.5	MIA PaCa2	Control	1	7_5	Rep1_7_5	282.437	0.997113	1.00318
NFKBIB	53	400	6.66667	MIA PaCa2	Control	1	7_5	Rep1_7_5	284.738	1.0035	0.99864
NFKBIB	54	410	6.83333	MIA PaCa2	Control	1	7_5	Rep1_7_5	283.533	0.994069	0.996335
NFKBIB	55	420	7	MIA PaCa2	Control	1	7_5	Rep1_7_5	281.243	0.998623	0.997081
NFKBIB	56	430	7.16667	MIA PaCa2	Control	1	7_5	Rep1_7_5	279.059	0.983209	0.996453
NFKBIB	57	440	7.33333	MIA PaCa2	Control	1	7_5	Rep1_7_5	282.473	0.994807	0.996791
NFKBIB	58	450	7.5	MIA PaCa2	Control	1	7_5	Rep1_7_5	285.735	1.00825	0.998367
NFKBIB	59	460	7.66667	MIA PaCa2	Control	1	7_5	Rep1_7_5	280.818	0.992714	0.999807
NFKBIB	60	470	7.83333	MIA PaCa2	Control	1	7_5	Rep1_7_5	286.336	1.00587	1.00262
NFKBIB	61	480	8	MIA PaCa2	Control	1	7_5	Rep1_7_5	286.414	1.0051	1.00432
NFKBIB	62	490	8.16667	MIA PaCa2	Control	1	7_5	Rep1_7_5	285.662	1.00871	1.00431
NFKBIB	63	500	8.33333	MIA PaCa2	Control	1	7_5	Rep1_7_5	285.801	1.00289	1.00595
NFKBIB	64	510	8.5	MIA PaCa2	Control	1	7_5	Rep1_7_5	287.68	1.00671	1.00503
NFKBIB	65	520	8.66667	MIA PaCa2	Control	1	7_5	Rep1_7_5	287.969	1.00816	1.00314
NFKBIB	66	530	8.83333	MIA PaCa2	Control	1	7_5	Rep1_7_5	286.962	1.00421	1.00146
NFKBIB	67	540	9	MIA PaCa2	Control	1	7_5	Rep1_7_5	286.782	0.999424	1.00155
NFKBIB	68	550	9.16667	MIA PaCa2	Control	1	7_5	Rep1_7_5	283.578	0.991899	1.00192
NFKBIB	69	560	9.33333	MIA PaCa2	Control	1	7_5	Rep1_7_5	284.24	0.996948	0.999431
NFKBIB	70	570	9.5	MIA PaCa2	Control	1	7_5	Rep1_7_5	286.983	1.0035	0.995895
NFKBIB	71	580	9.66667	MIA PaCa2	Control	1	7_5	Rep1_7_5	287.211	1.00927	0.990996
NFKBIB	72	590	9.83333	MIA PaCa2	Control	1	7_5	Rep1_7_5	287.308	0.990763	0.98771
NFKBIB	73	600	10	MIA PaCa2	Control	1	7_5	Rep1_7_5	283.253	0.979455	0.984123
NFKBIB	74	610	10.1667	MIA PaCa2	Control	1	7_5	Rep1_7_5	282.41	0.965136	0.982412
NFKBIB	75	620	10.3333	MIA PaCa2	Control	1	7_5	Rep1_7_5	280.949	0.968895	0.980062
NFKBIB	76	630	10.5	MIA PaCa2	Control	1	7_5	Rep1_7_5	282.489	0.971835	0.980258
NFKBIB	77	640	10.6667	MIA PaCa2	Control	1	7_5	Rep1_7_5	286.393	0.991529	0.981036
NFKBIB	78	650	10.8333	MIA PaCa2	Control	1	7_5	Rep1_7_5	287.657	0.99282	0.983984
NFKBIB	79	660	11	MIA PaCa2	Control	1	7_5	Rep1_7_5	287.05	0.992133	0.986922
NFKBIB	80	670	11.1667	MIA PaCa2	Control	1	7_5	Rep1_7_5	284.085	0.984903	0.989749
NFKBIB	81	680	11.3333	MIA PaCa2	Control	1	7_5	Rep1_7_5	285.621	0.985774	0.990806
NFKBIB	82	690	11.5	MIA PaCa2	Control	1	7_5	Rep1_7_5	286.68	0.989456	0.992047
NFKBIB	83	700	11.6667	MIA PaCa2	Control	1	7_5	Rep1_7_5	286.287	0.99163	0.991497
NFKBIB	84	710	11.8333	MIA PaCa2	Control	1	7_5	Rep1_7_5	286.37	0.998925	0.993321
NFKBIB	85	720	12	MIA PaCa2	Control	1	7_5	Rep1_7_5	288.588	1.00151	0.995145
NFKBIB	86	730	12.1667	MIA PaCa2	Control	1	7_5	Rep1_7_5	287.42	0.988286	0.99697
NFKBIB	1	-120	-2	MIA PaCa2	TNF	1	7_9	Rep1_7_9	316.424	1.02334	1.03499
NFKBIB	2	-110	-1.83333	MIA PaCa2	TNF	1	7_9	Rep1_7_9	311.629	1.03666	1.03289
NFKBIB	3	-100	-1.66667	MIA PaCa2	TNF	1	7_9	Rep1_7_9	311.847	1.03975	1.03079
NFKBIB	4	-90	-1.5	MIA PaCa2	TNF	1	7_9	Rep1_7_9	300.4	1.02367	1.02869
NFKBIB	5	-80	-1.33333	MIA PaCa2	TNF	1	7_9	Rep1_7_9	305.024	1.03554	1.02822
NFKBIB	6	-70	-1.16667	MIA PaCa2	TNF	1	7_9	Rep1_7_9	300.649	1.03685	1.02154
NFKBIB	7	-60	-1	MIA PaCa2	TNF	1	7_9	Rep1_7_9	293.057	1.005	1.02082
NFKBIB	8	-50	-0.833333	MIA PaCa2	TNF	1	7_9	Rep1_7_9	294.187	1.02006	1.02116
NFKBIB	9	-40	-0.666667	MIA PaCa2	TNF	1	7_9	Rep1_7_9	284.222	0.989882	1.02056
NFKBIB	10	-30	-0.5	MIA PaCa2	TNF	1	7_9	Rep1_7_9	294.68	1.03472	1.01663
NFKBIB	11	-20	-0.333333	MIA PaCa2	TNF	1	7_9	Rep1_7_9	293.593	1.02605	1.10349
NFKBIB	12	-10	-0.166667	MIA PaCa2	TNF	1	7_9	Rep1_7_9	292.591	1.03133	1.18942
NFKBIB	13	0	0	MIA PaCa2	TNF	1	7_9	Rep1_7_9	285.936	1.00934	1.28029
NFKBIB	14	10	0.166667	MIA PaCa2	TNF	1	7_9	Rep1_7_9	448.423	1.61301	1.36263
NFKBIB	15	20	0.333333	MIA PaCa2	TNF	1	7_9	Rep1_7_9	456.929	1.62162	1.44821
NFKBIB	16	30	0.5	MIA PaCa2	TNF	1	7_9	Rep1_7_9	454.667	1.62592	1.52988
NFKBIB	17	40	0.666667	MIA PaCa2	TNF	1	7_9	Rep1_7_9	451.165	1.61111	1.61511
NFKBIB	18	50	0.833333	MIA PaCa2	TNF	1	7_9	Rep1_7_9	451.578	1.62511	1.61397
NFKBIB	19	60	1	MIA PaCa2	TNF	1	7_9	Rep1_7_9	445.511	1.60306	1.60791
NFKBIB	20	70	1.16667	MIA PaCa2	TNF	1	7_9	Rep1_7_9	443.938	1.60597	1.60554
NFKBIB	21	80	1.33333	MIA PaCa2	TNF	1	7_9	Rep1_7_9	443.863	1.60501	1.60217
[truncated: 16,577 more rows]
